# Supplementary material for: Genetic differences among ethnic groups
Source: PubMed Central journal article supplement (PMC4687076; doi:10.1186/s12864-015-2328-0), 2015-12-21

# rs6023406\_G

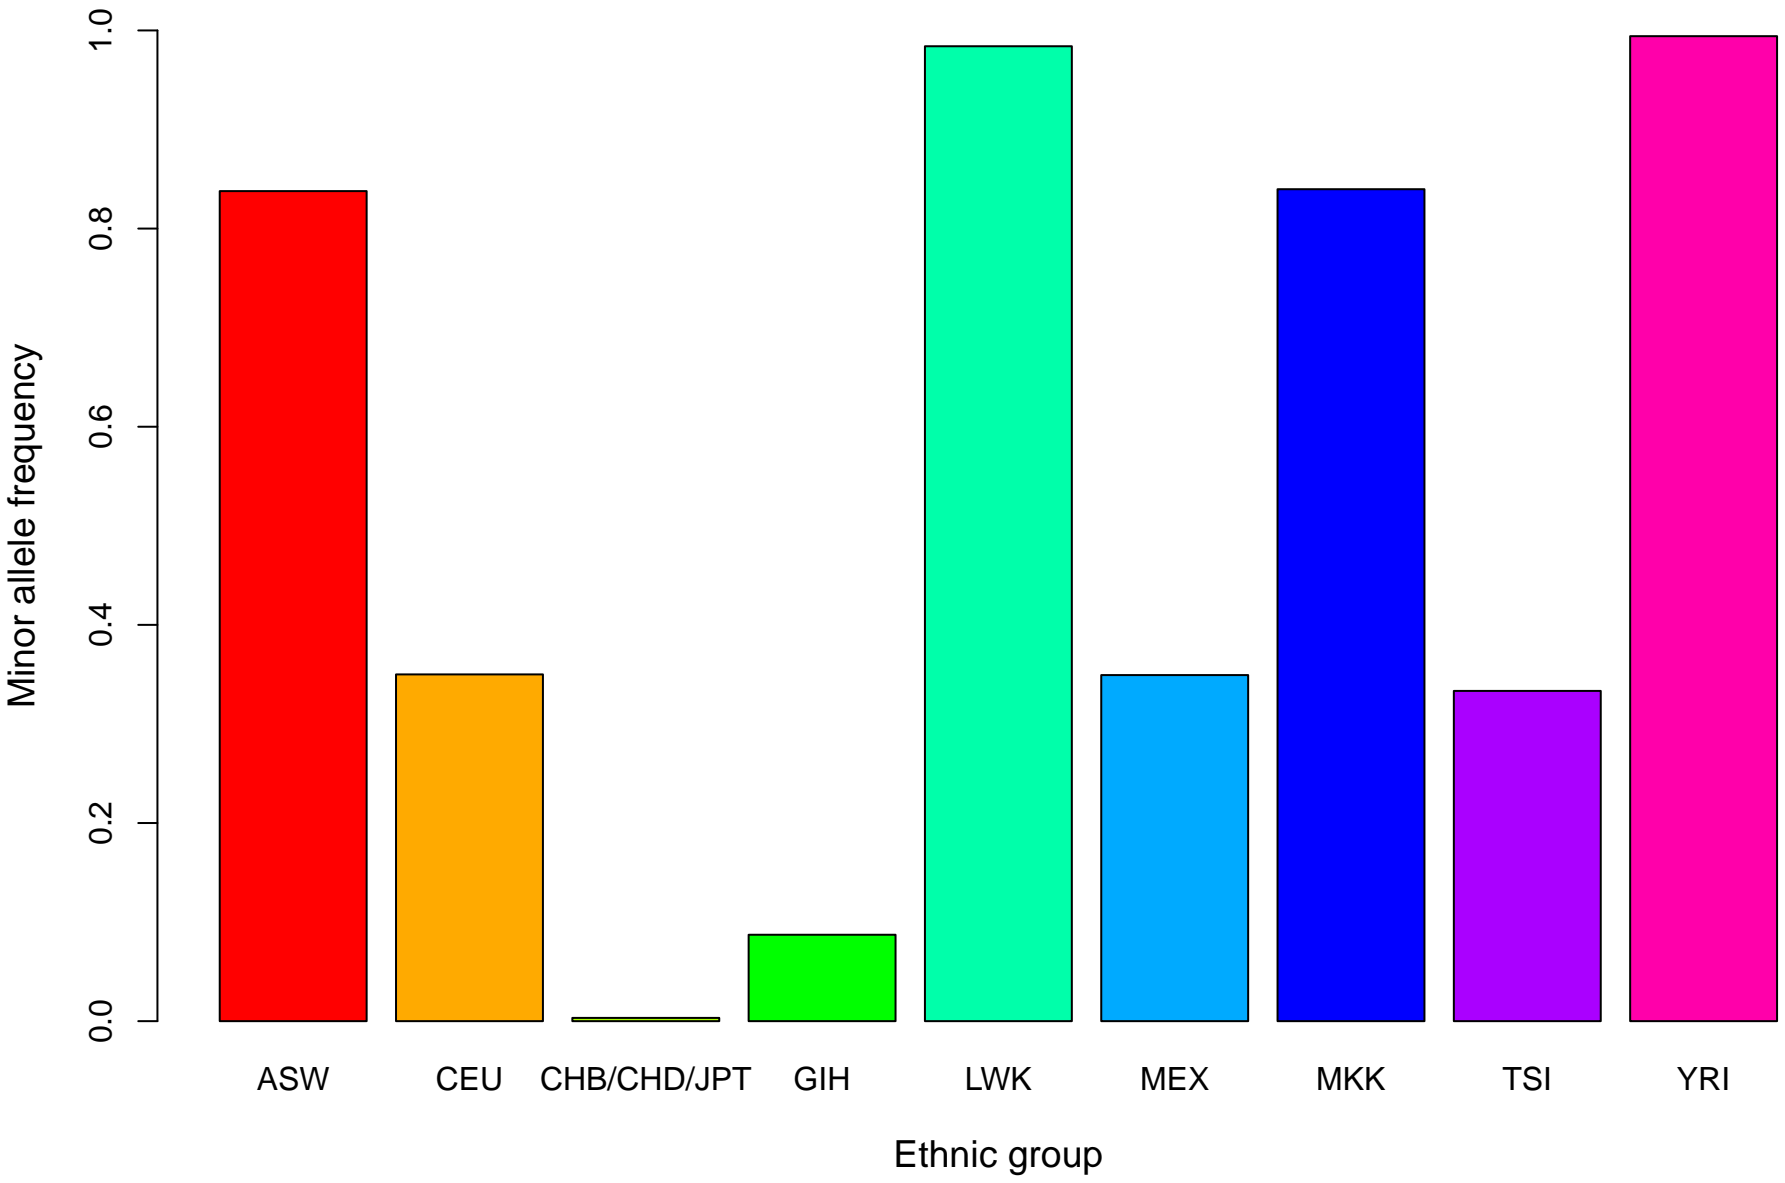

# rs1426654\_A

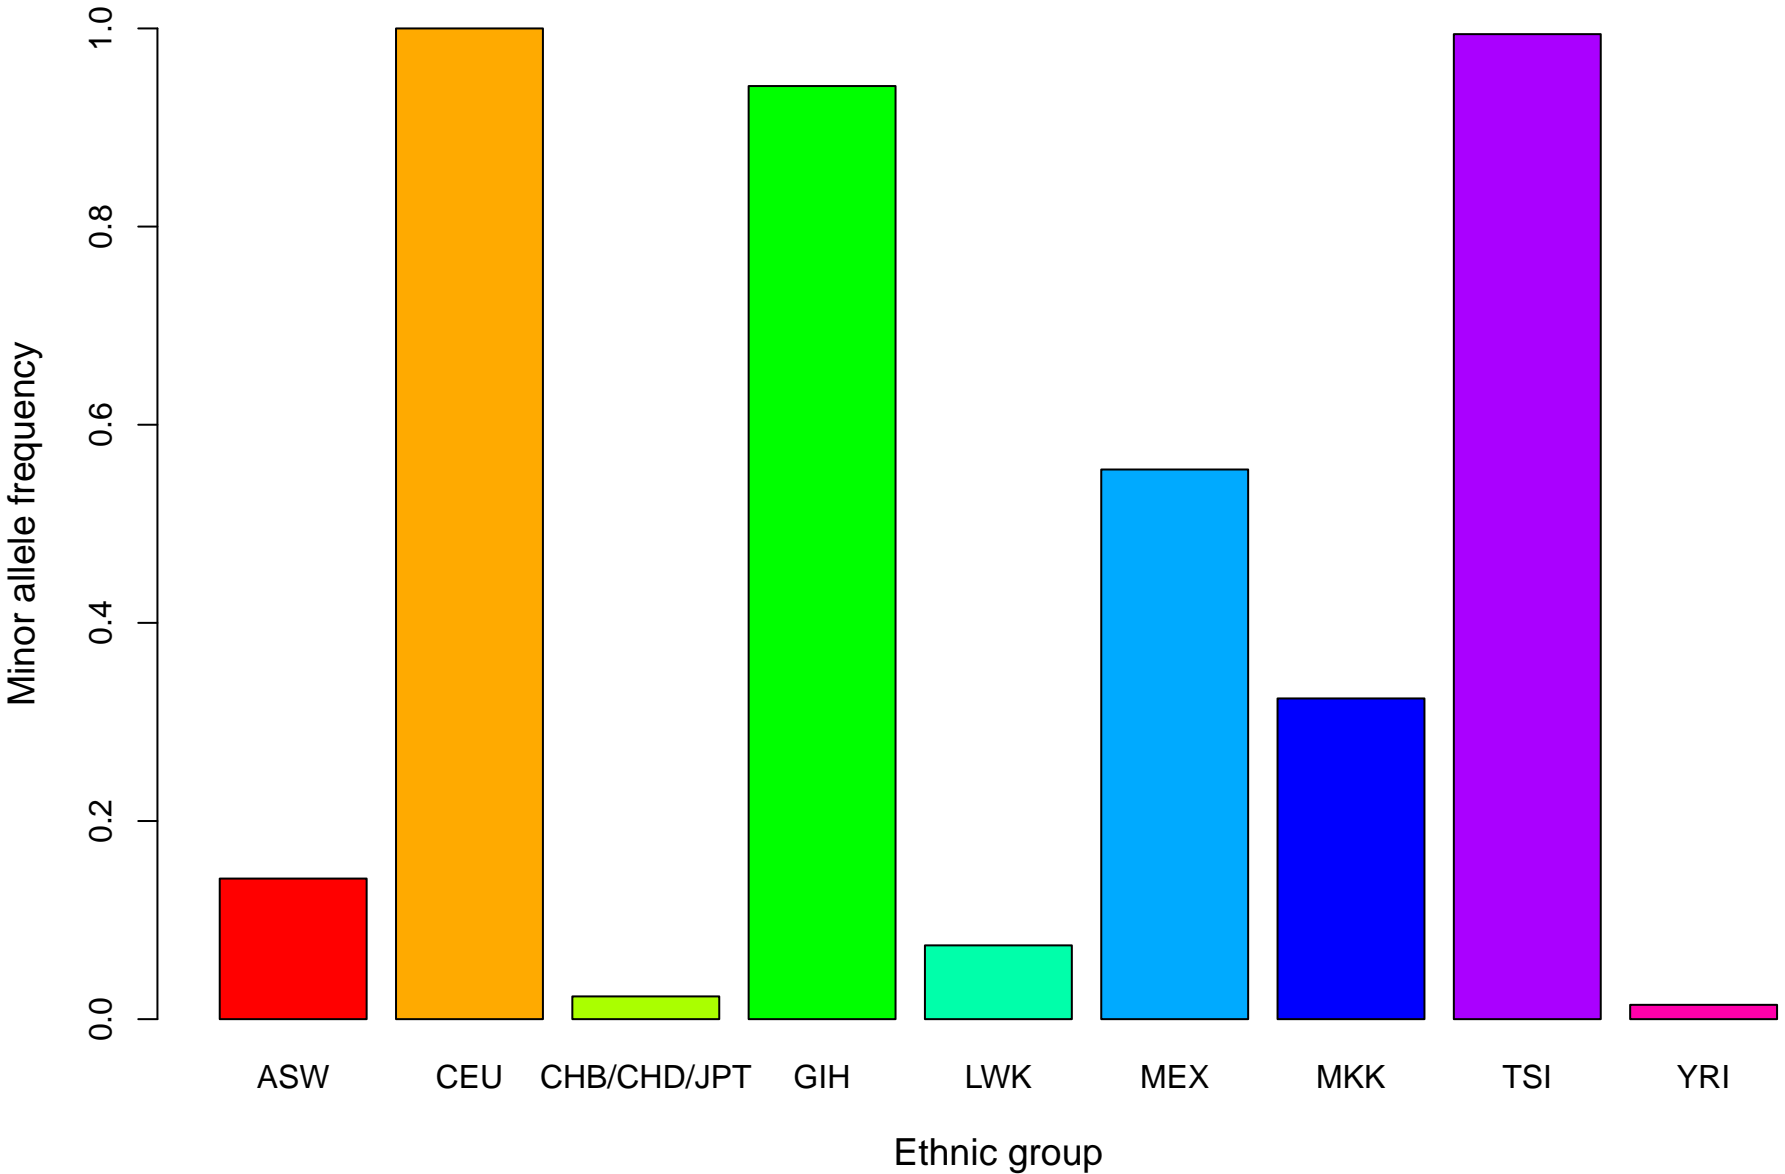

# rs1325421\_T

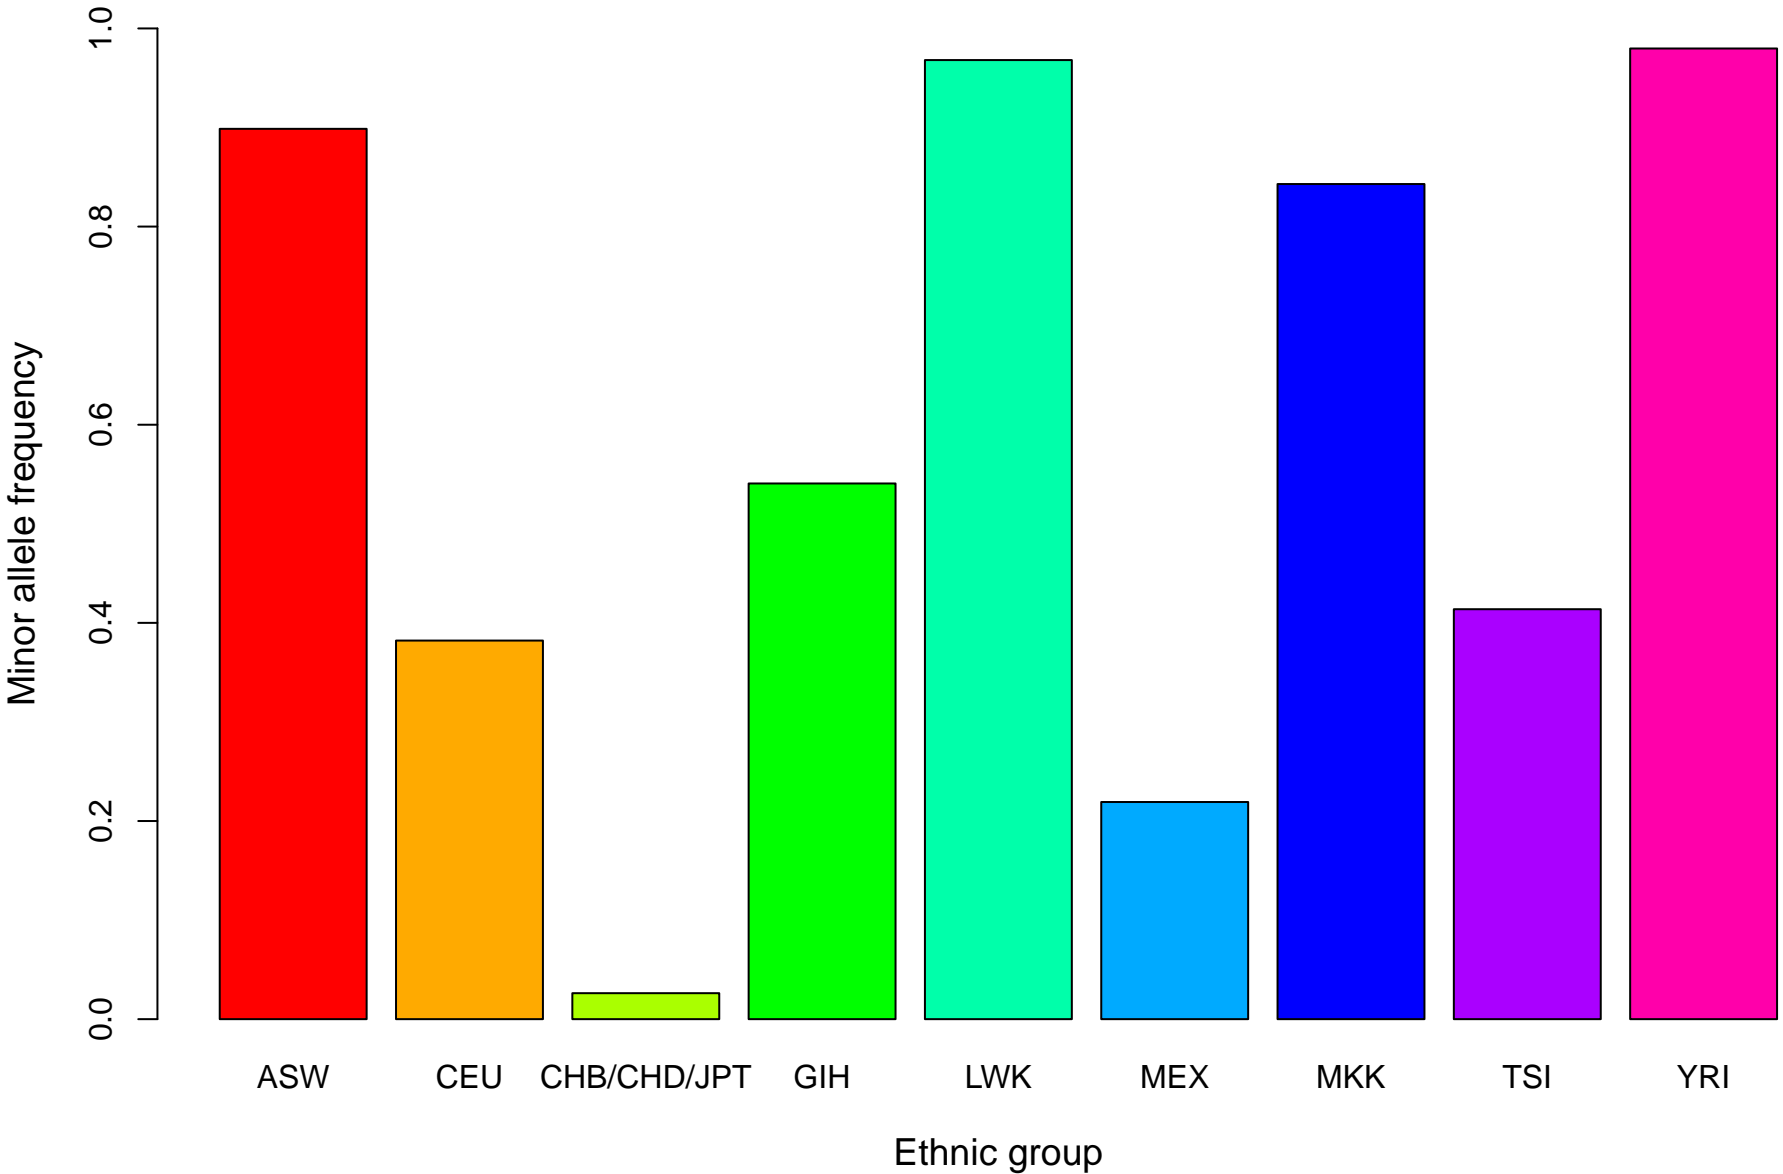

# rs8049040\_G

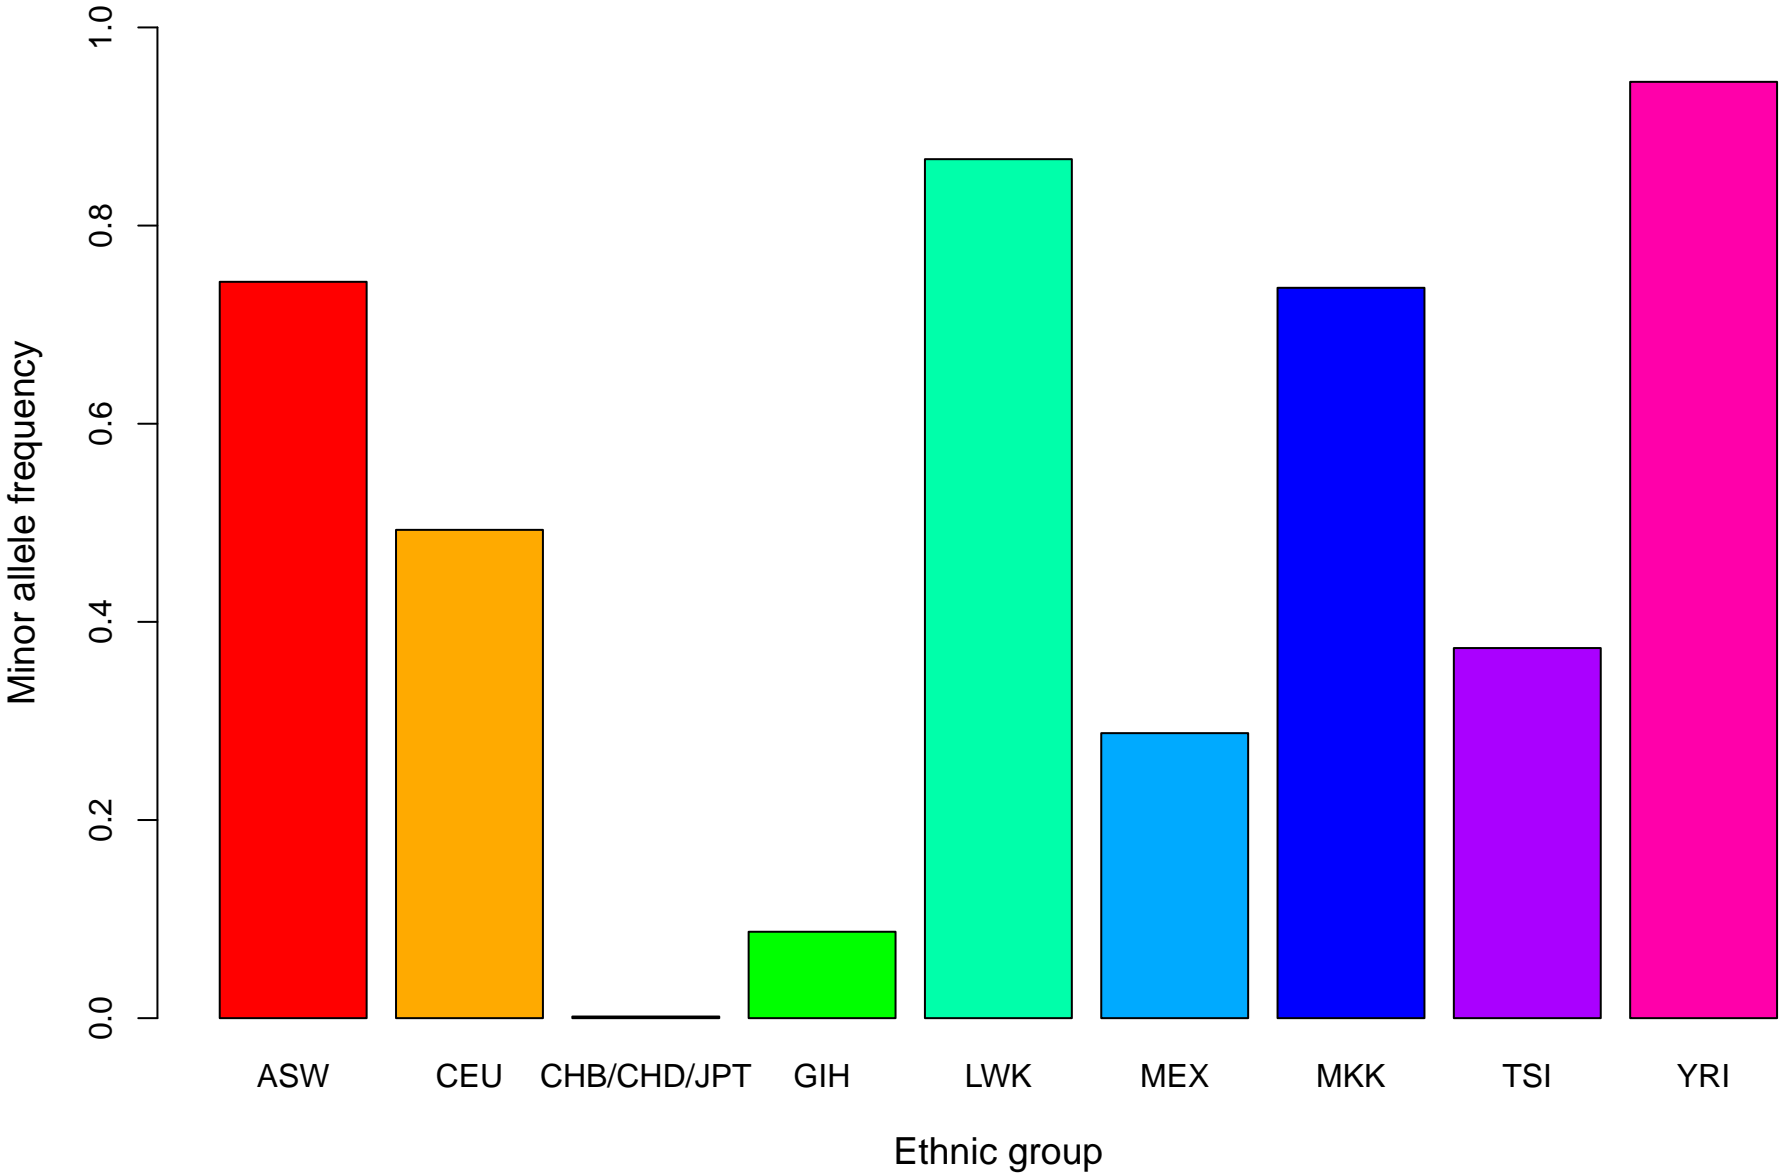

# rs13432350\_T

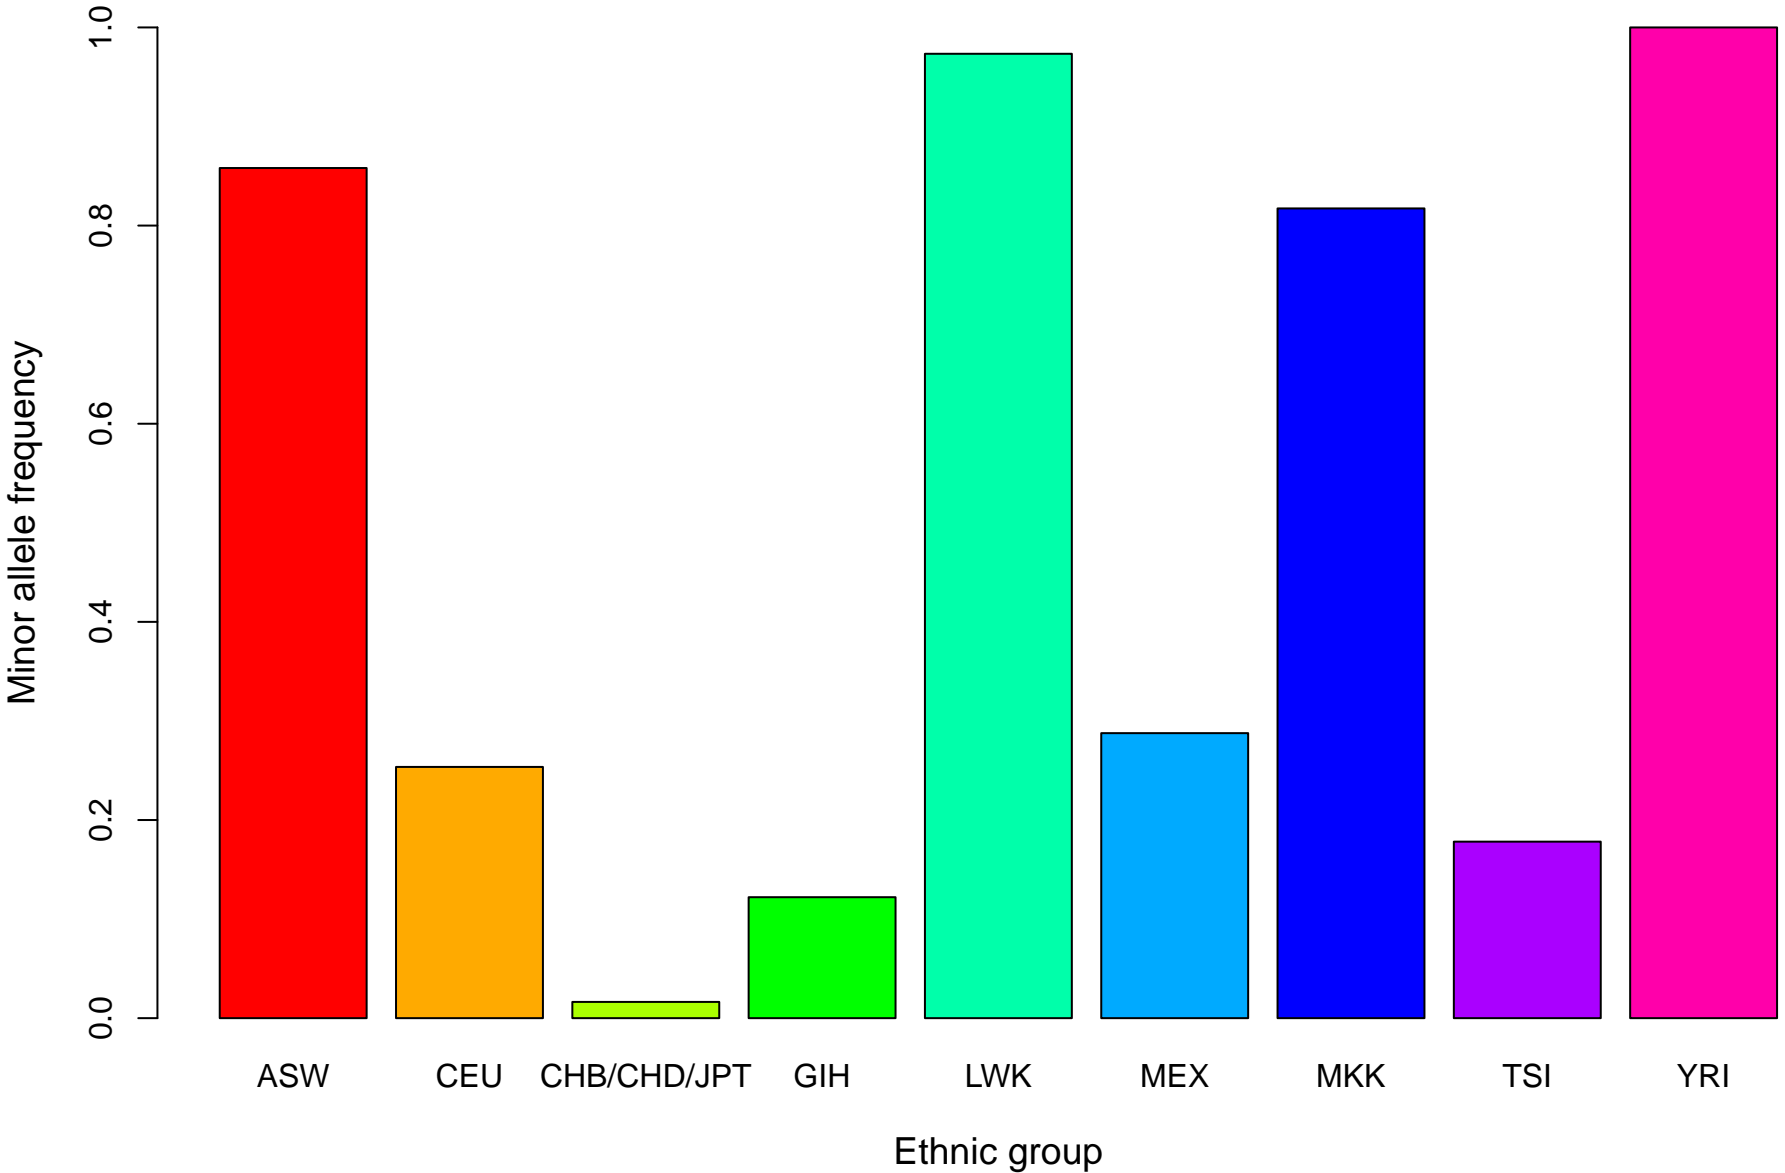

# rs1834640\_A

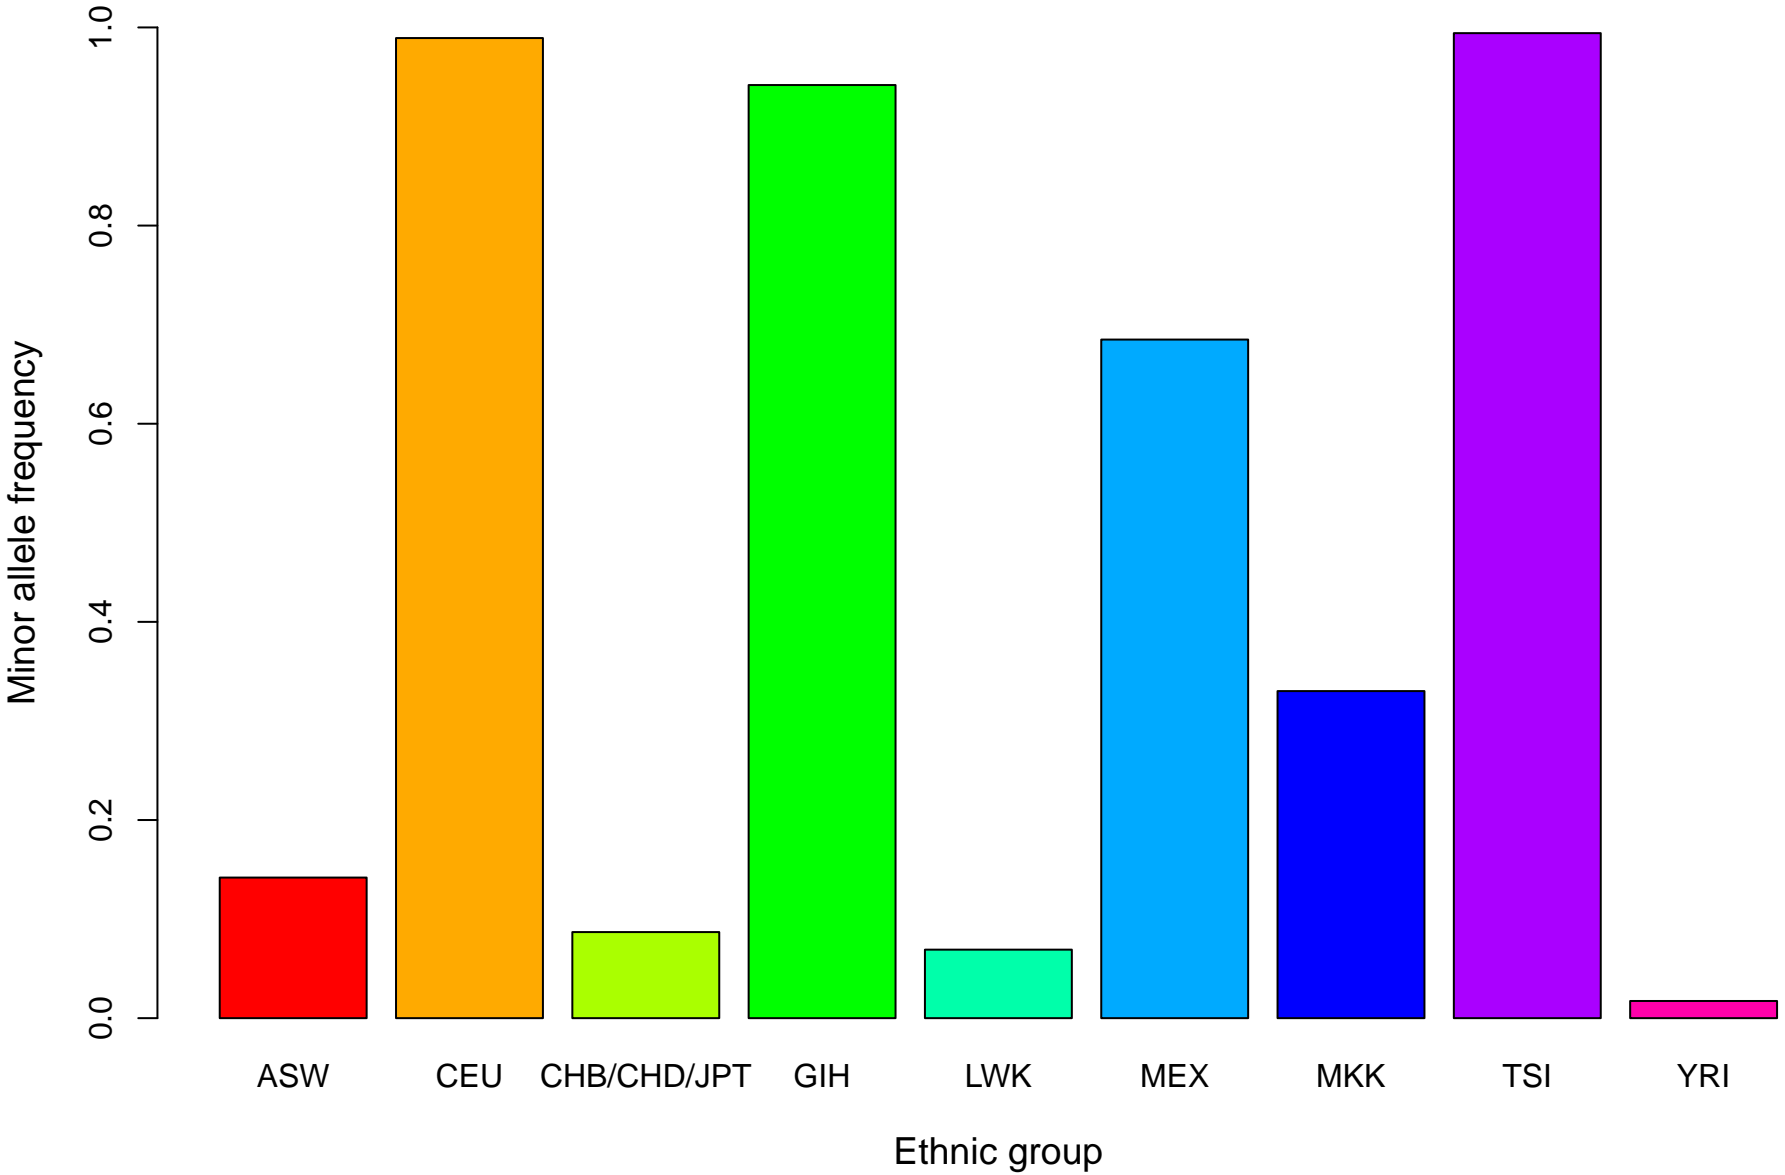

# rs1325055\_G

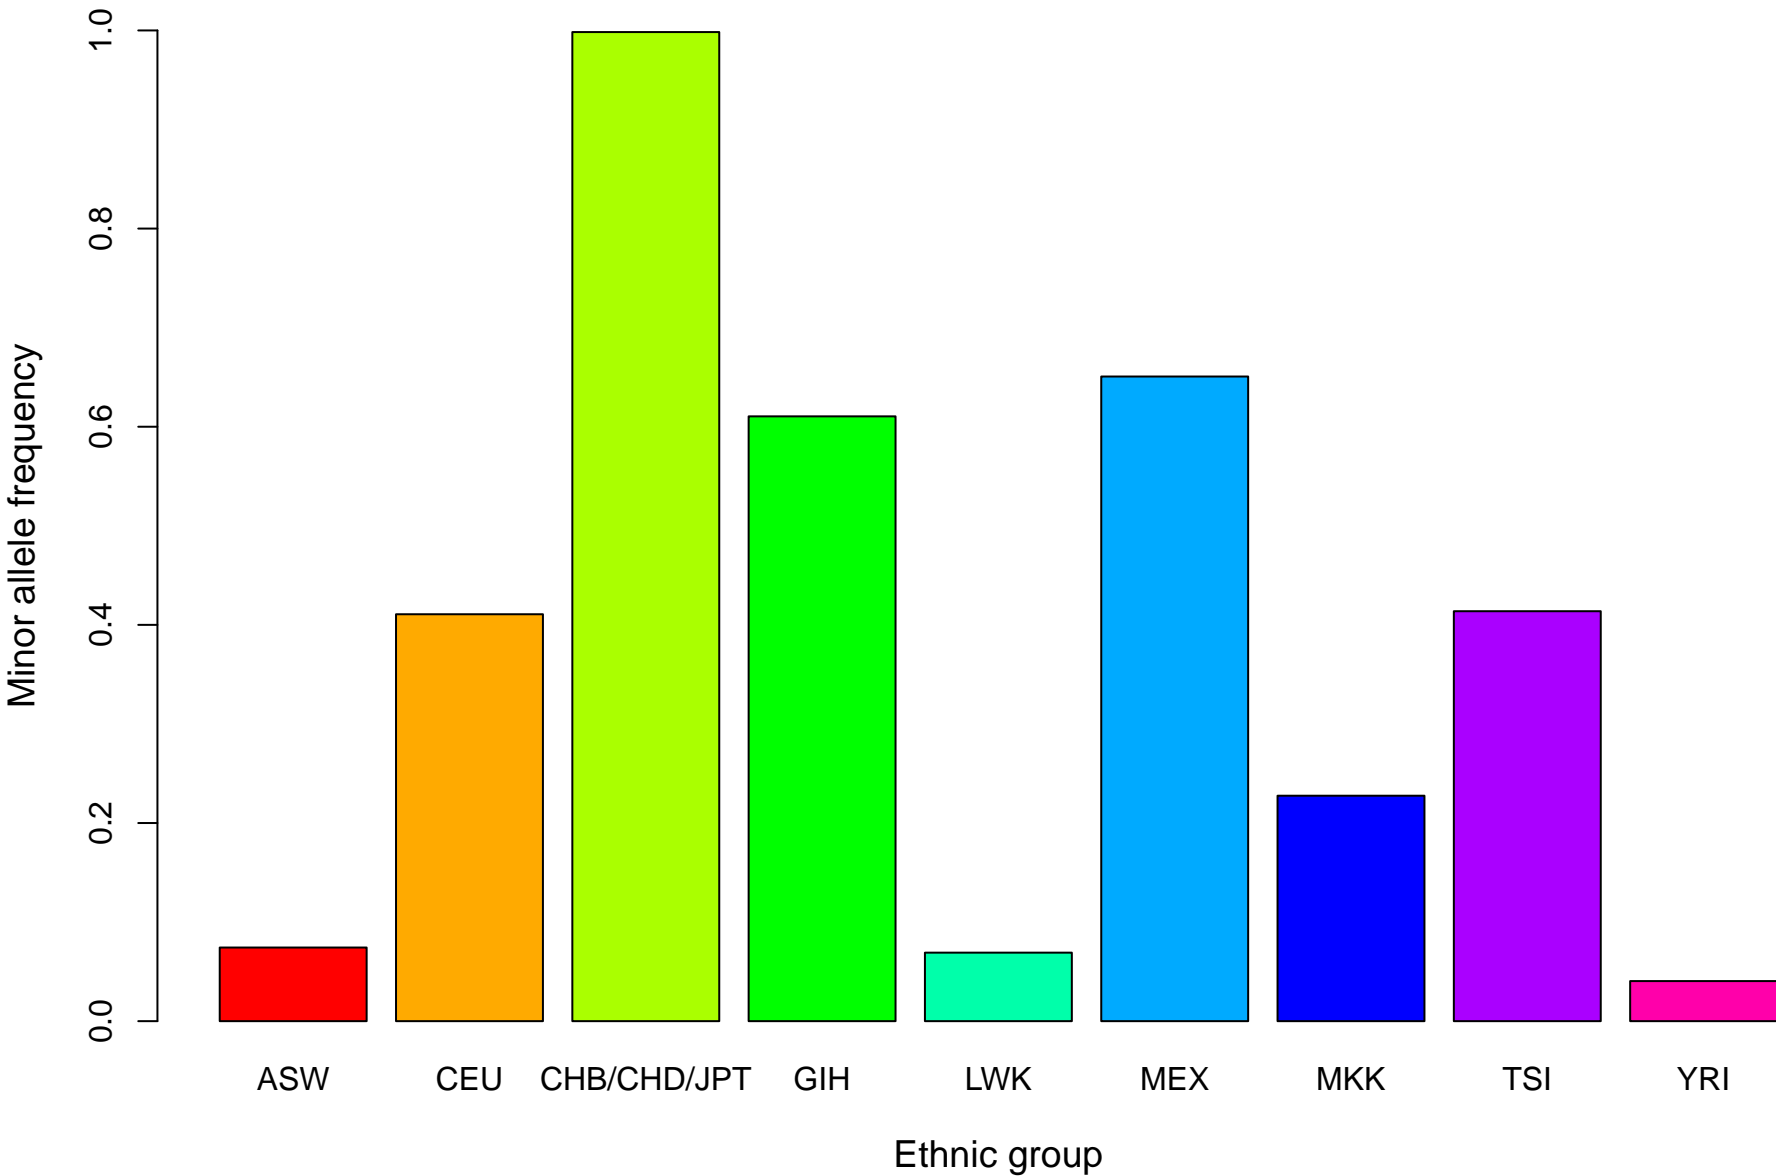

# rs3764719\_C

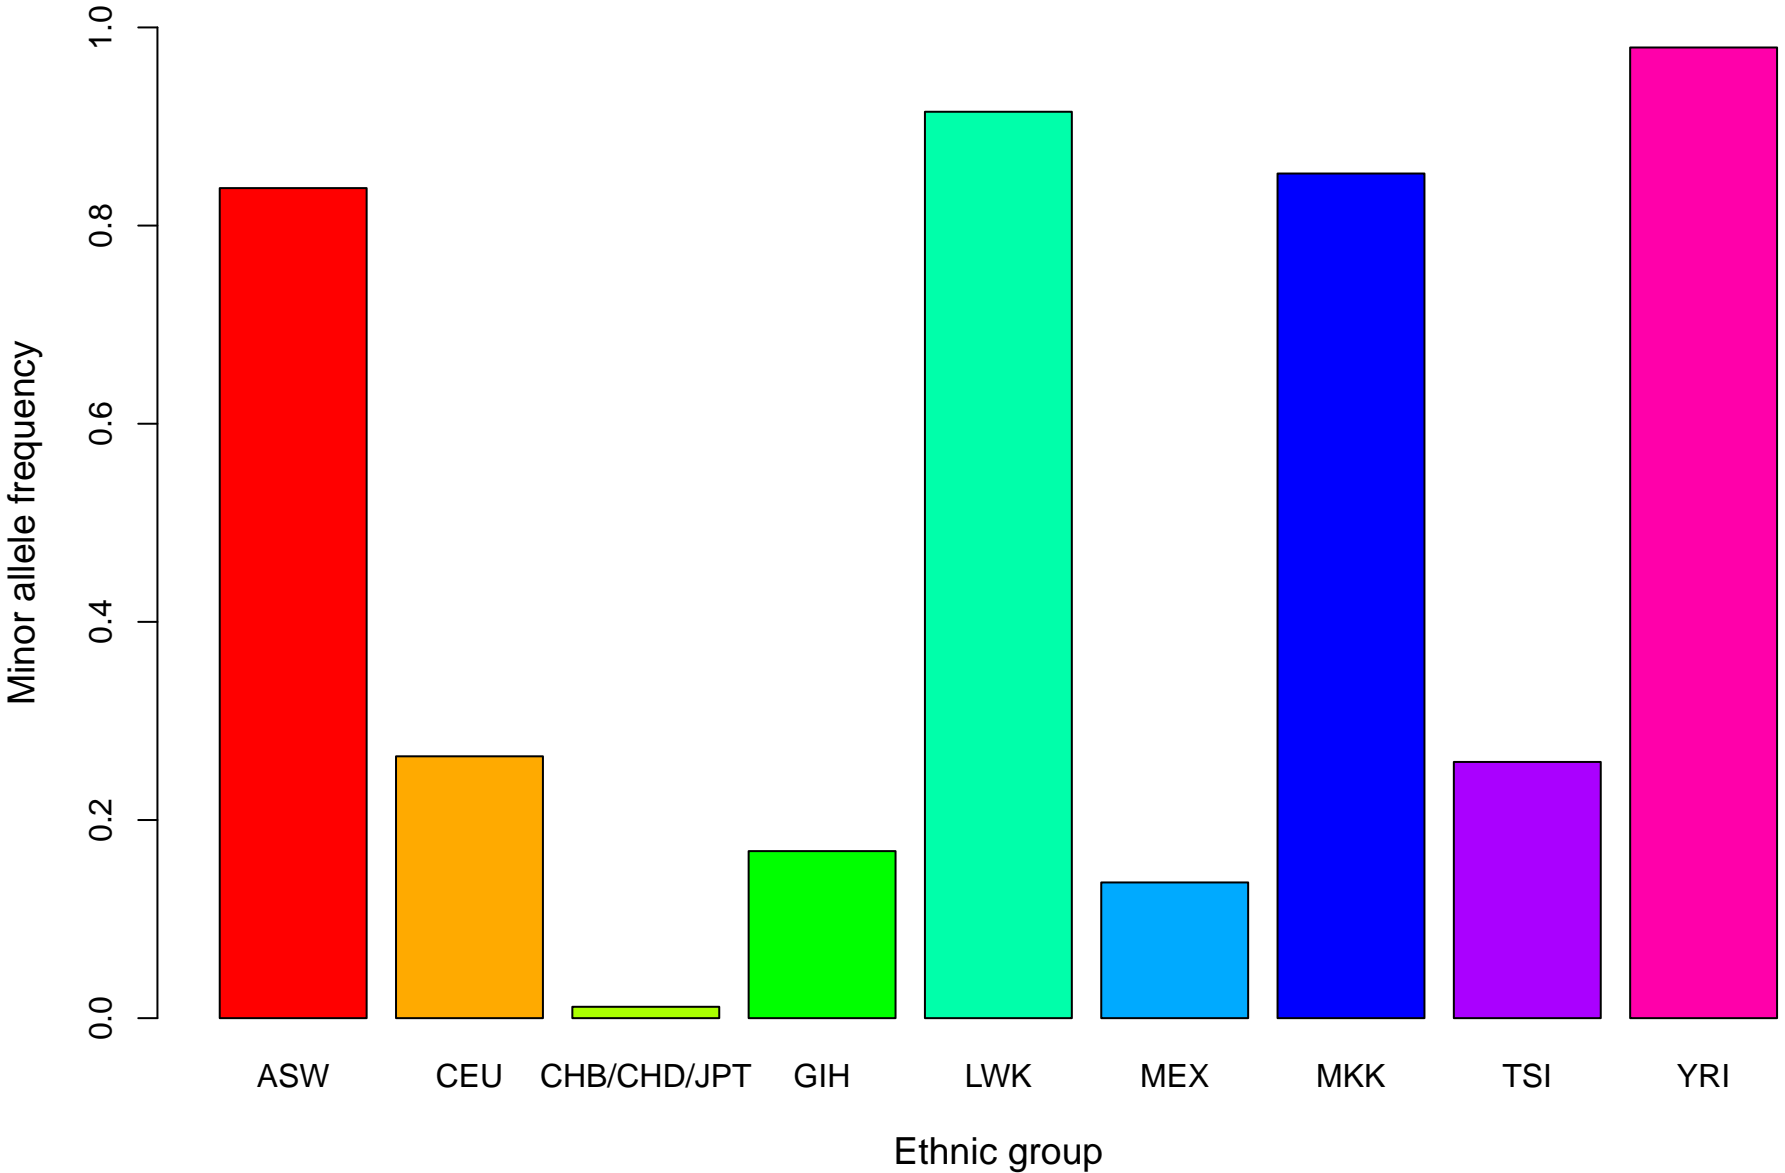



# rs2973133\_A

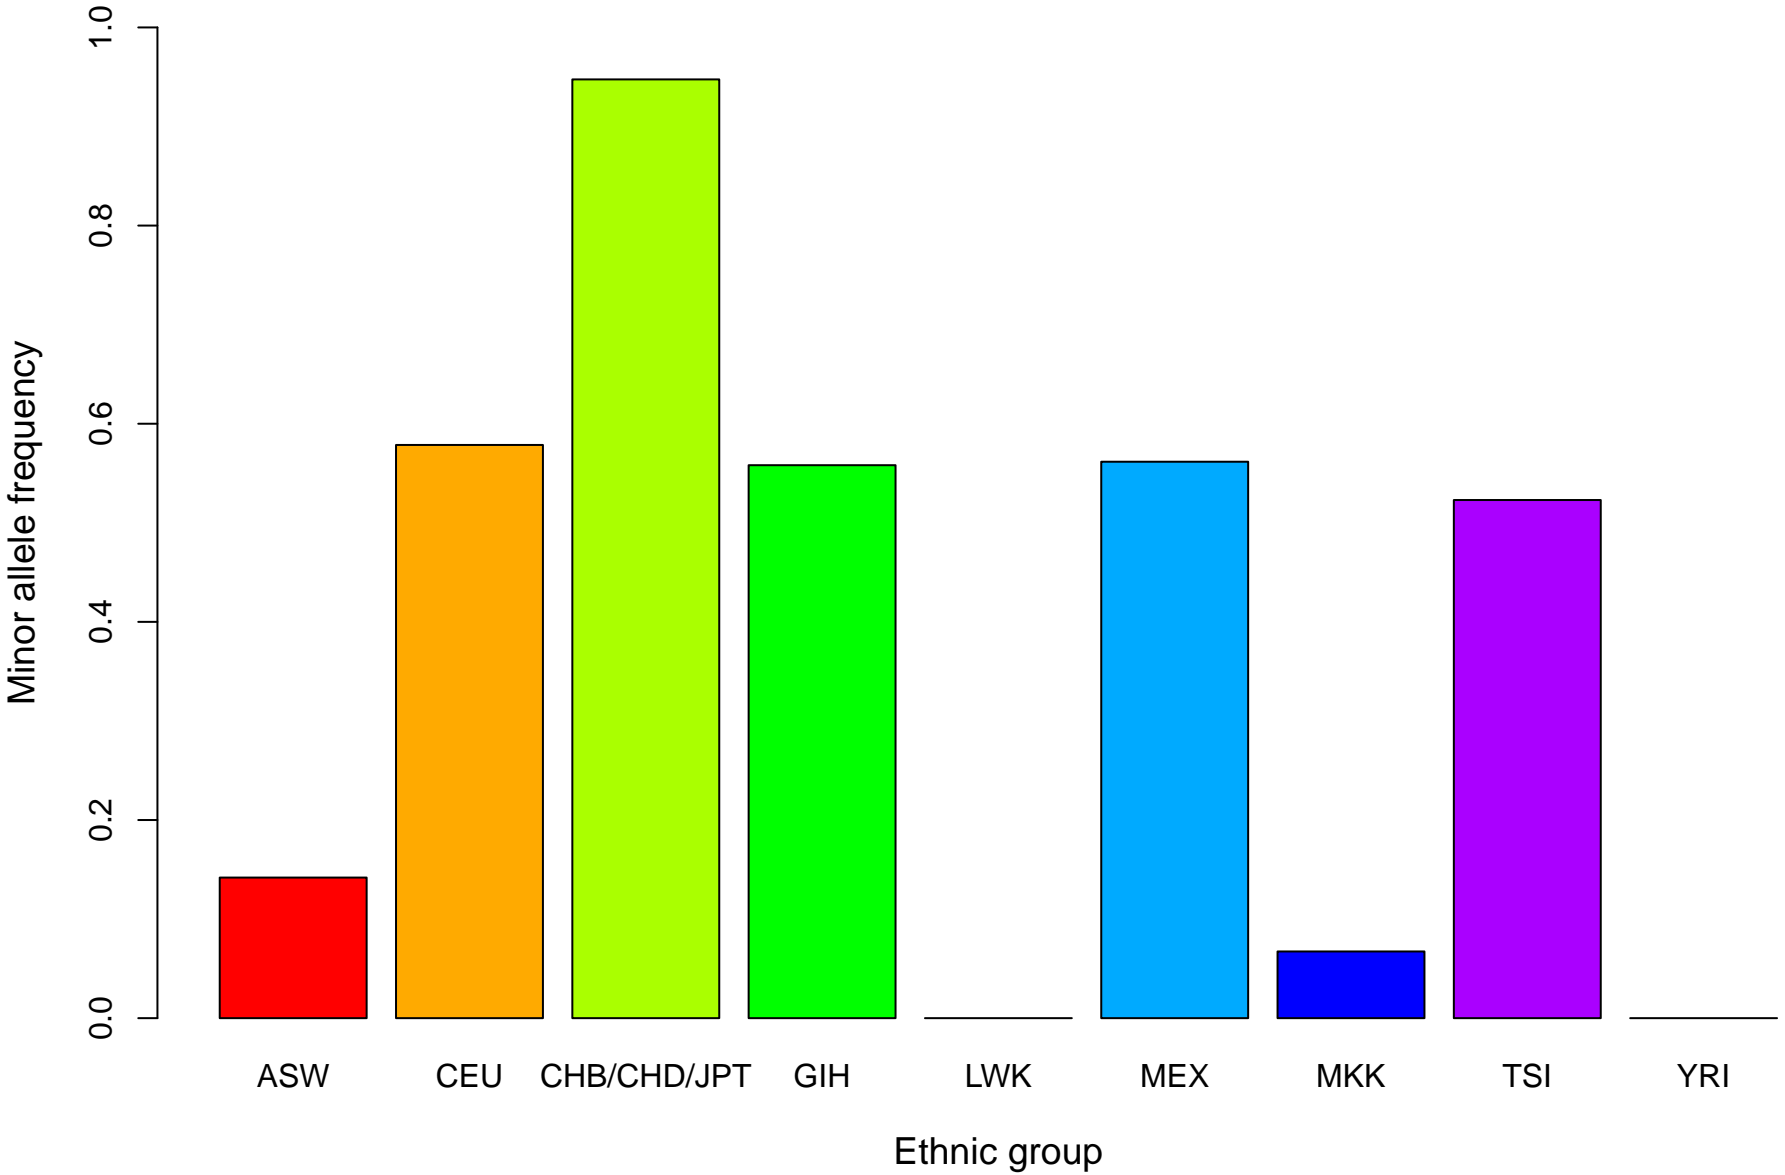

# rs11085023\_G

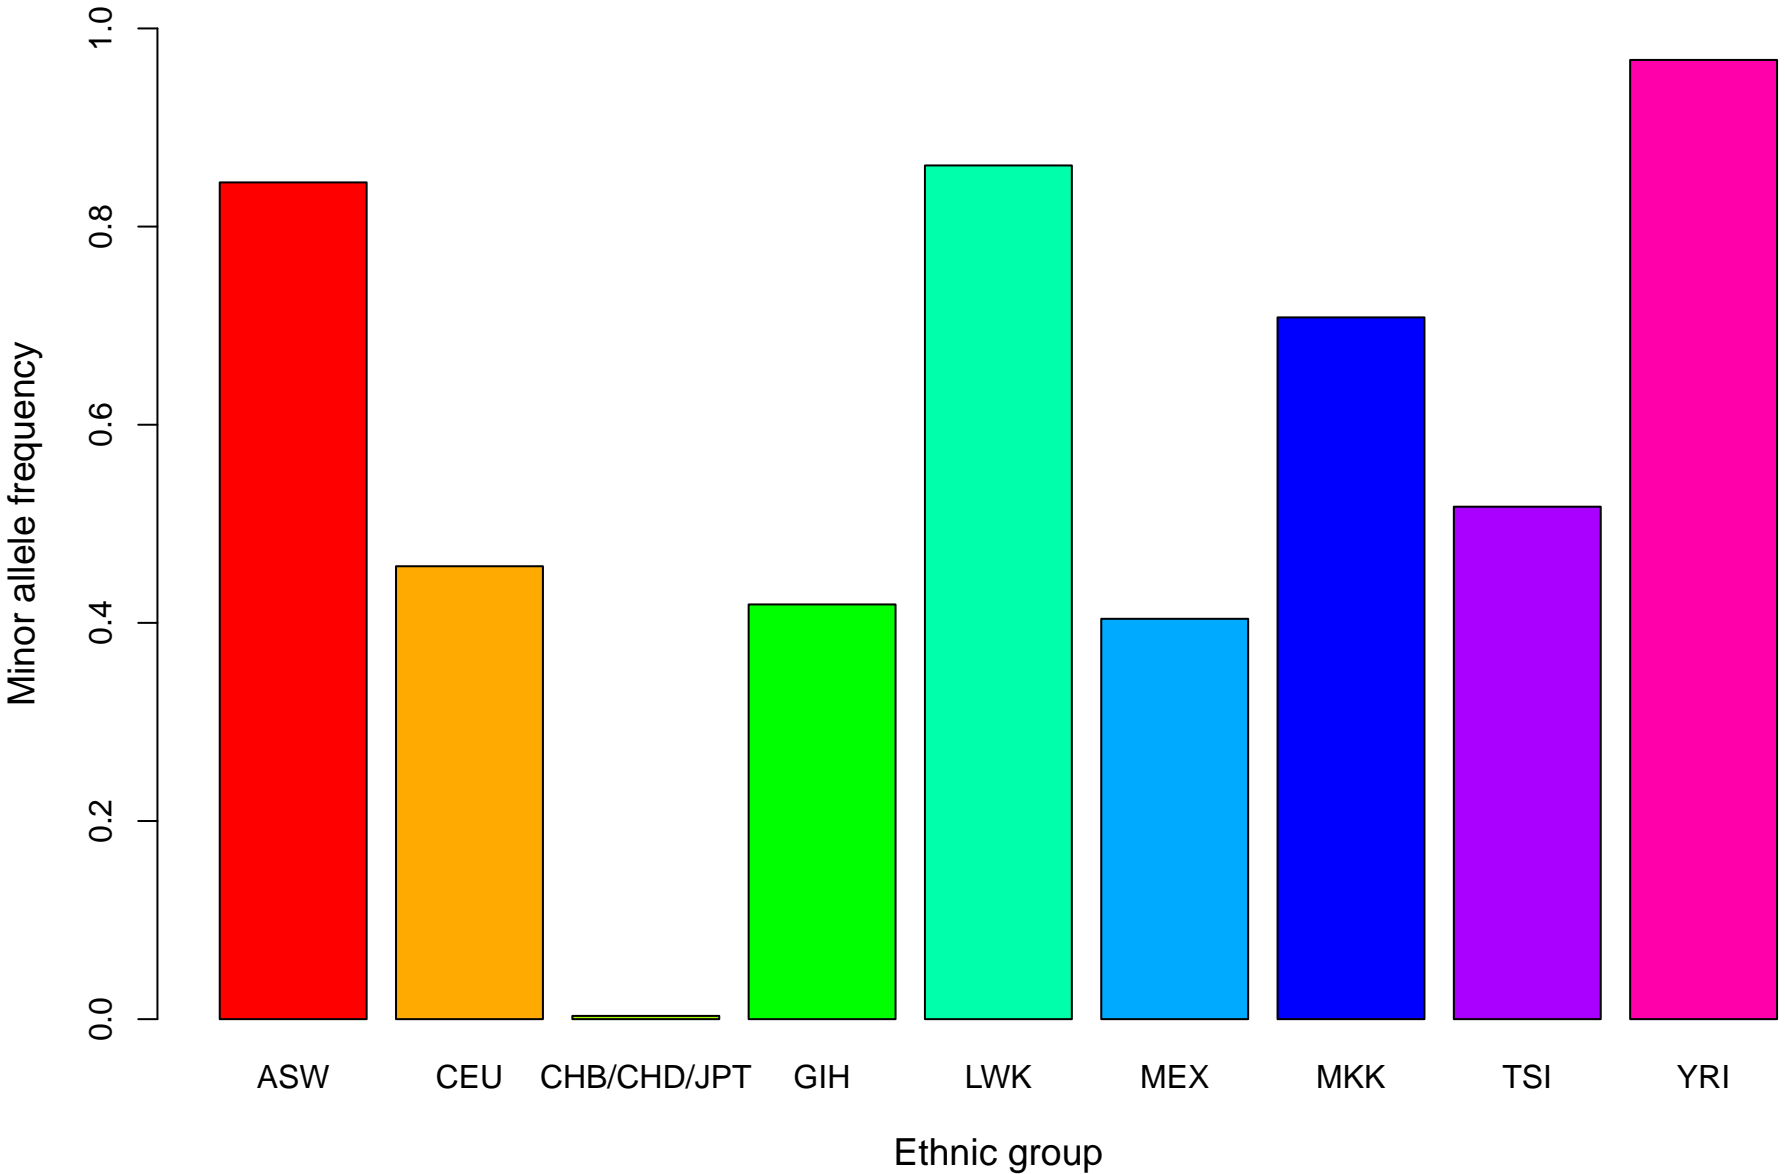

# rs260690\_A

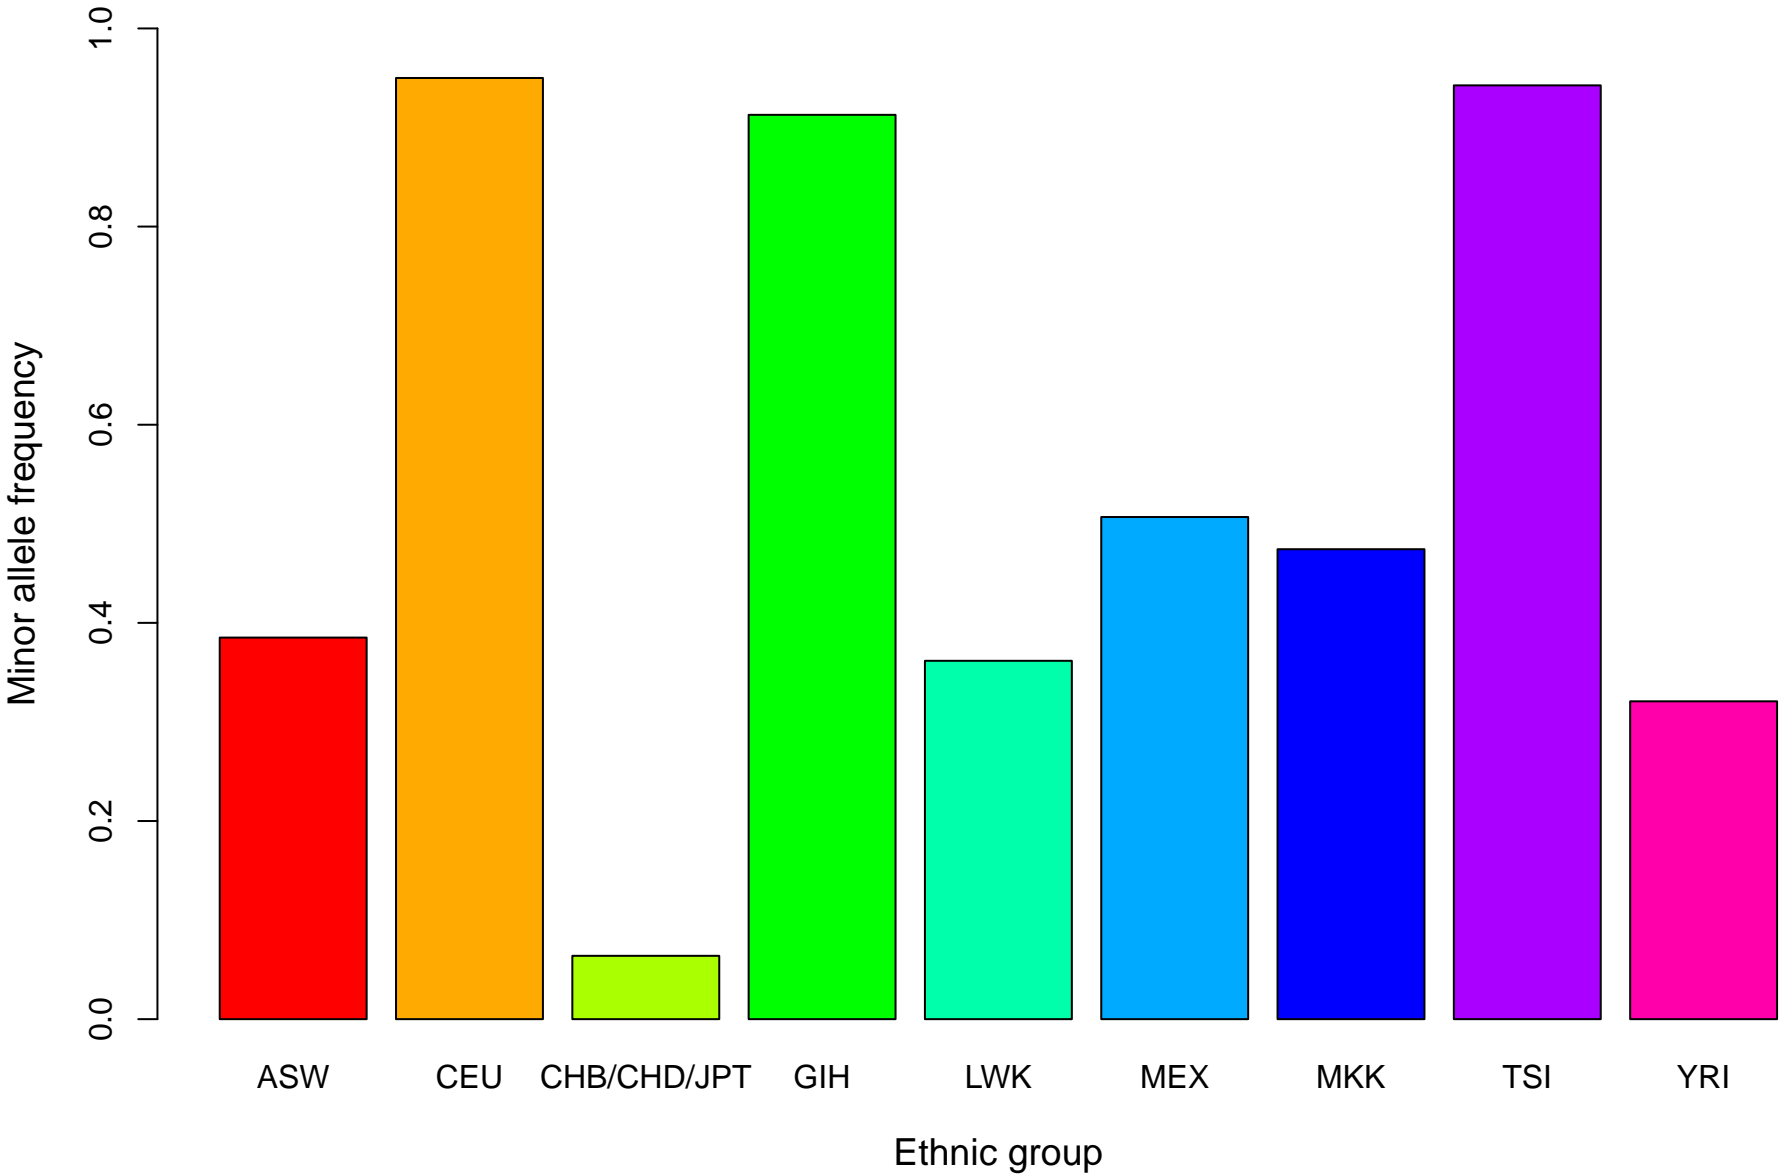

# rs6494466\_G

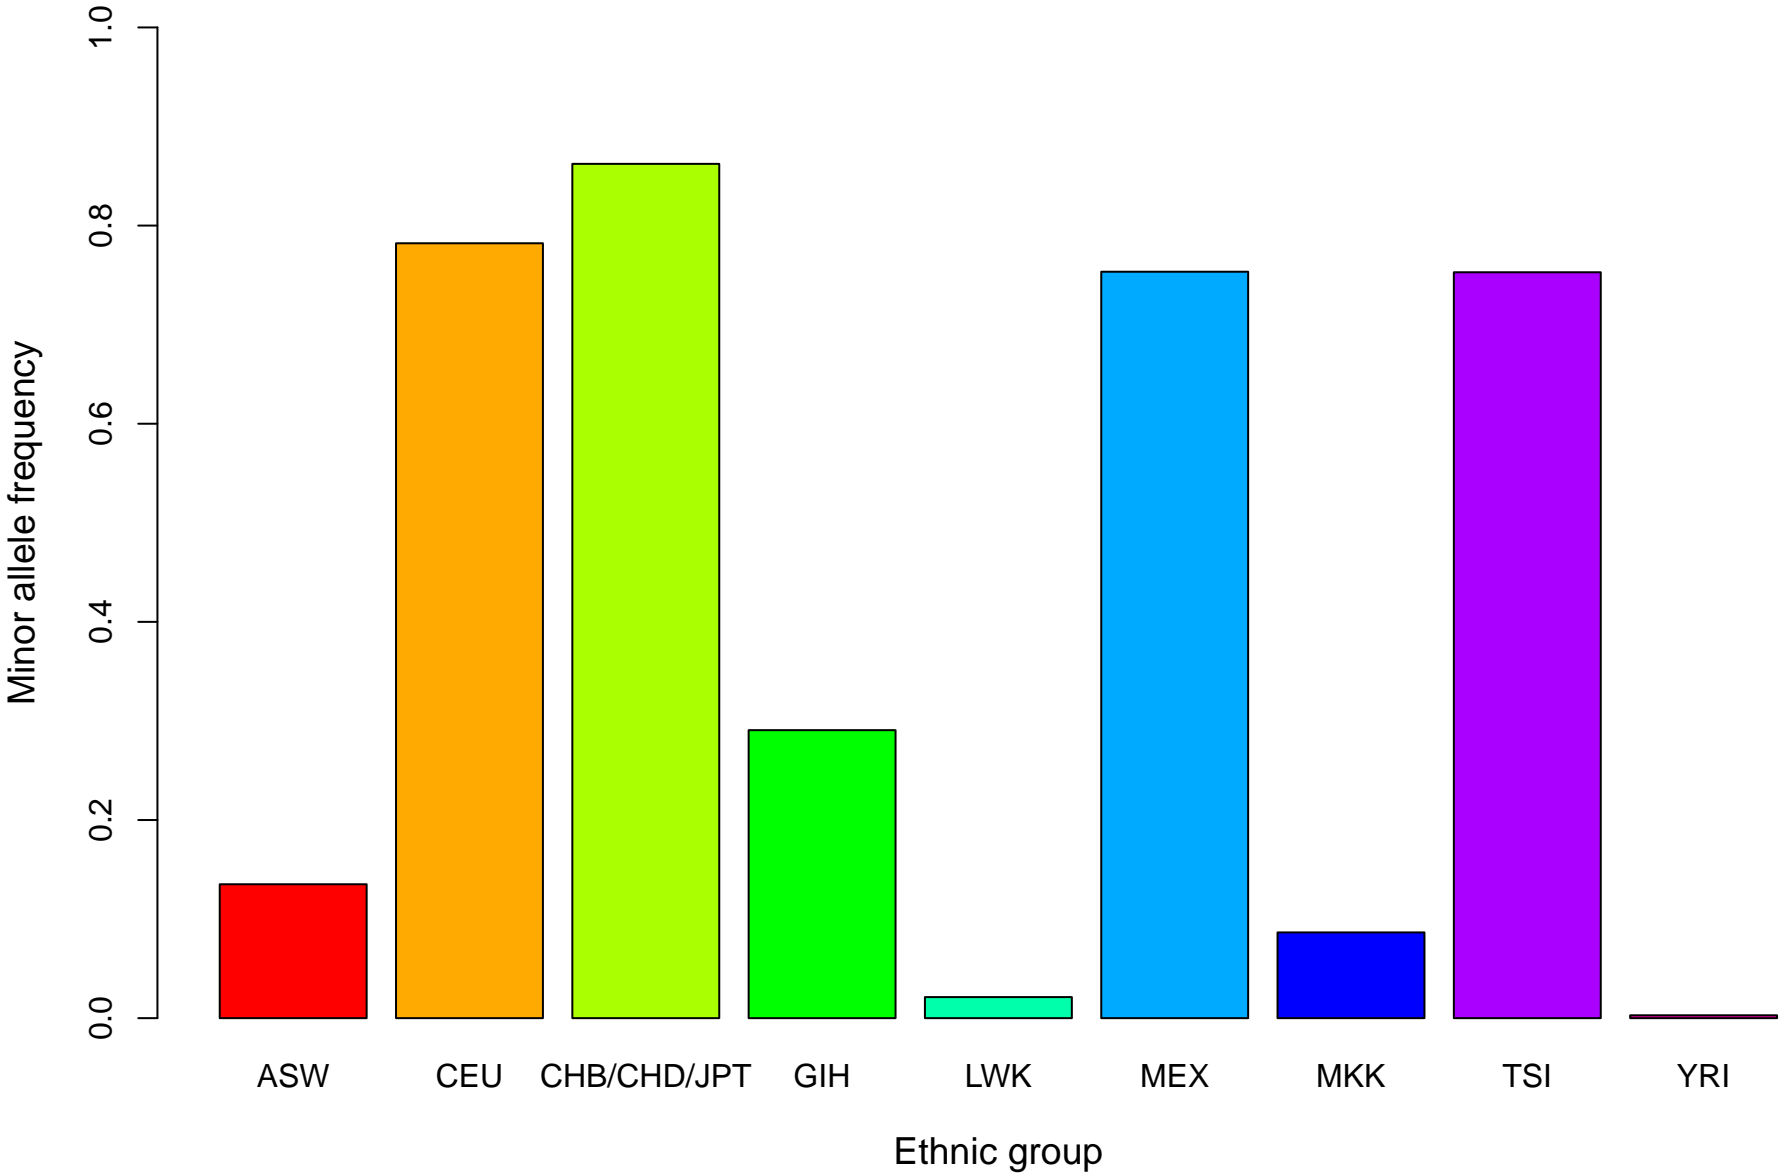

# rs1811510\_T

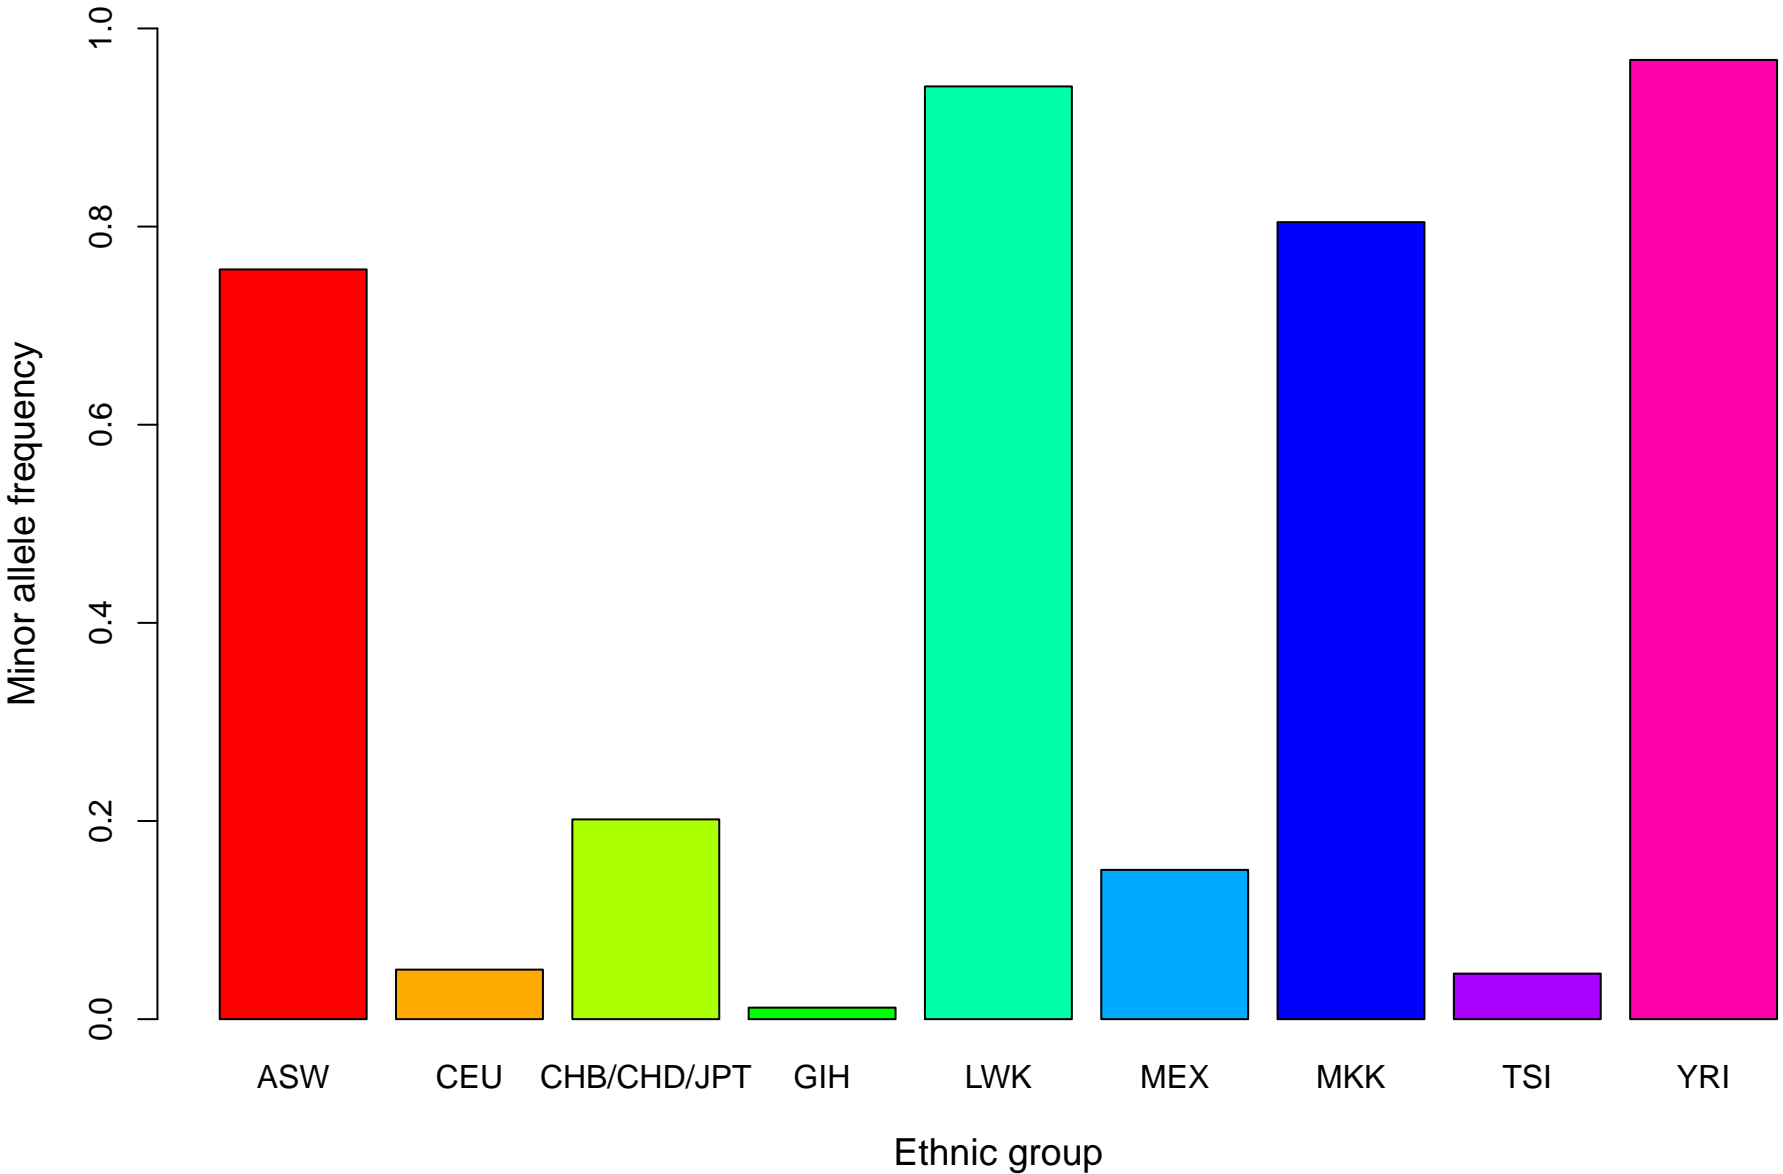

# rs7292014\_G

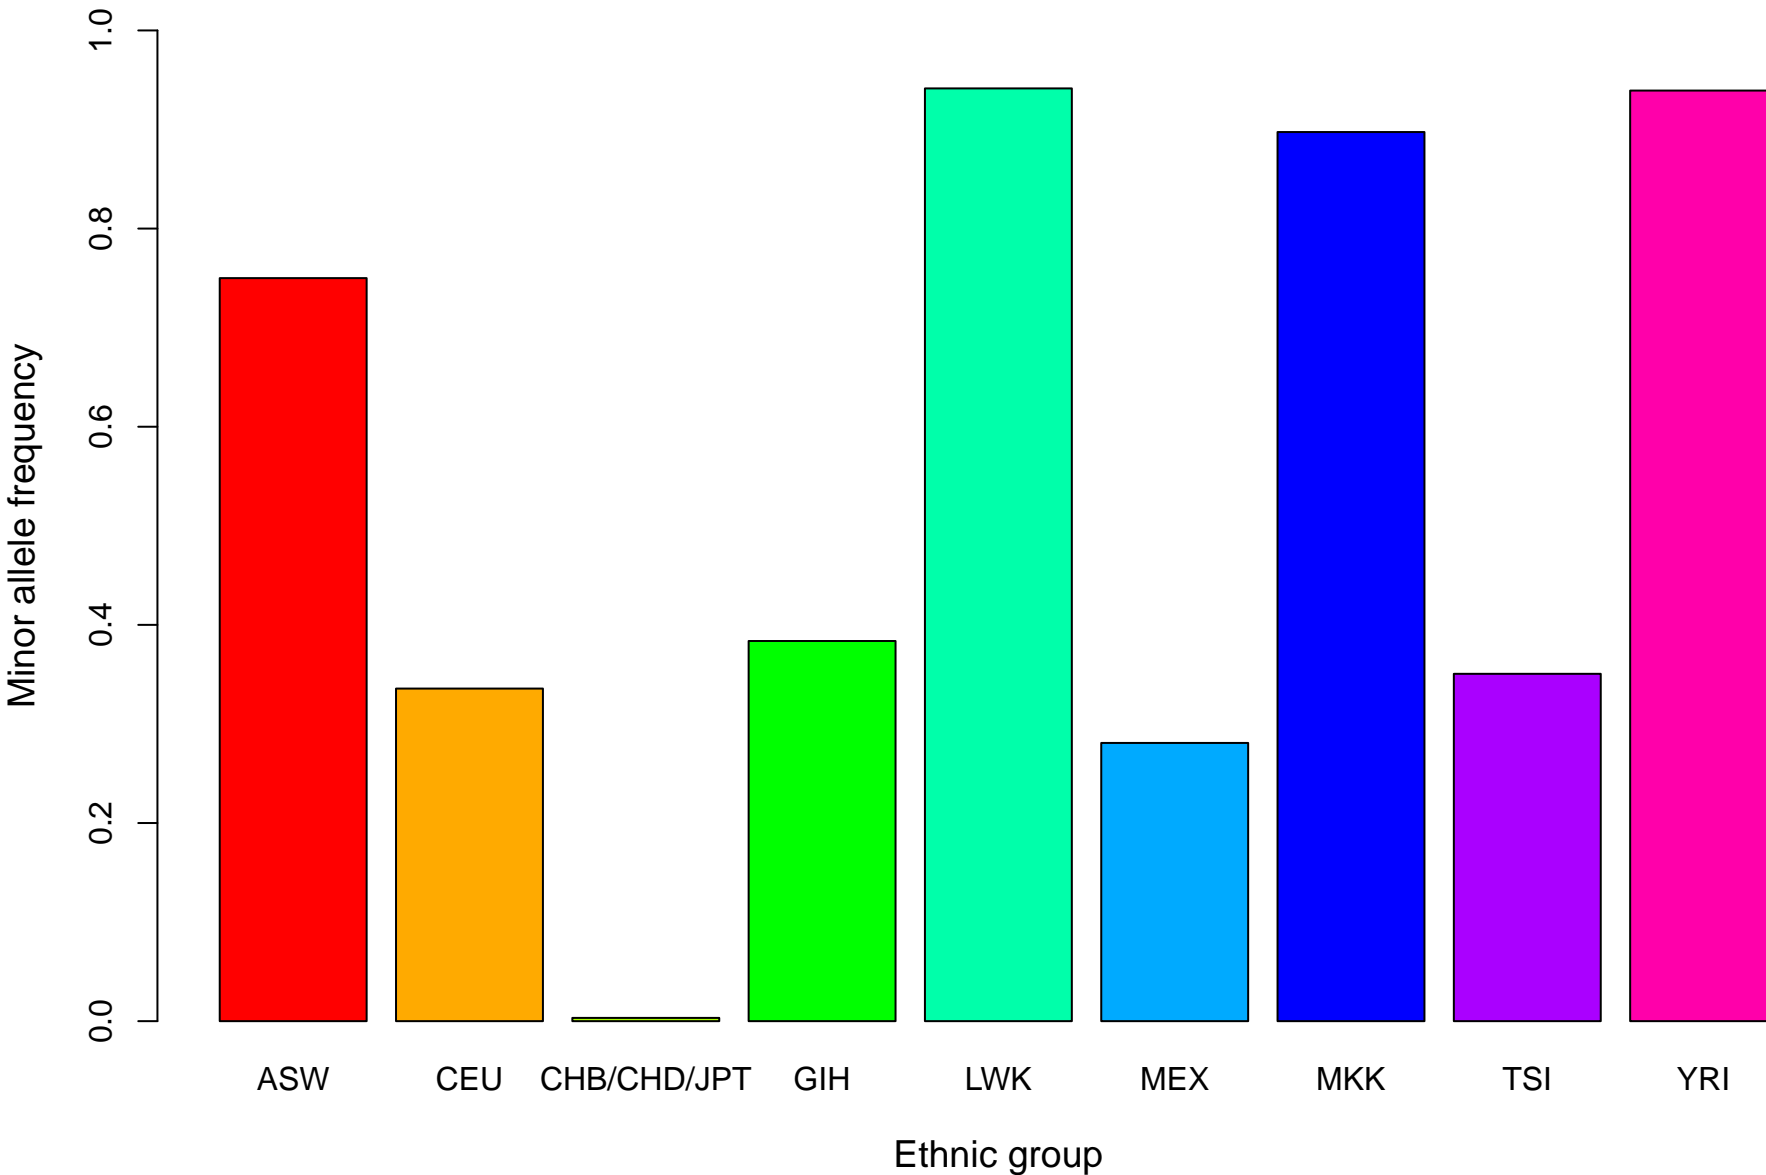

# rs2675345\_A

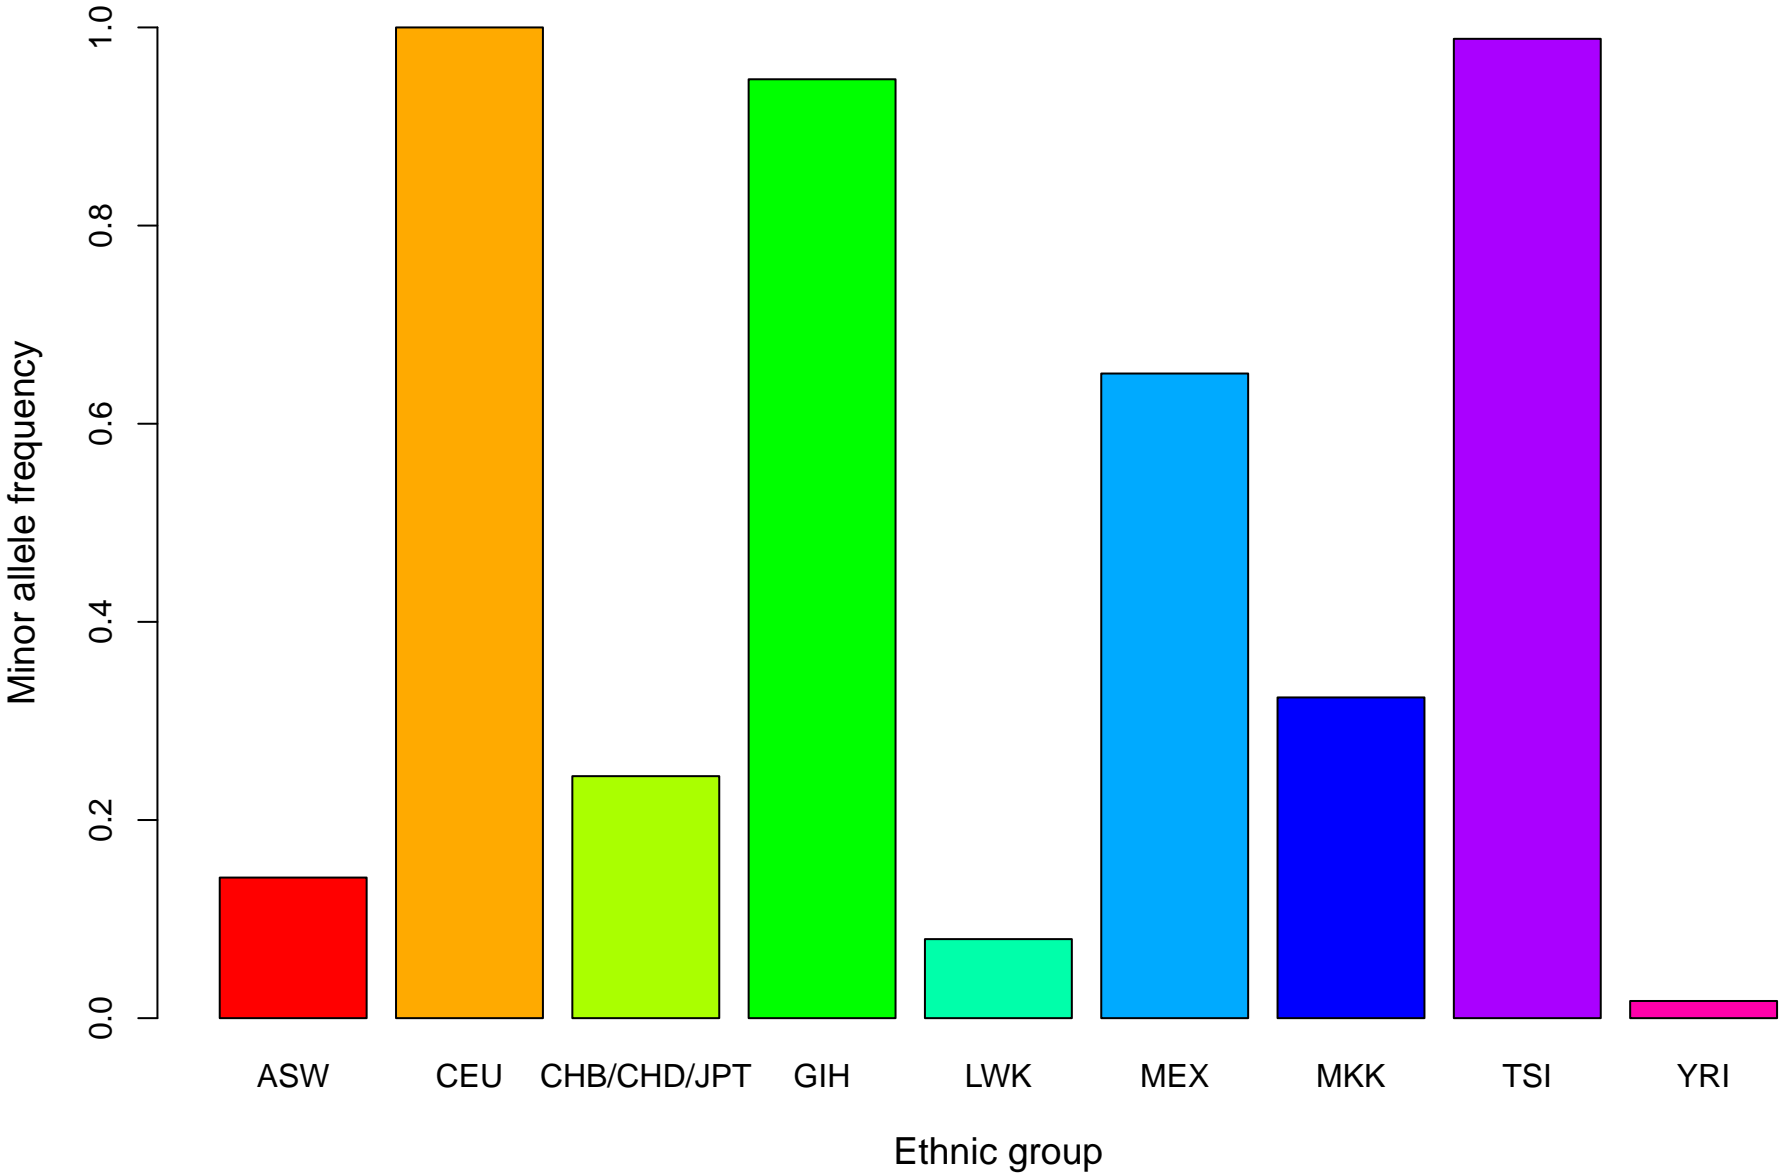

# rs13266020\_T

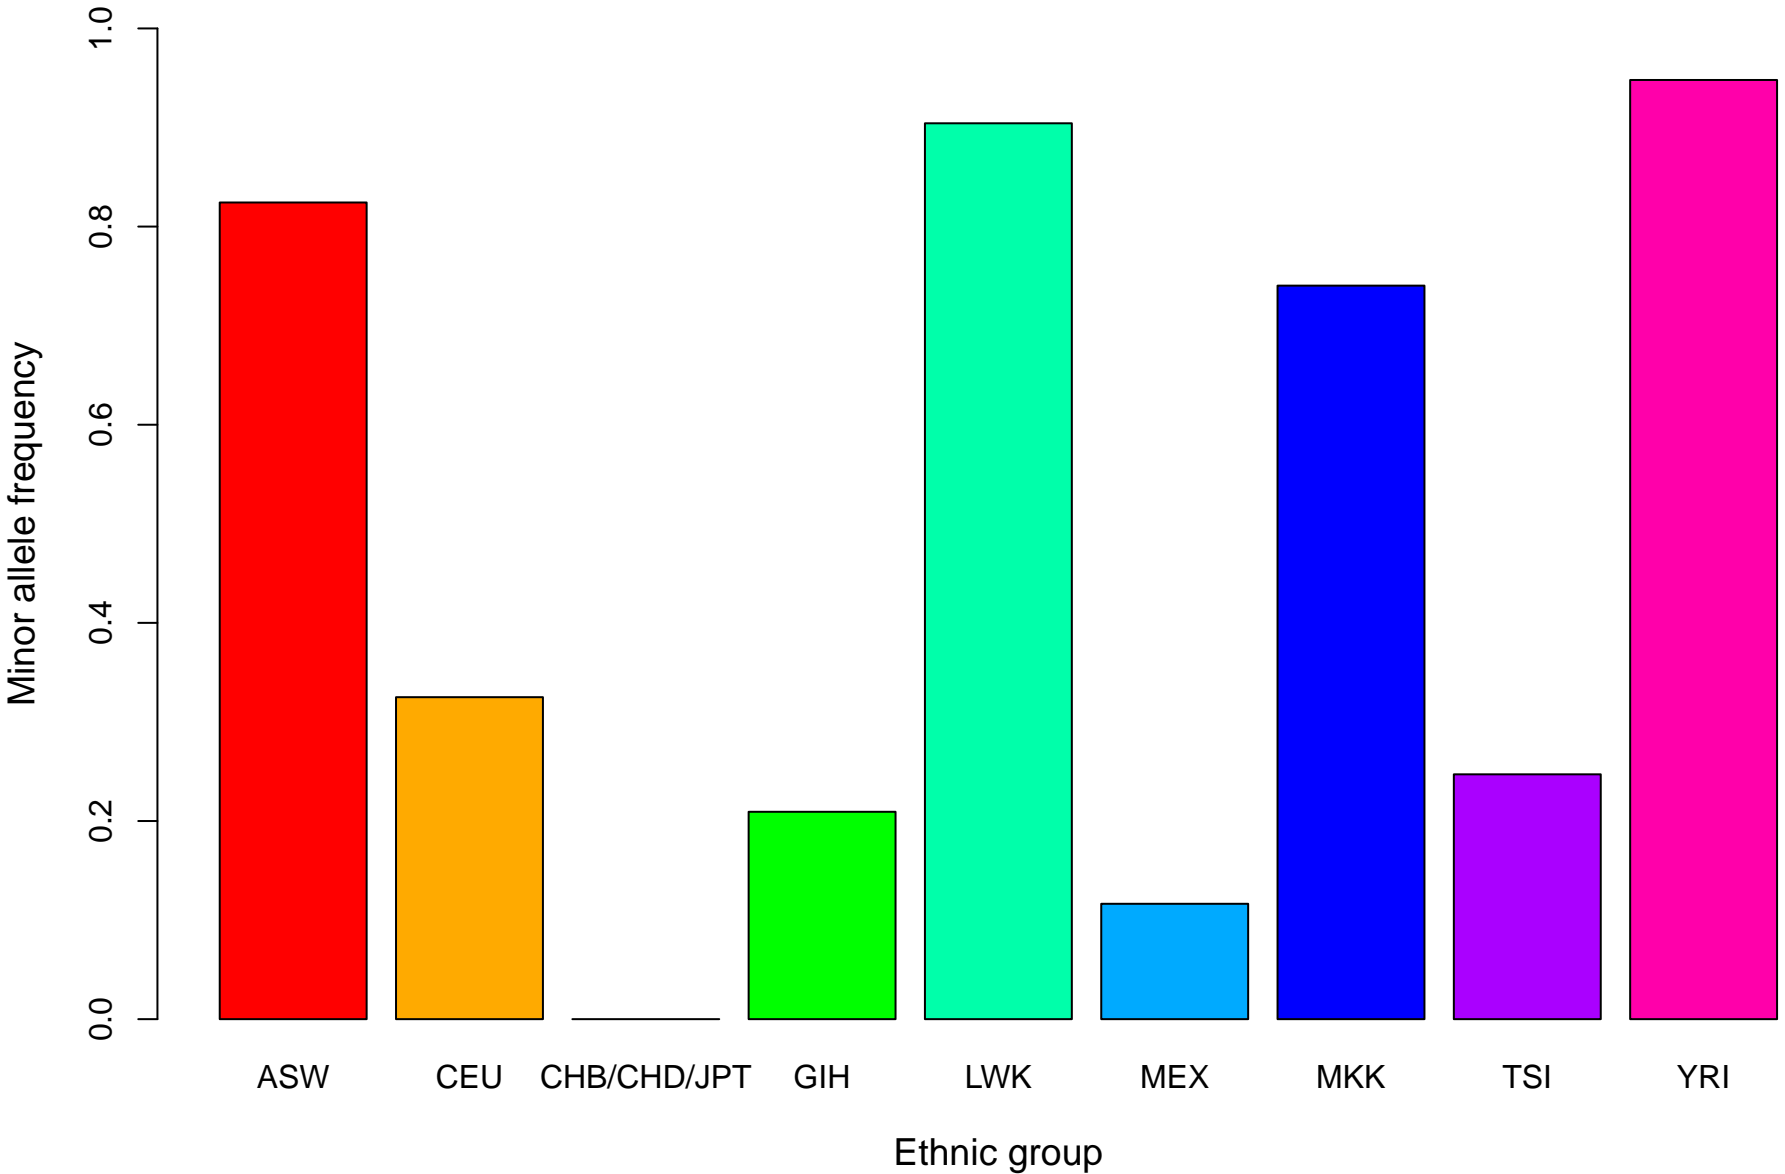



# rs12313915\_T

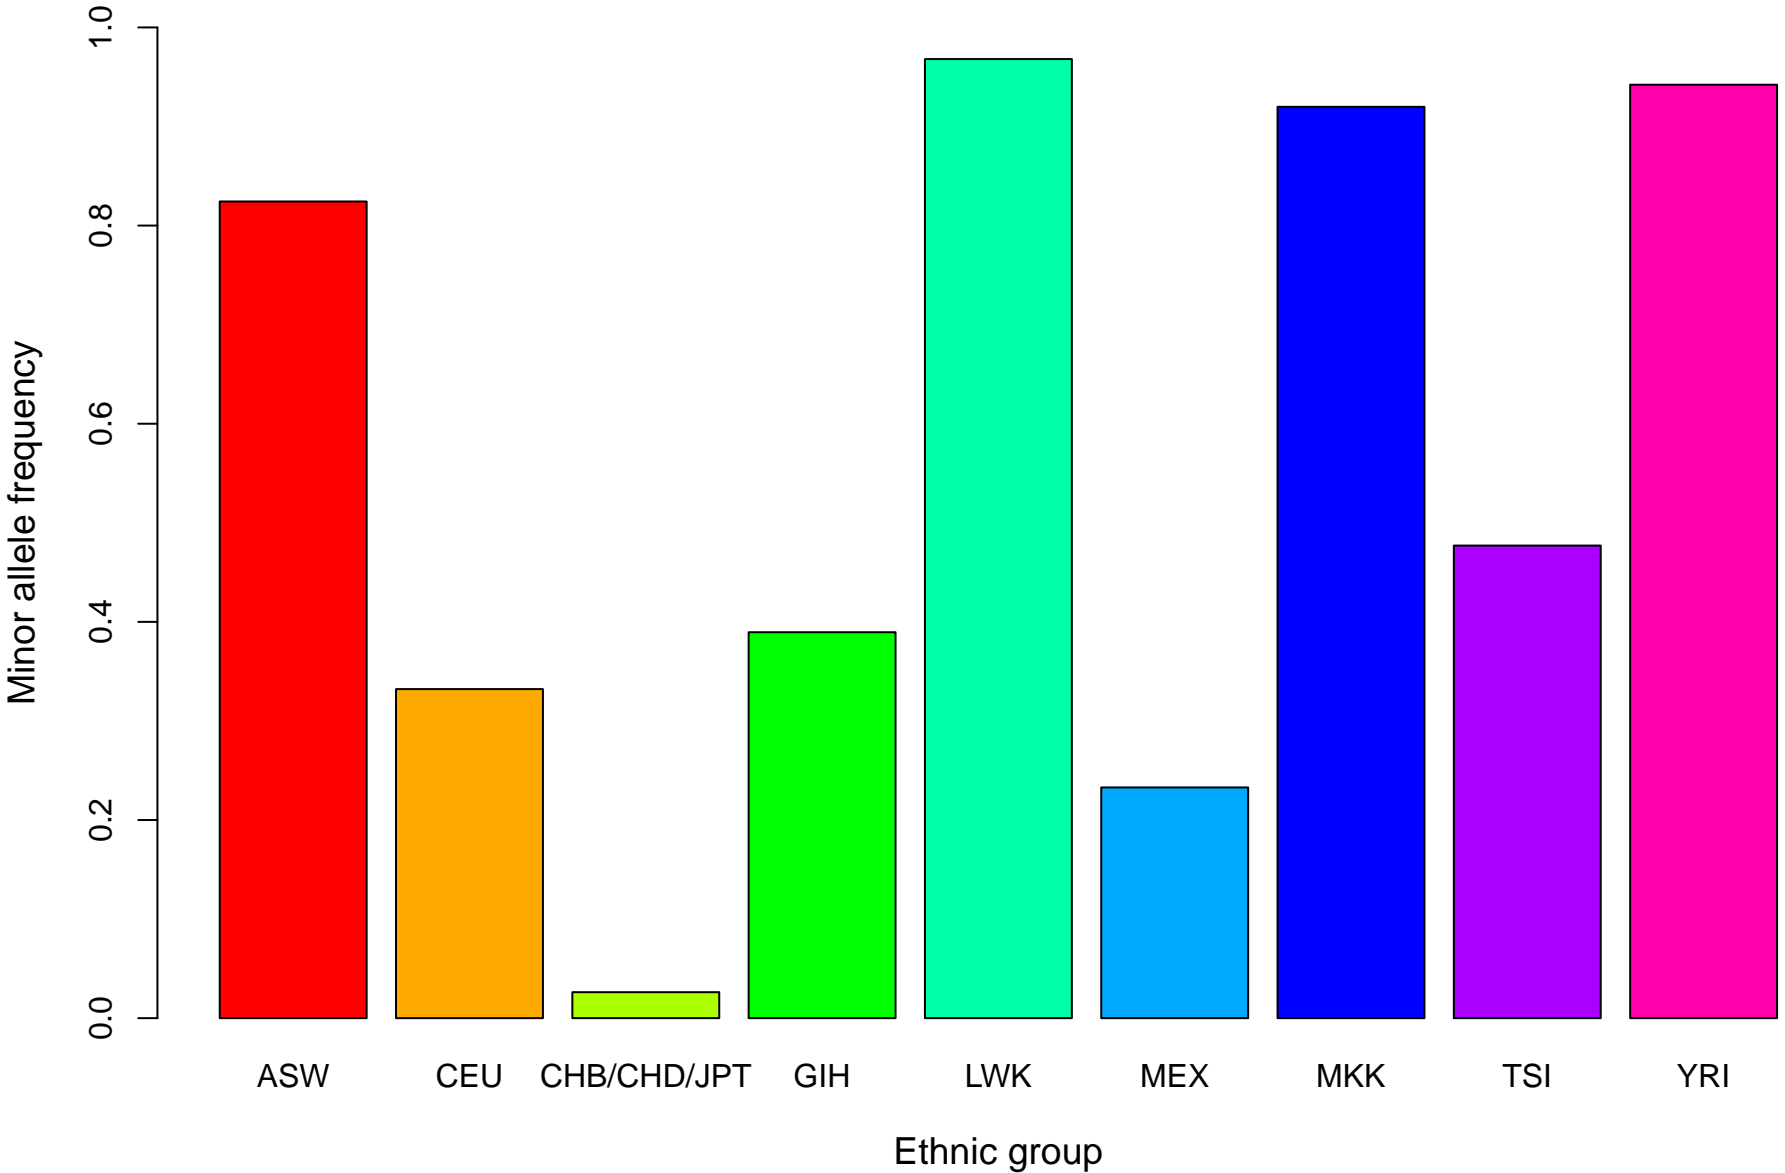

# rs13006497\_G

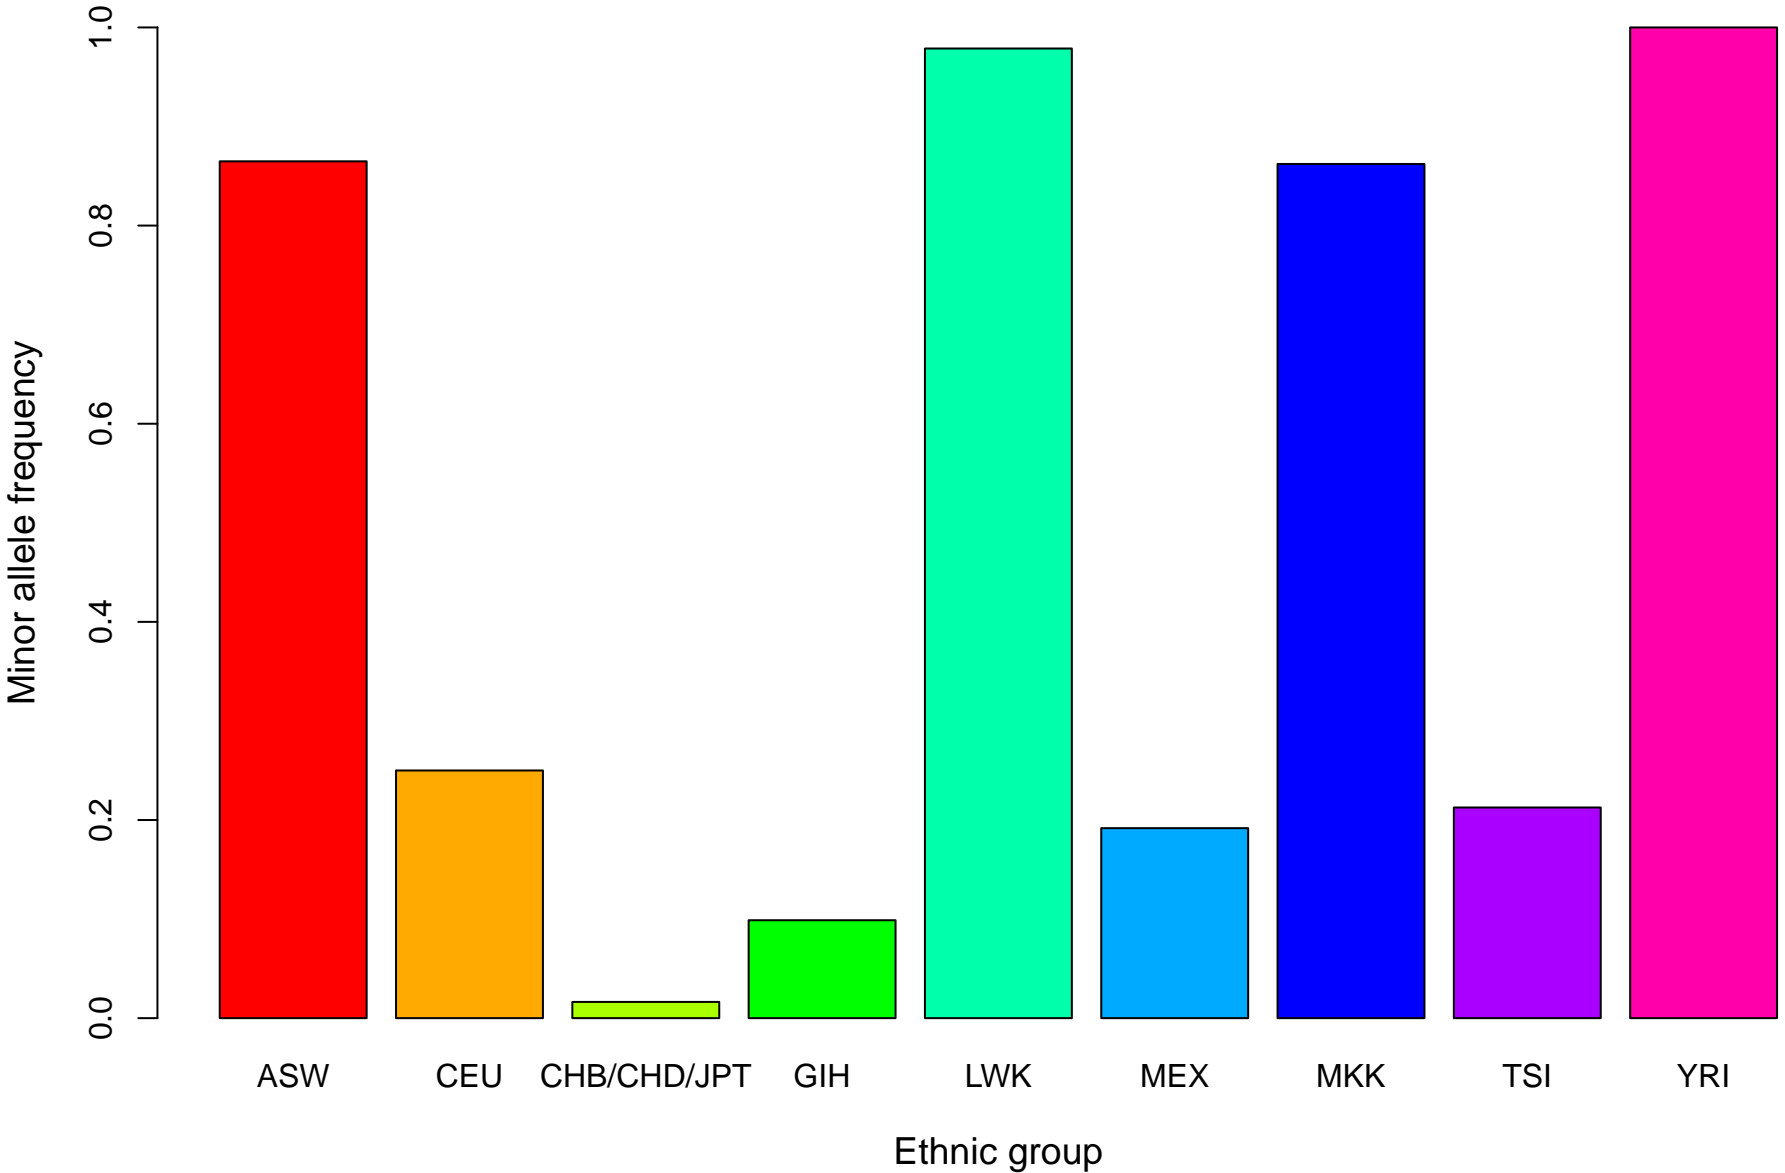

# rs6886518\_G

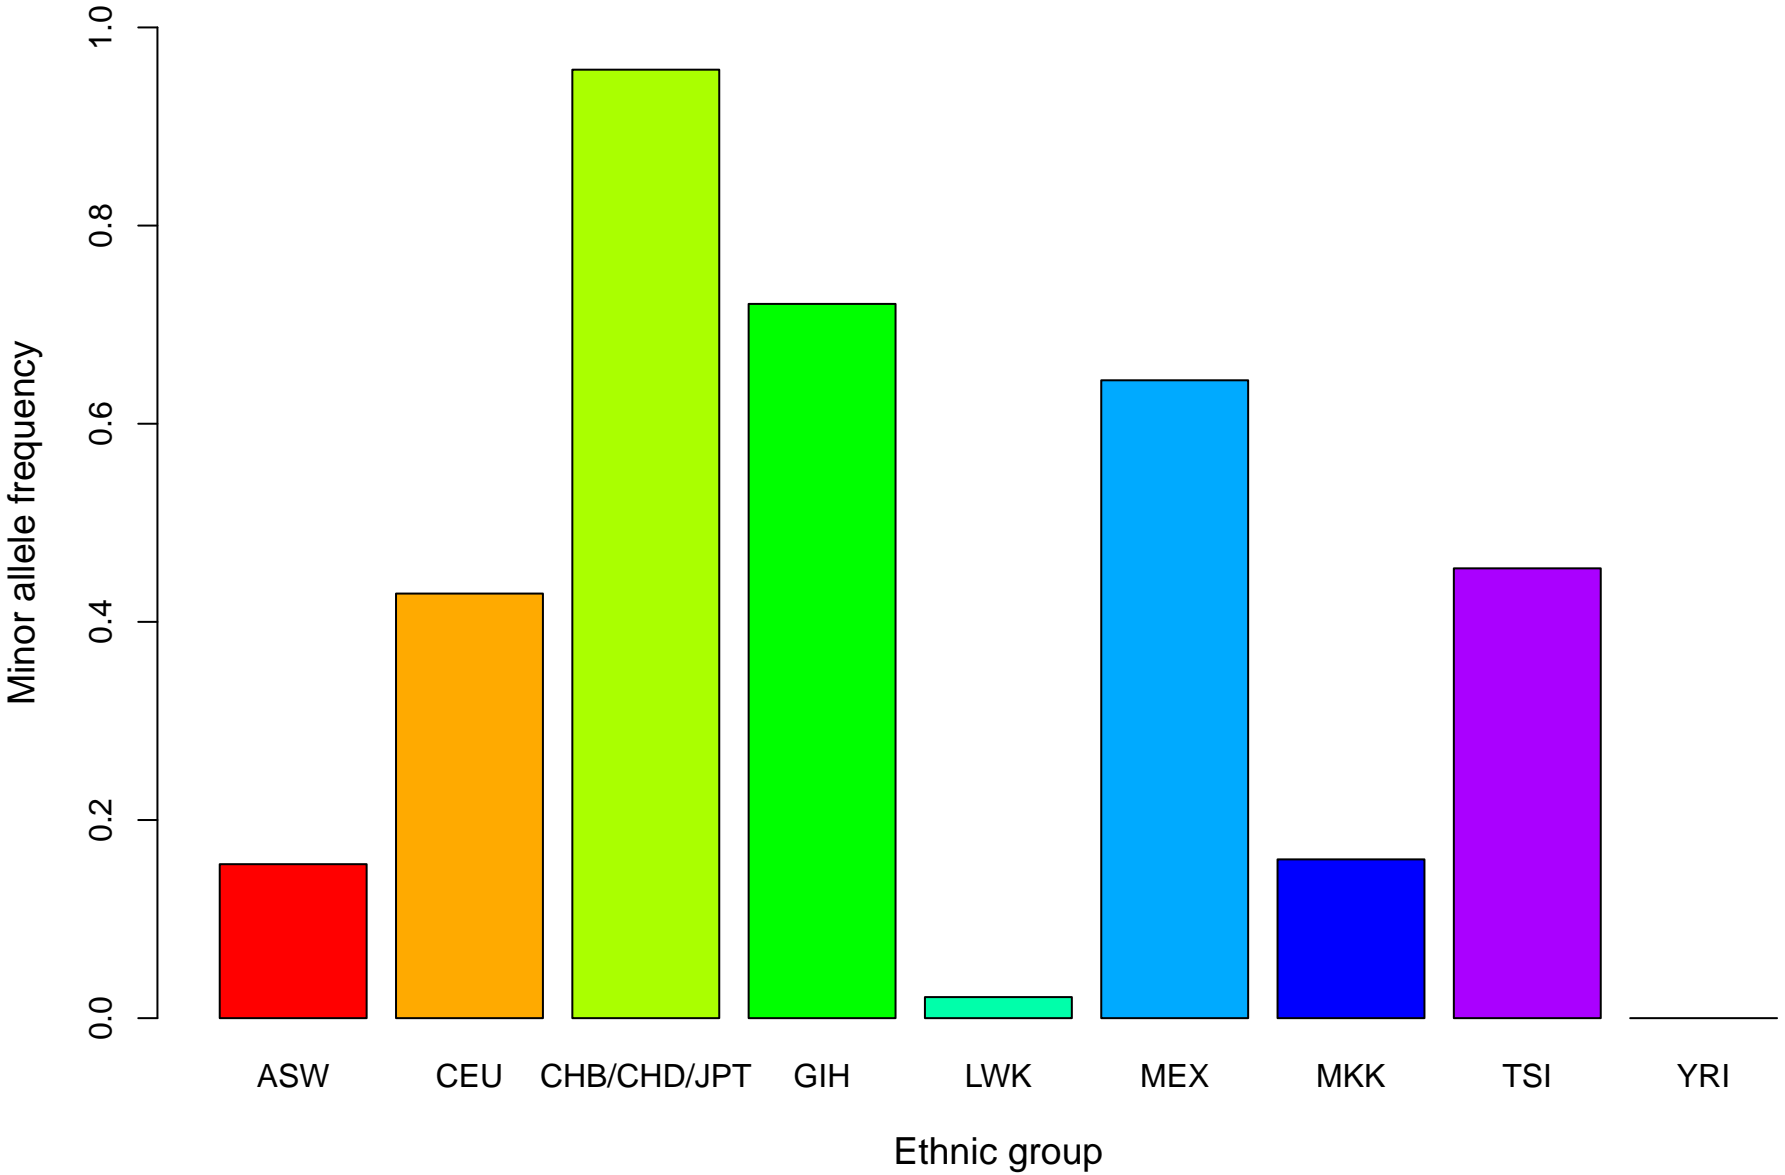

# rs12440301\_A

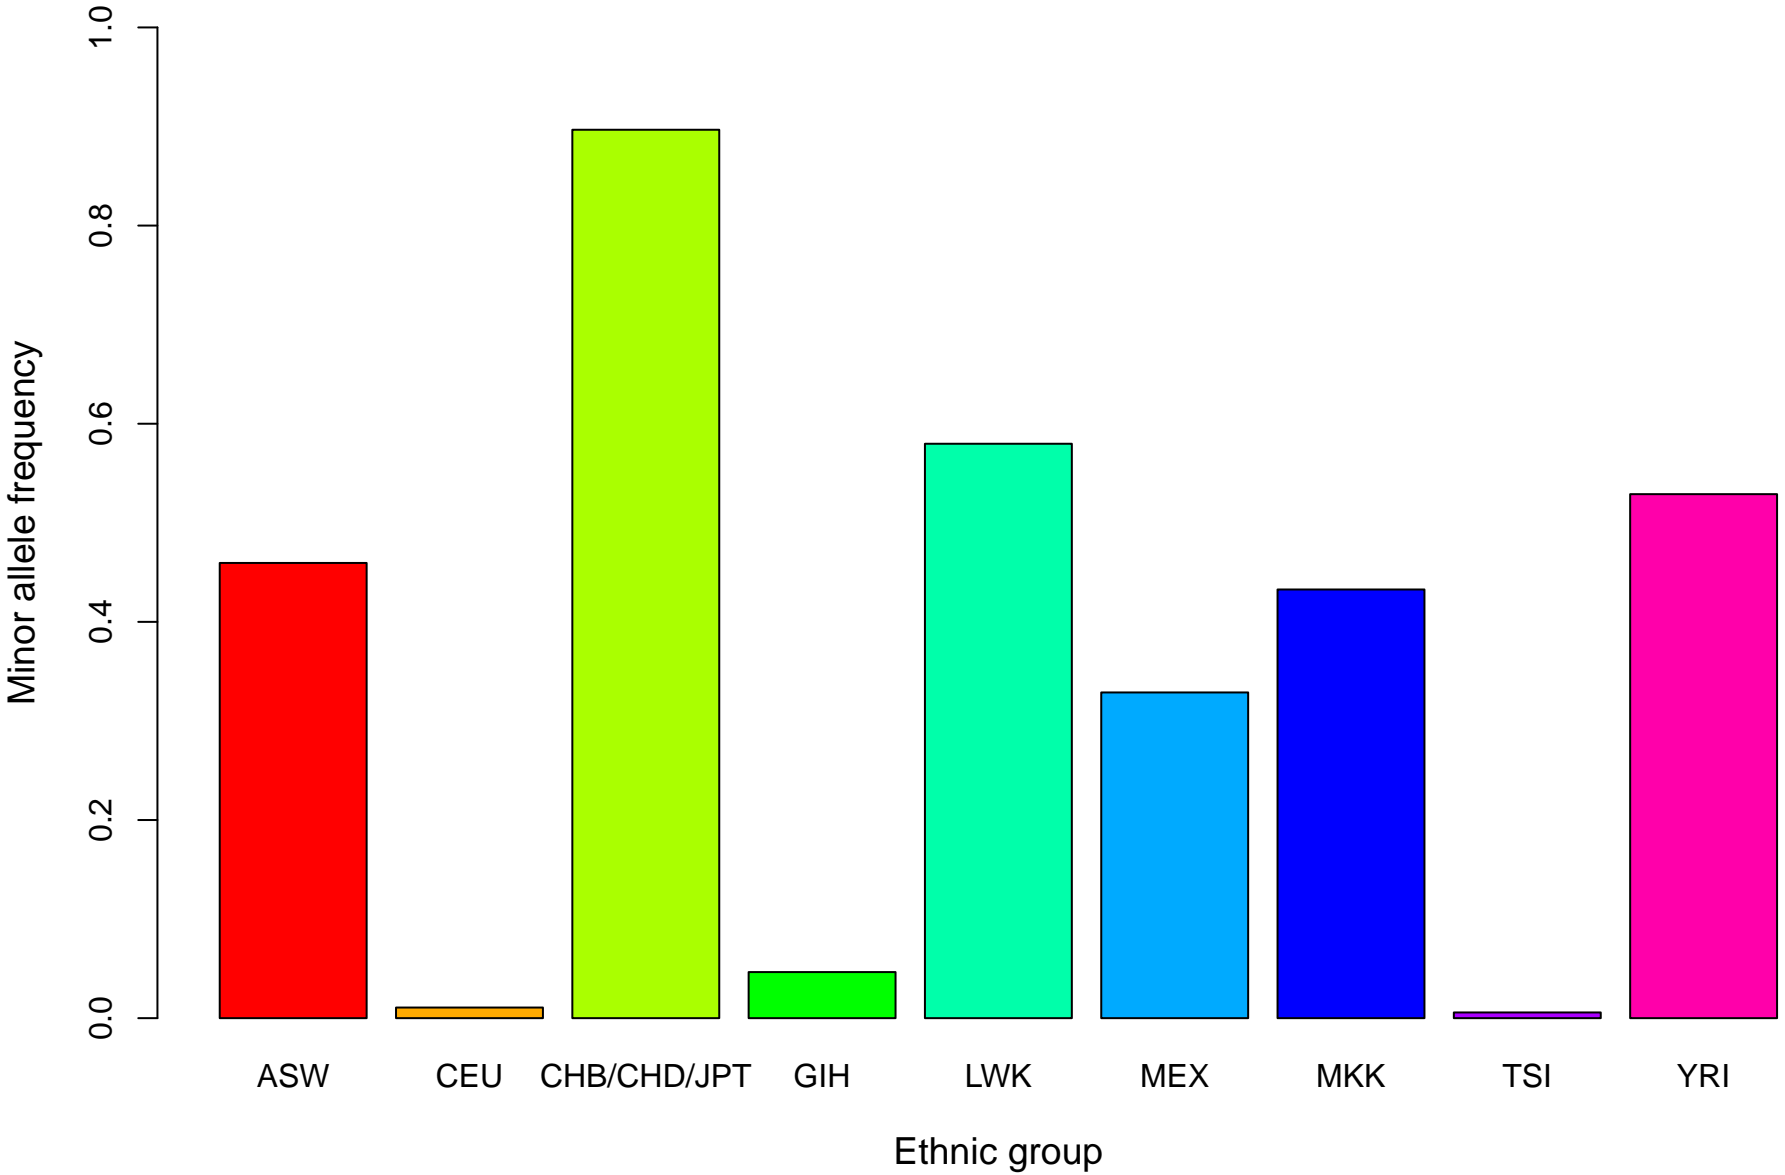

# rs967377\_C

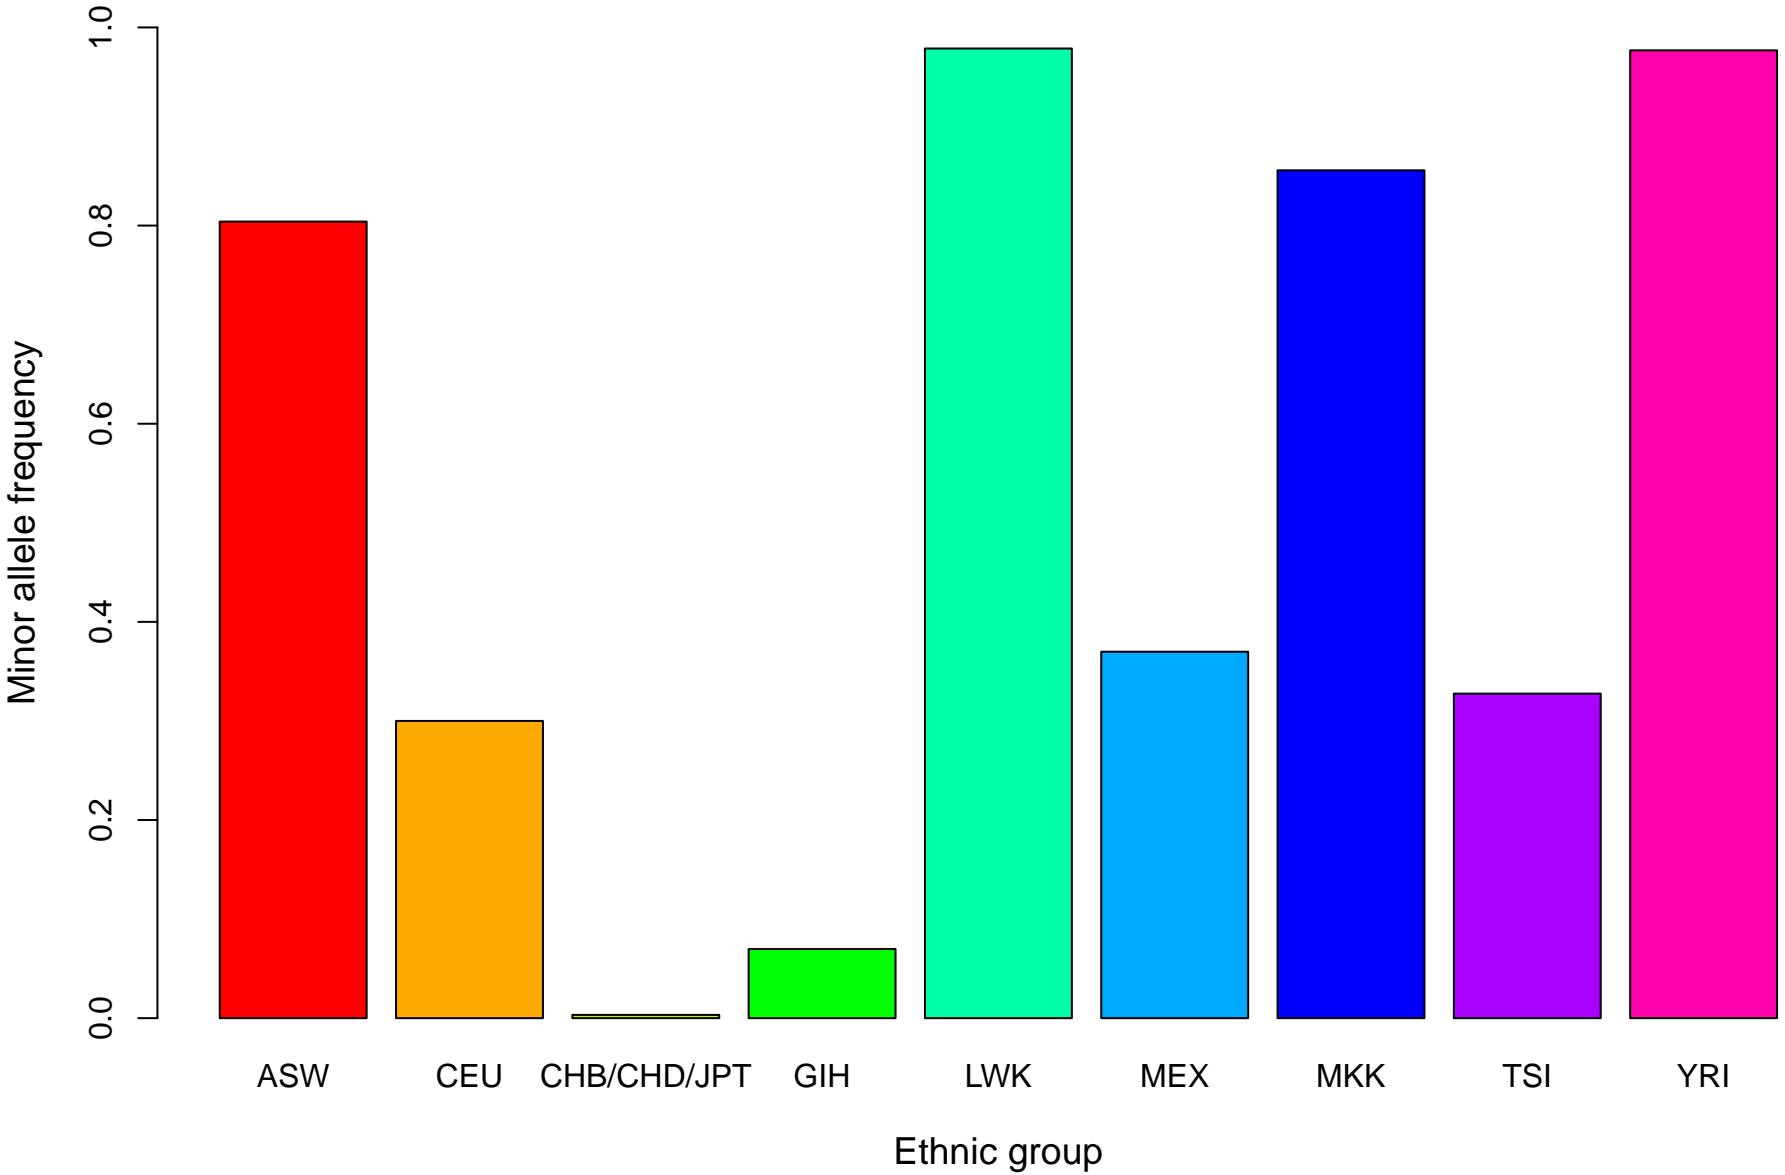

# rs835574\_T

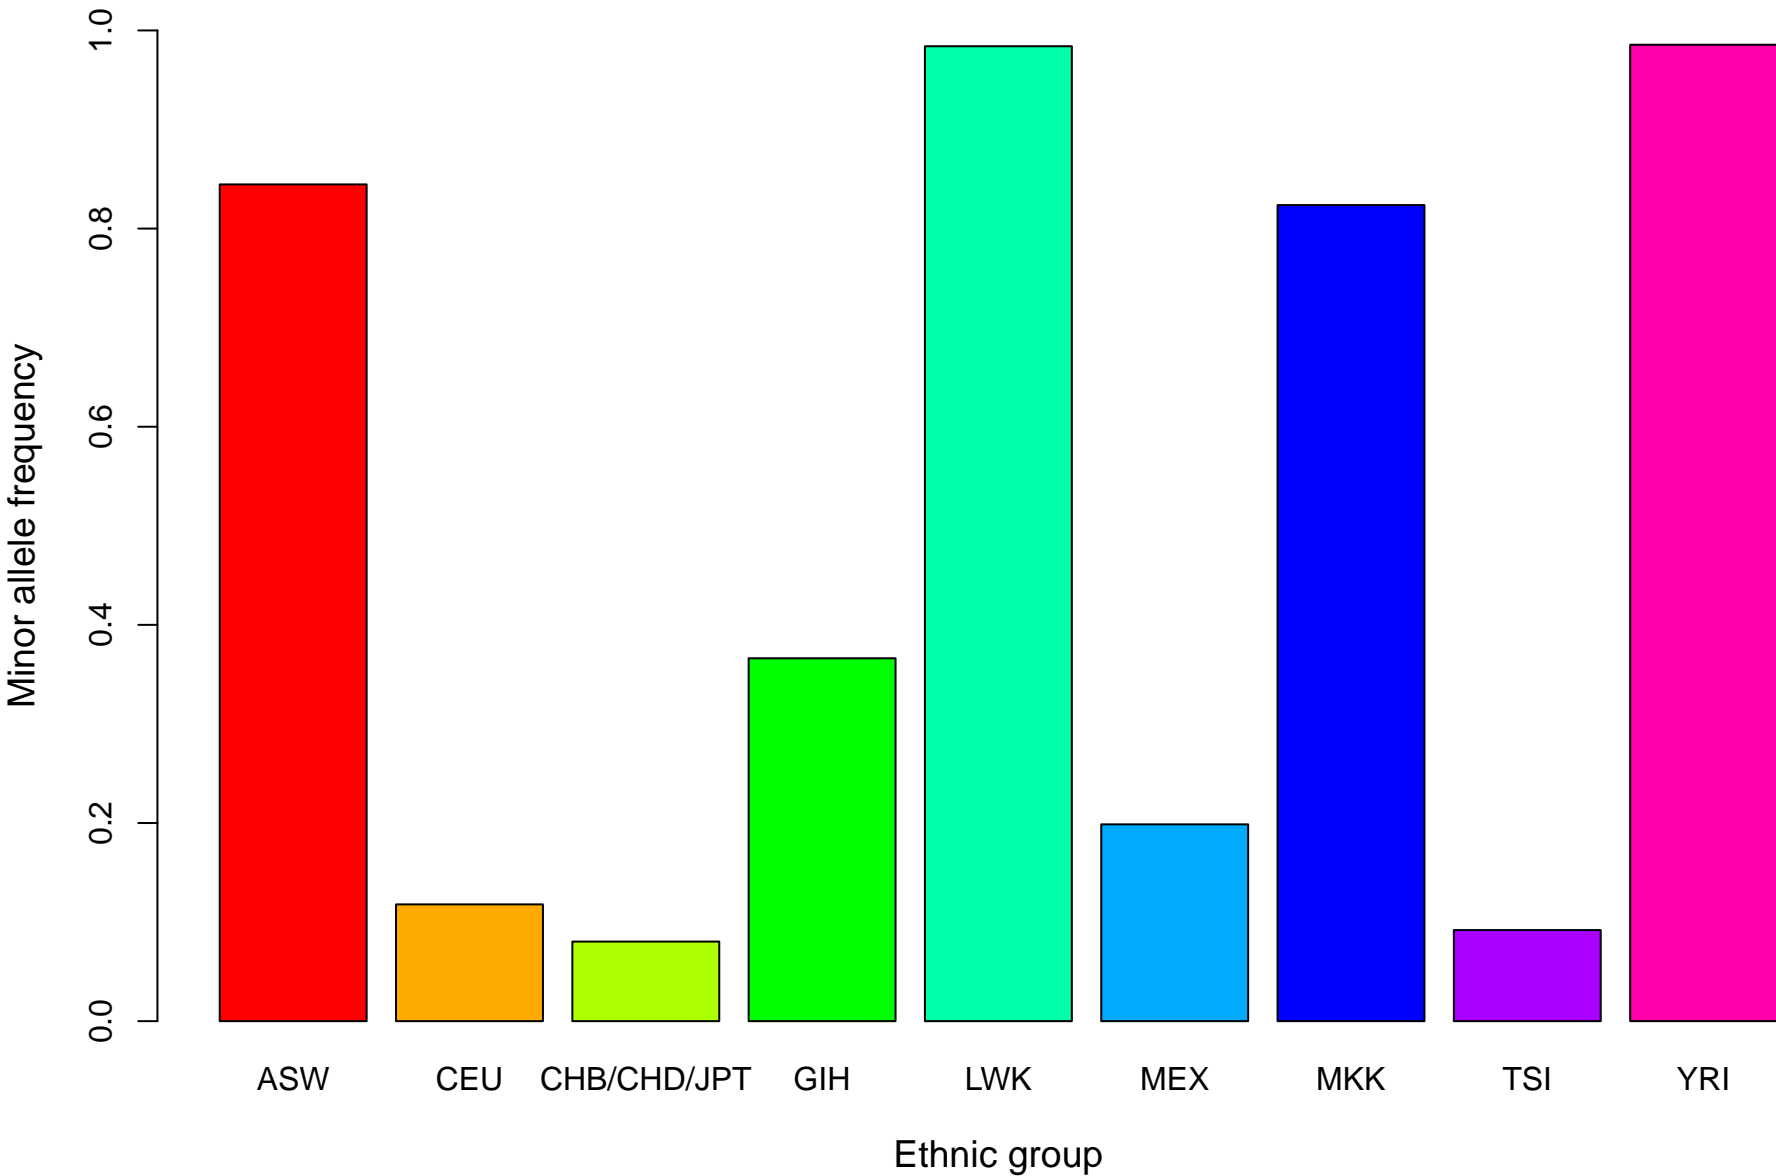

# rs2700371\_G

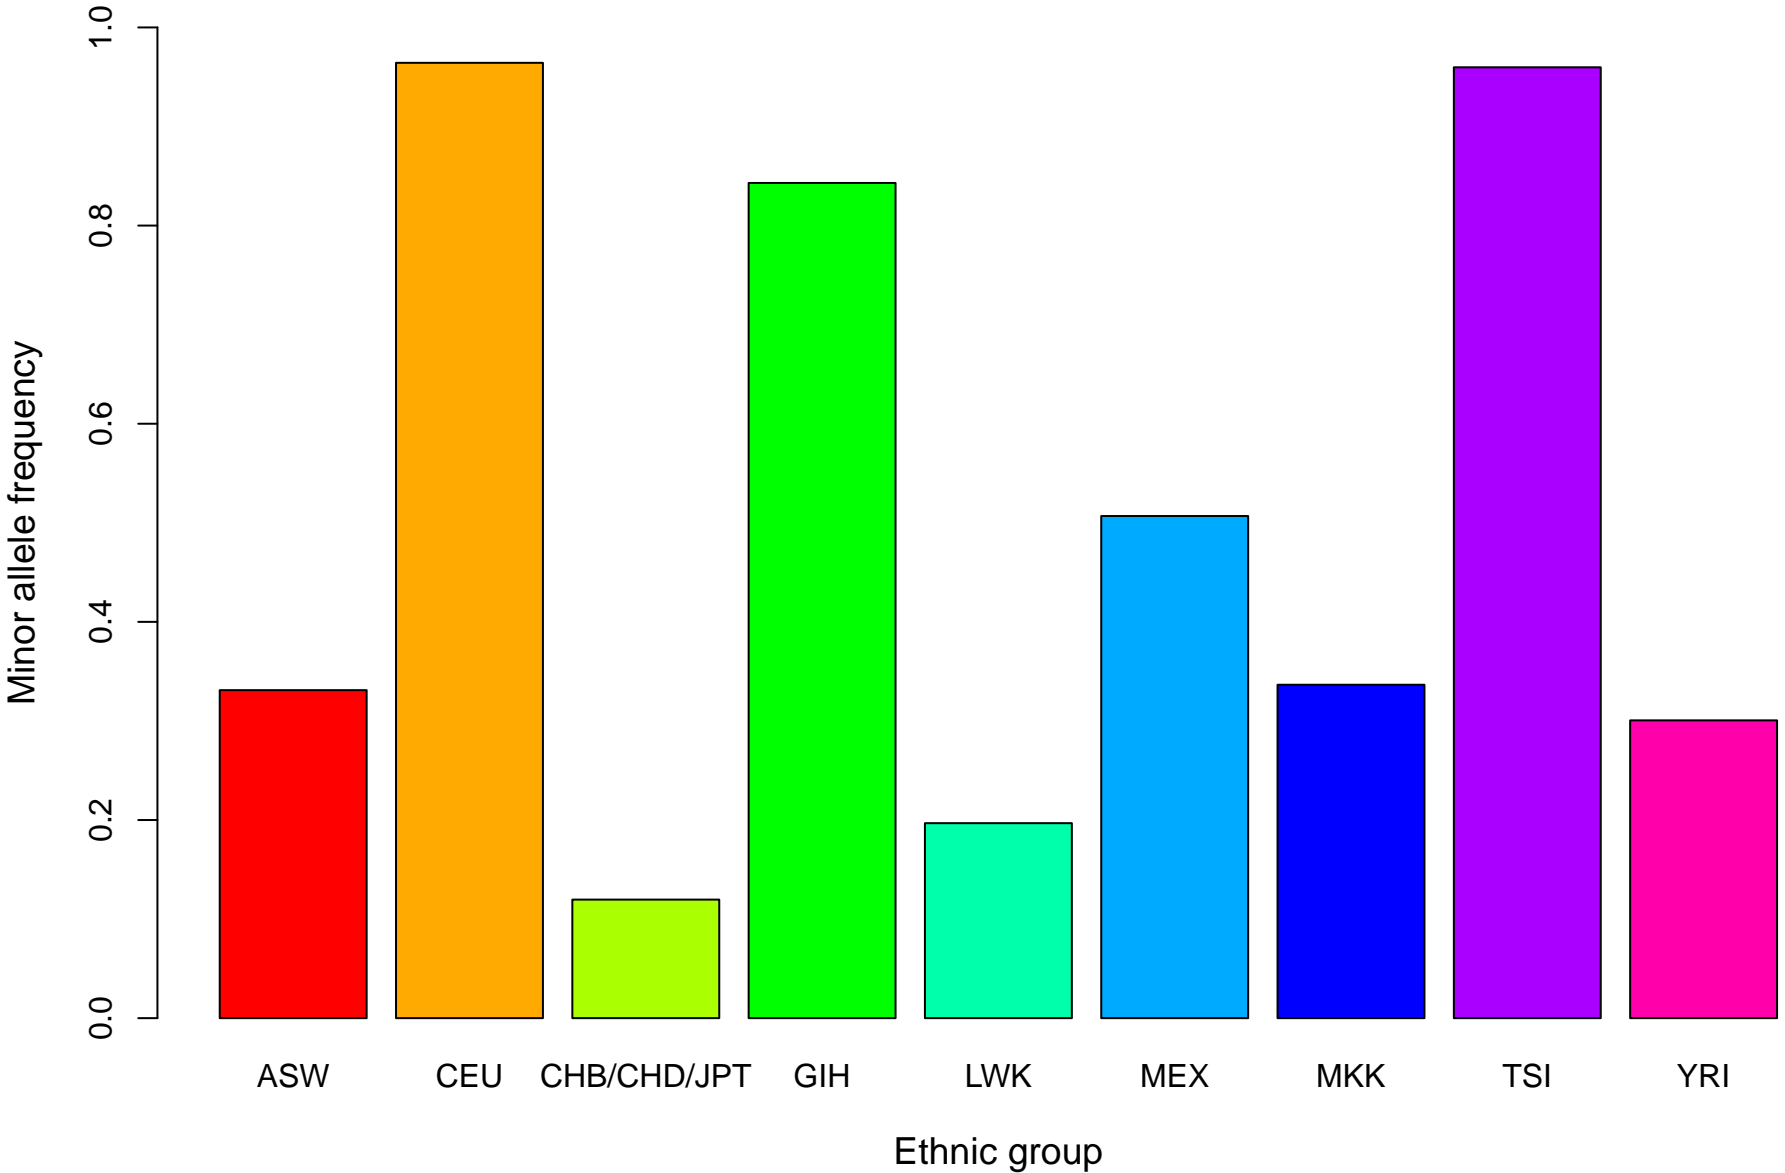

# rs4280128\_A

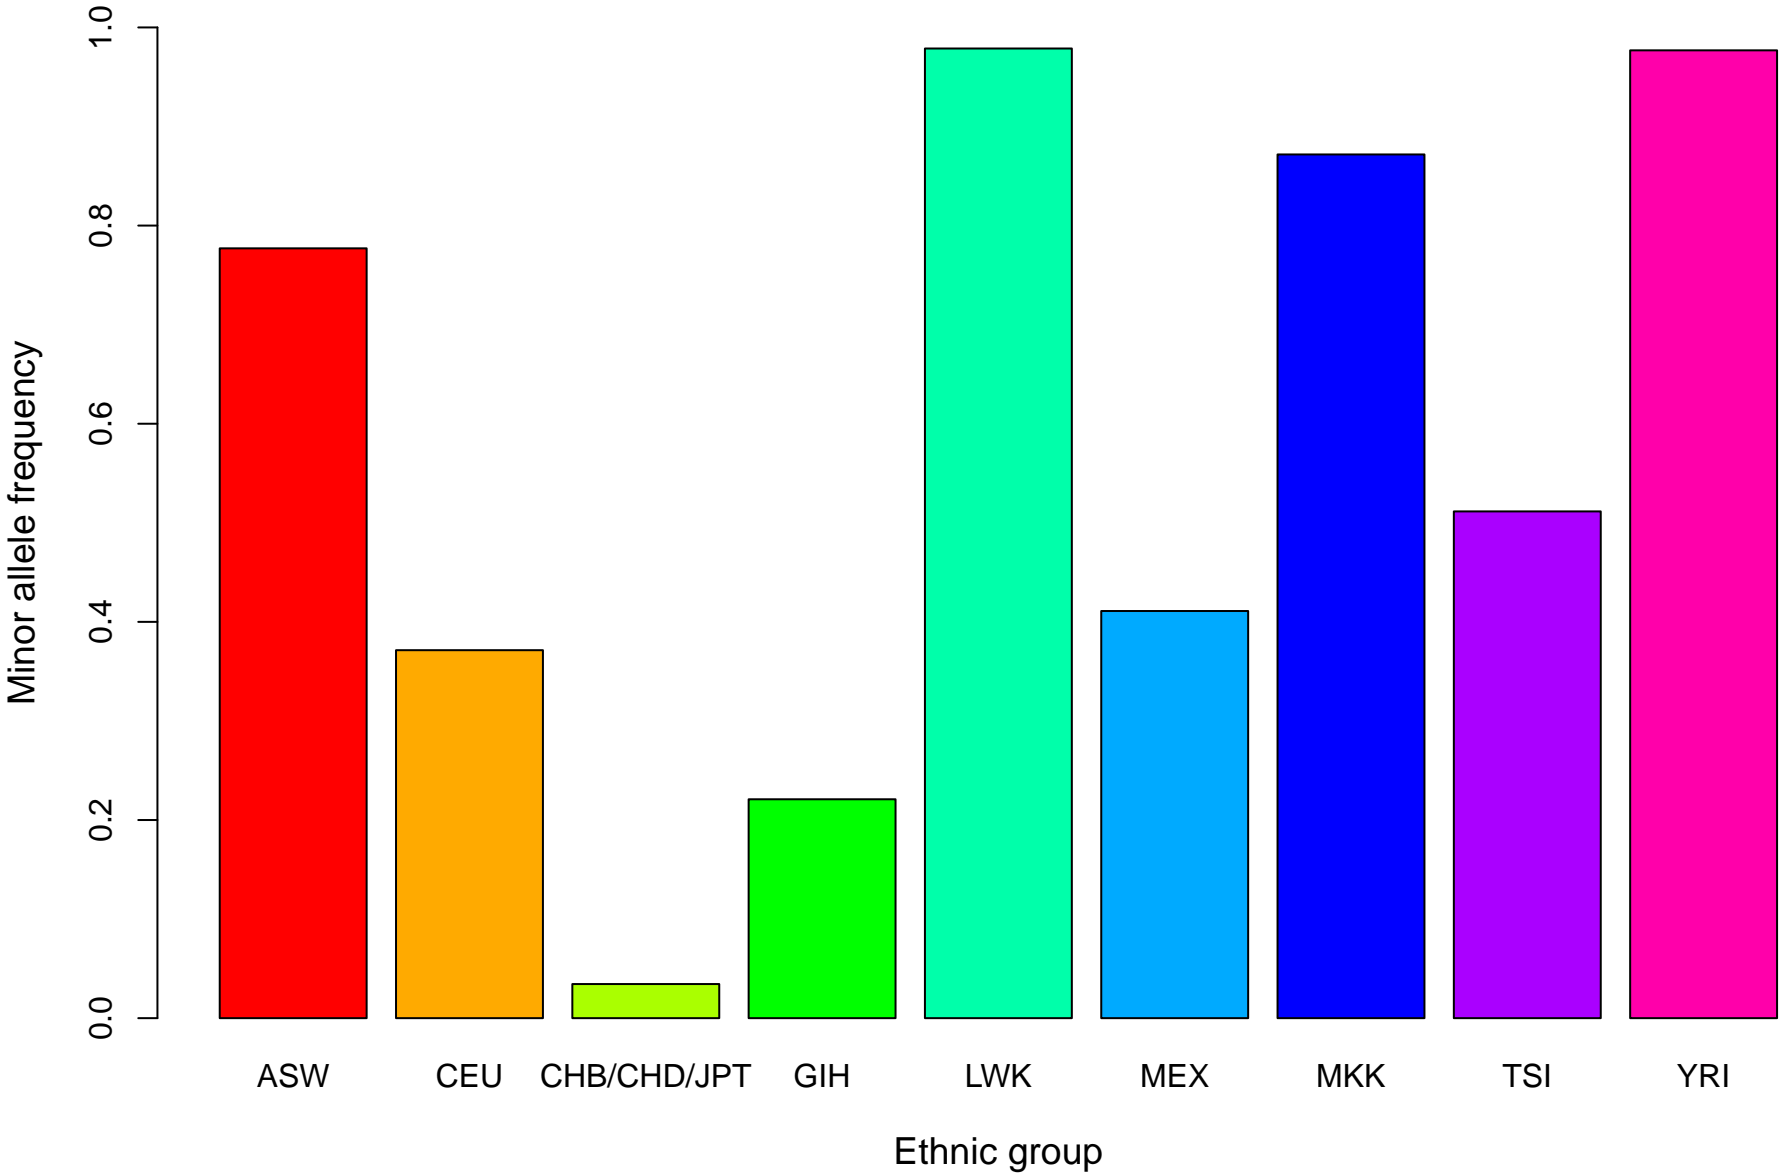



# rs2814778\_C

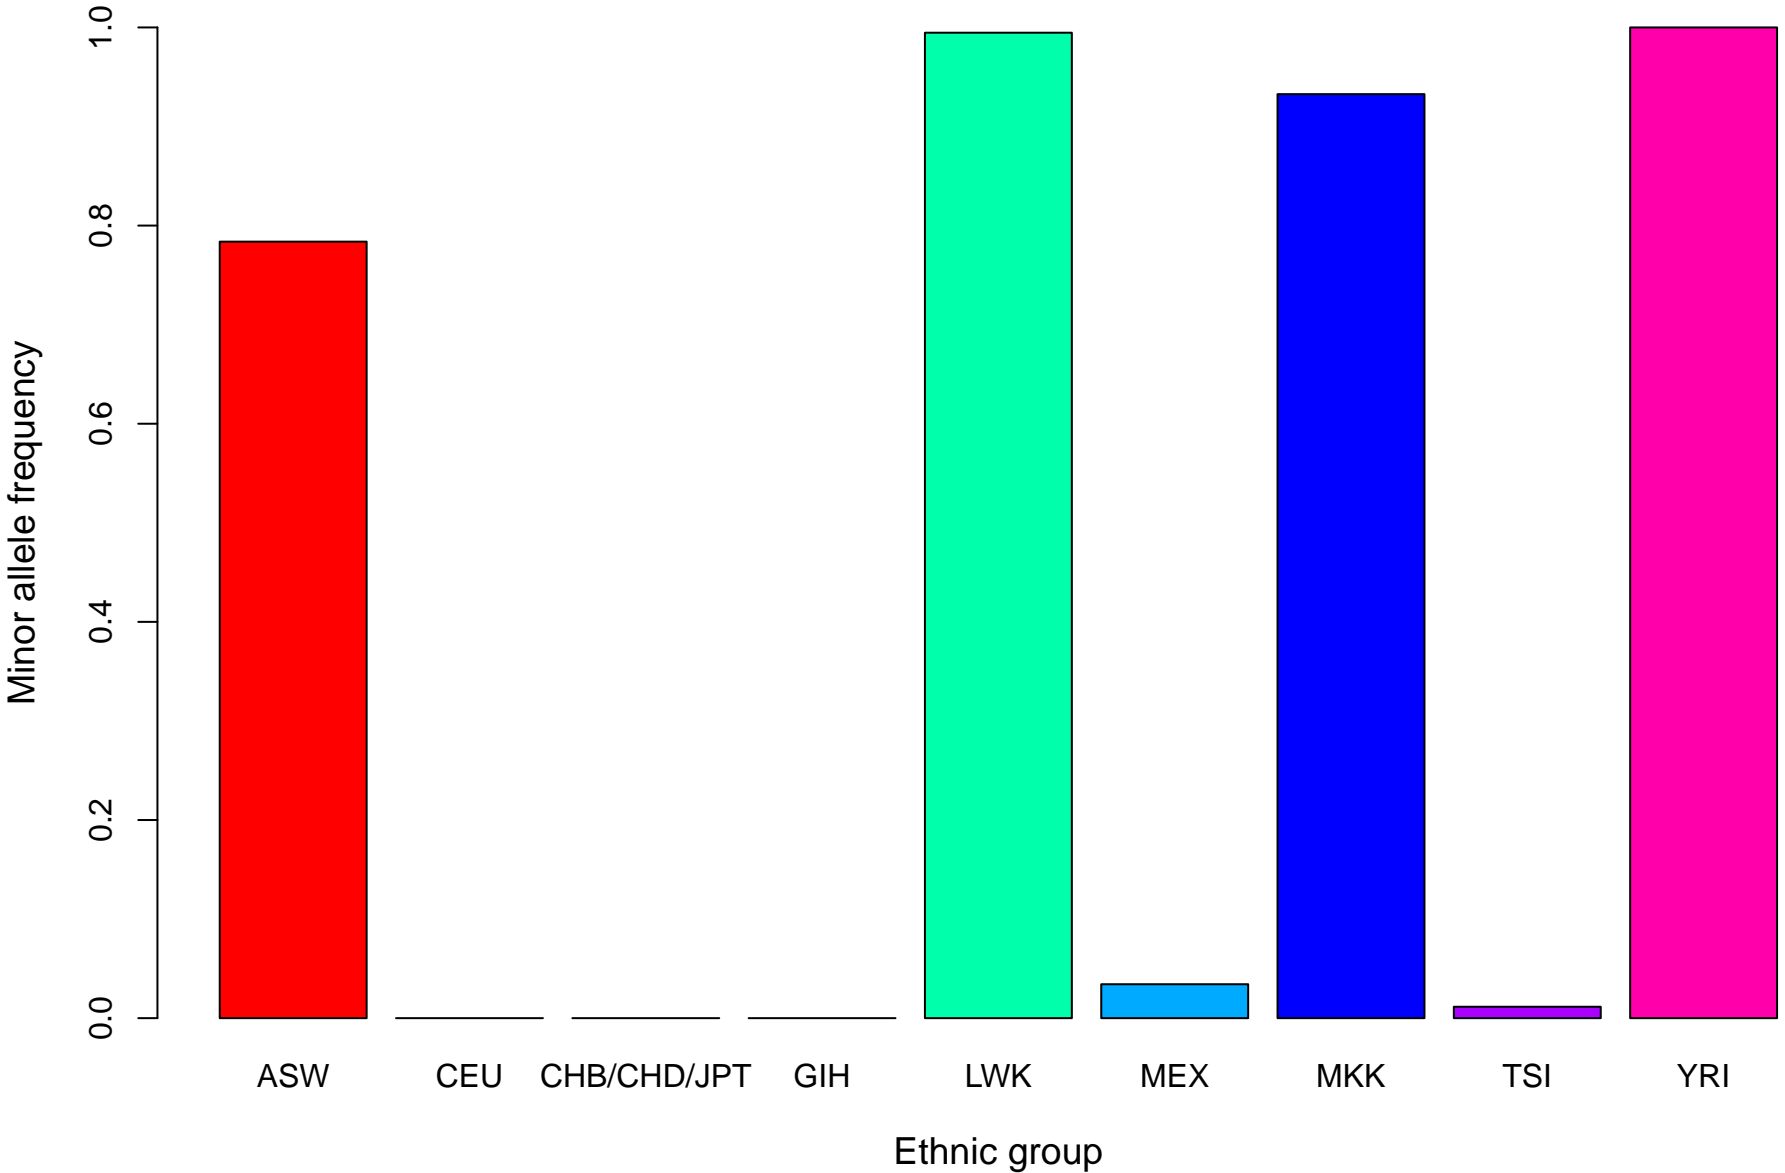

# rs6437783\_C

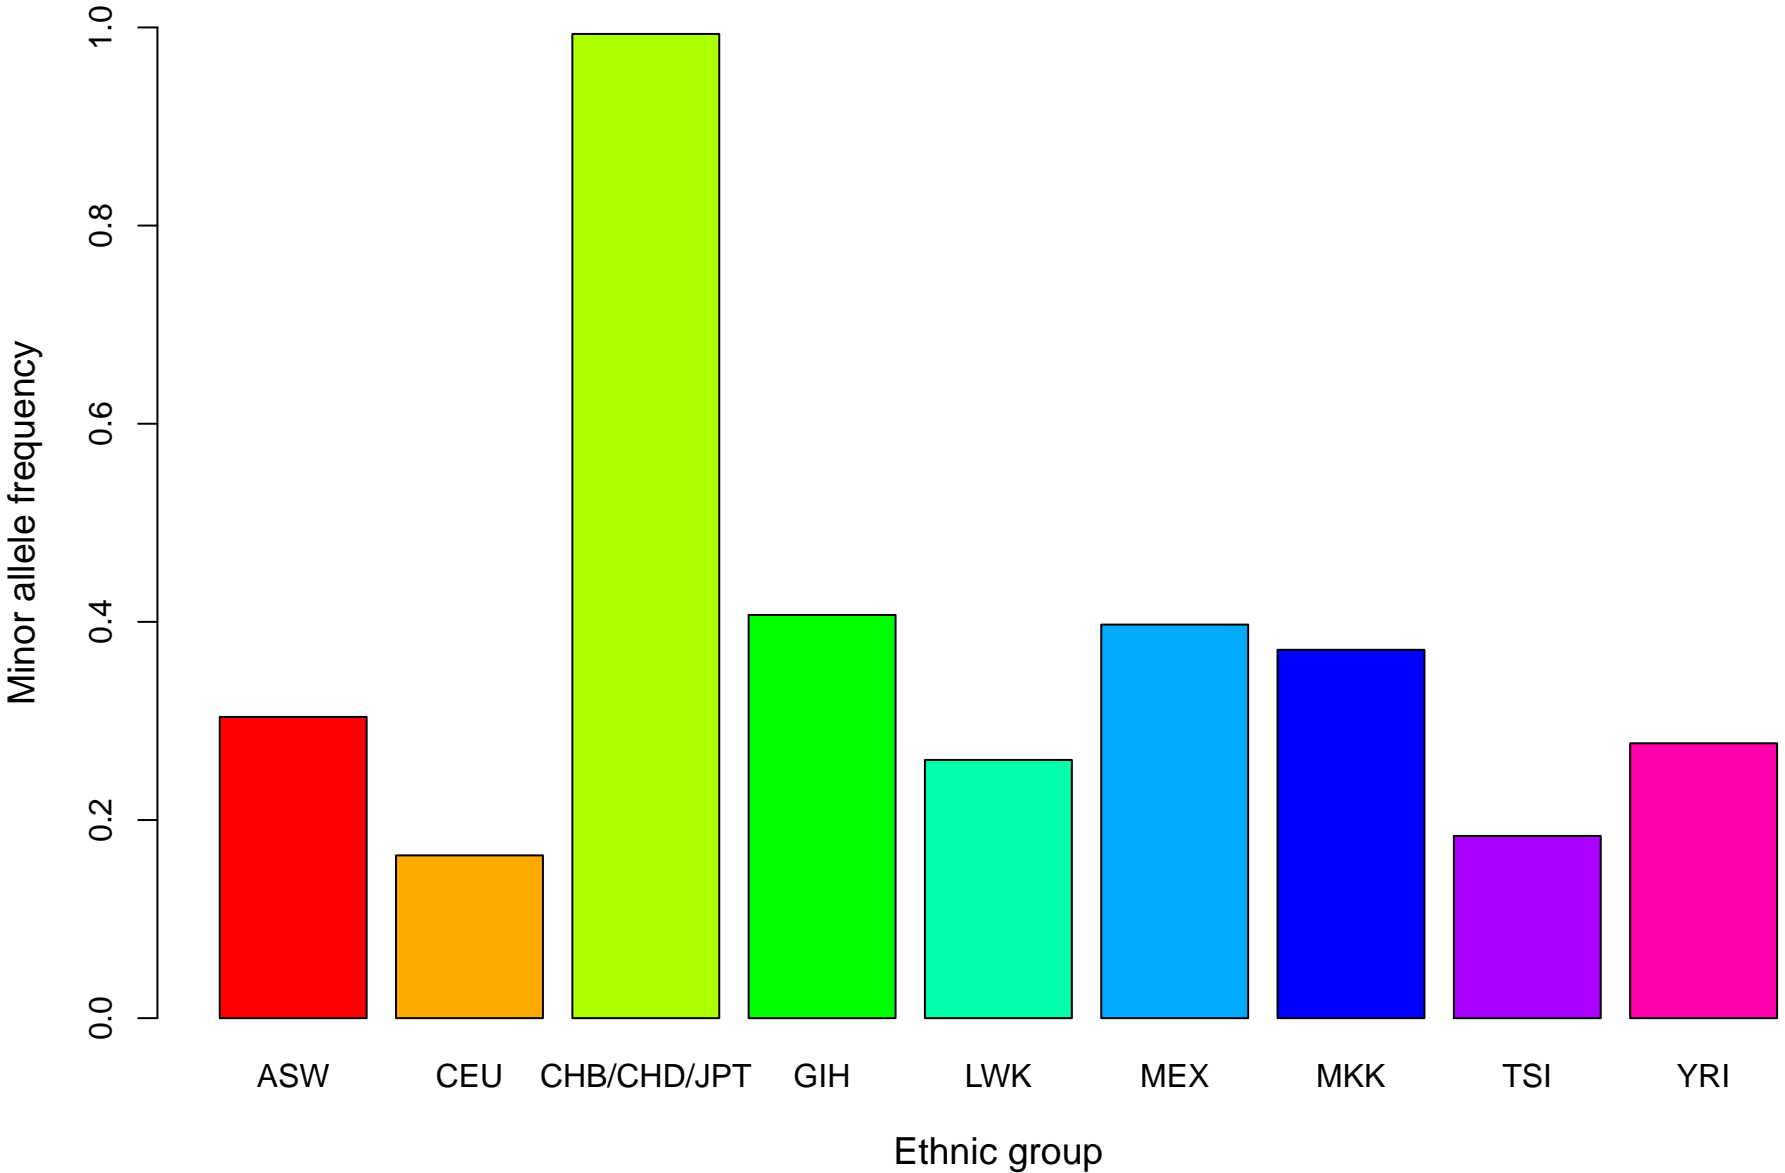

# rs2192015\_C

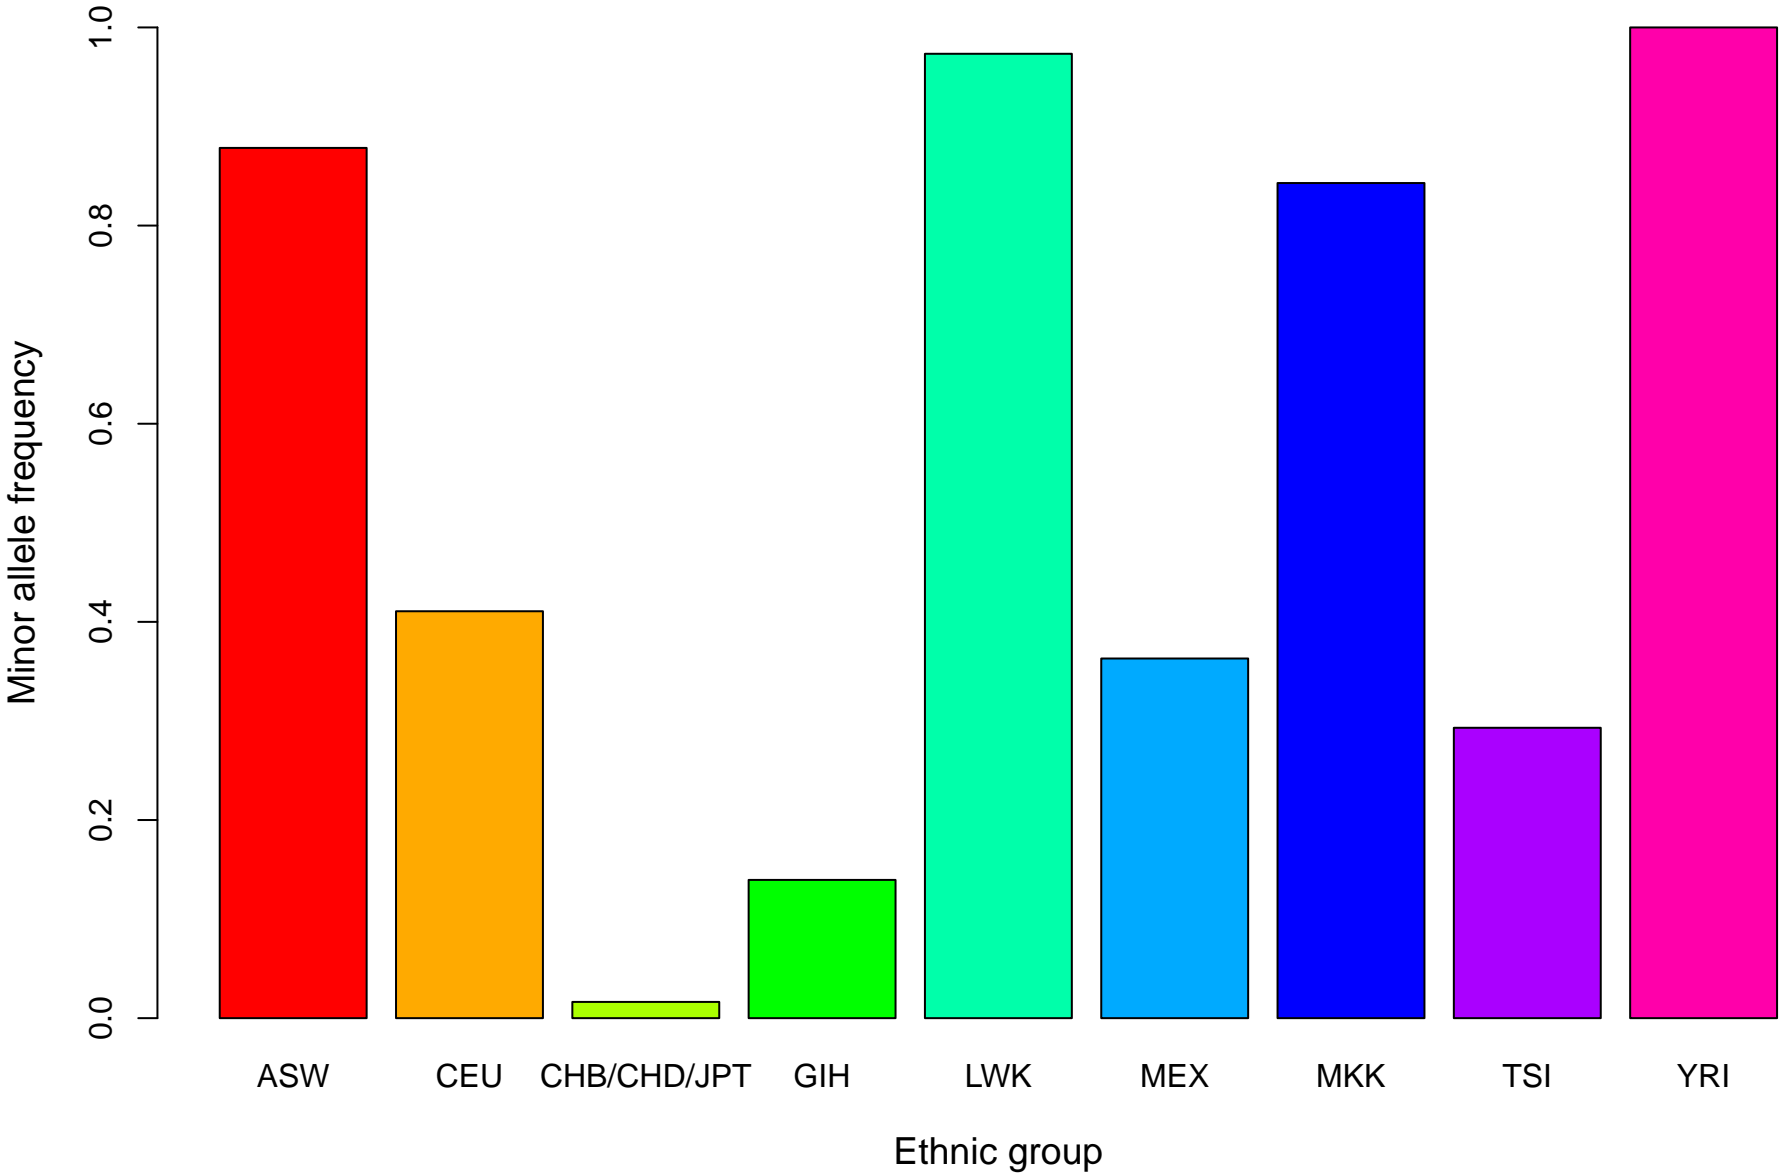

# rs2470102\_A

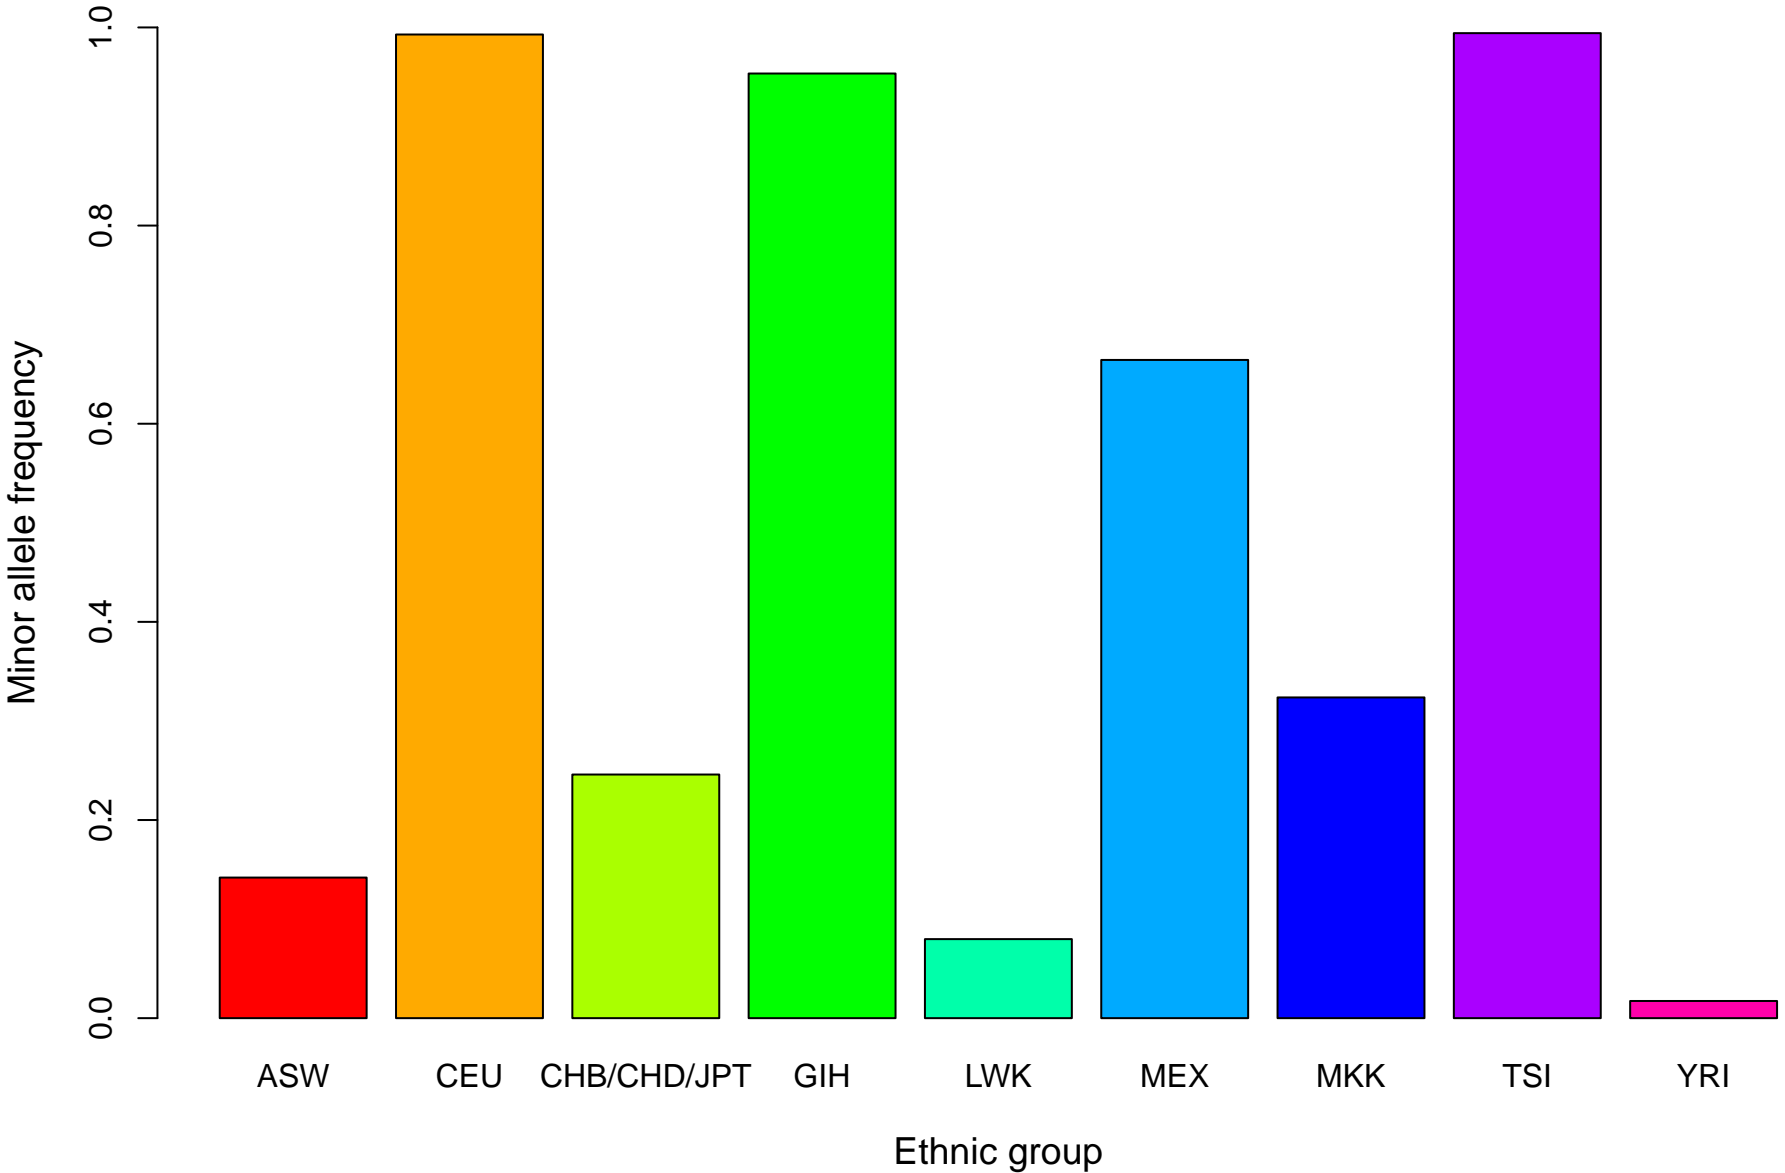

# rs1507086\_C

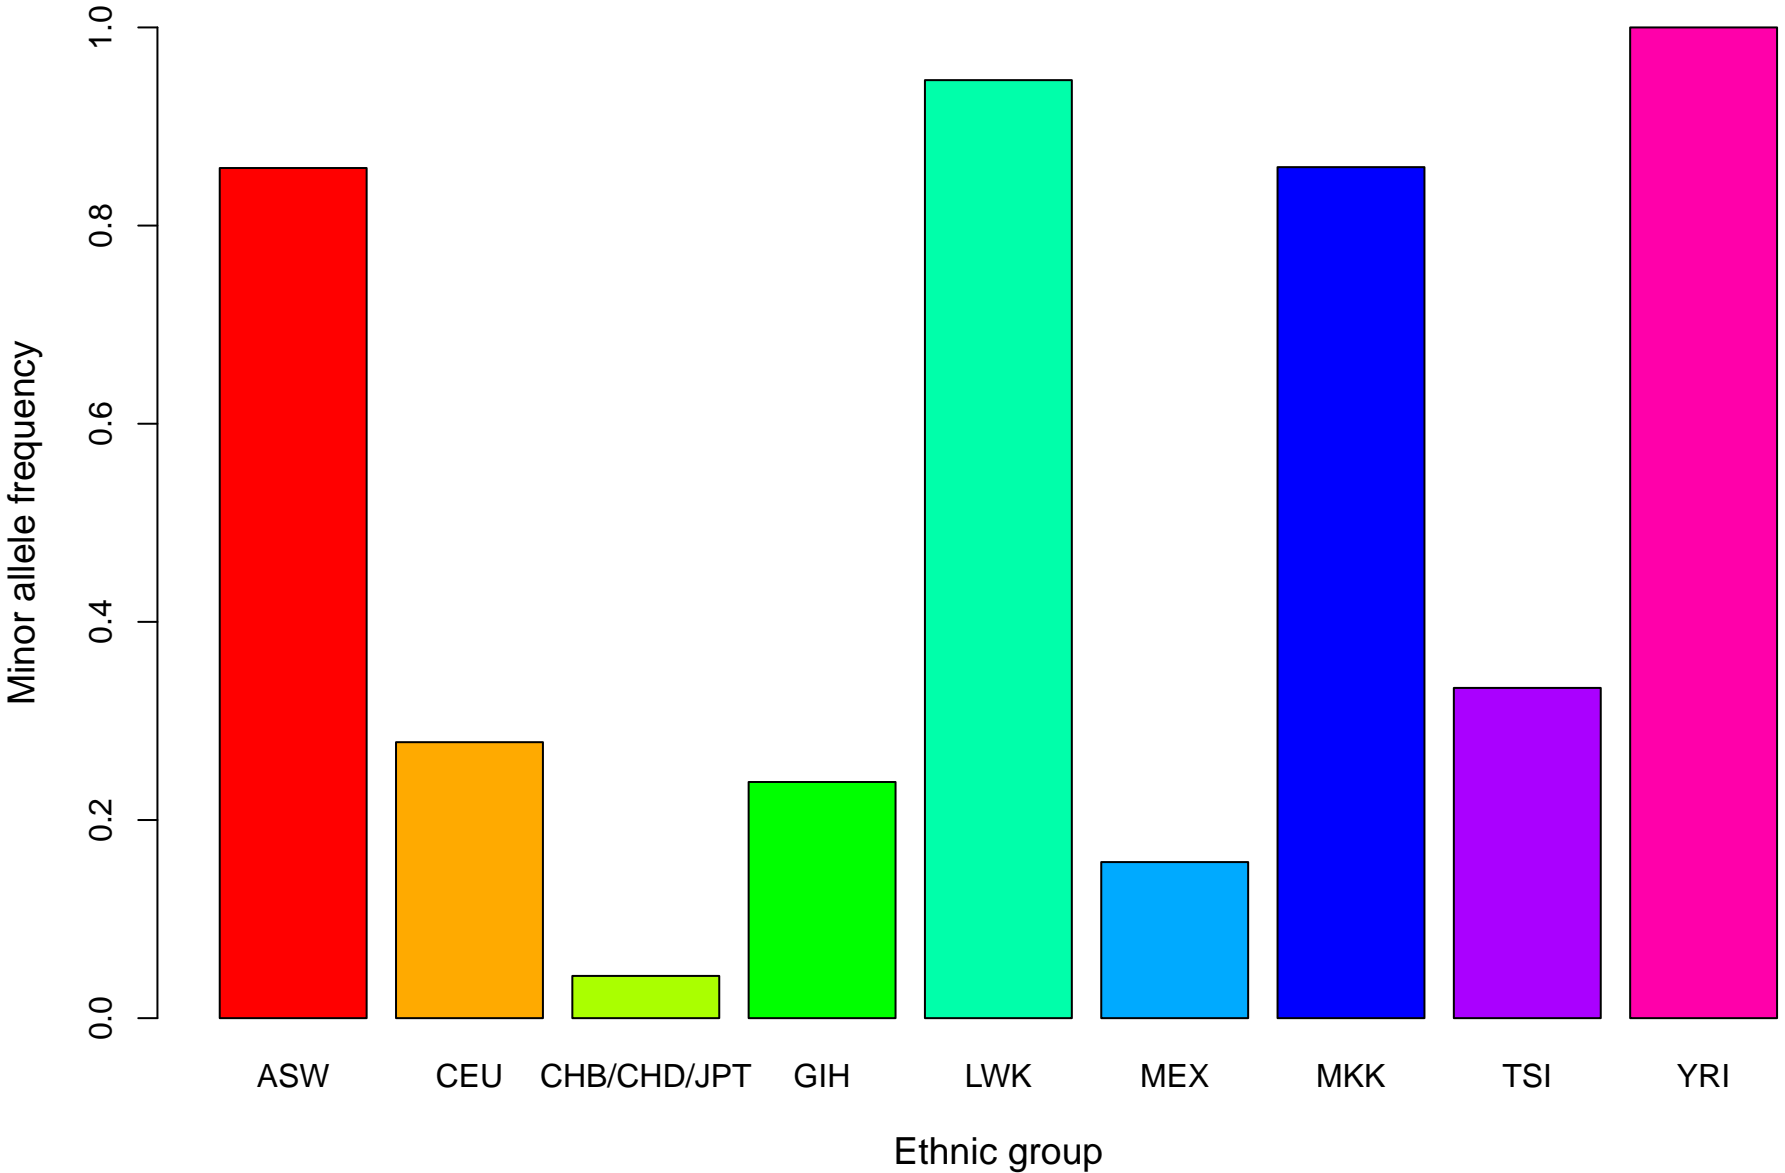

# rs4149436\_C

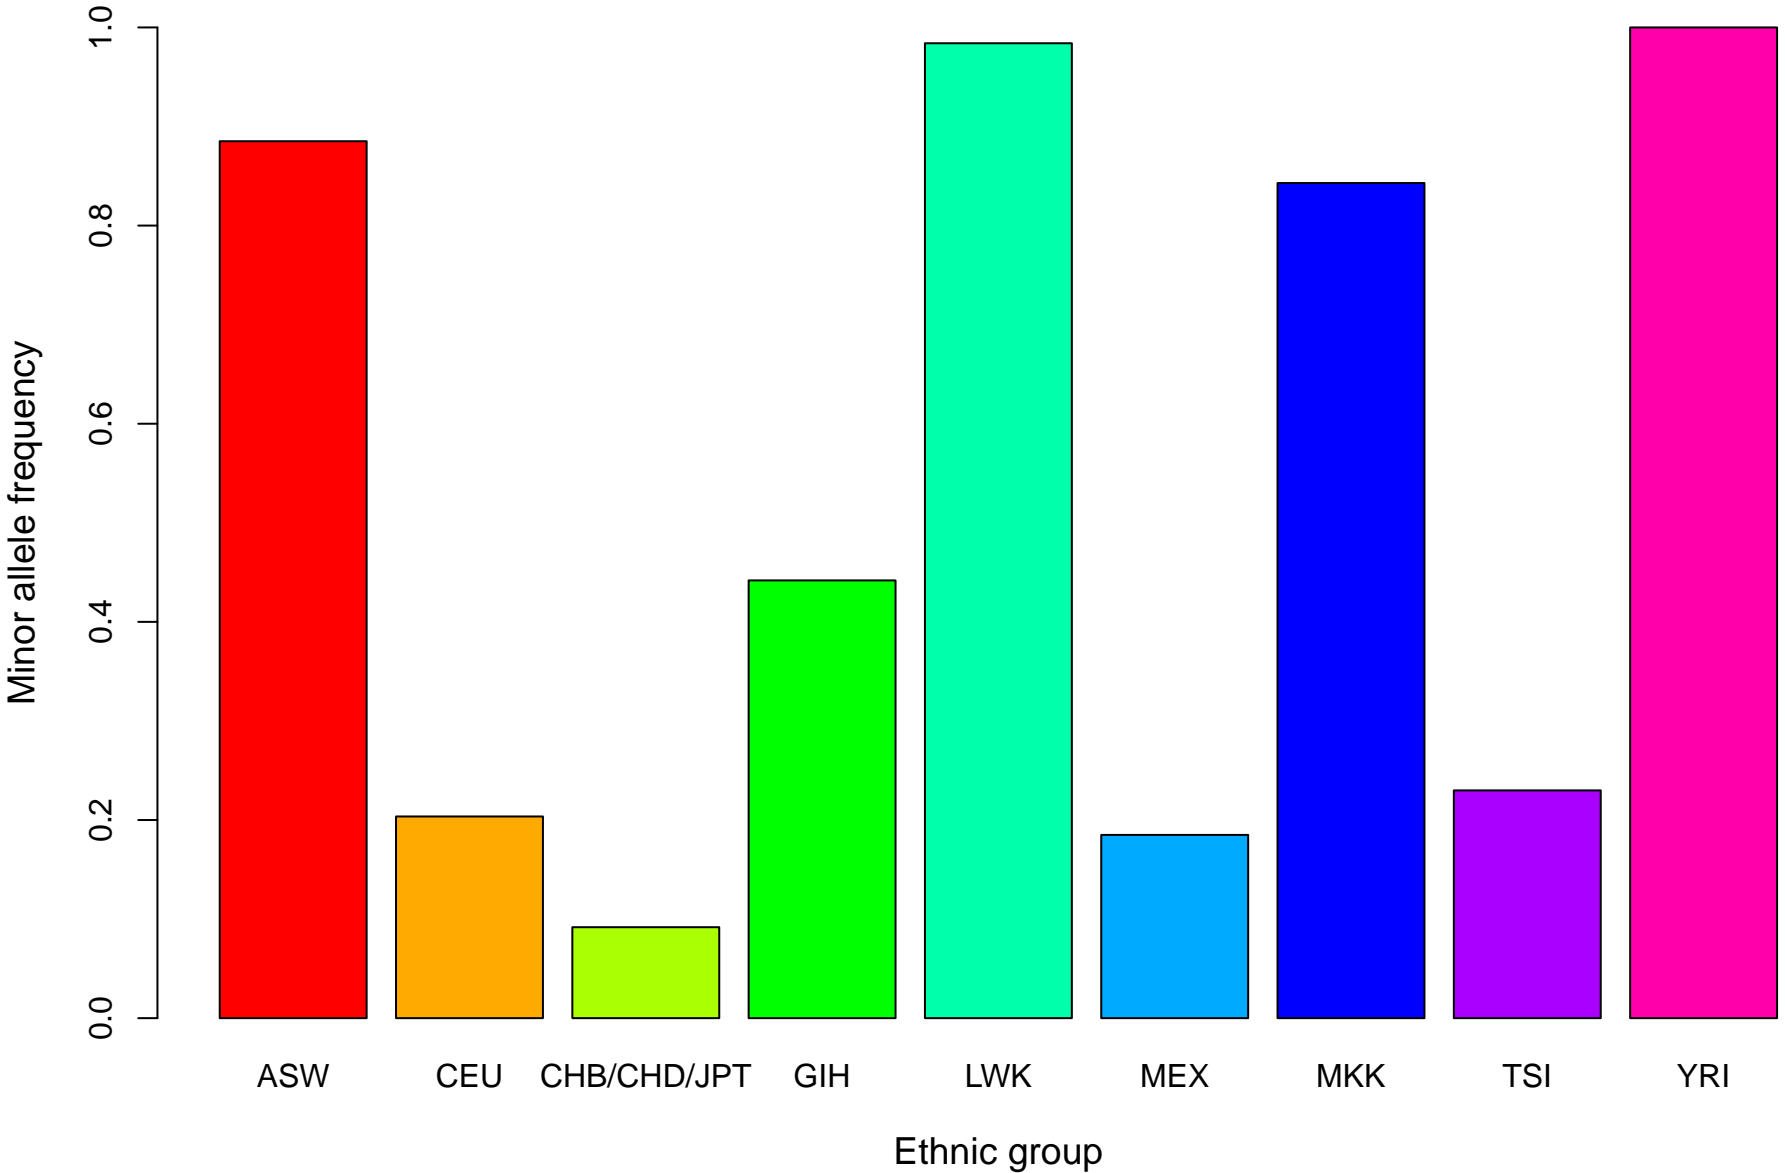

# rs738989\_A

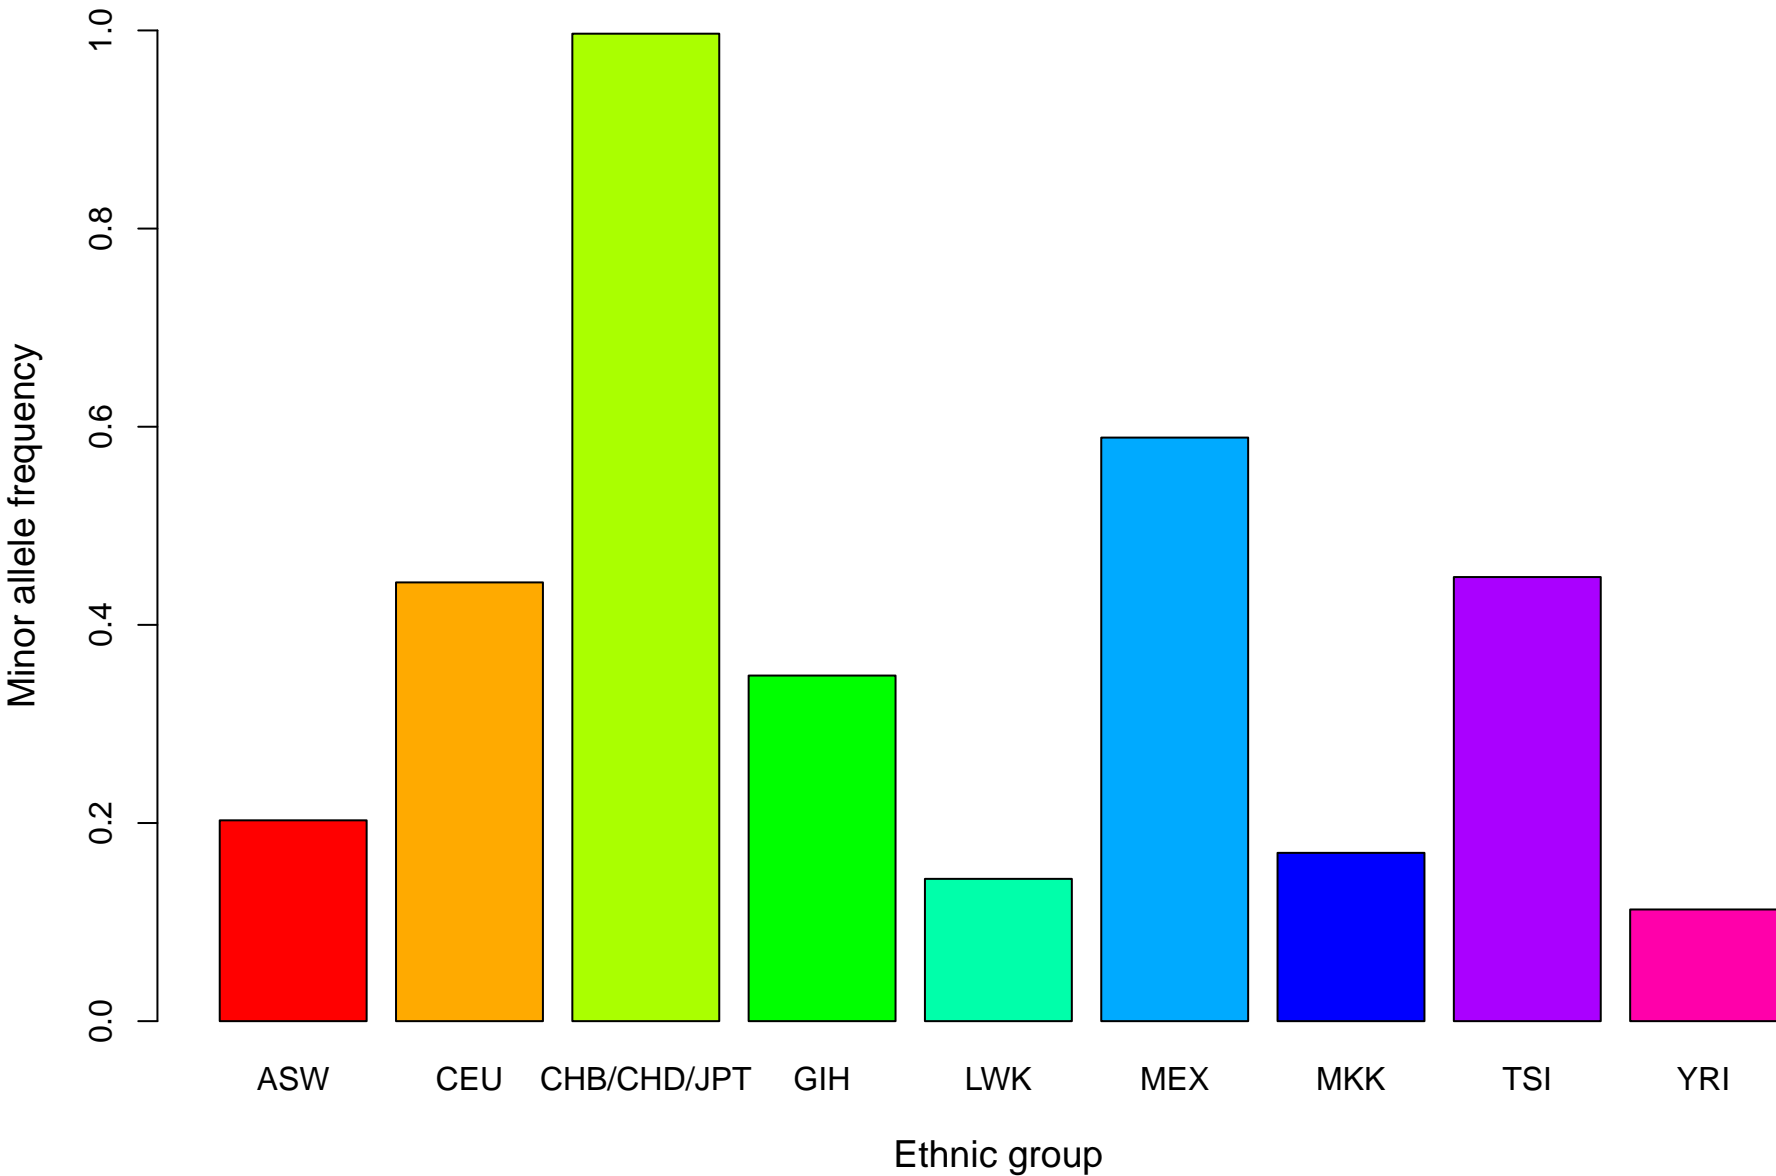

# rs7349\_T

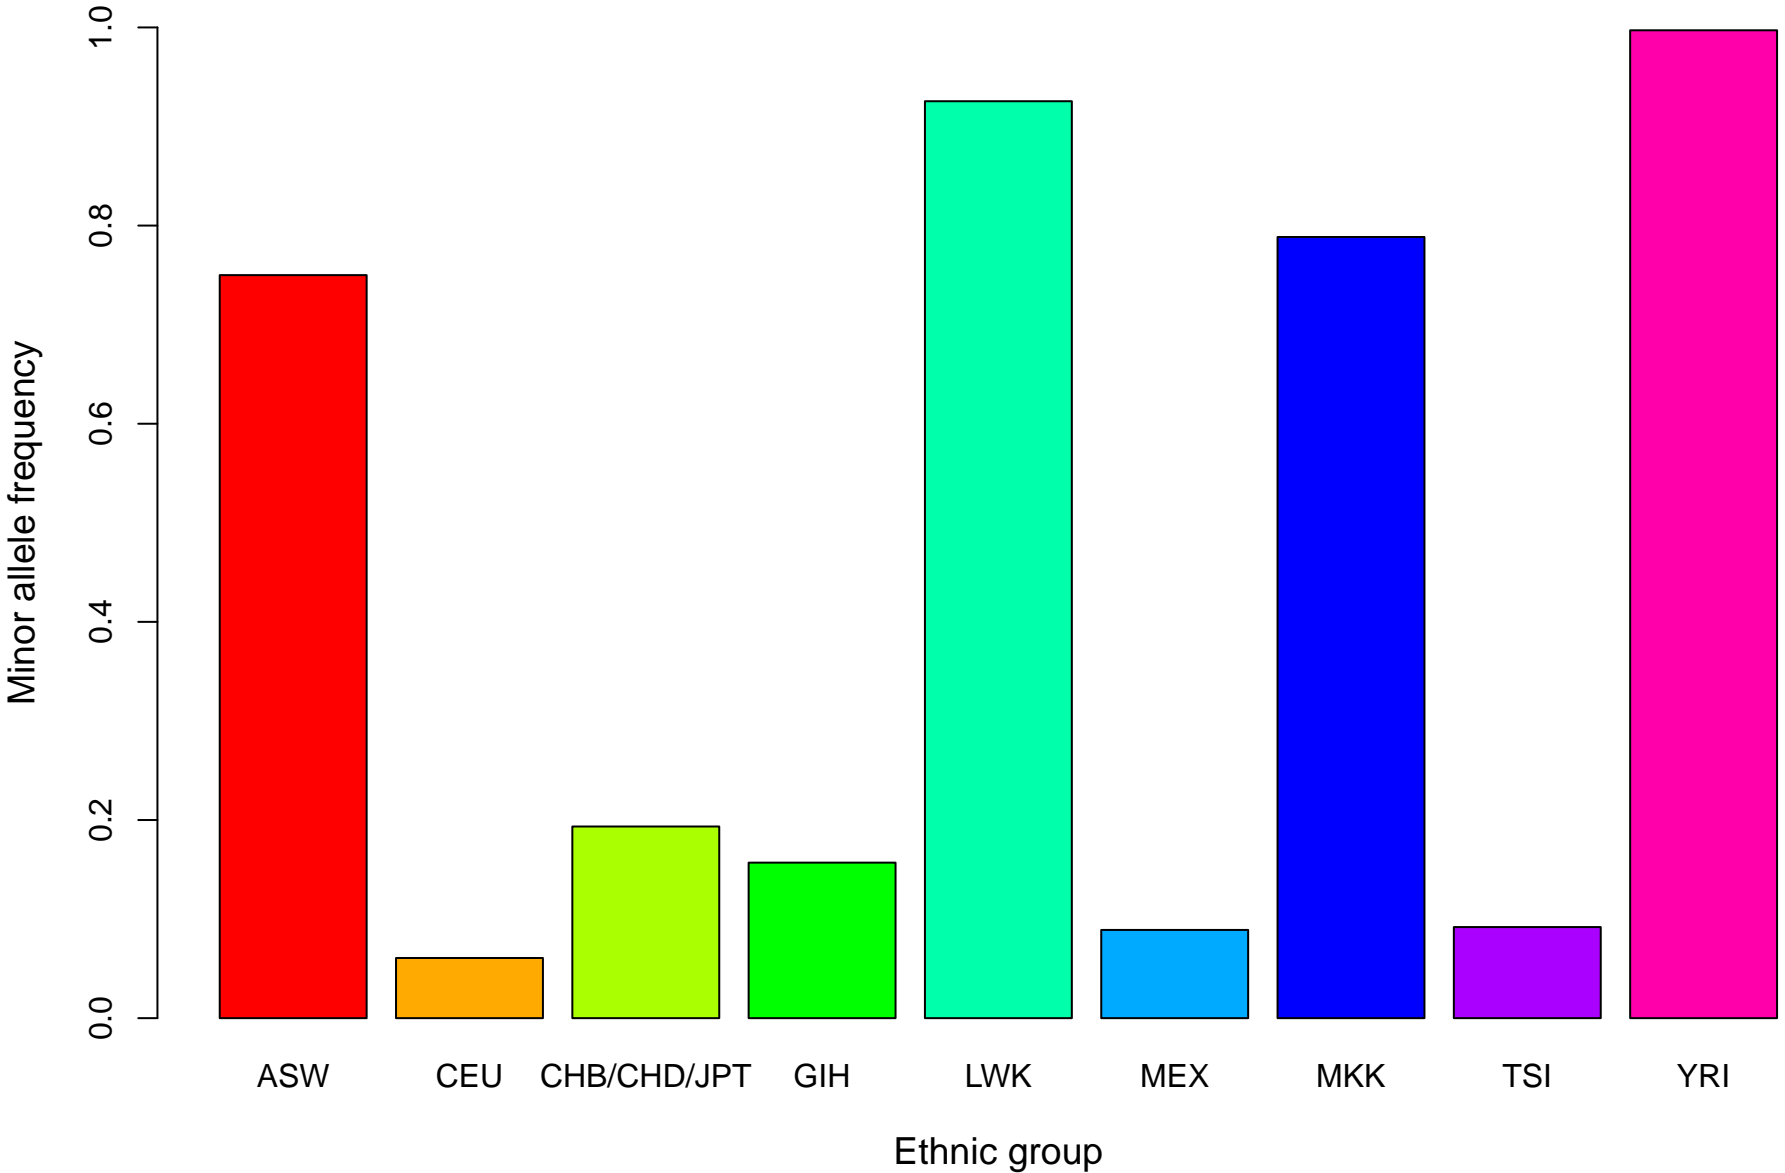



# rs10037966\_G

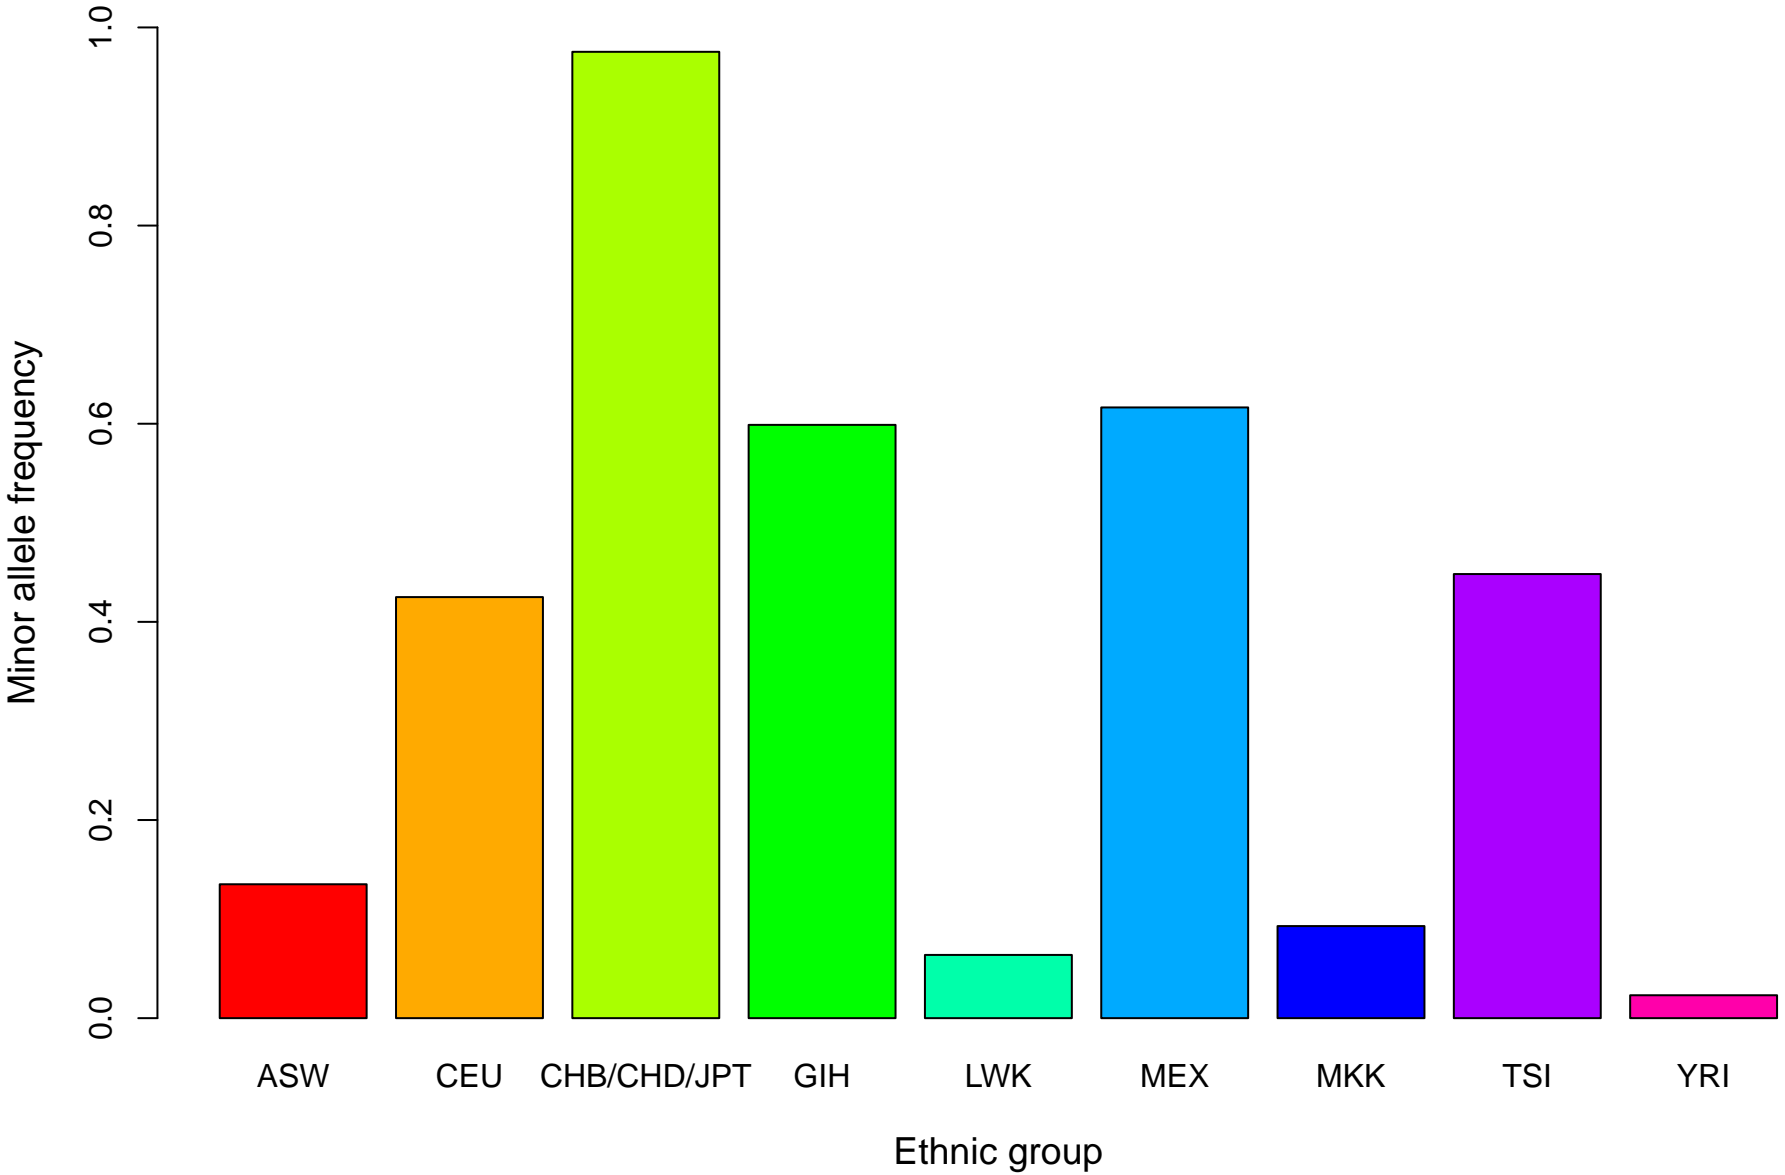

# rs35389\_A

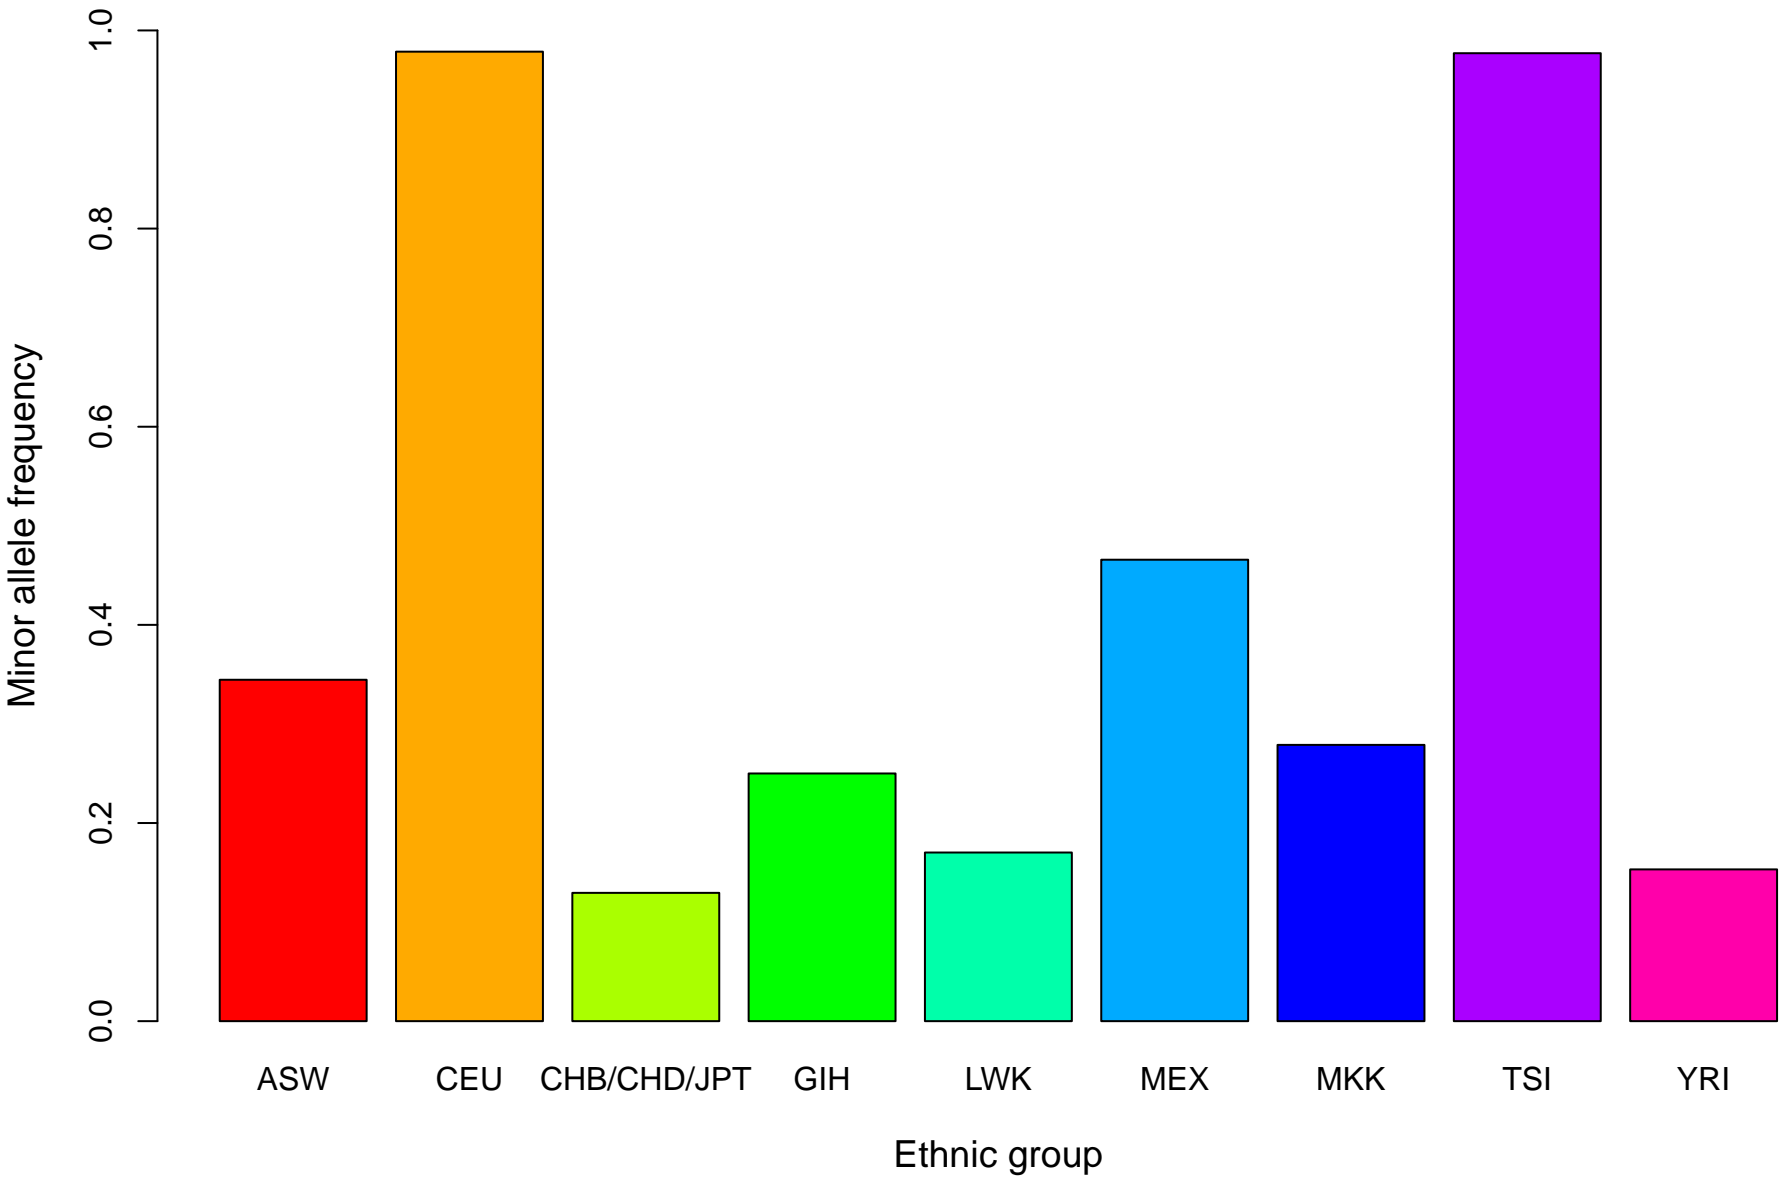

# rs35774871\_T

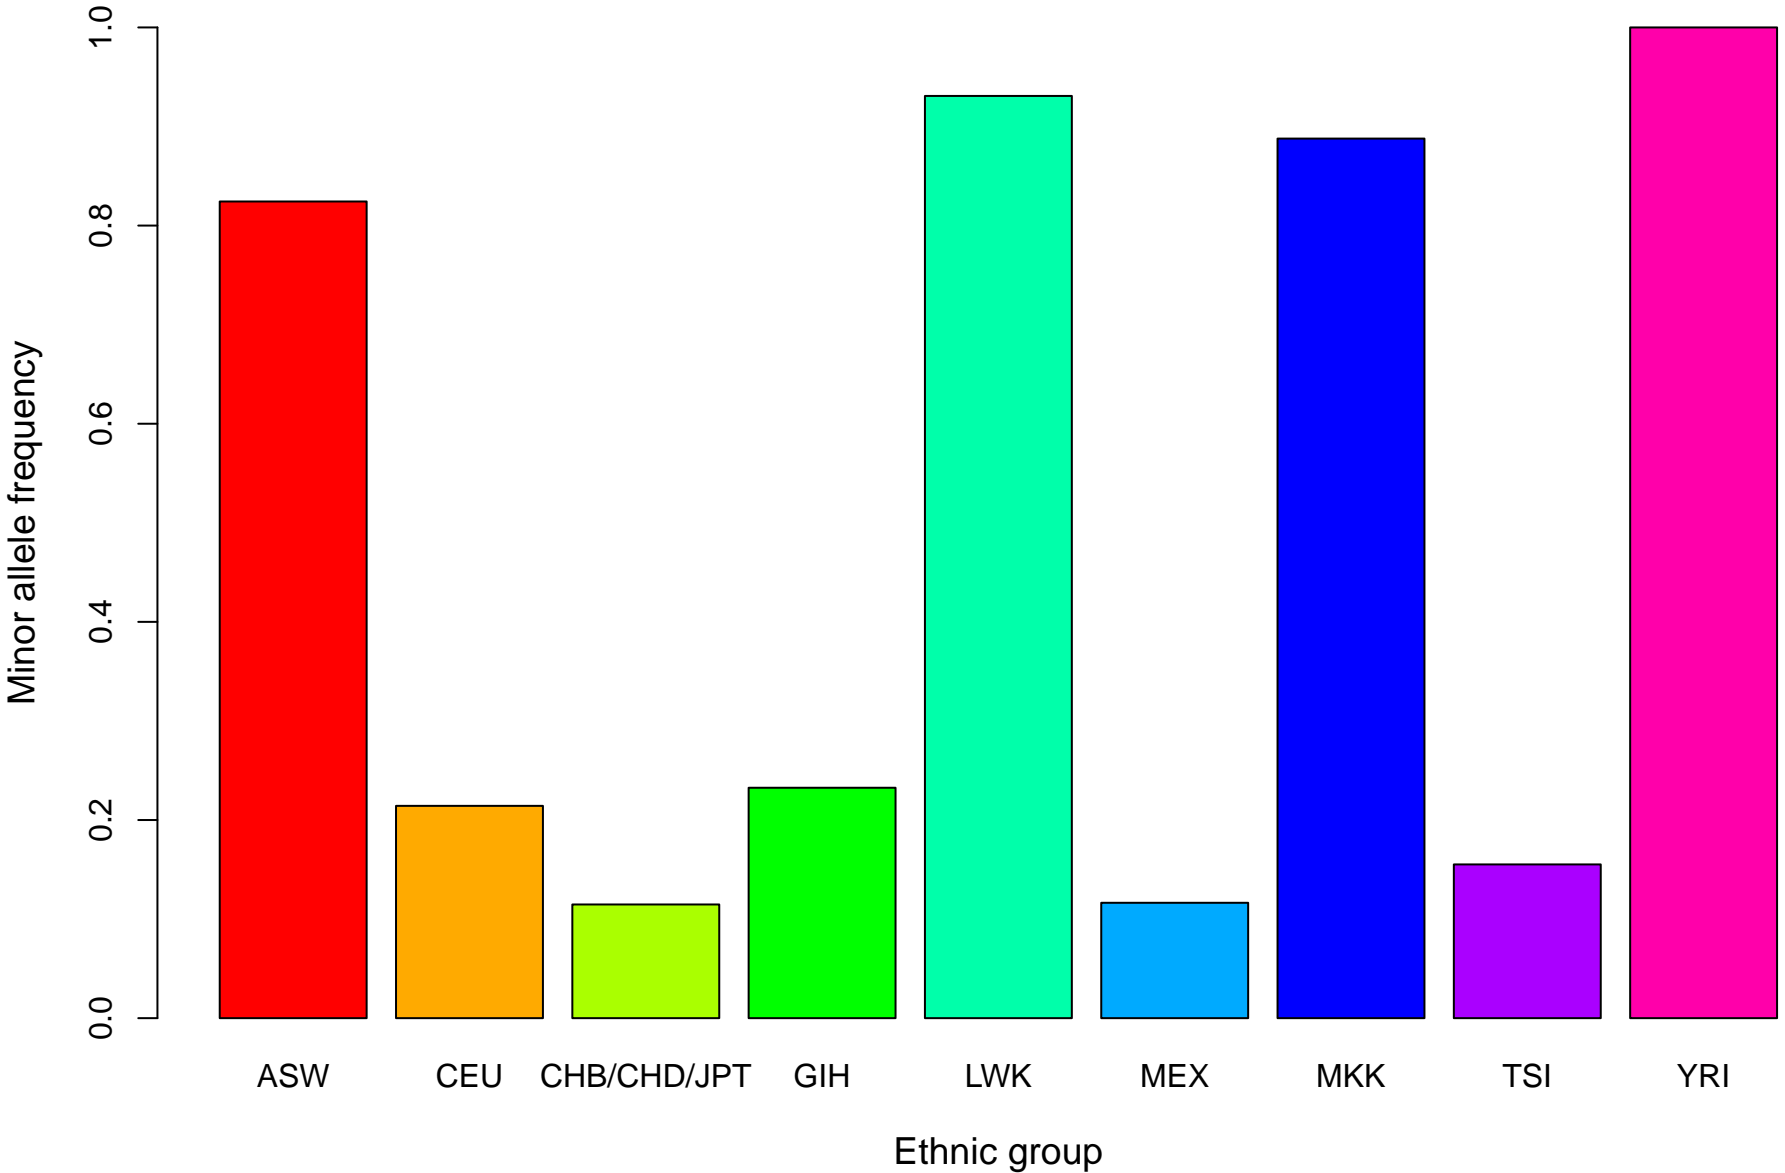

# rs6439655\_A

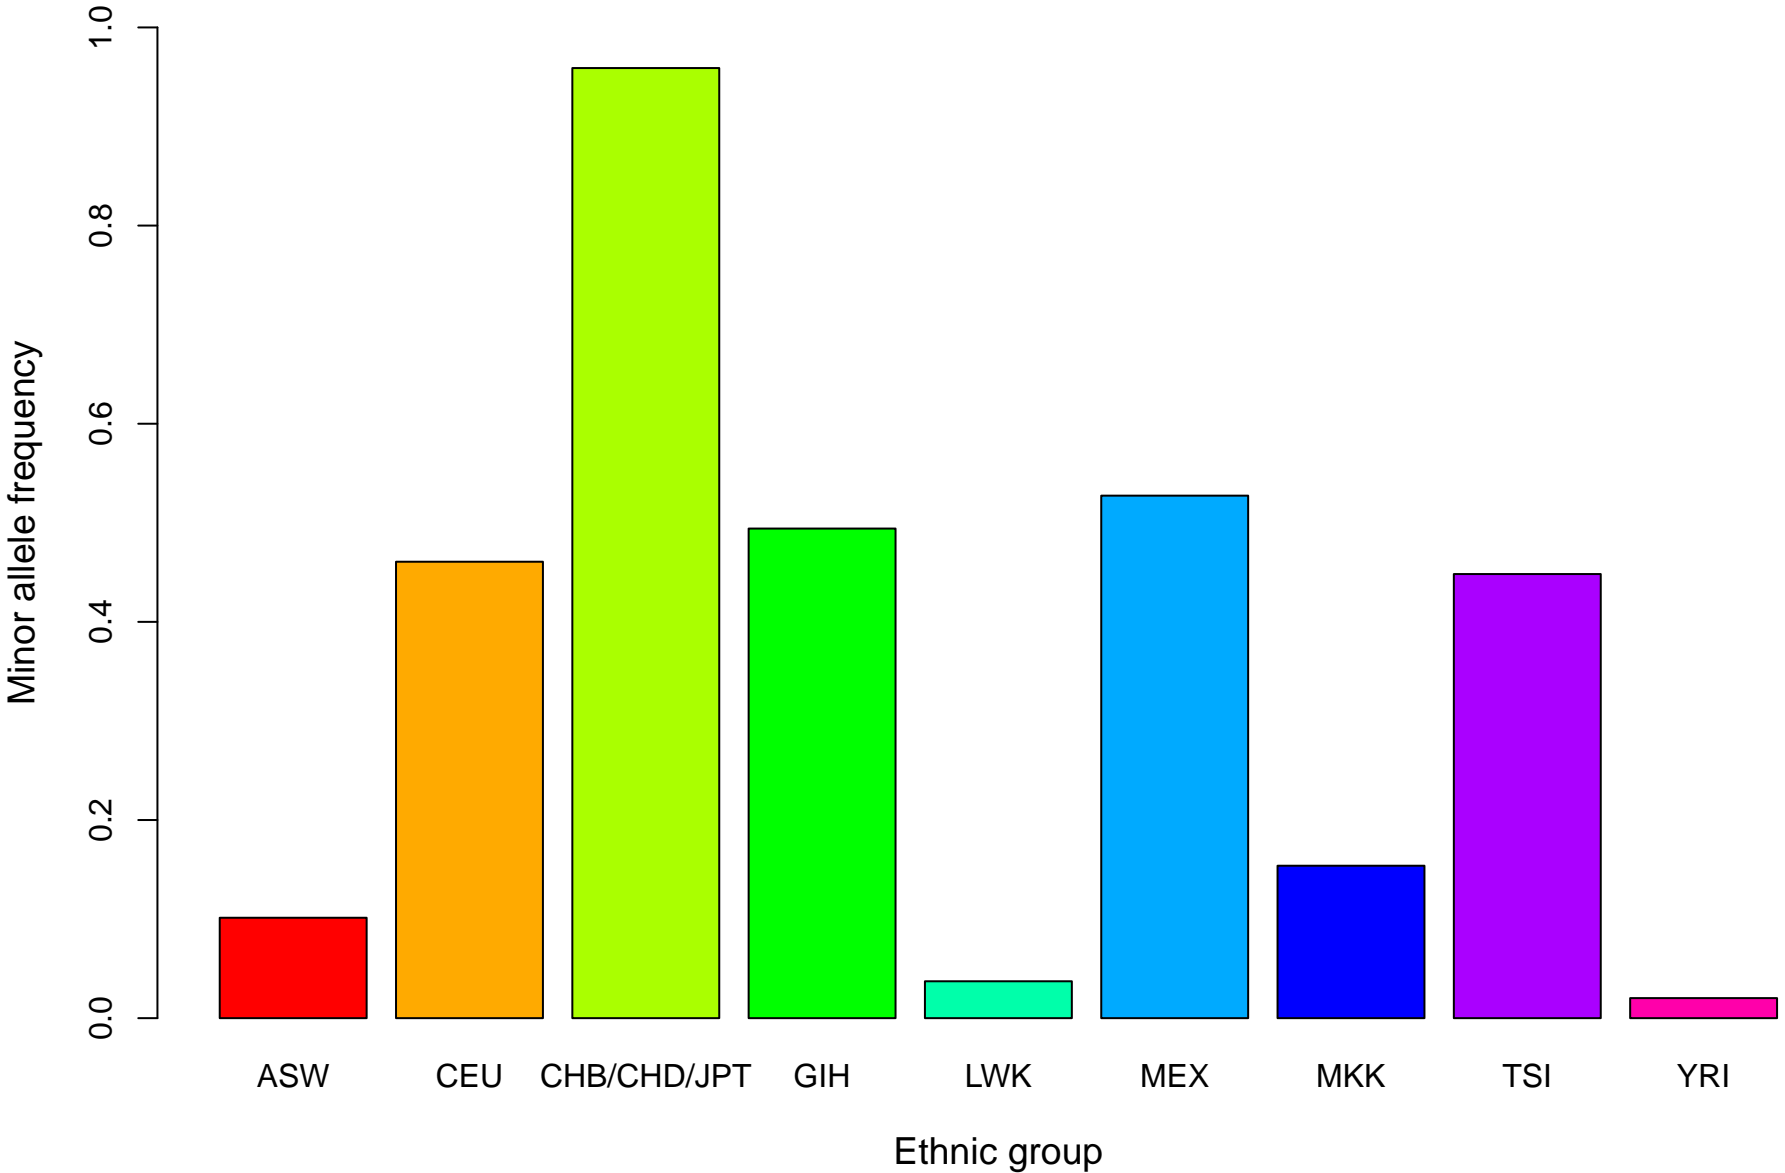

# rs2736306\_A

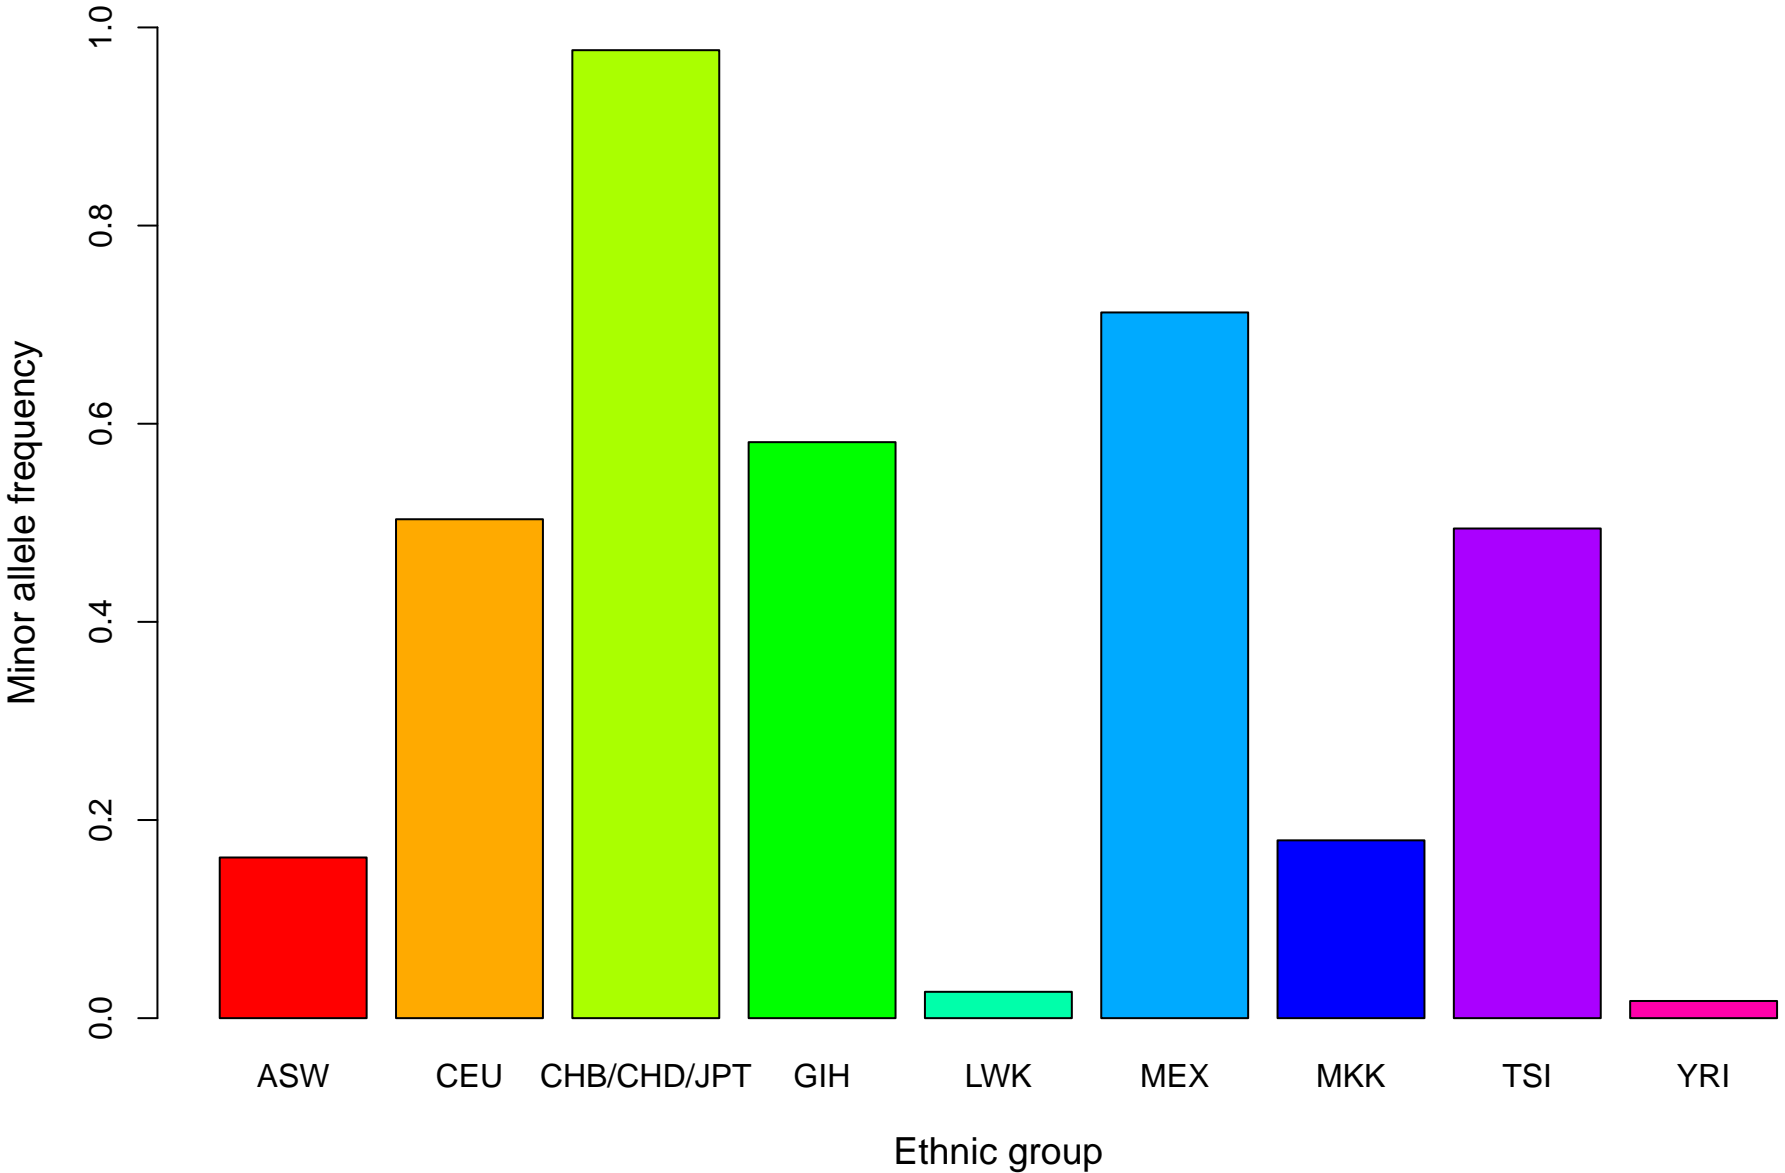

# rs12594483\_G

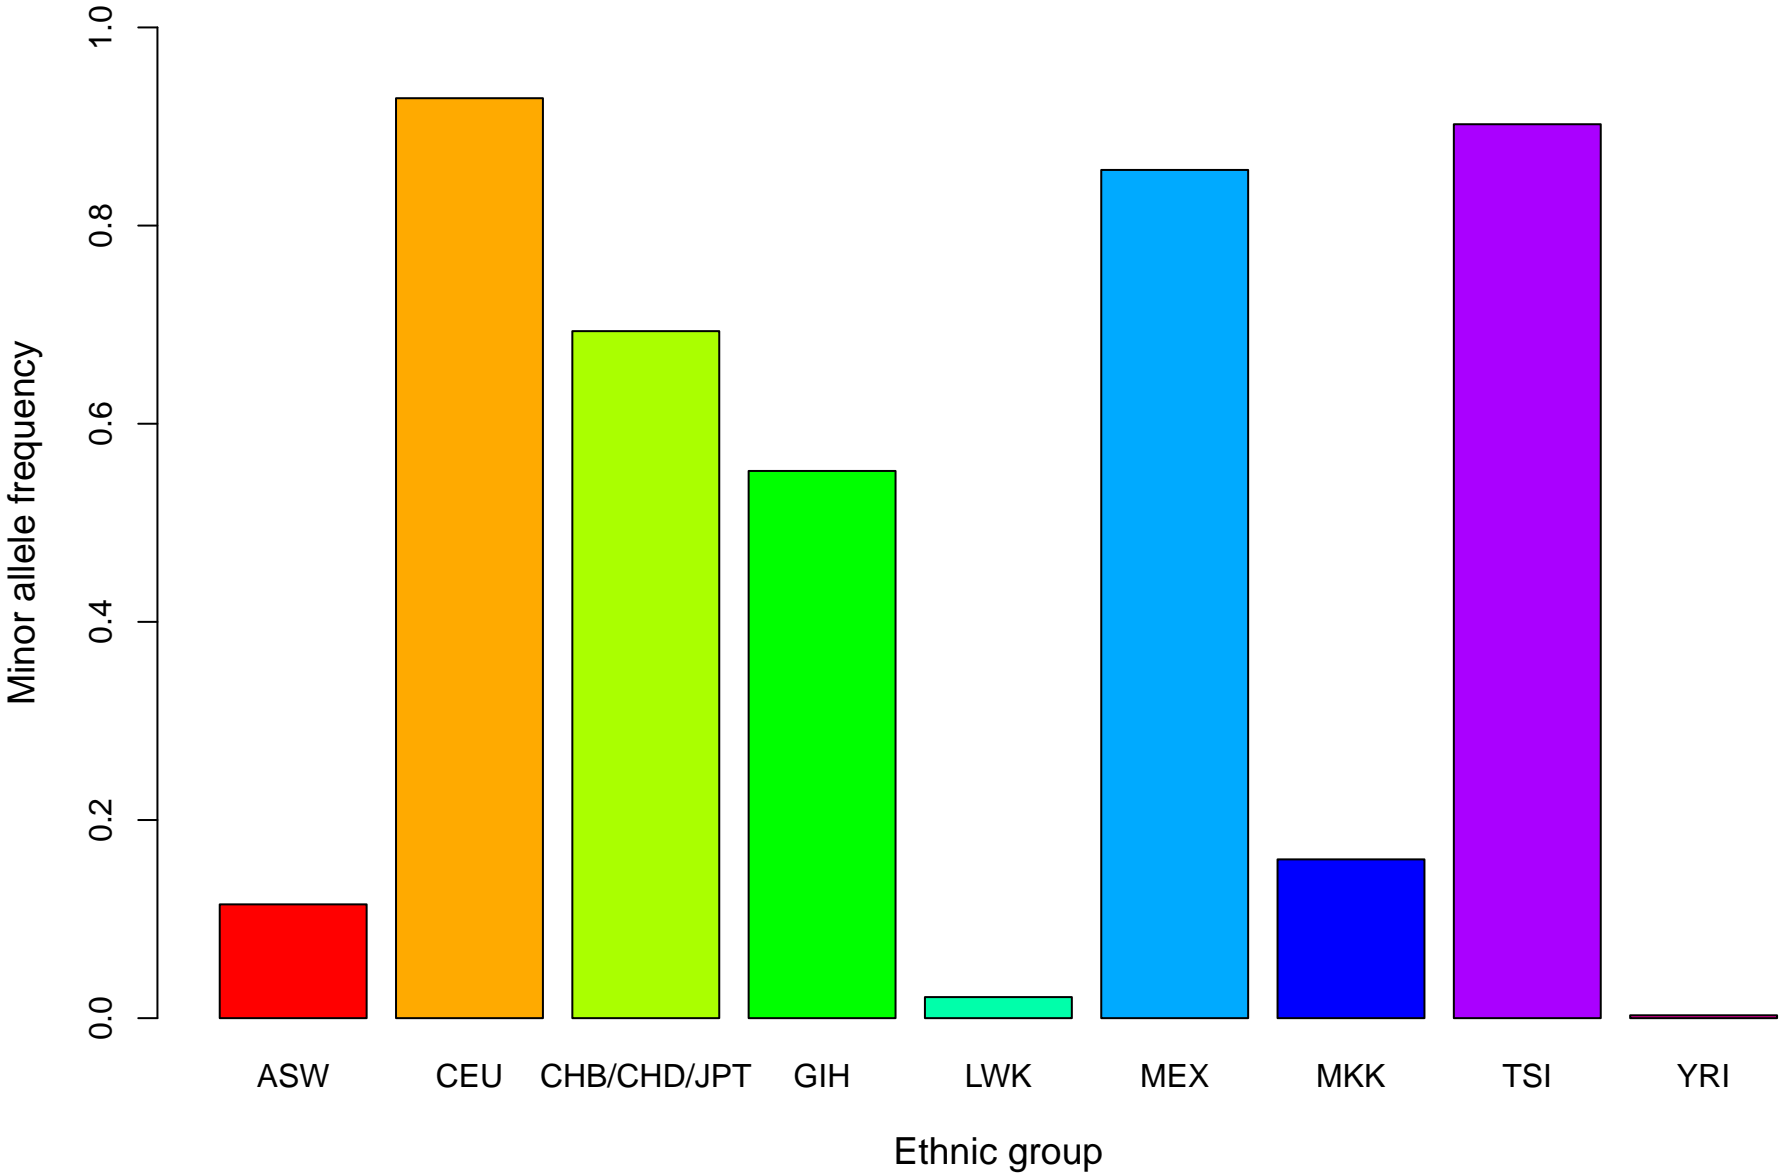

# rs3817874\_G

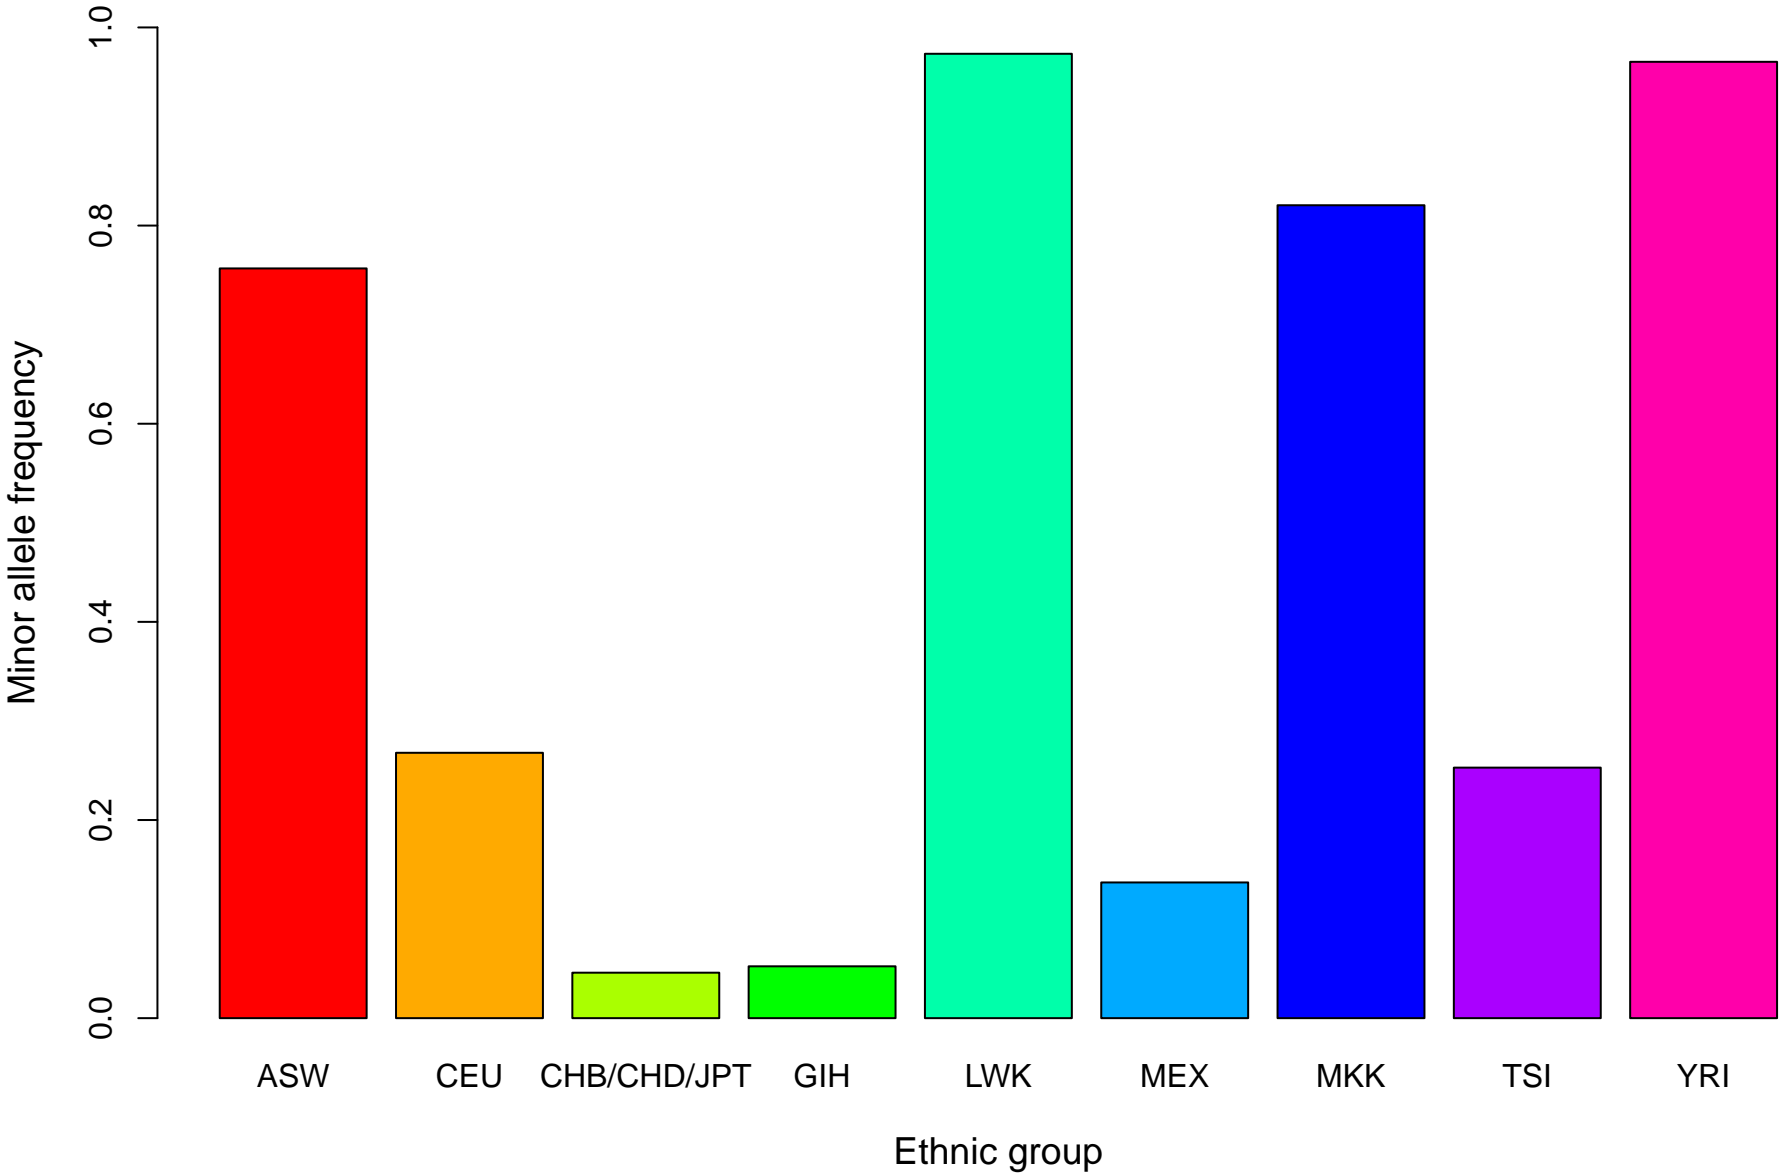

# rs7009254\_T

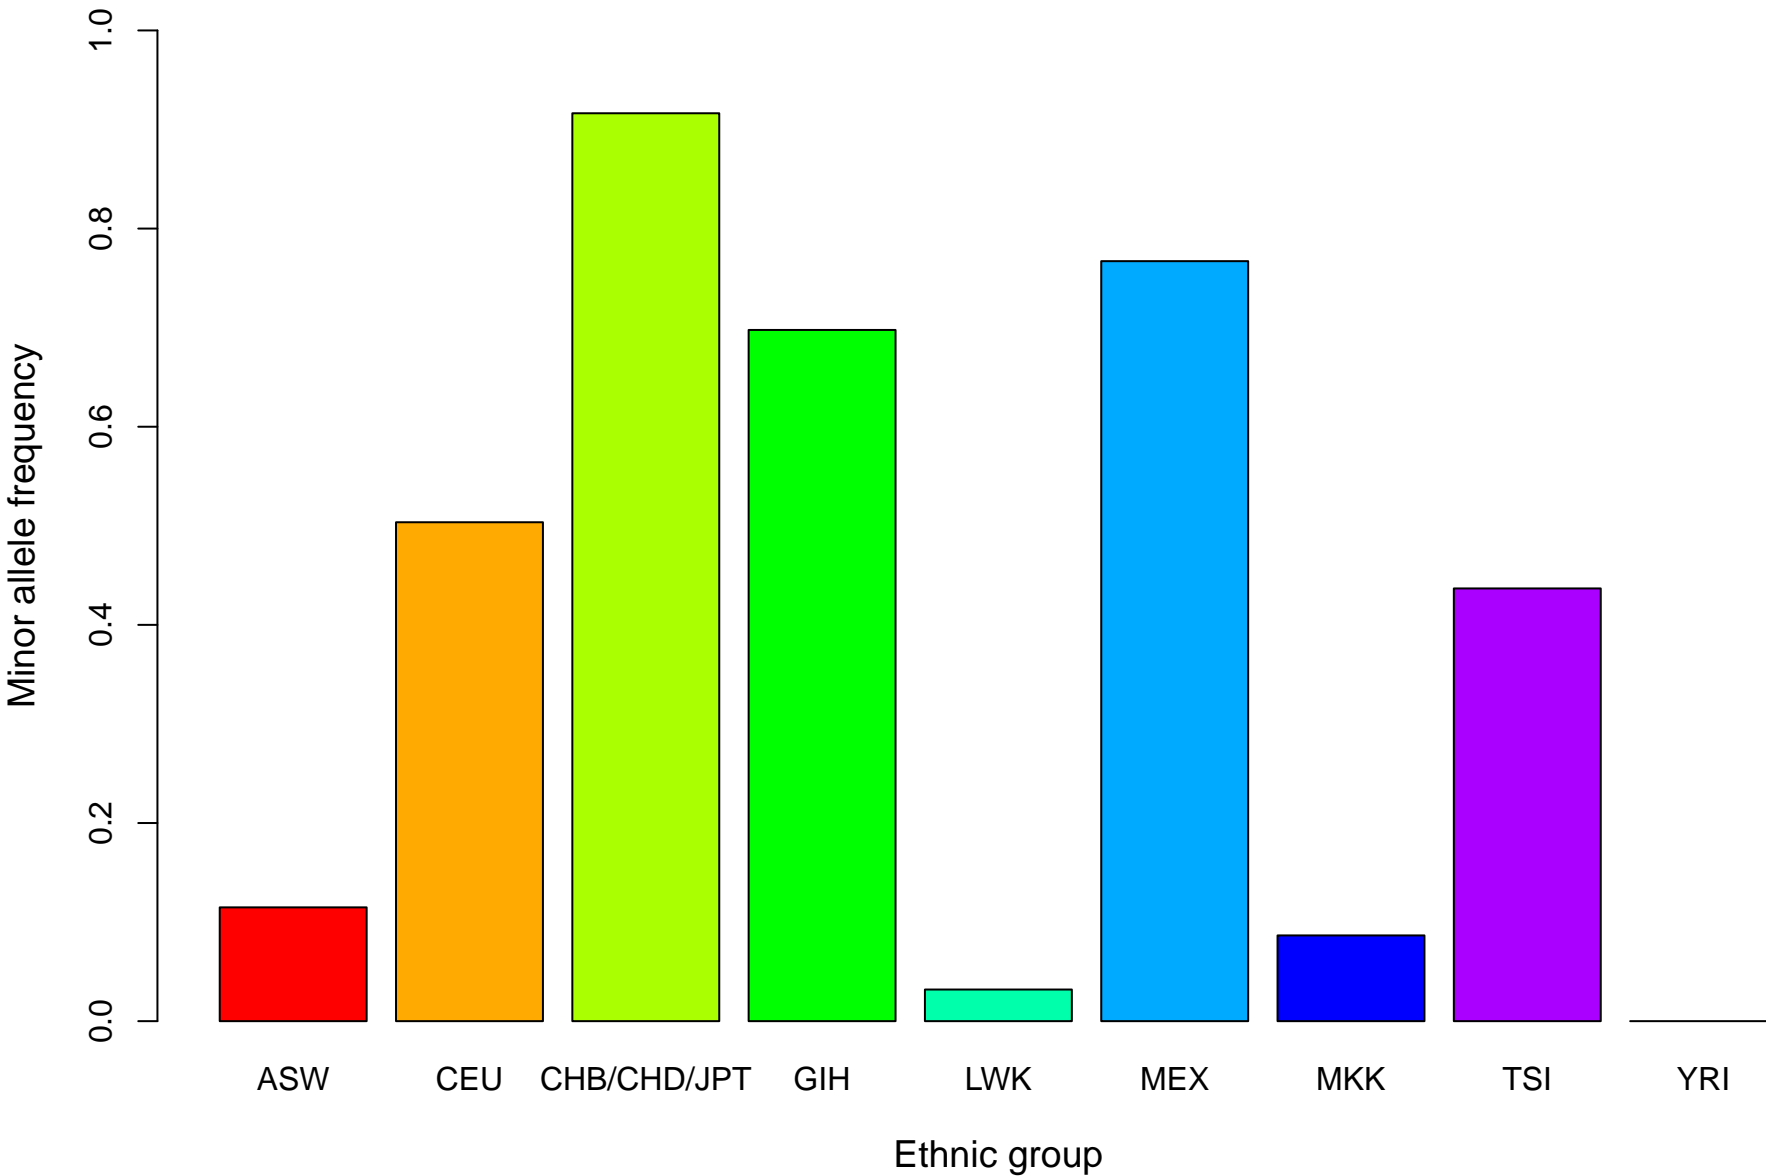



# rs11184896\_T

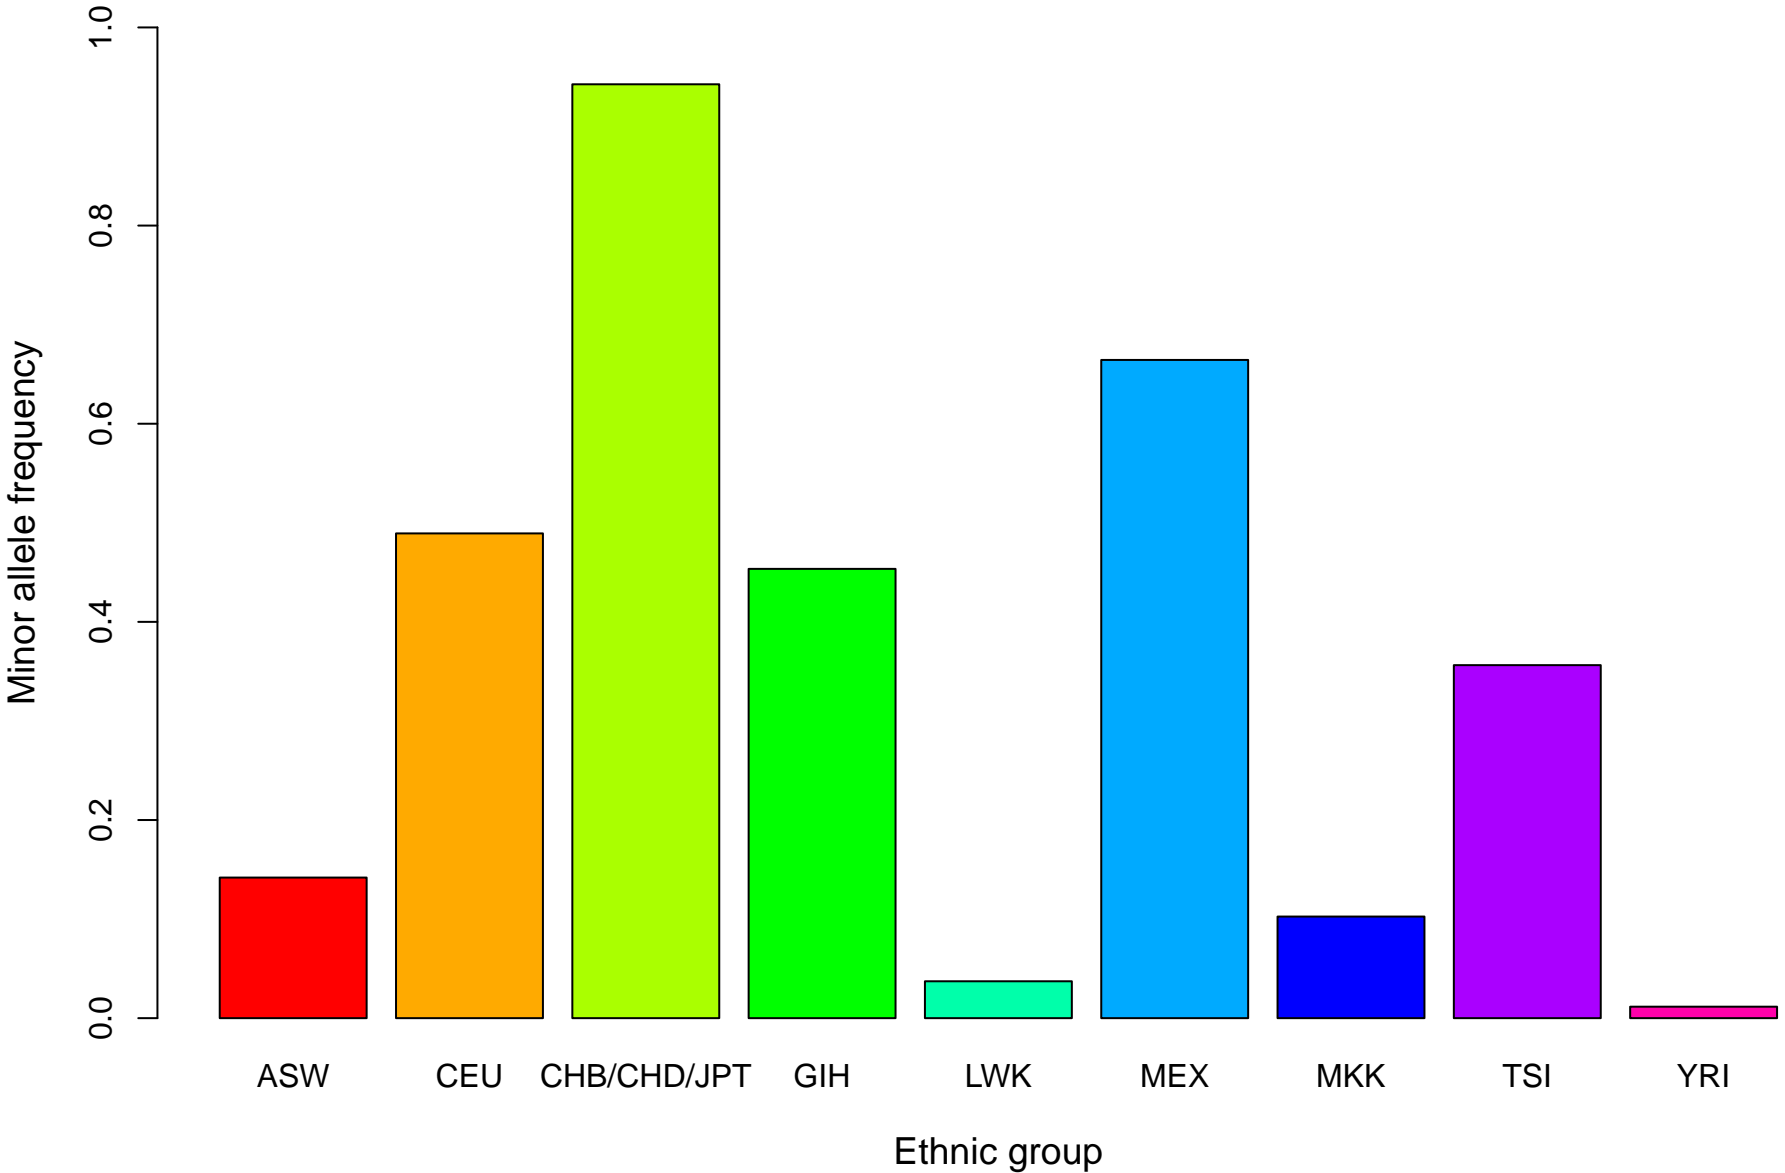

# rs12913832\_G

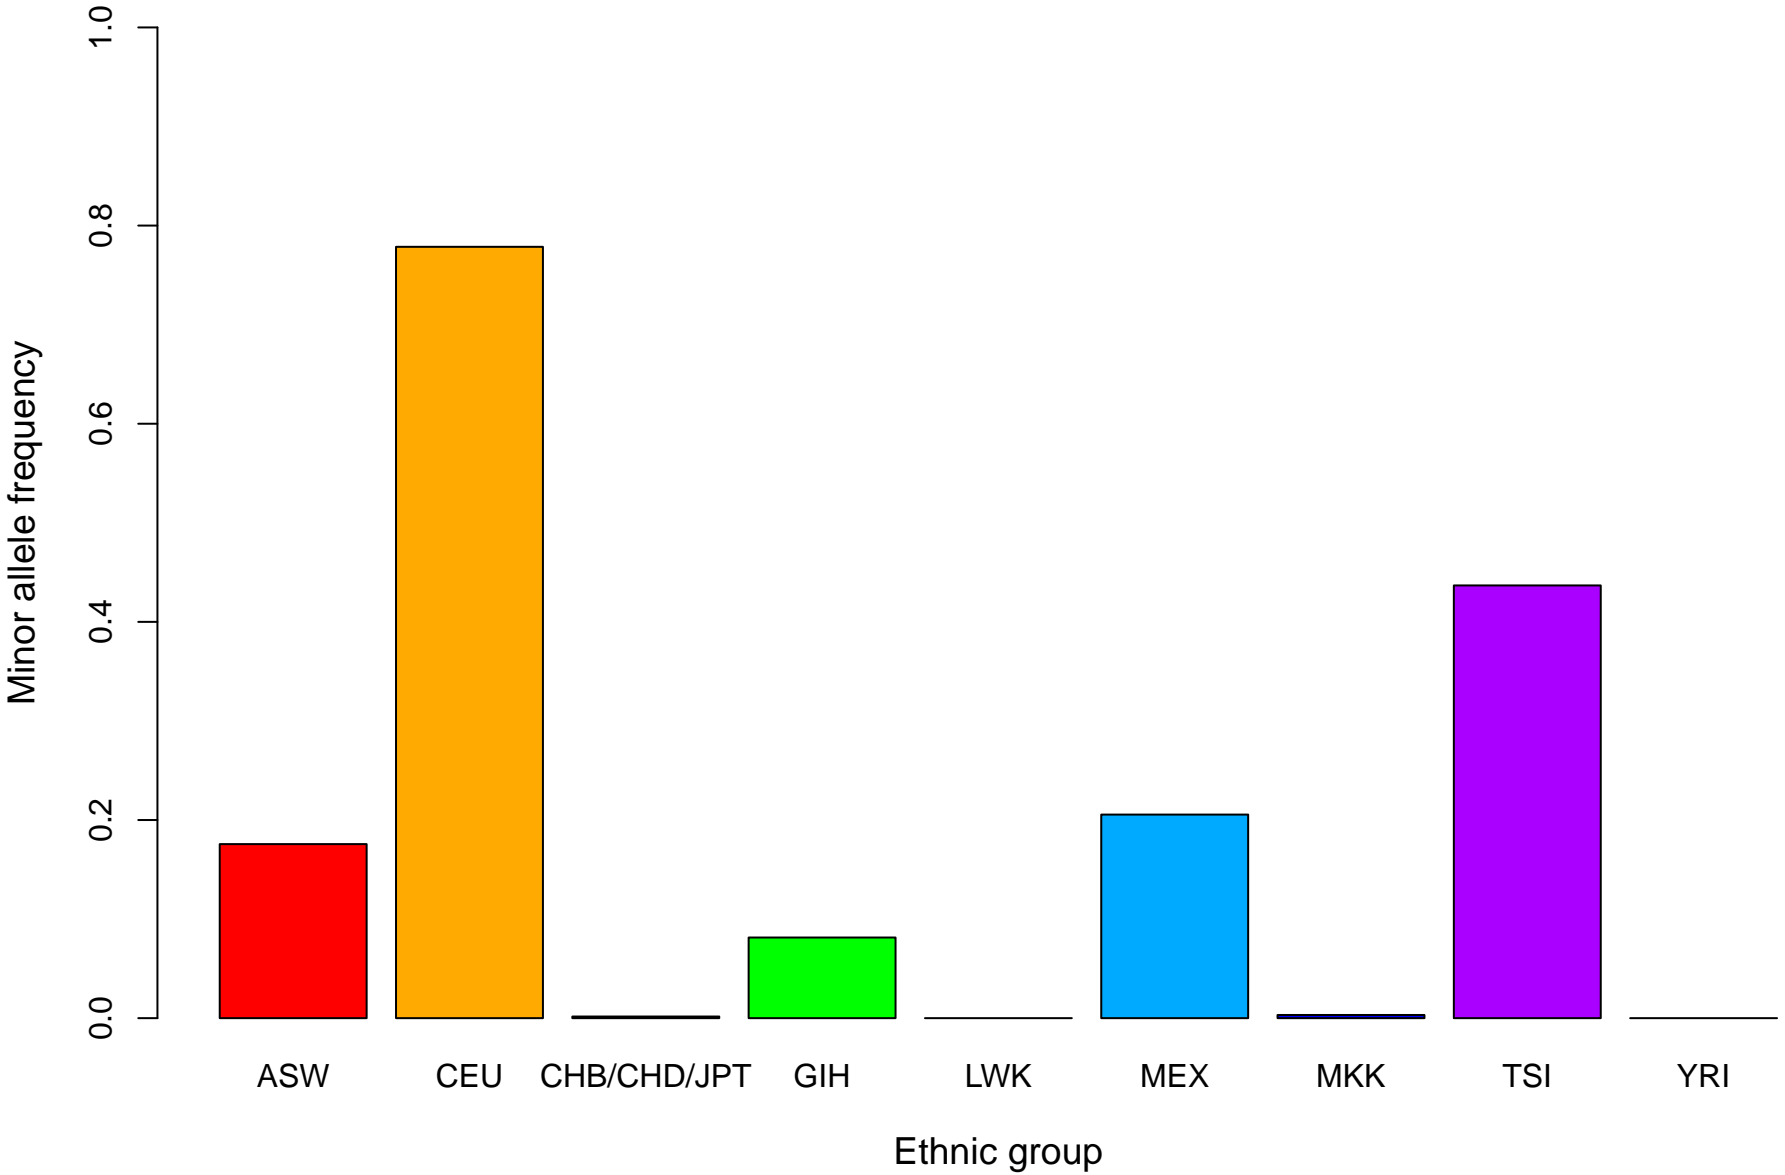

# rs6001762\_T

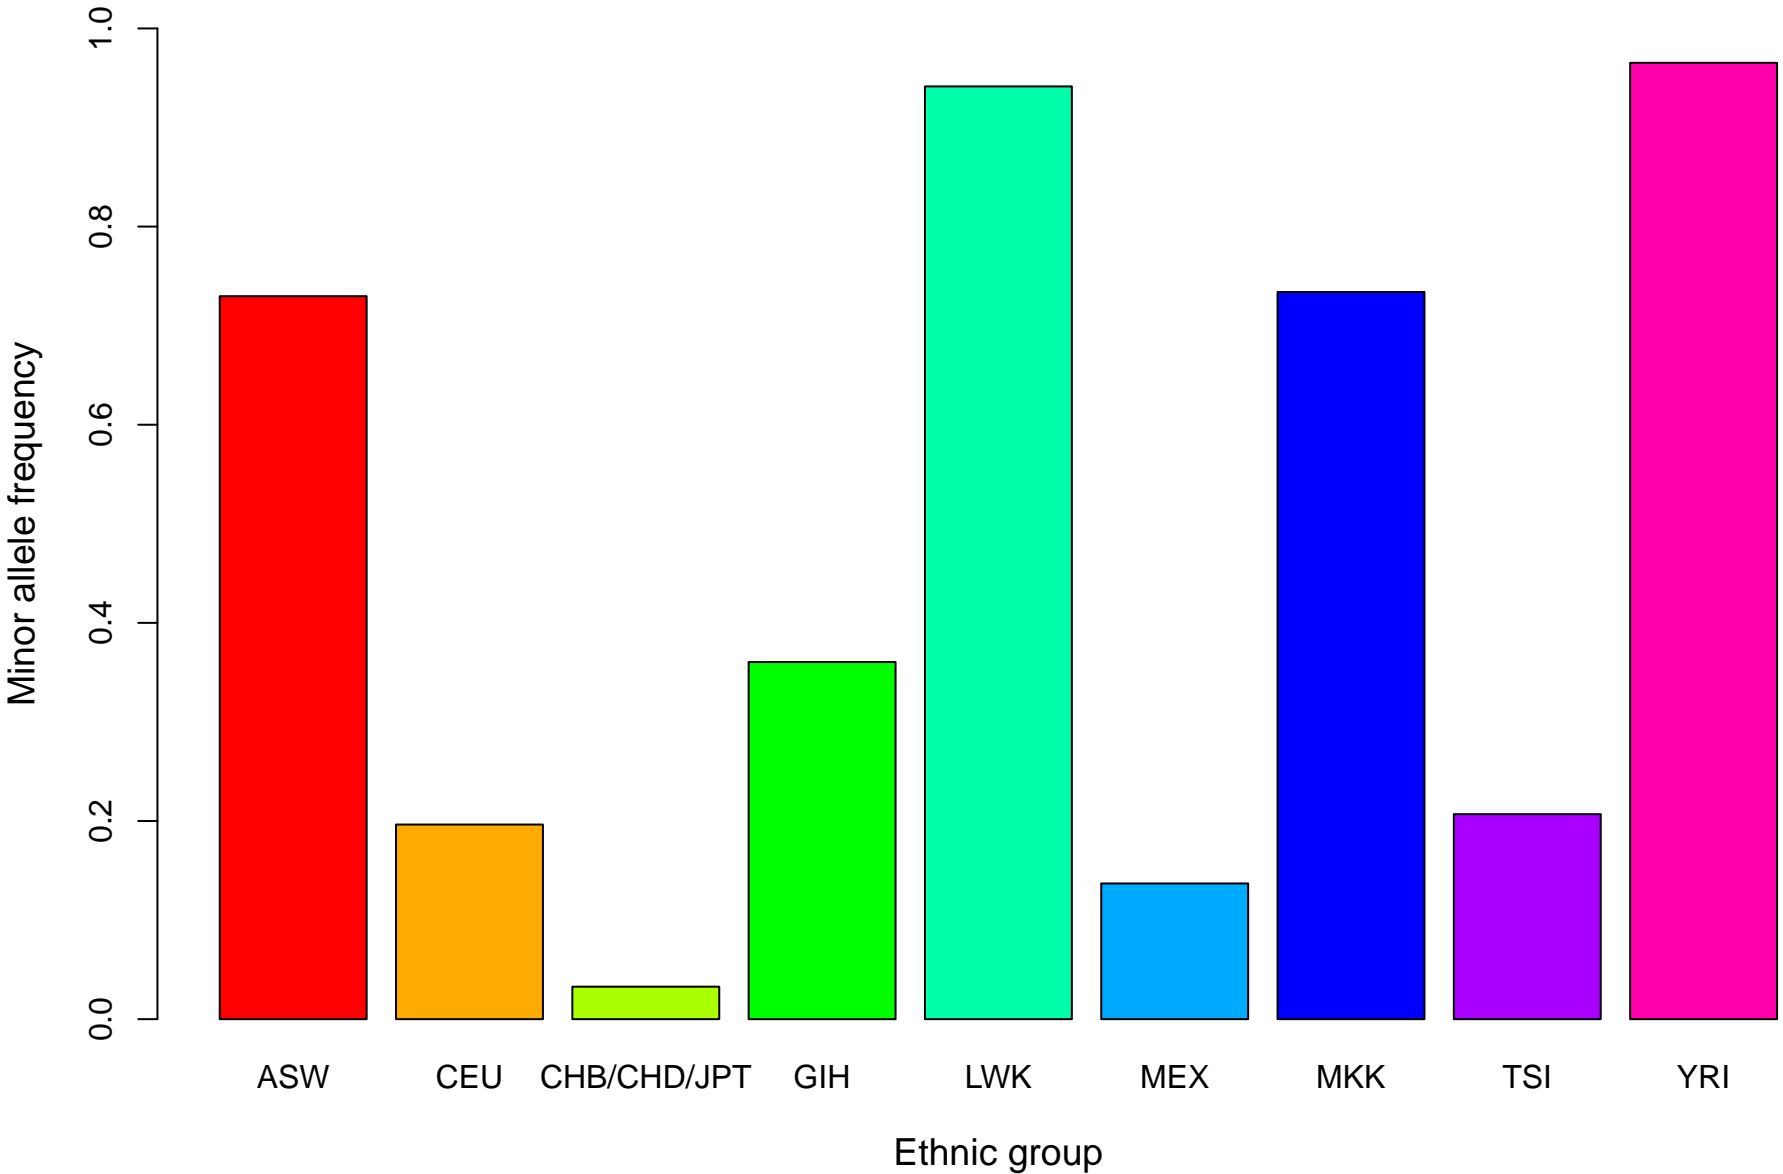

# rs10766575\_C

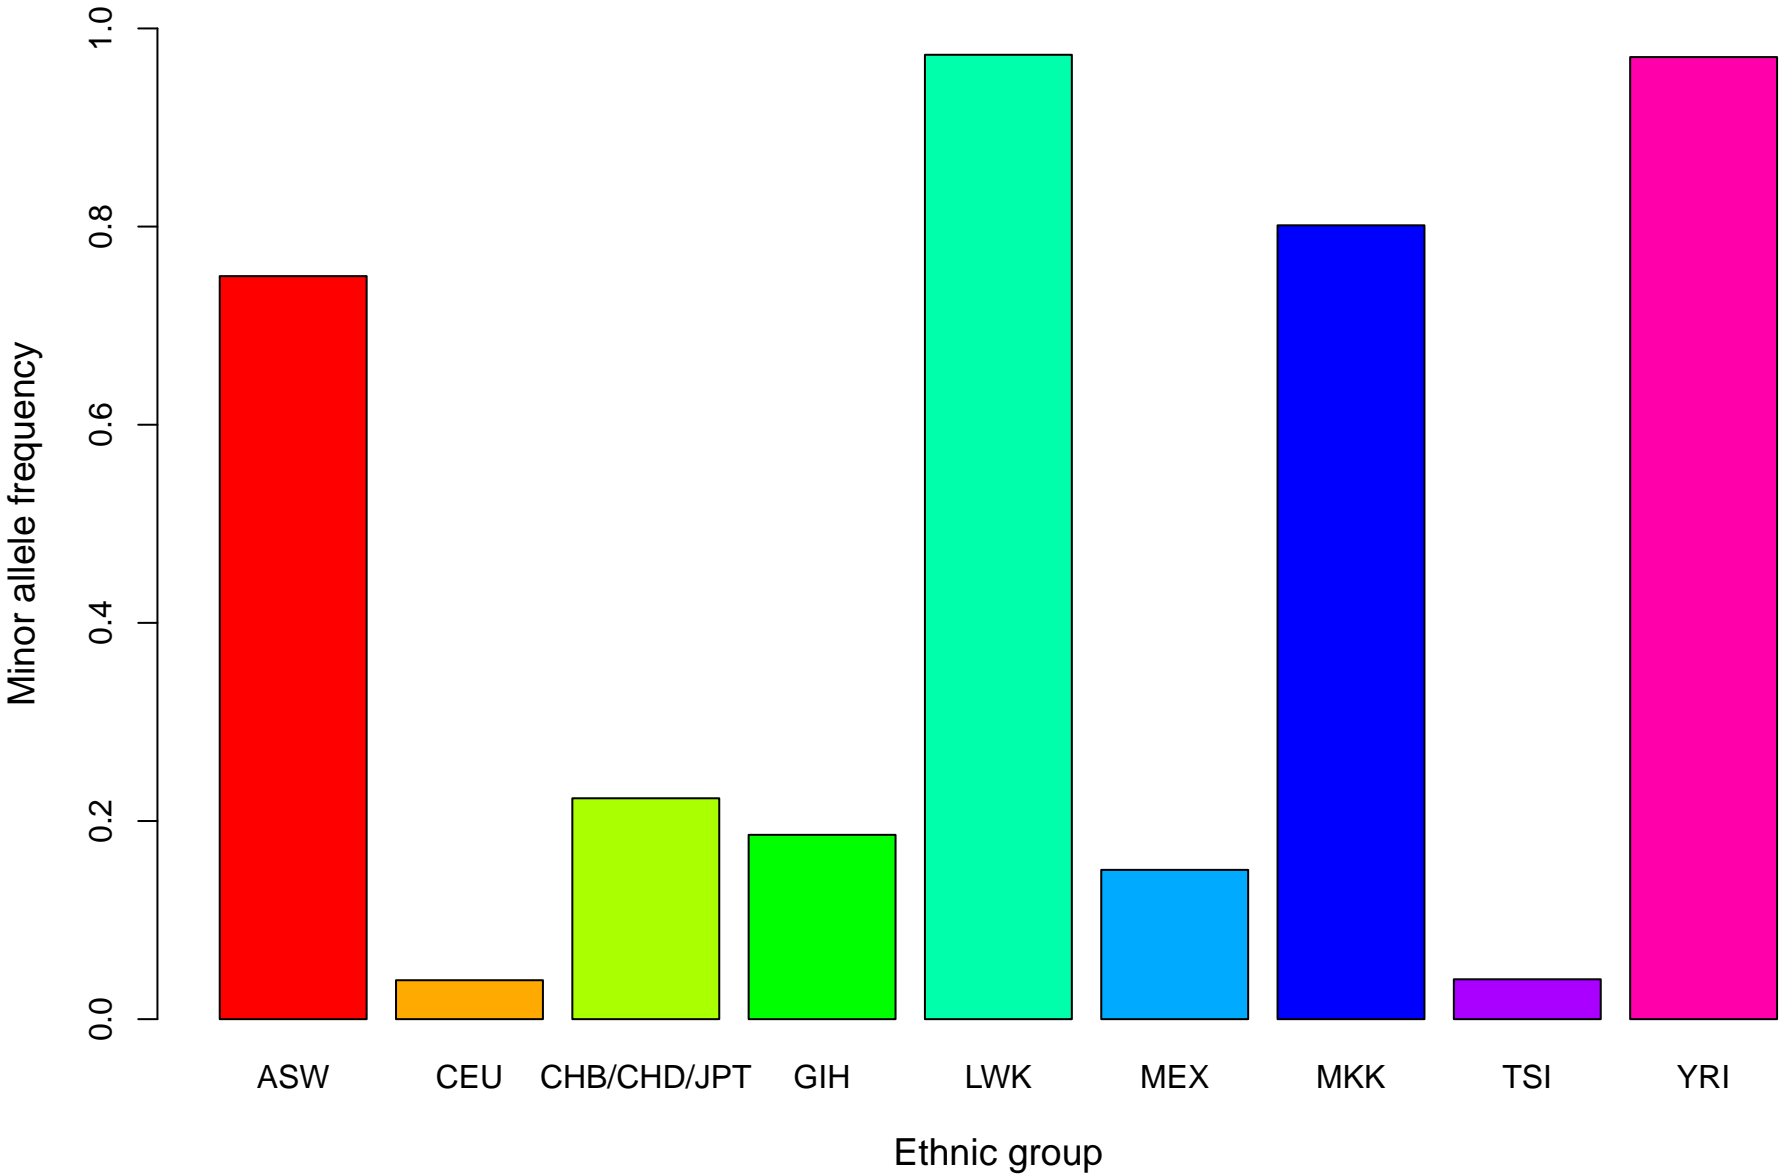

# rs7136062\_A

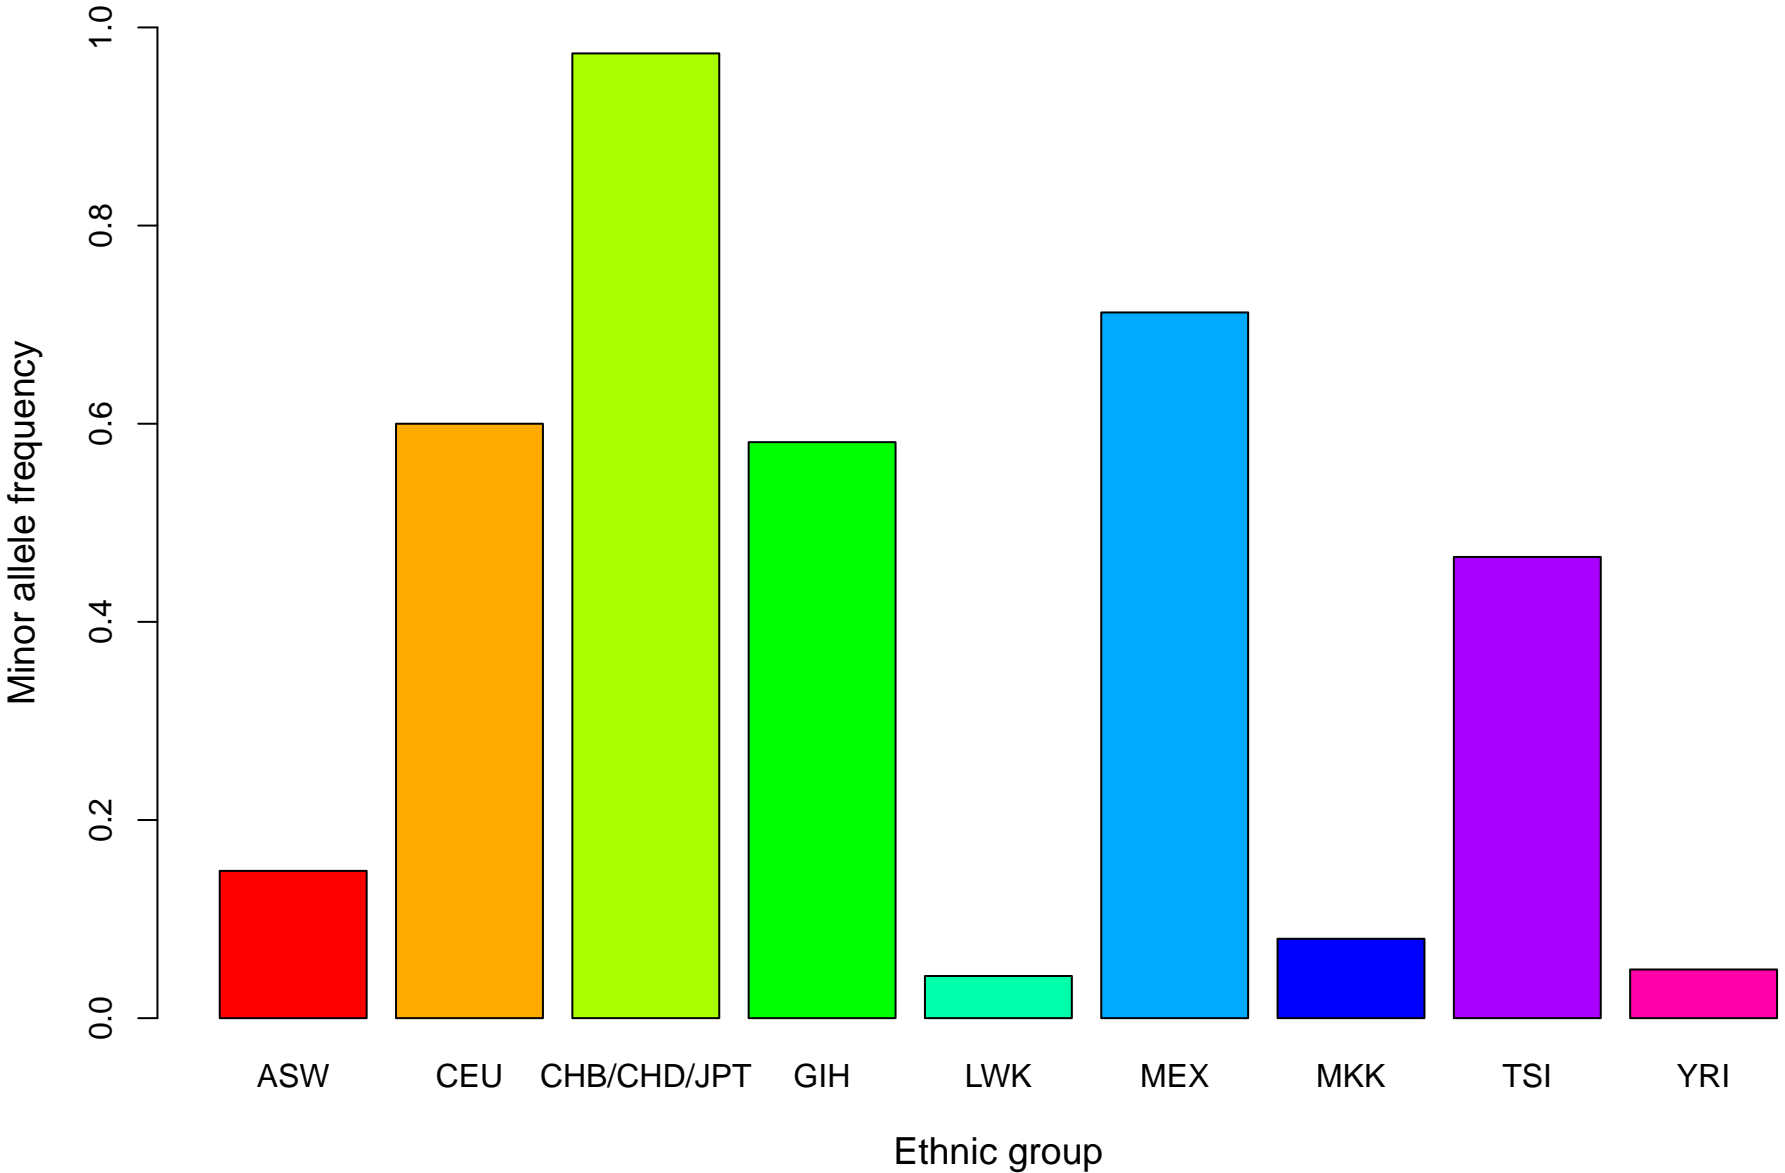

# rs6546753\_T

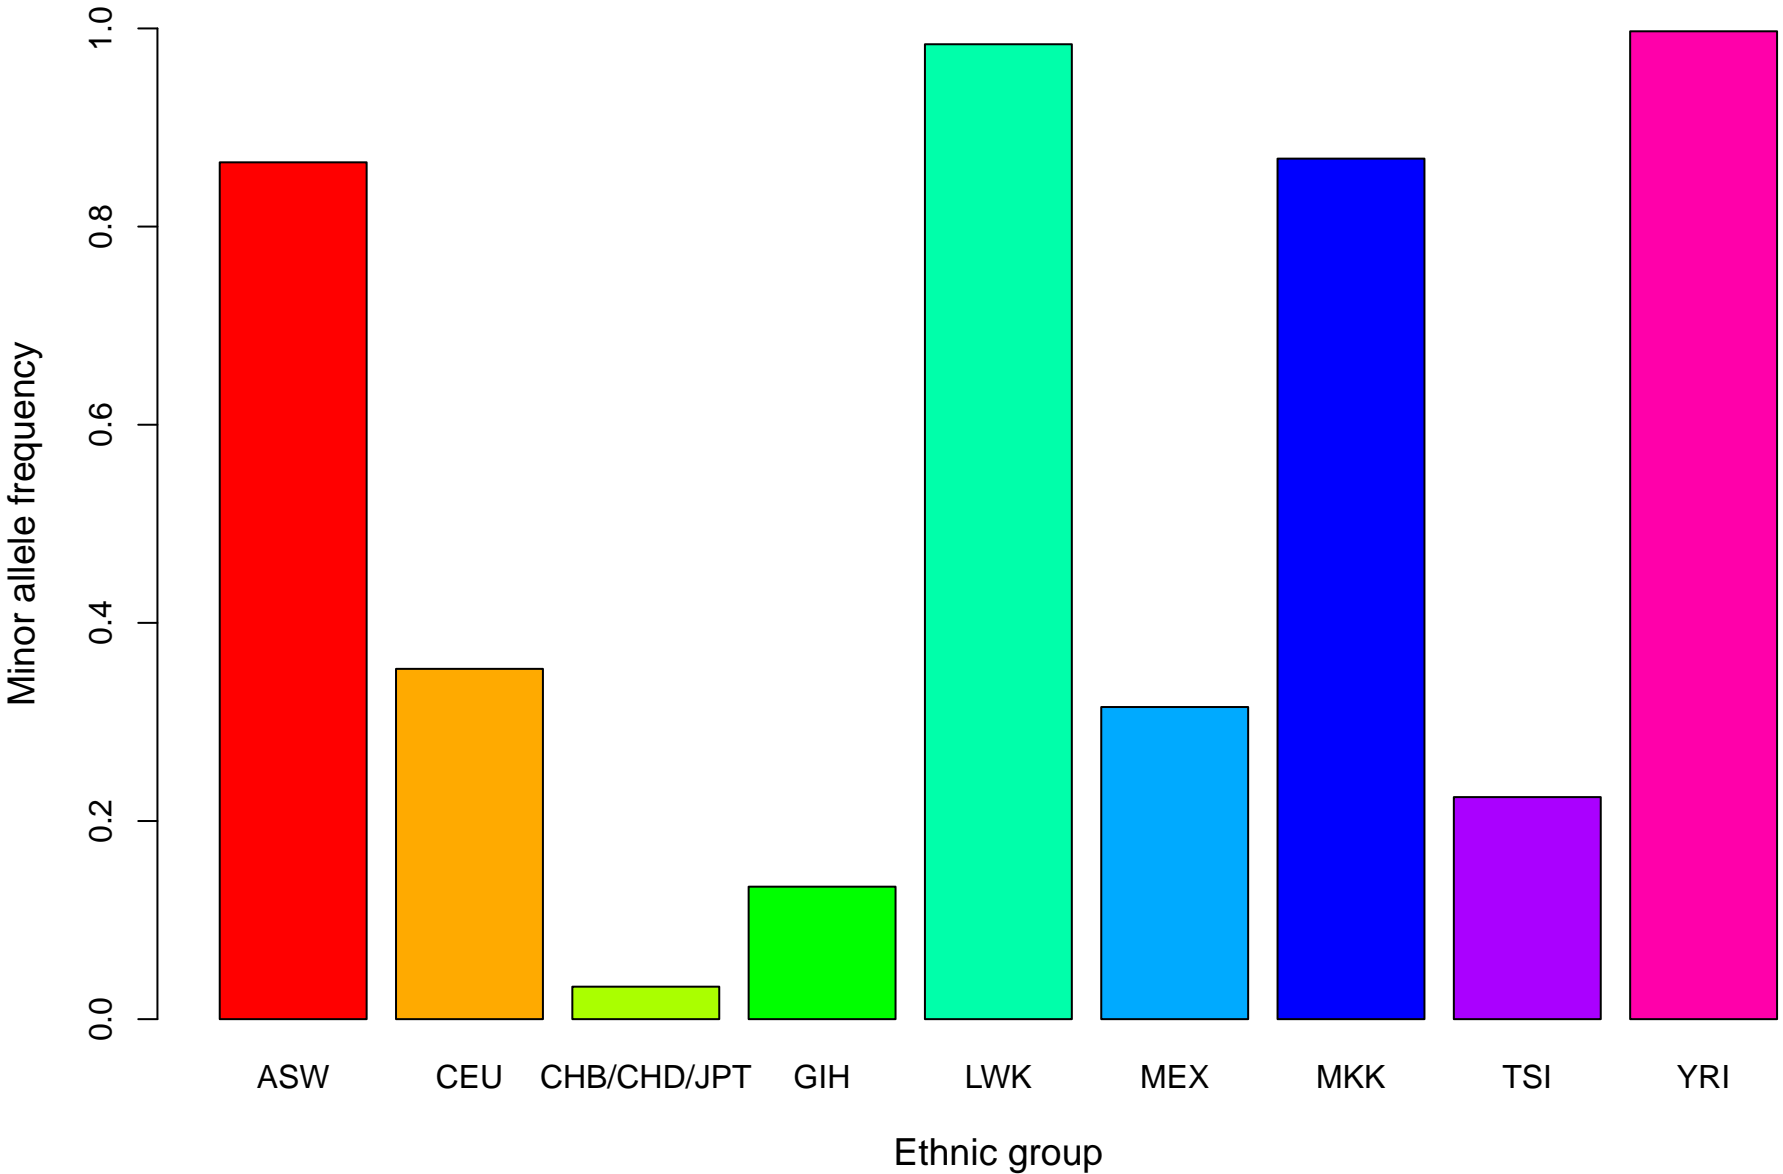

# rs6475067\_C

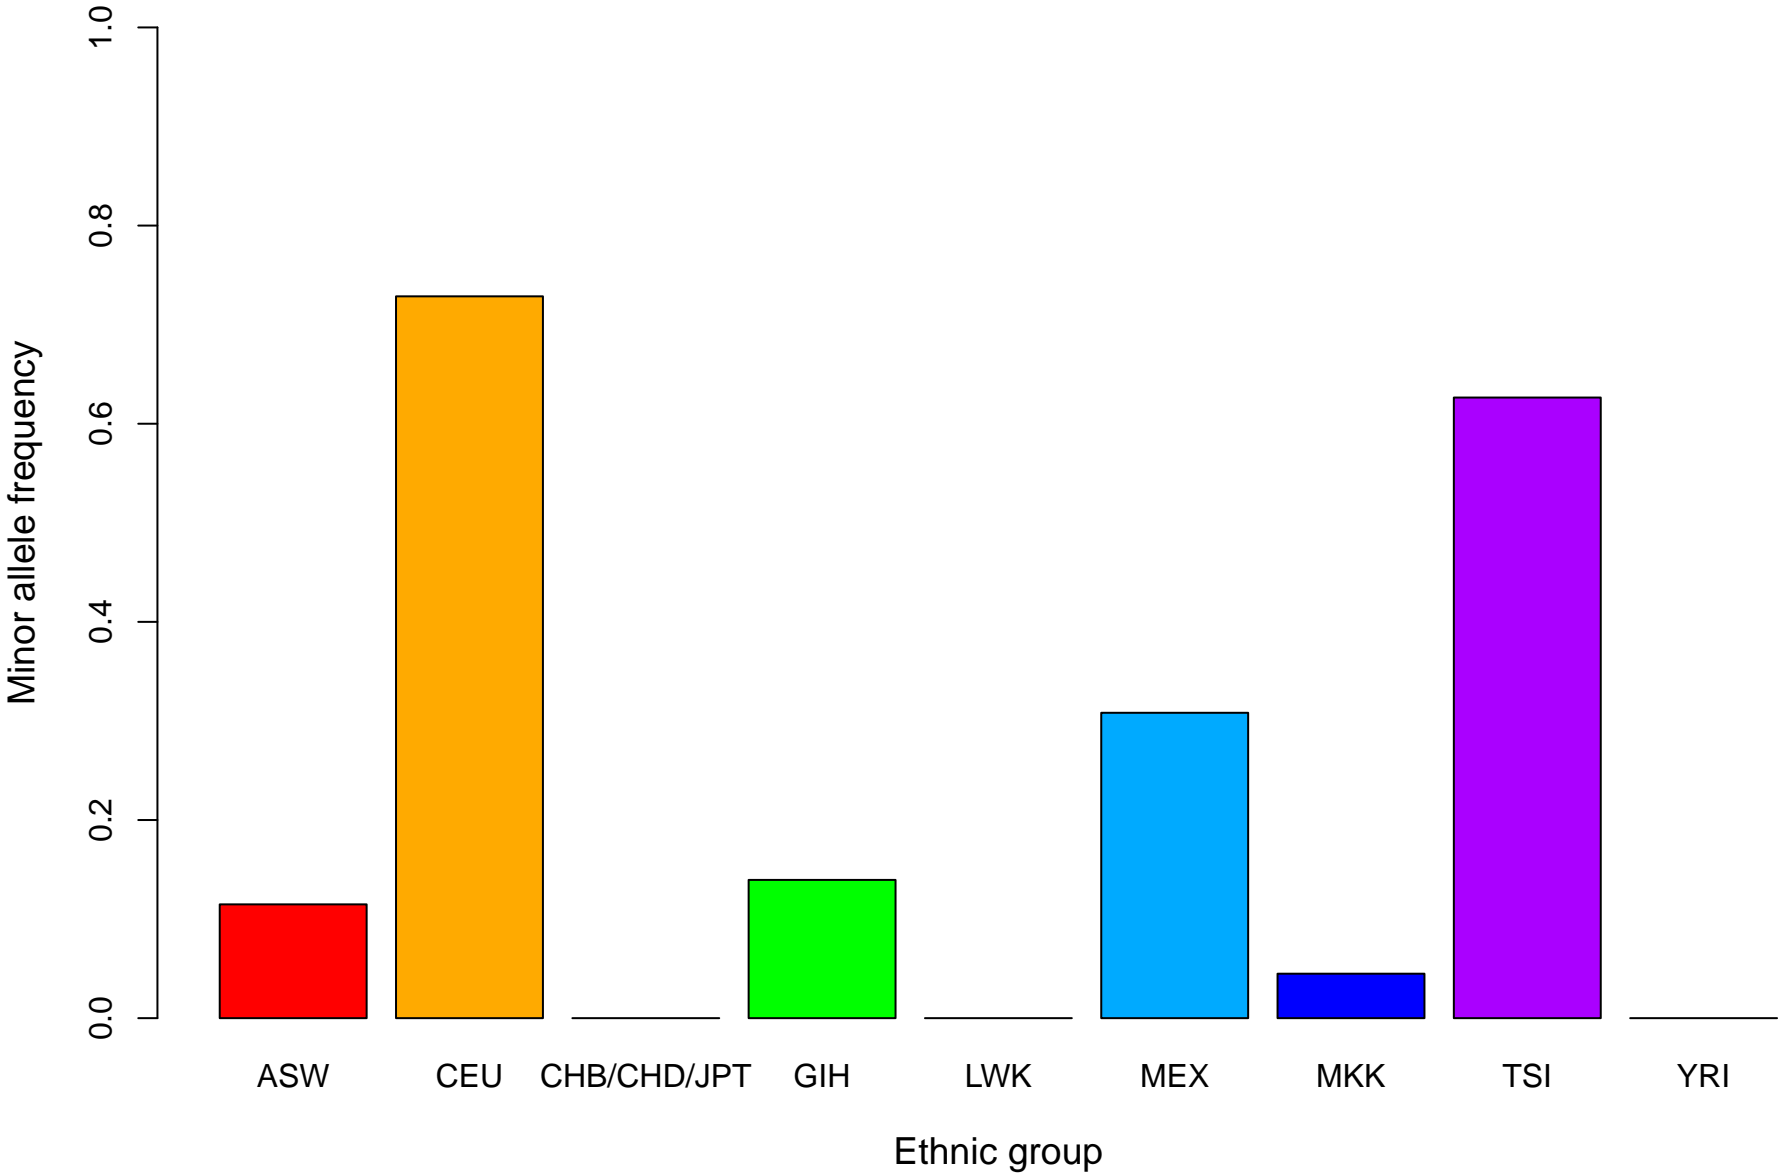

# rs9933843\_T

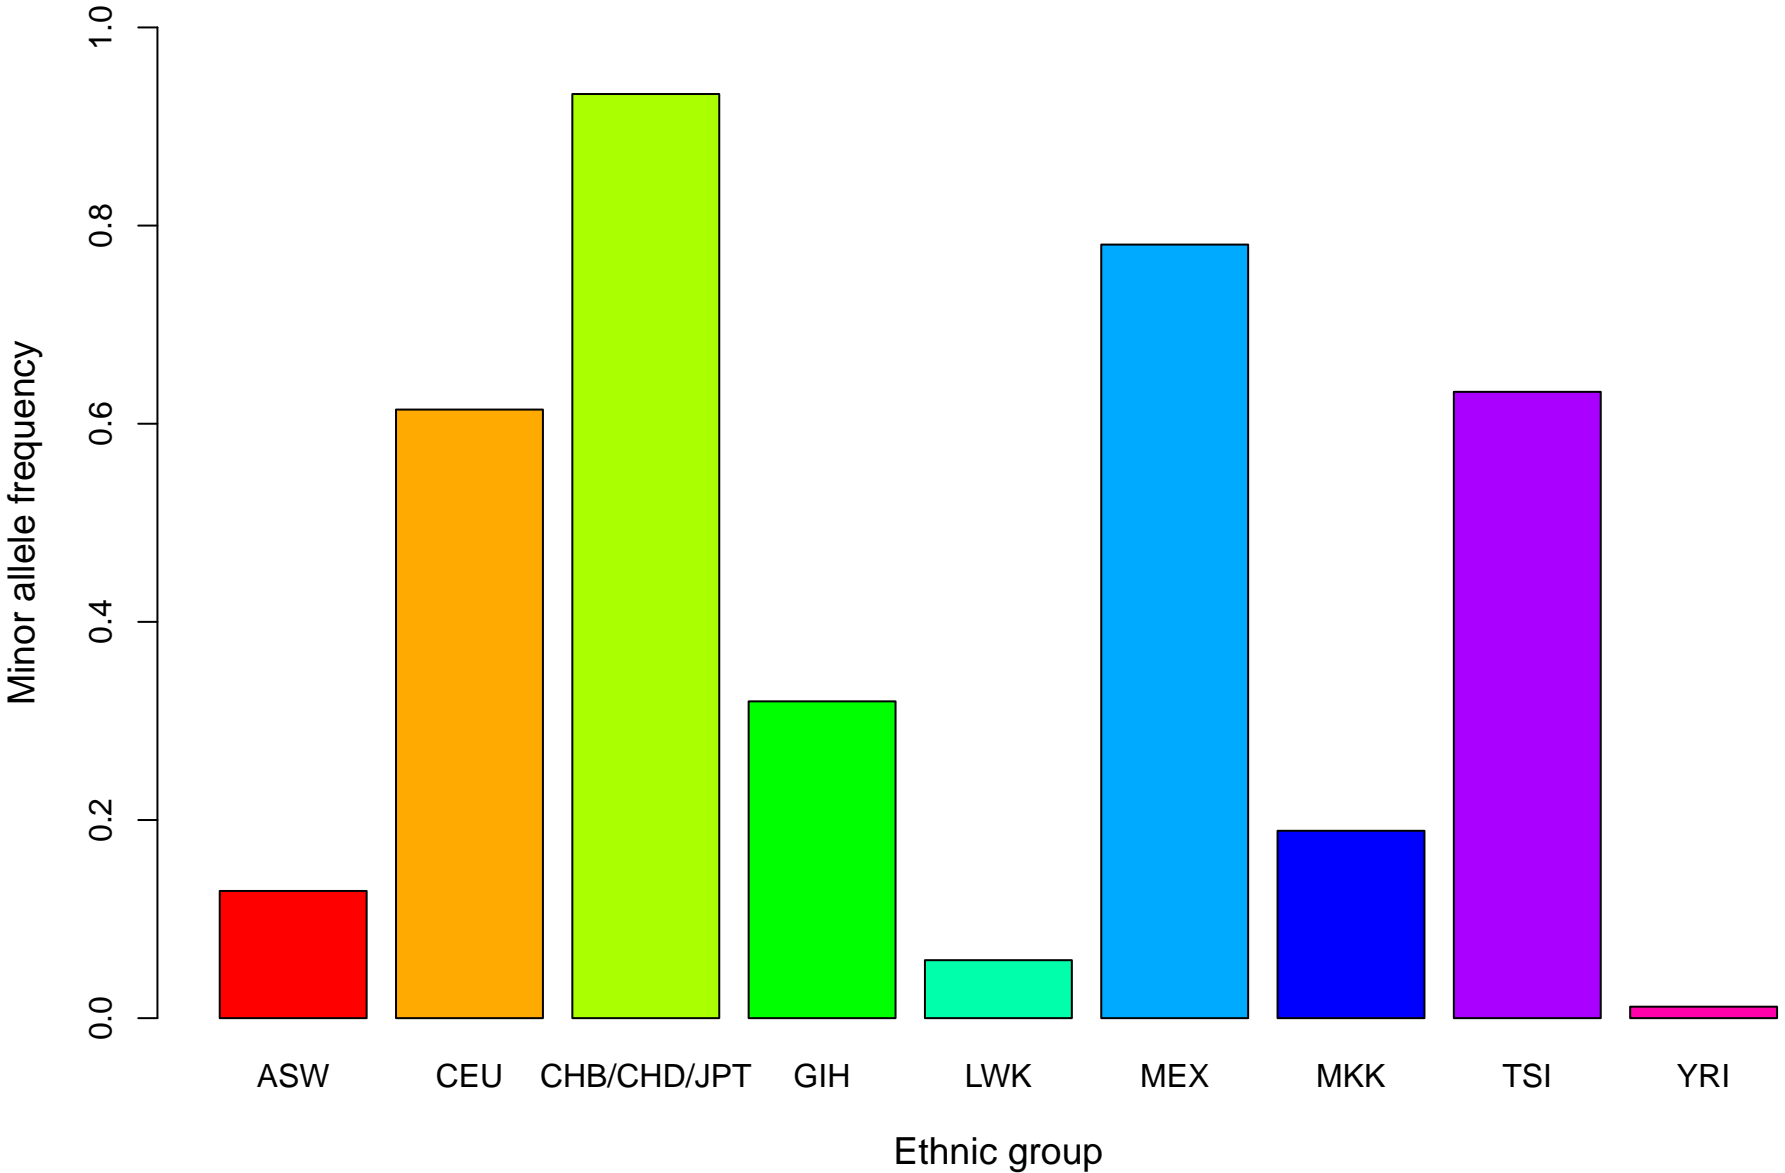



# rs853975\_T

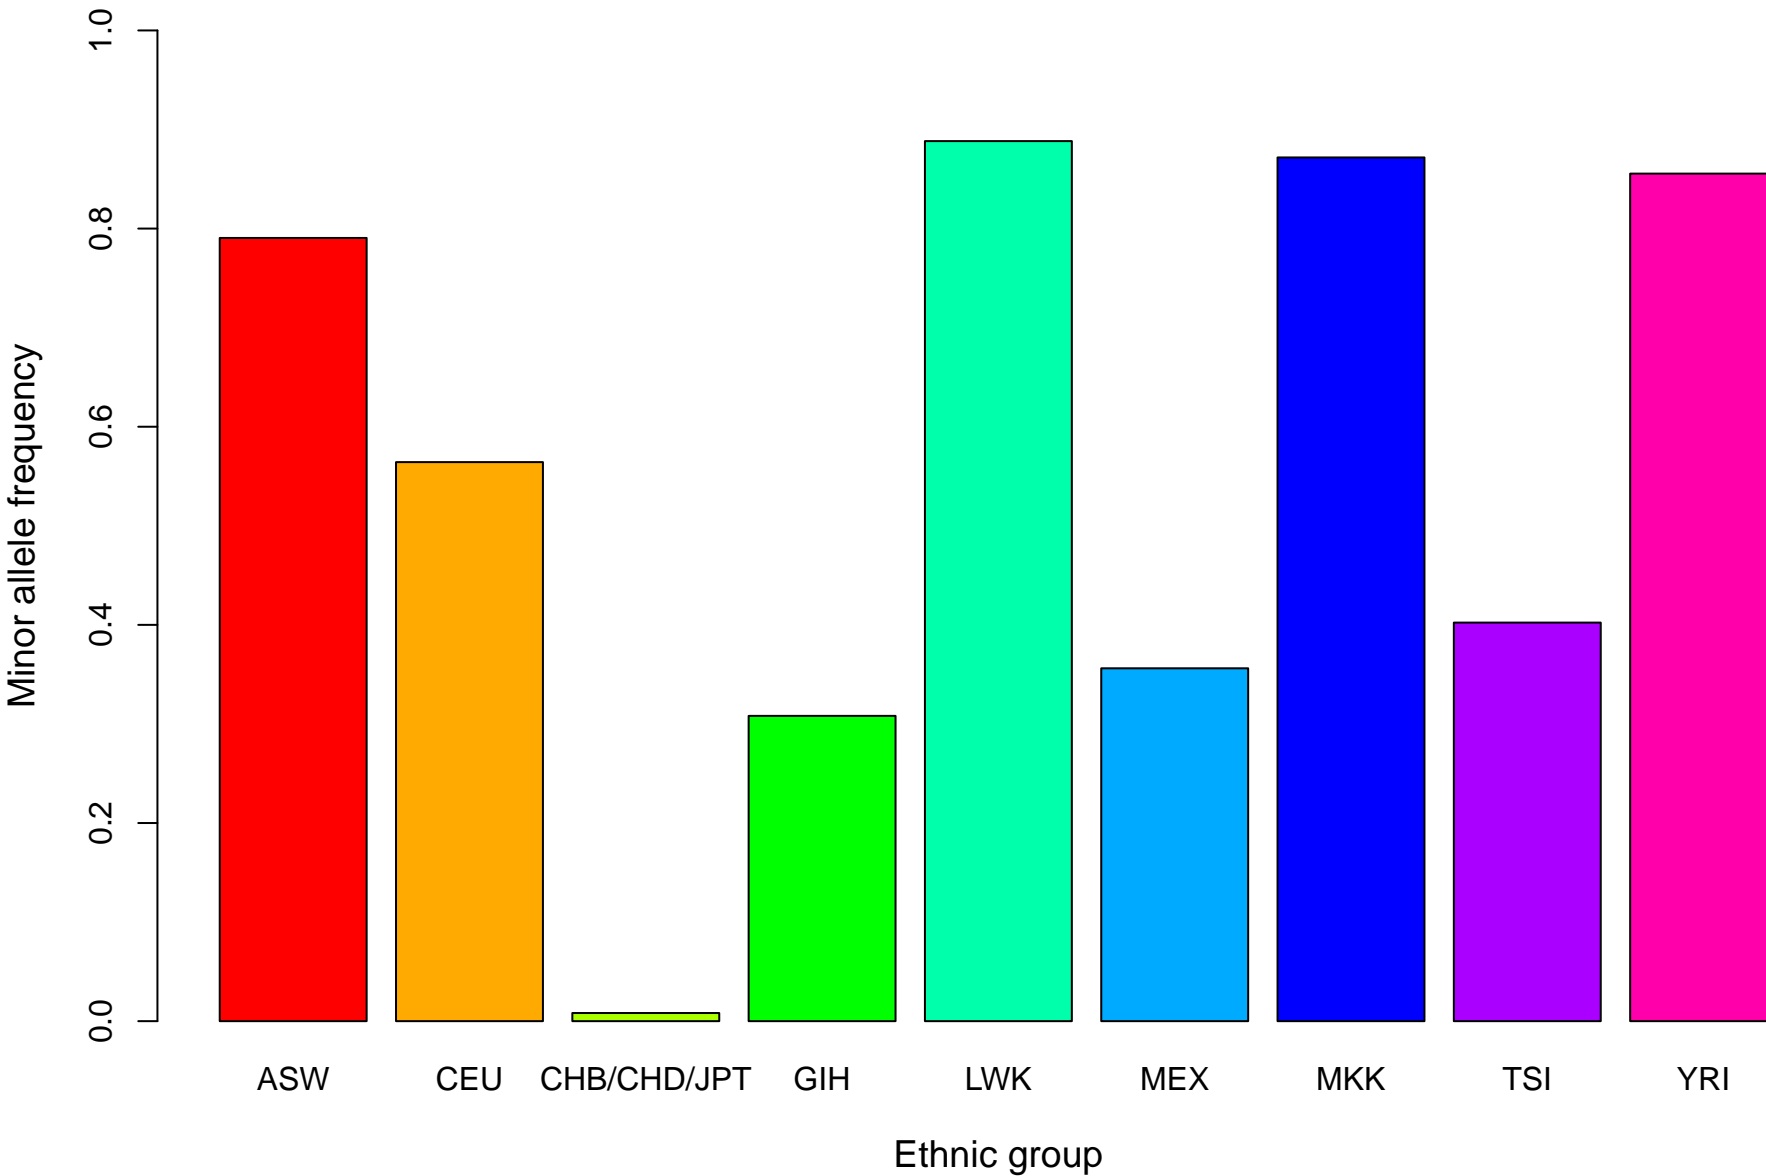

# rs4737753\_C

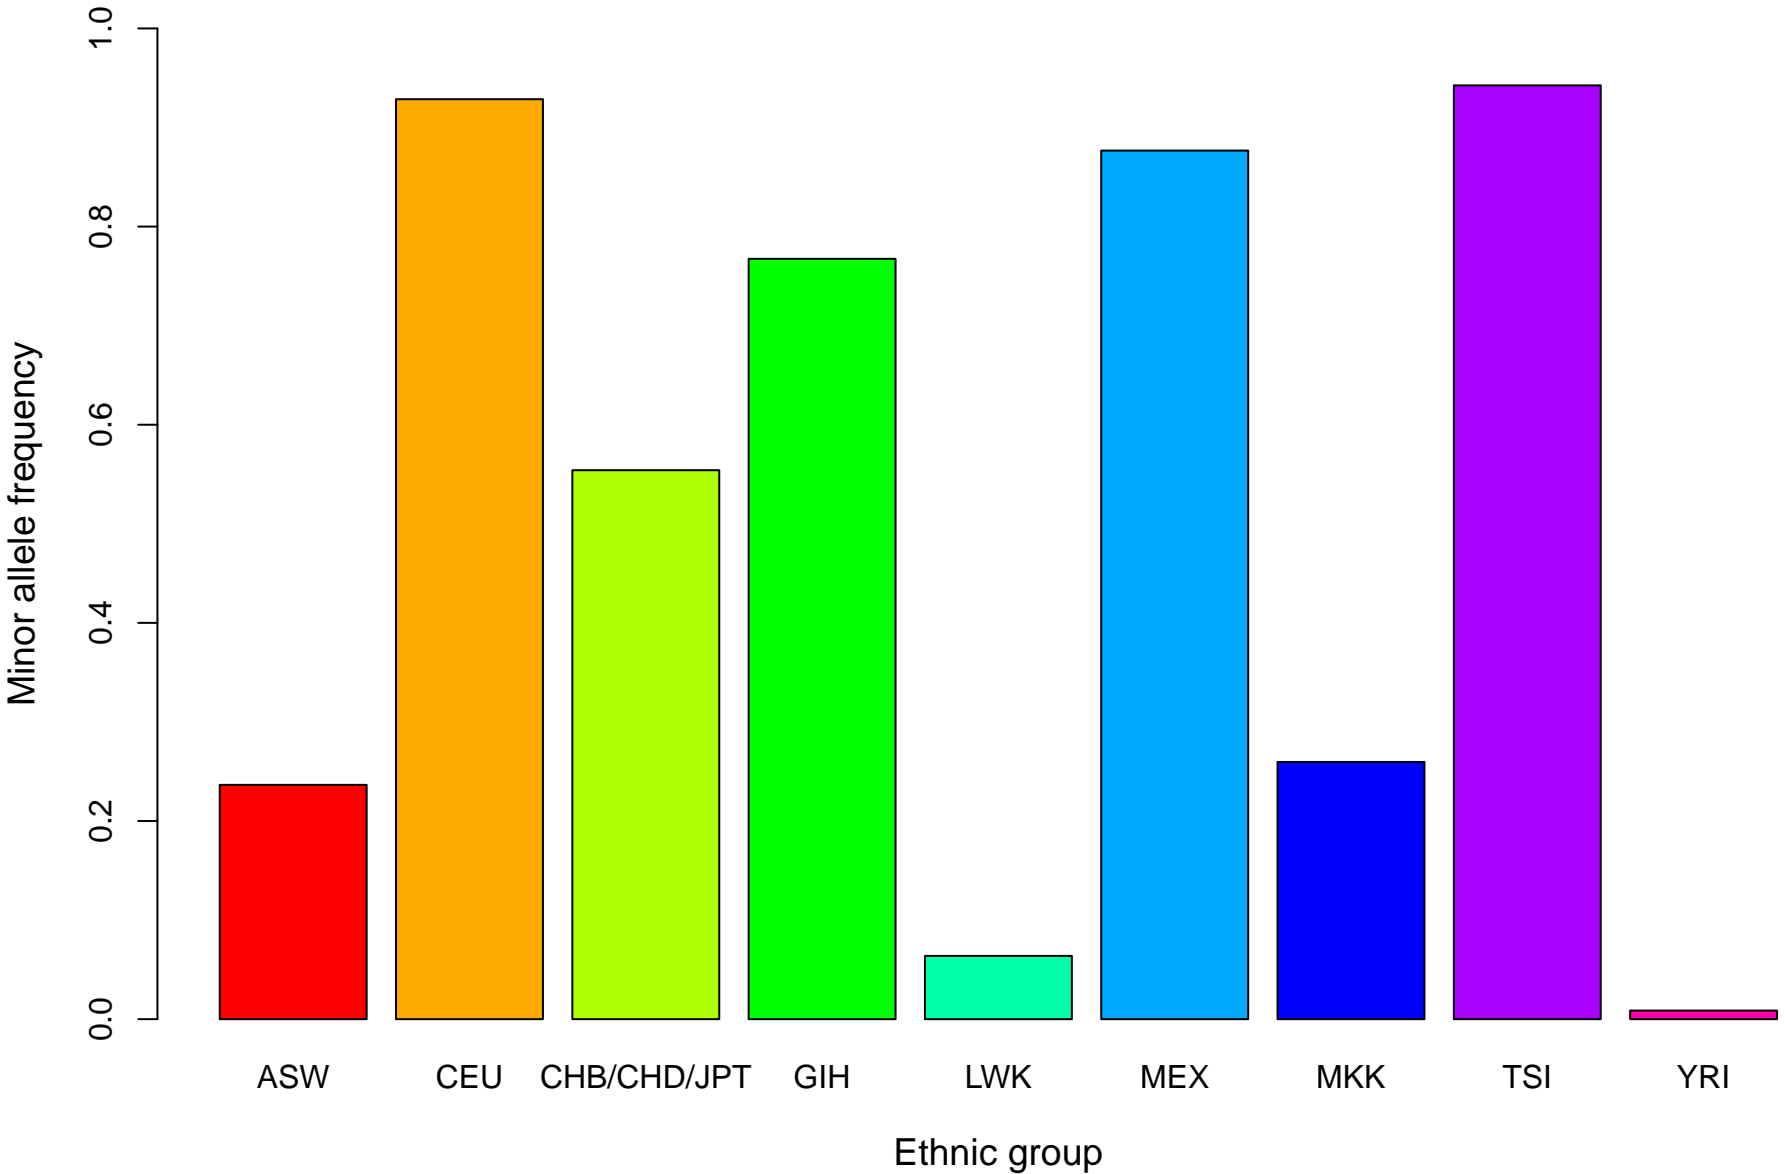

# rs1113669\_C

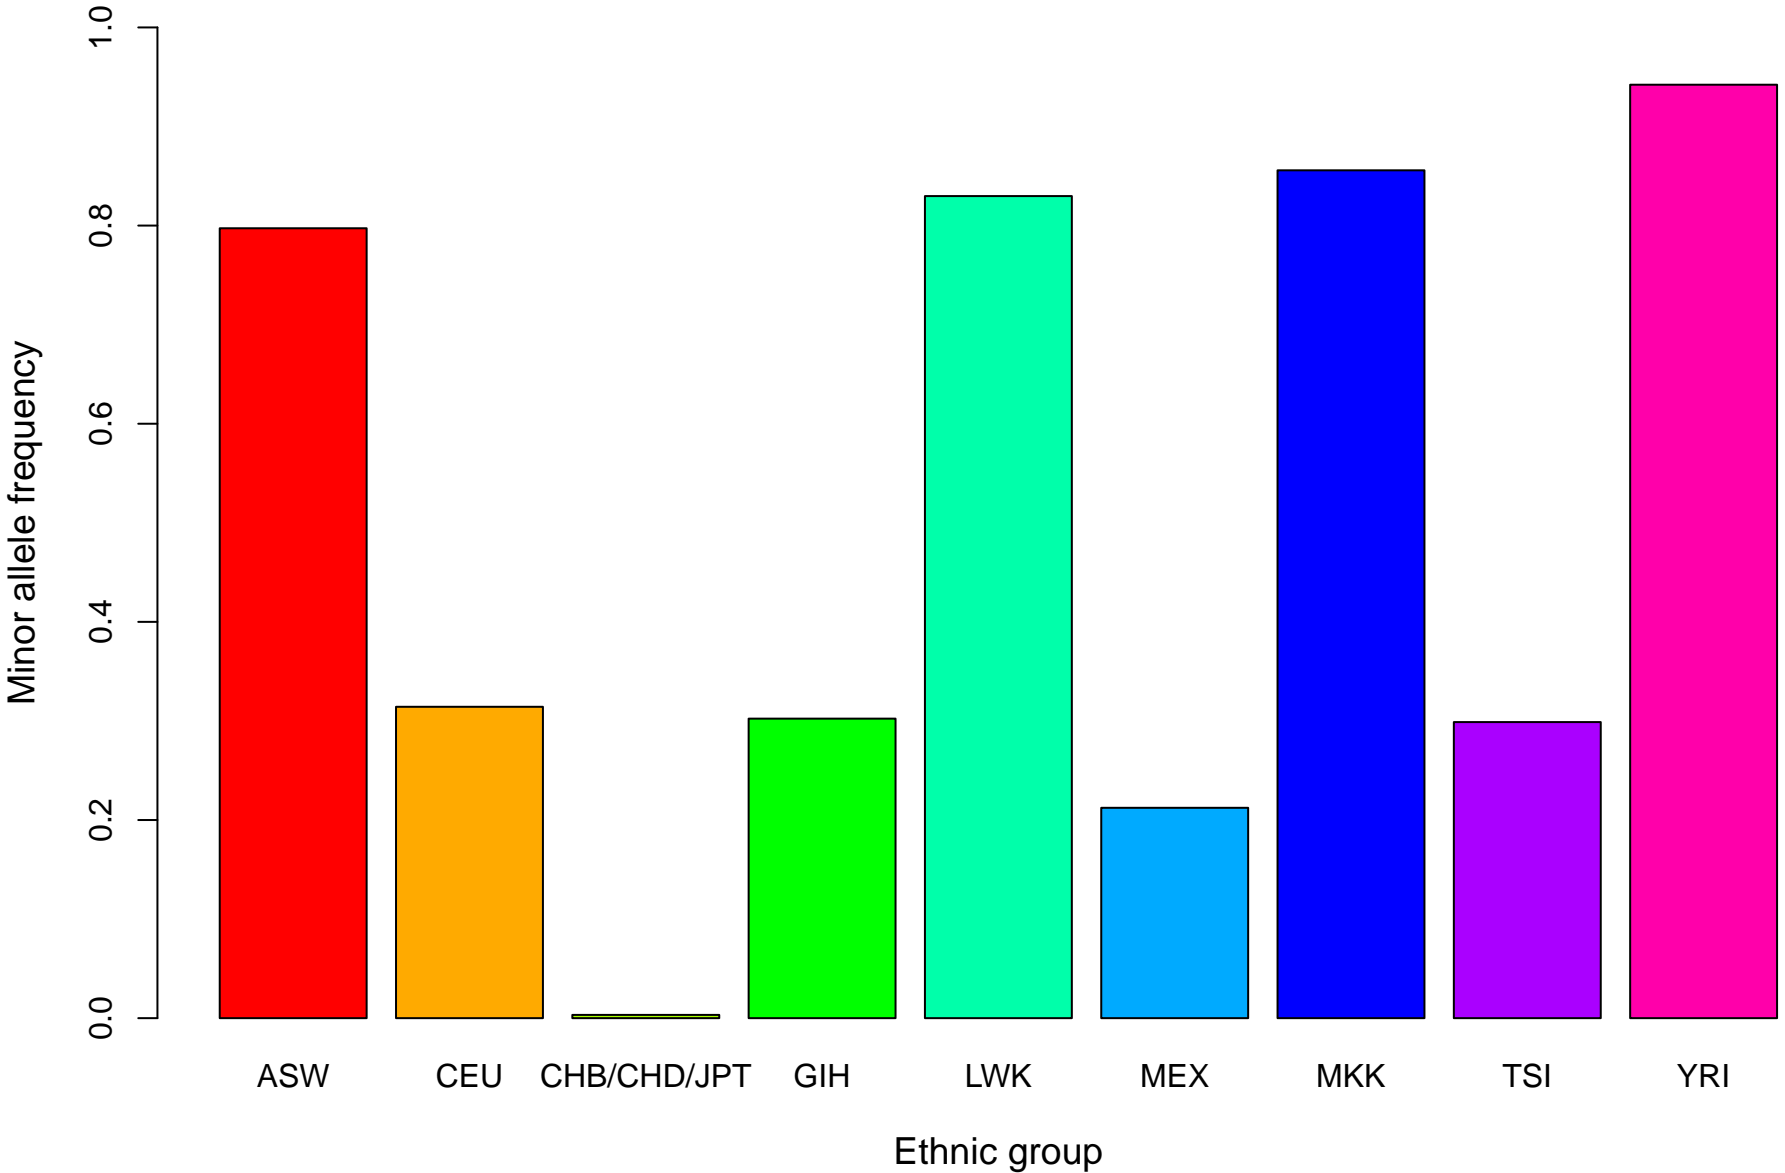

# rs478890\_A

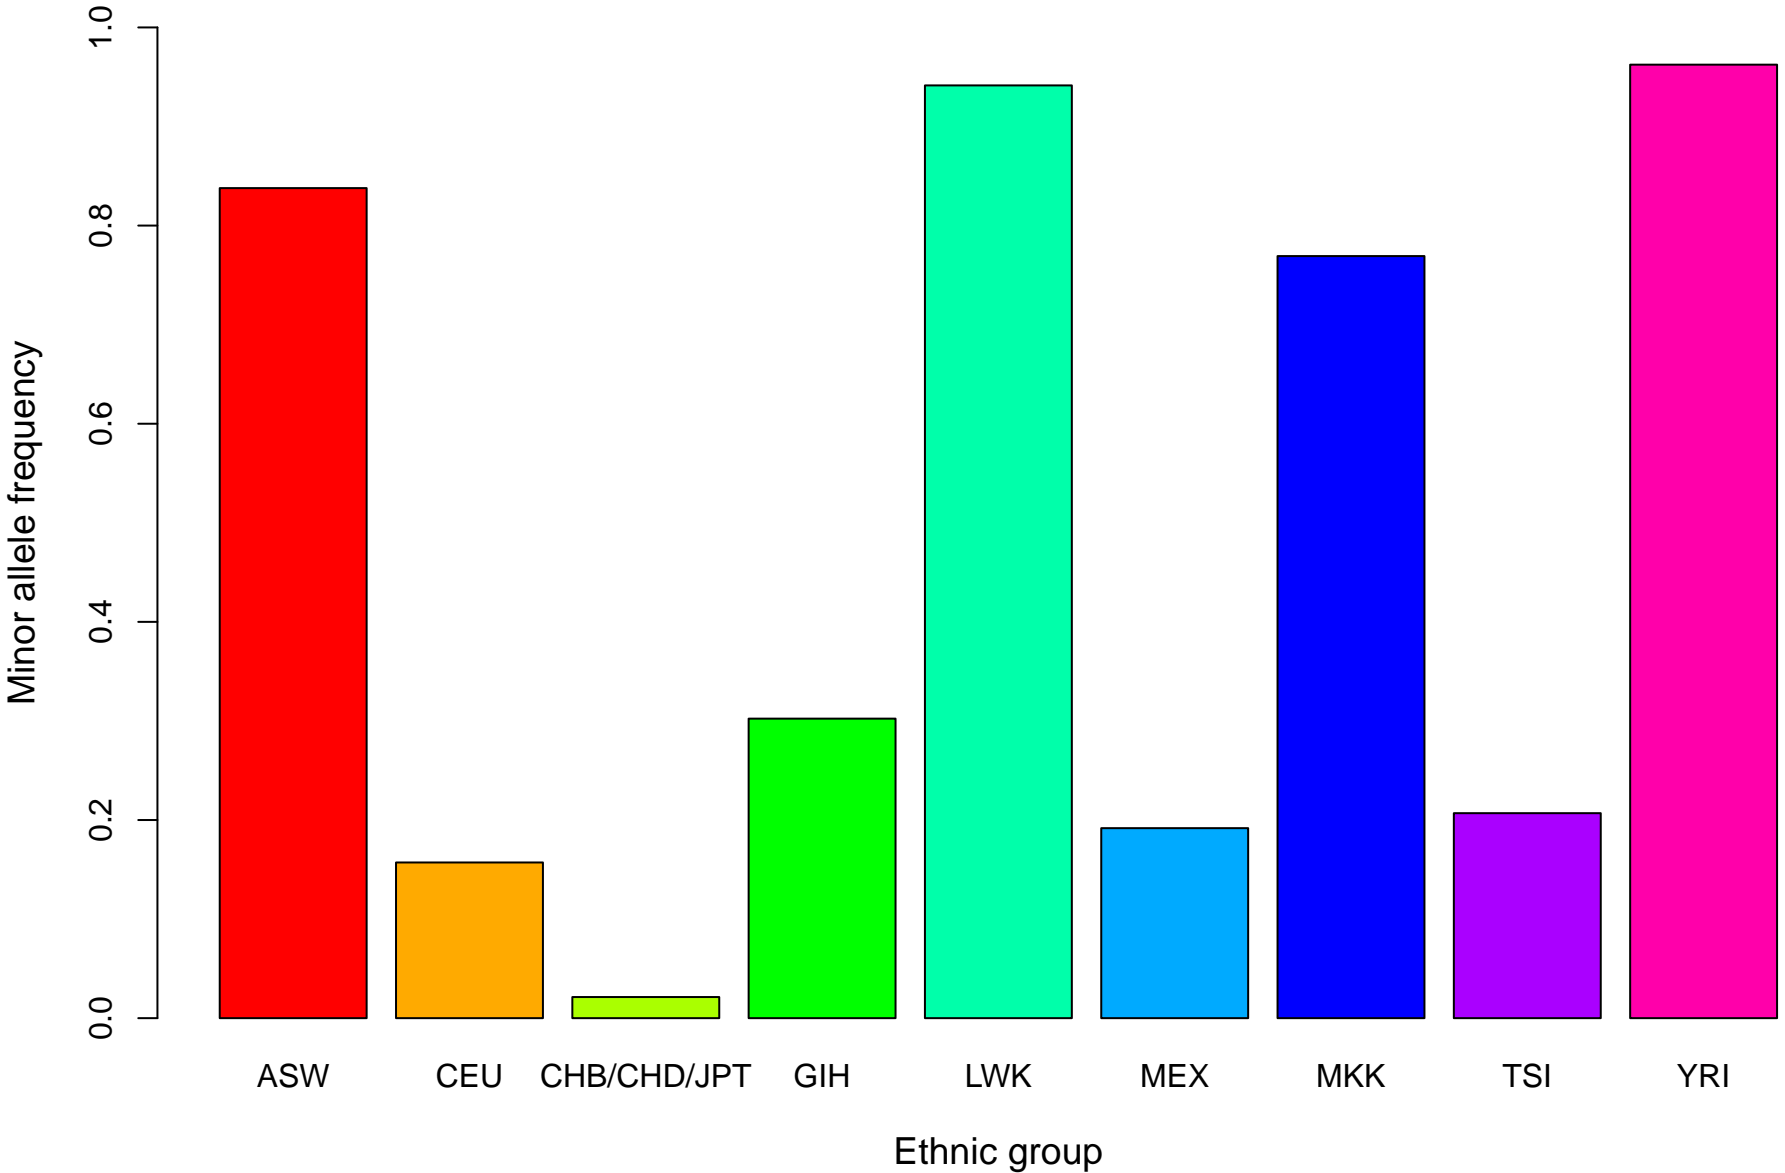

# rs7854707\_A

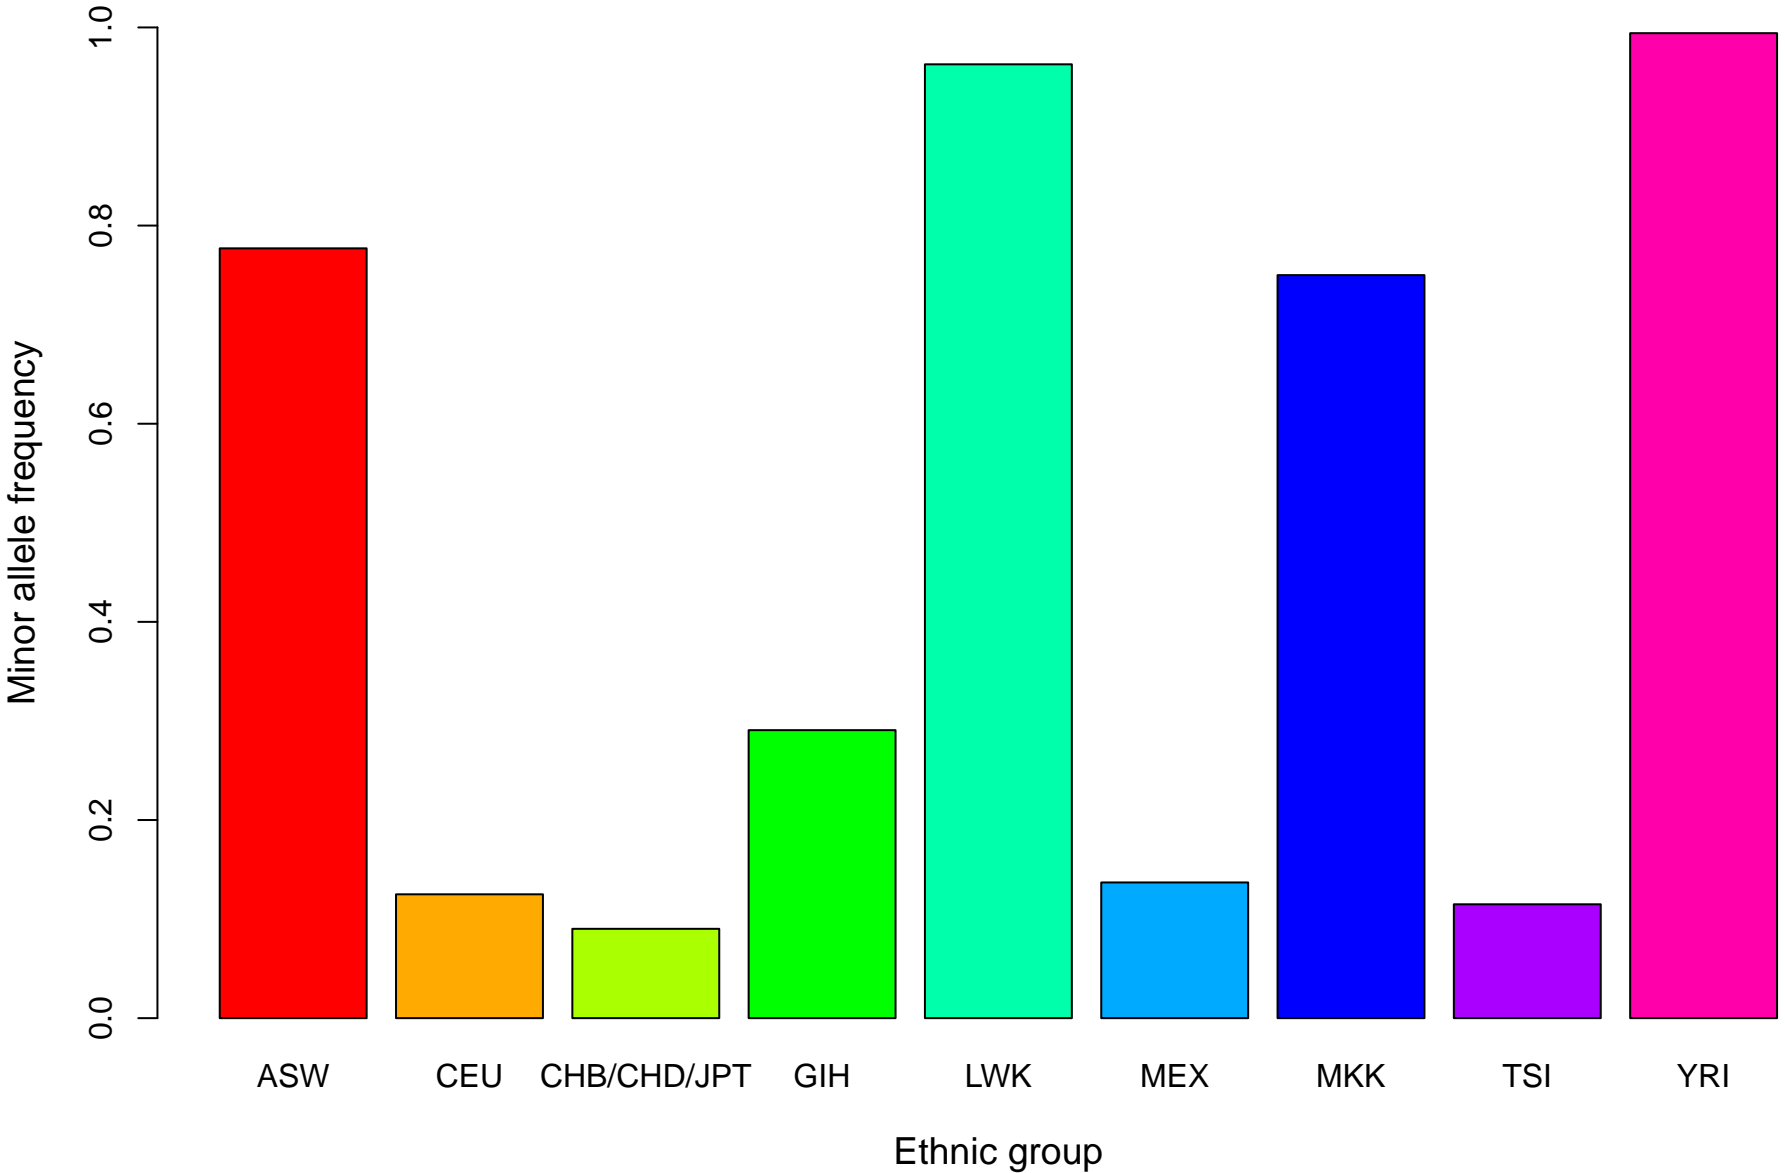

# rs6660884\_T

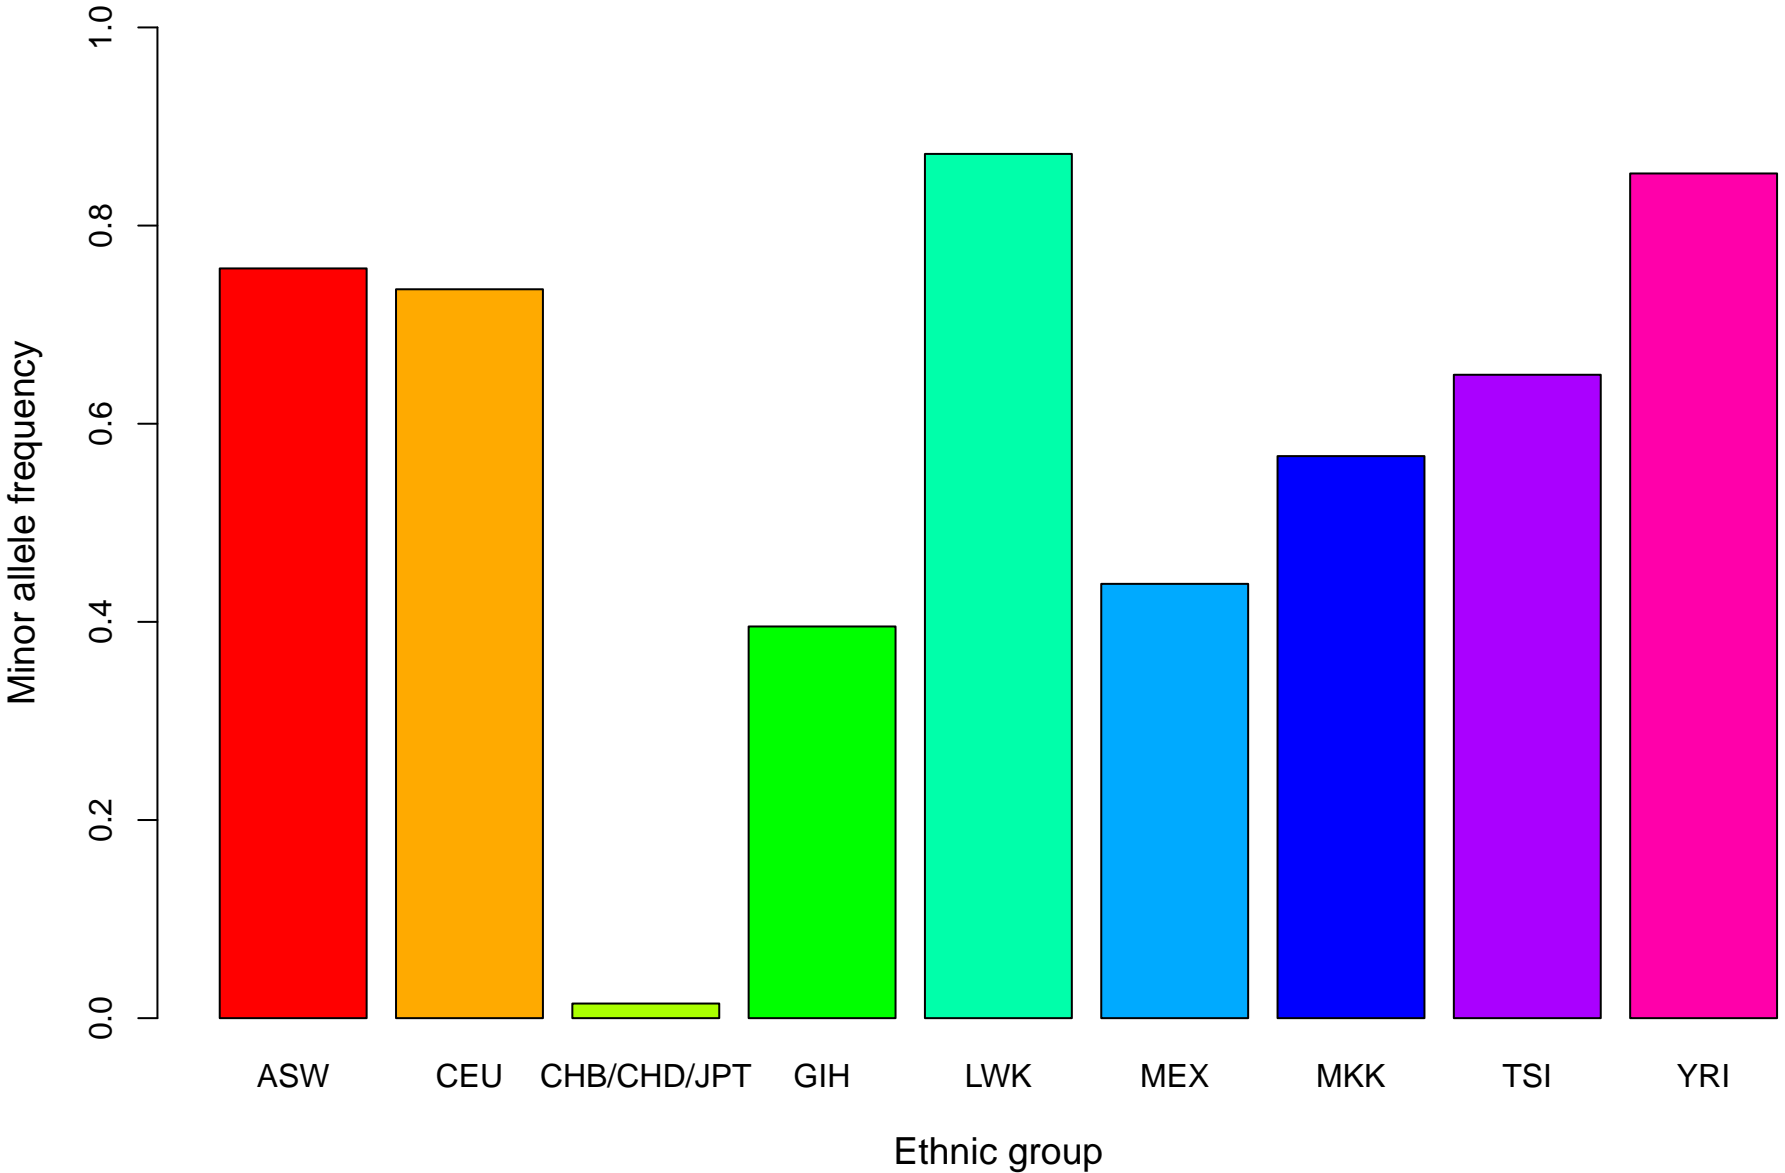

# rs2553449\_C

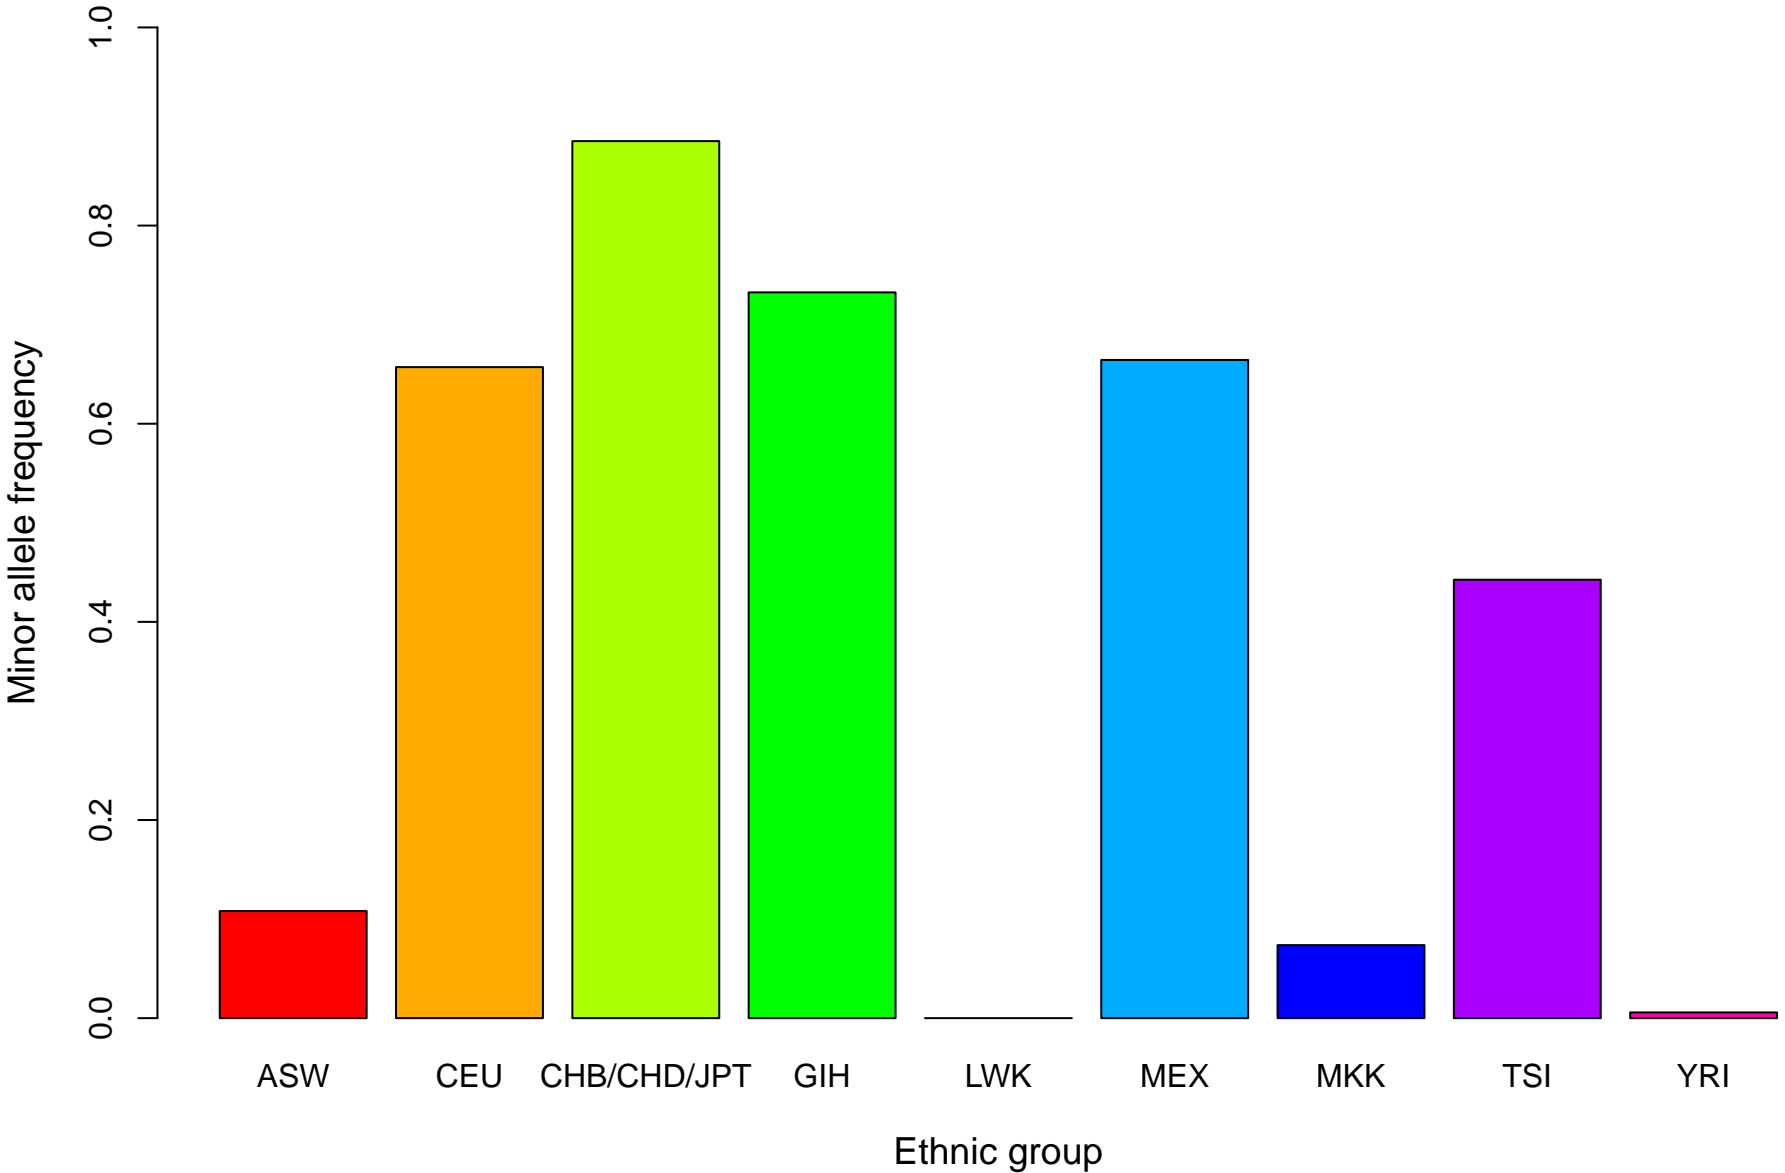

# rs910360\_C

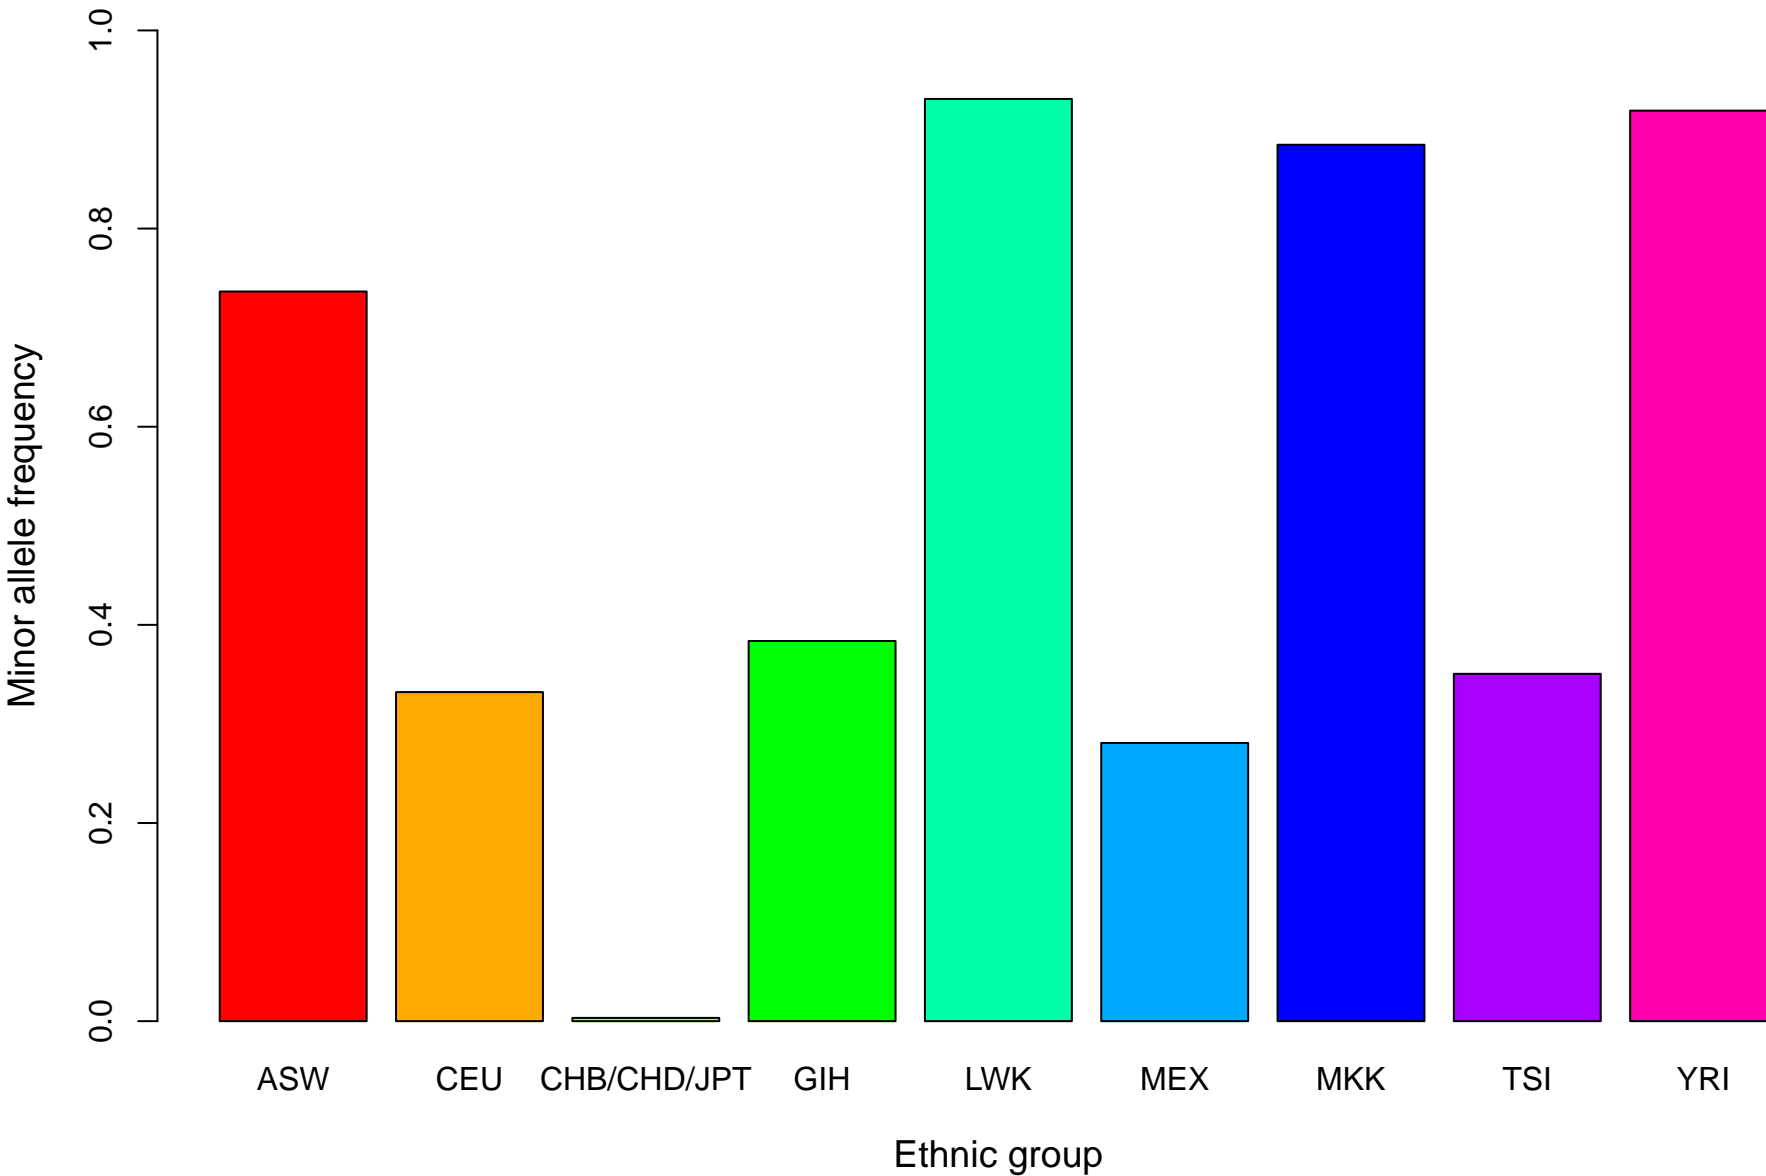



# rs2493398\_A

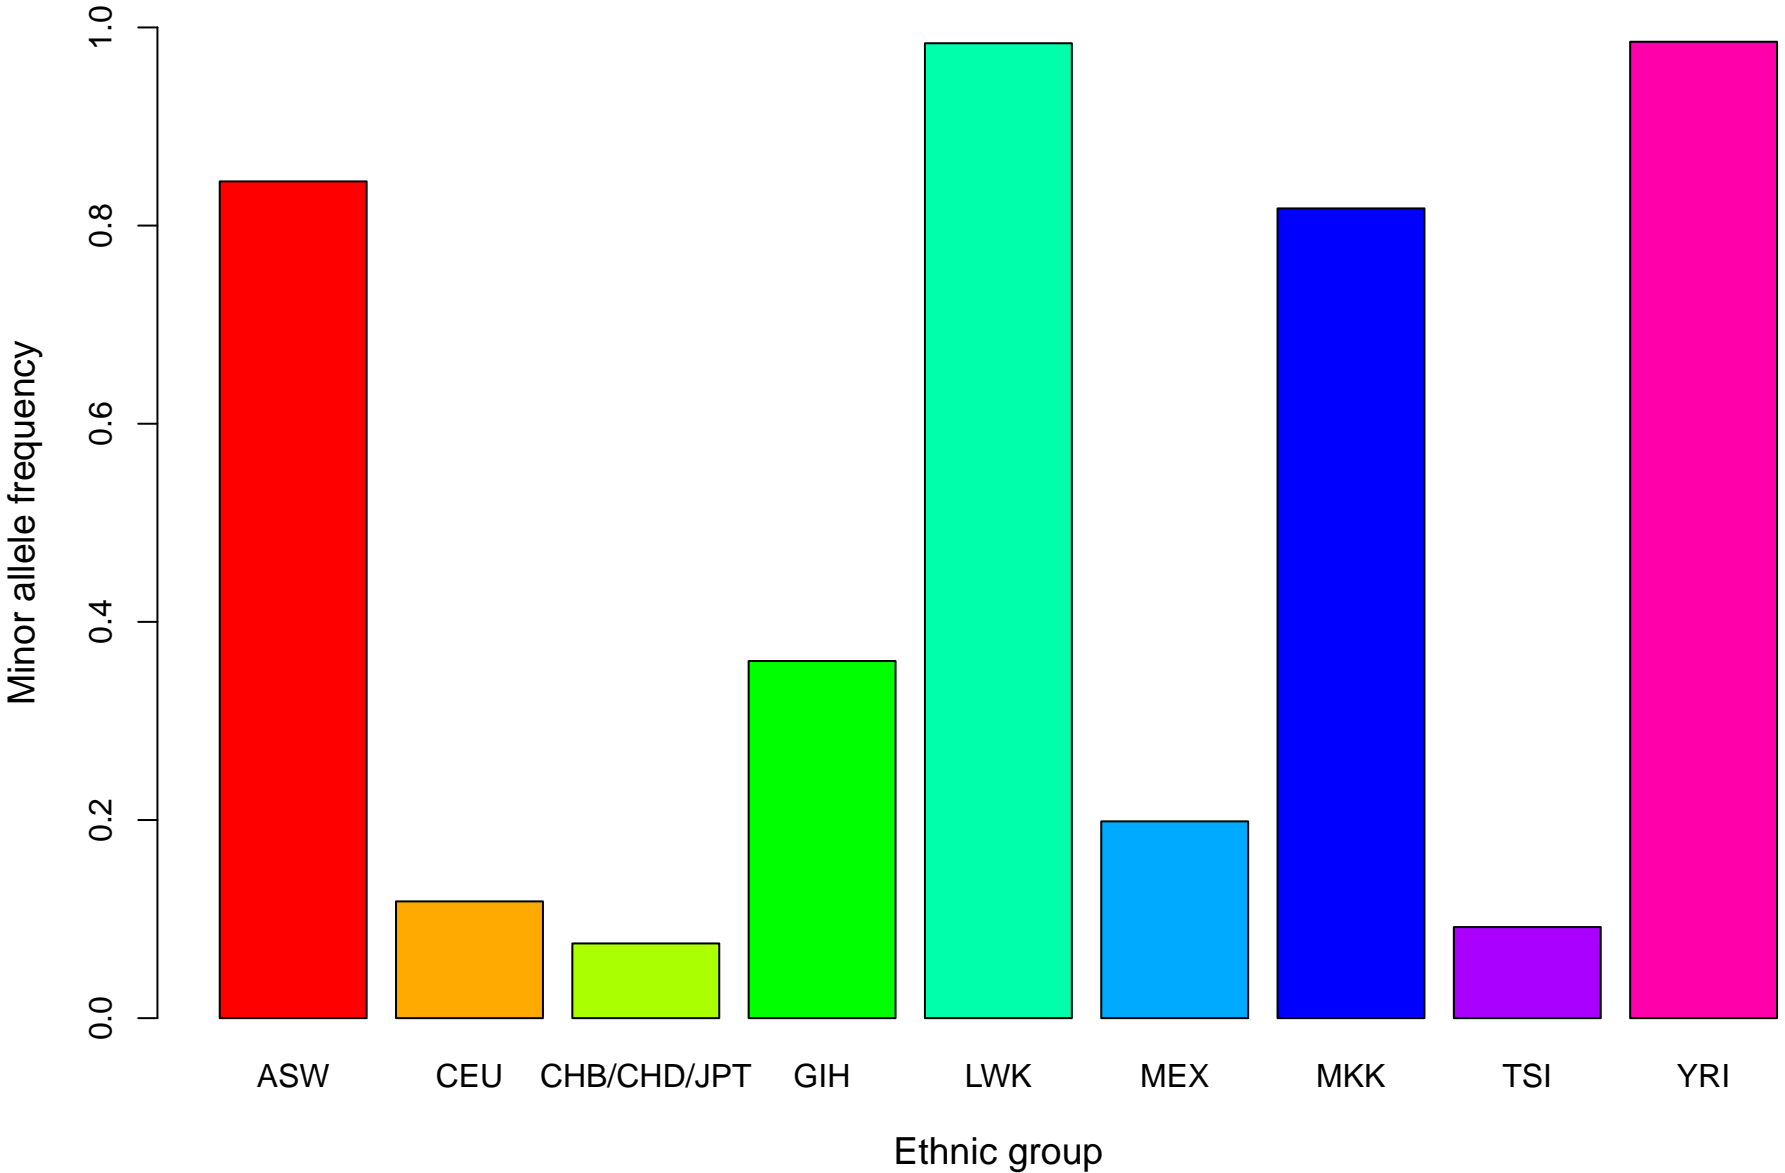

# rs2416504\_C

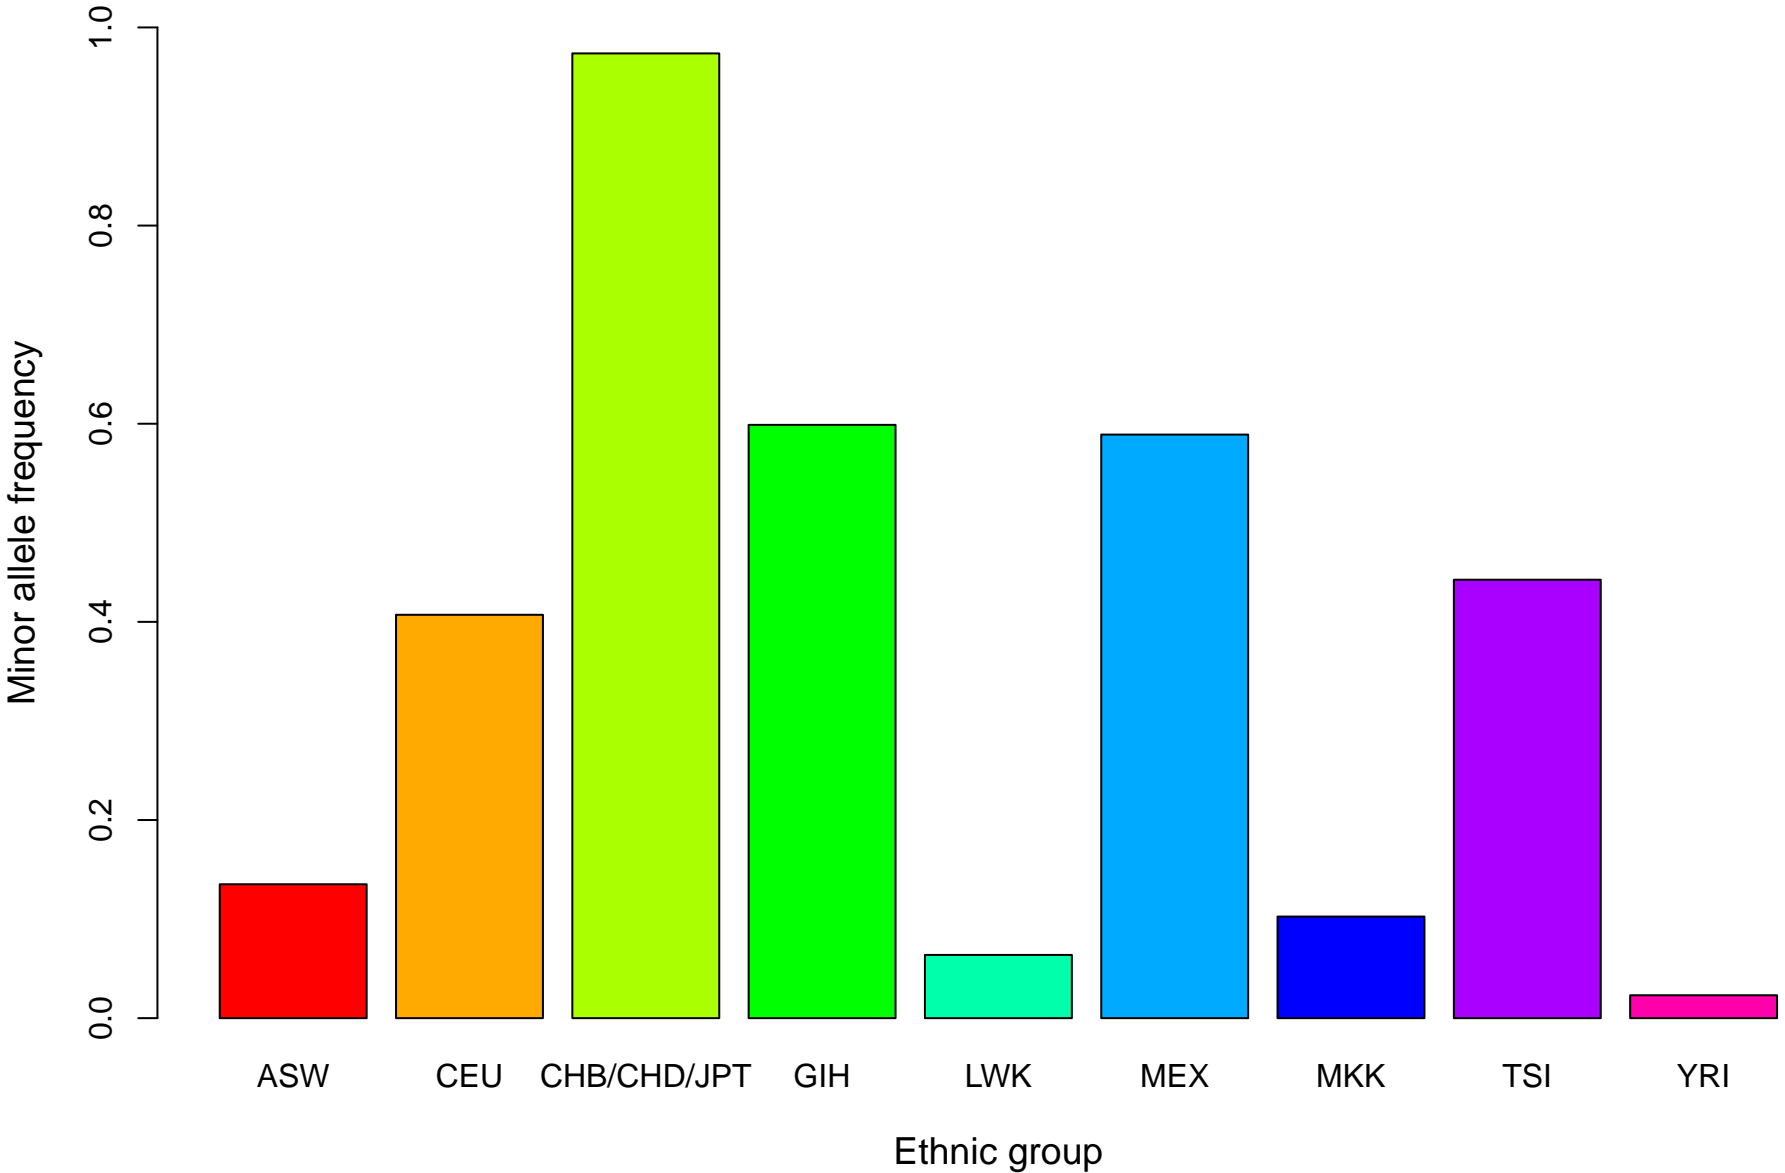

# rs4739794\_G

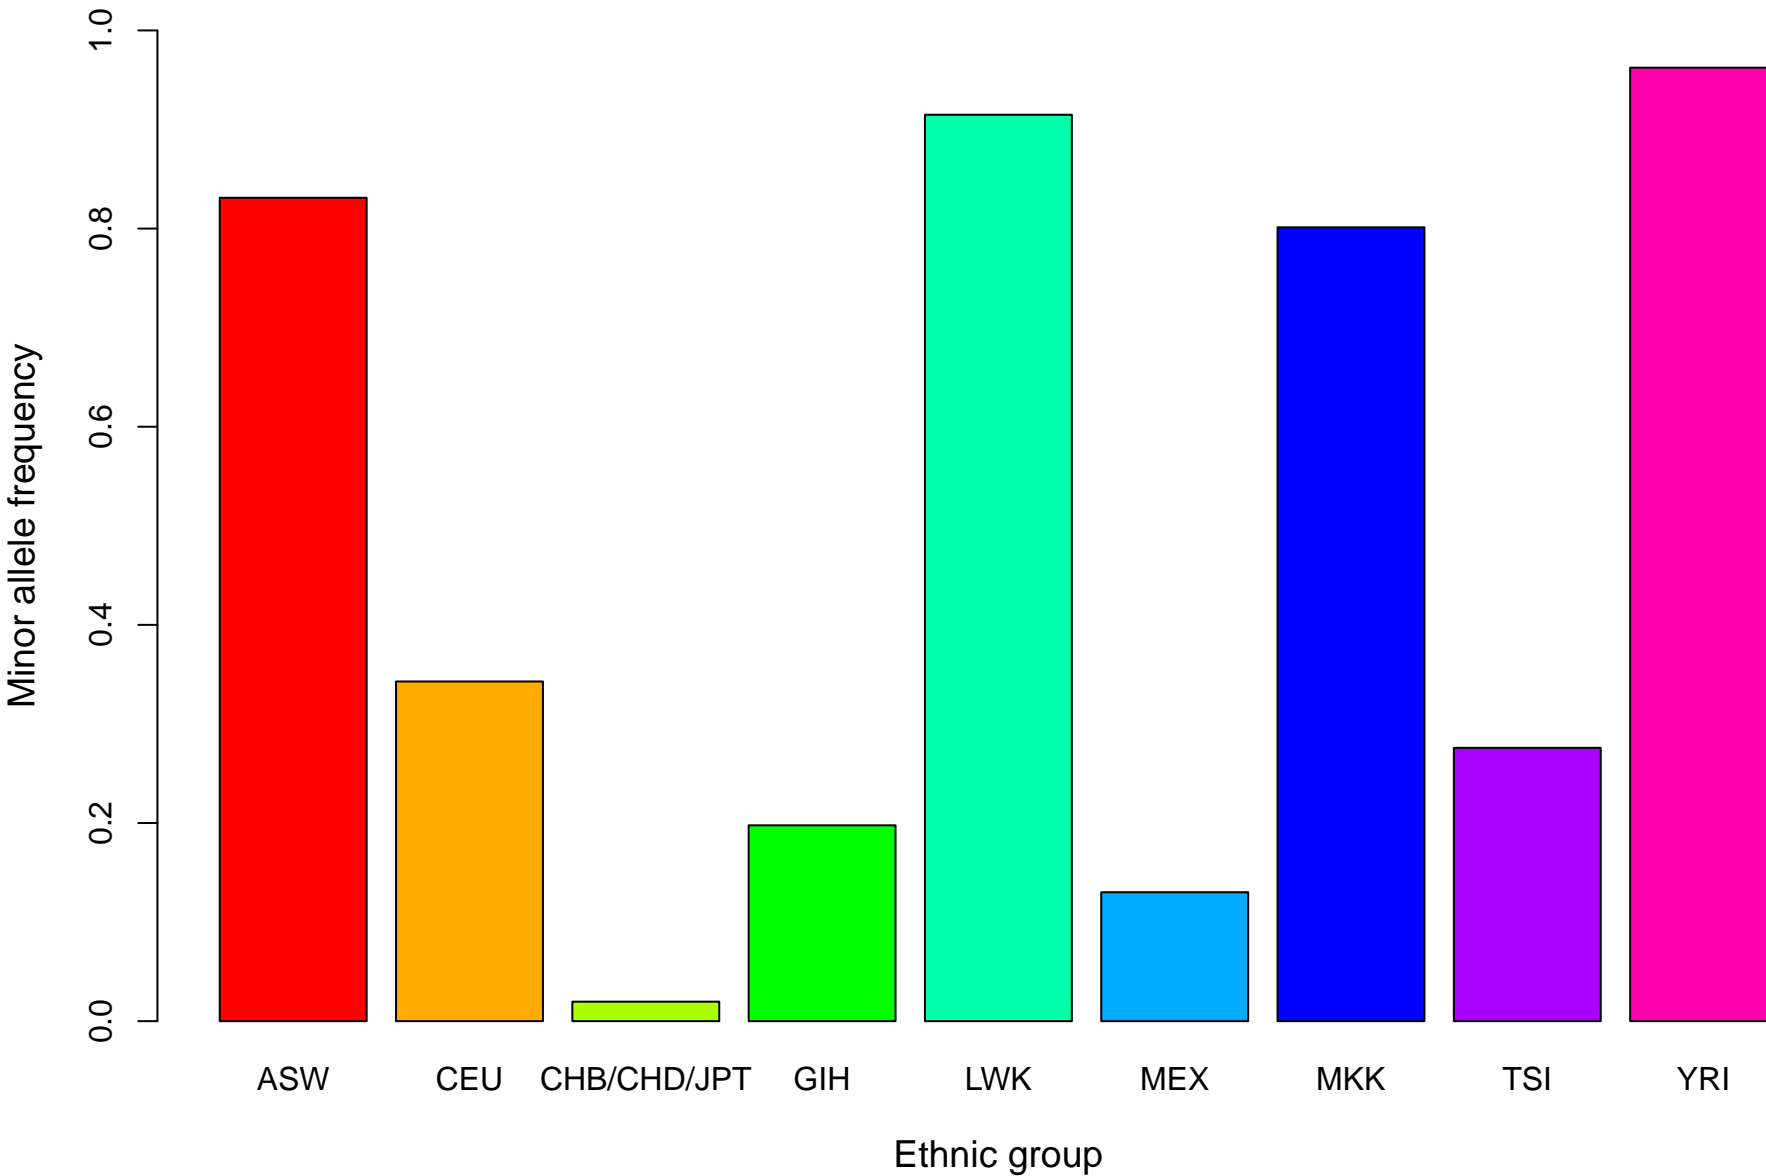

# rs28777\_A

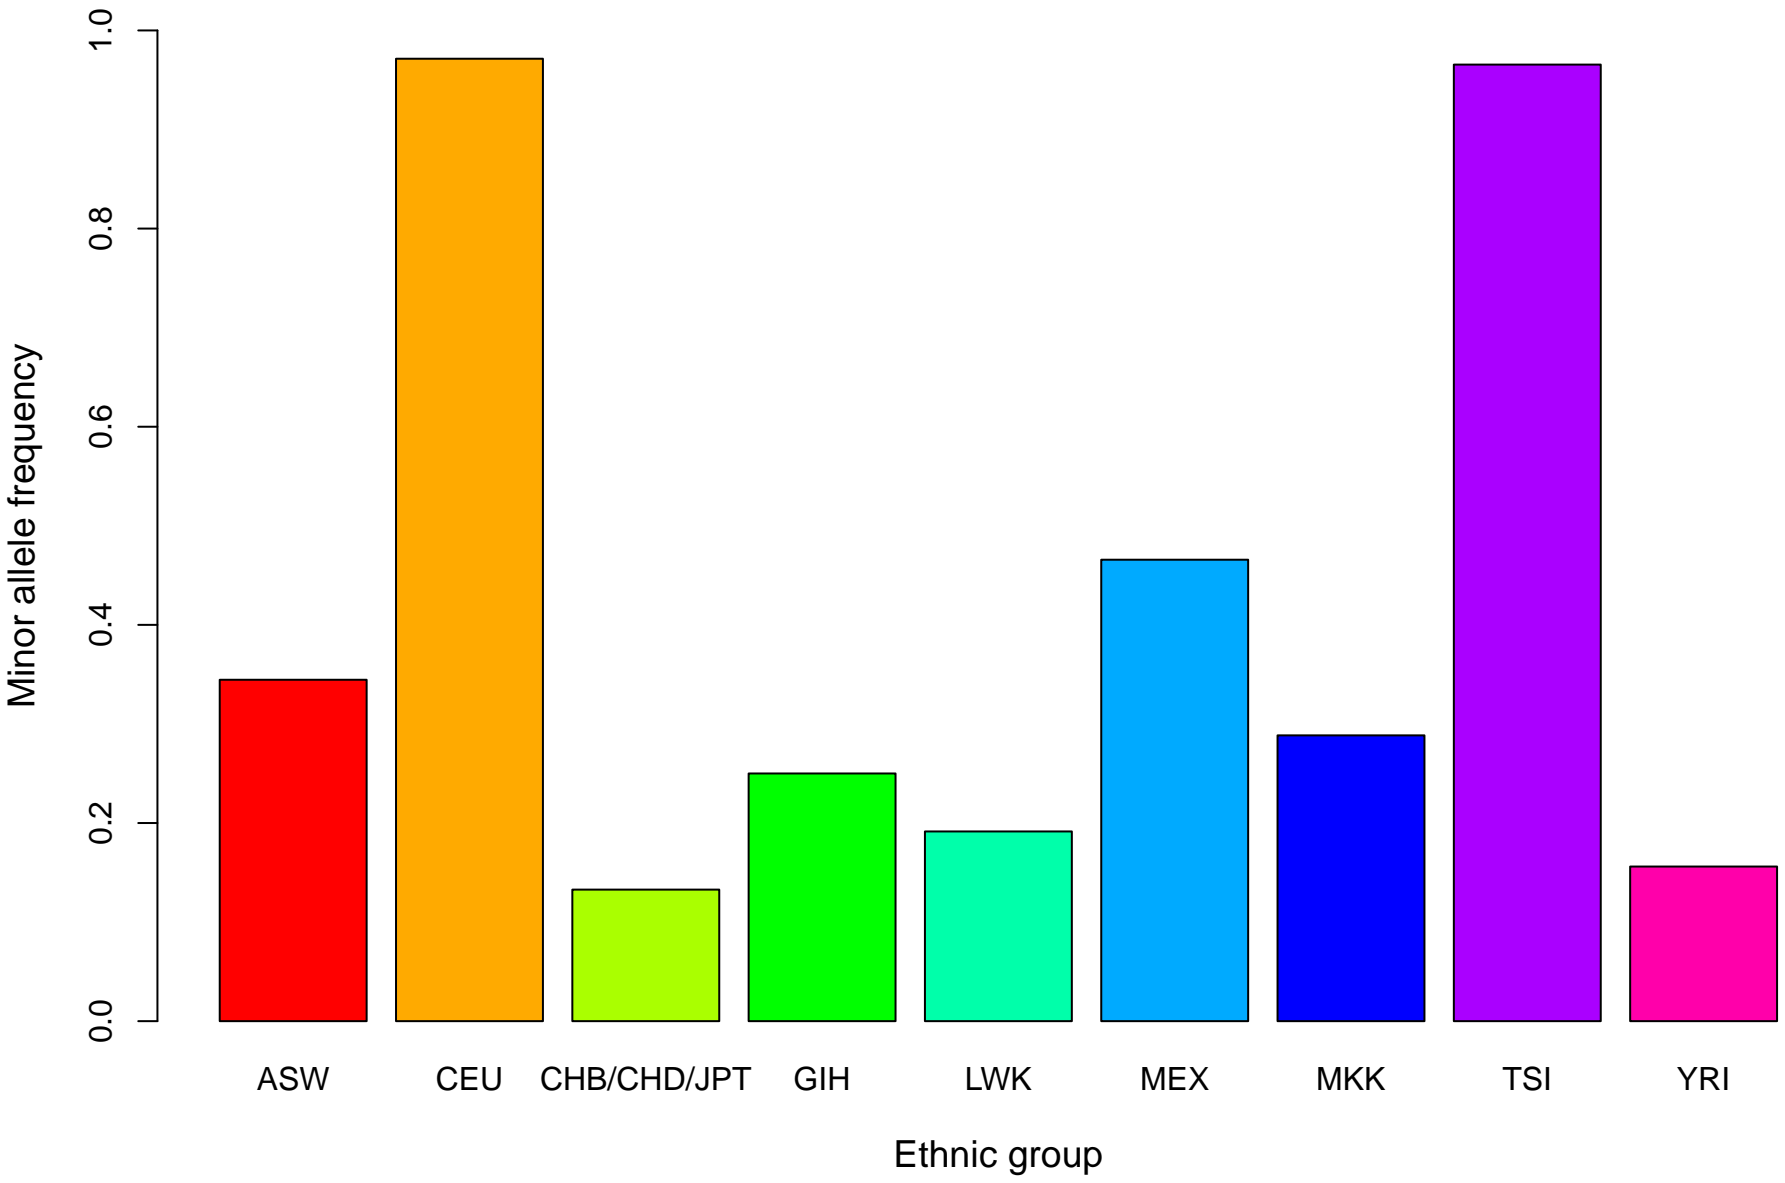

# rs6869617\_G

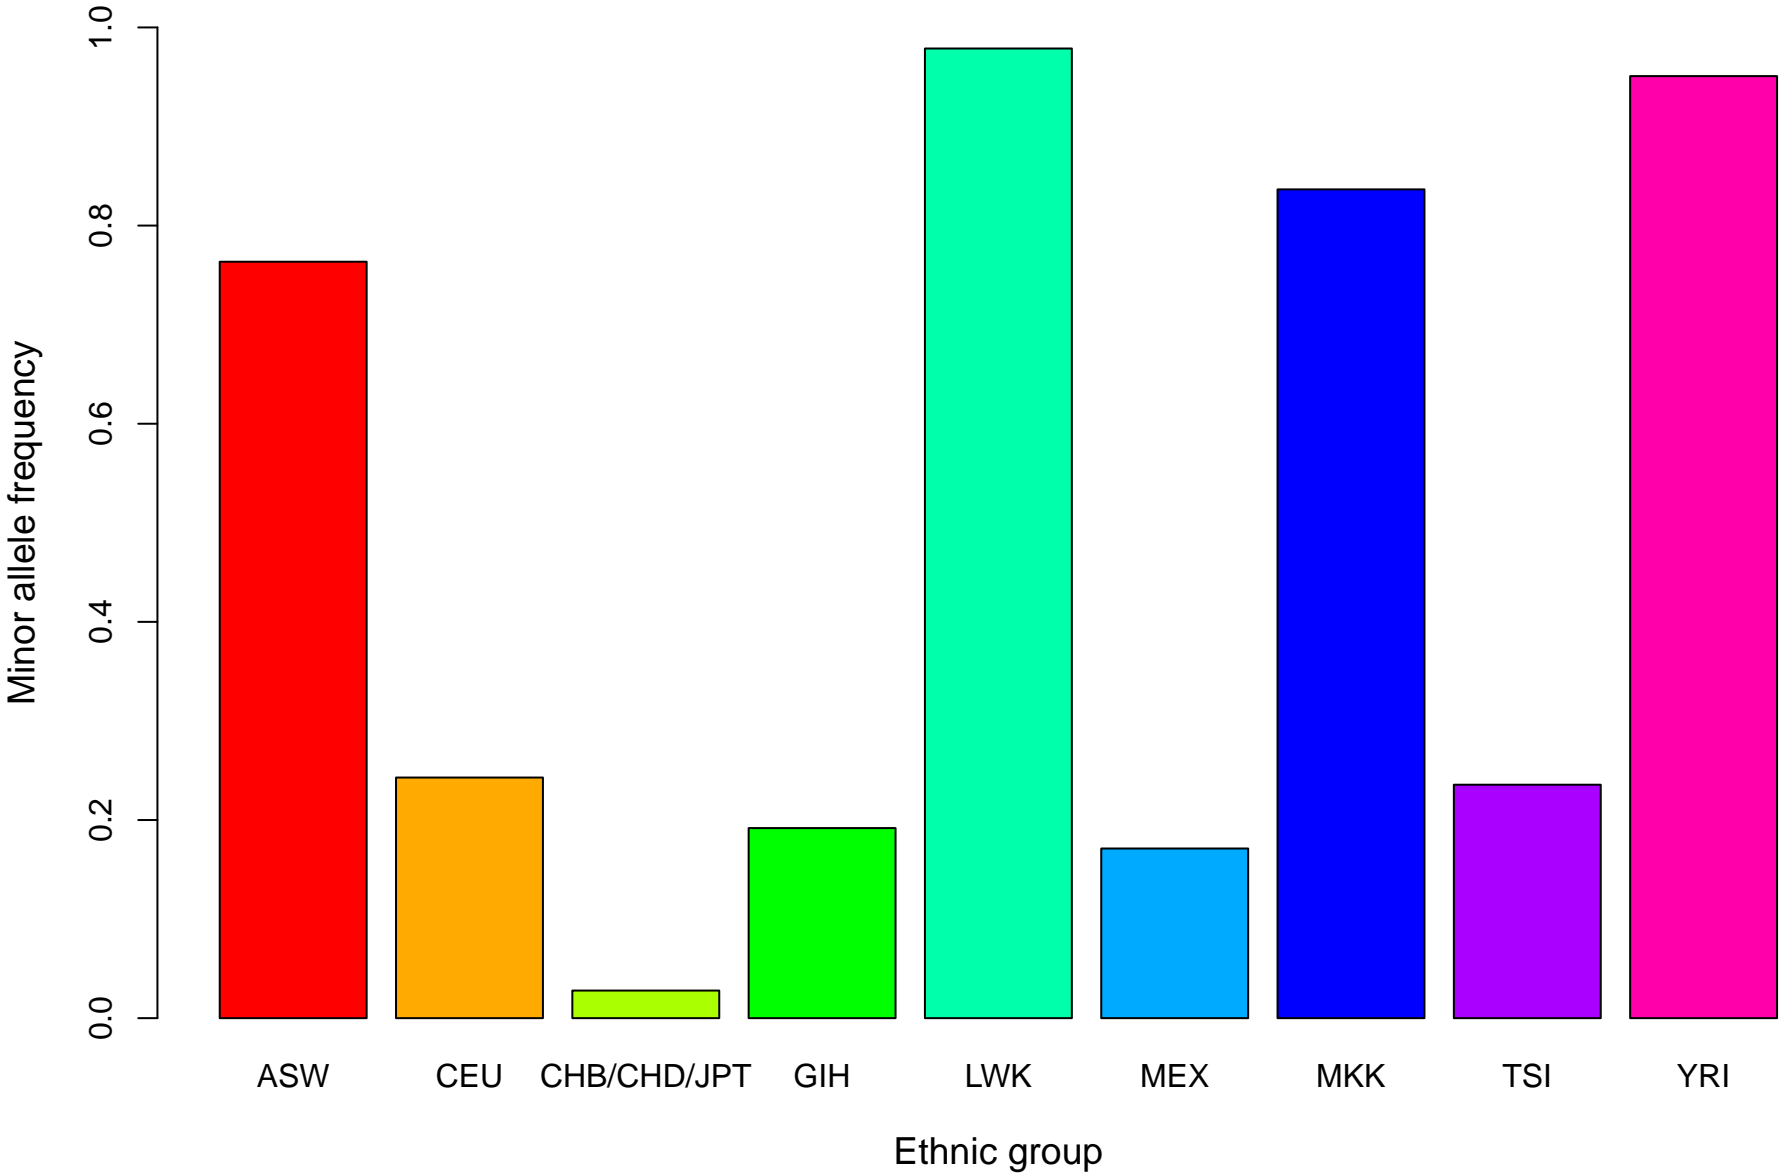

# rs3784230\_A

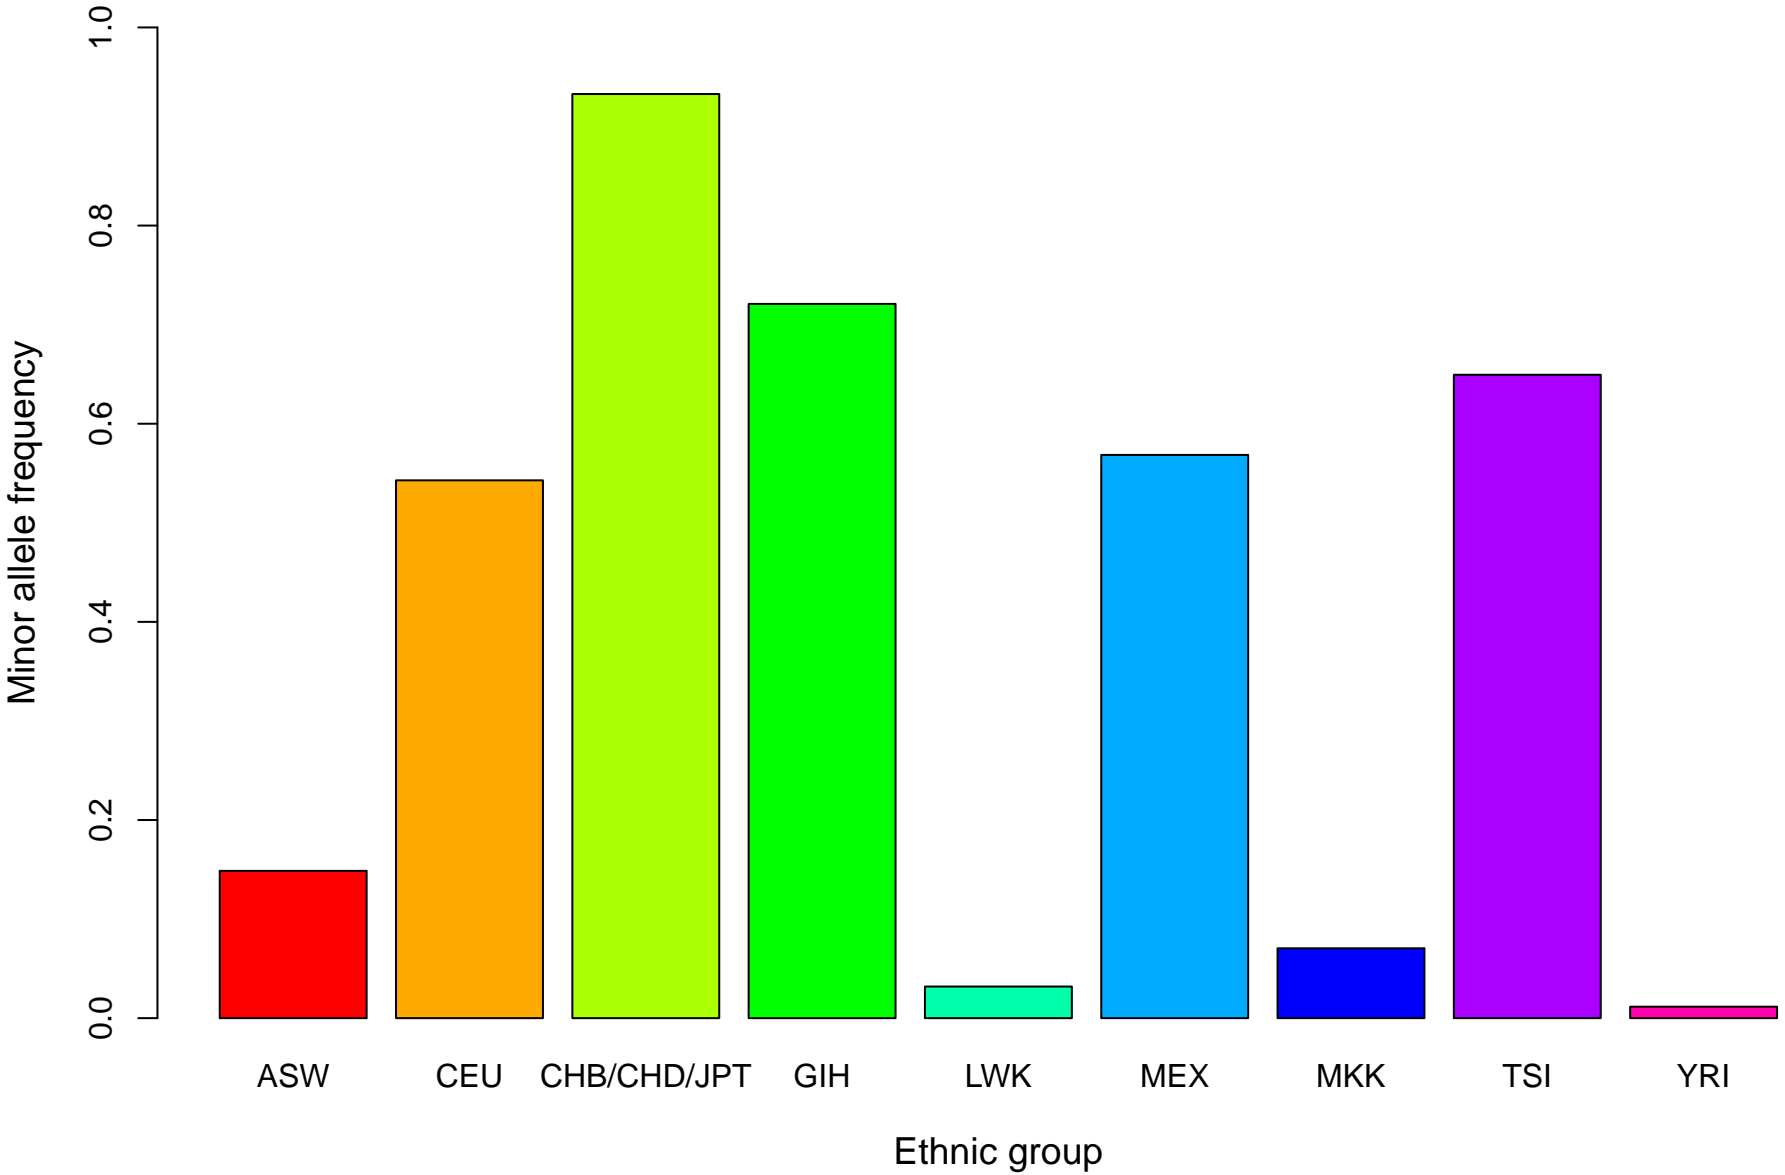

# rs10110123\_C

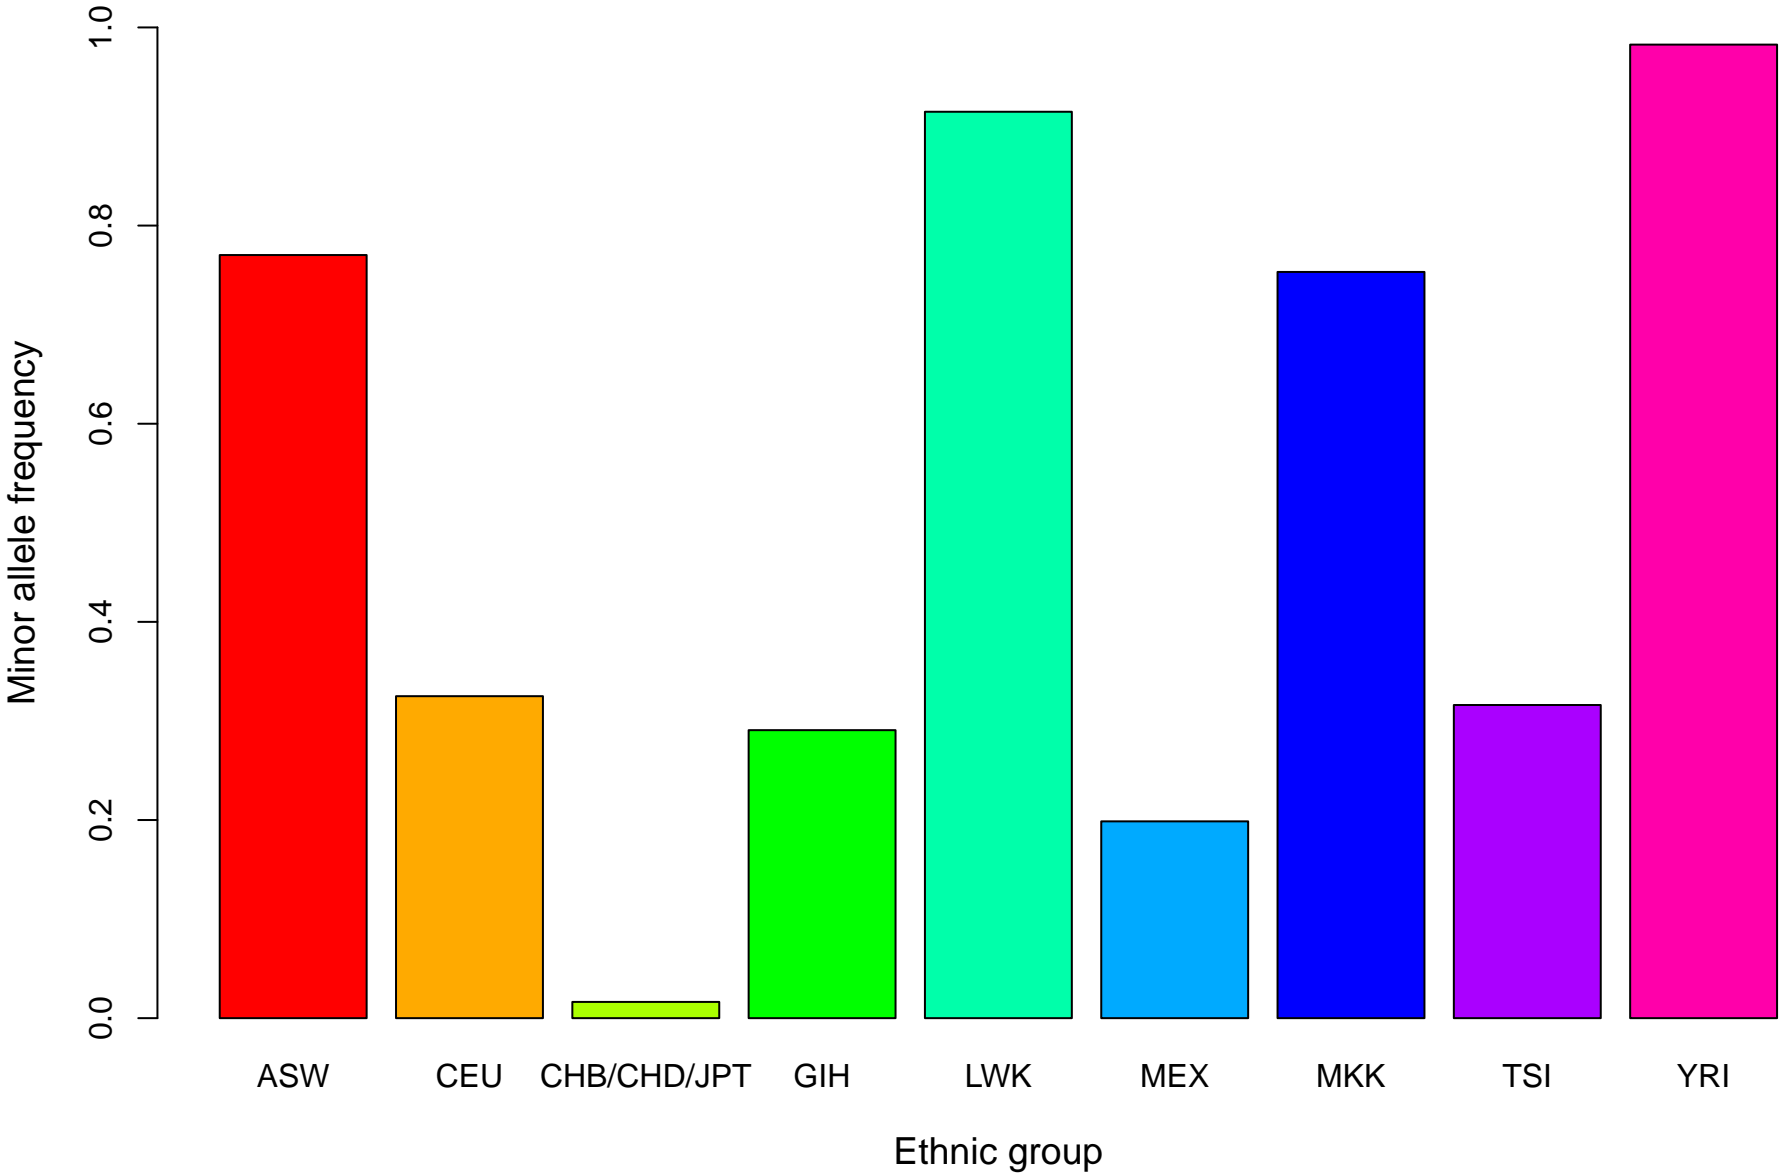

# rs2040190\_C

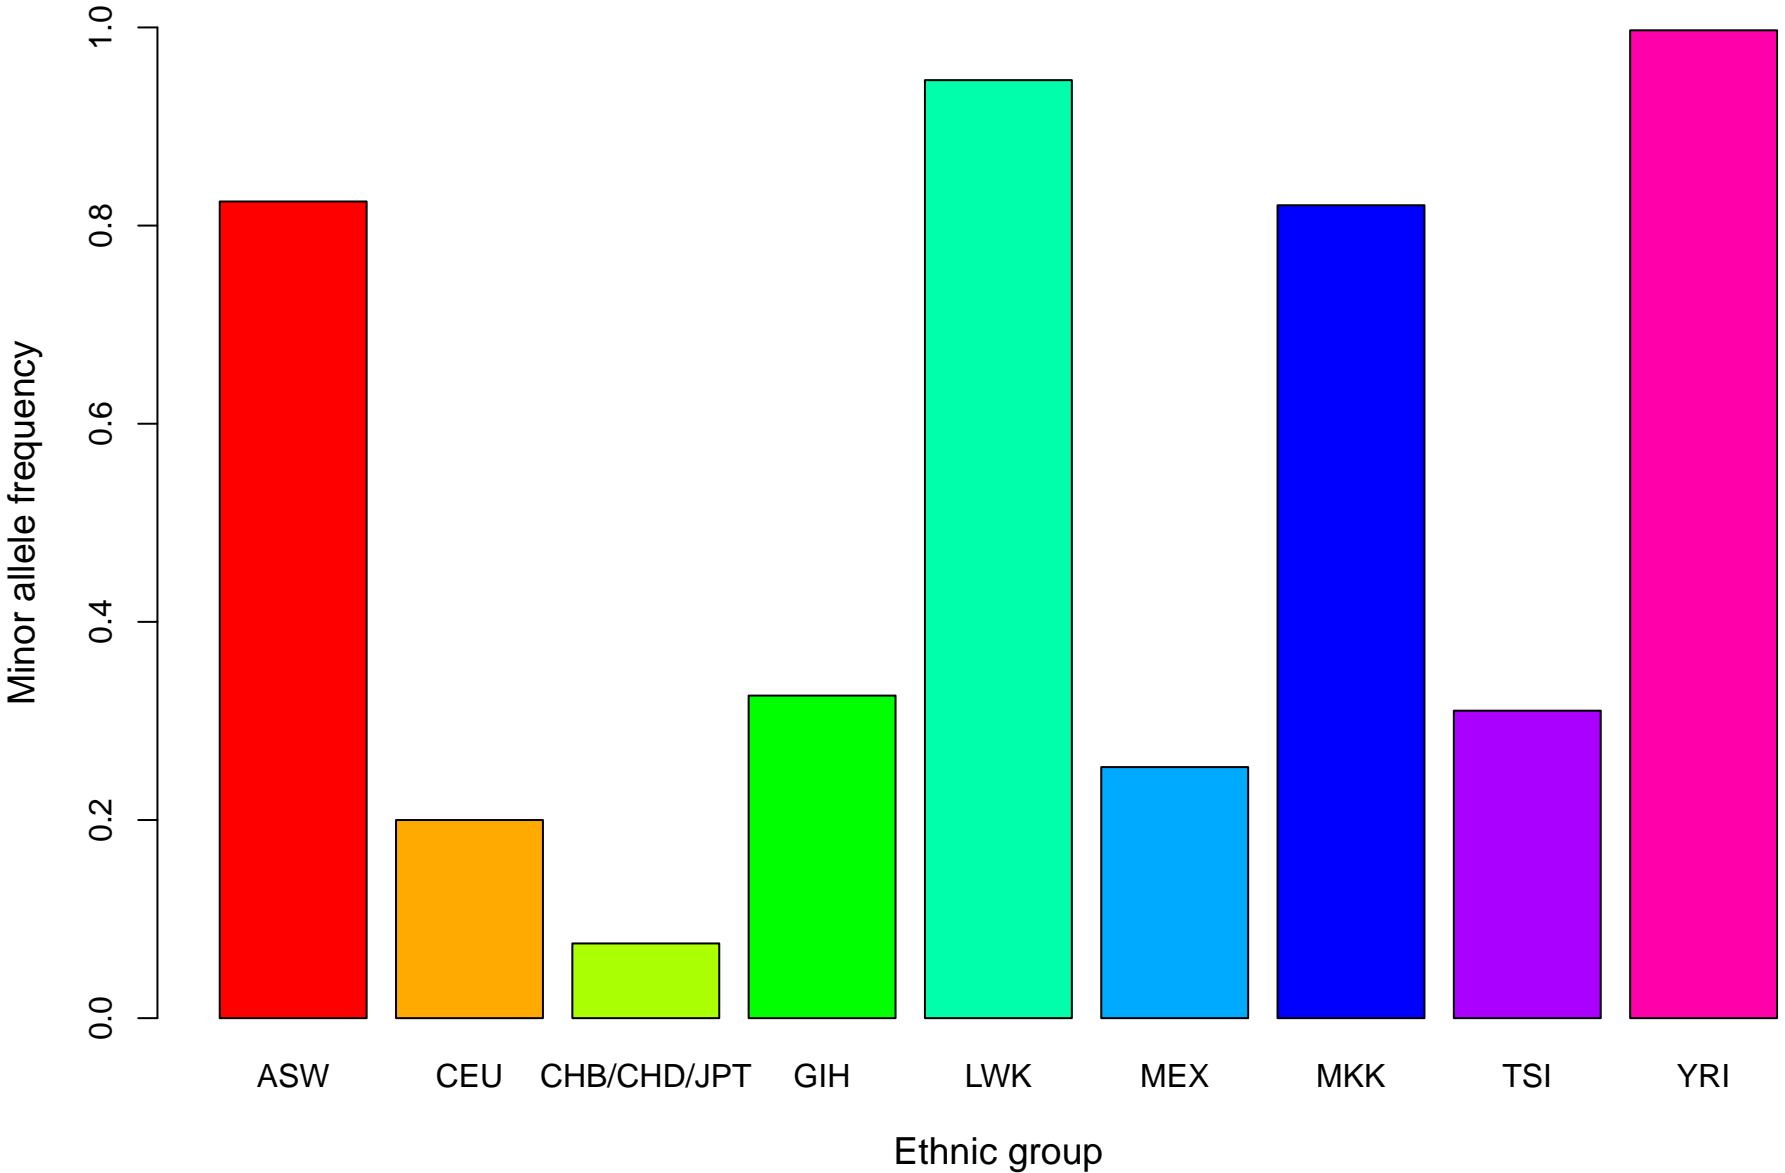



# rs933717\_T

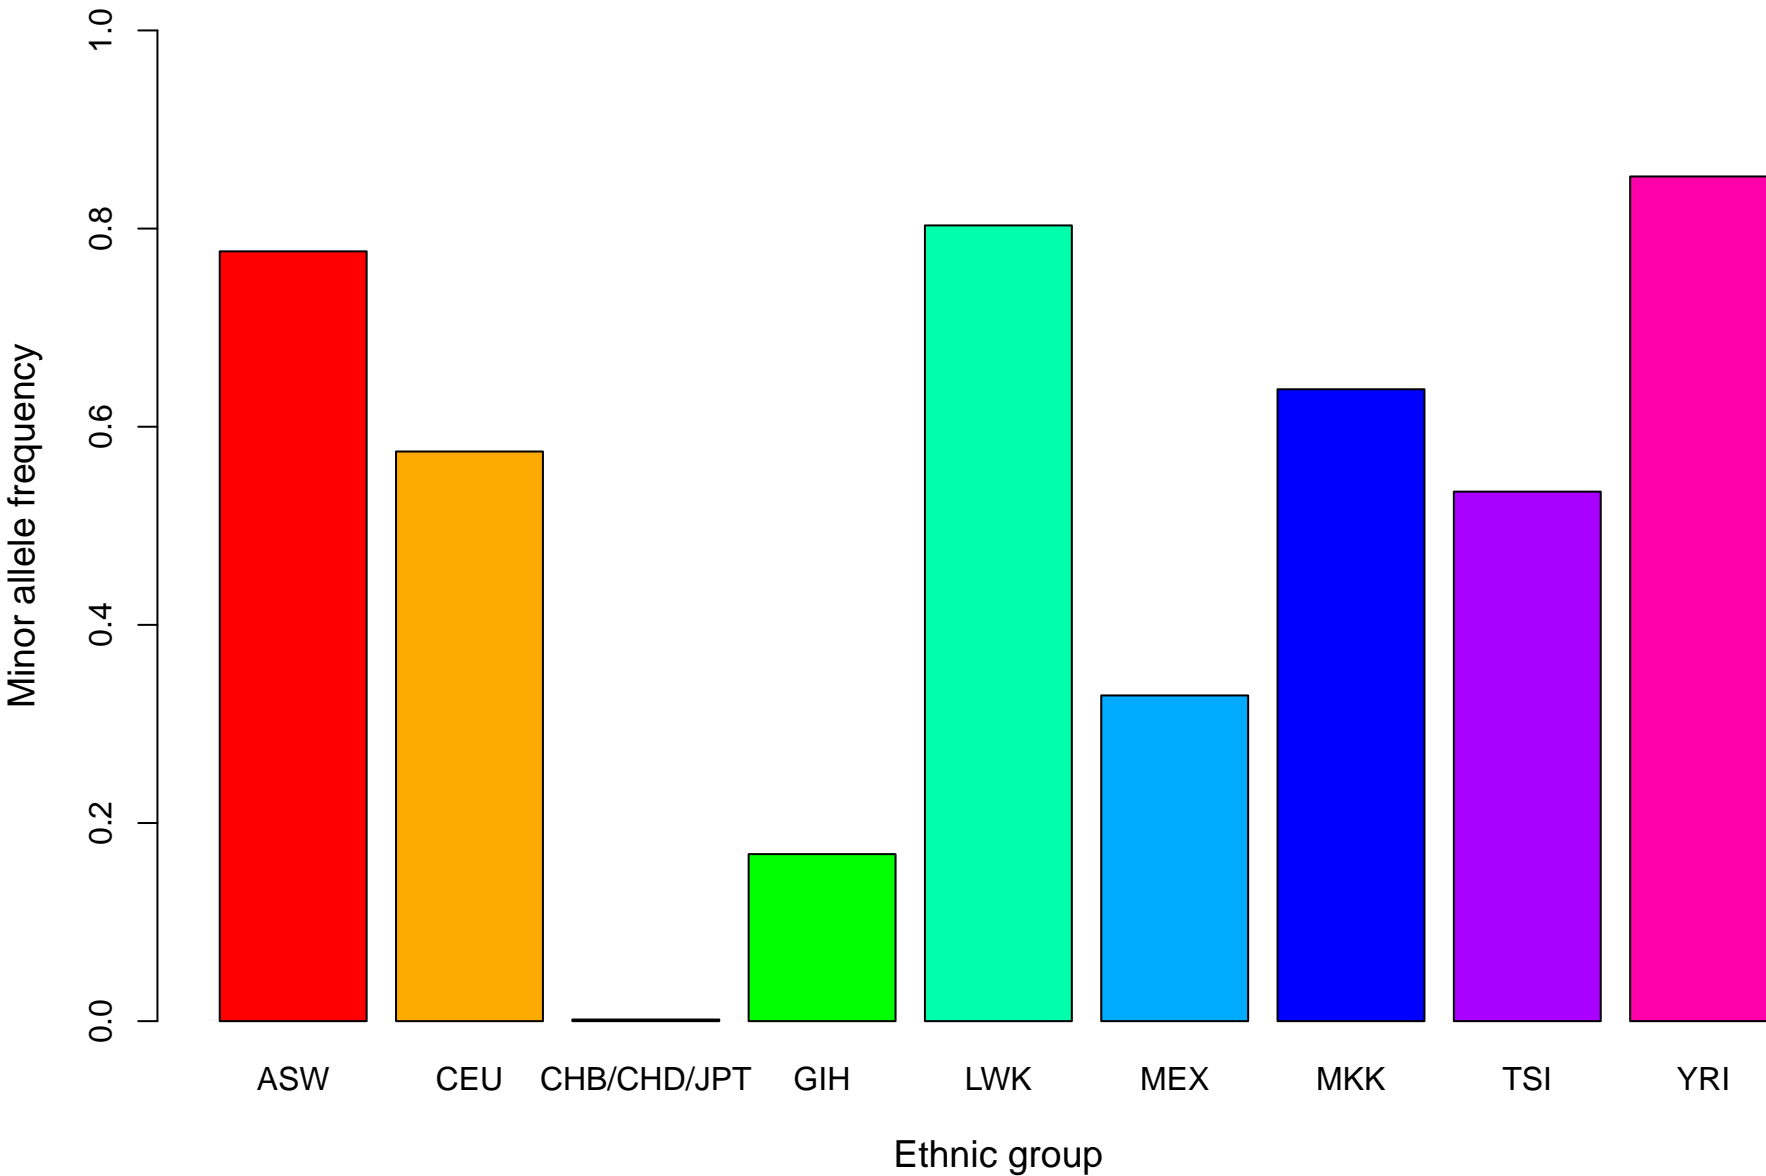

# rs7689609\_T

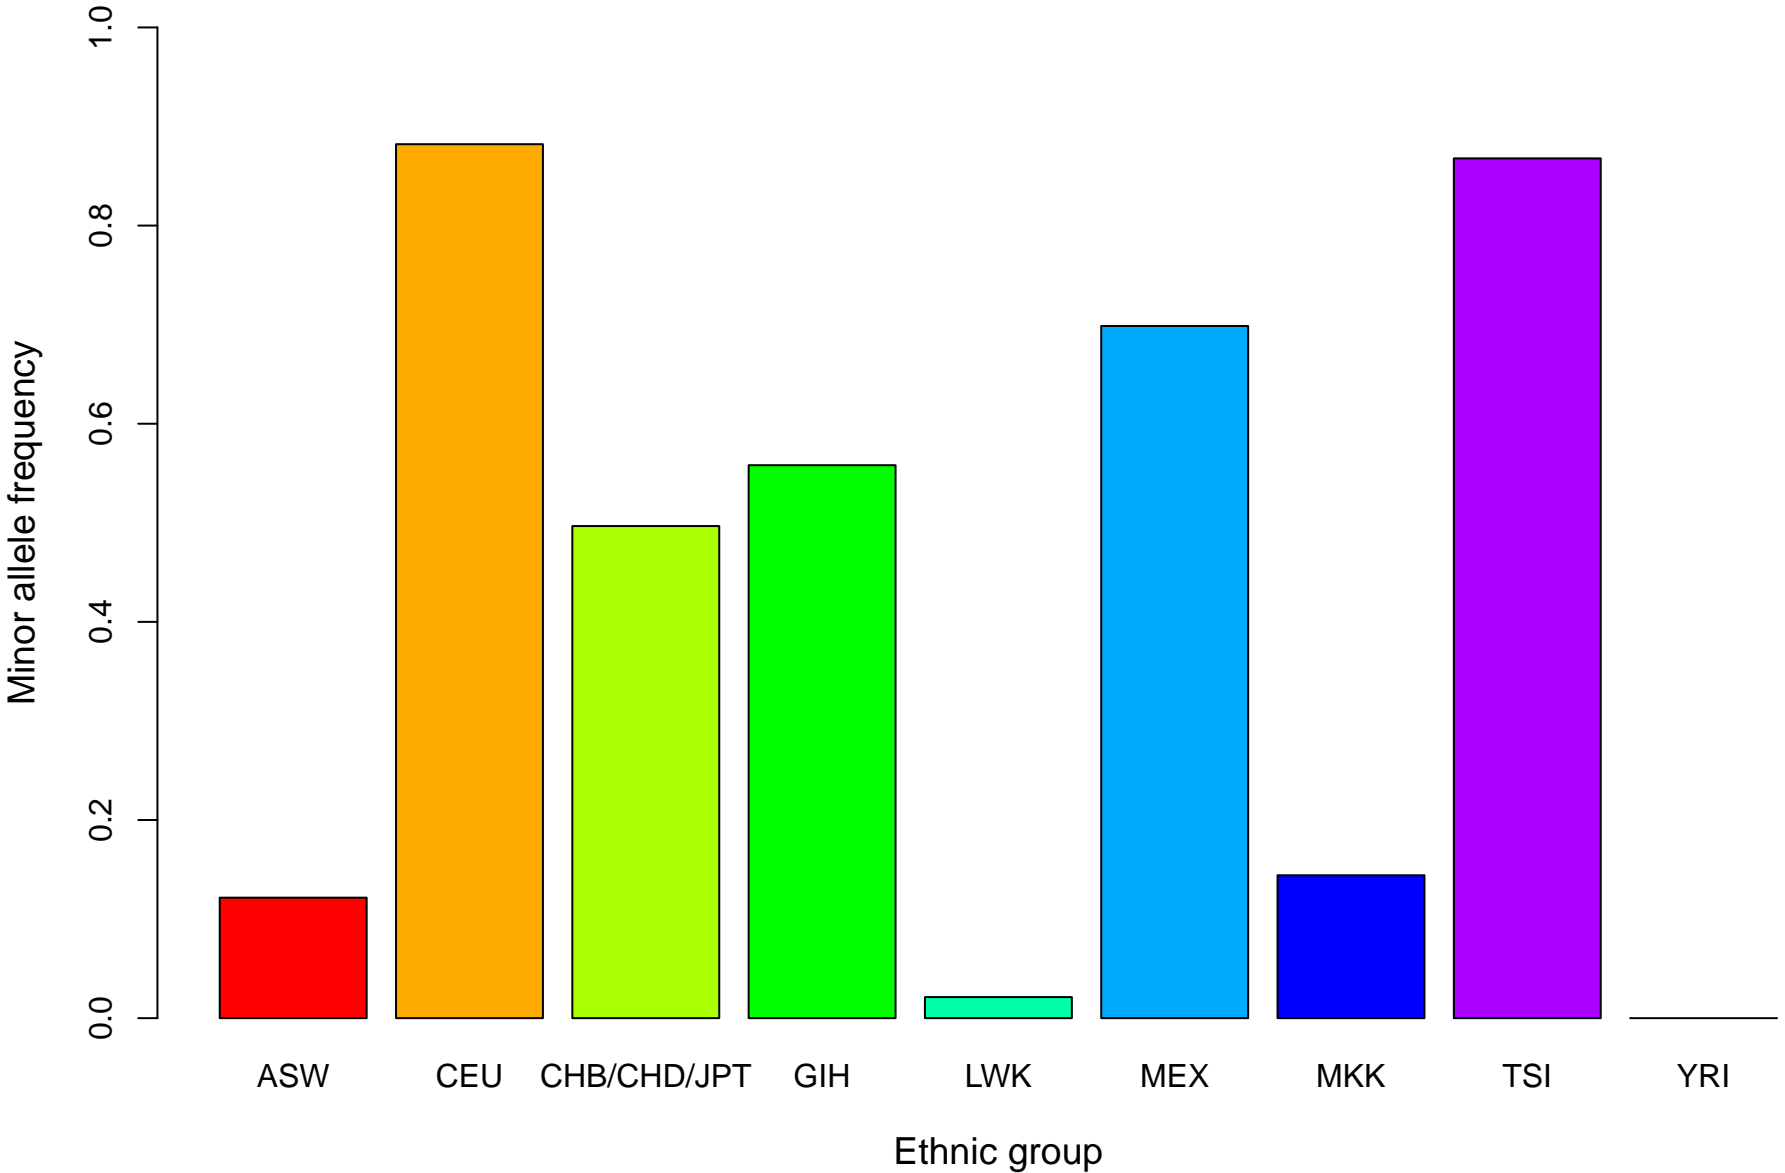

# rs4500045\_G

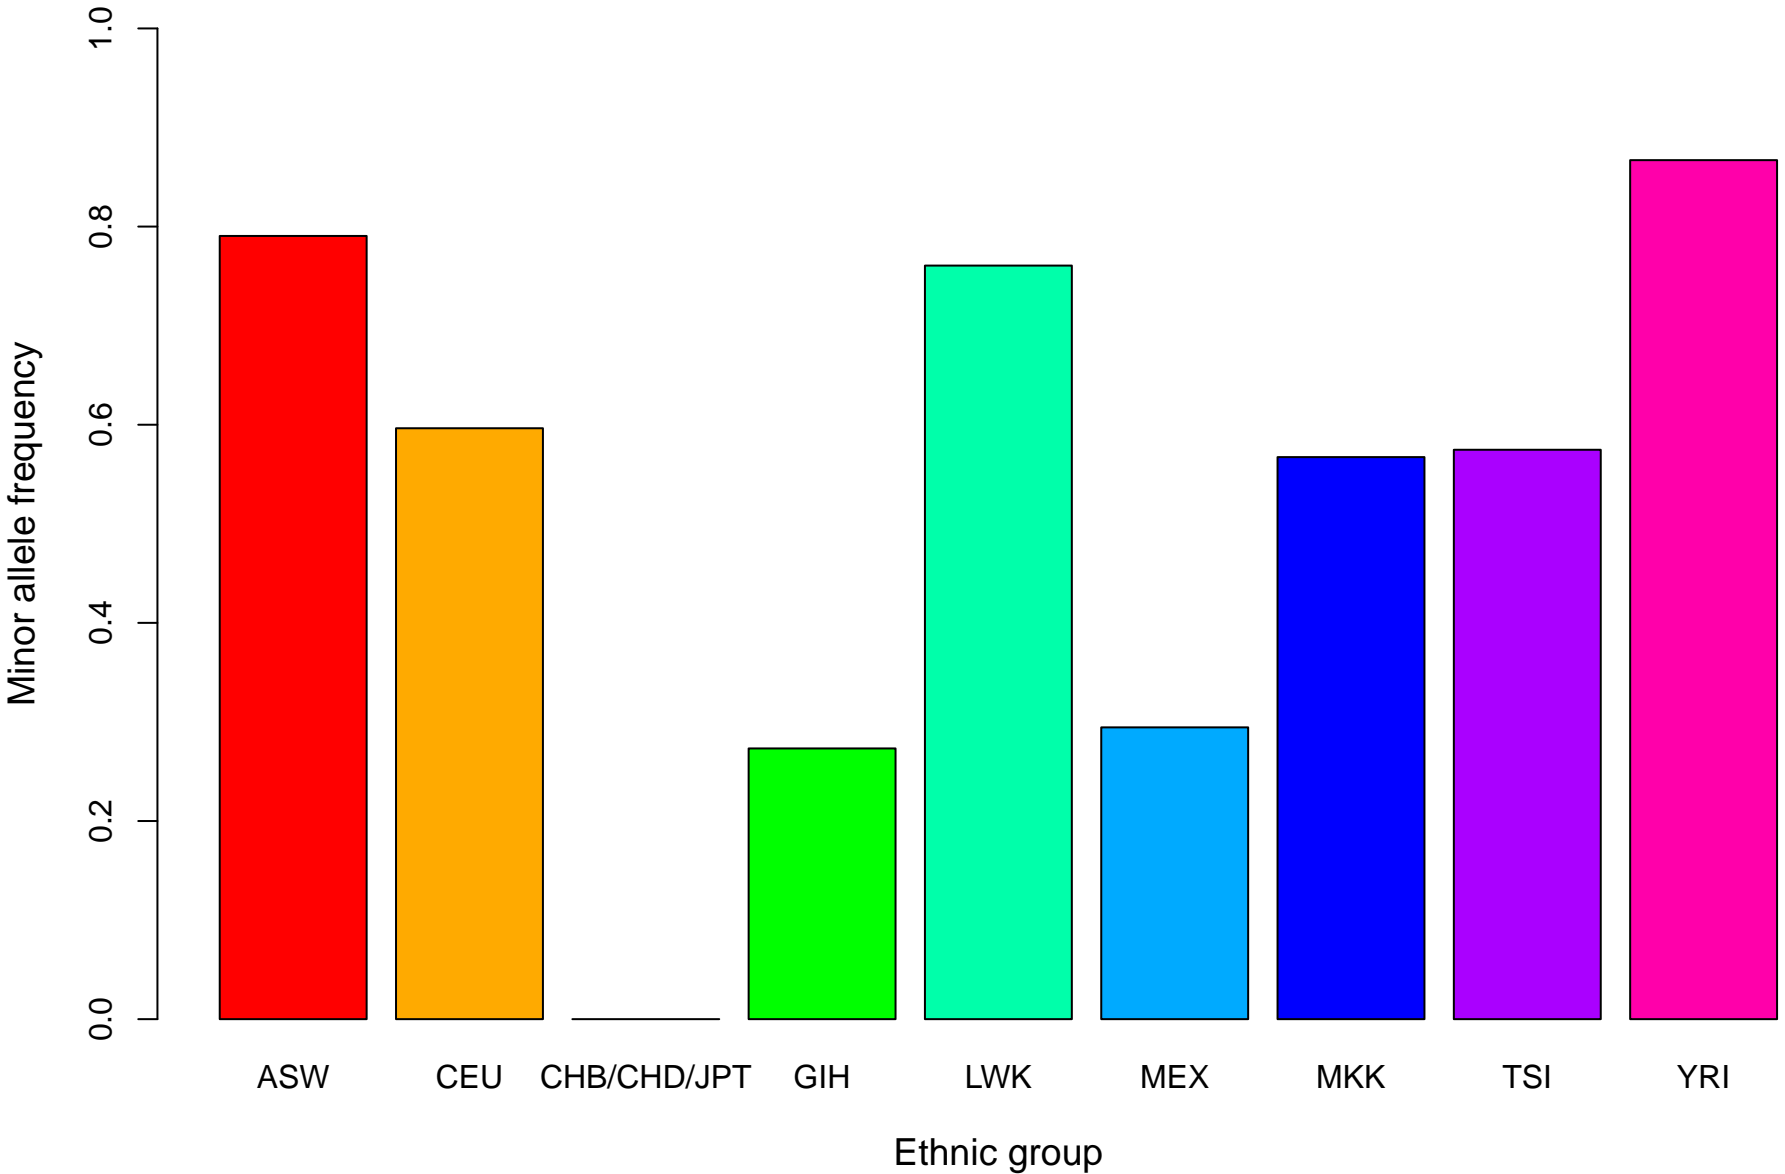

# rs6993286\_T

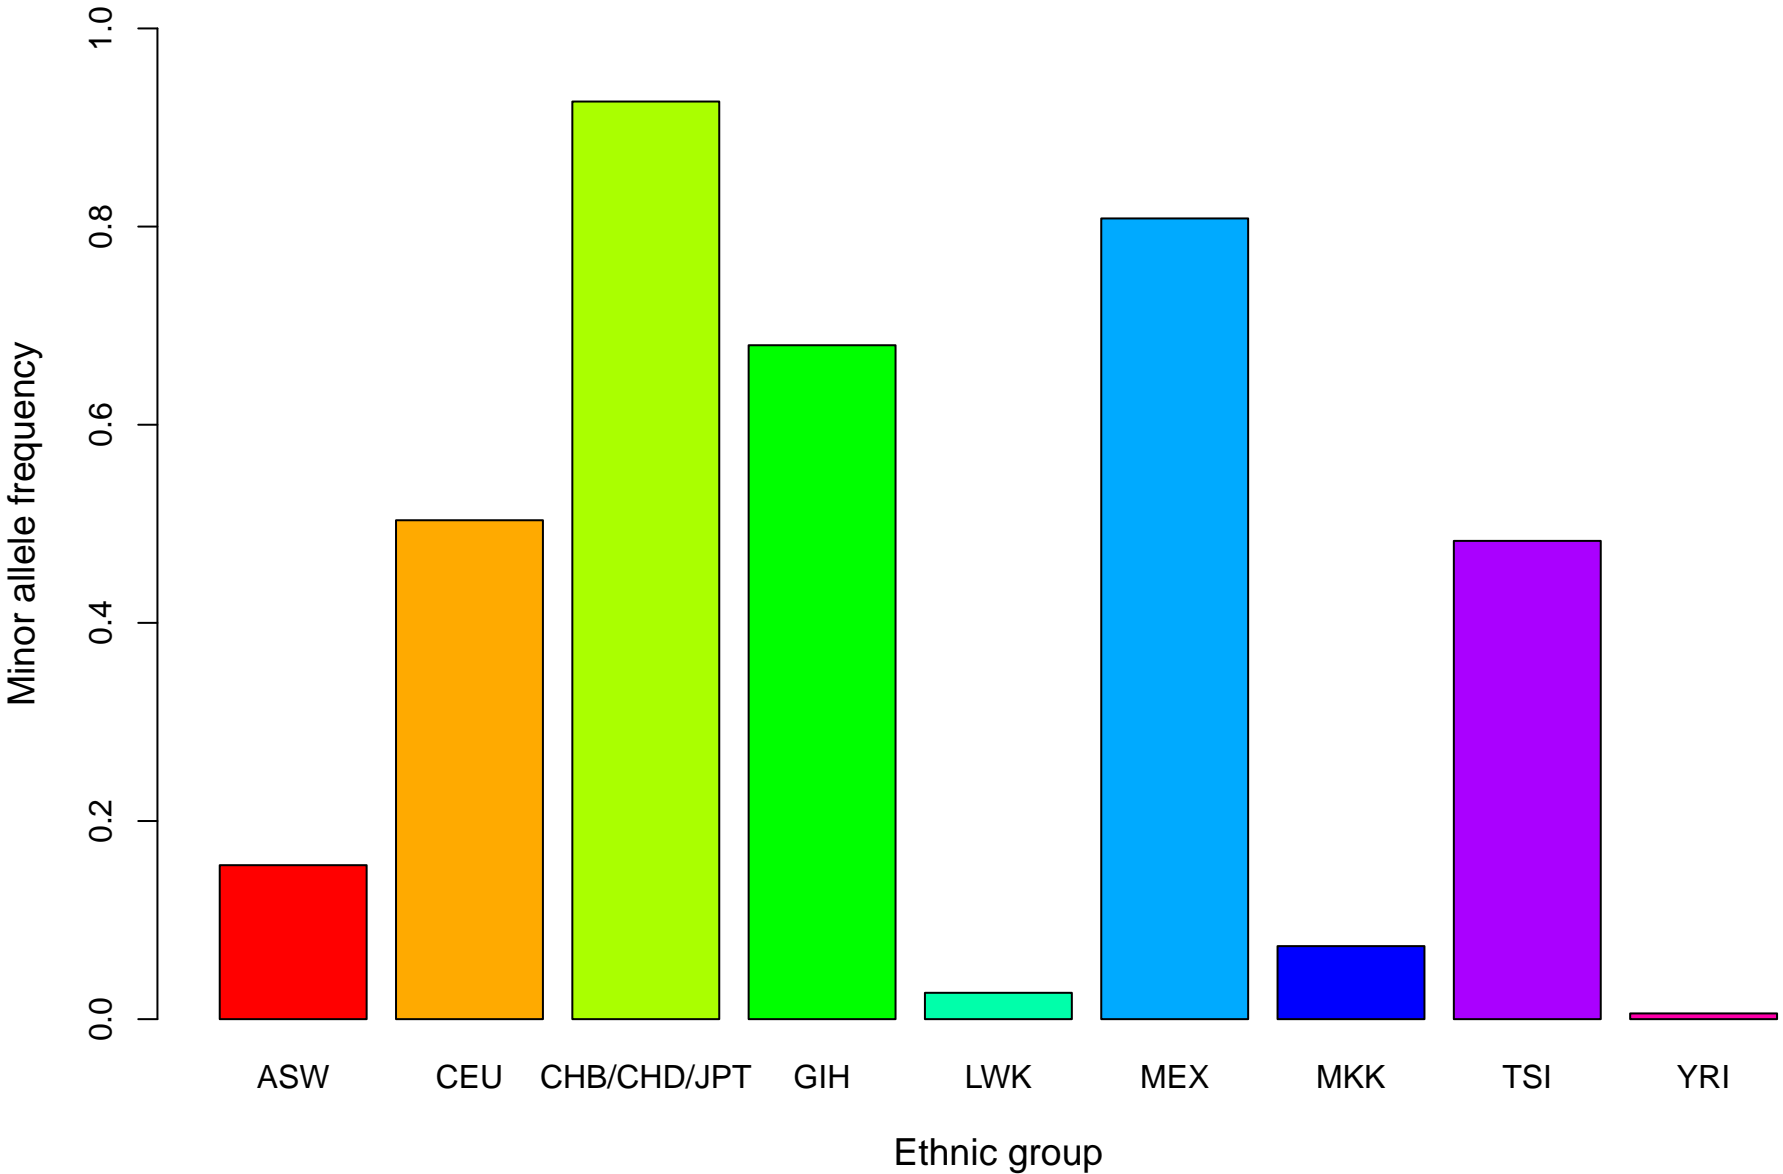

# rs8033972\_G

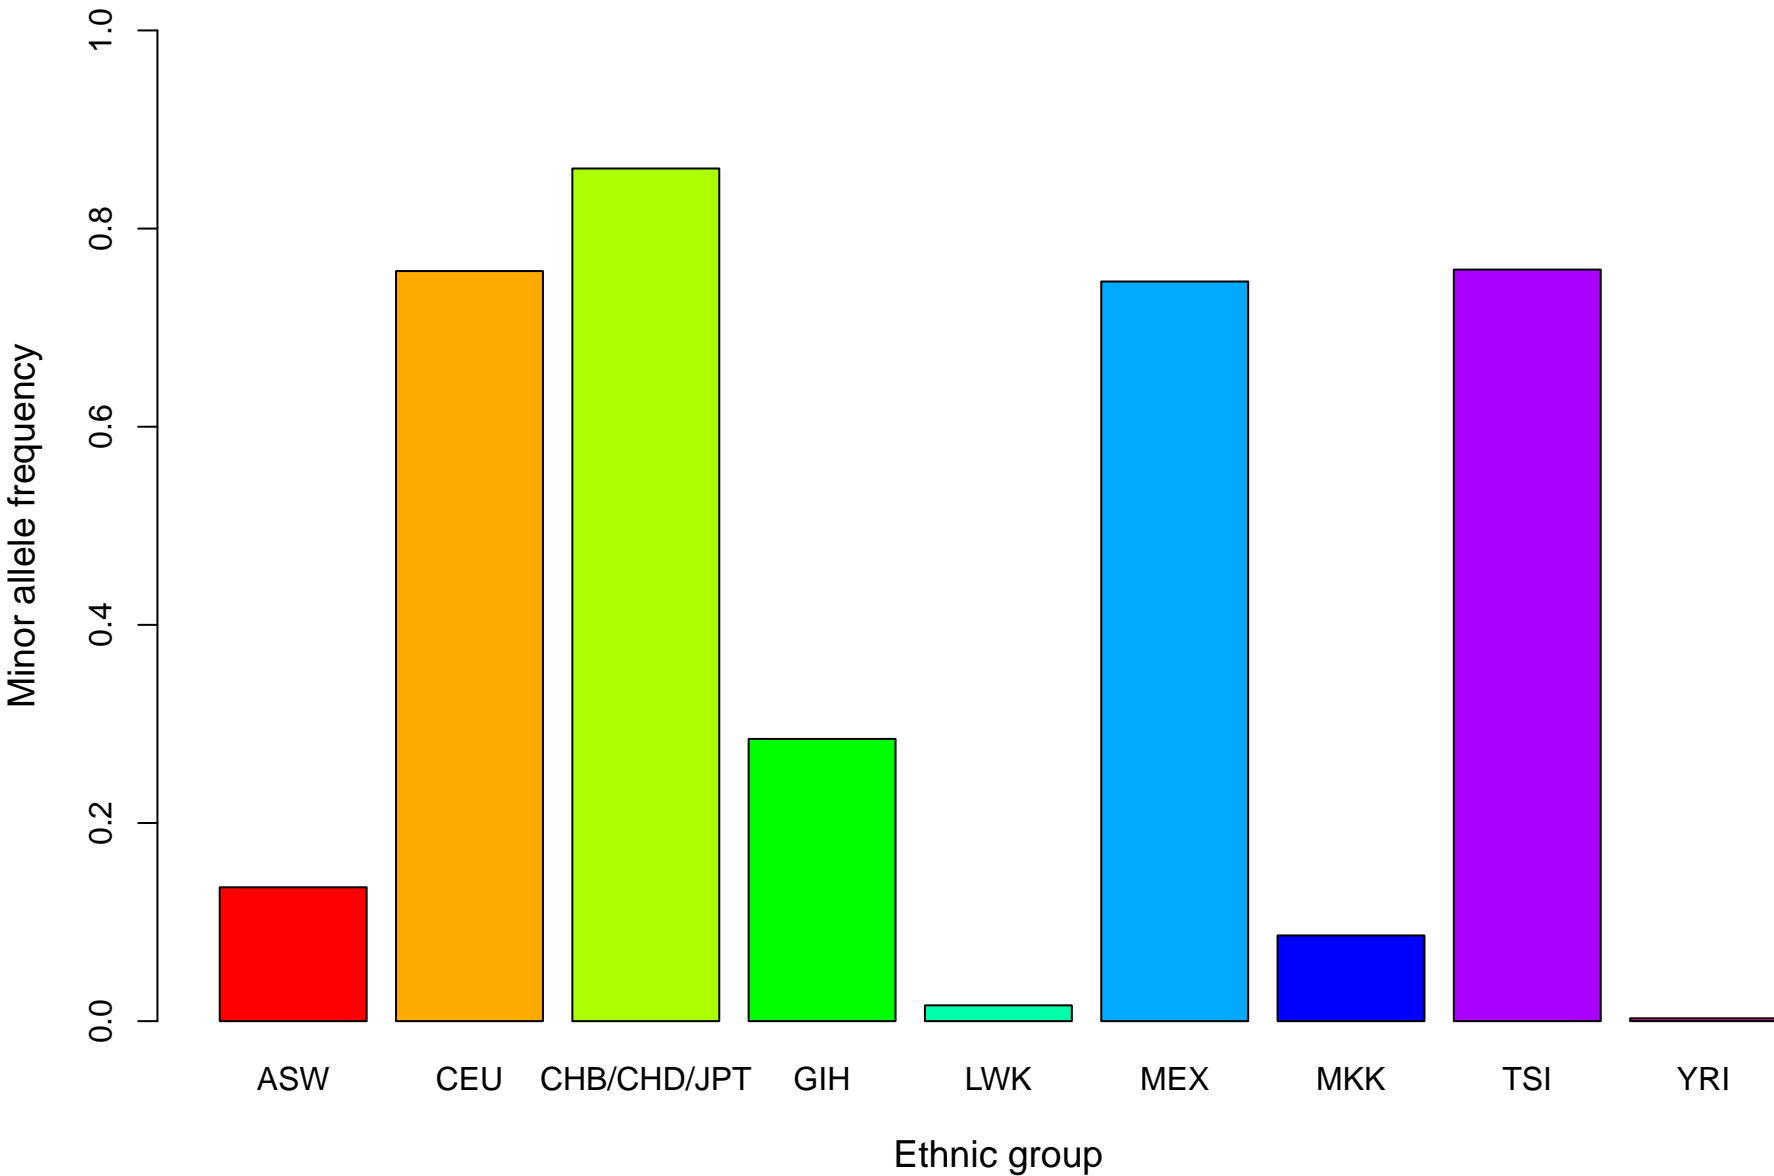

# rs7460299\_C

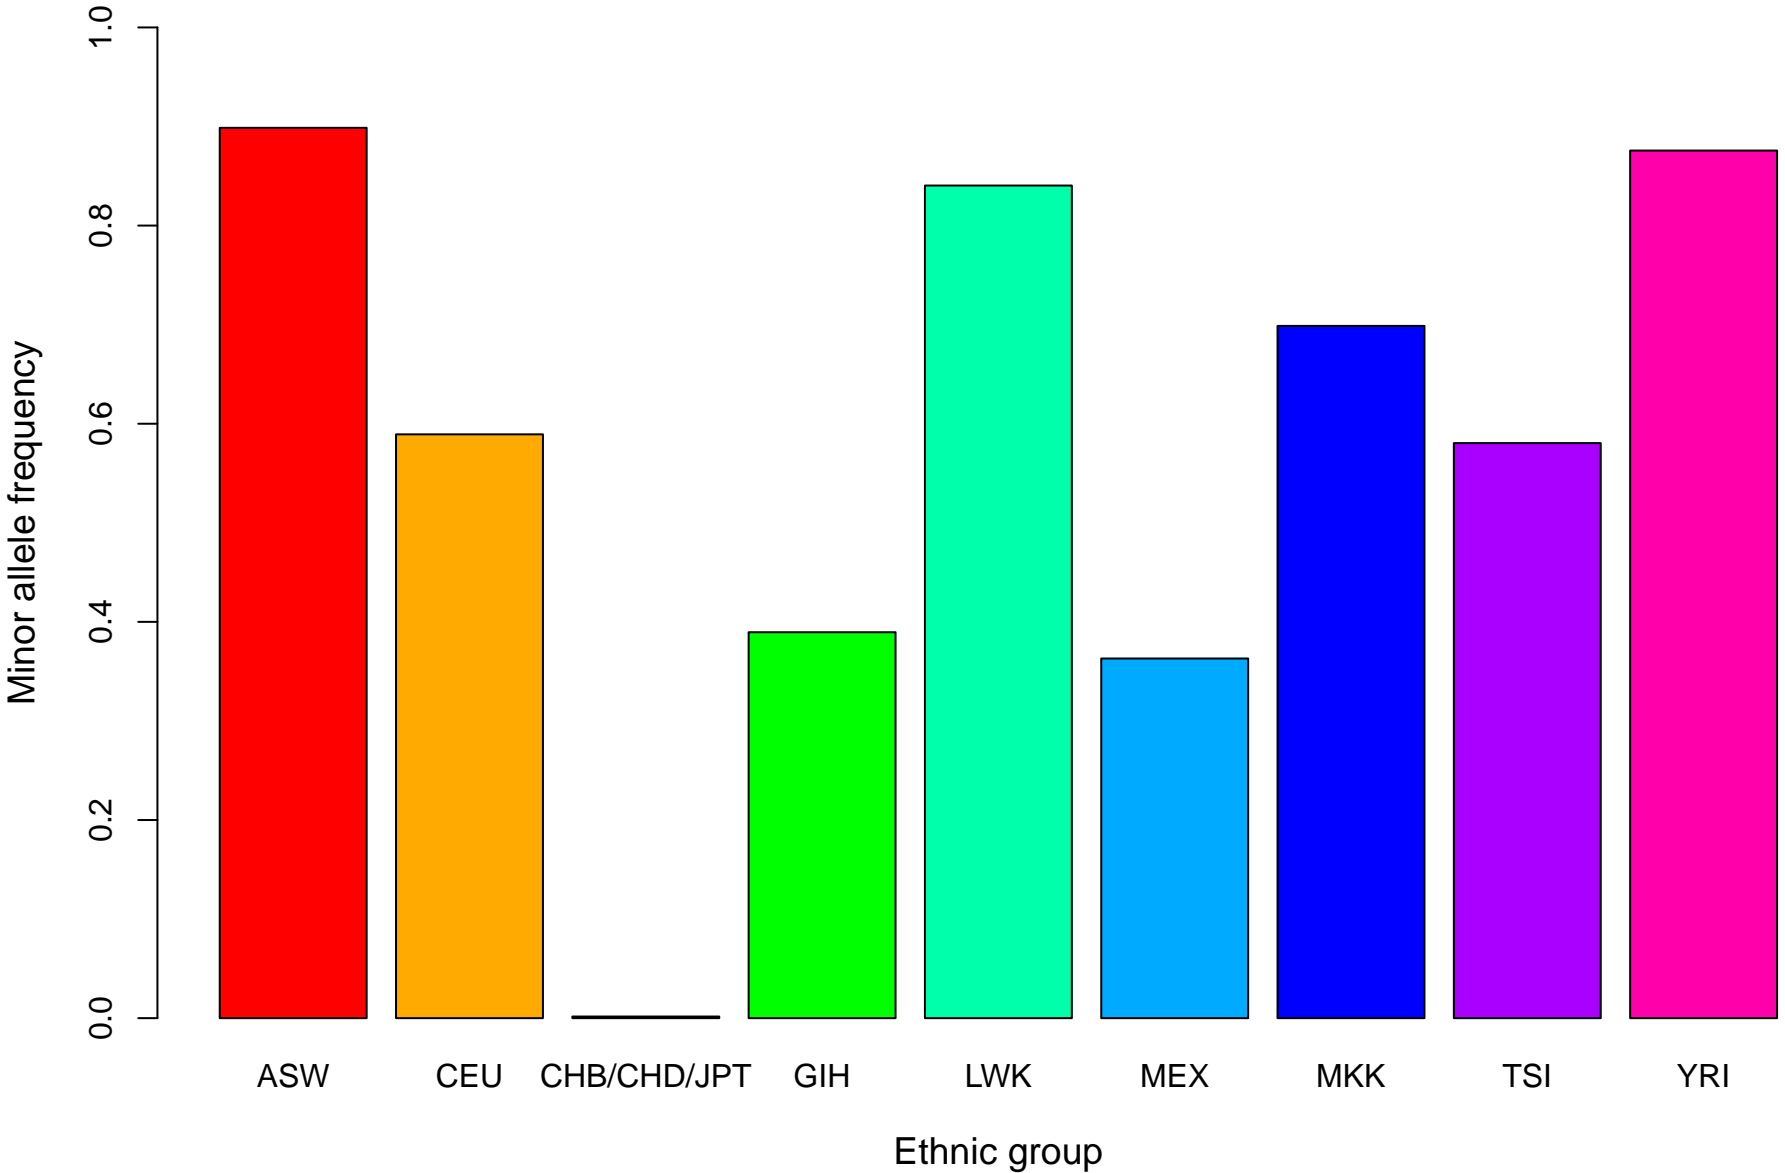

# rs6744758\_T

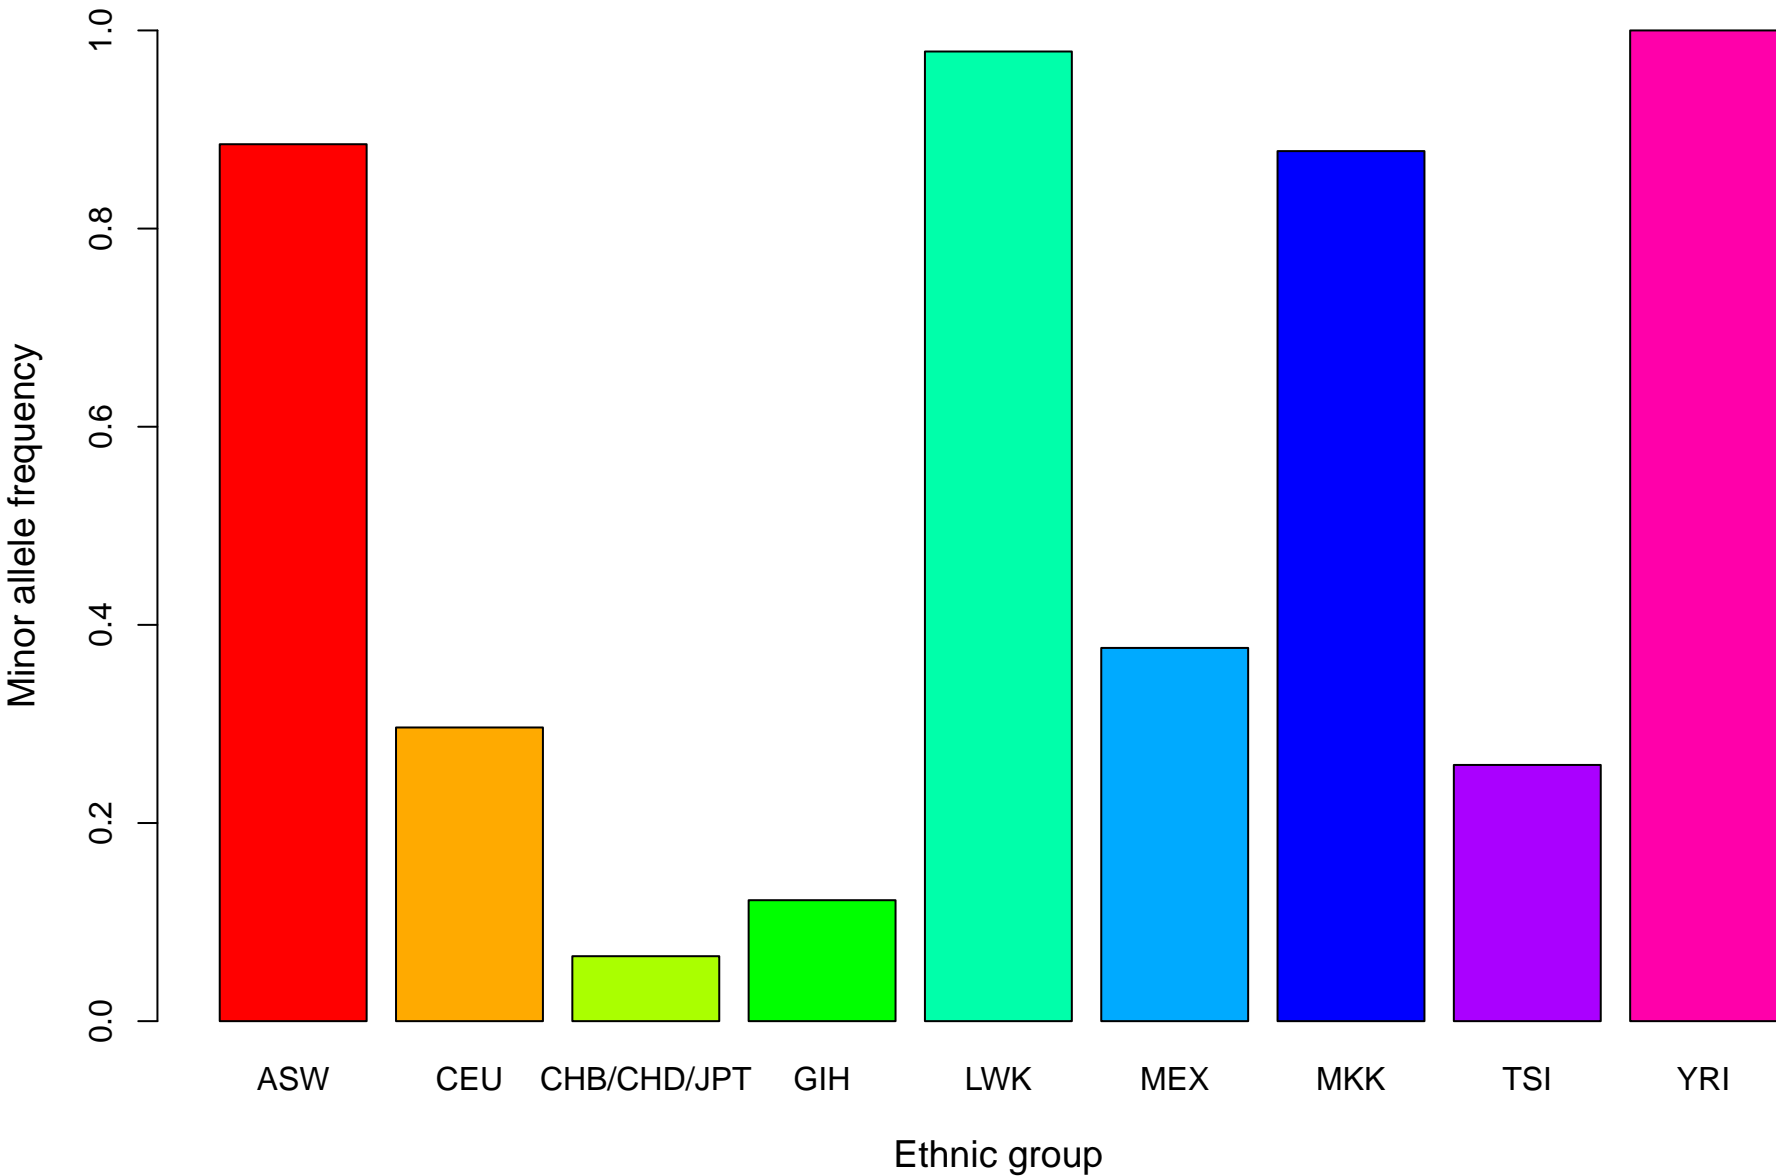

# rs2250072\_A

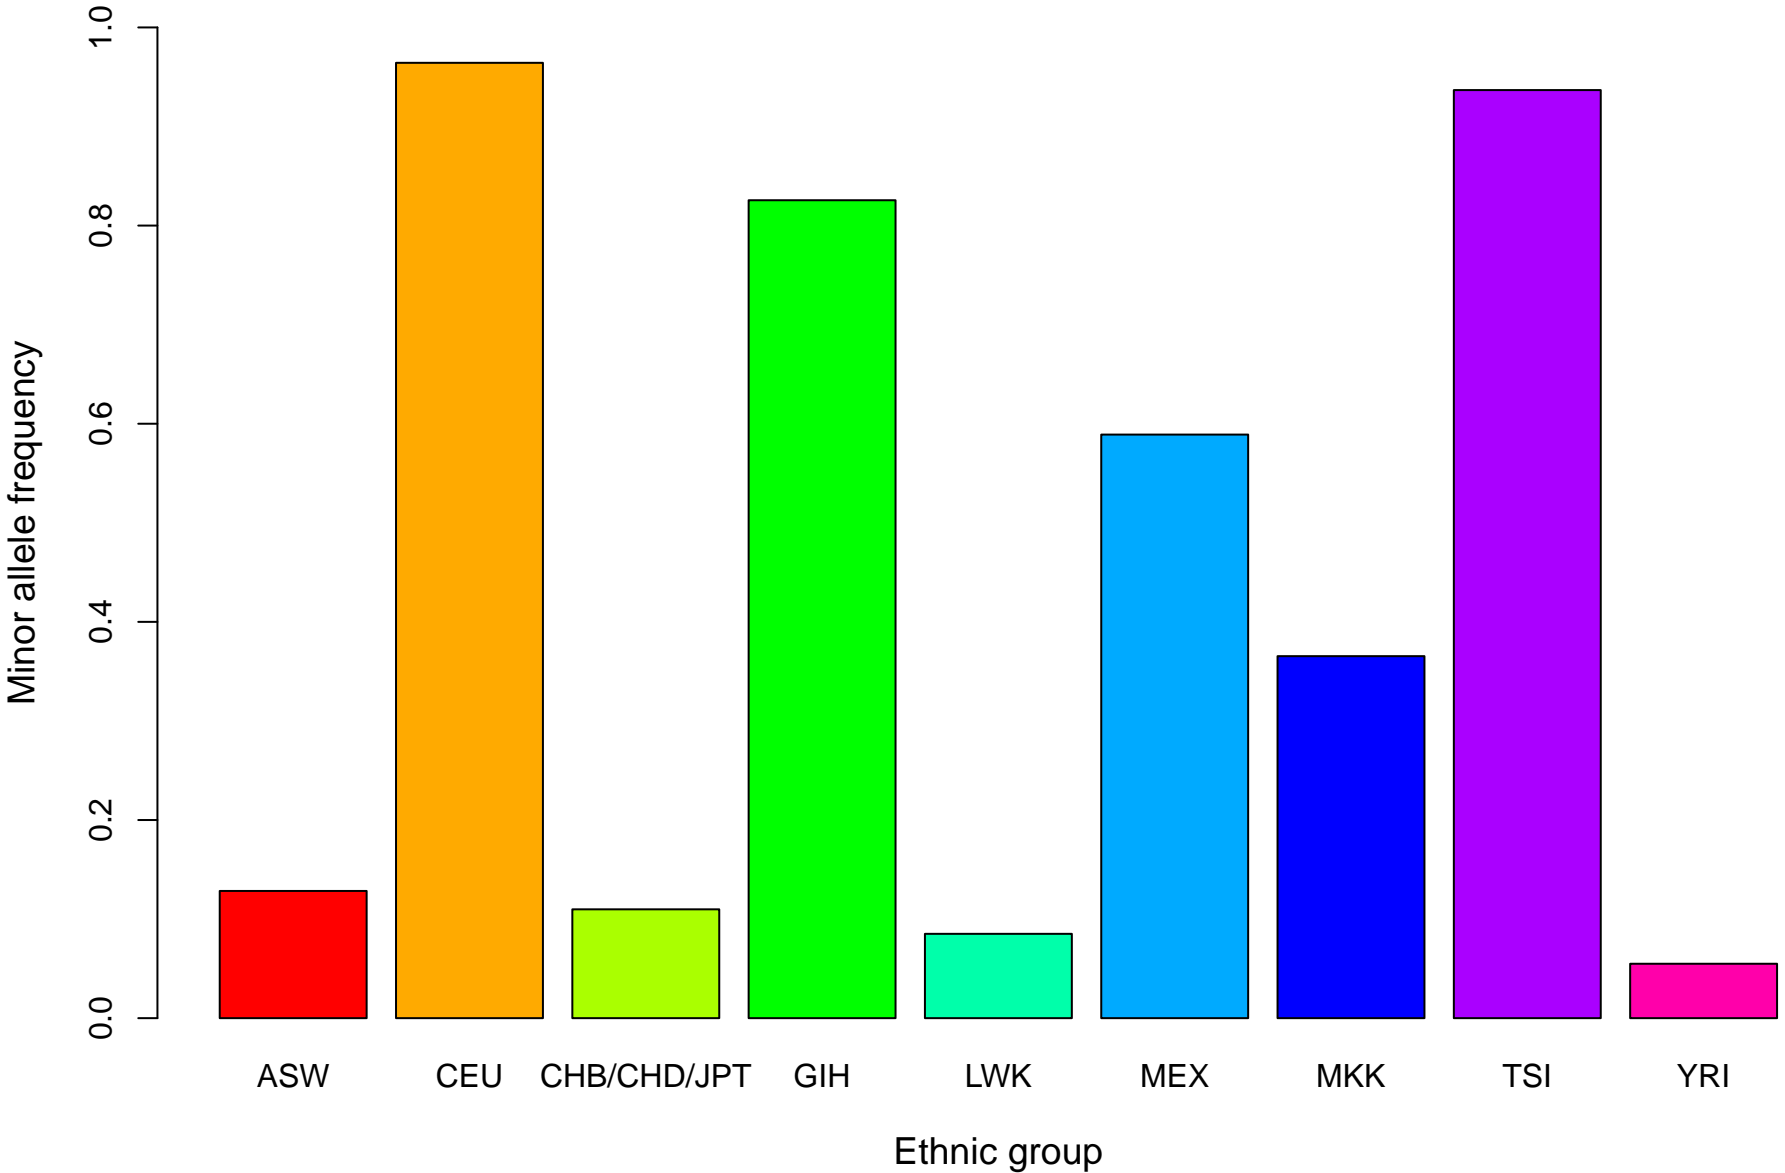



# rs10735227\_C

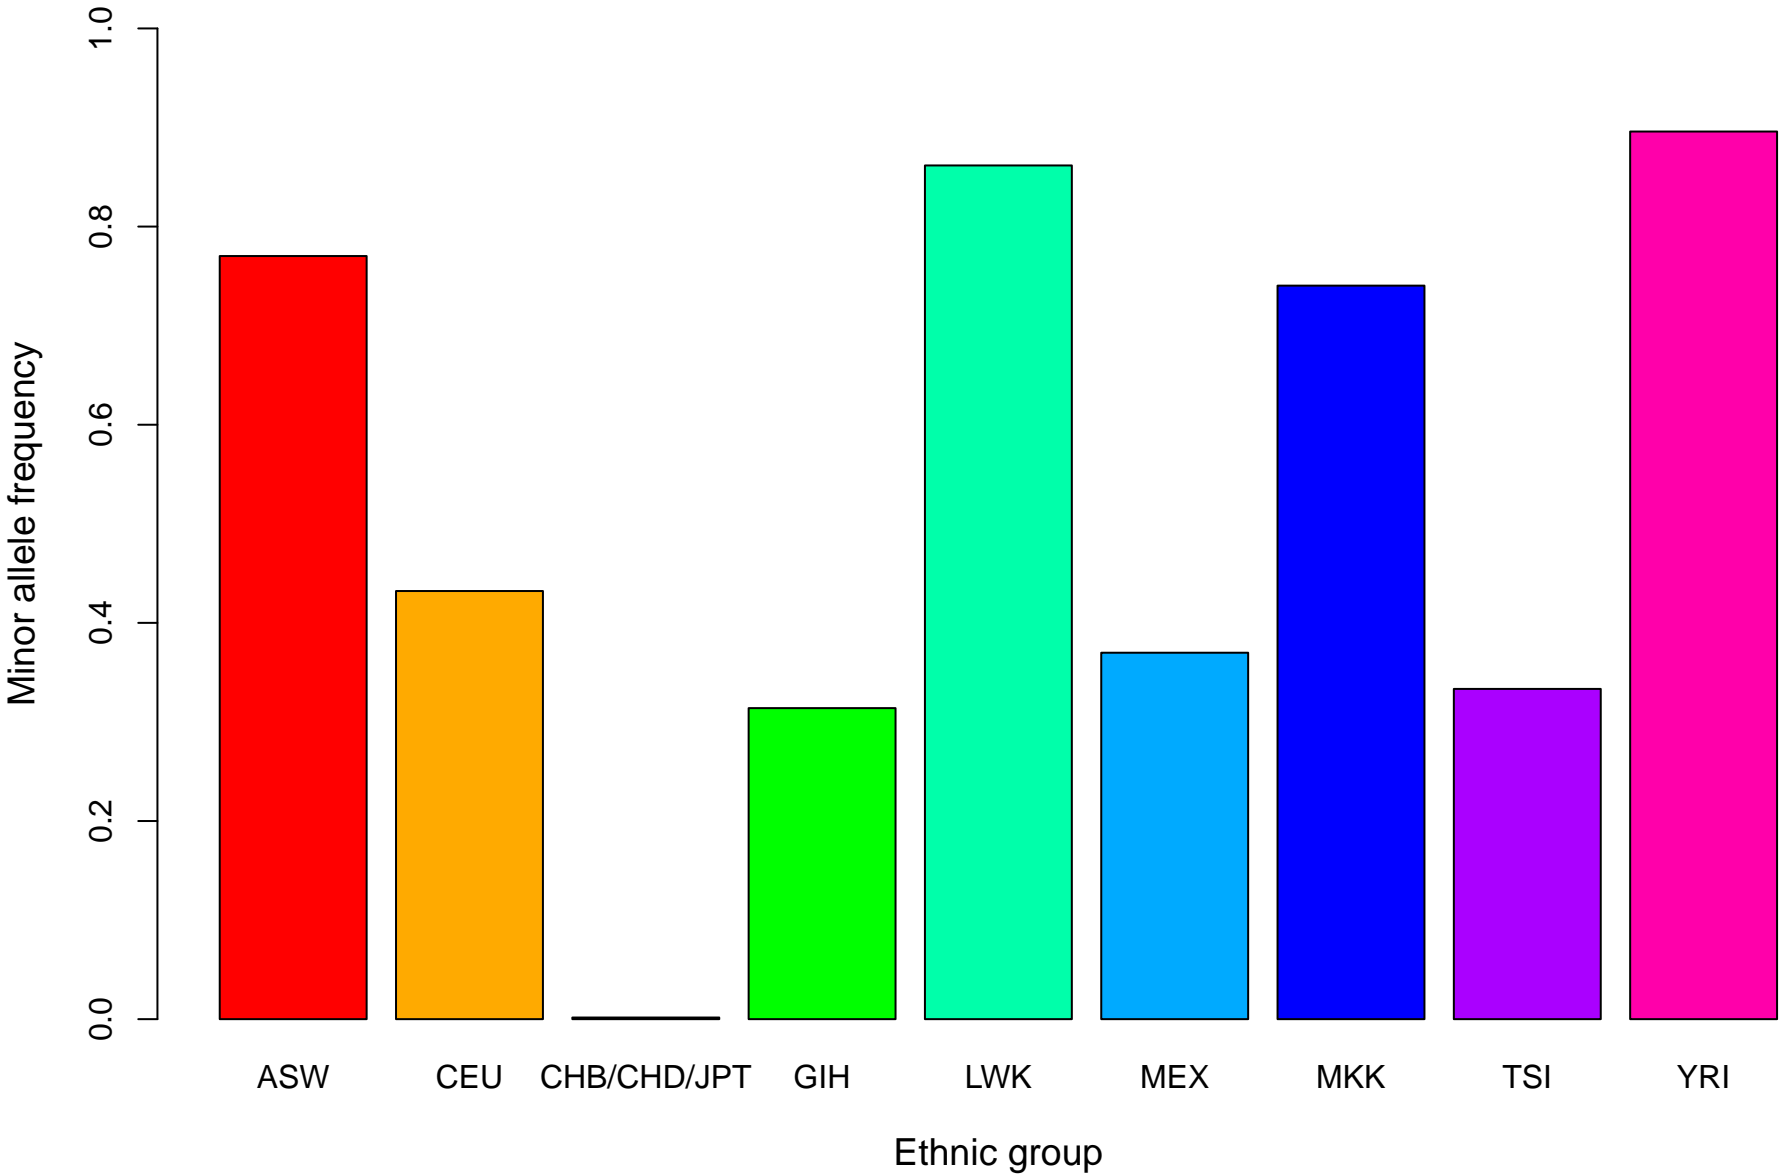

# rs4341955\_G

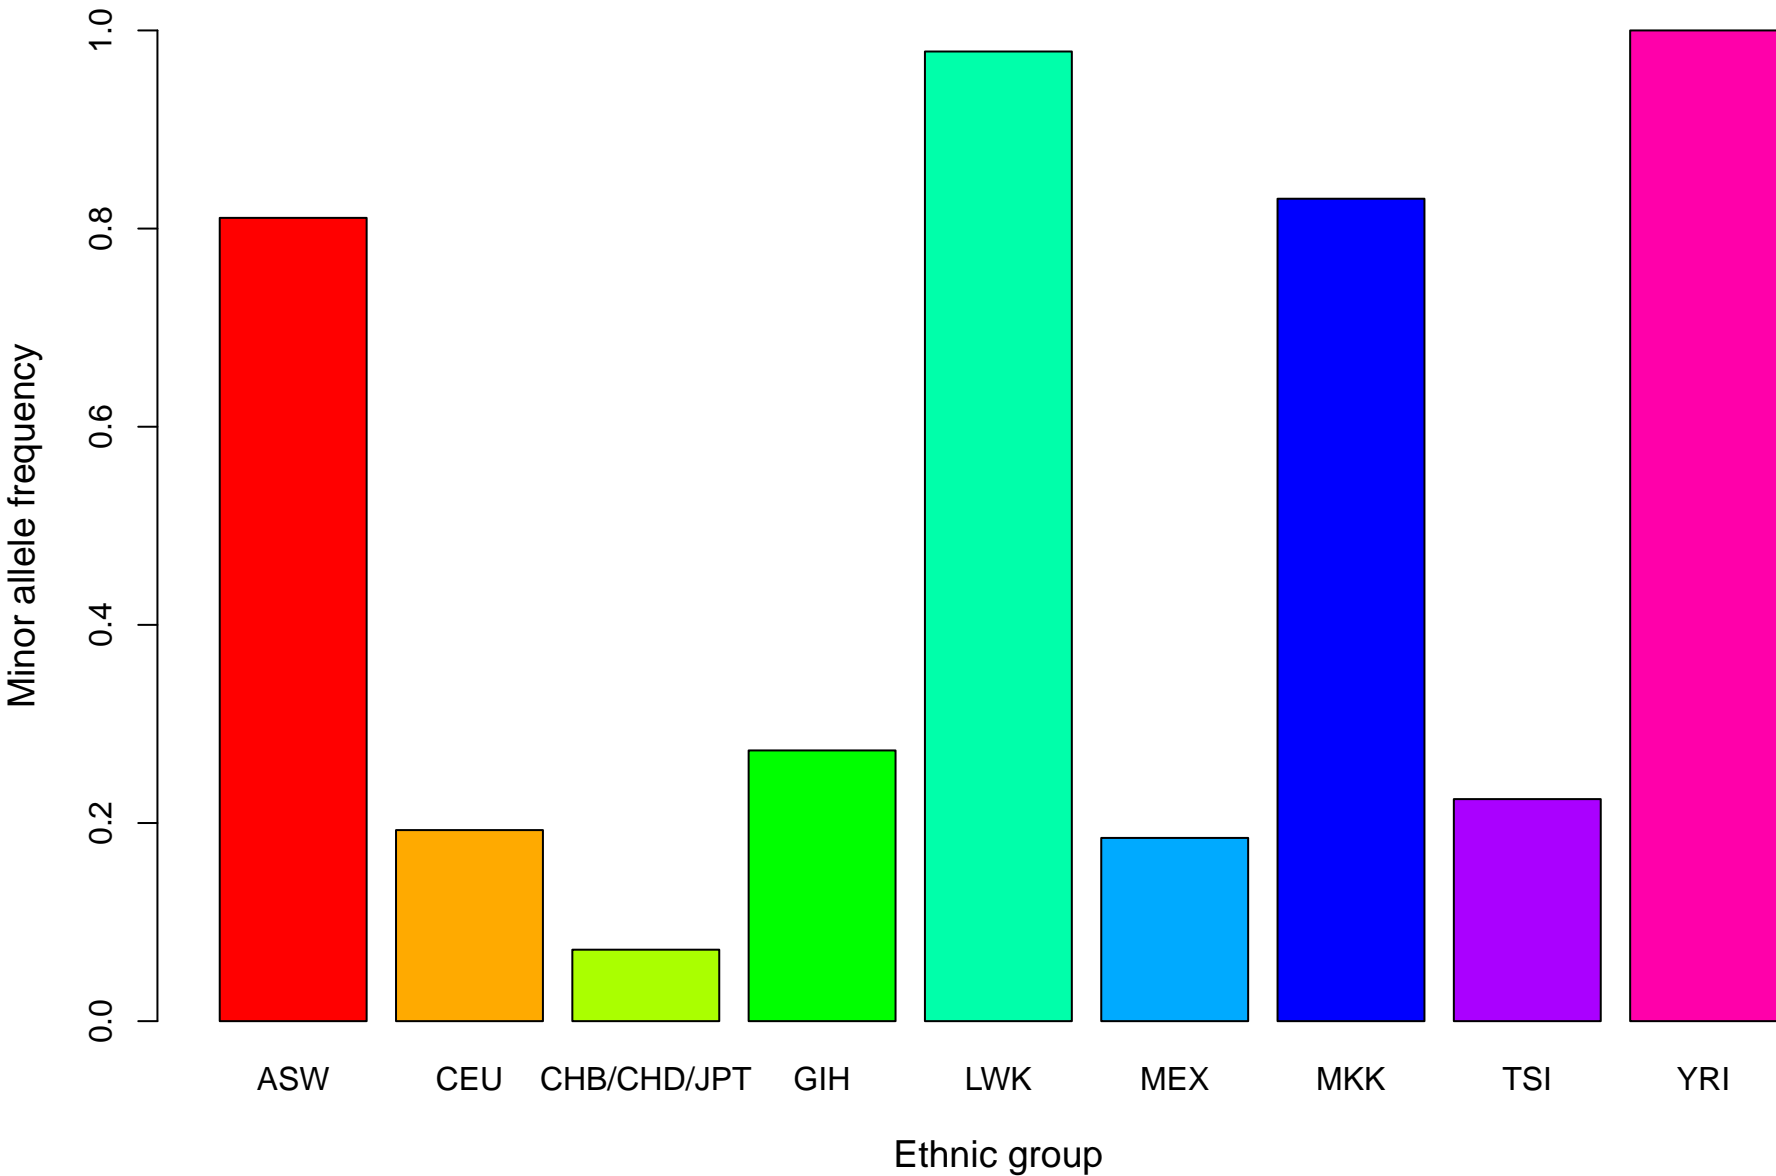

# rs12135904\_T

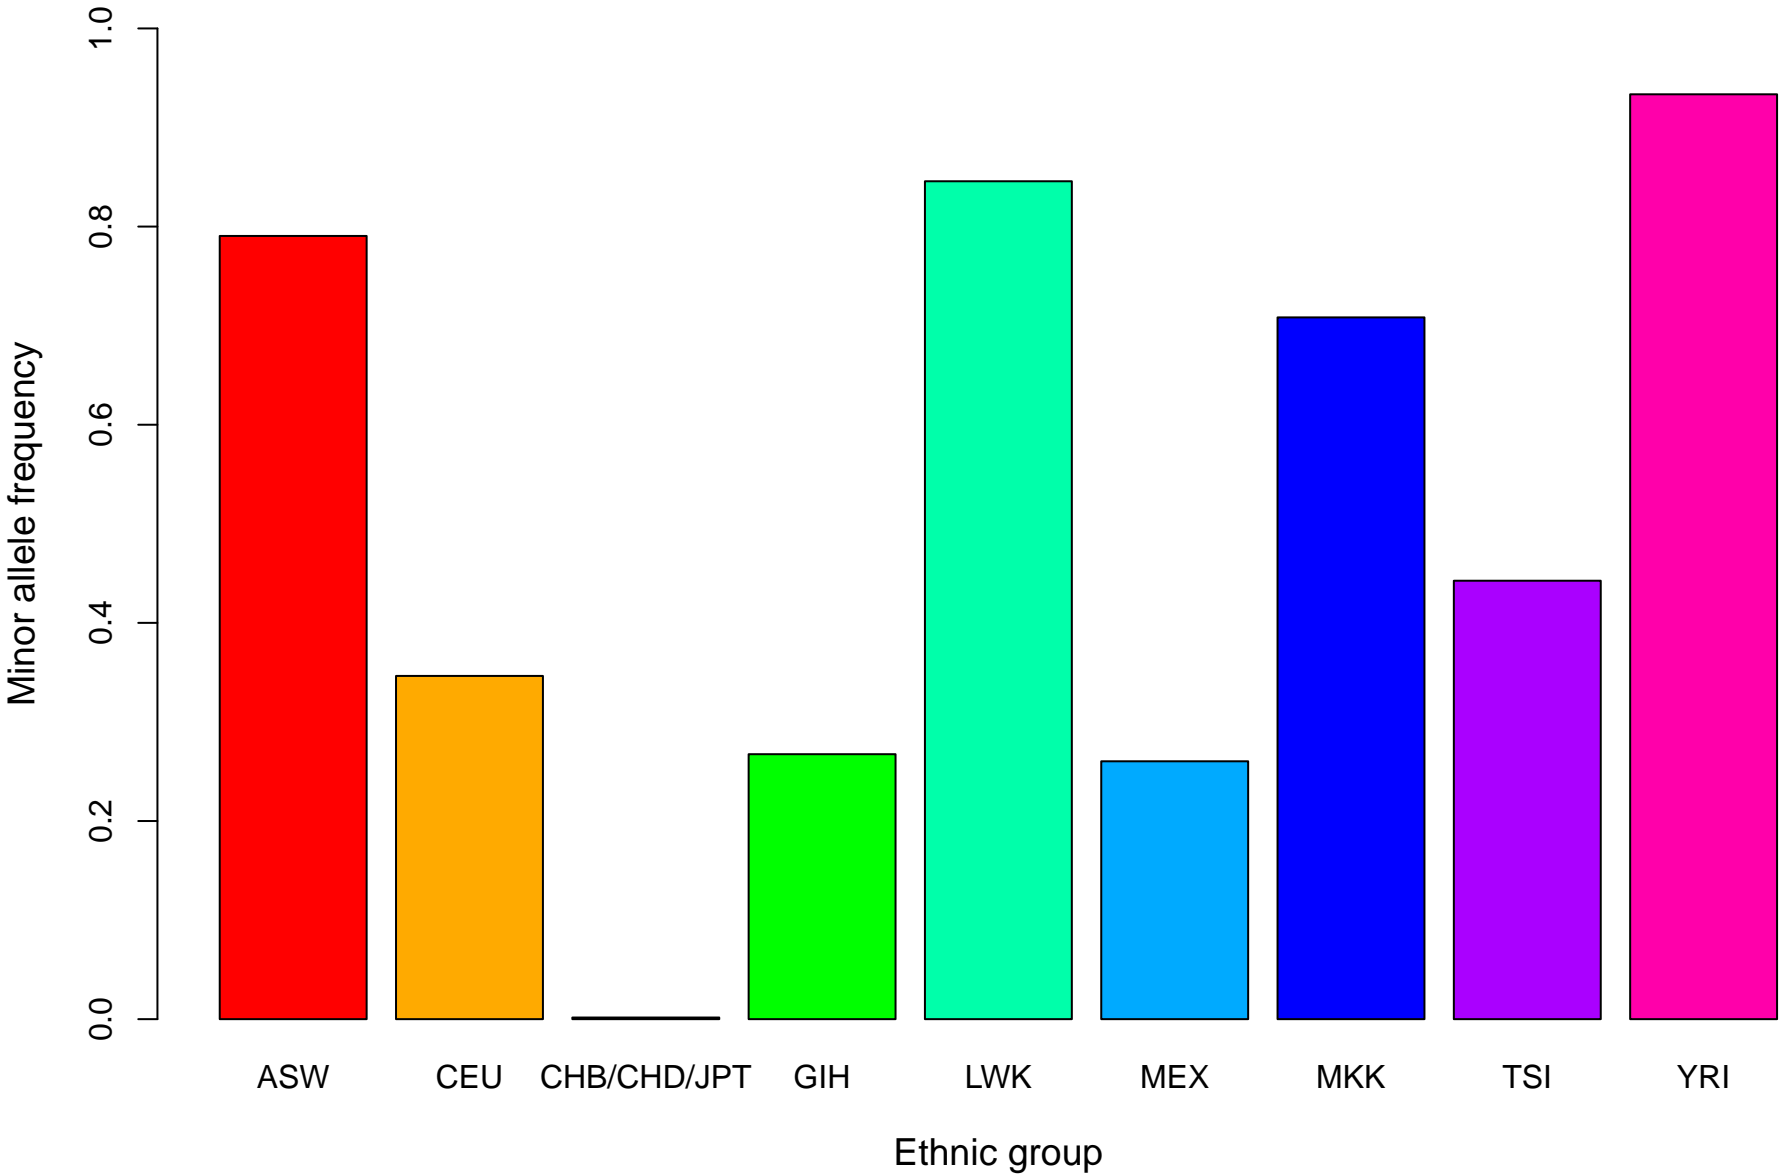

# rs7894459\_T

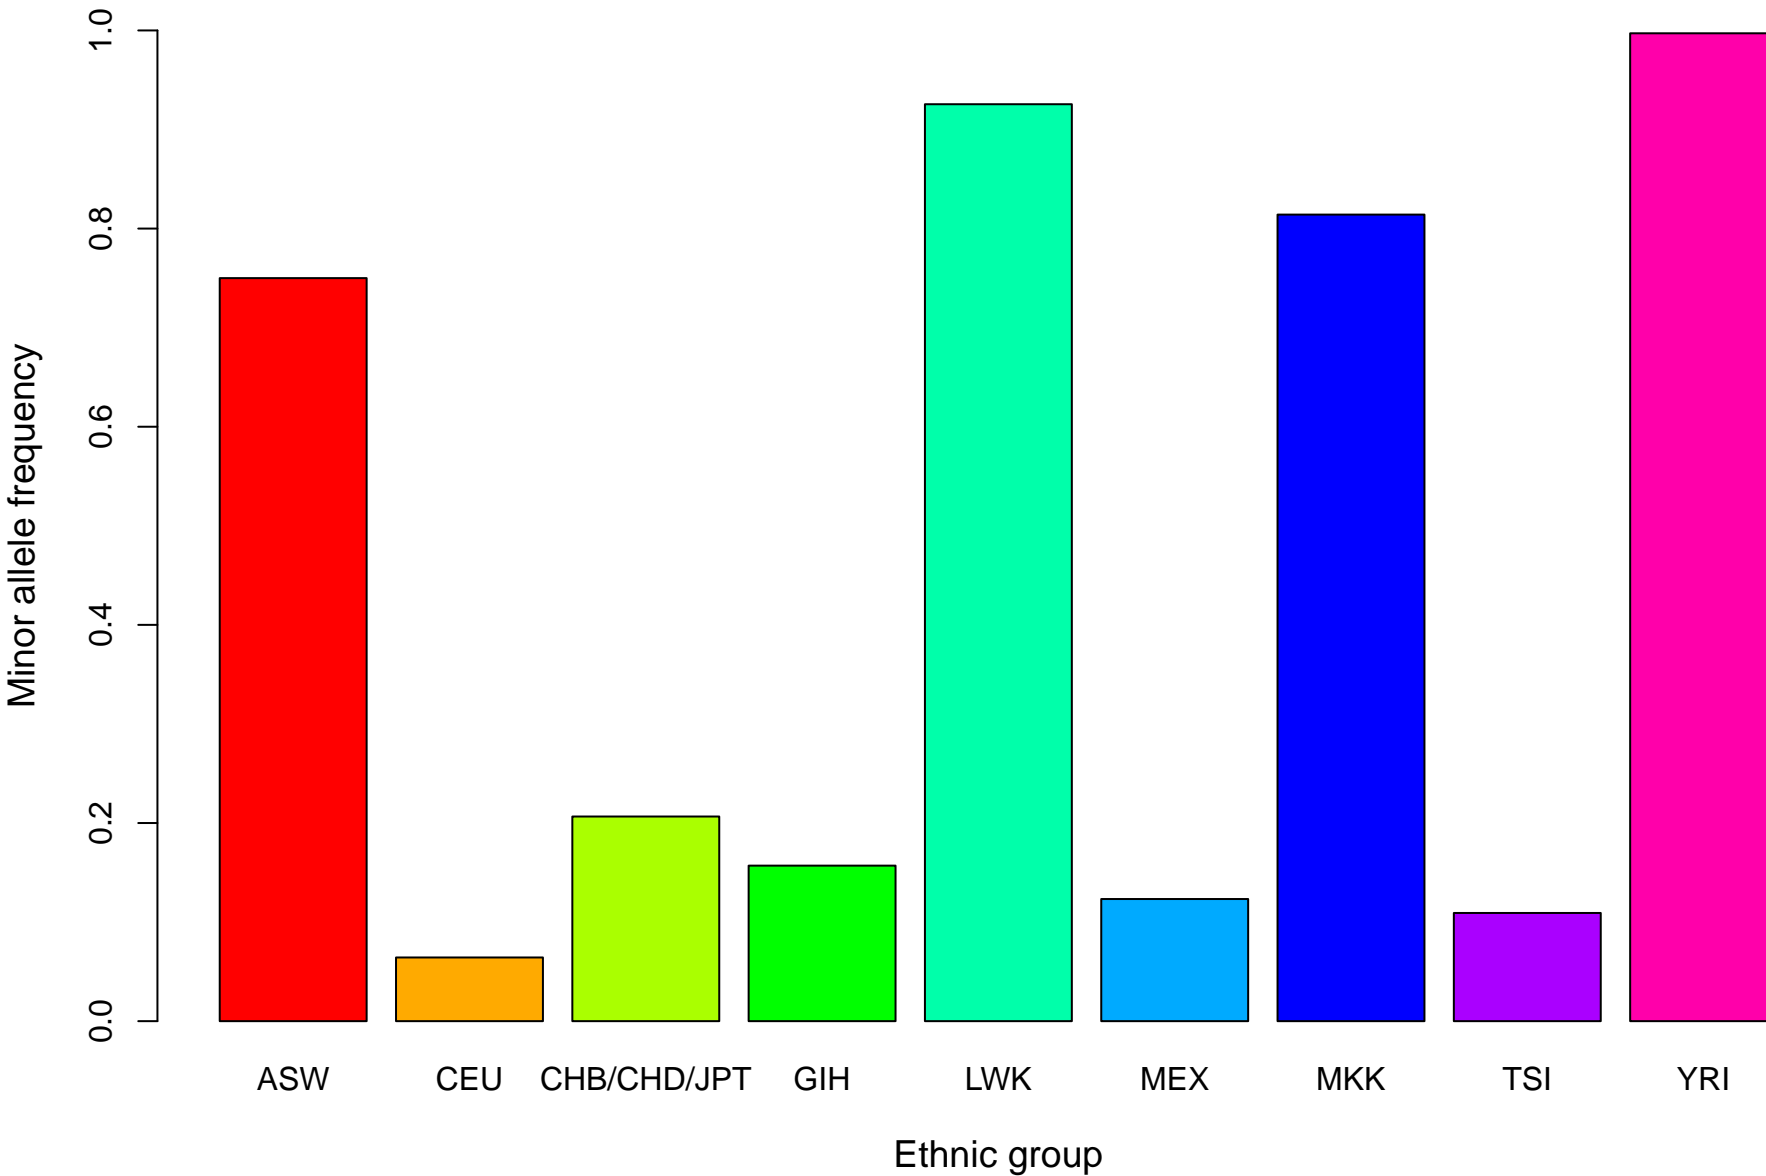

# rs9550774\_C

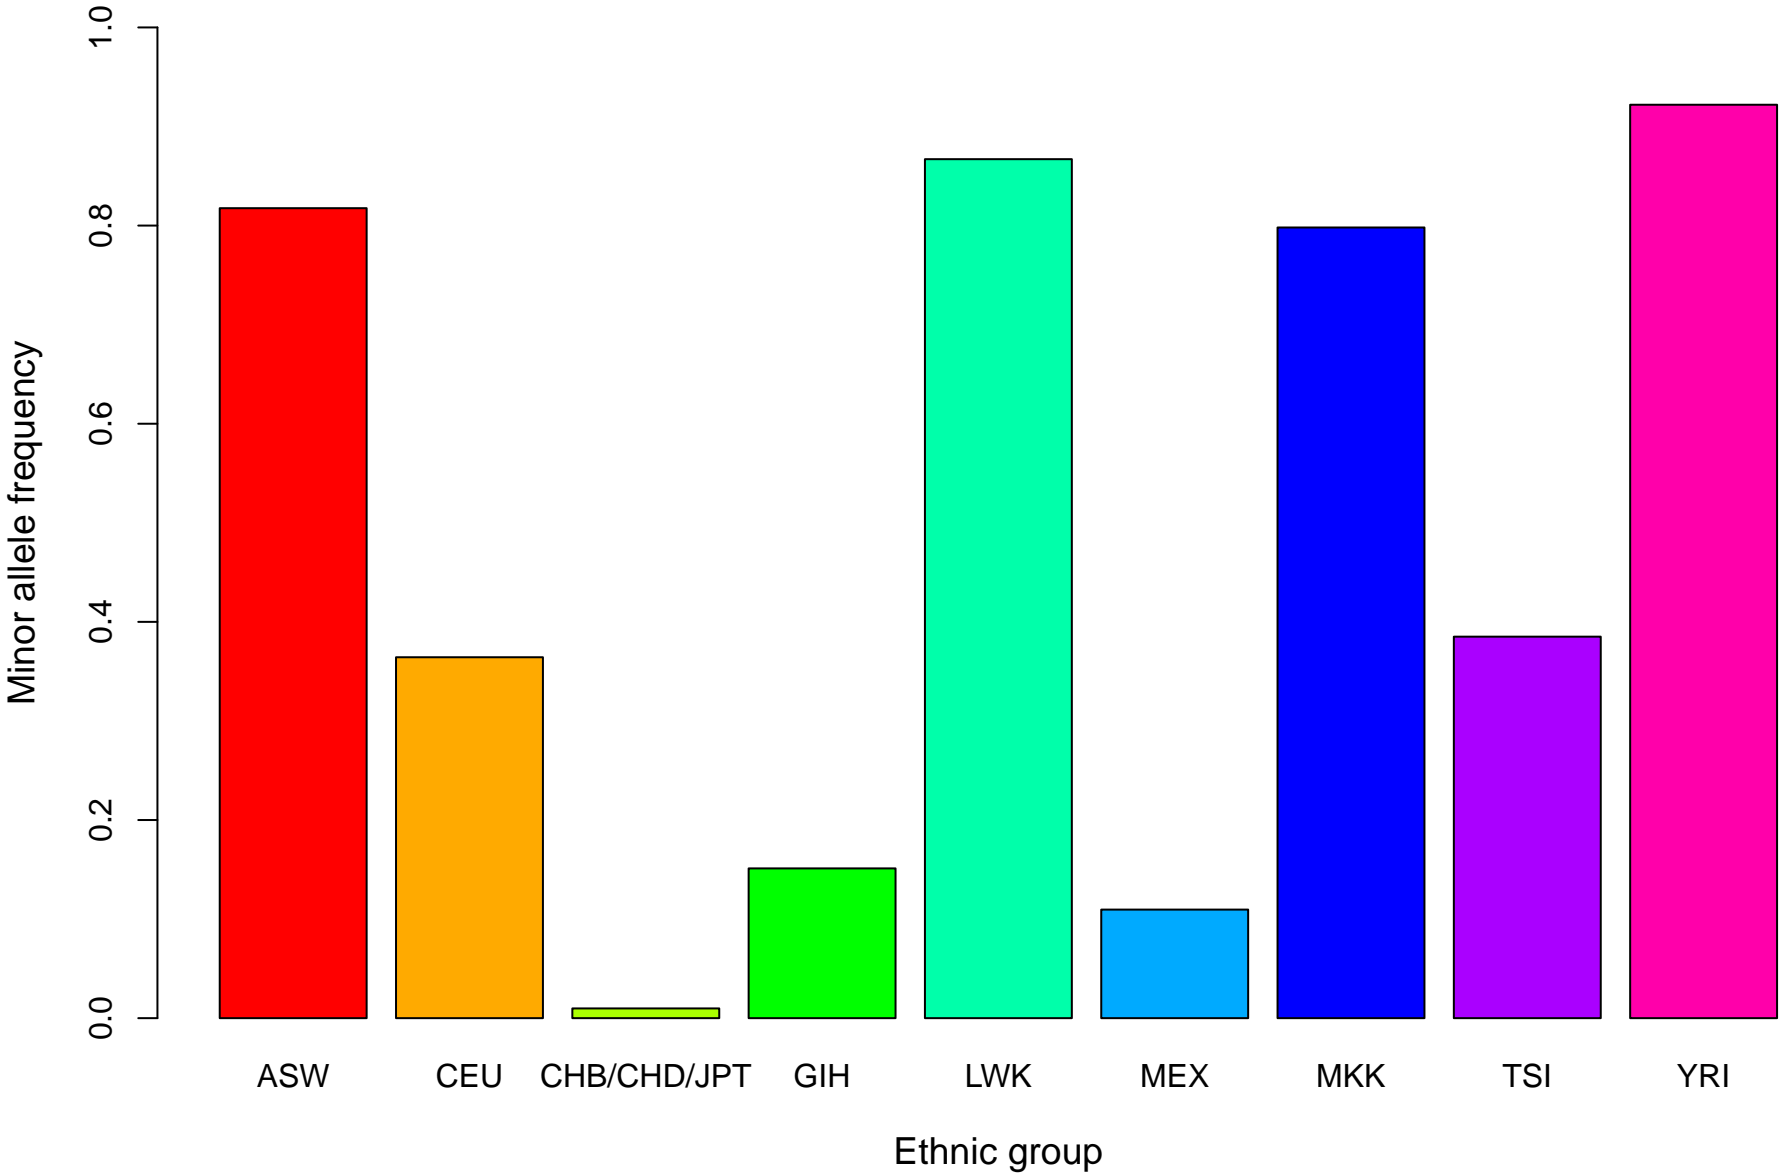

# rs10079352\_G

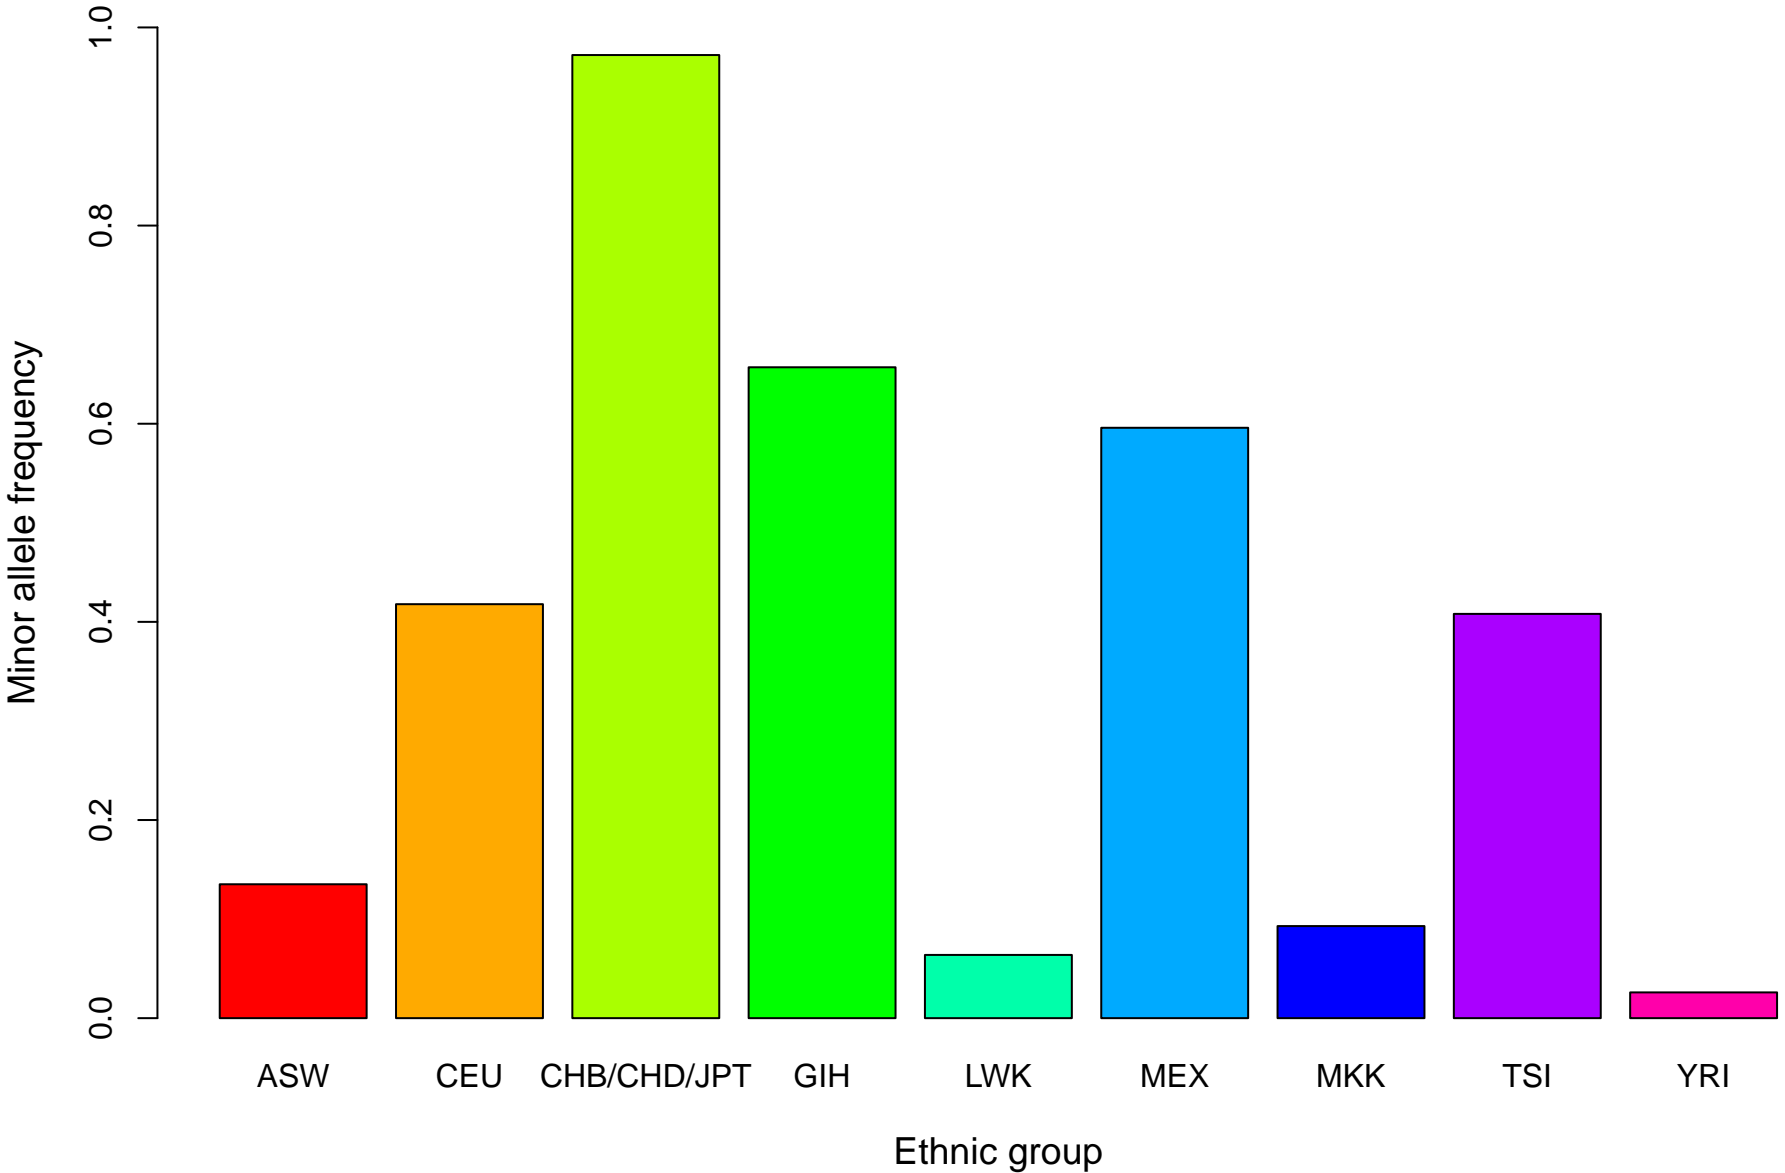

# rs798790\_C

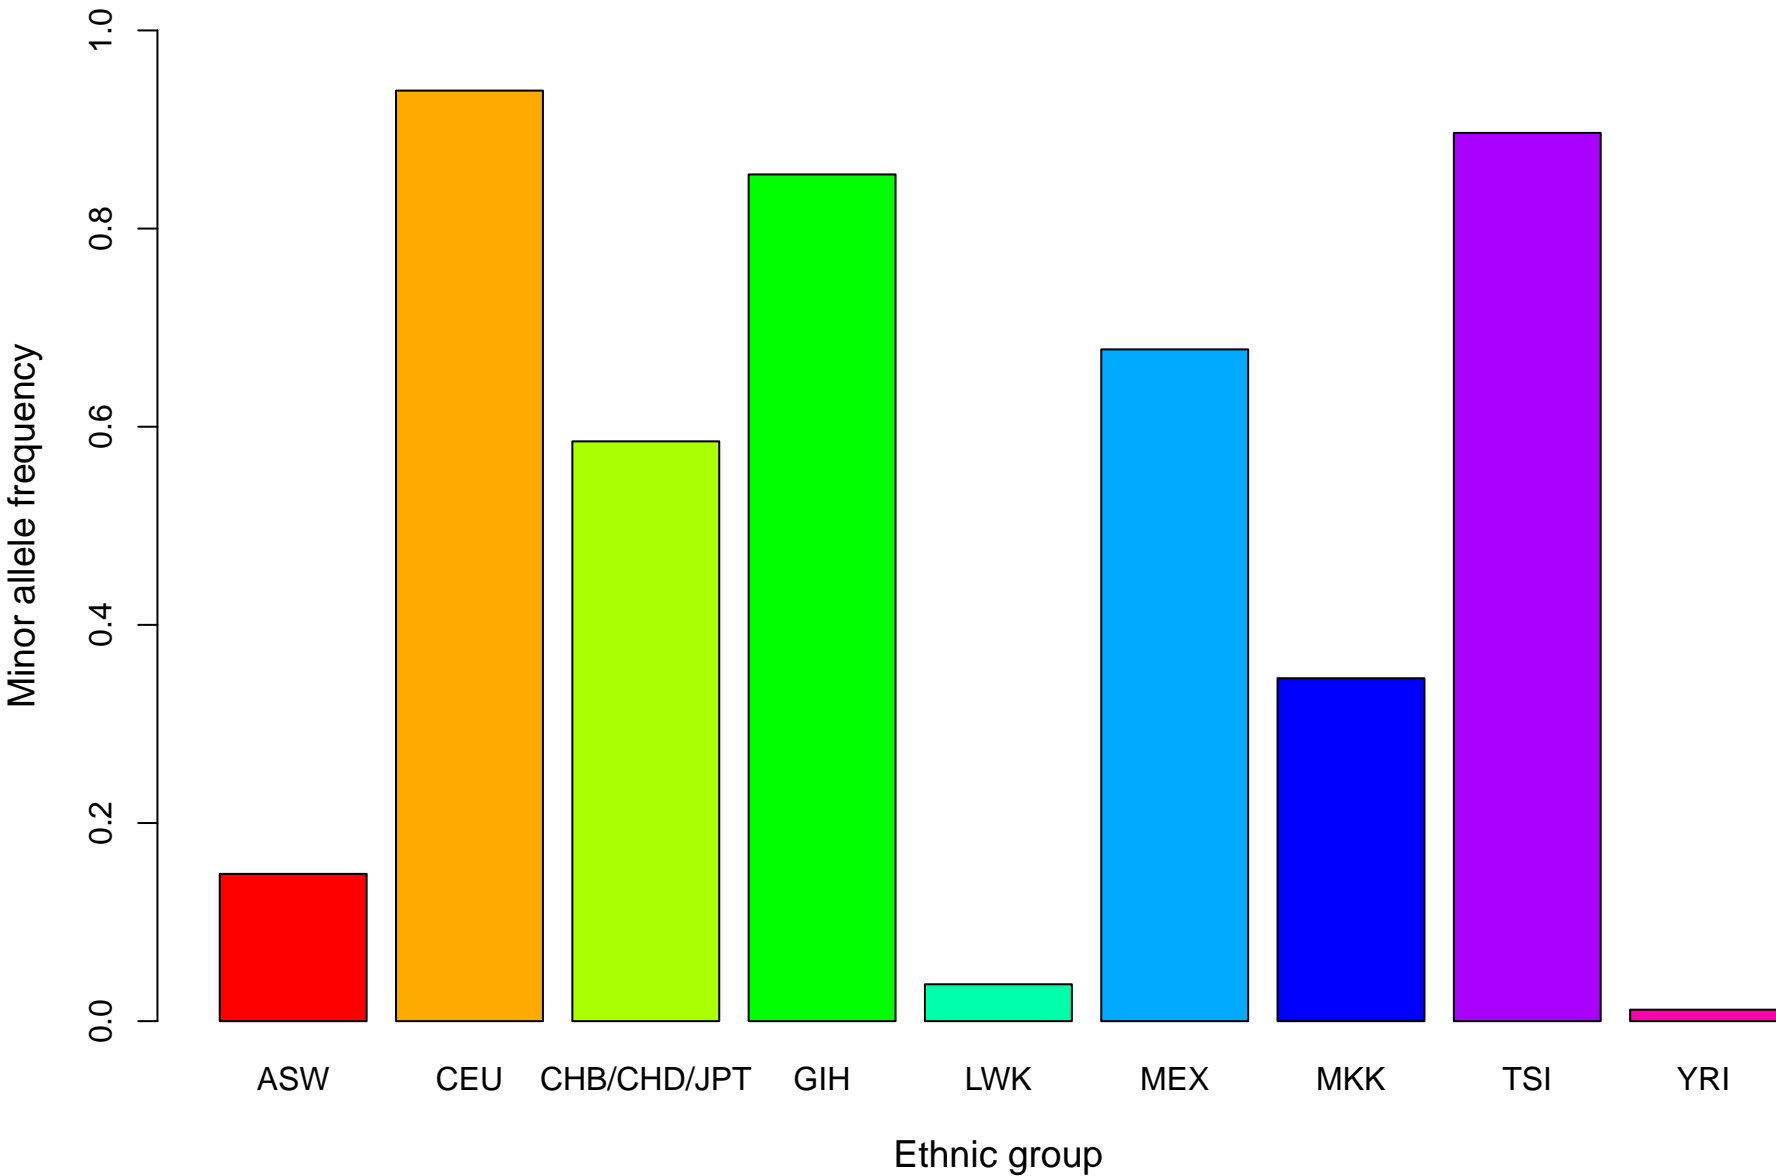

# rs1005680\_A

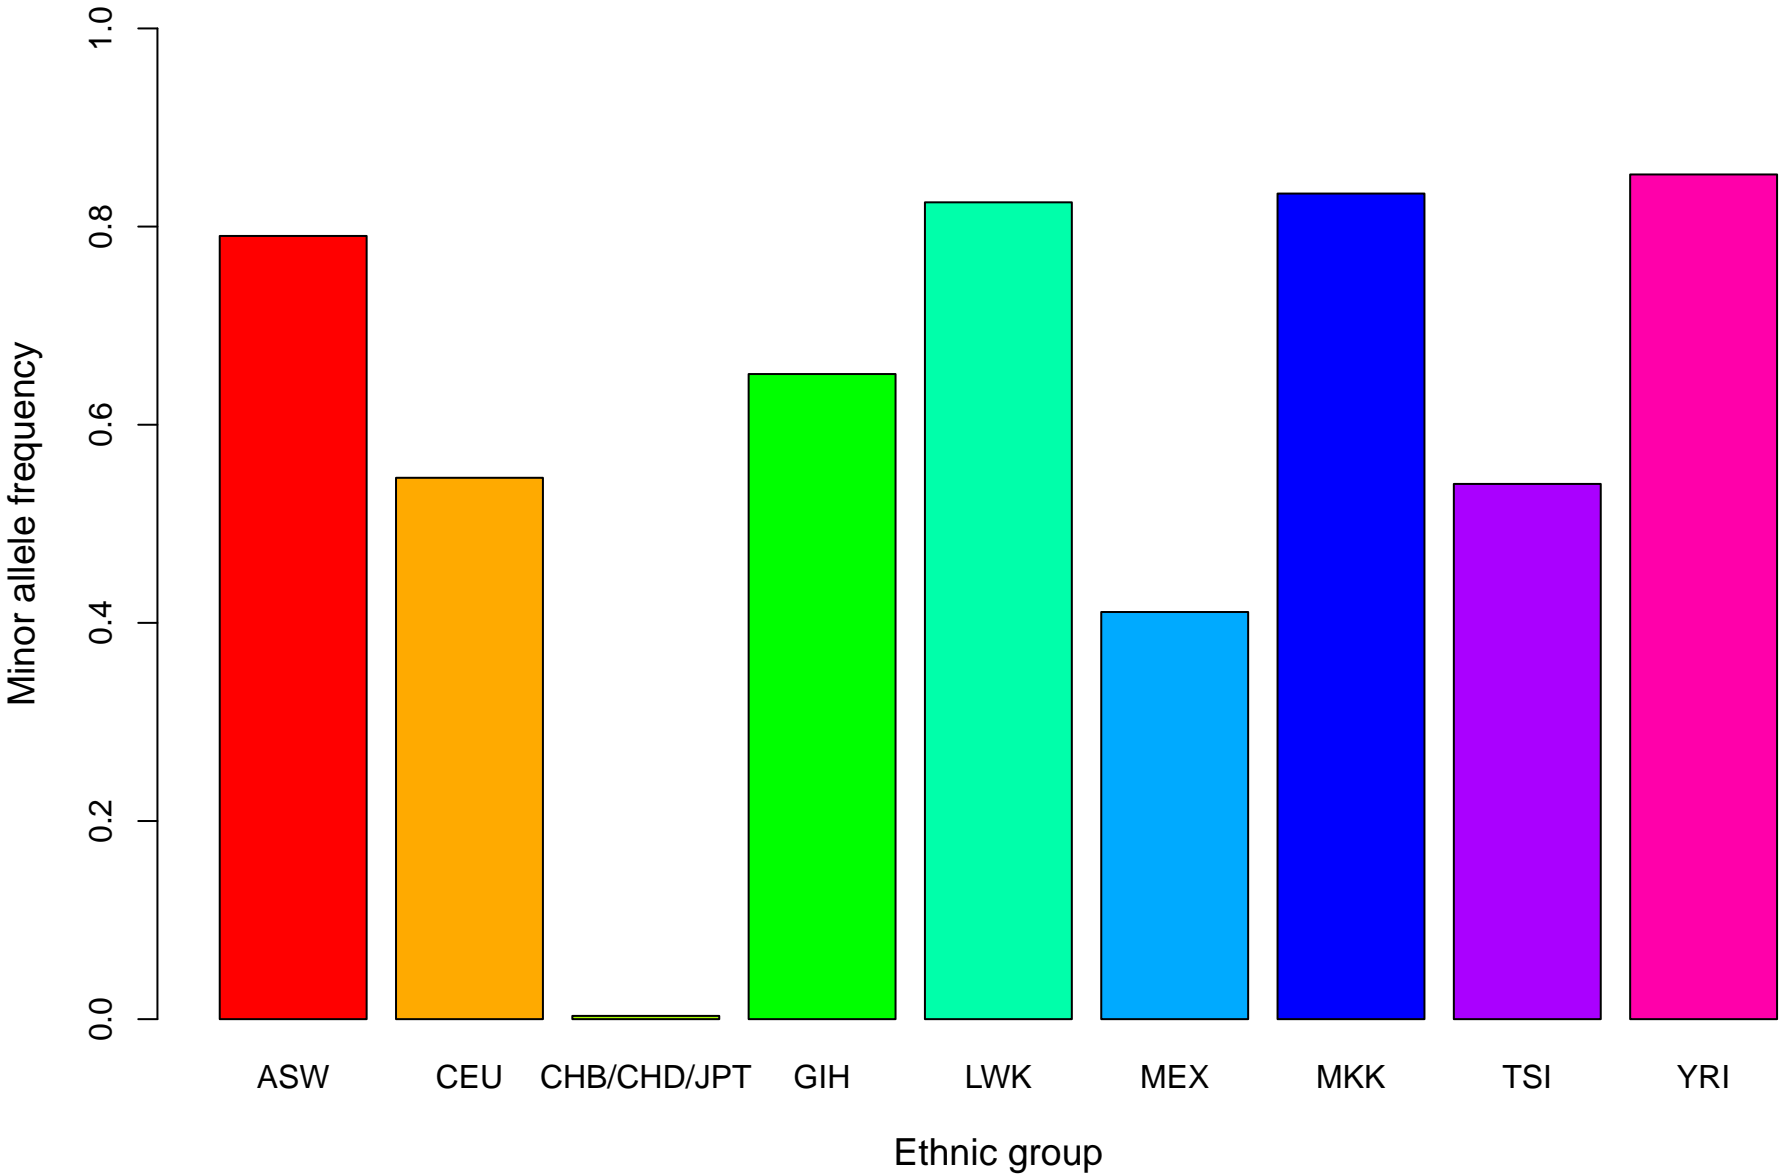



# rs2454422\_G

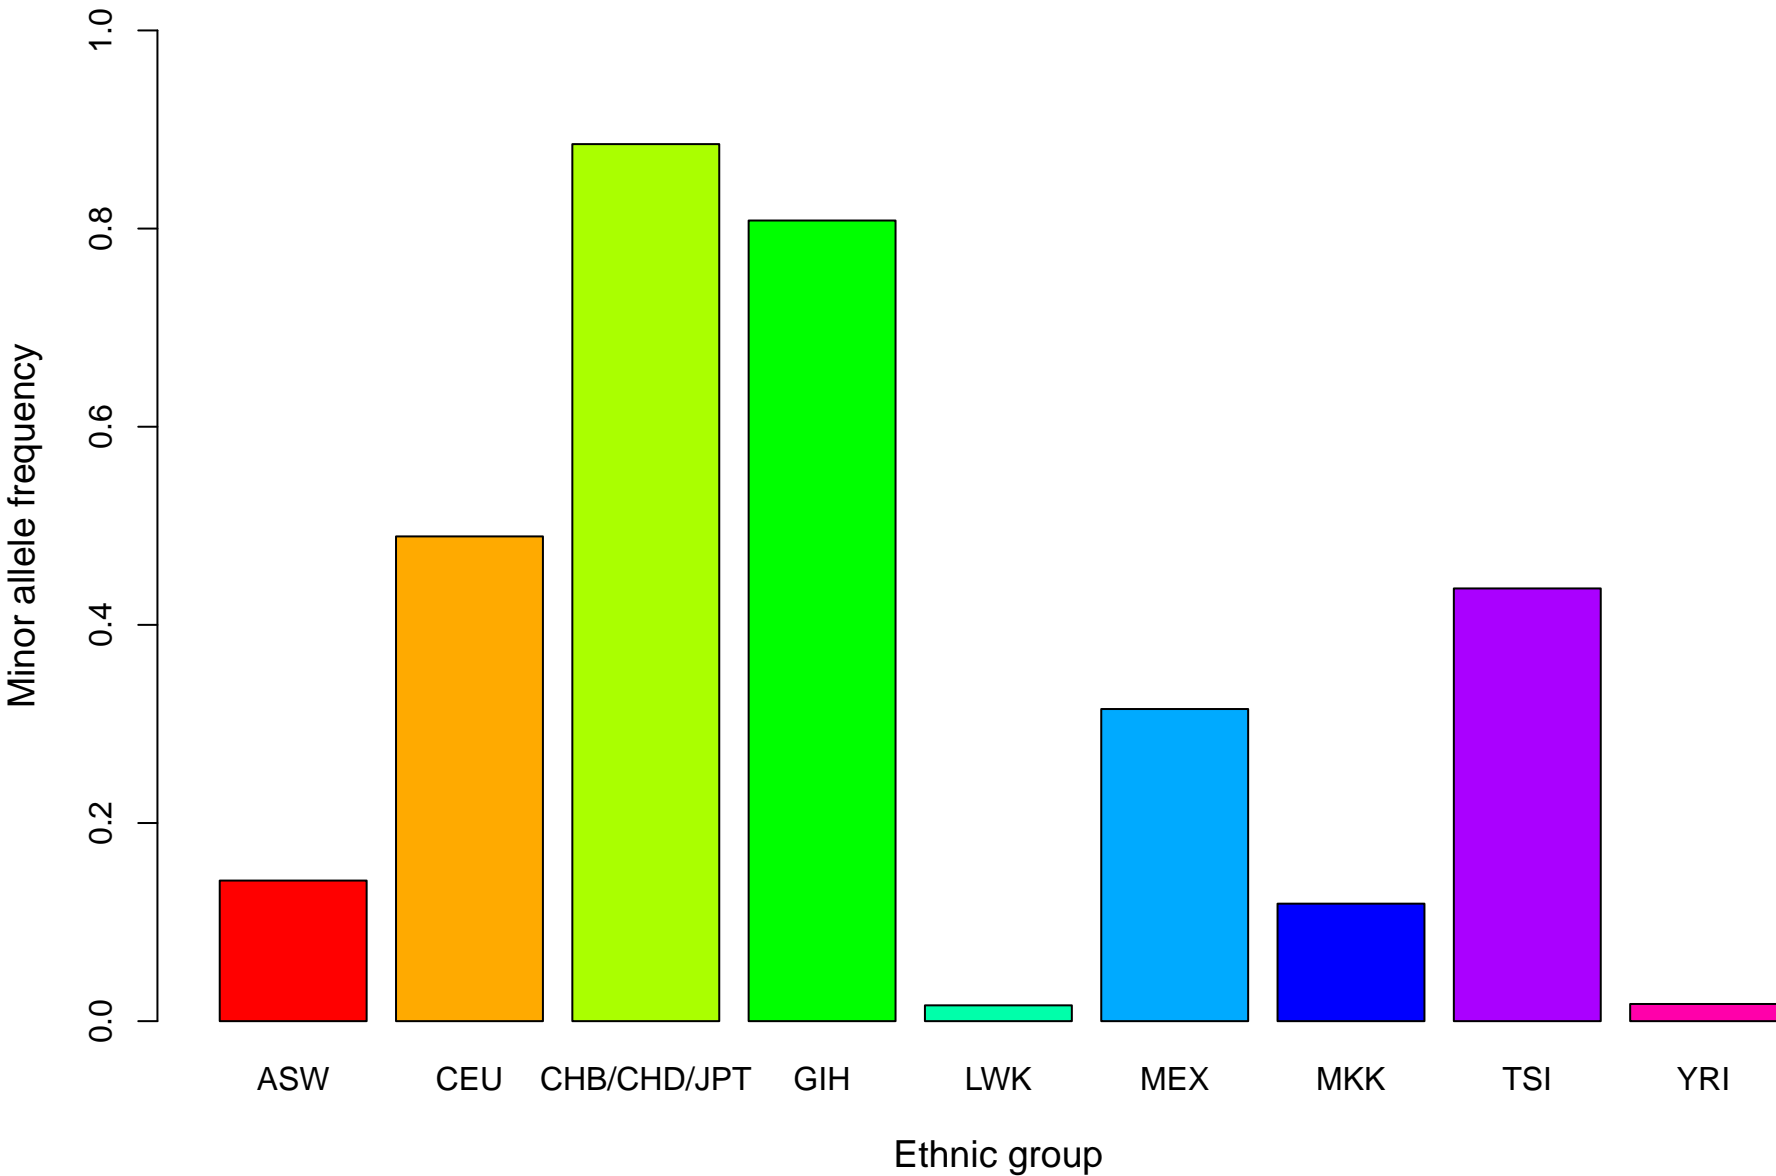

# rs10741784\_A

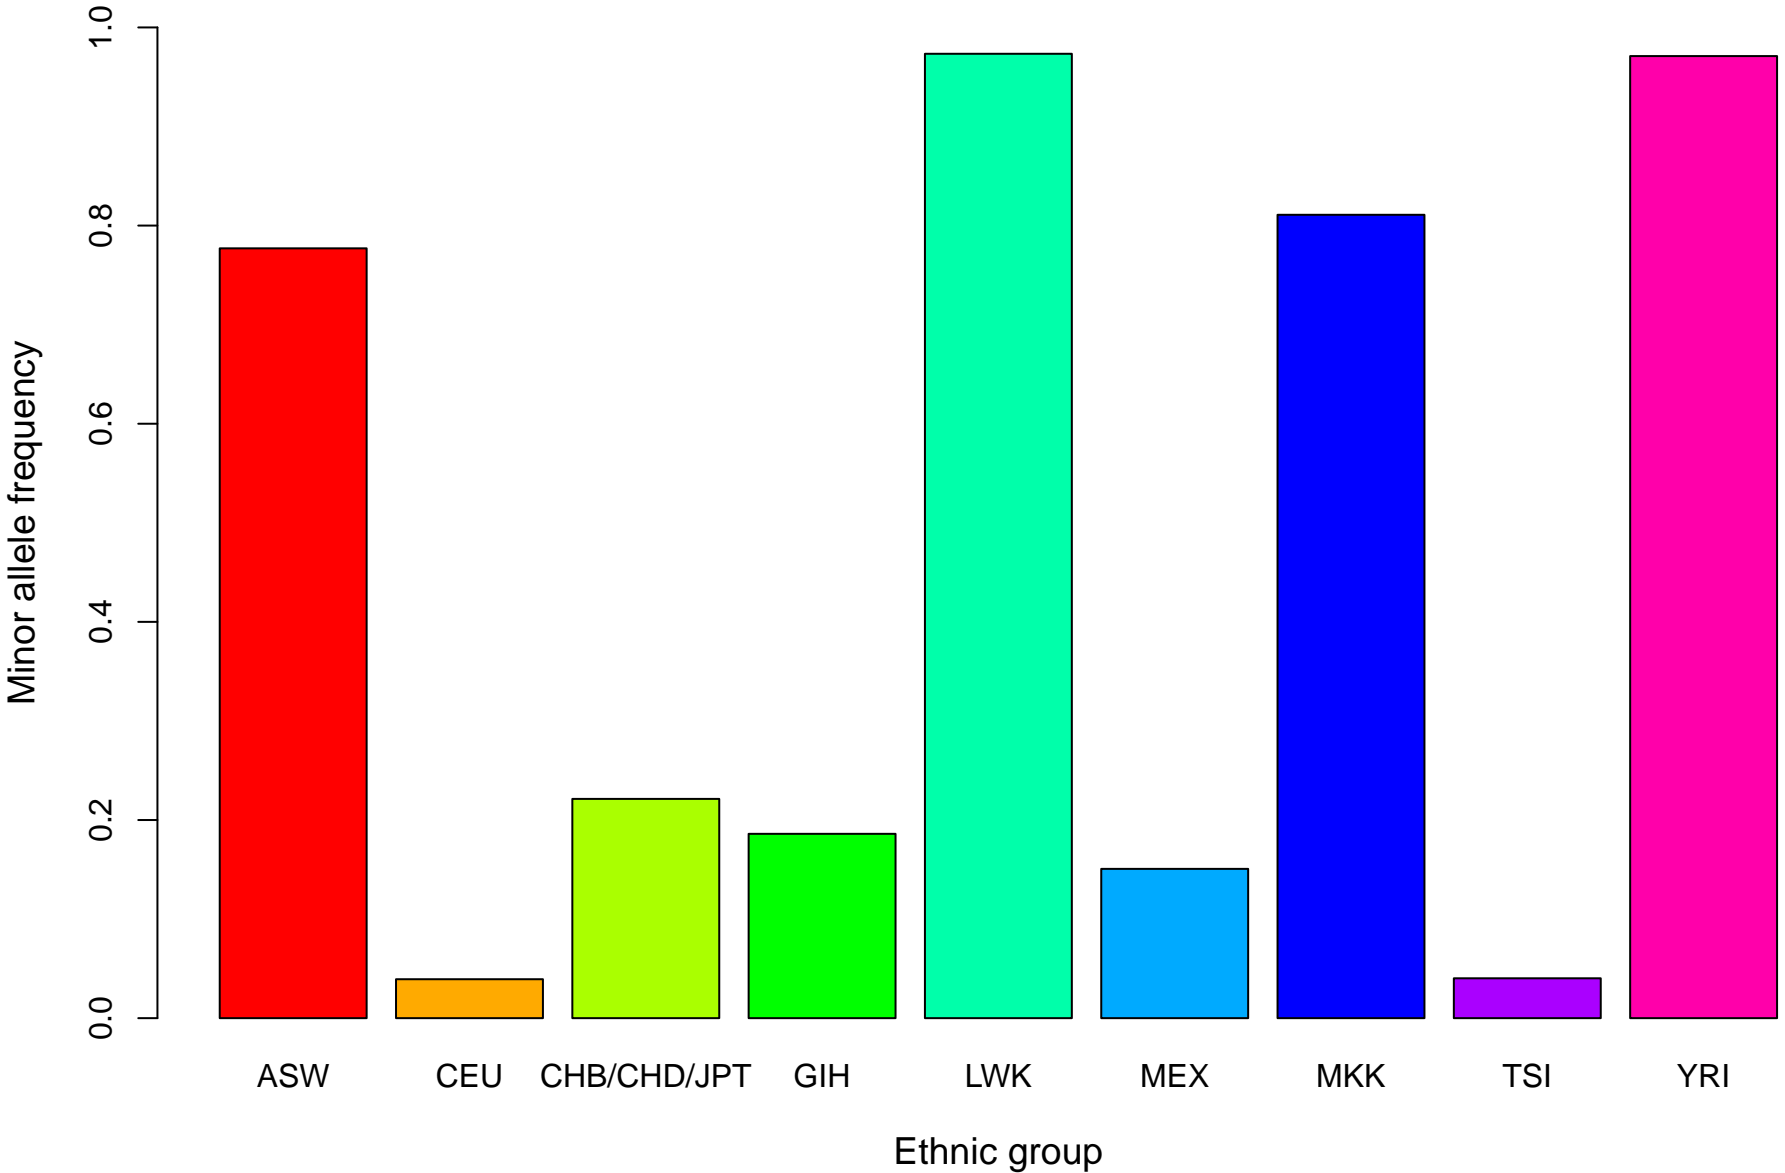

# rs35407\_G

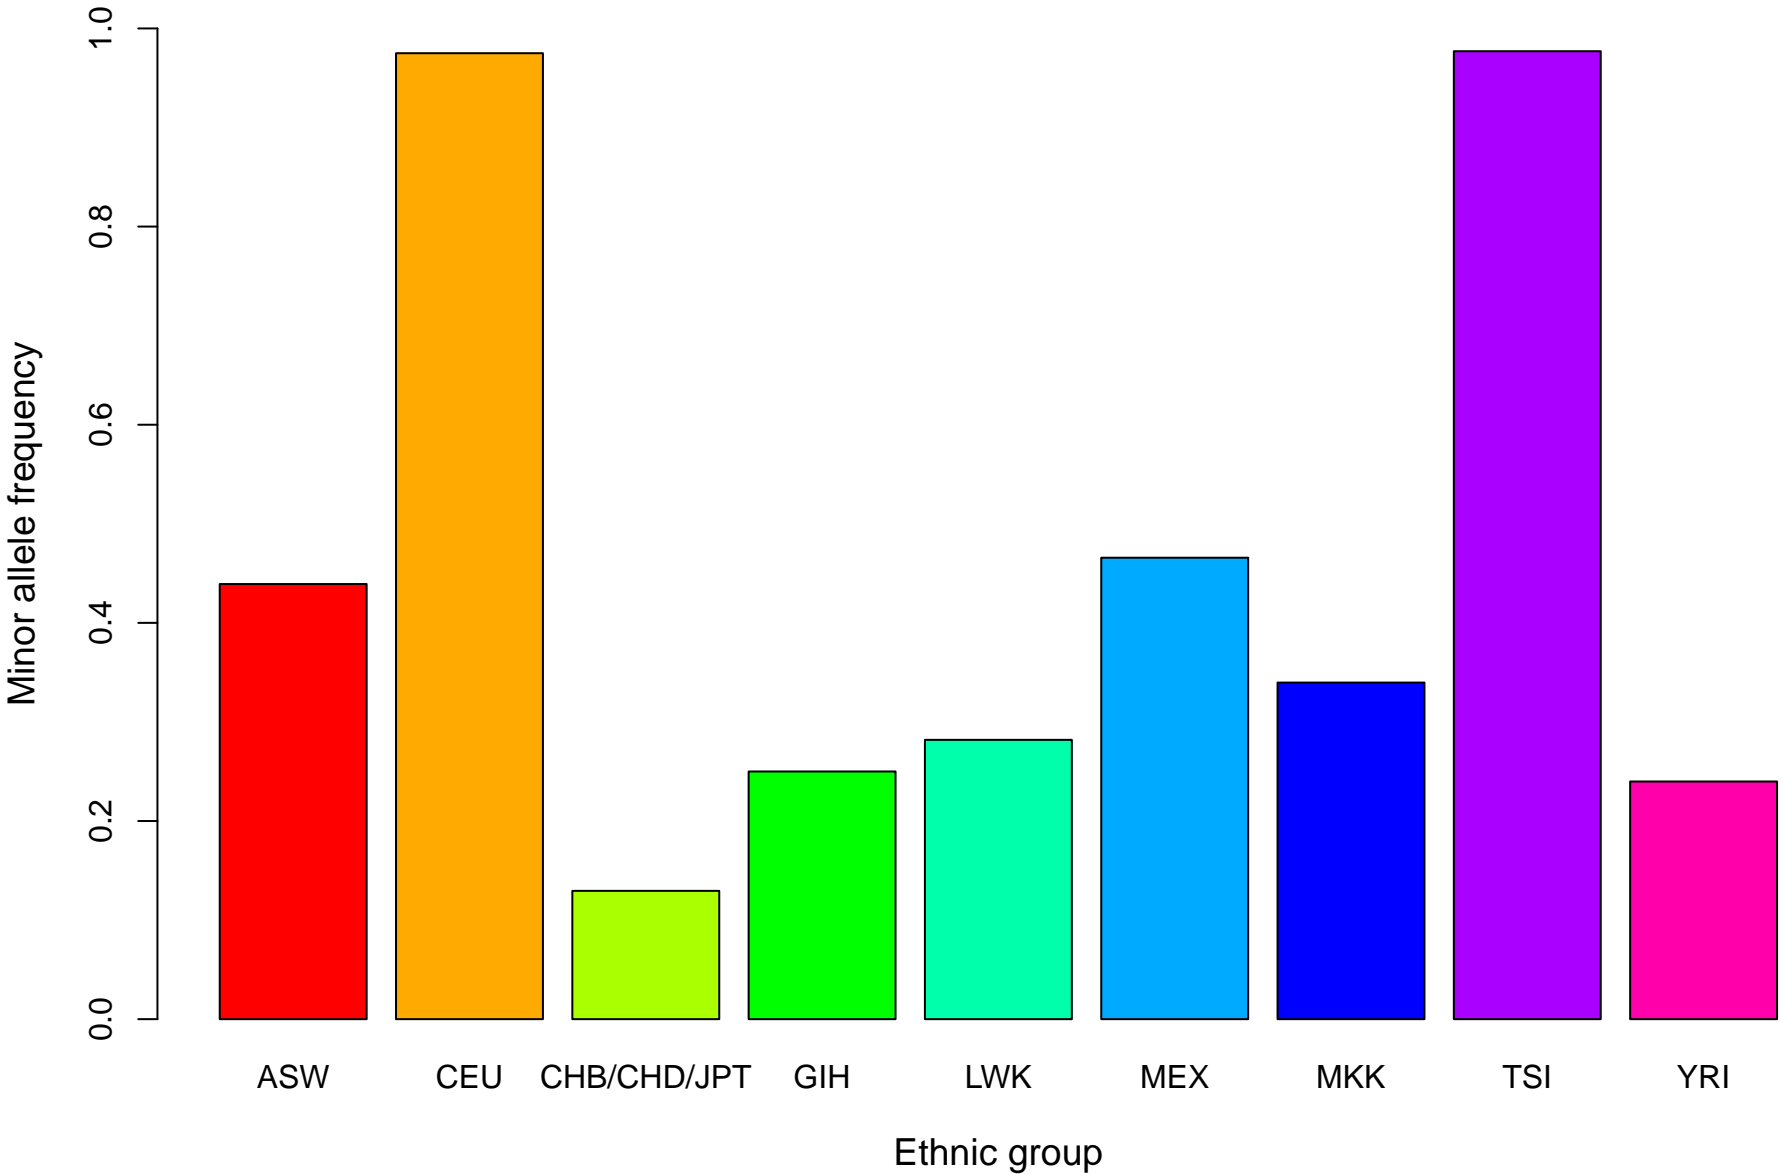

# rs17415172\_A

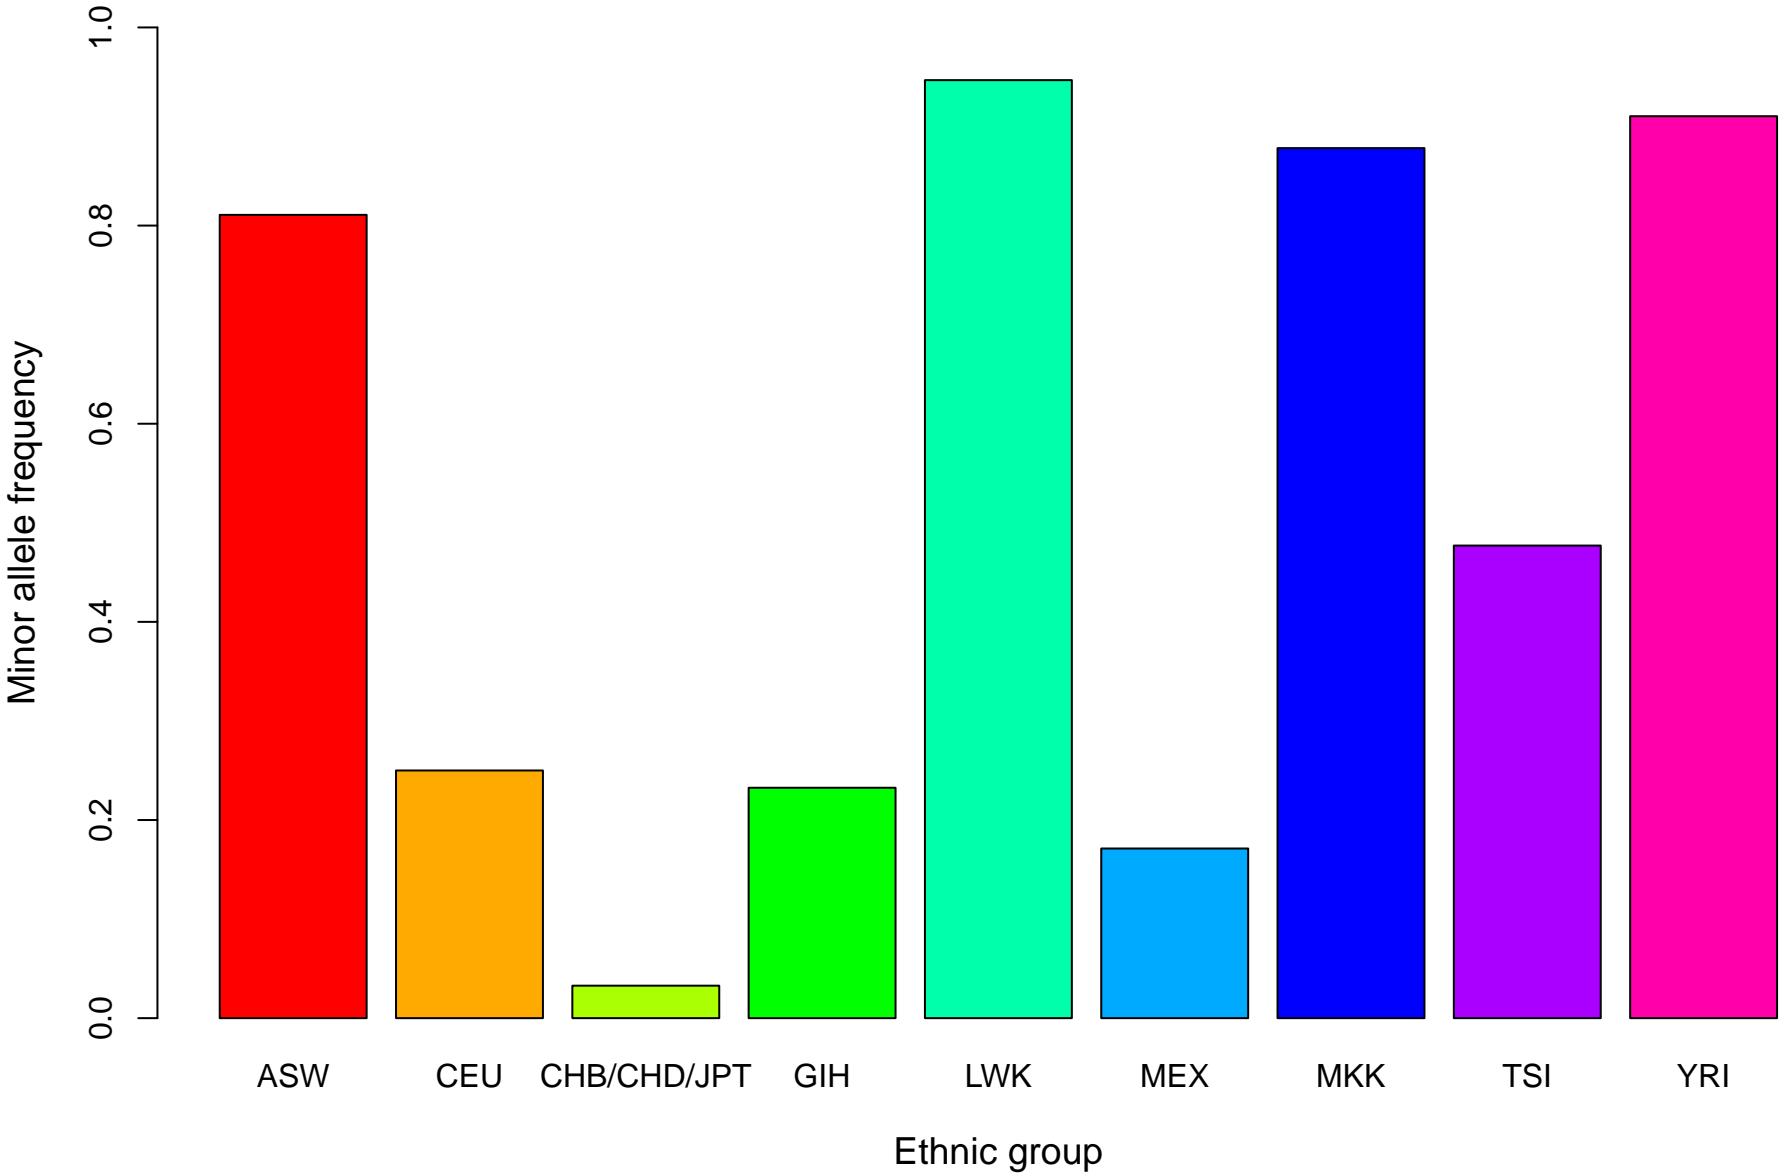

# rs6756739\_T

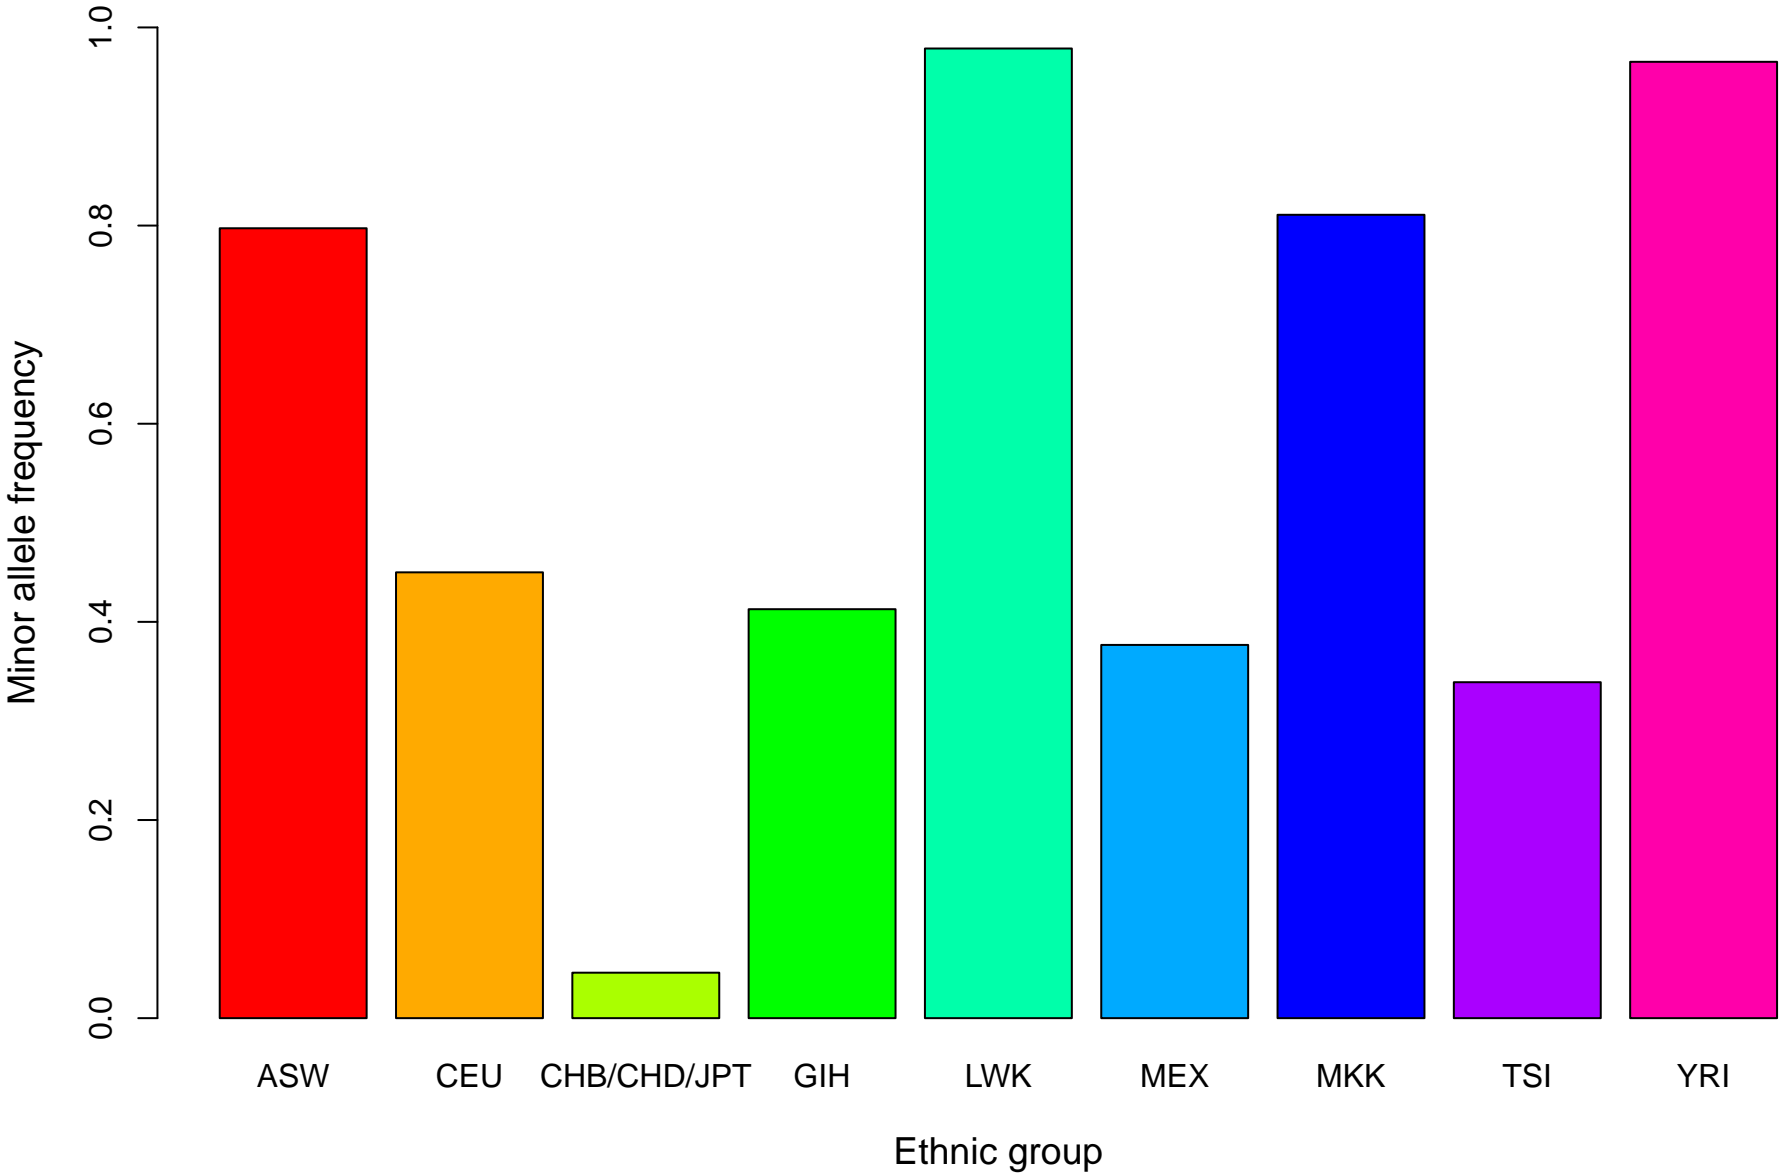

# rs2416791\_A

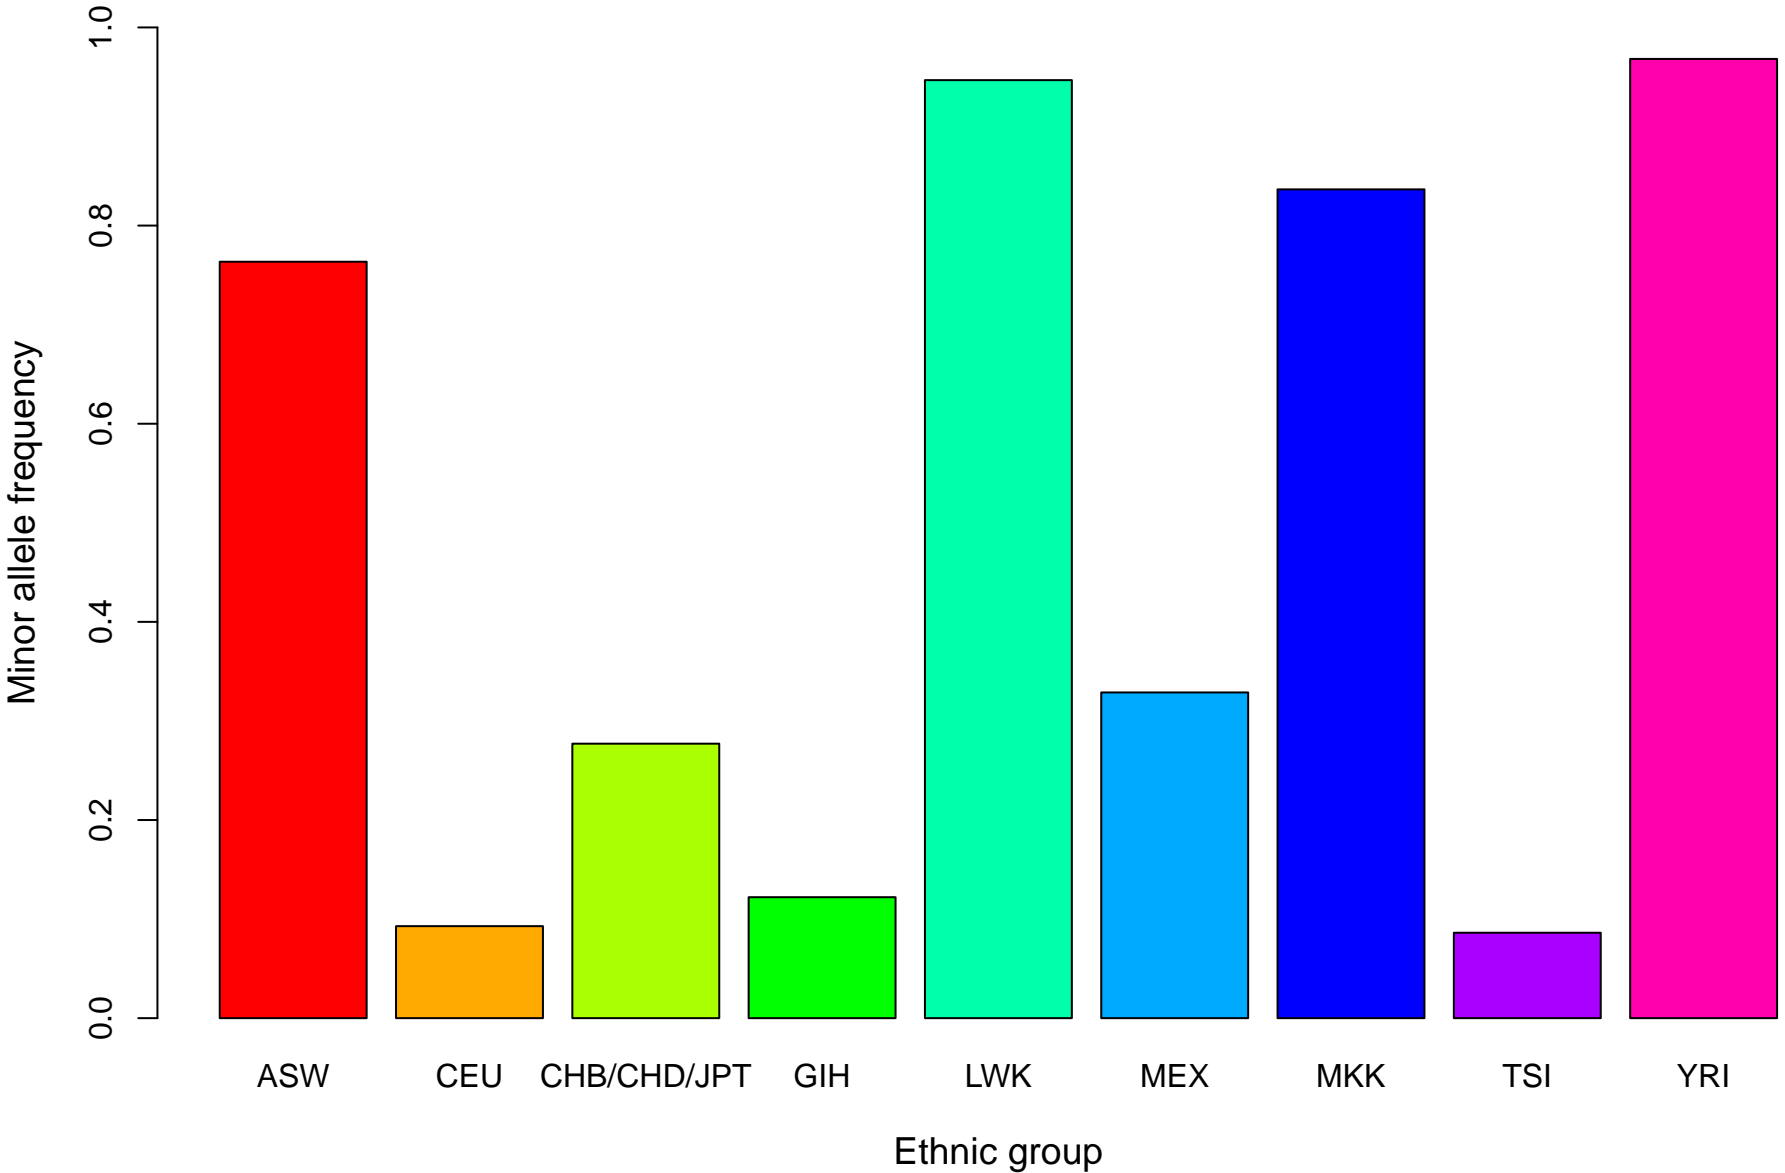

# rs4958359\_C

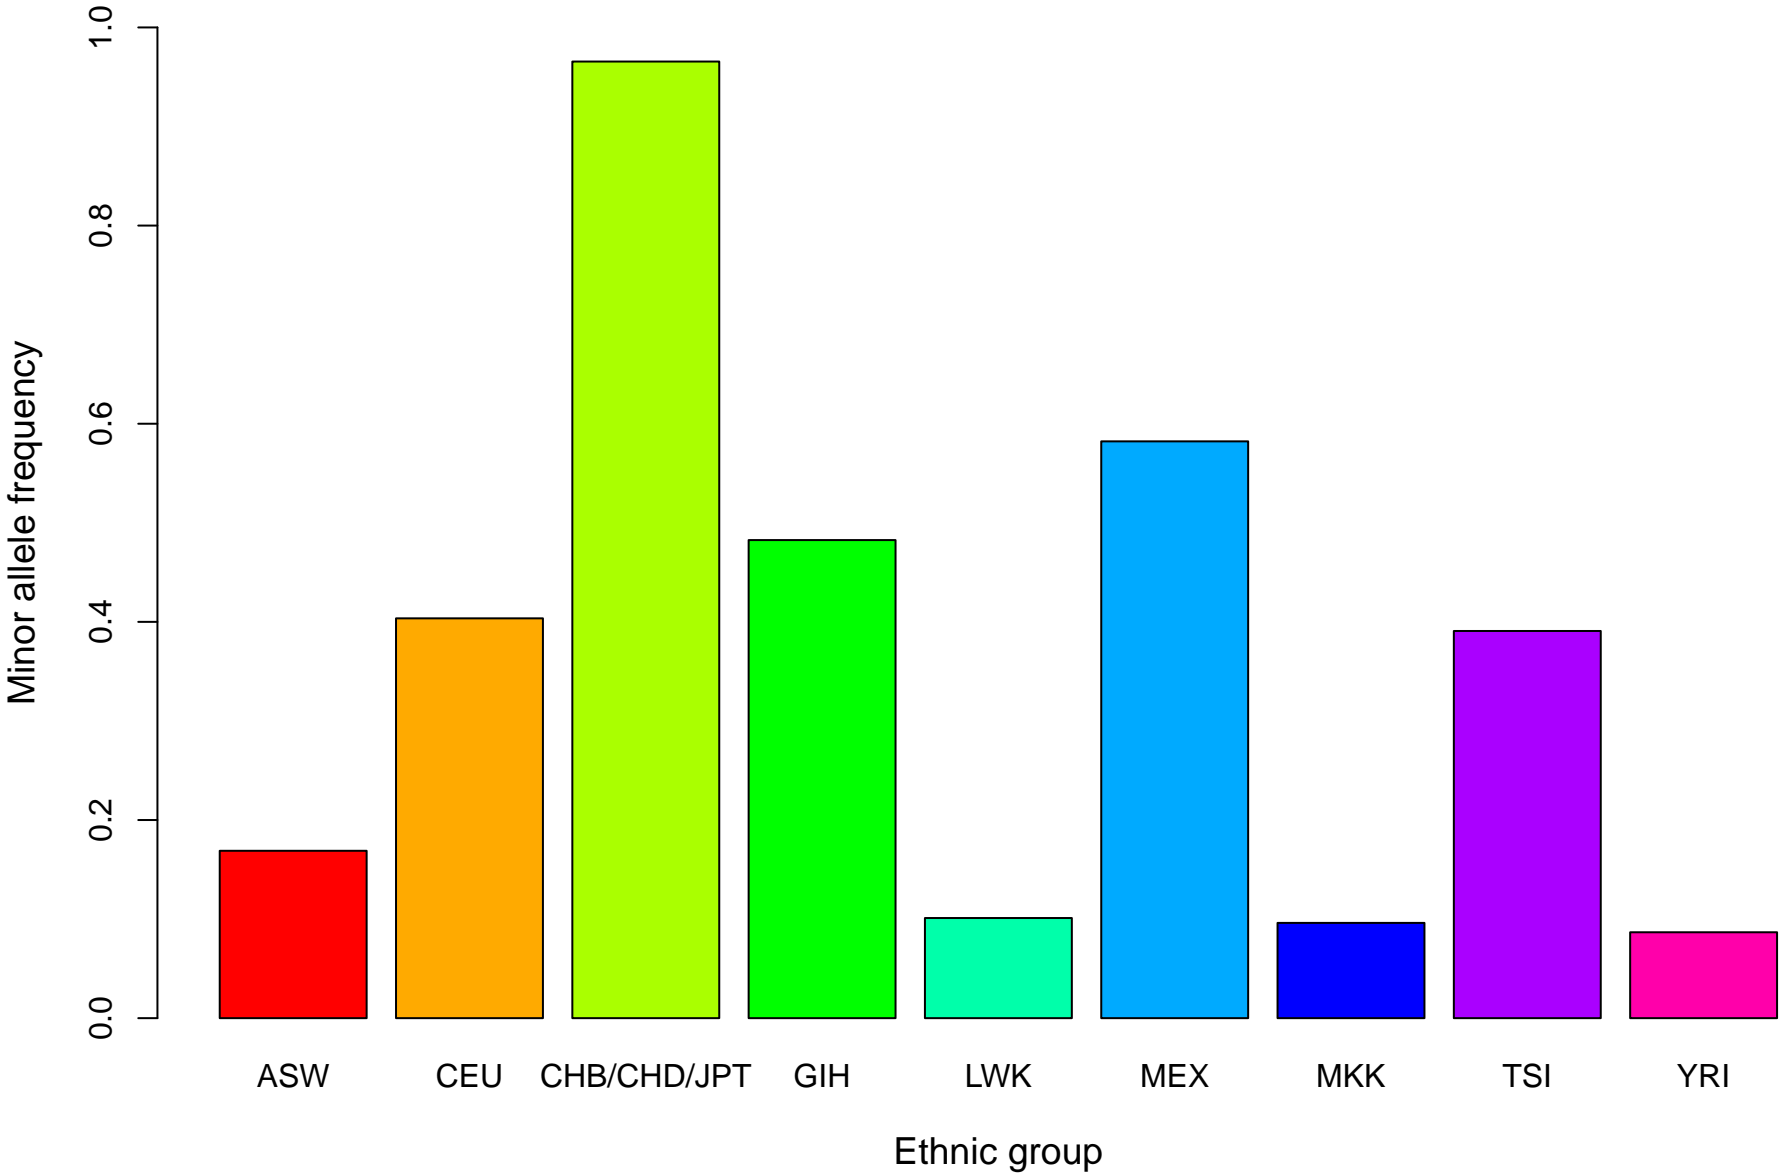

# rs7712091\_T

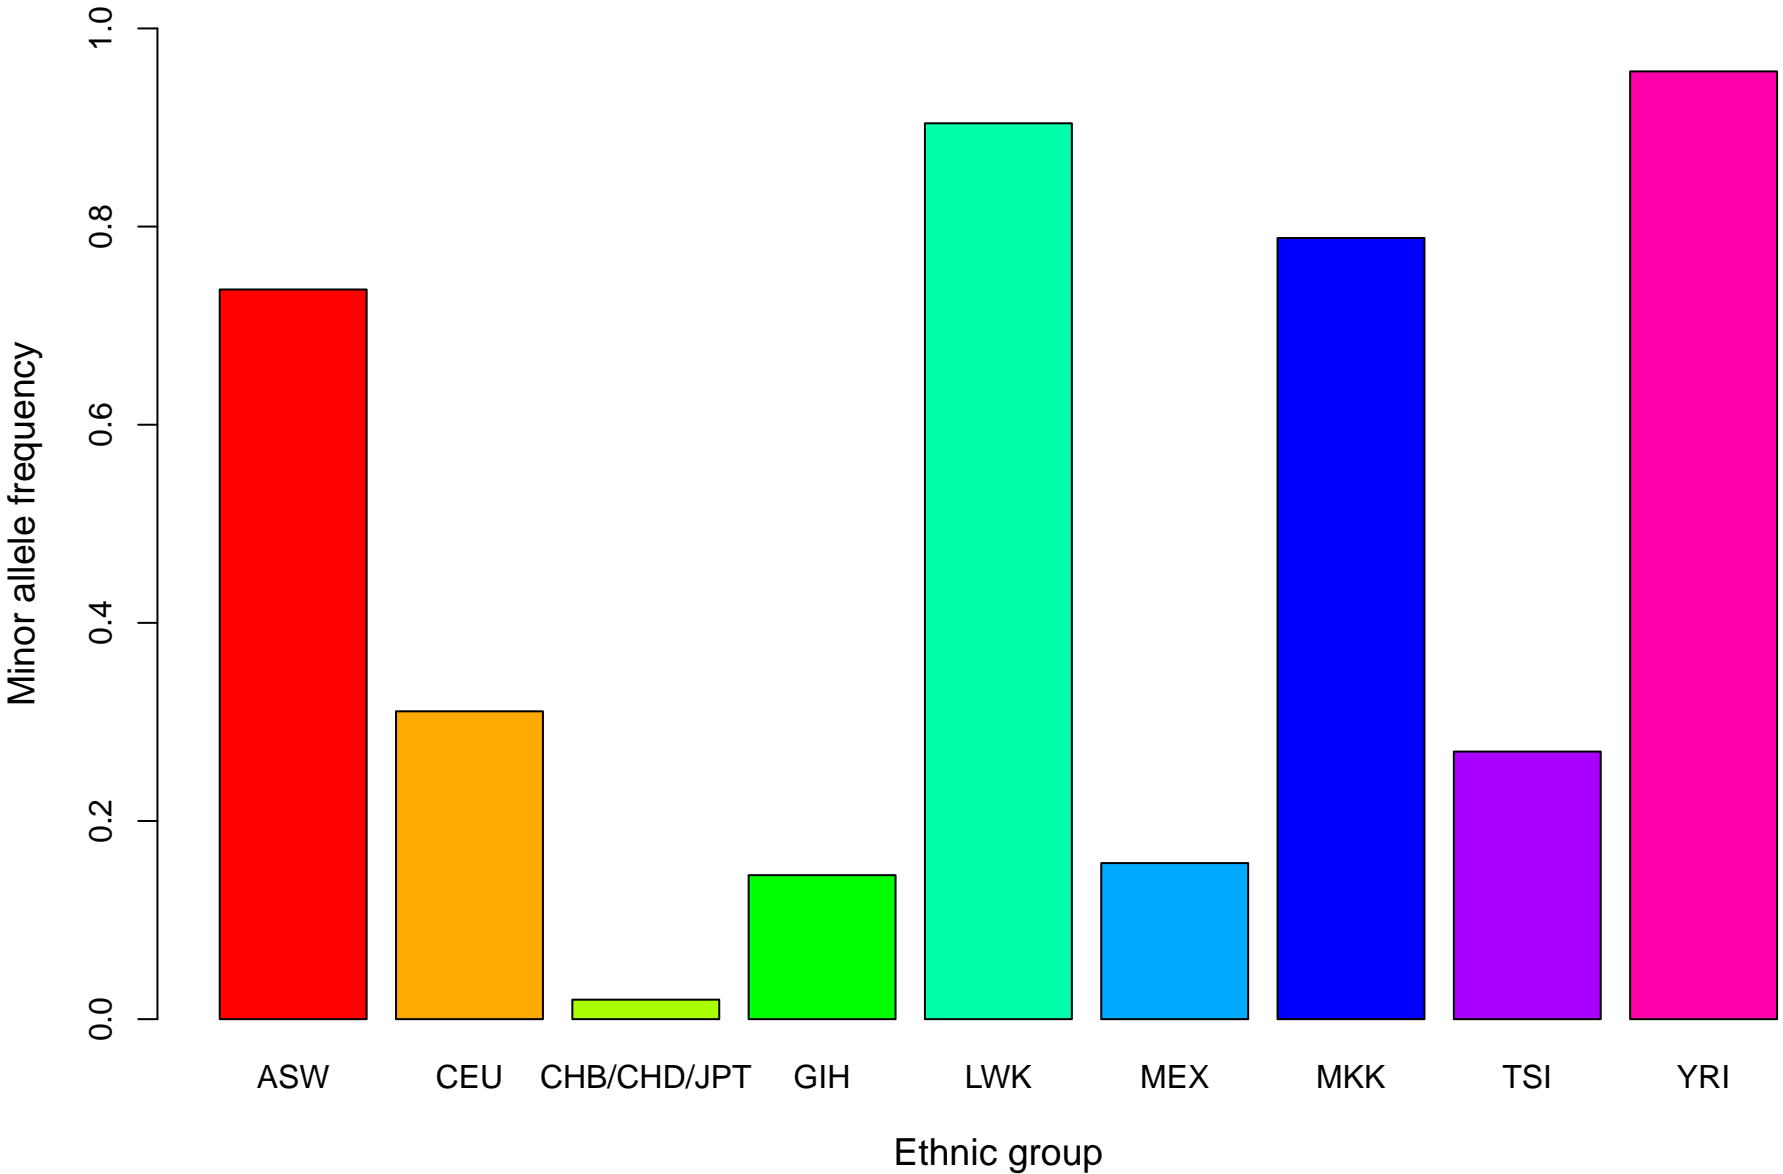



# rs6539869\_G

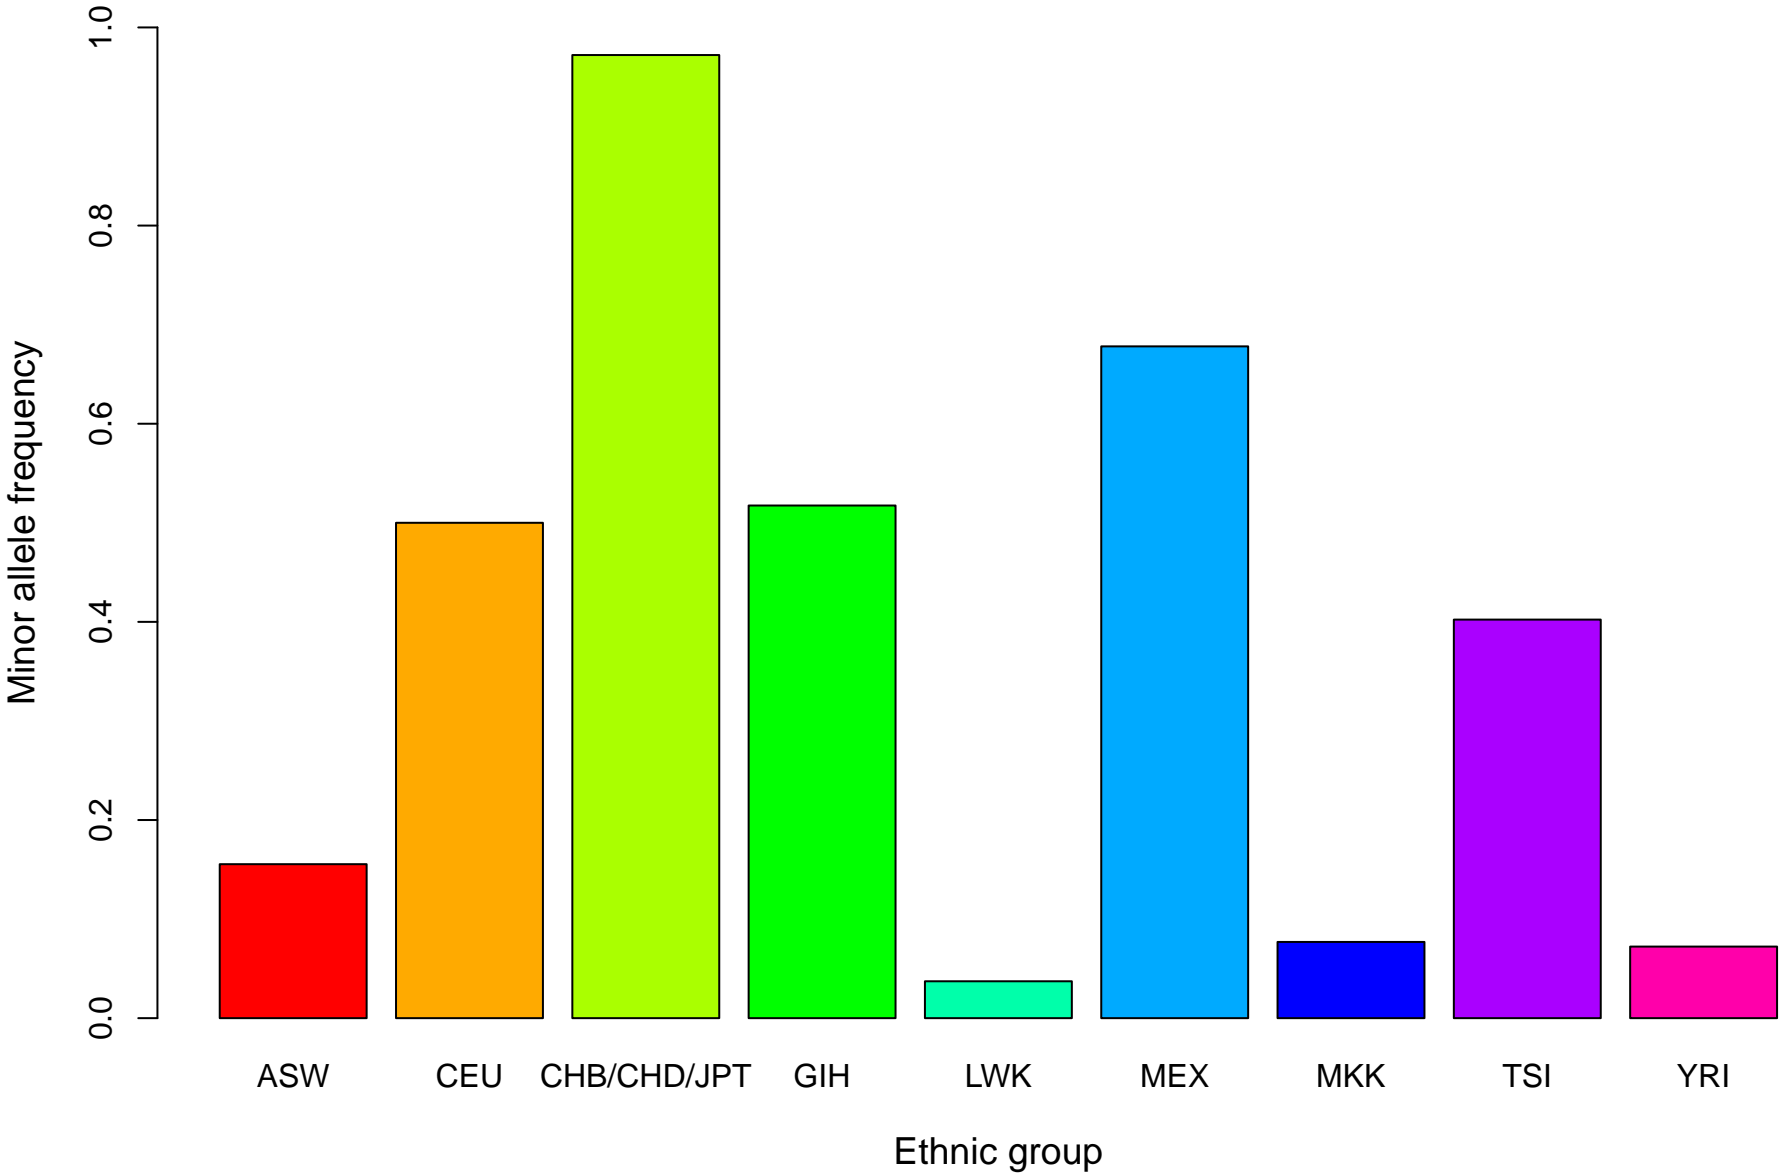

# rs2868756\_T

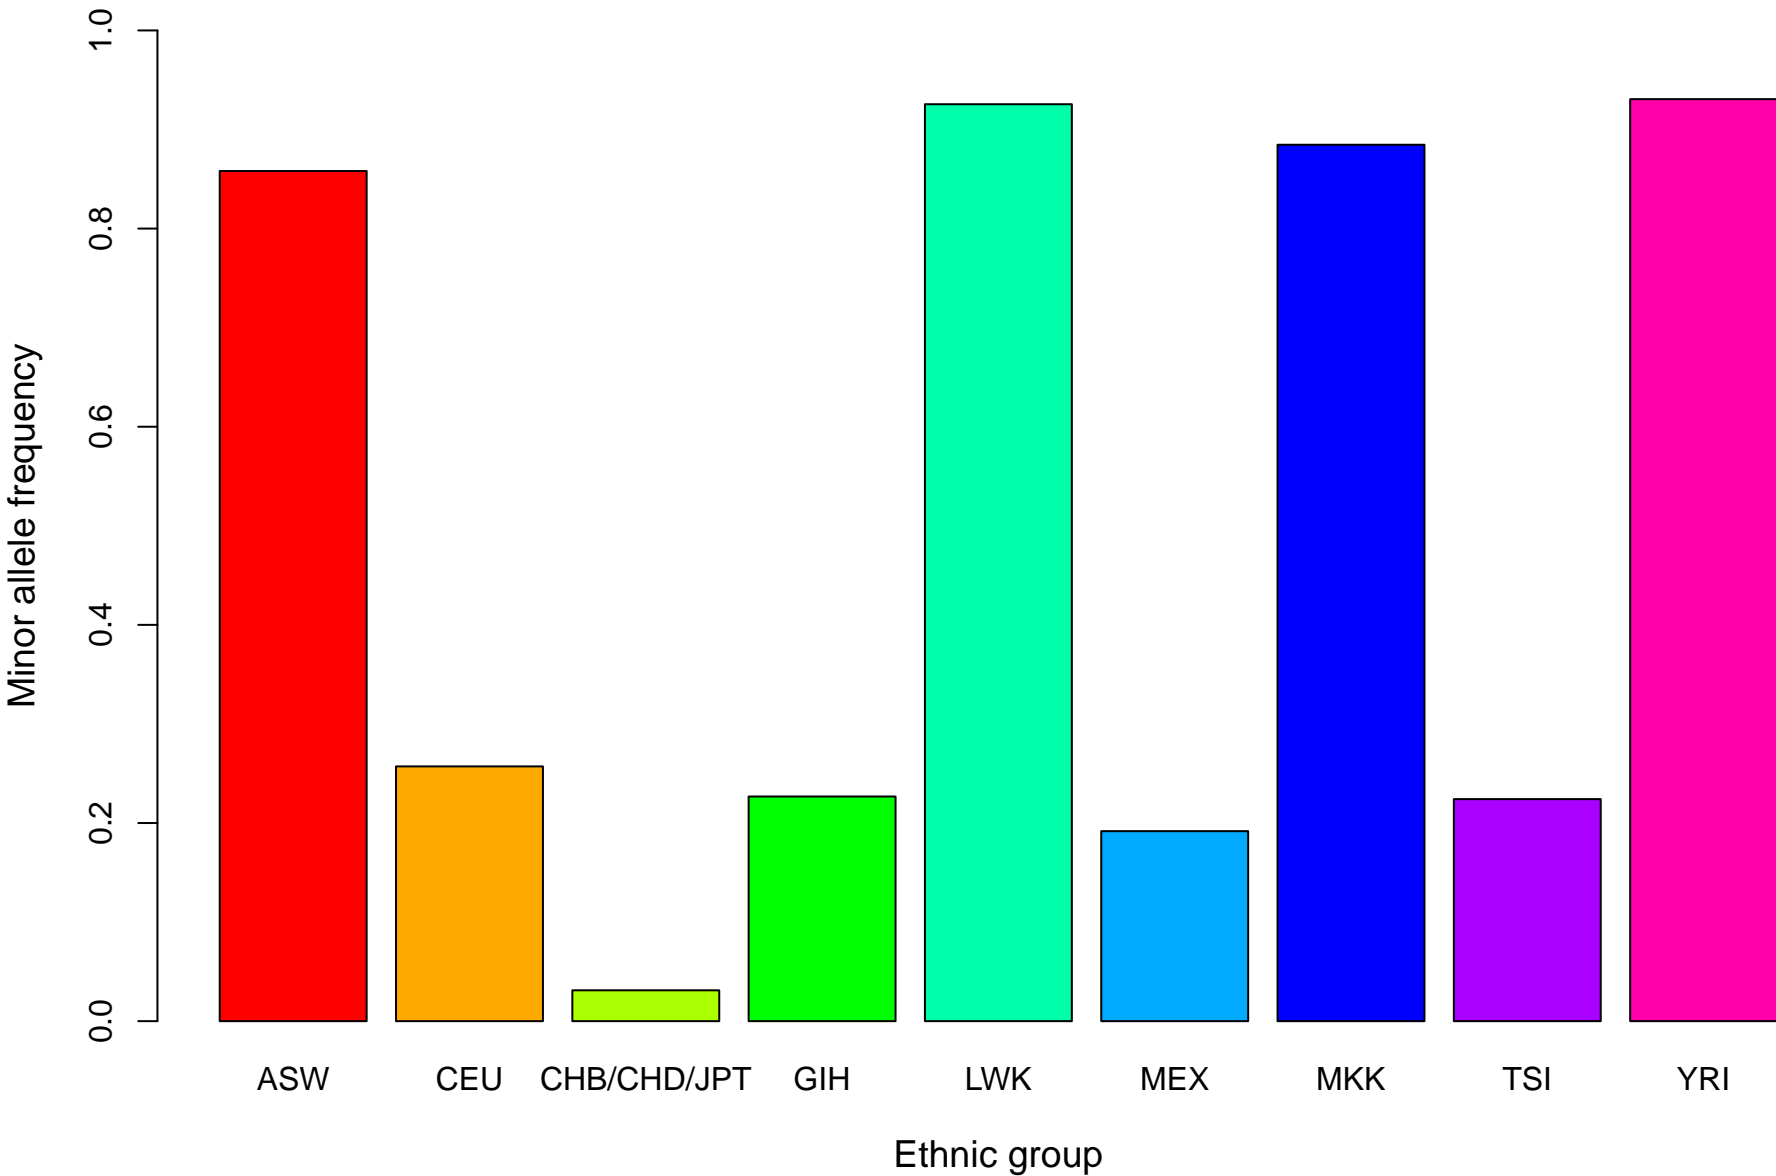

# rs6007862\_A

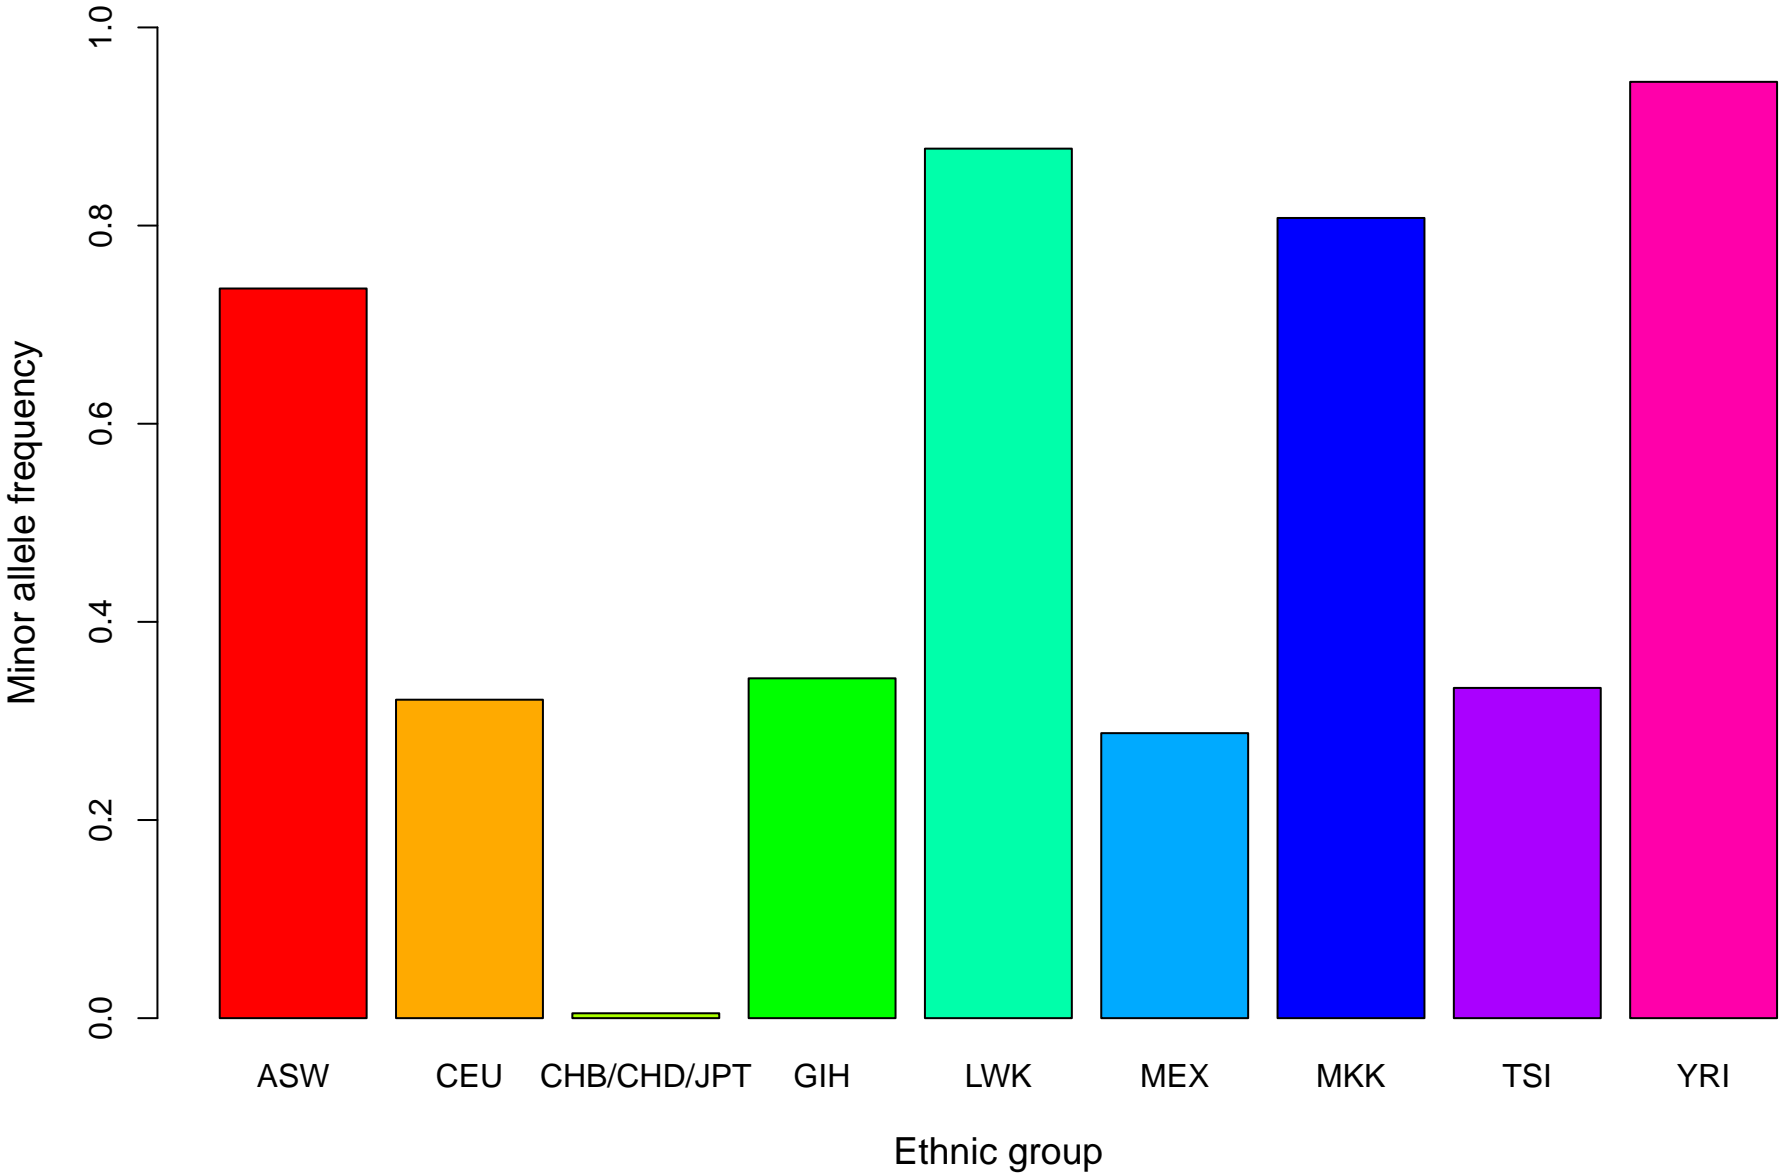

# rs853983\_A

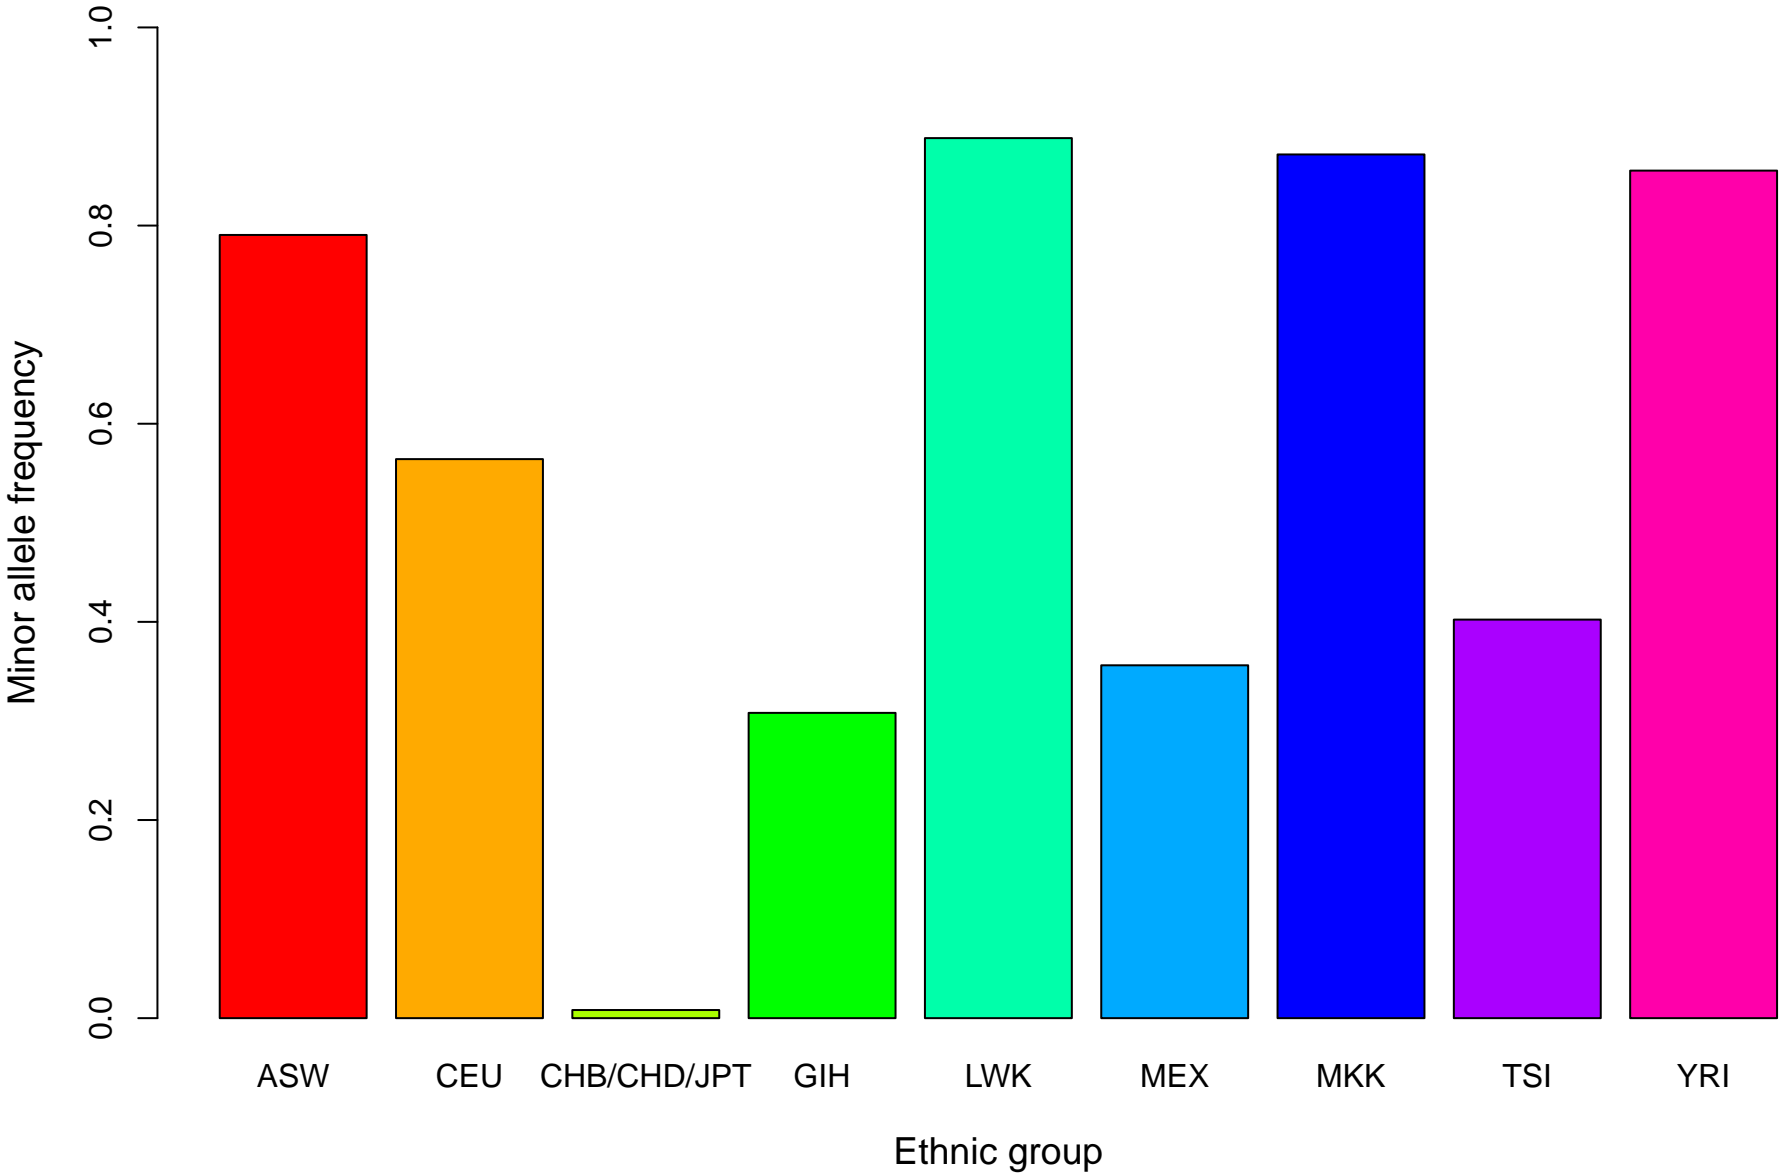

# rs8071654\_G

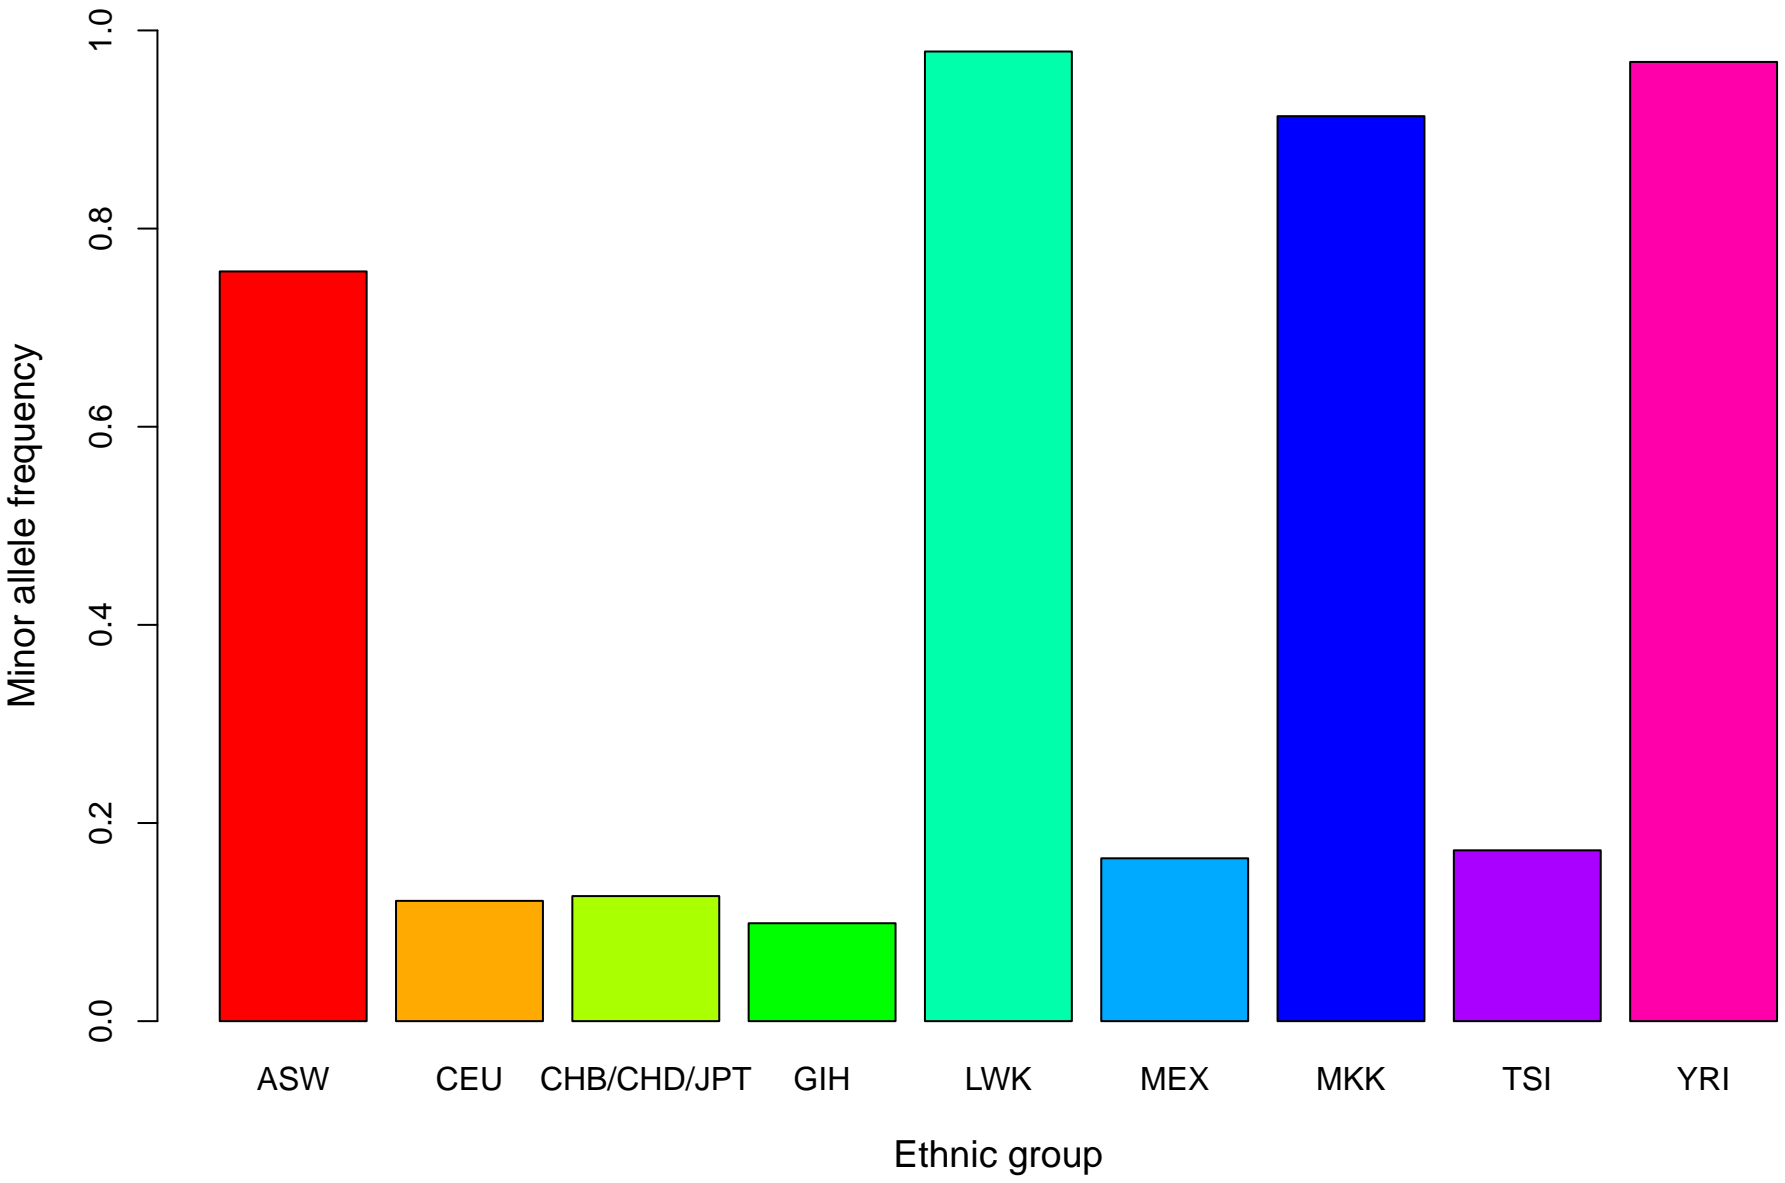

# rs834767\_G

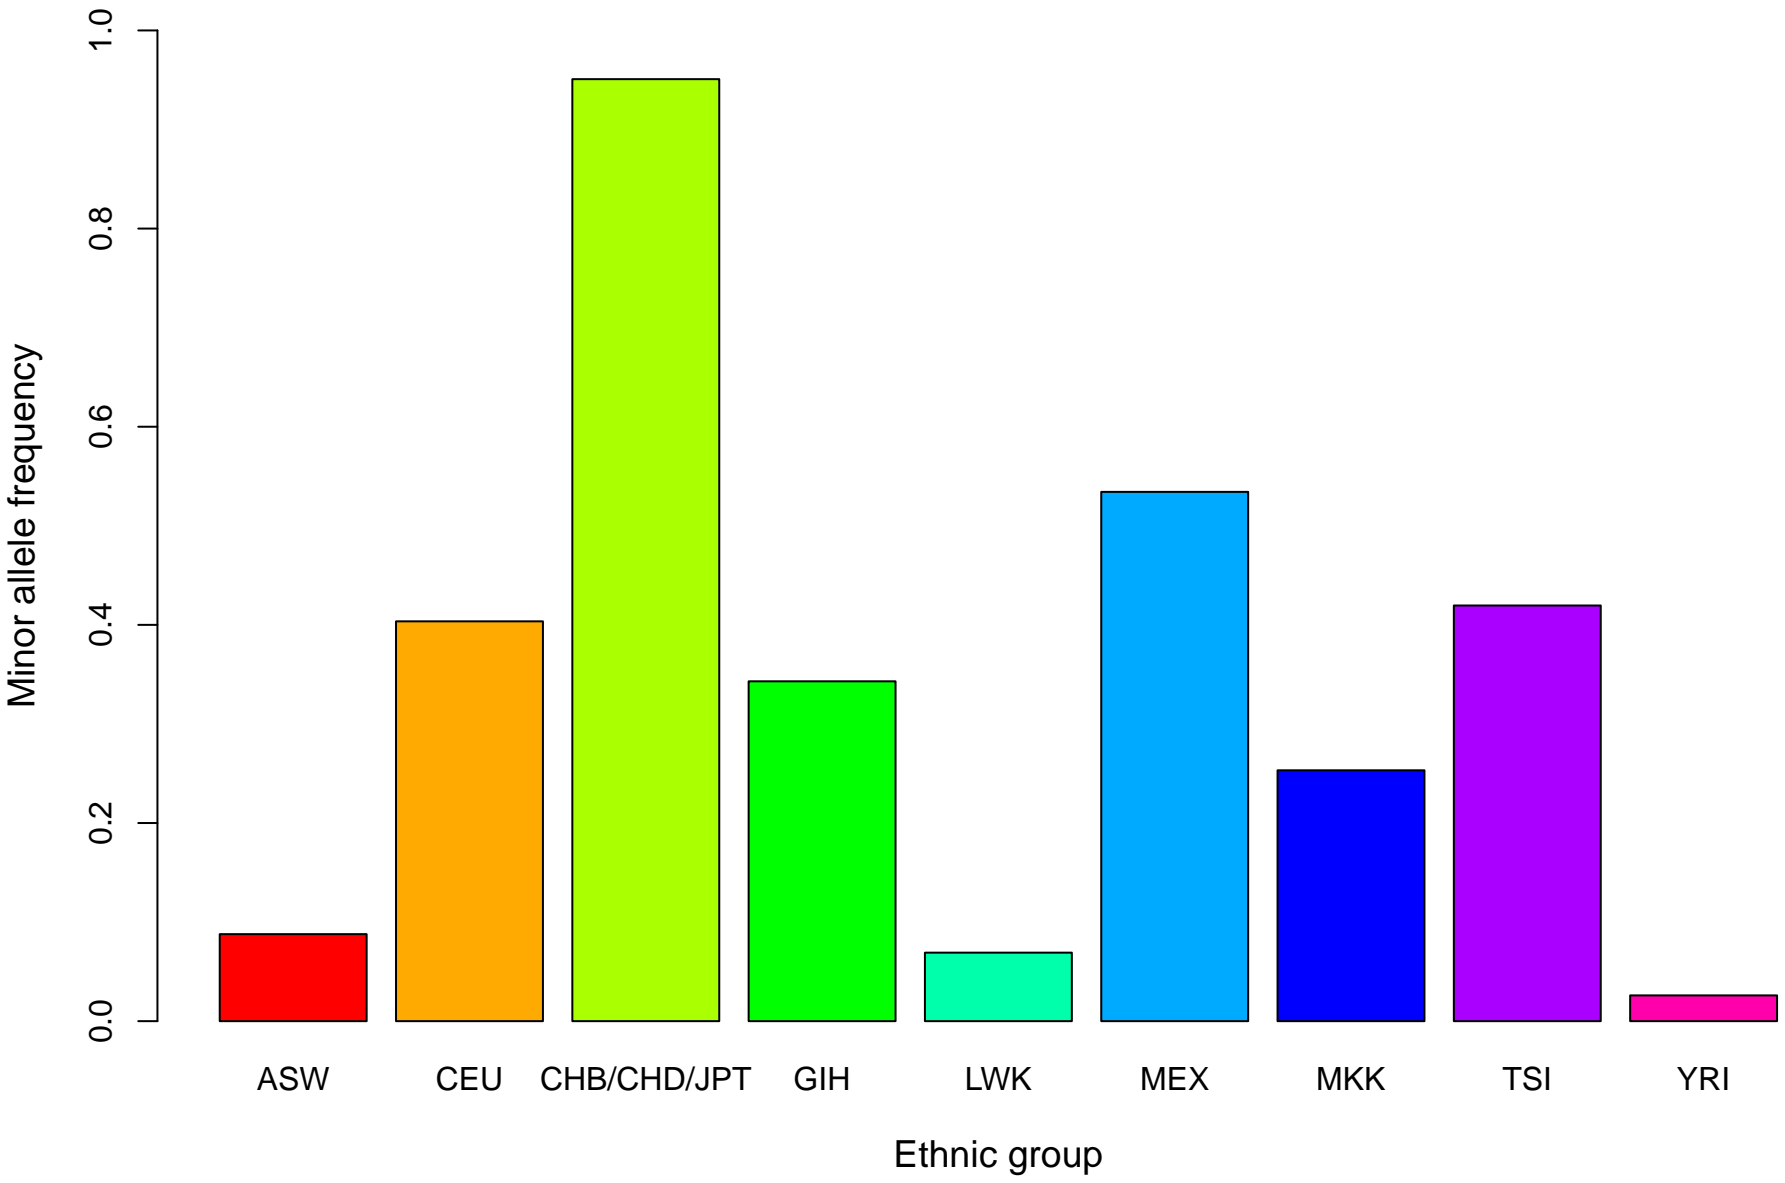

# rs3814134\_G

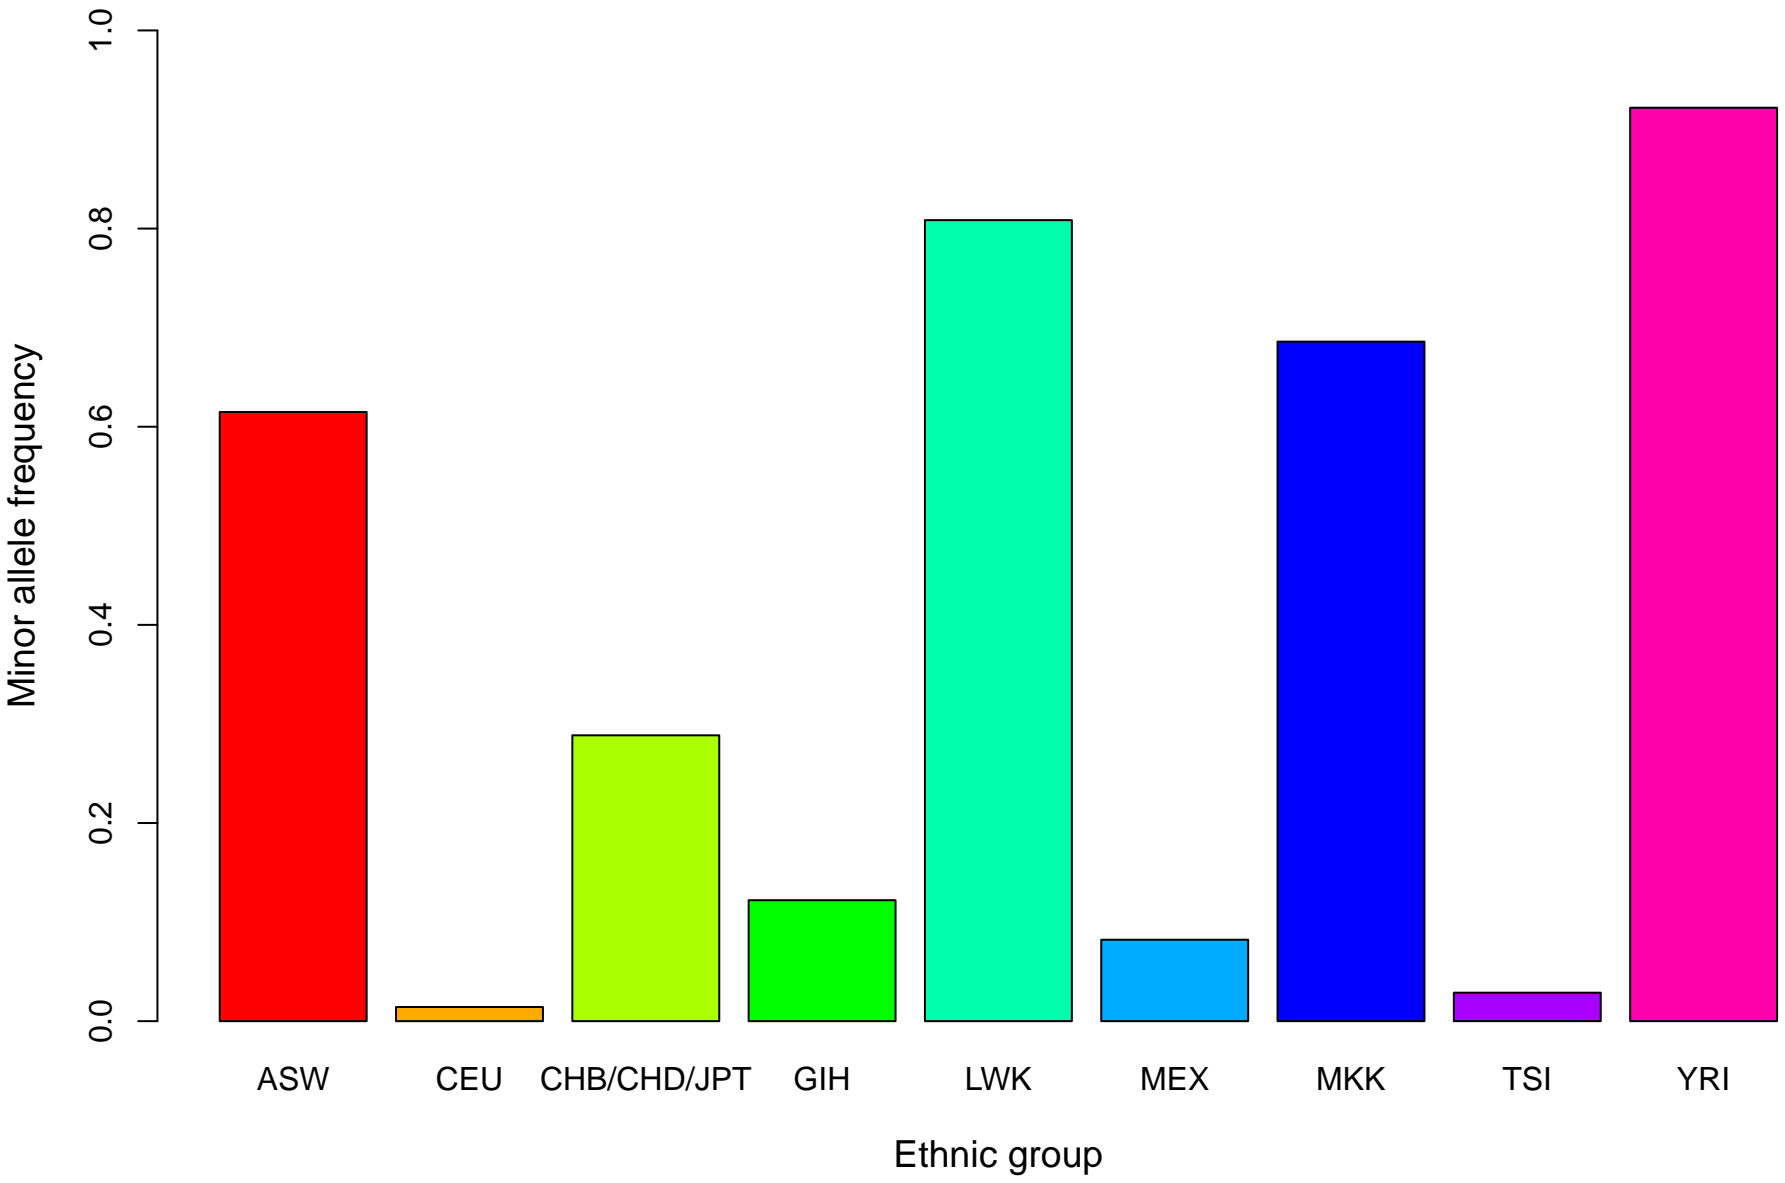

# rs11150599\_C

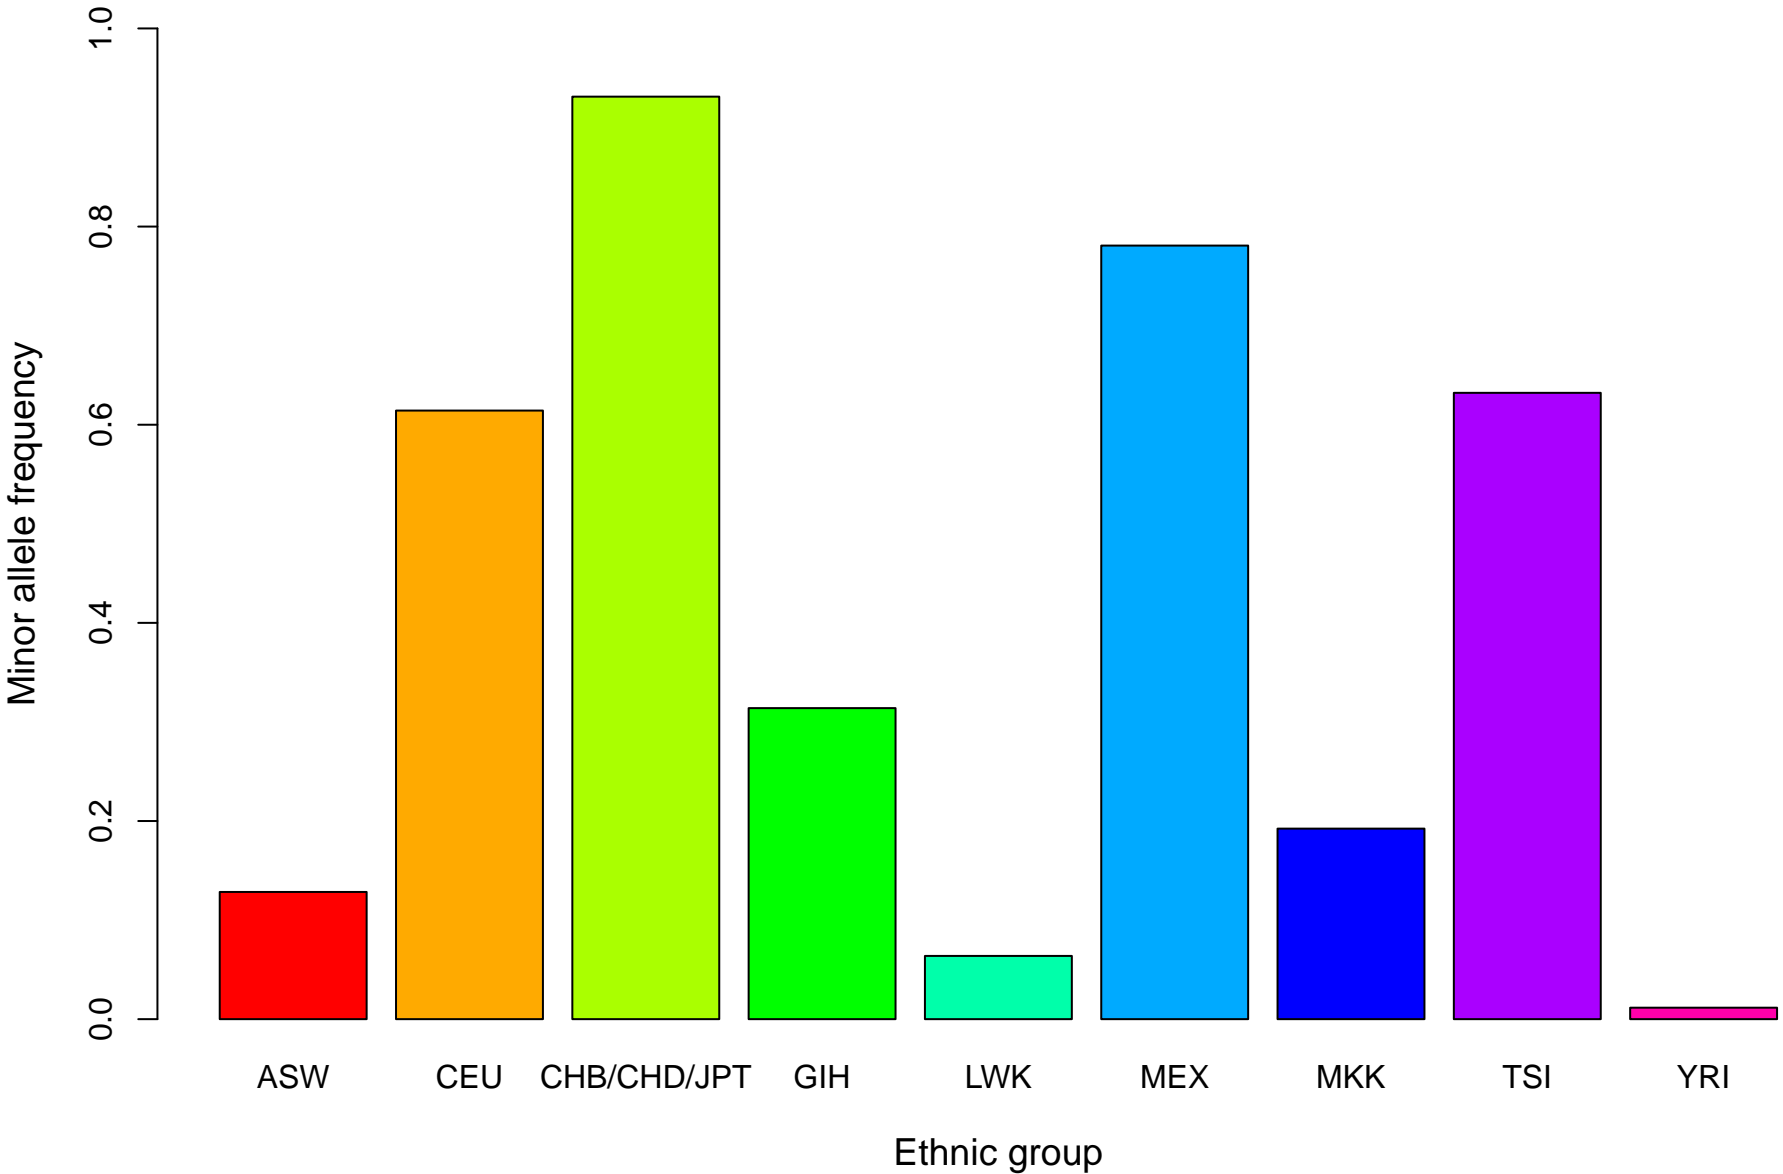



# rs2896733\_T

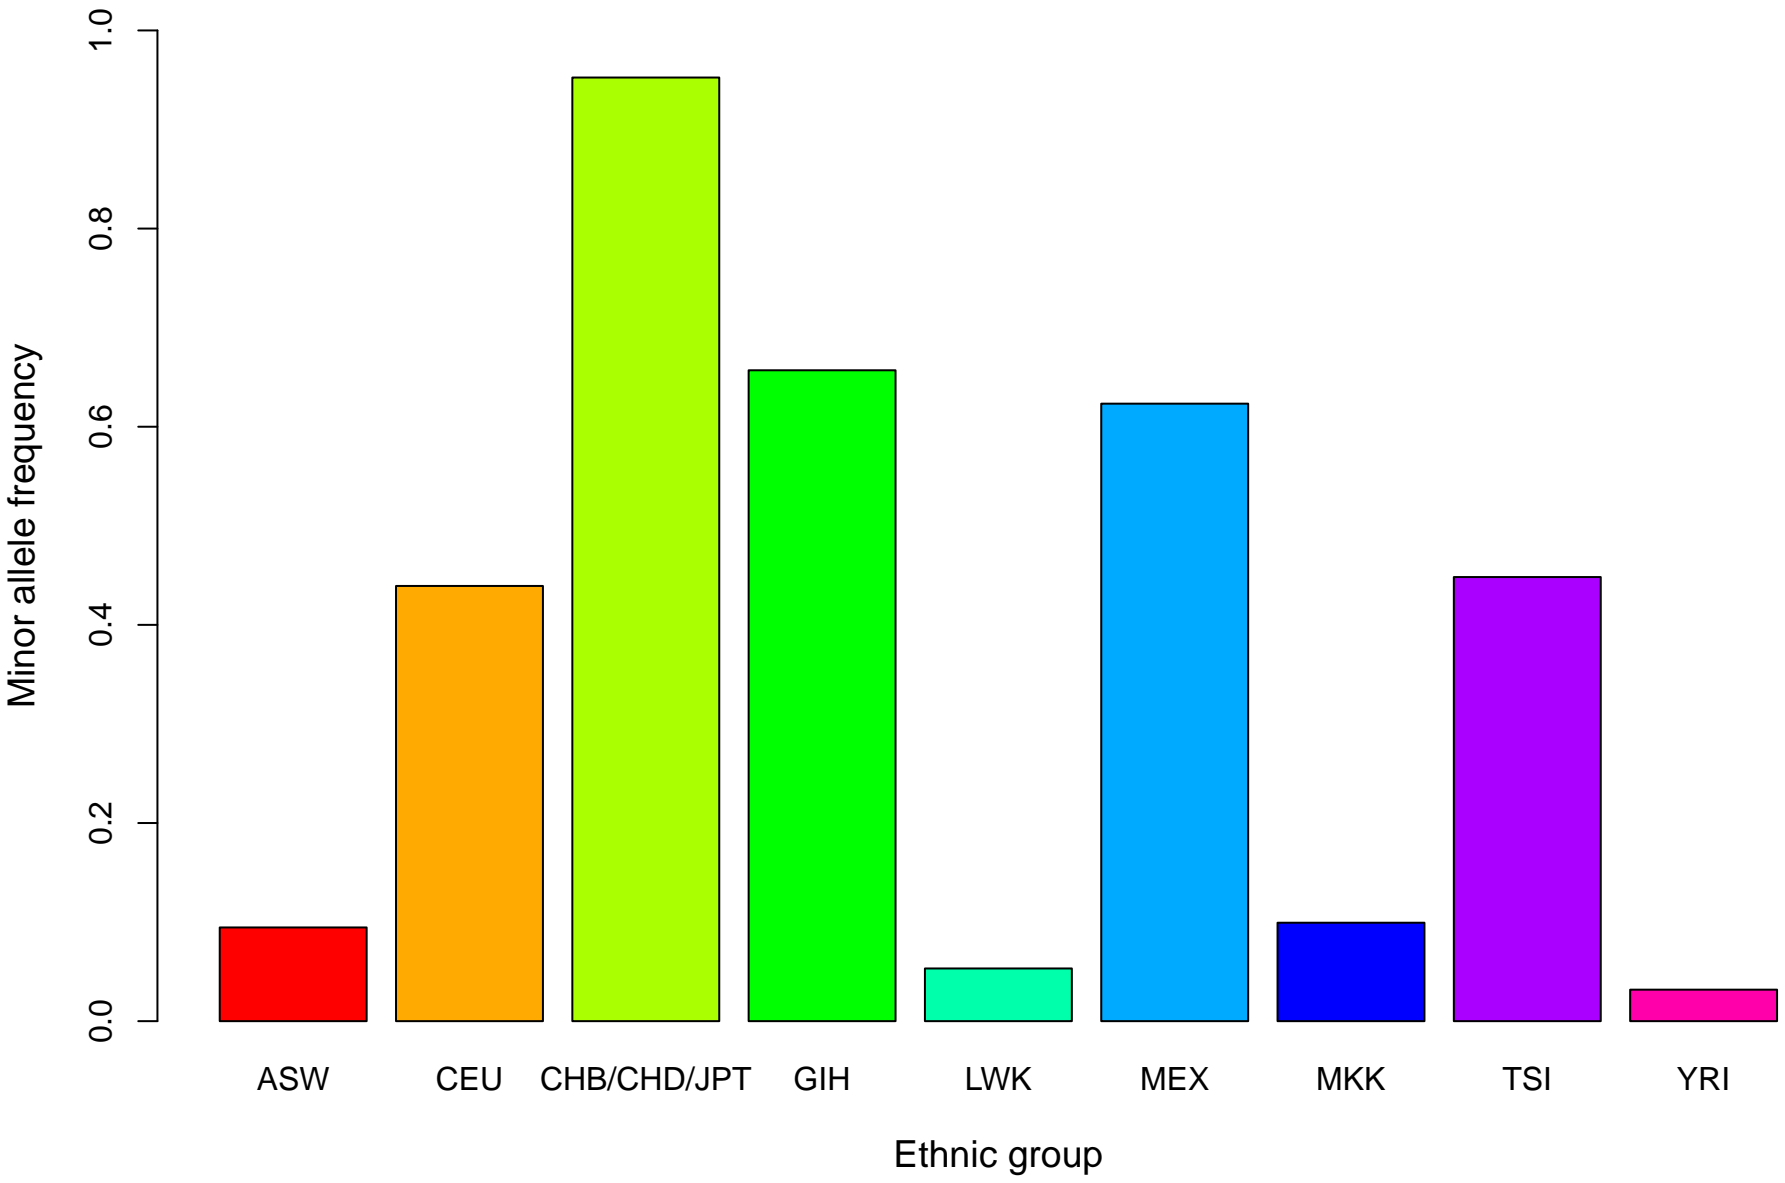

# rs4623048\_T

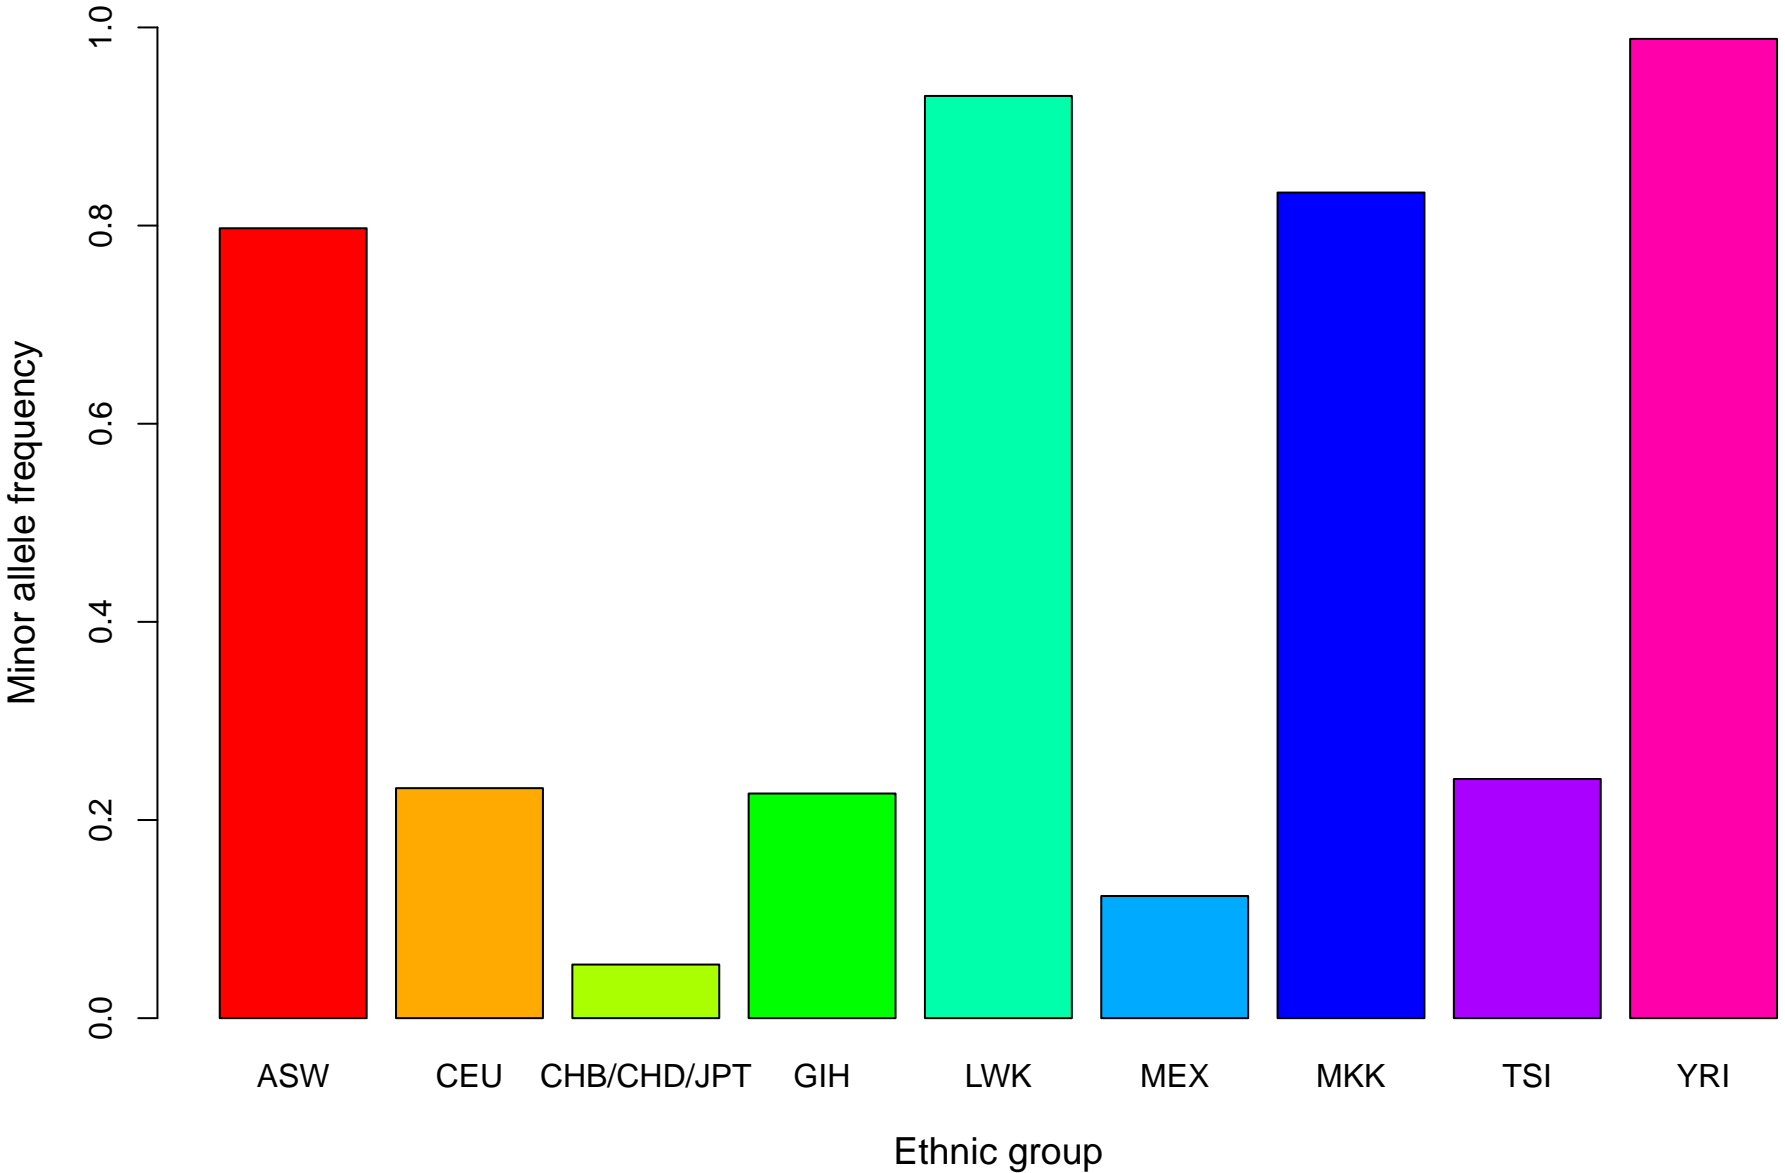

# rs10786887\_A

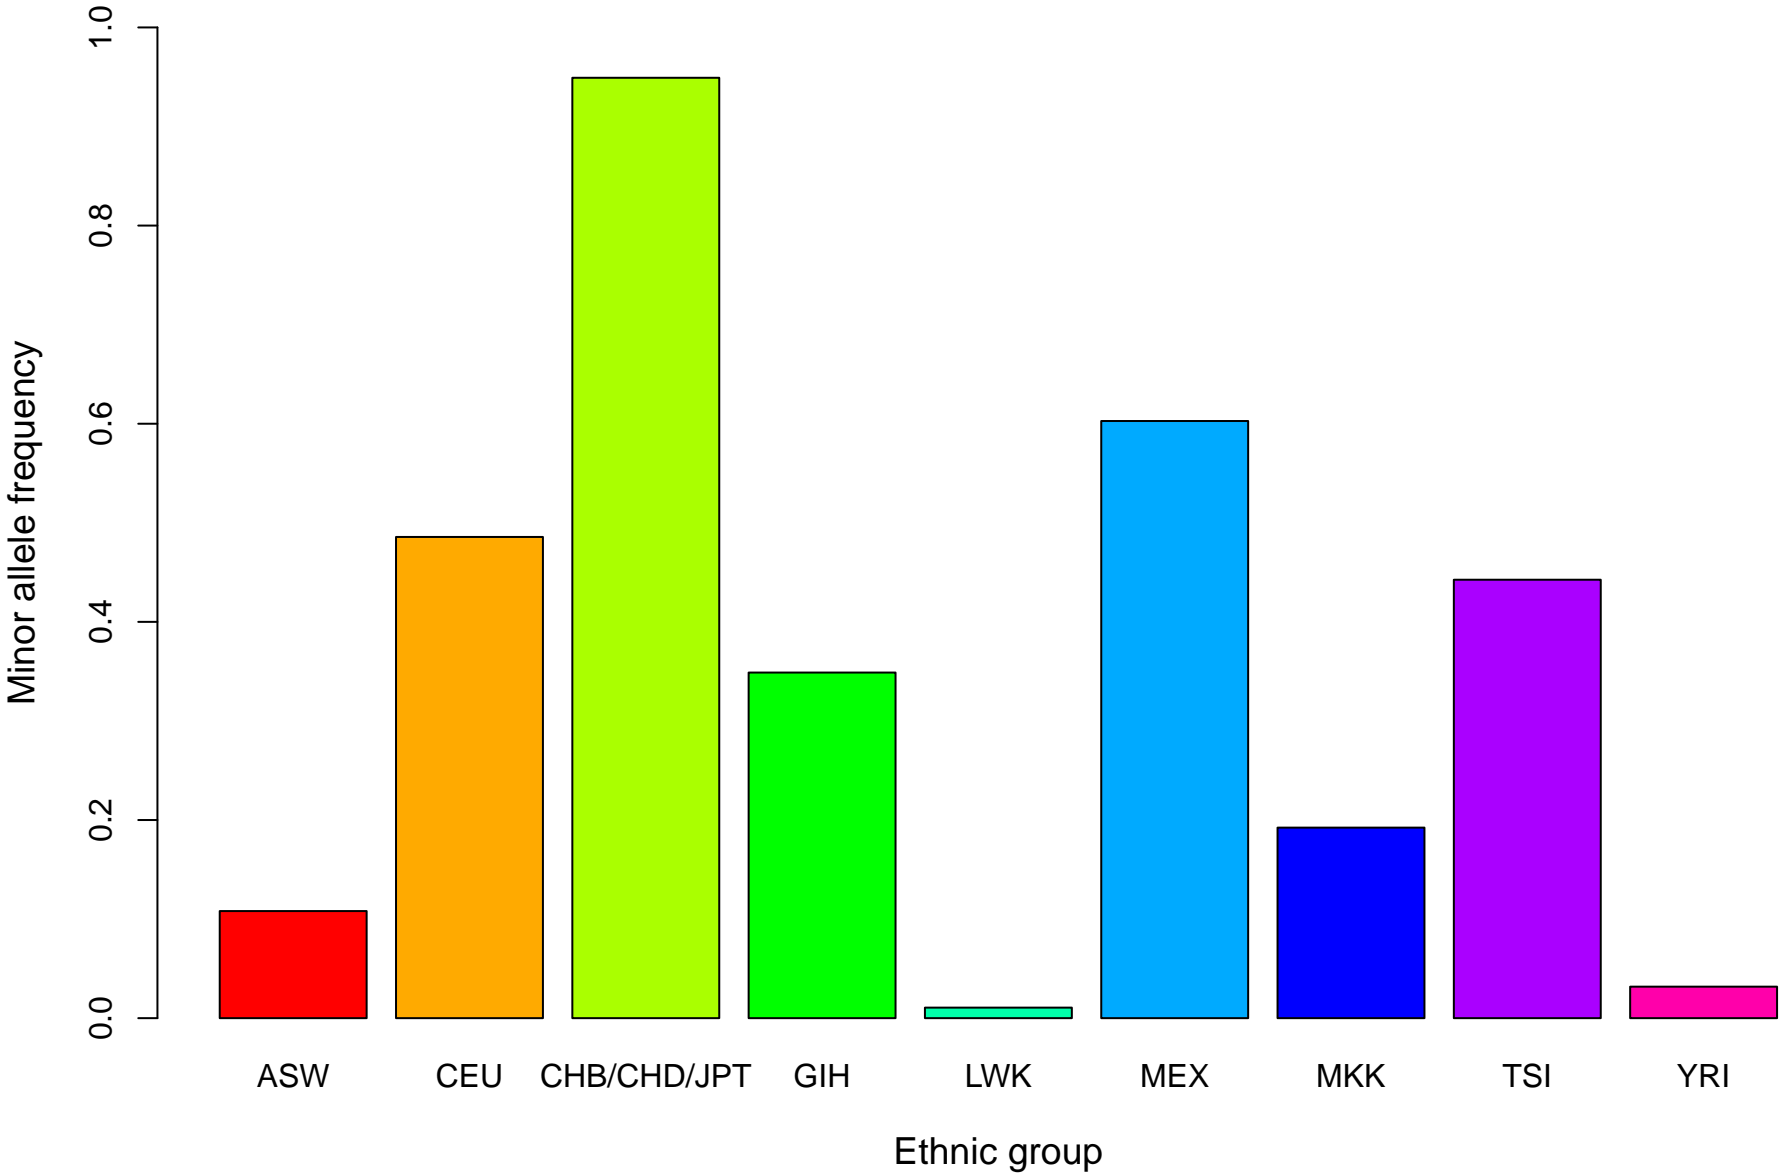

# rs7103088\_A

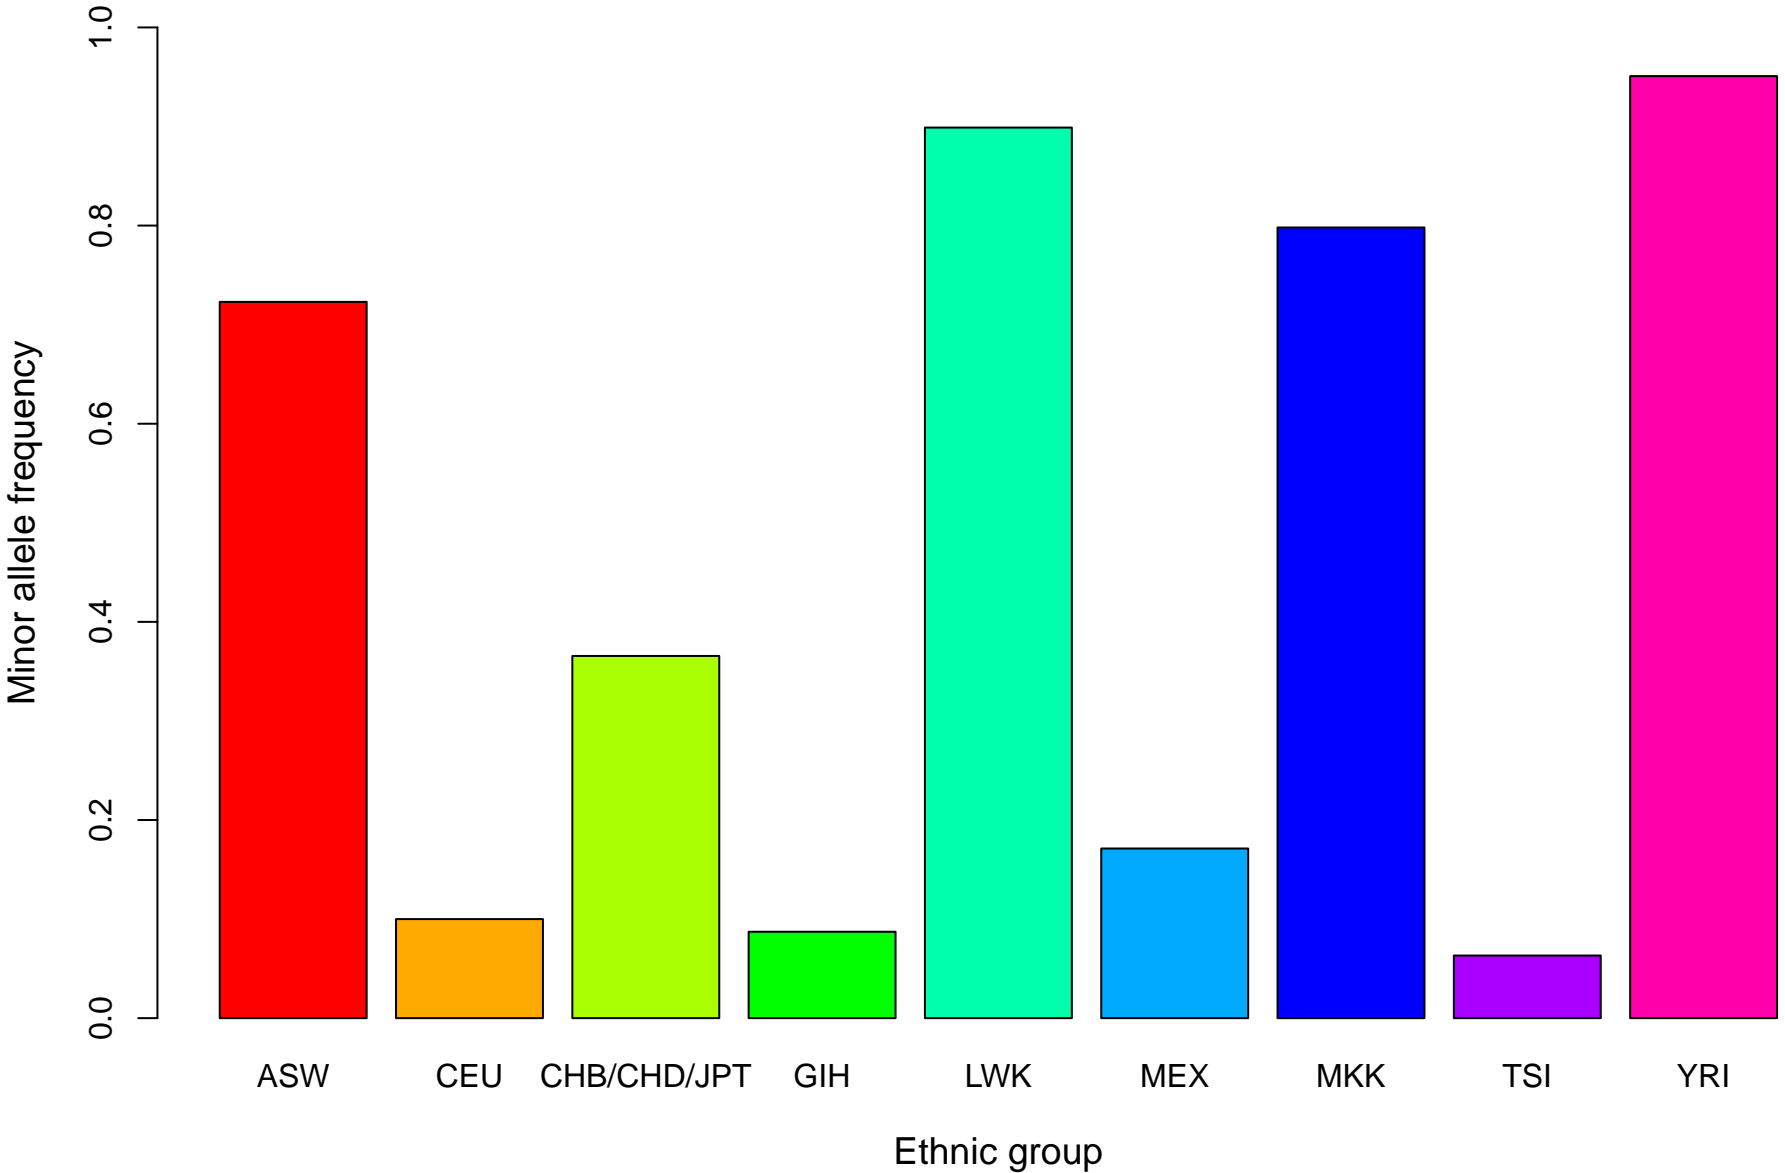

# rs3997520\_G

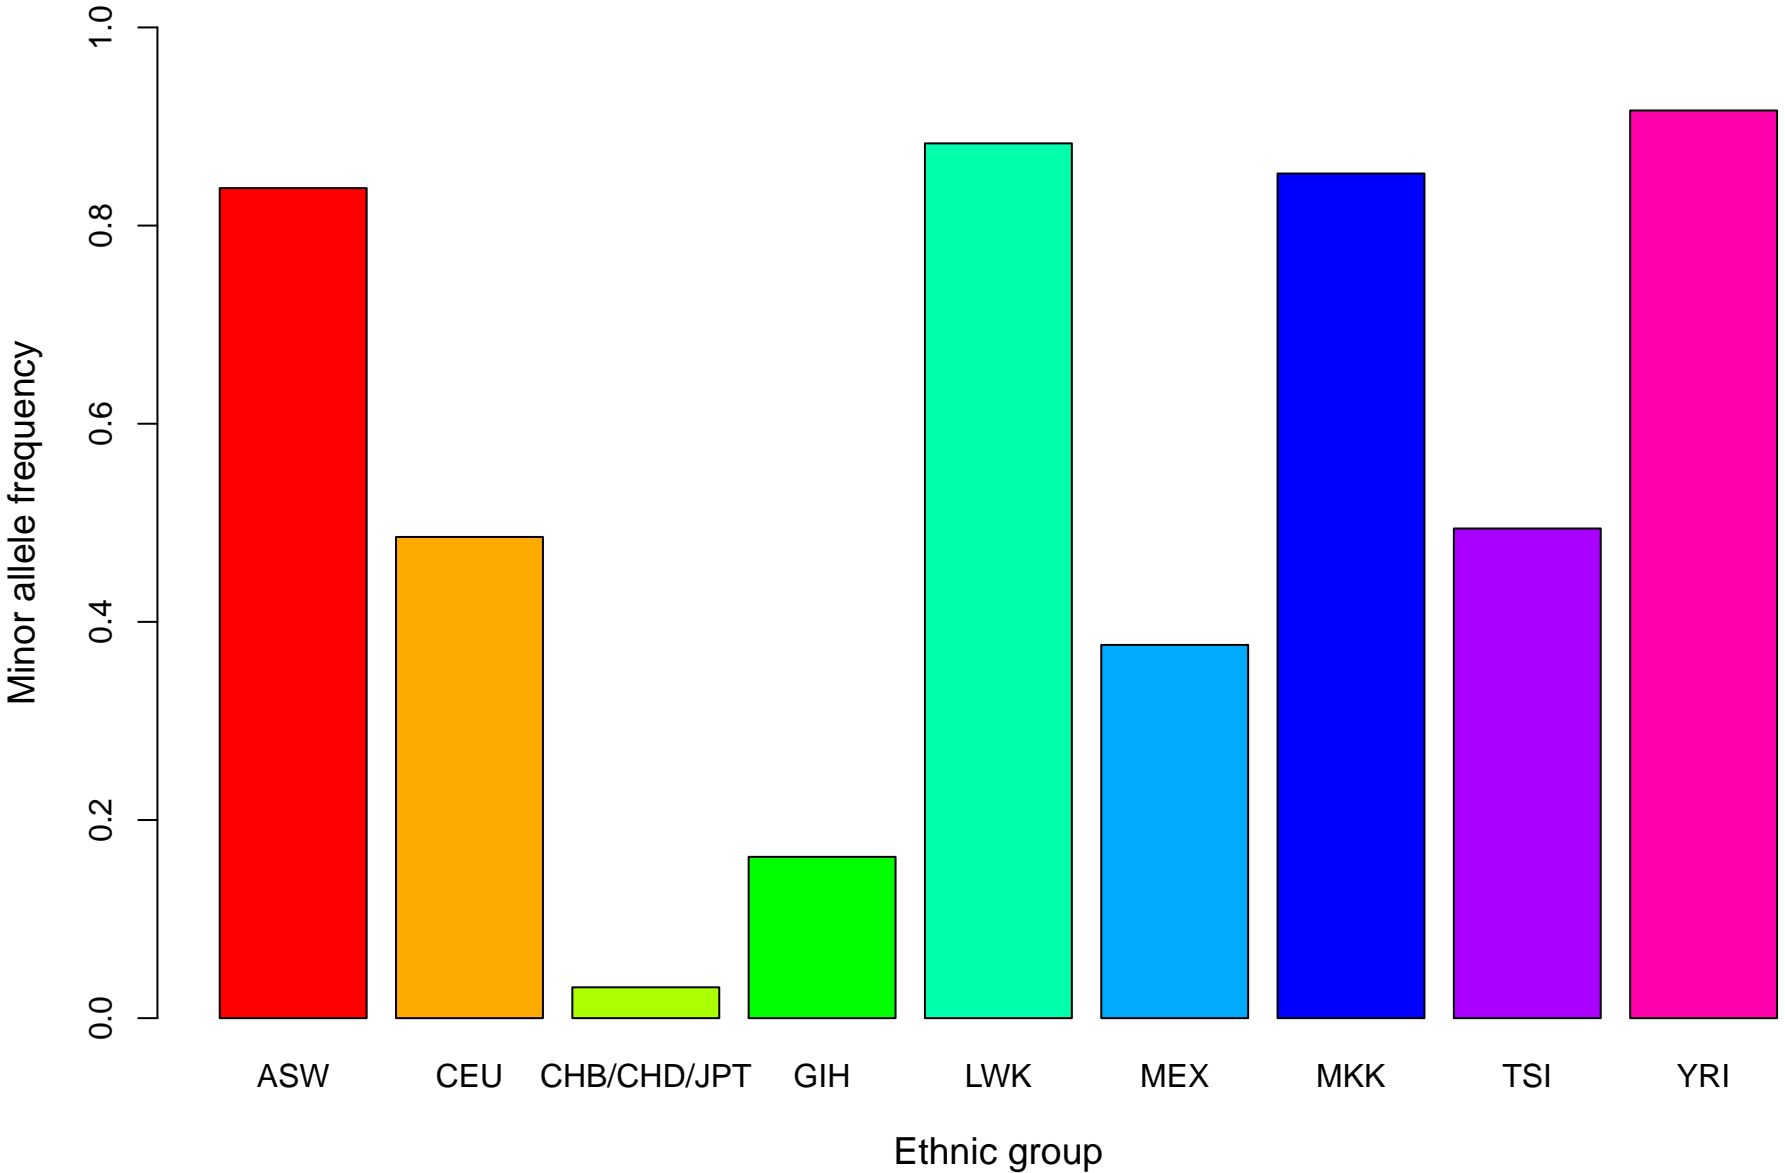

# rs7142344\_C

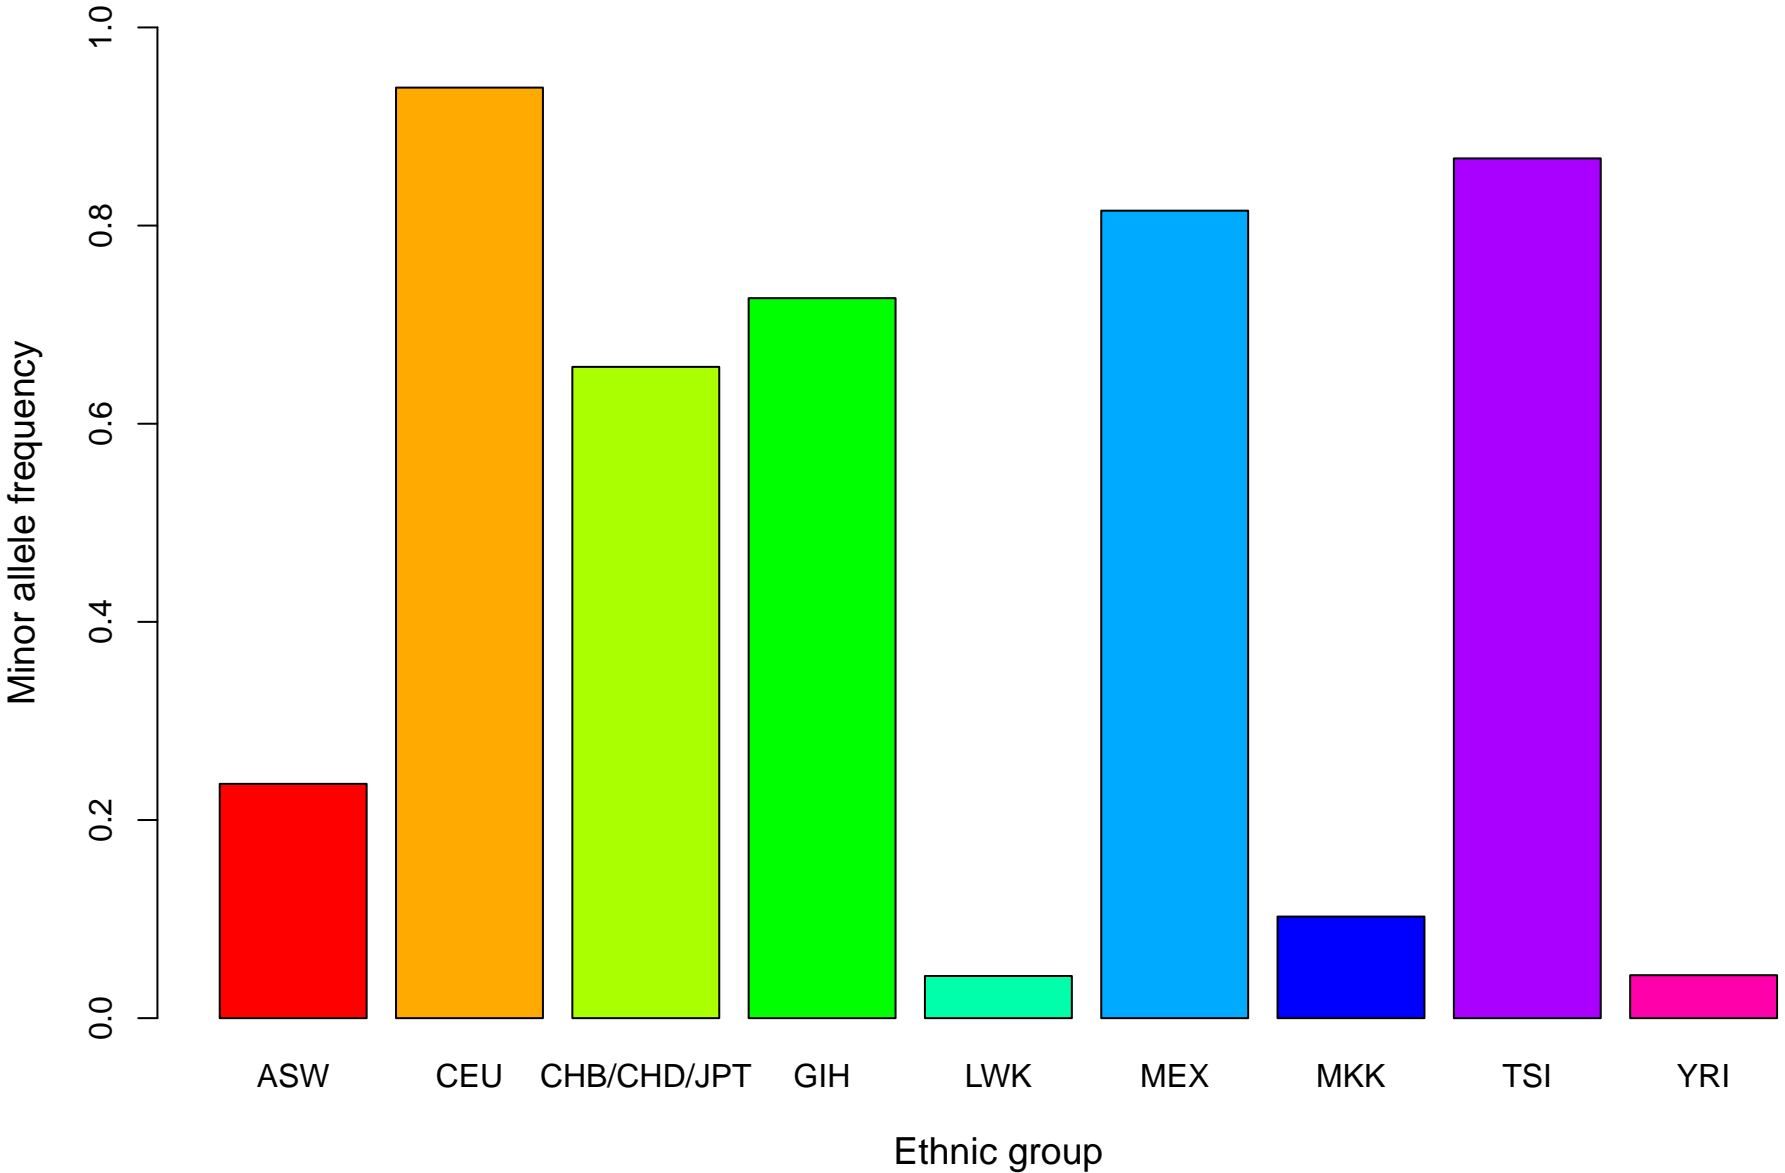

# rs6445860\_T

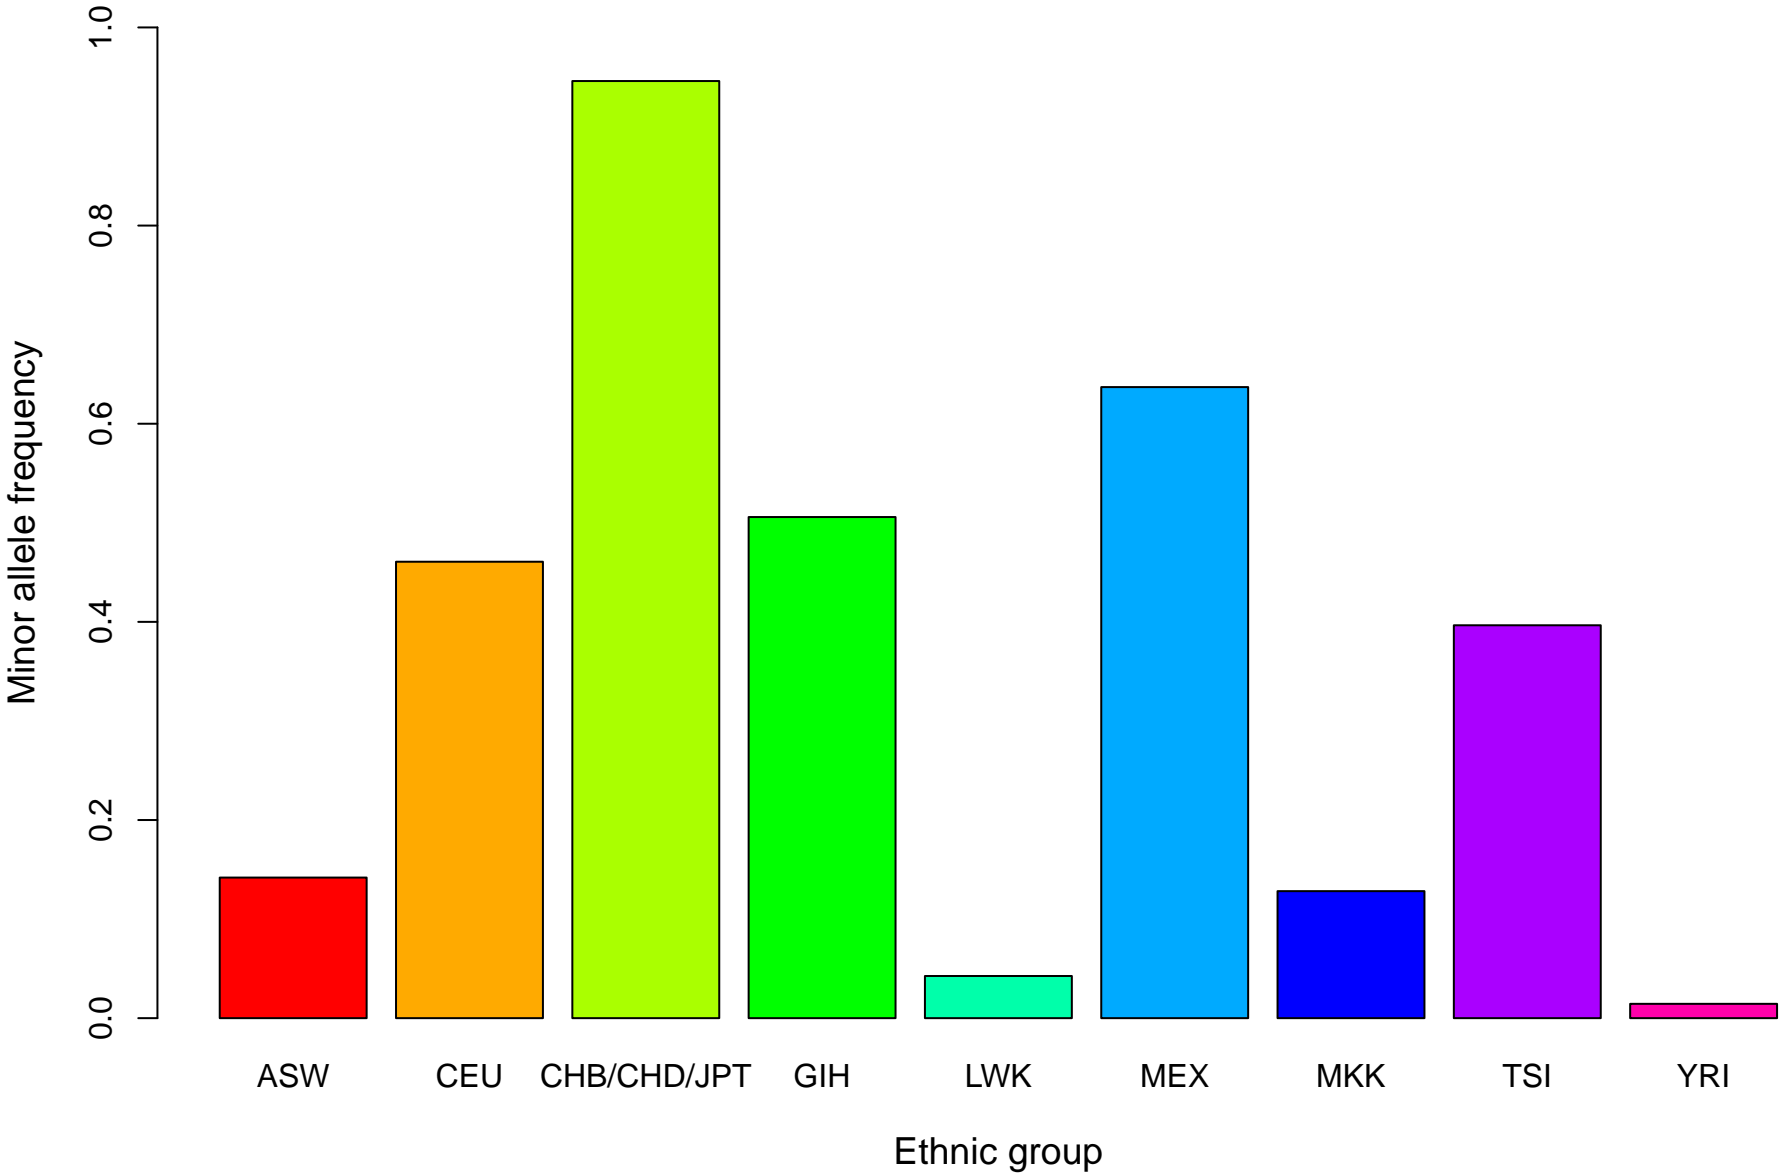

# rs9983496\_T

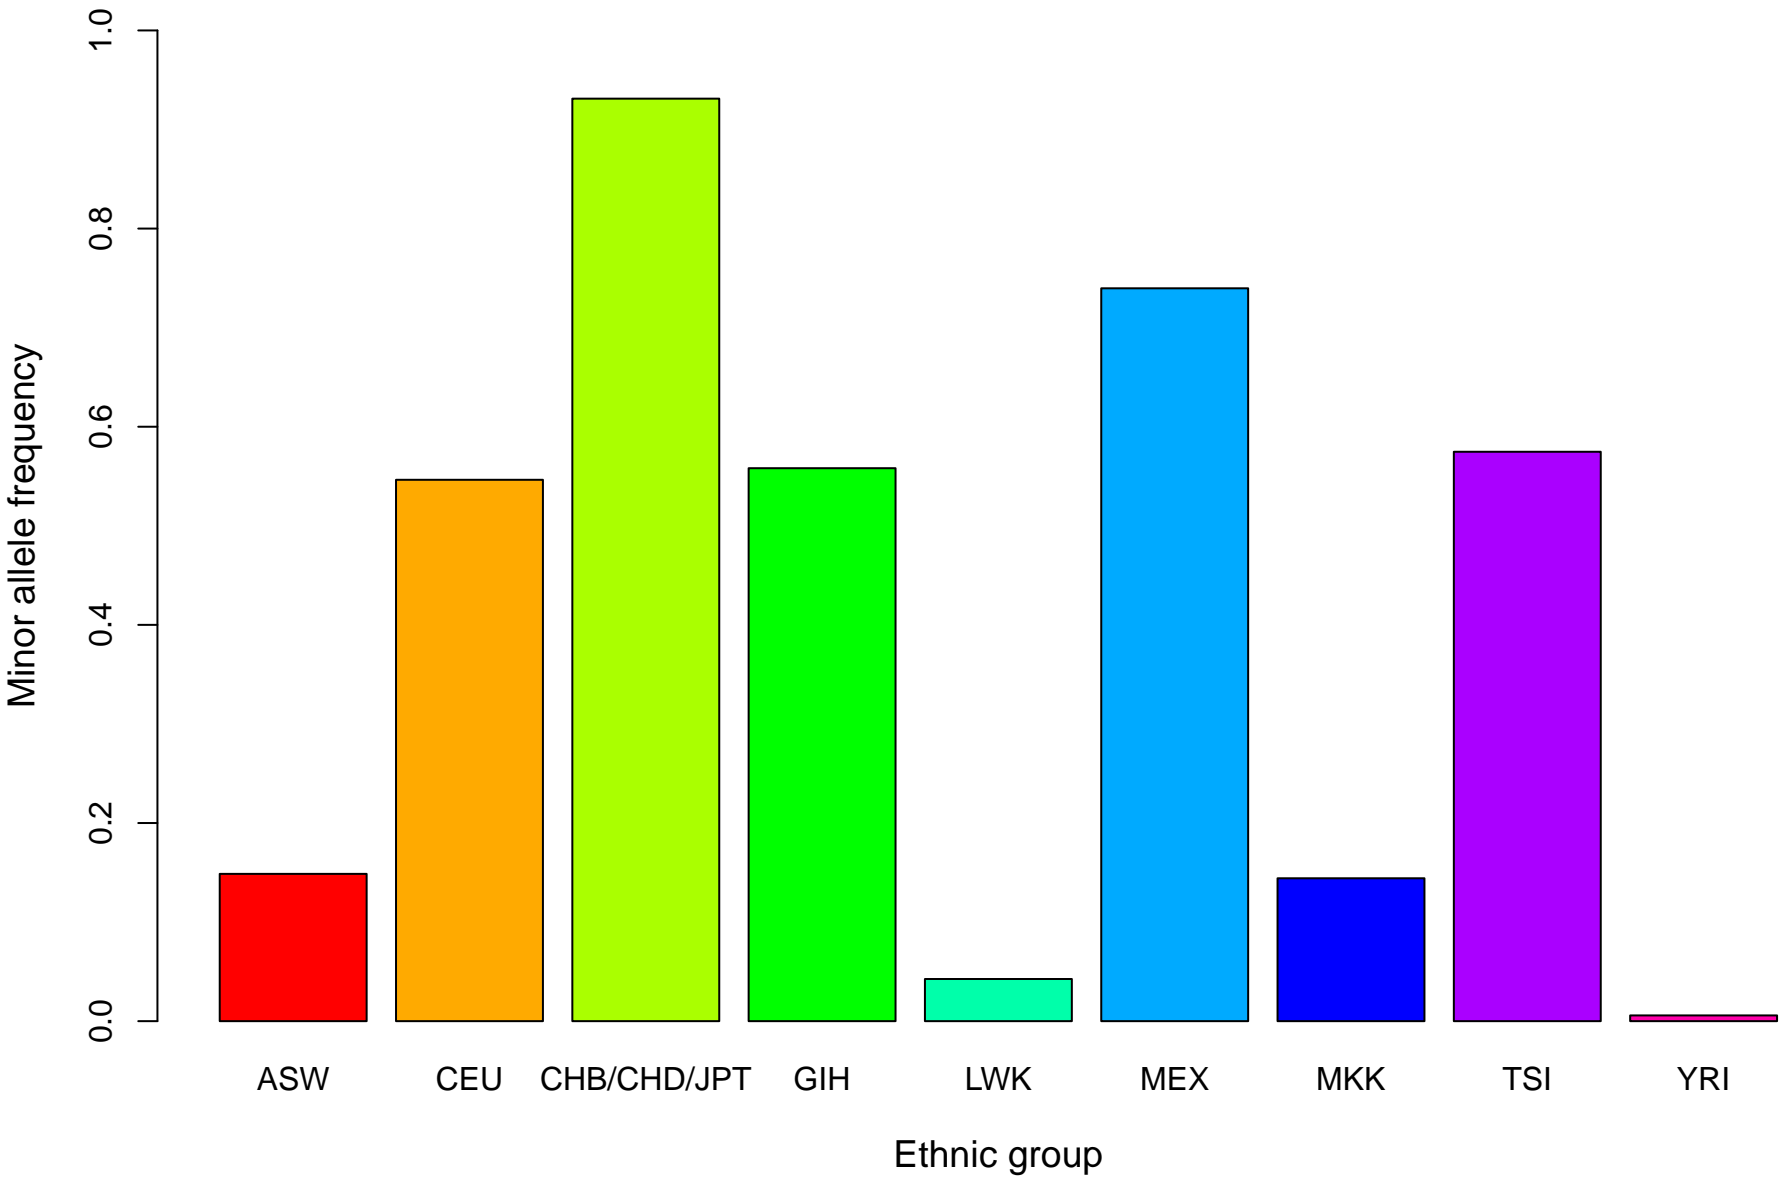



# rs13005005\_T

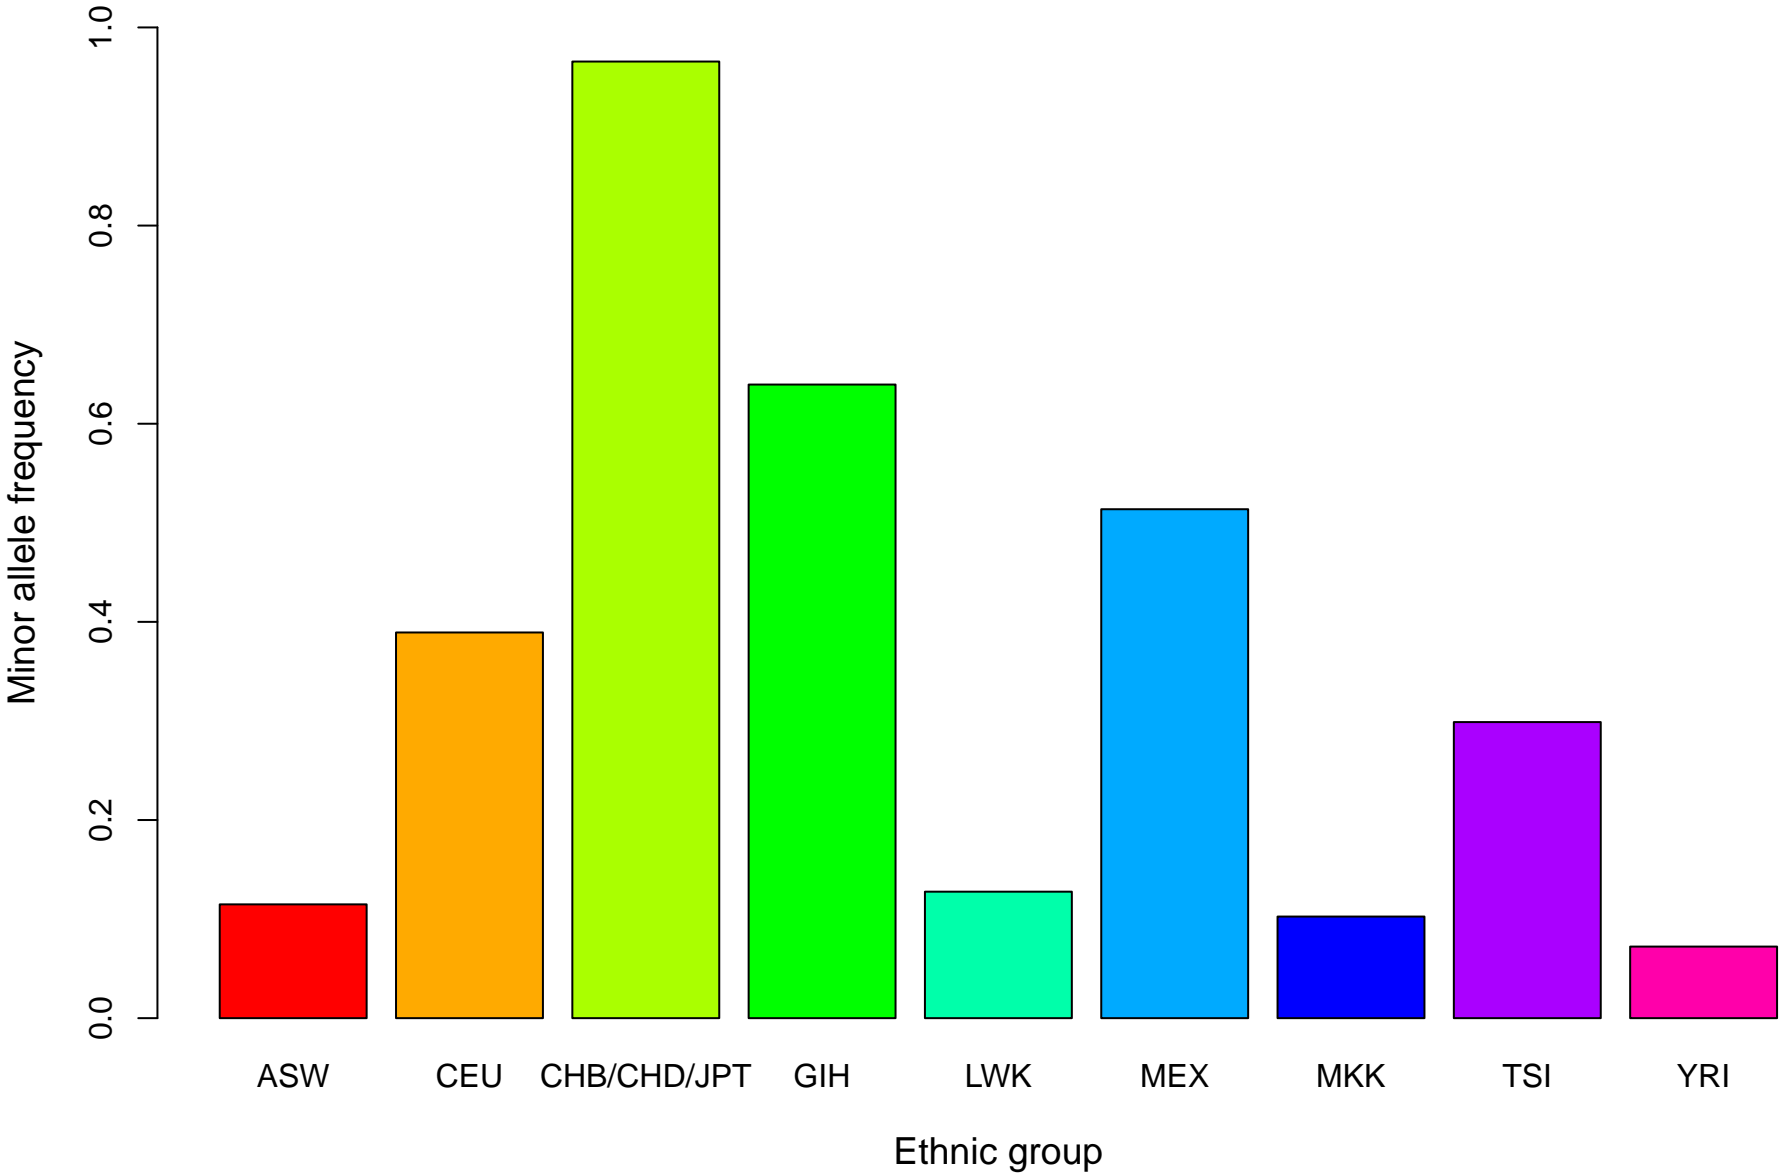

# rs486889\_G

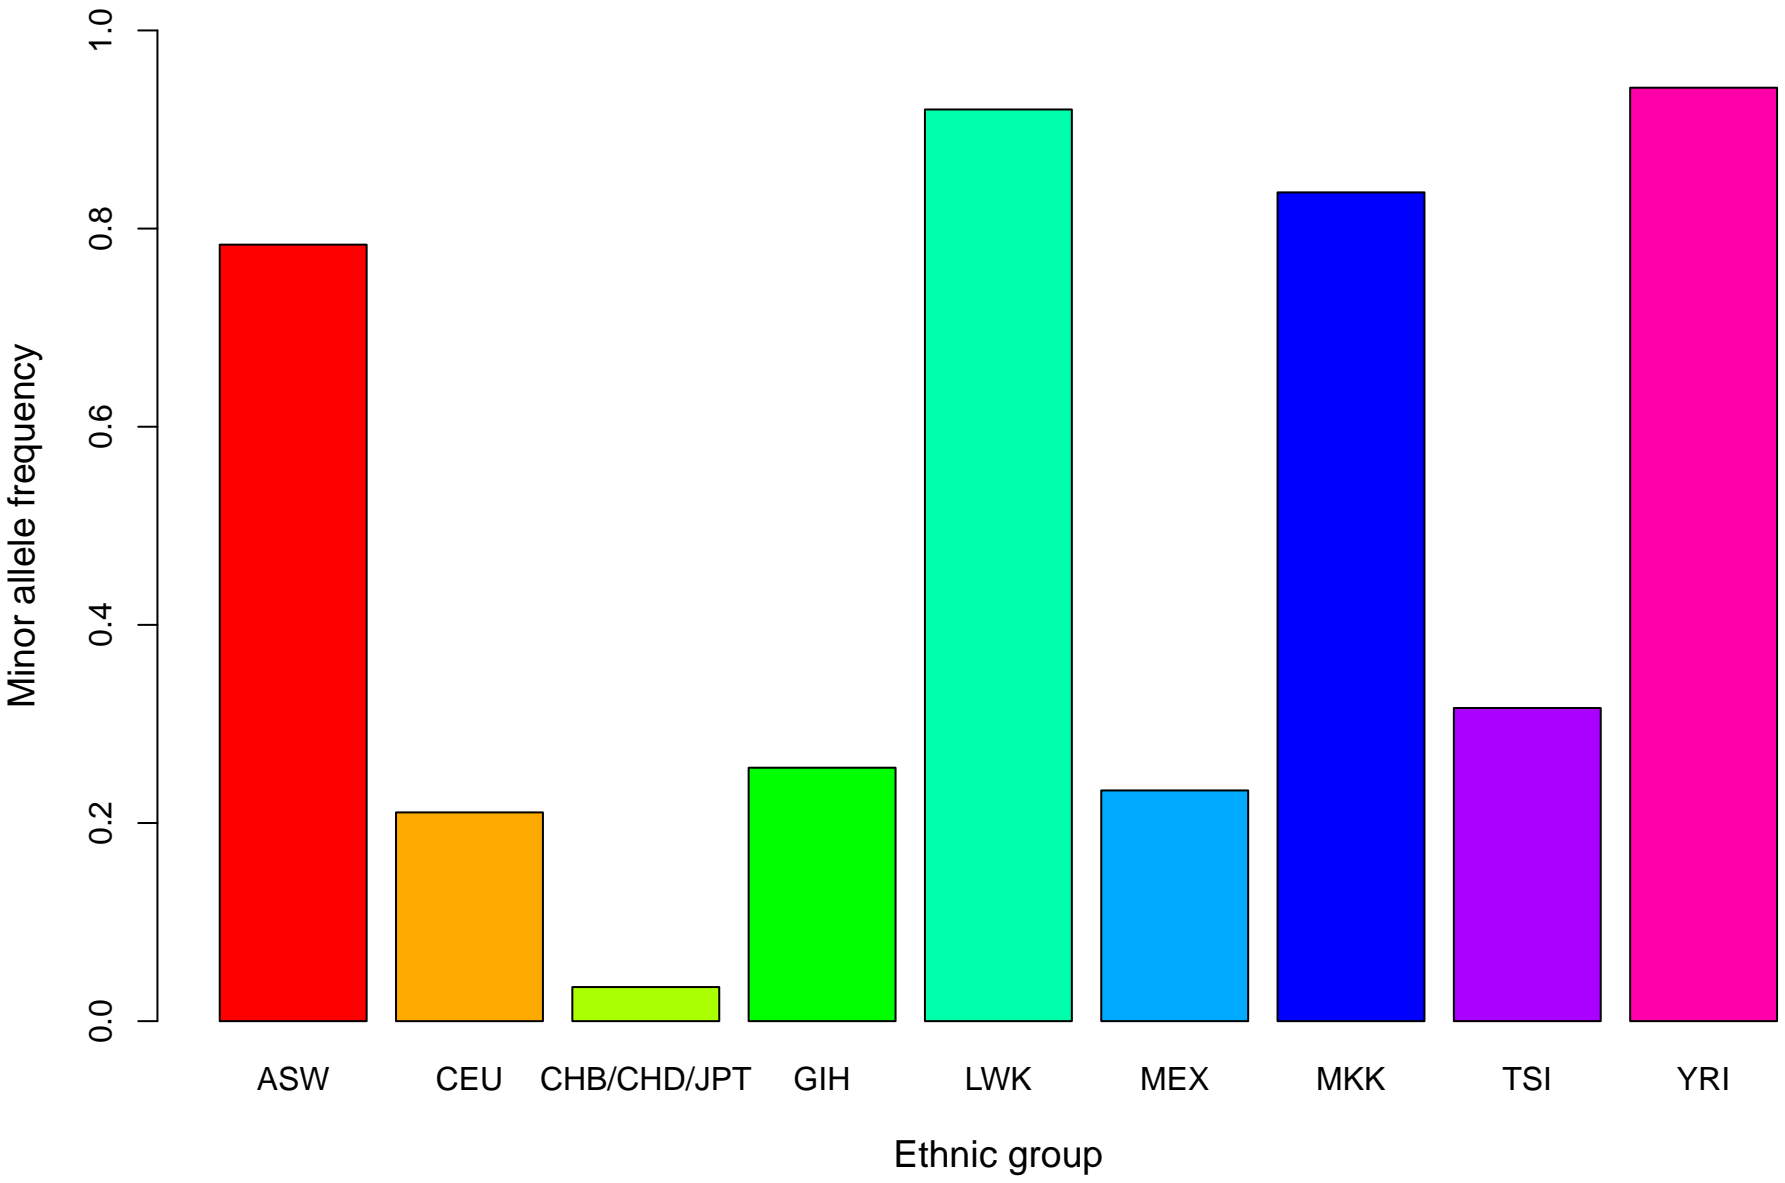

# rs11051\_G

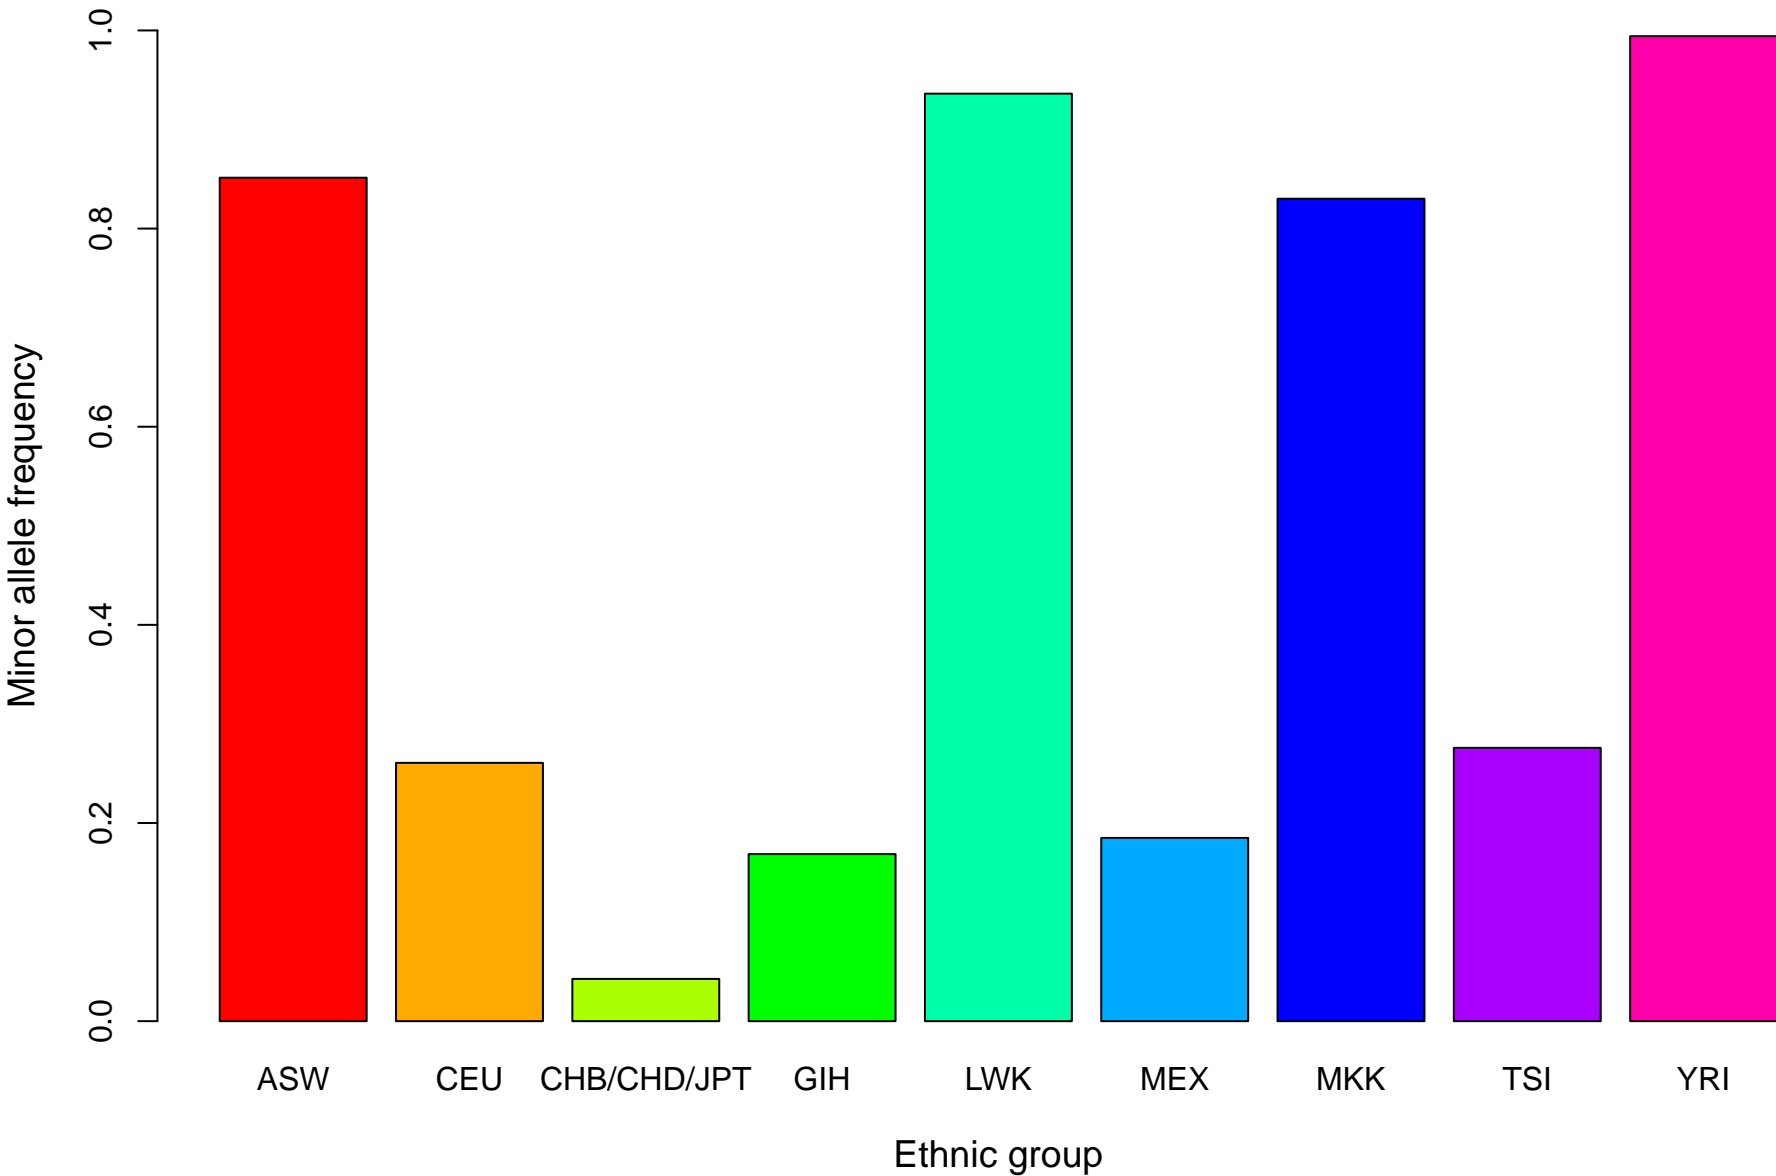

# rs2736292\_A

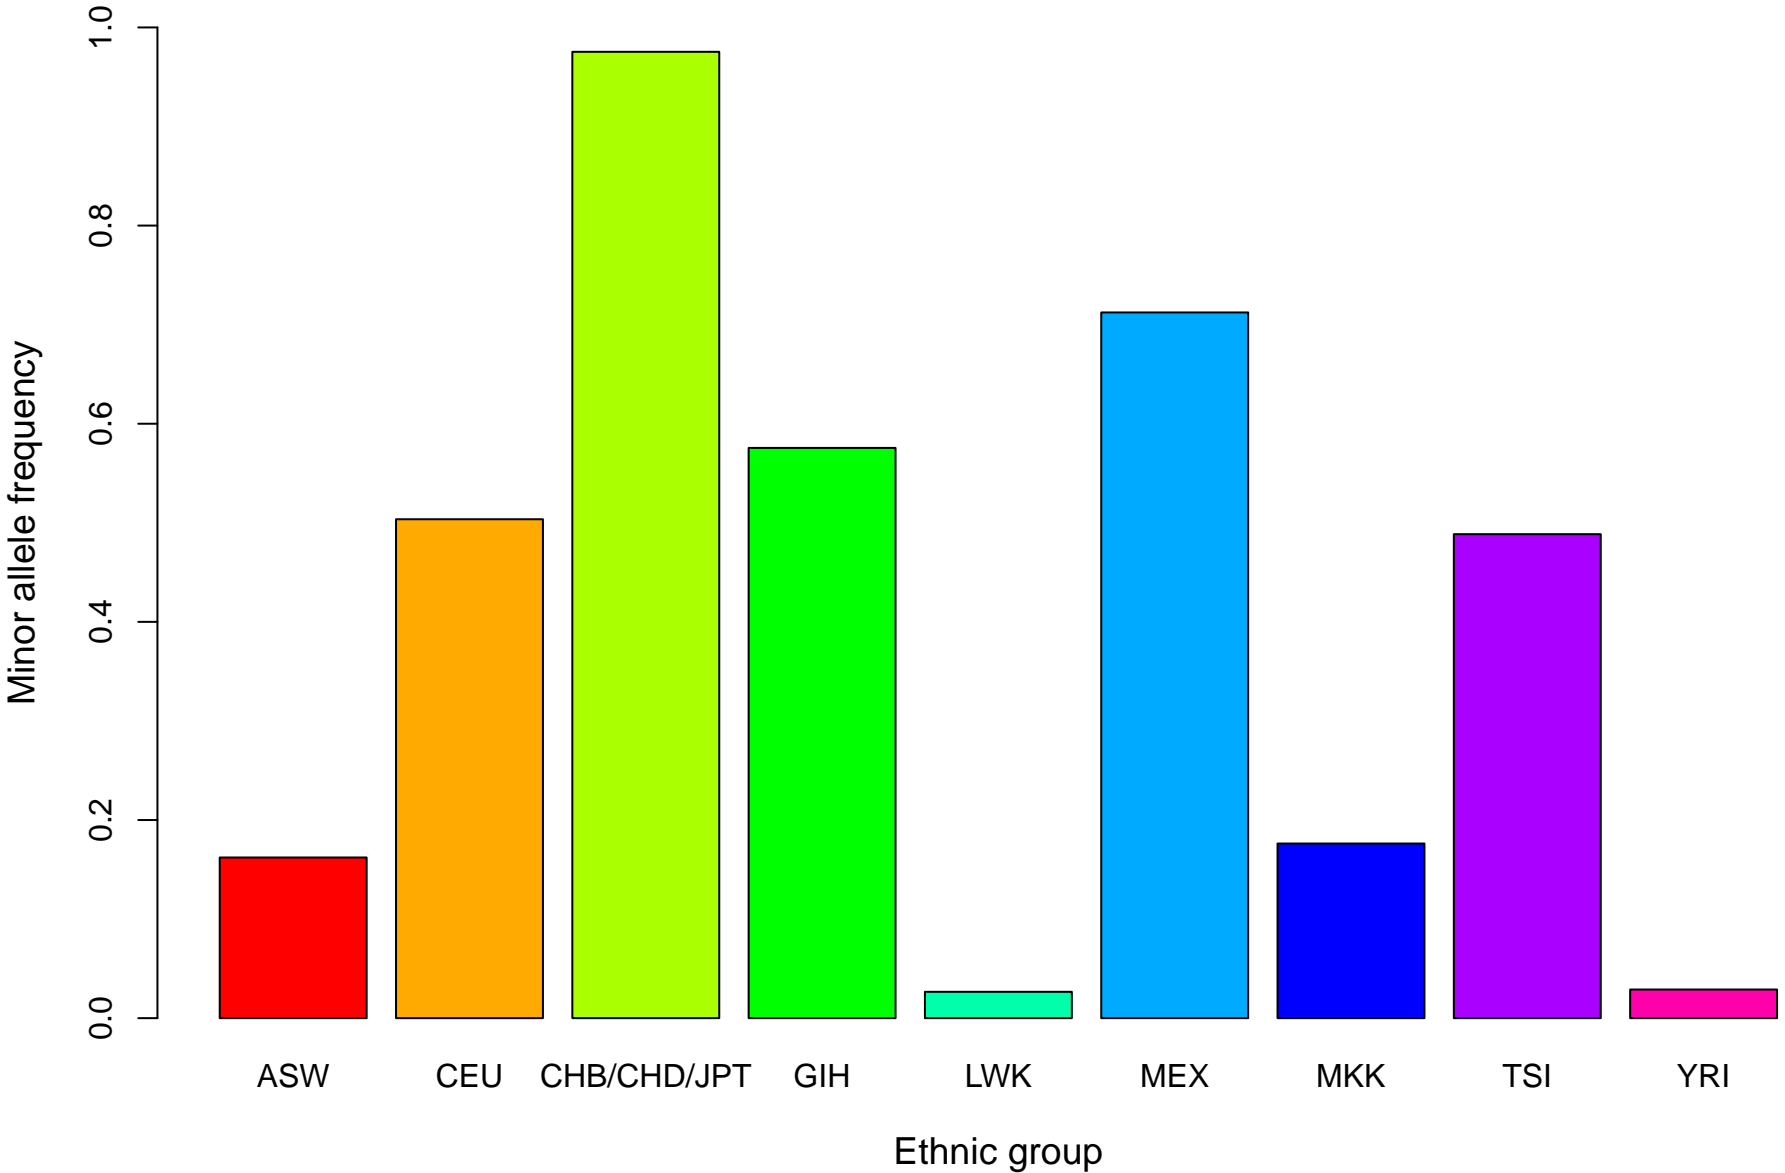

# rs161272\_A

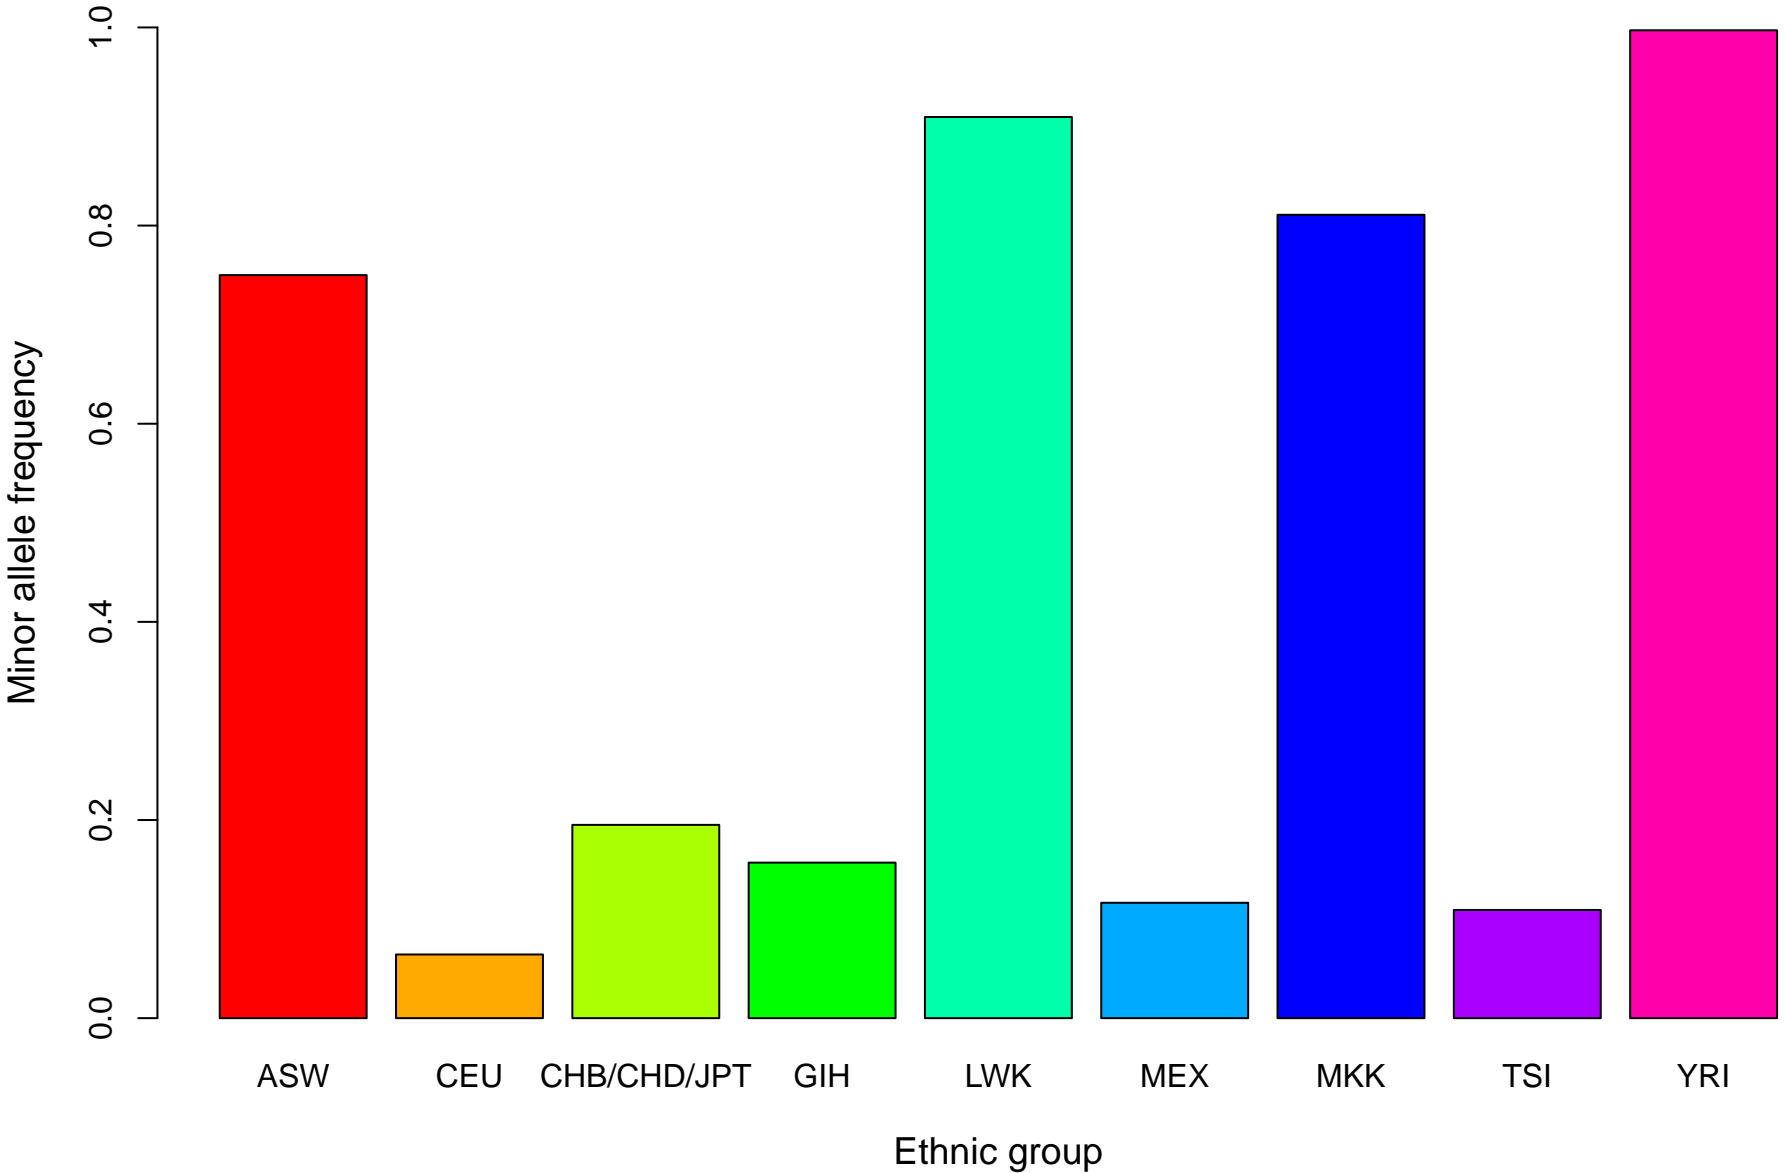

# rs7732591\_T

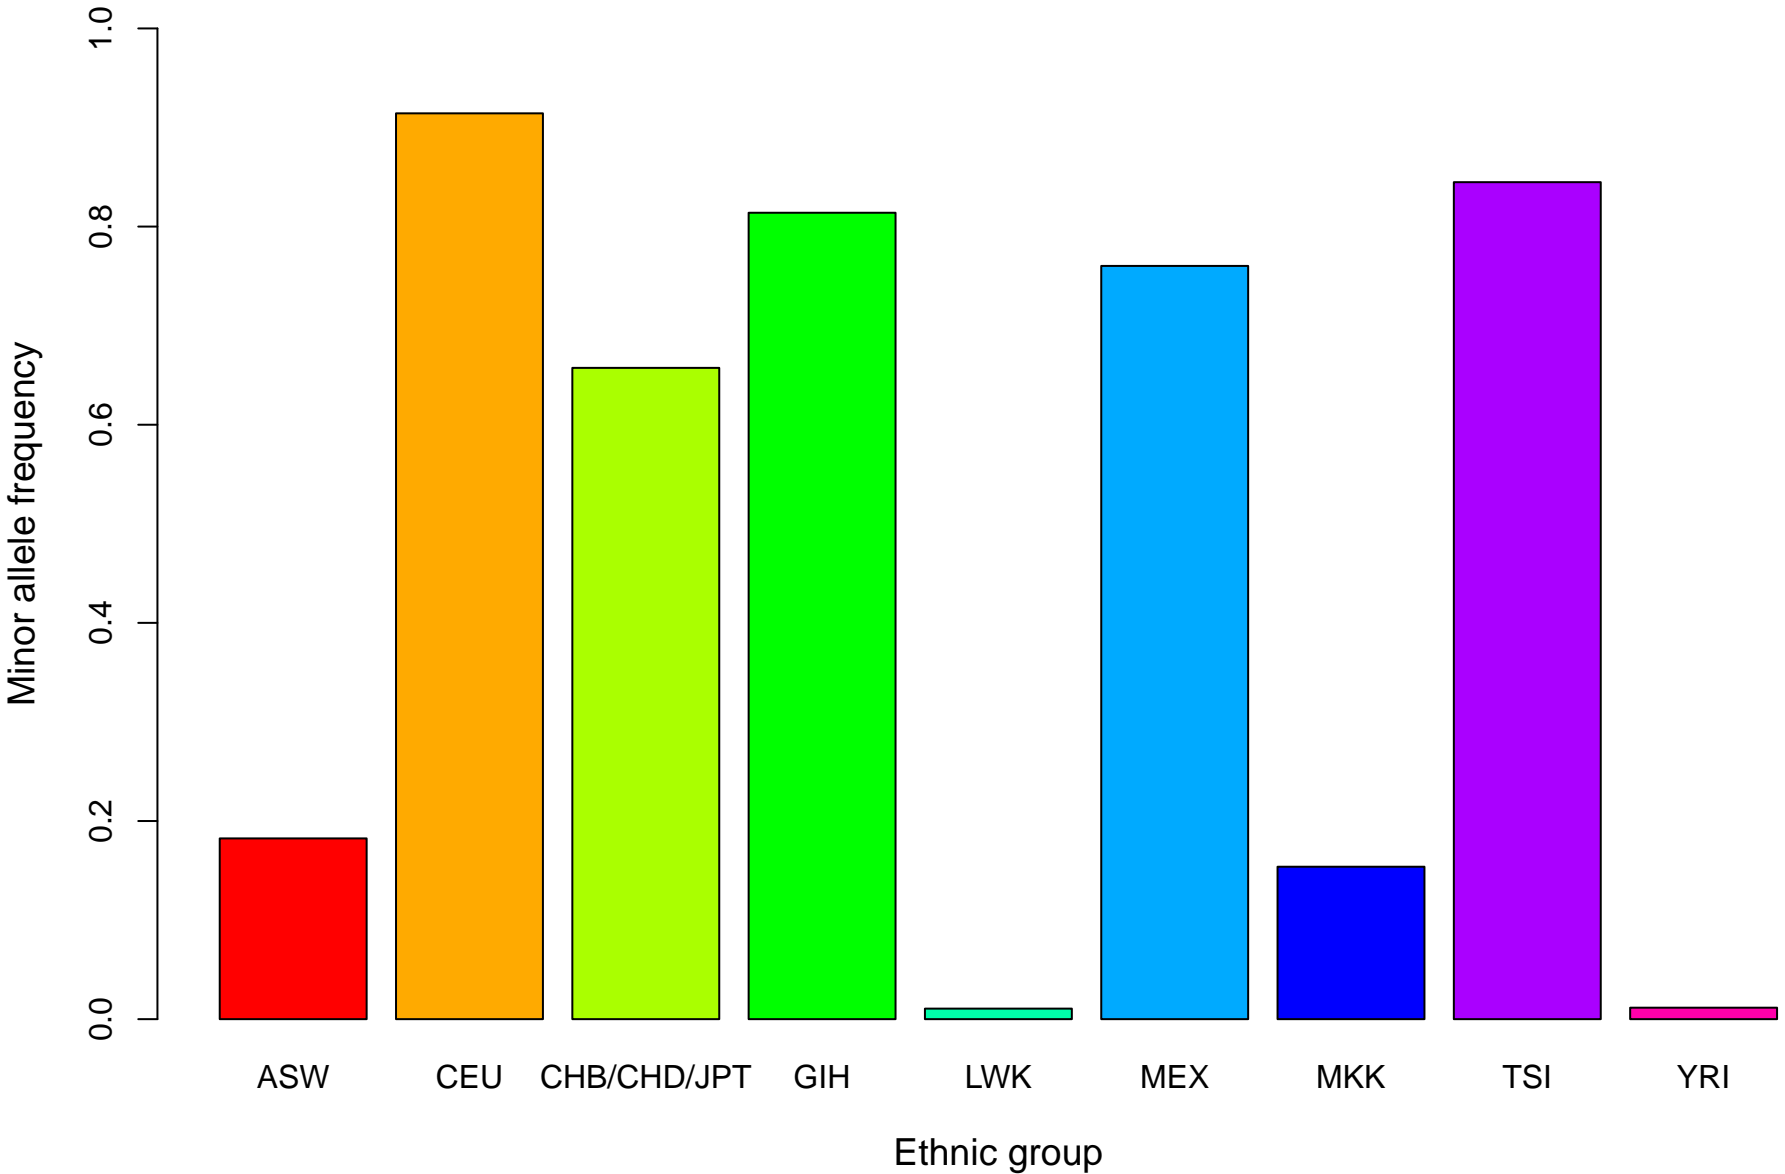

# rs35719811\_C

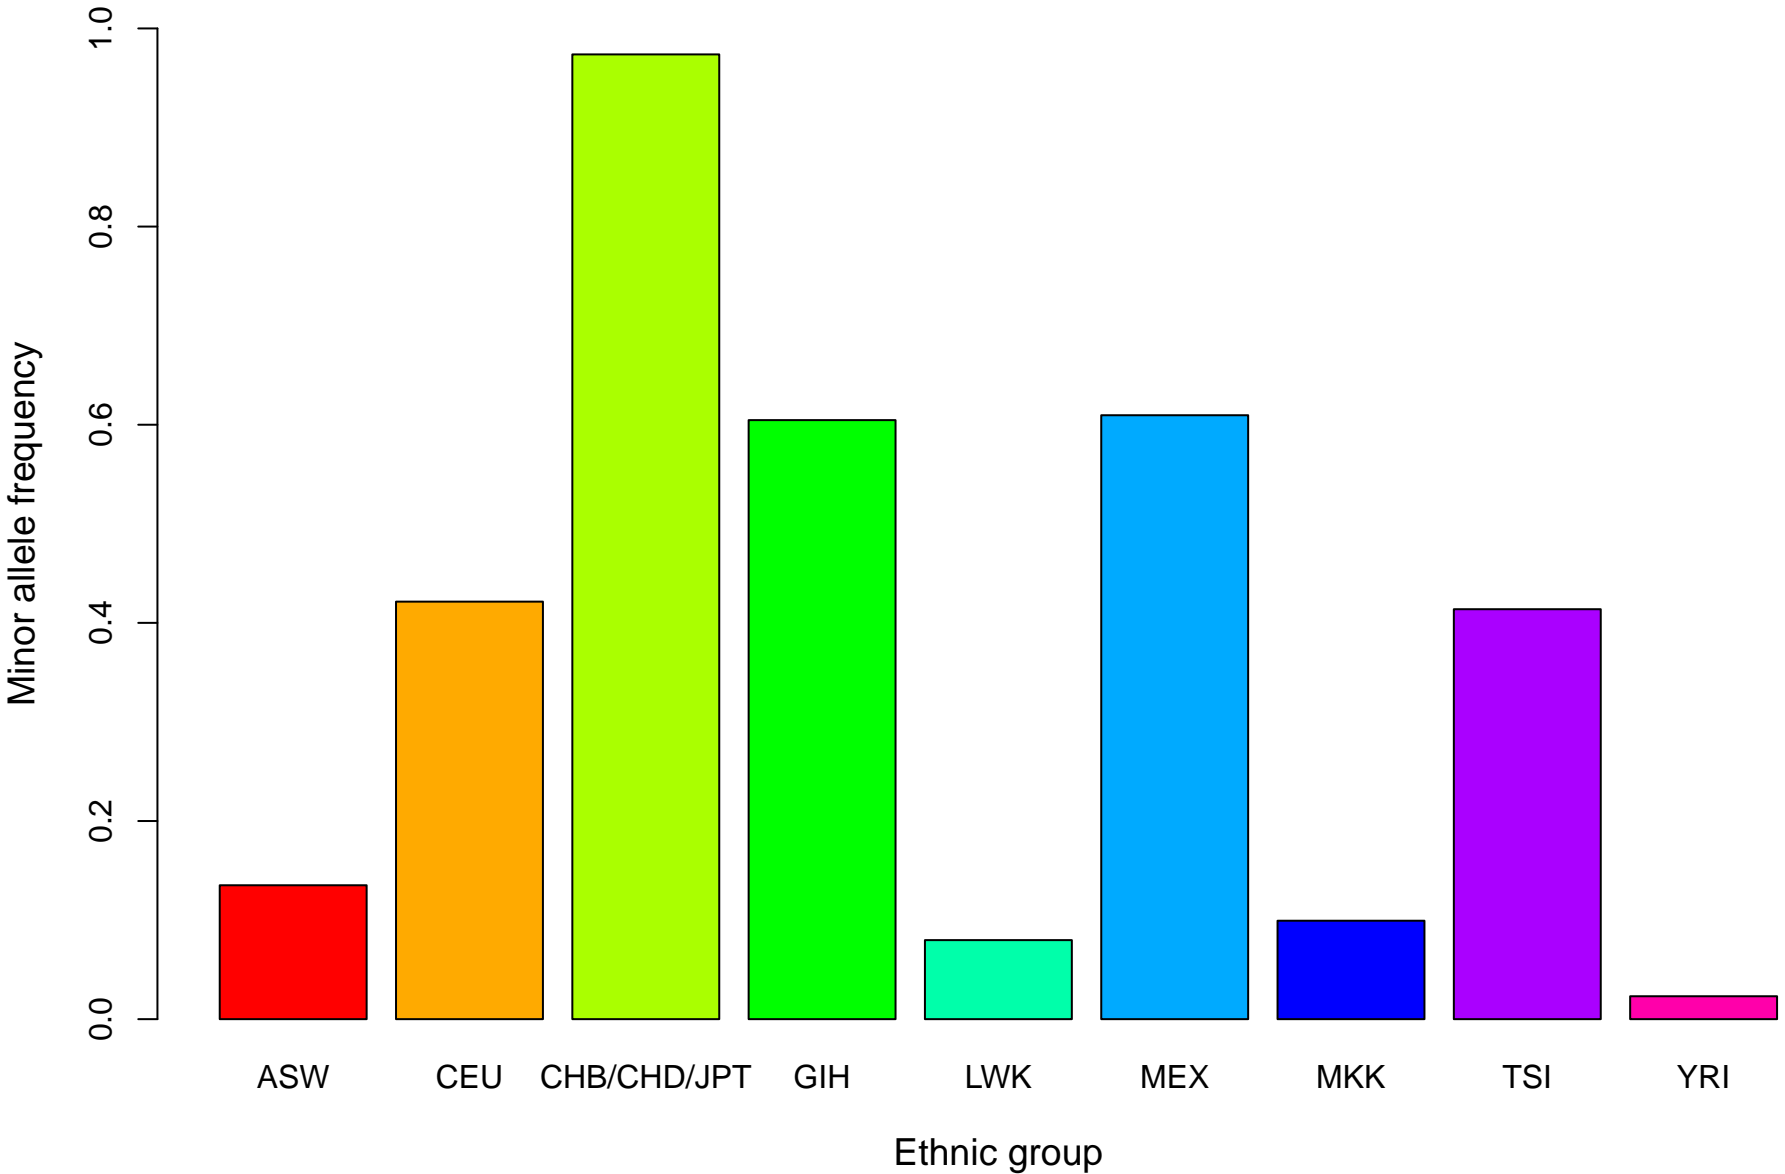

# rs6993205\_A

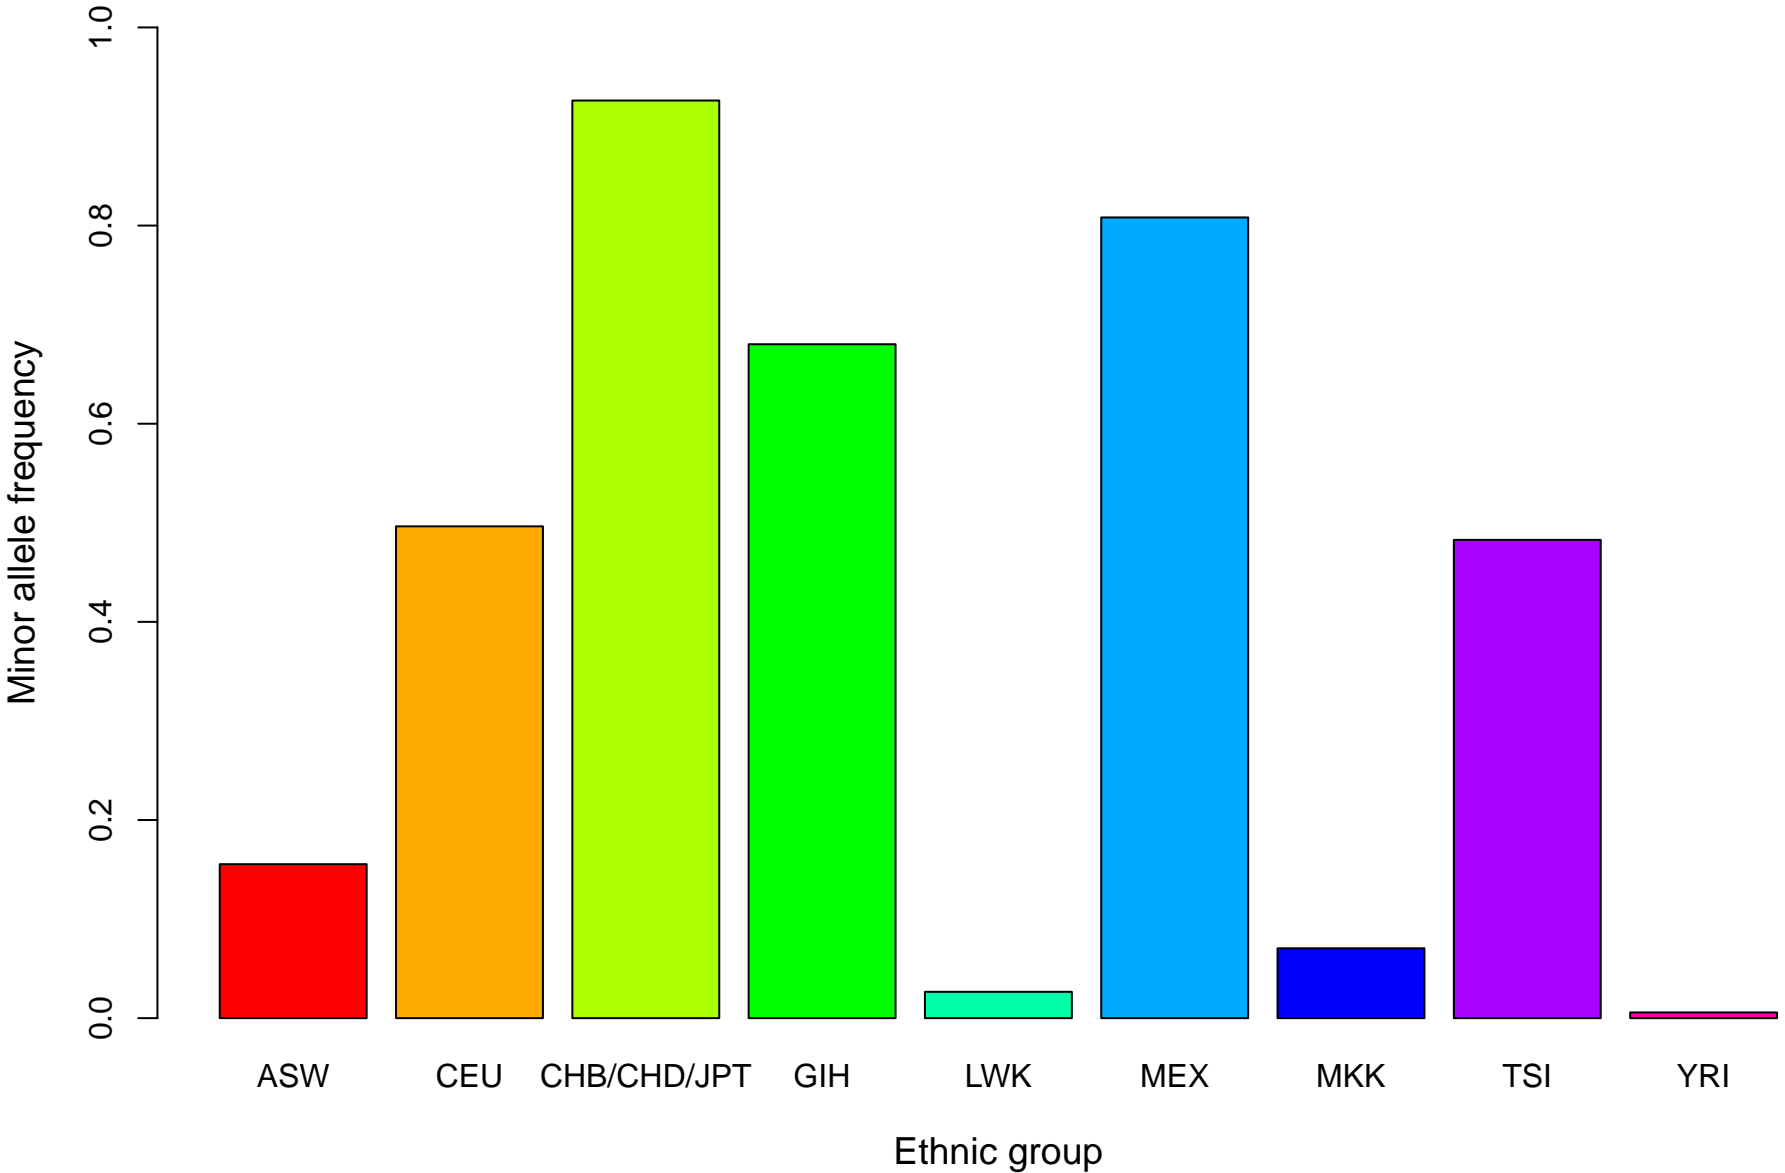



# rs1472493\_G

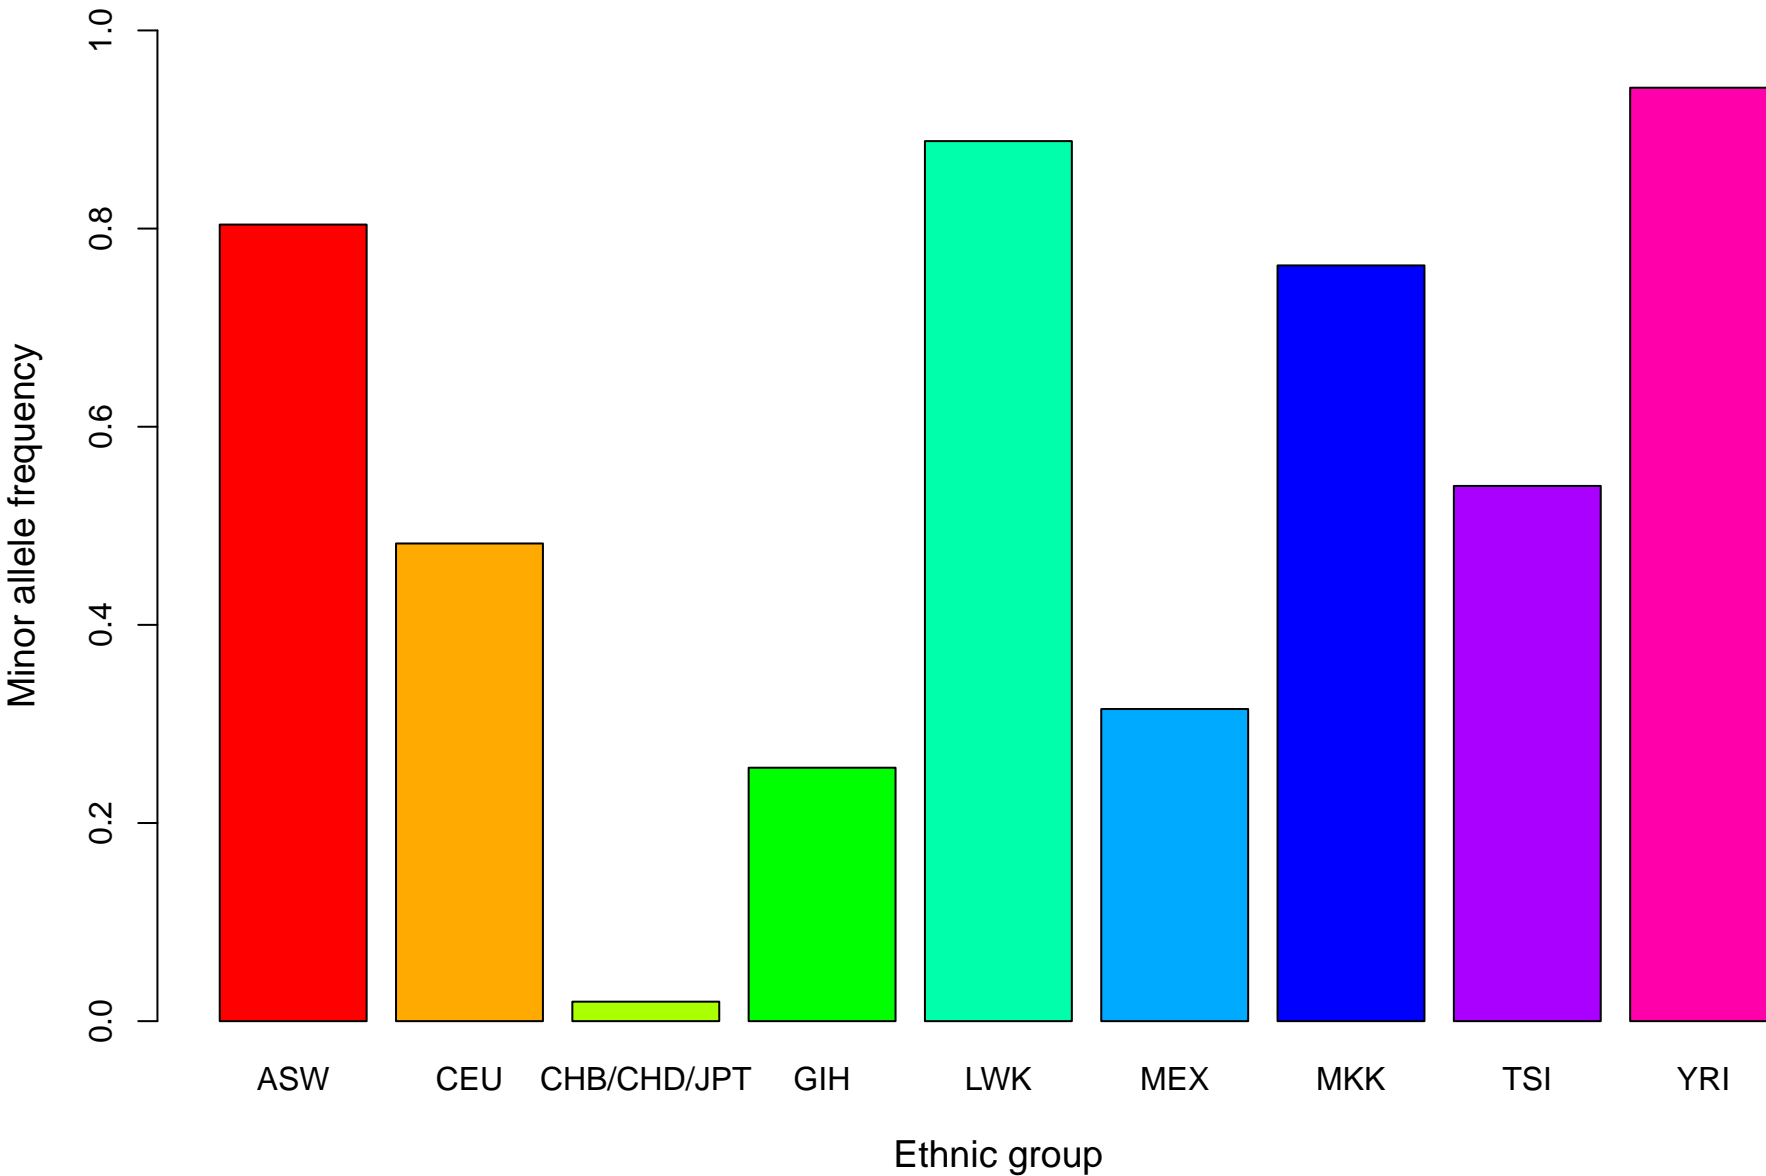

# rs6560084\_T

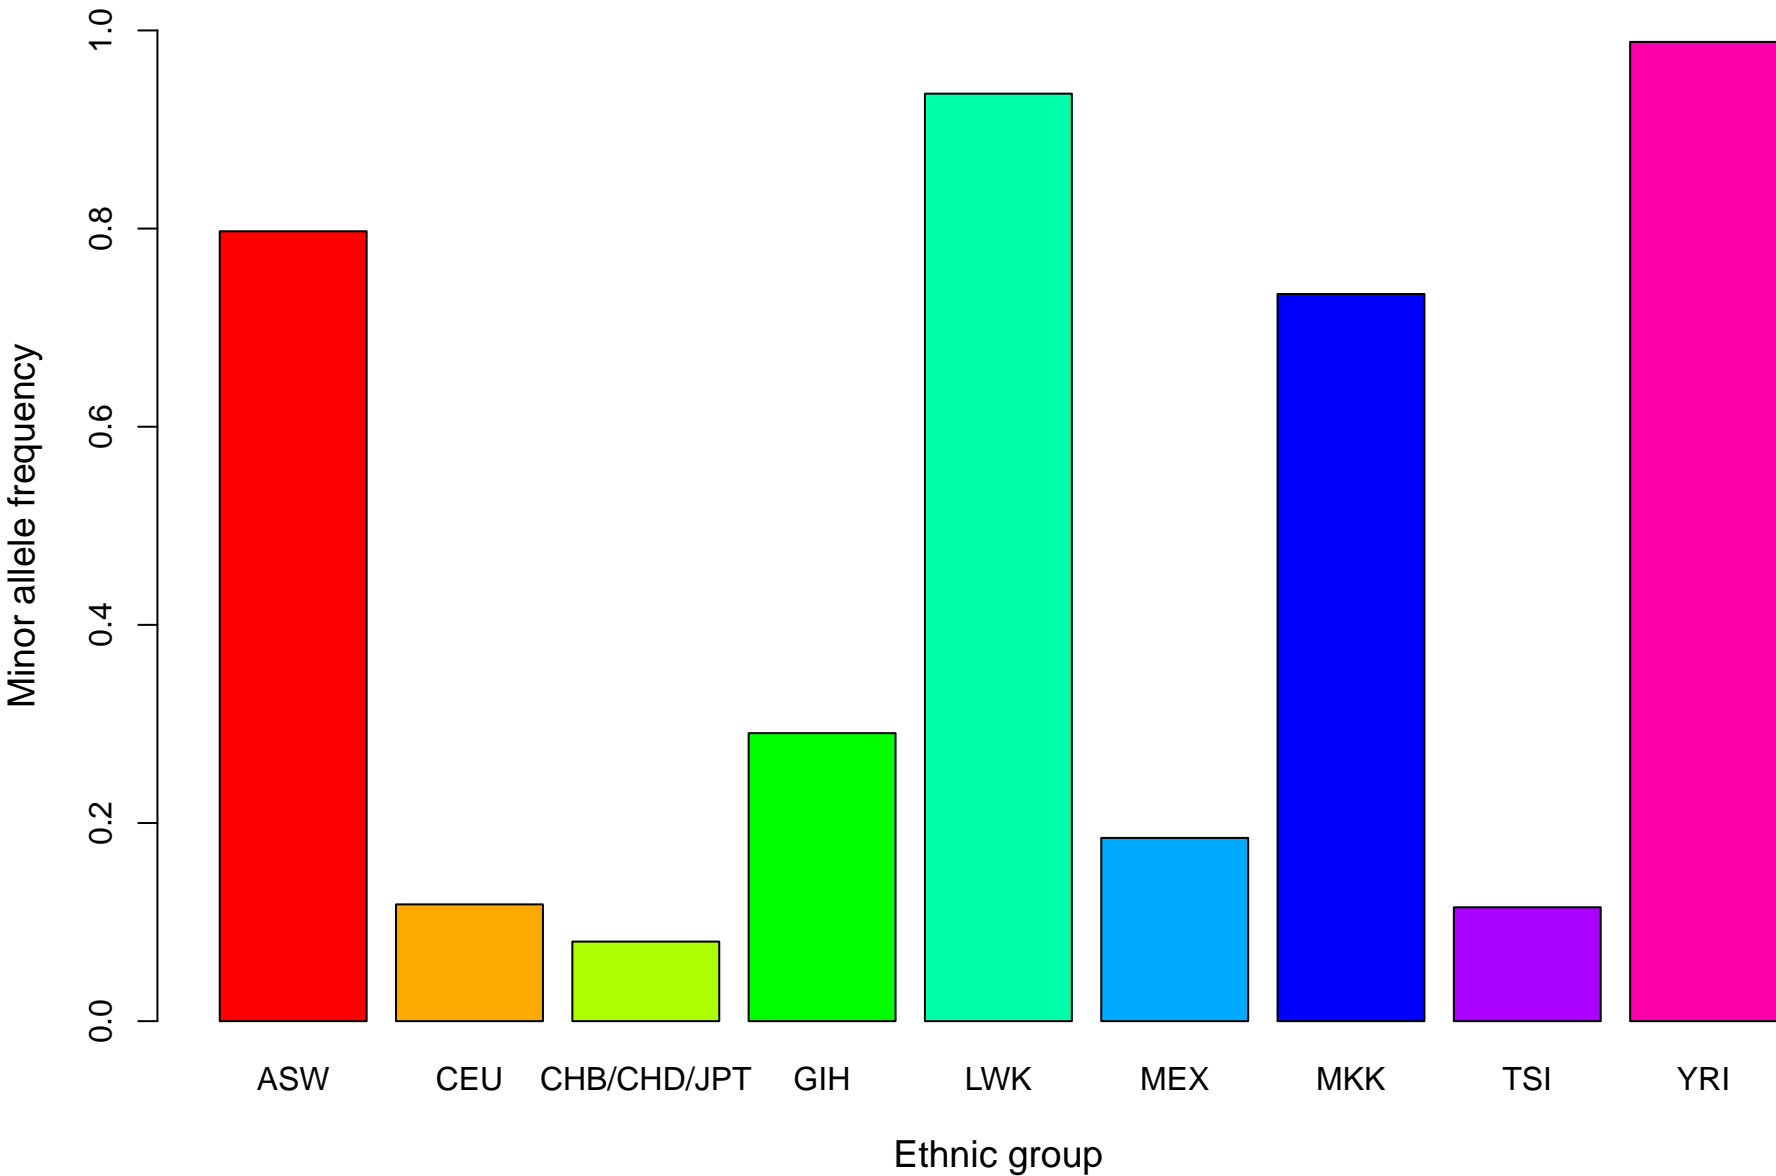

# rs798789\_T

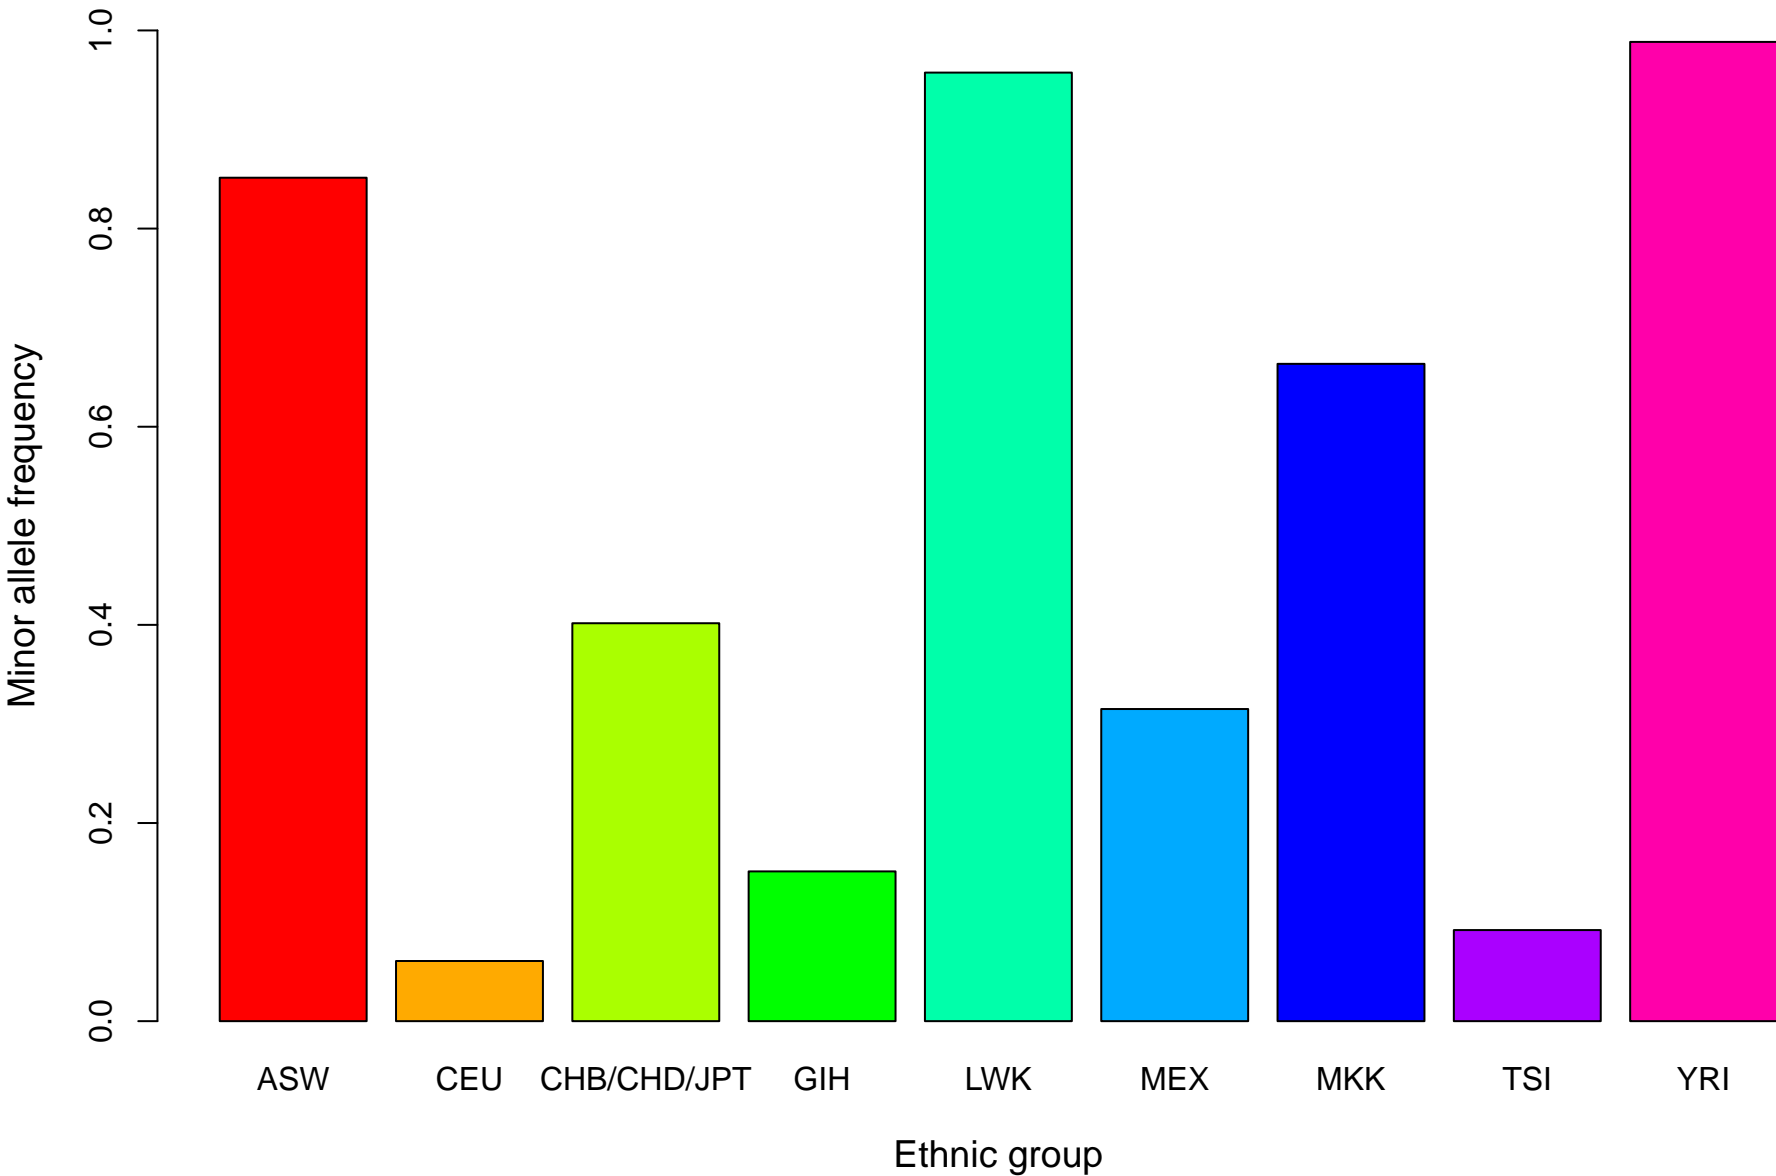

# rs738987\_G

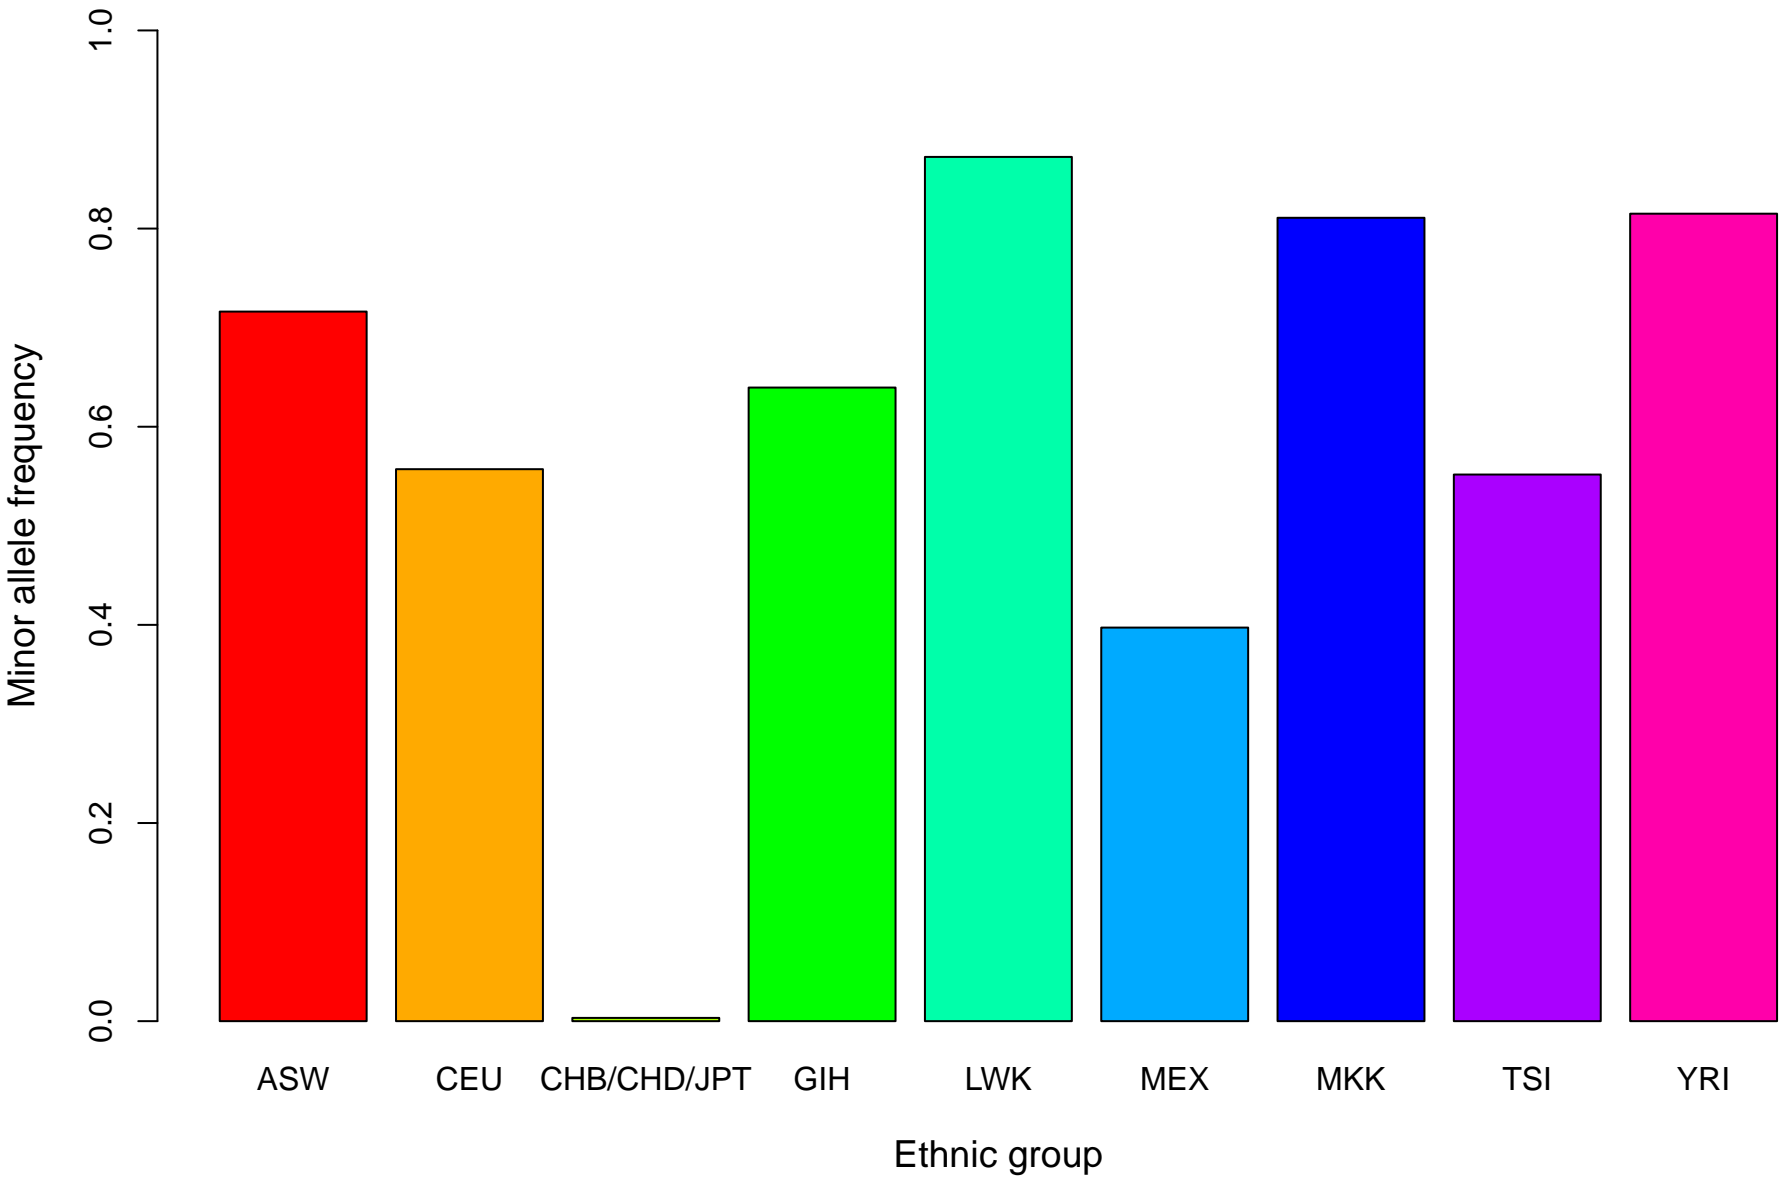

# rs7187359\_A

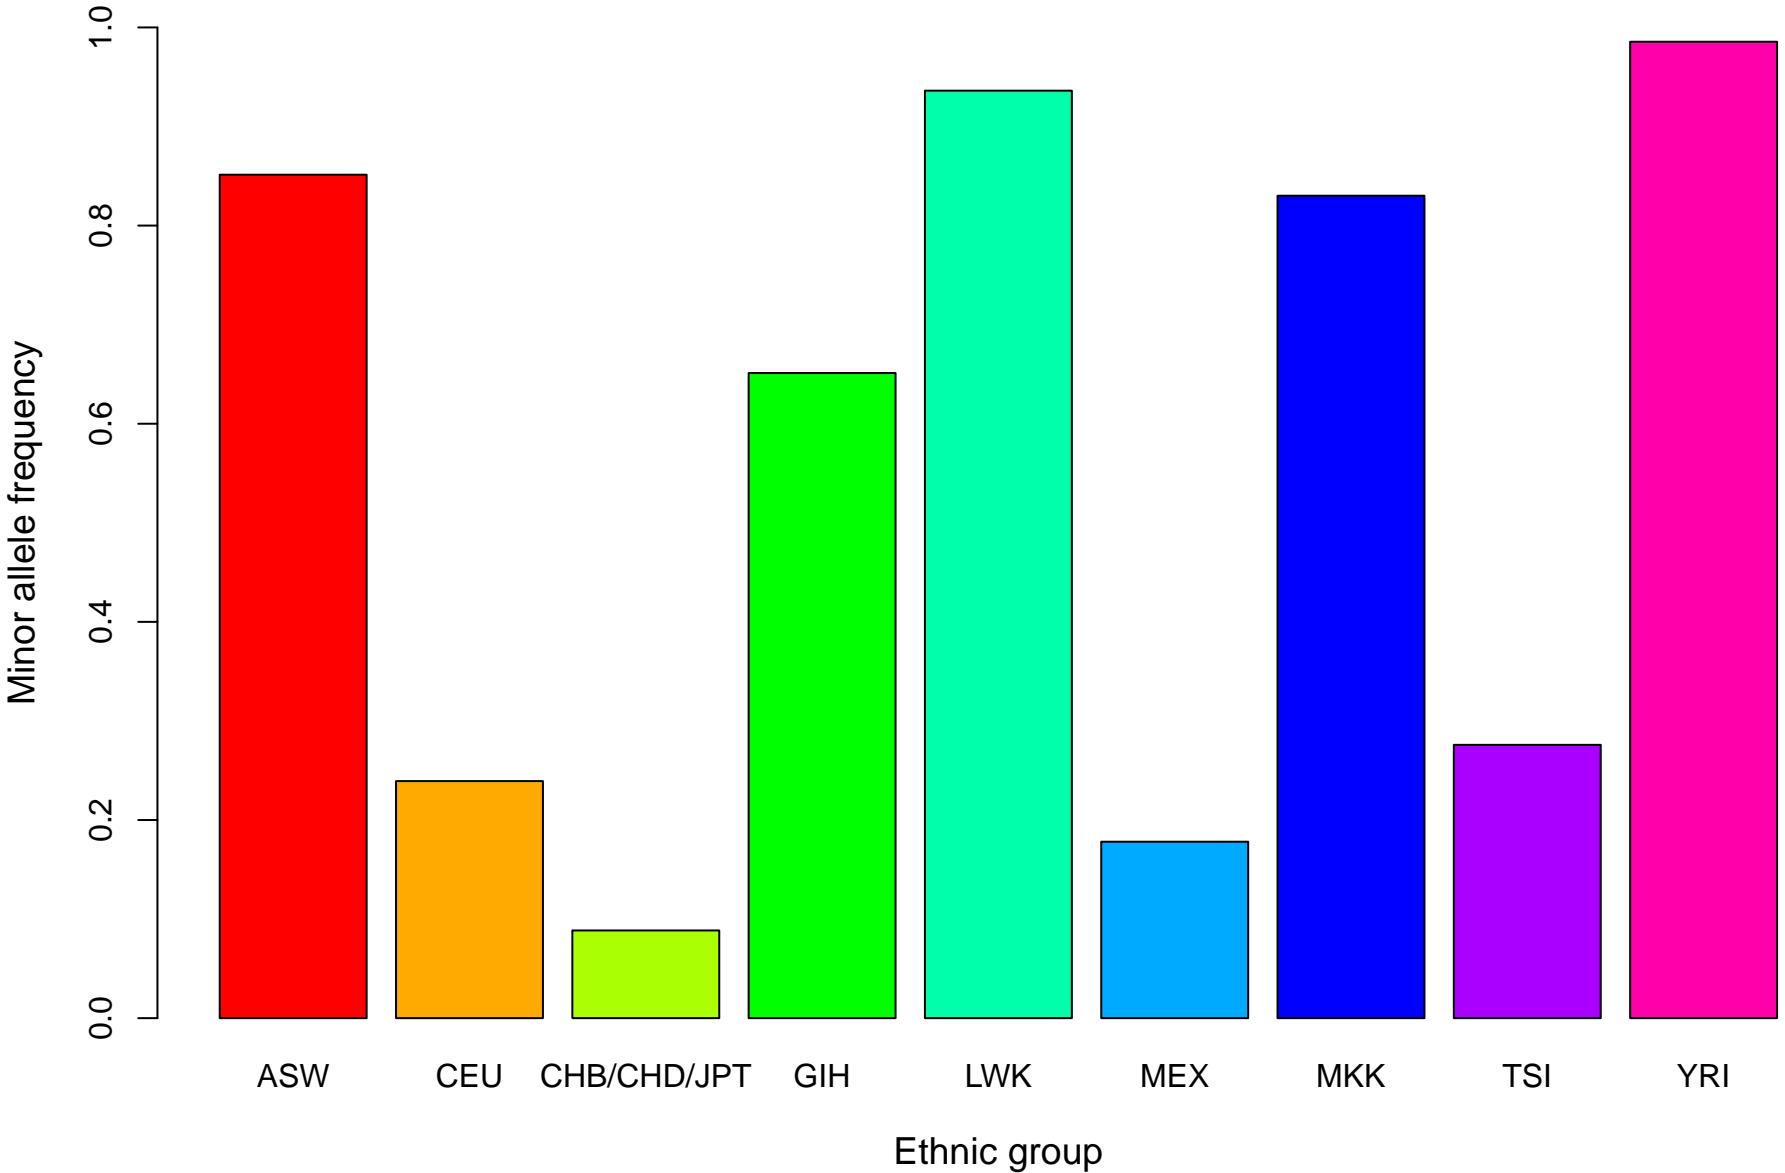

# rs224632\_A

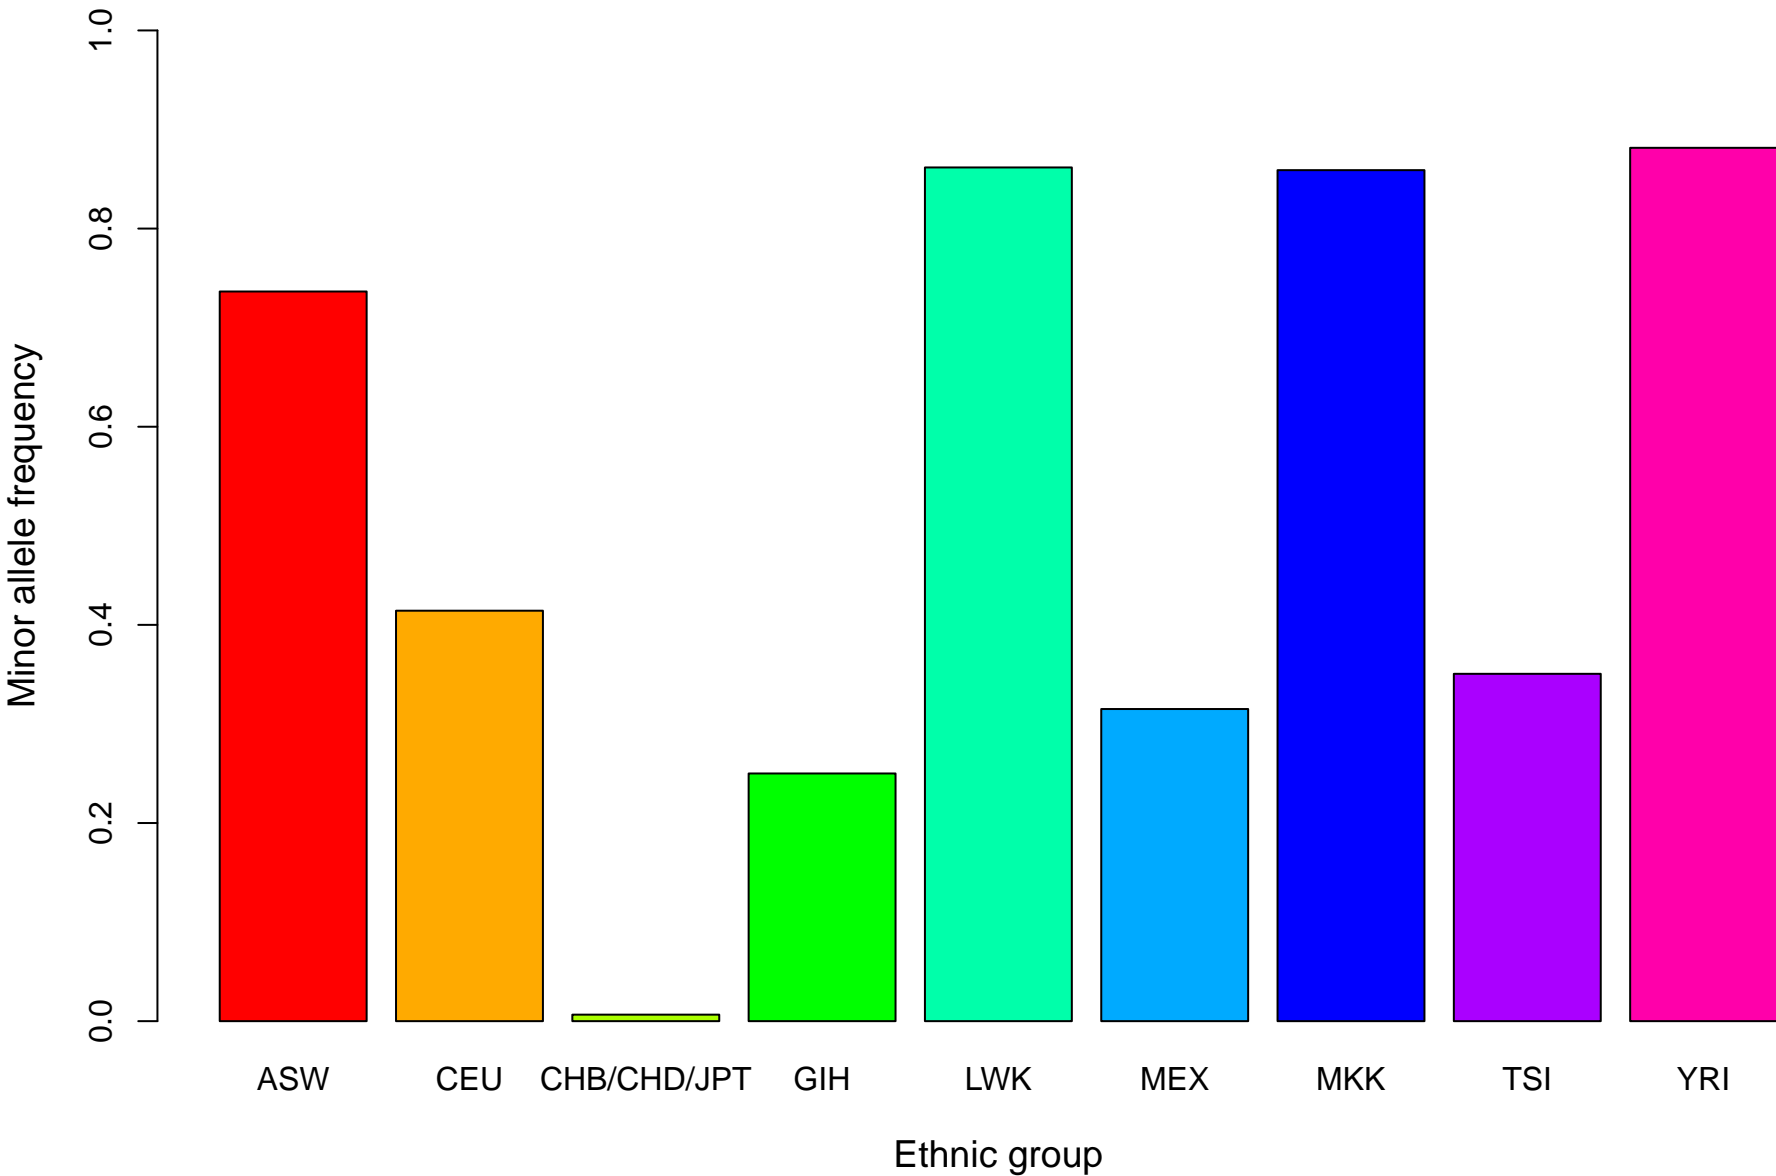

# rs4453755\_A

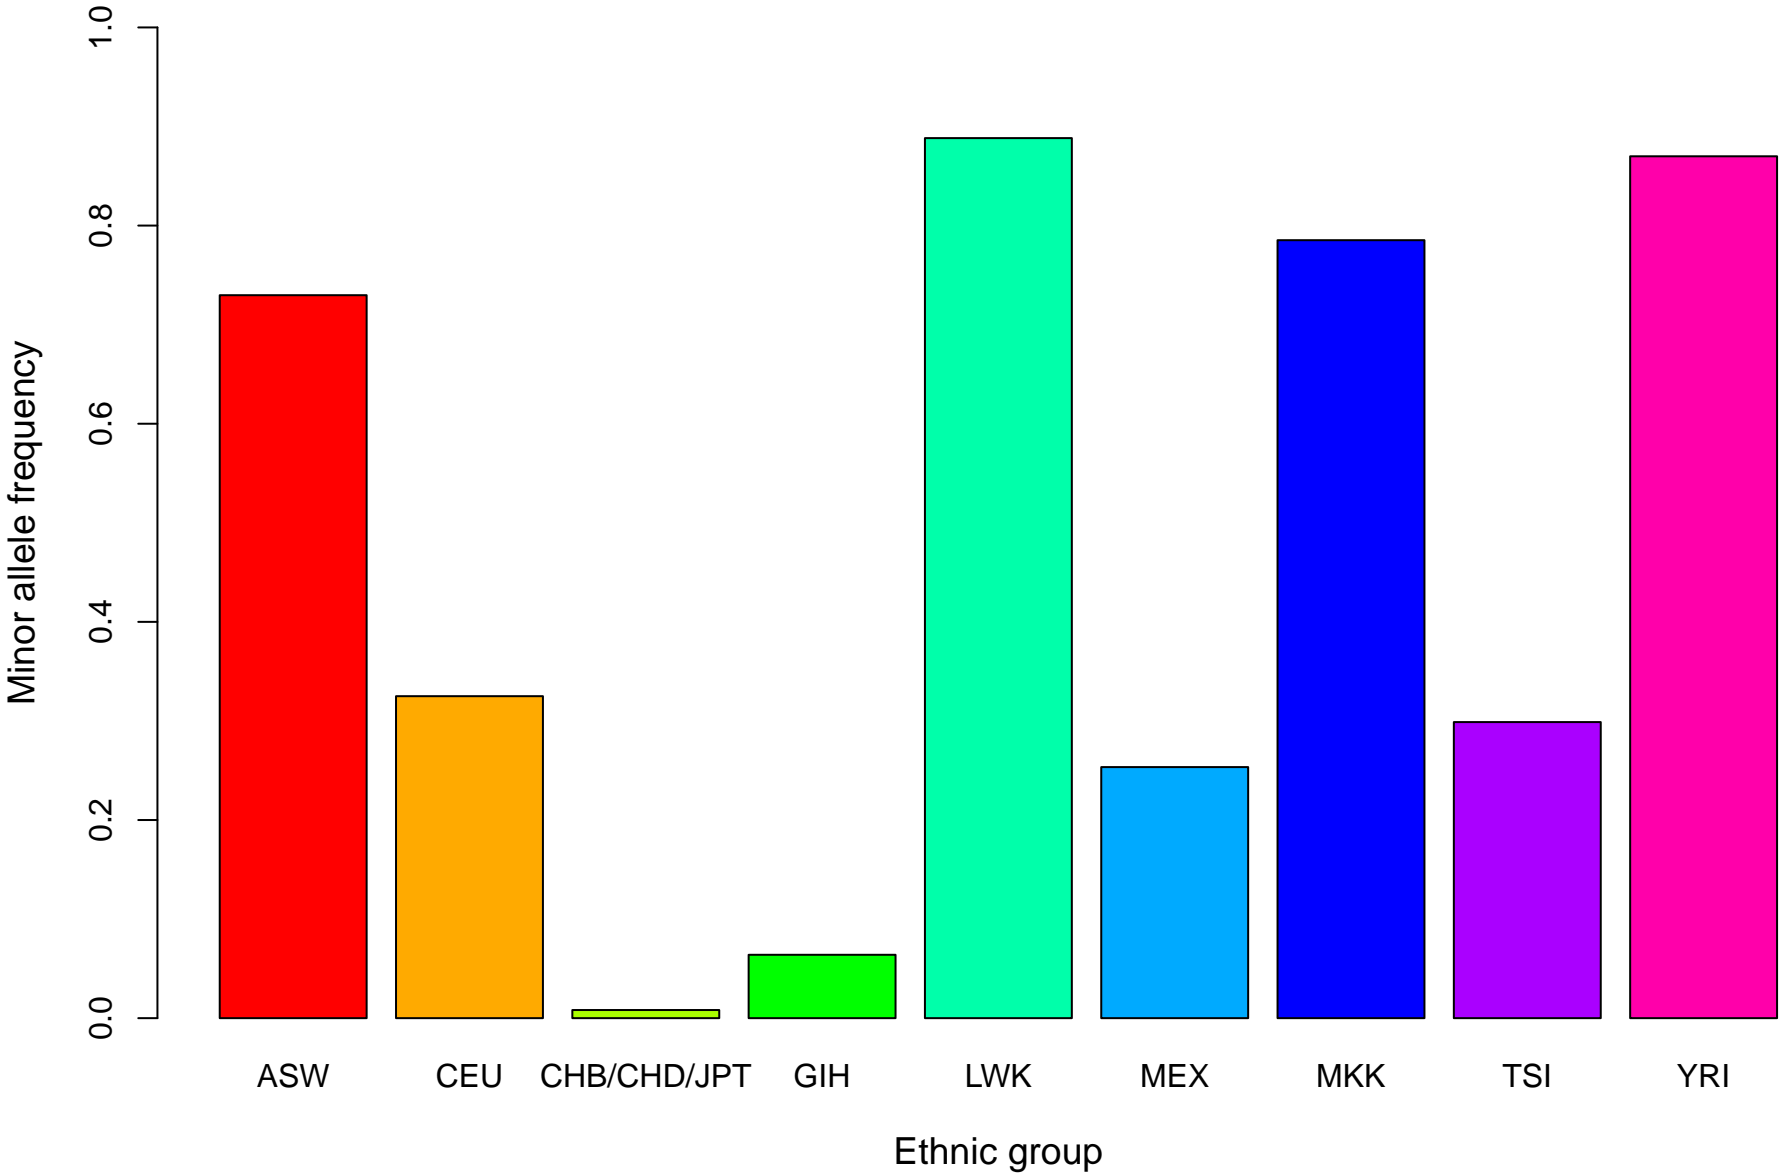

# rs2879382\_G

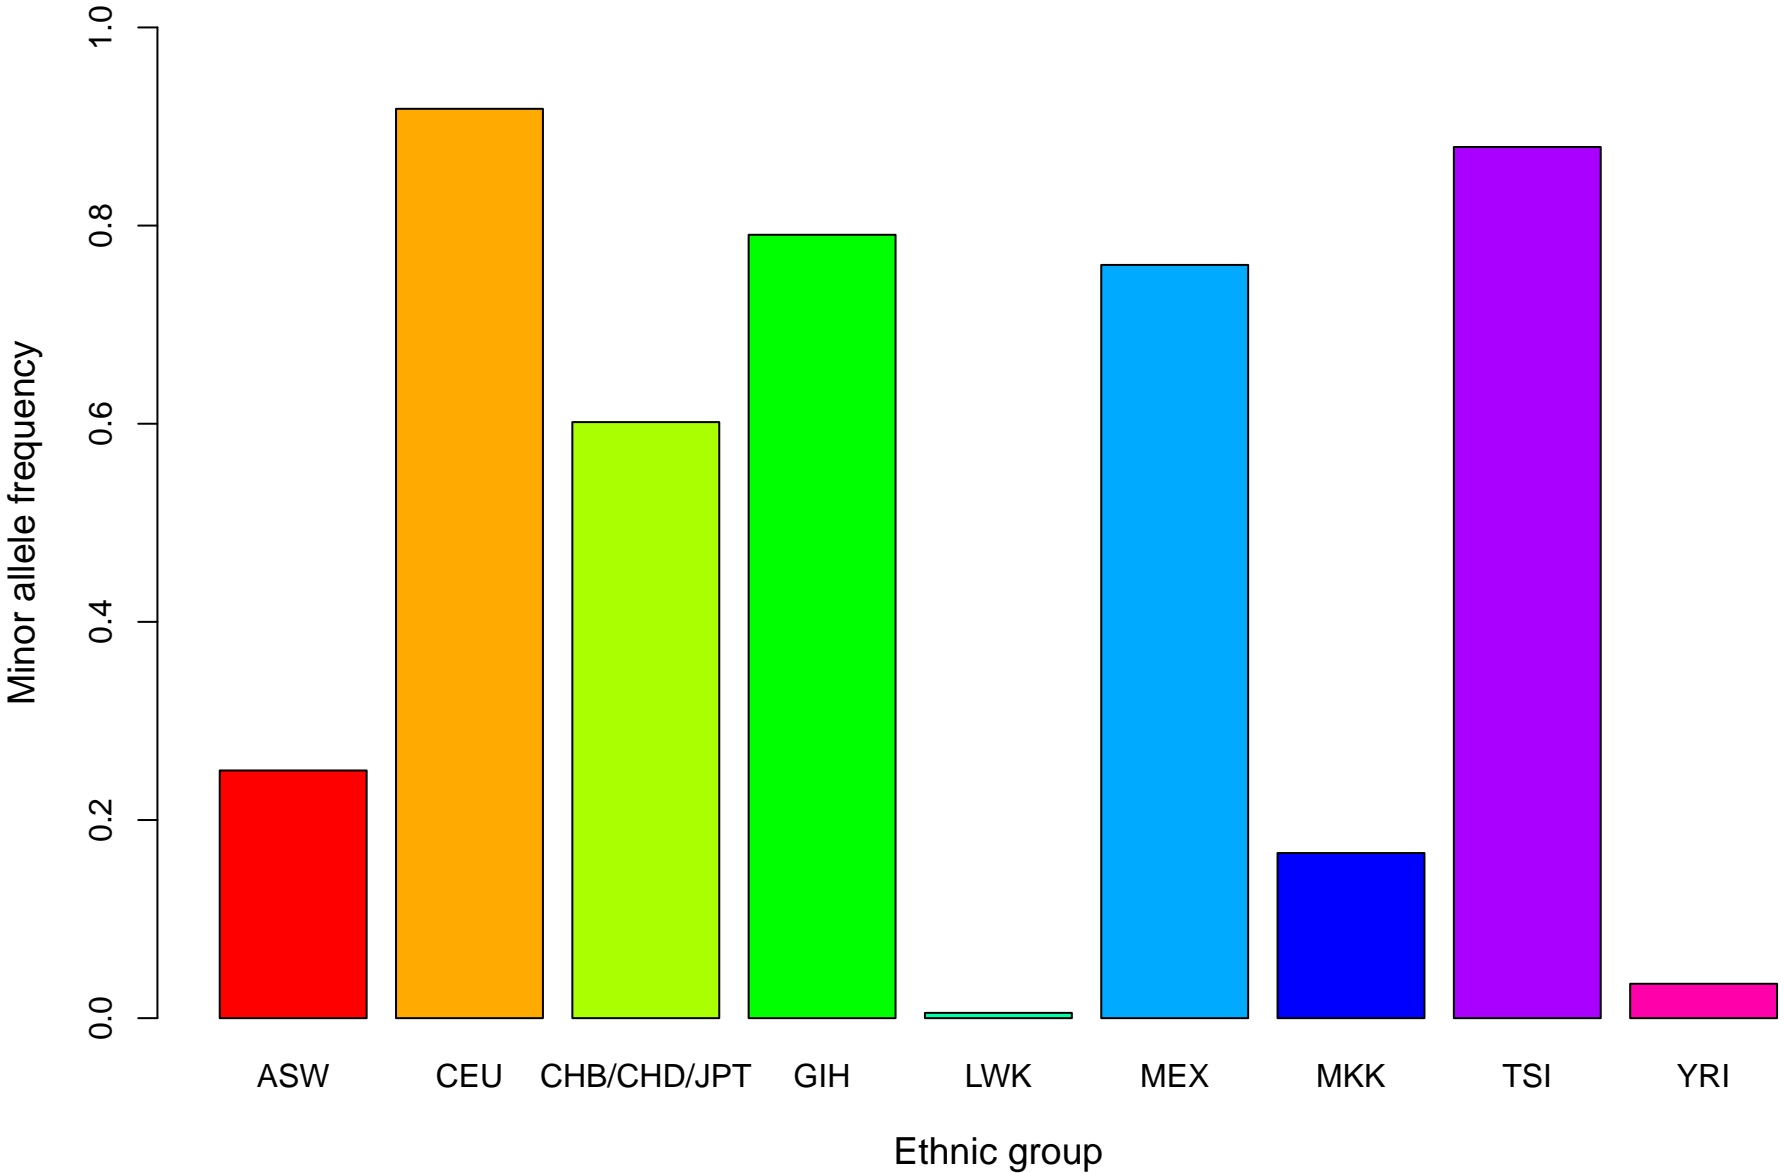



# rs4958701\_A

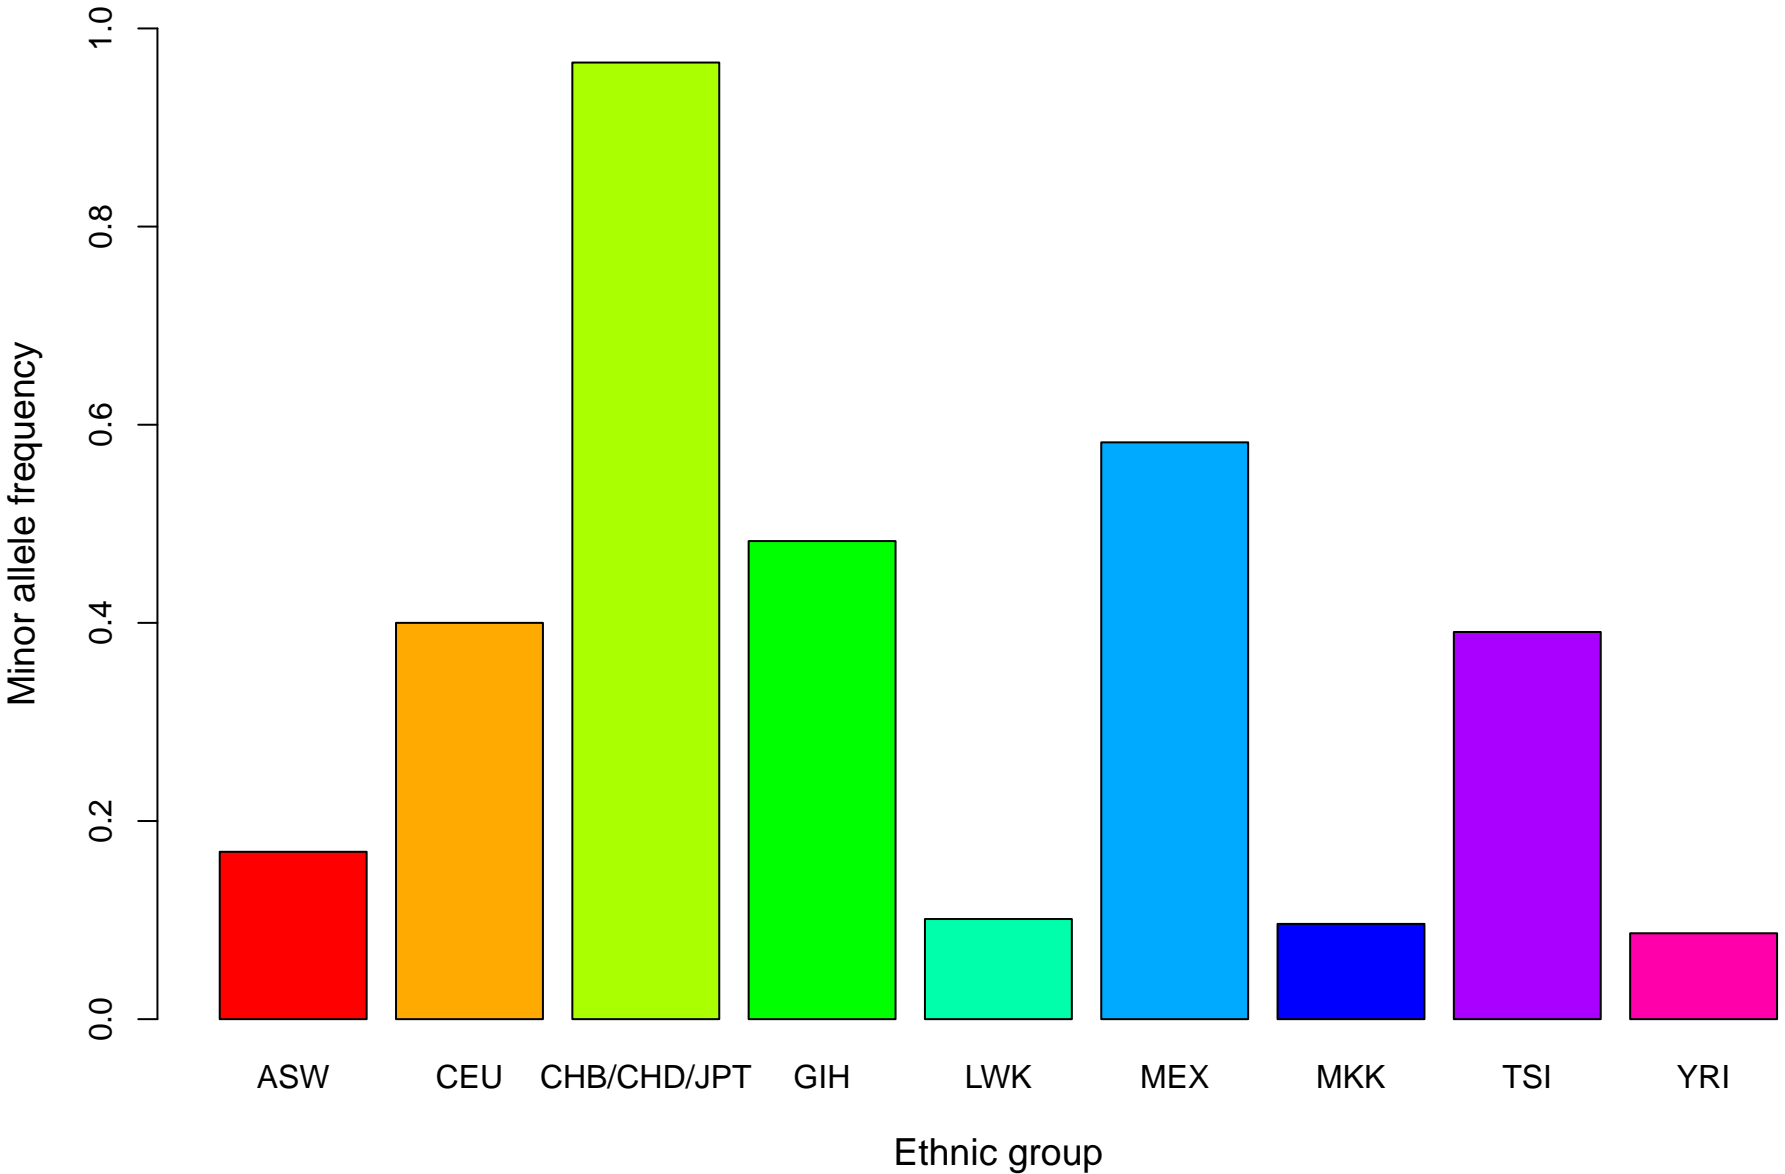

# rs773358\_T

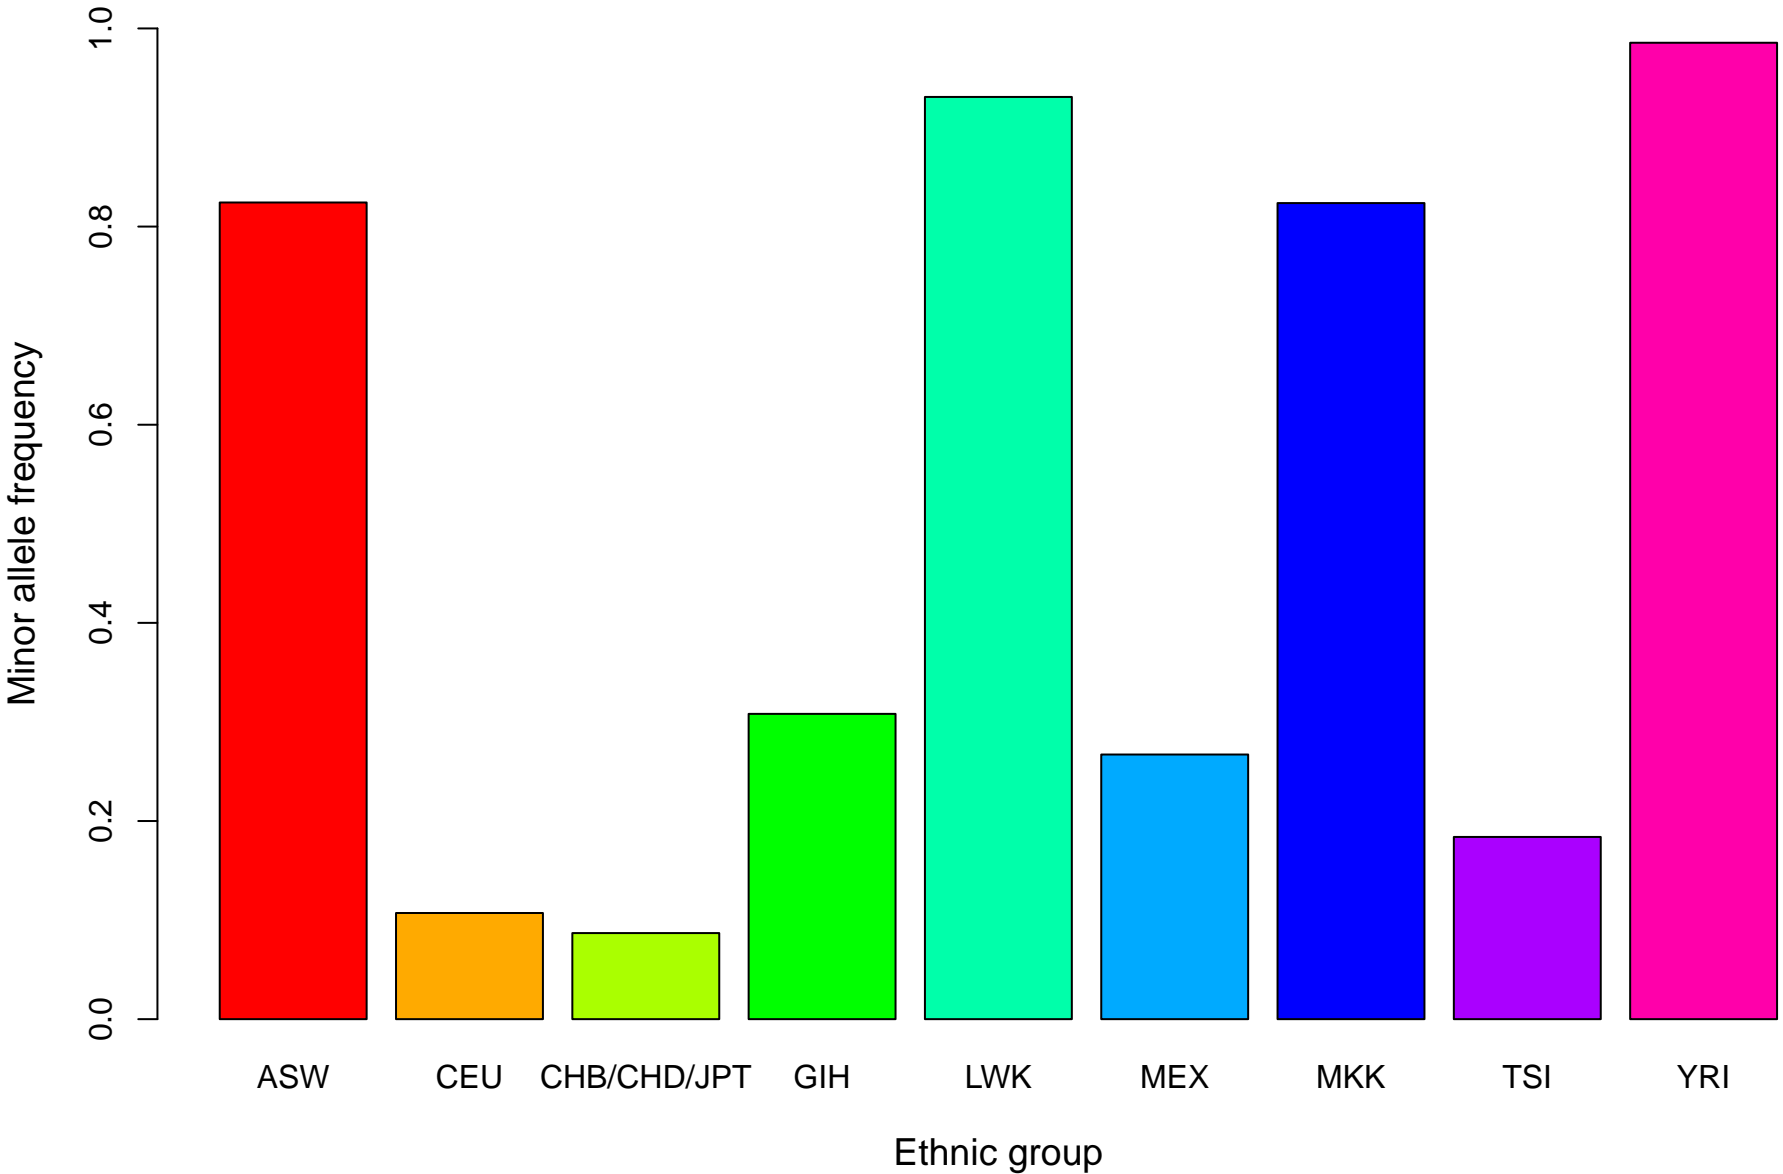

# rs4841471\_A

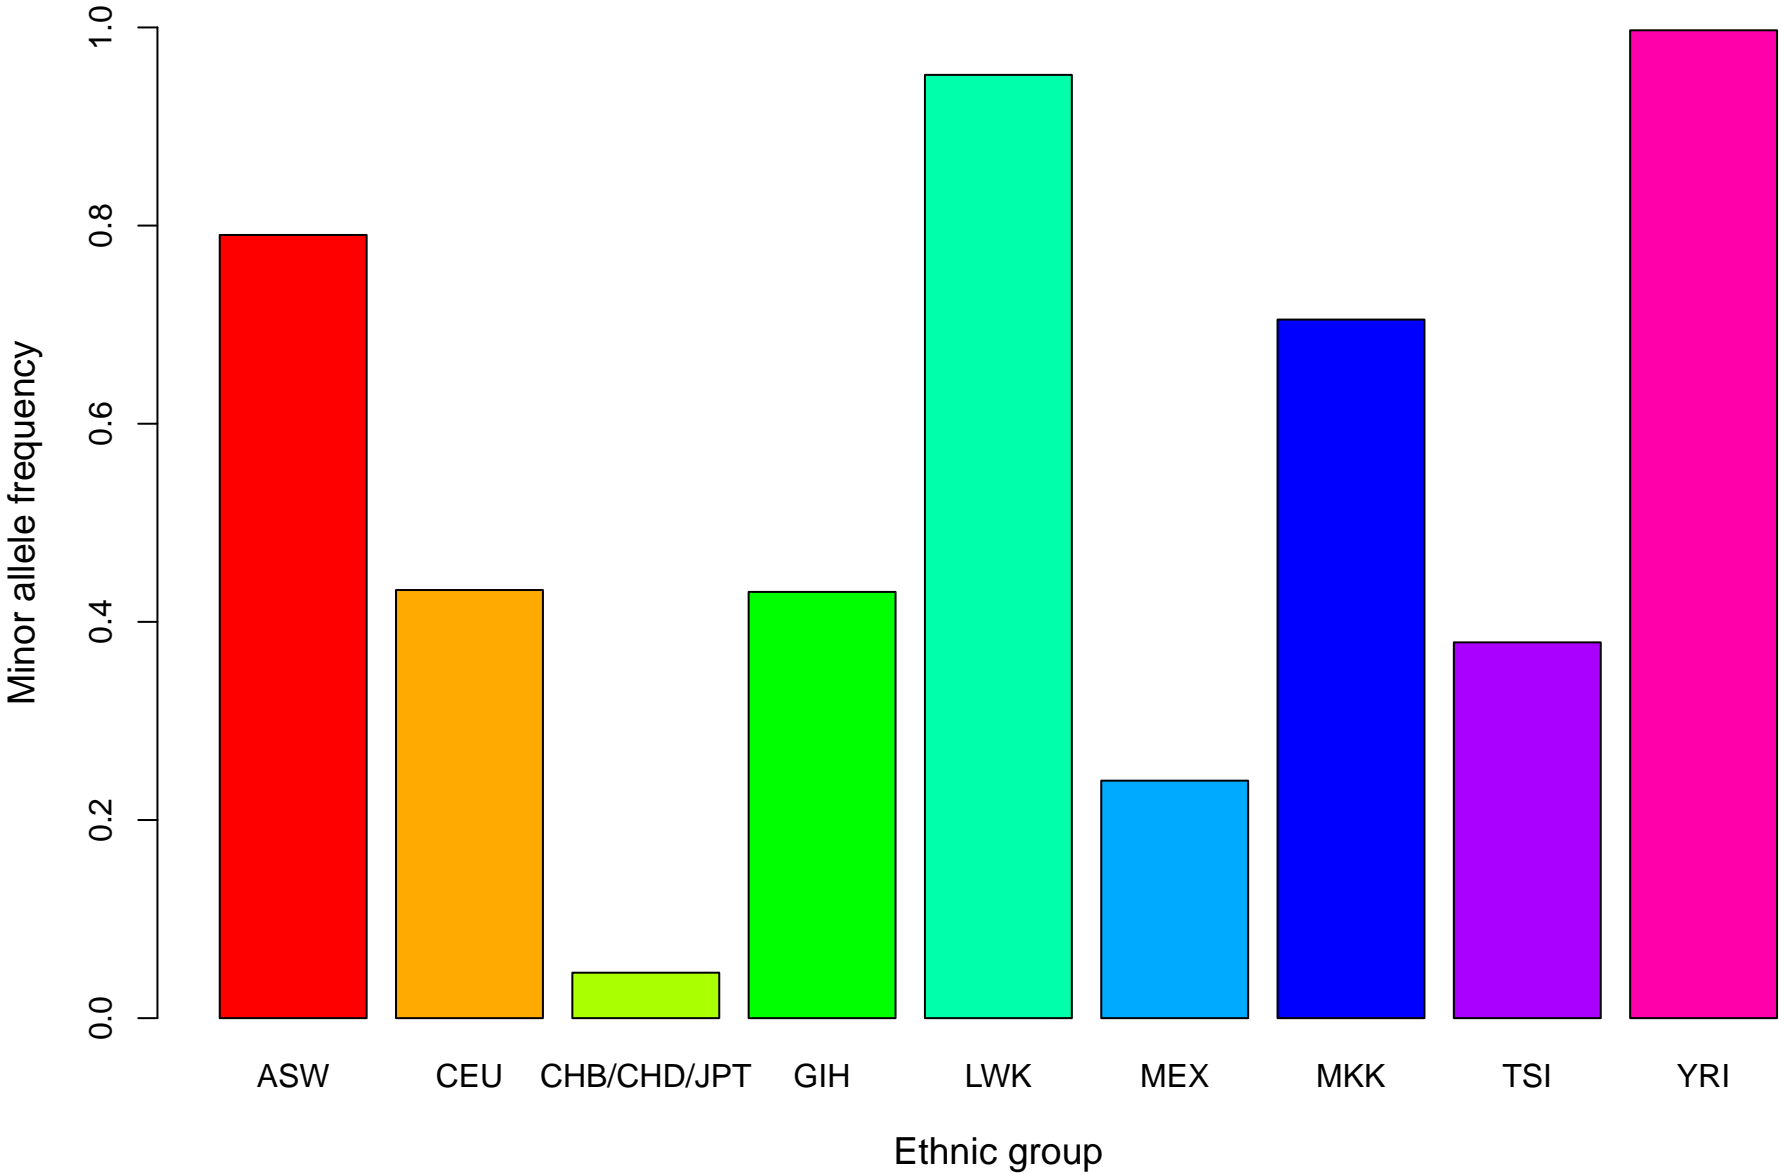

# rs10108139\_C

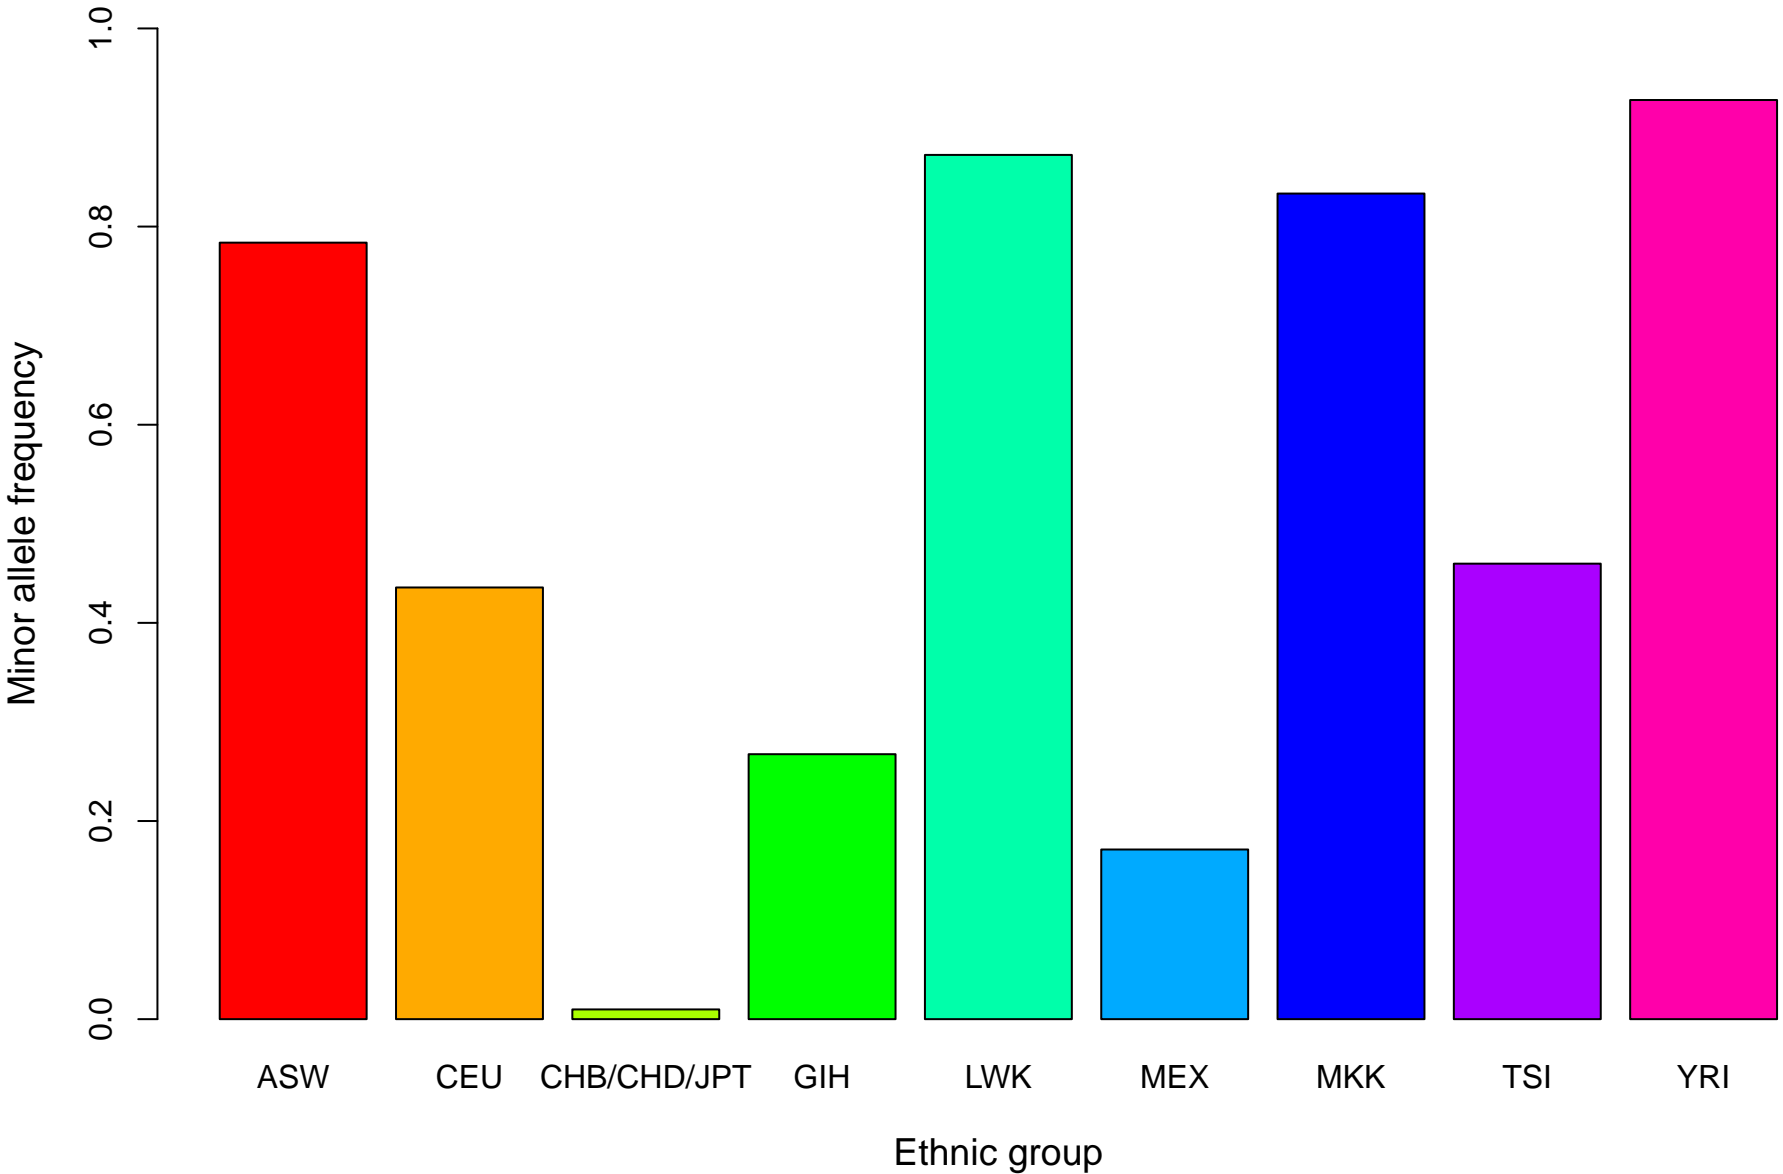

# rs11123717\_A

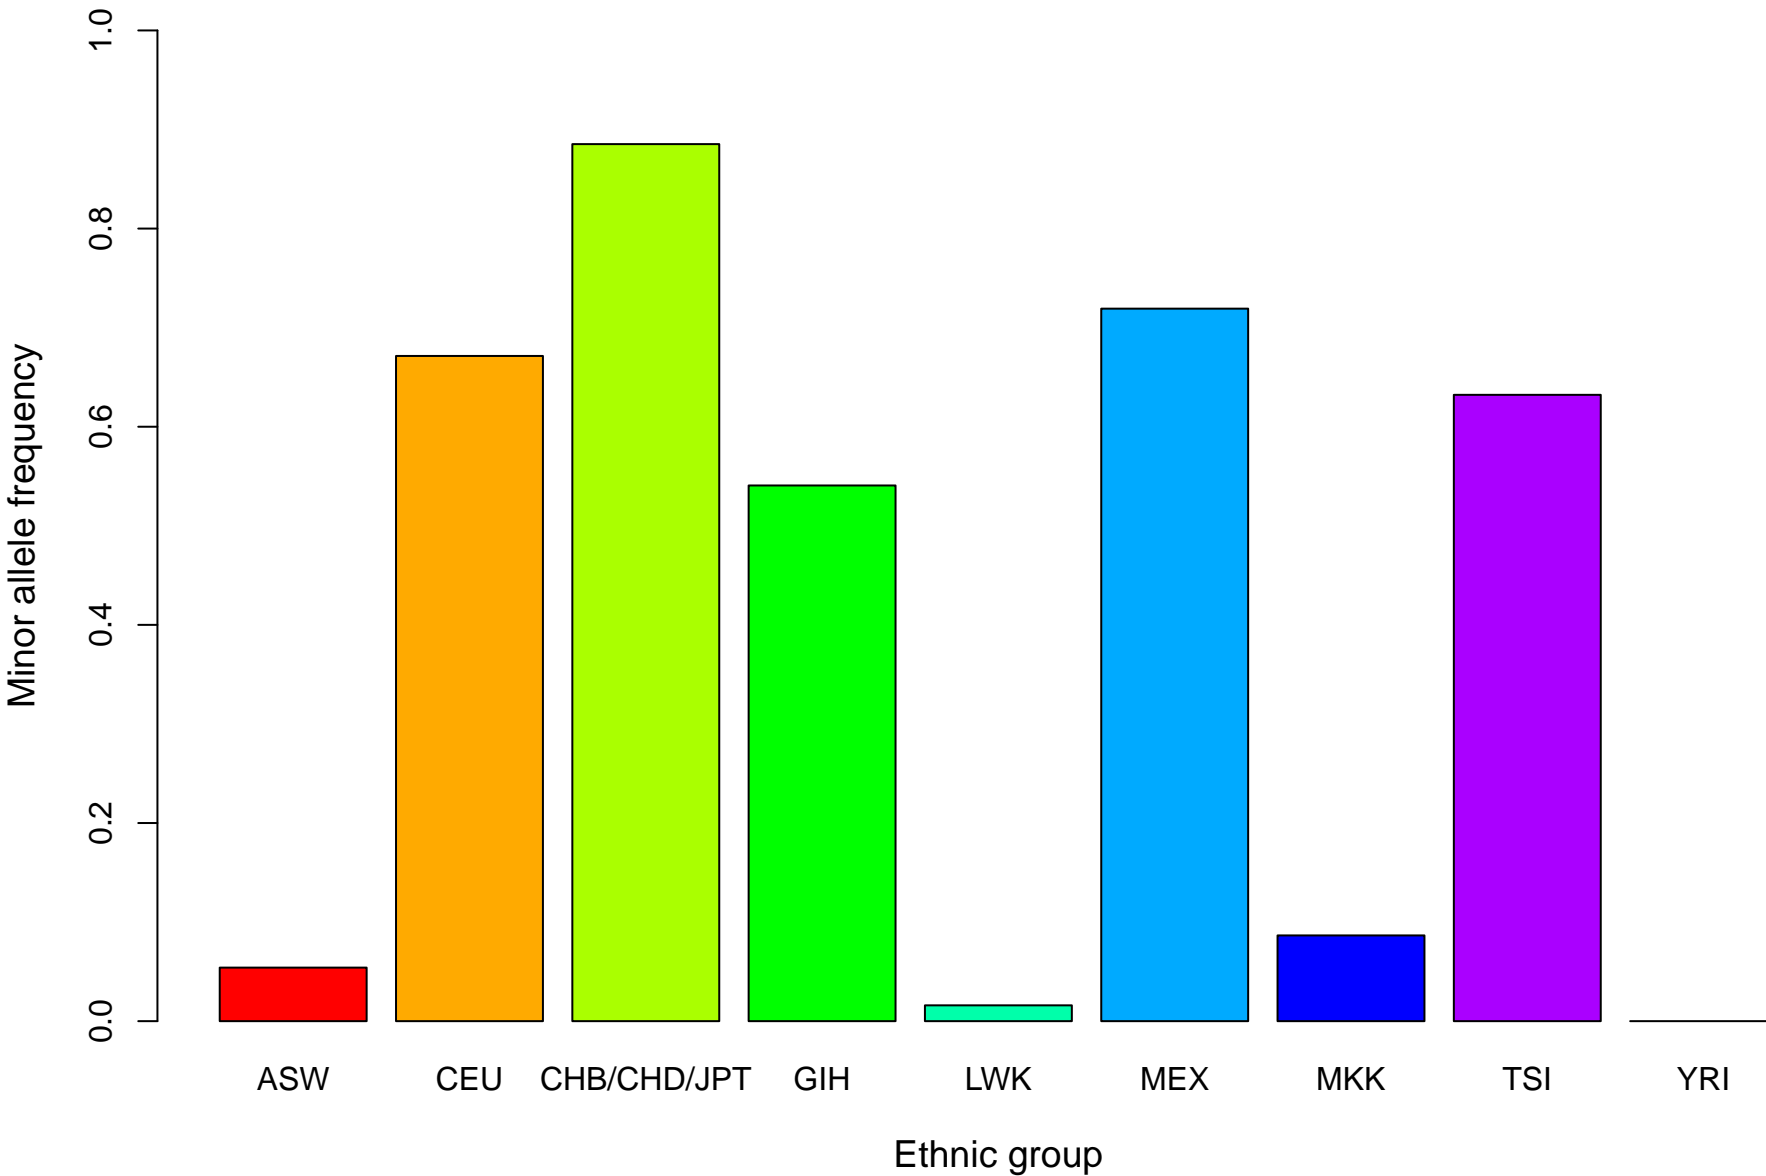

# rs1455739\_A

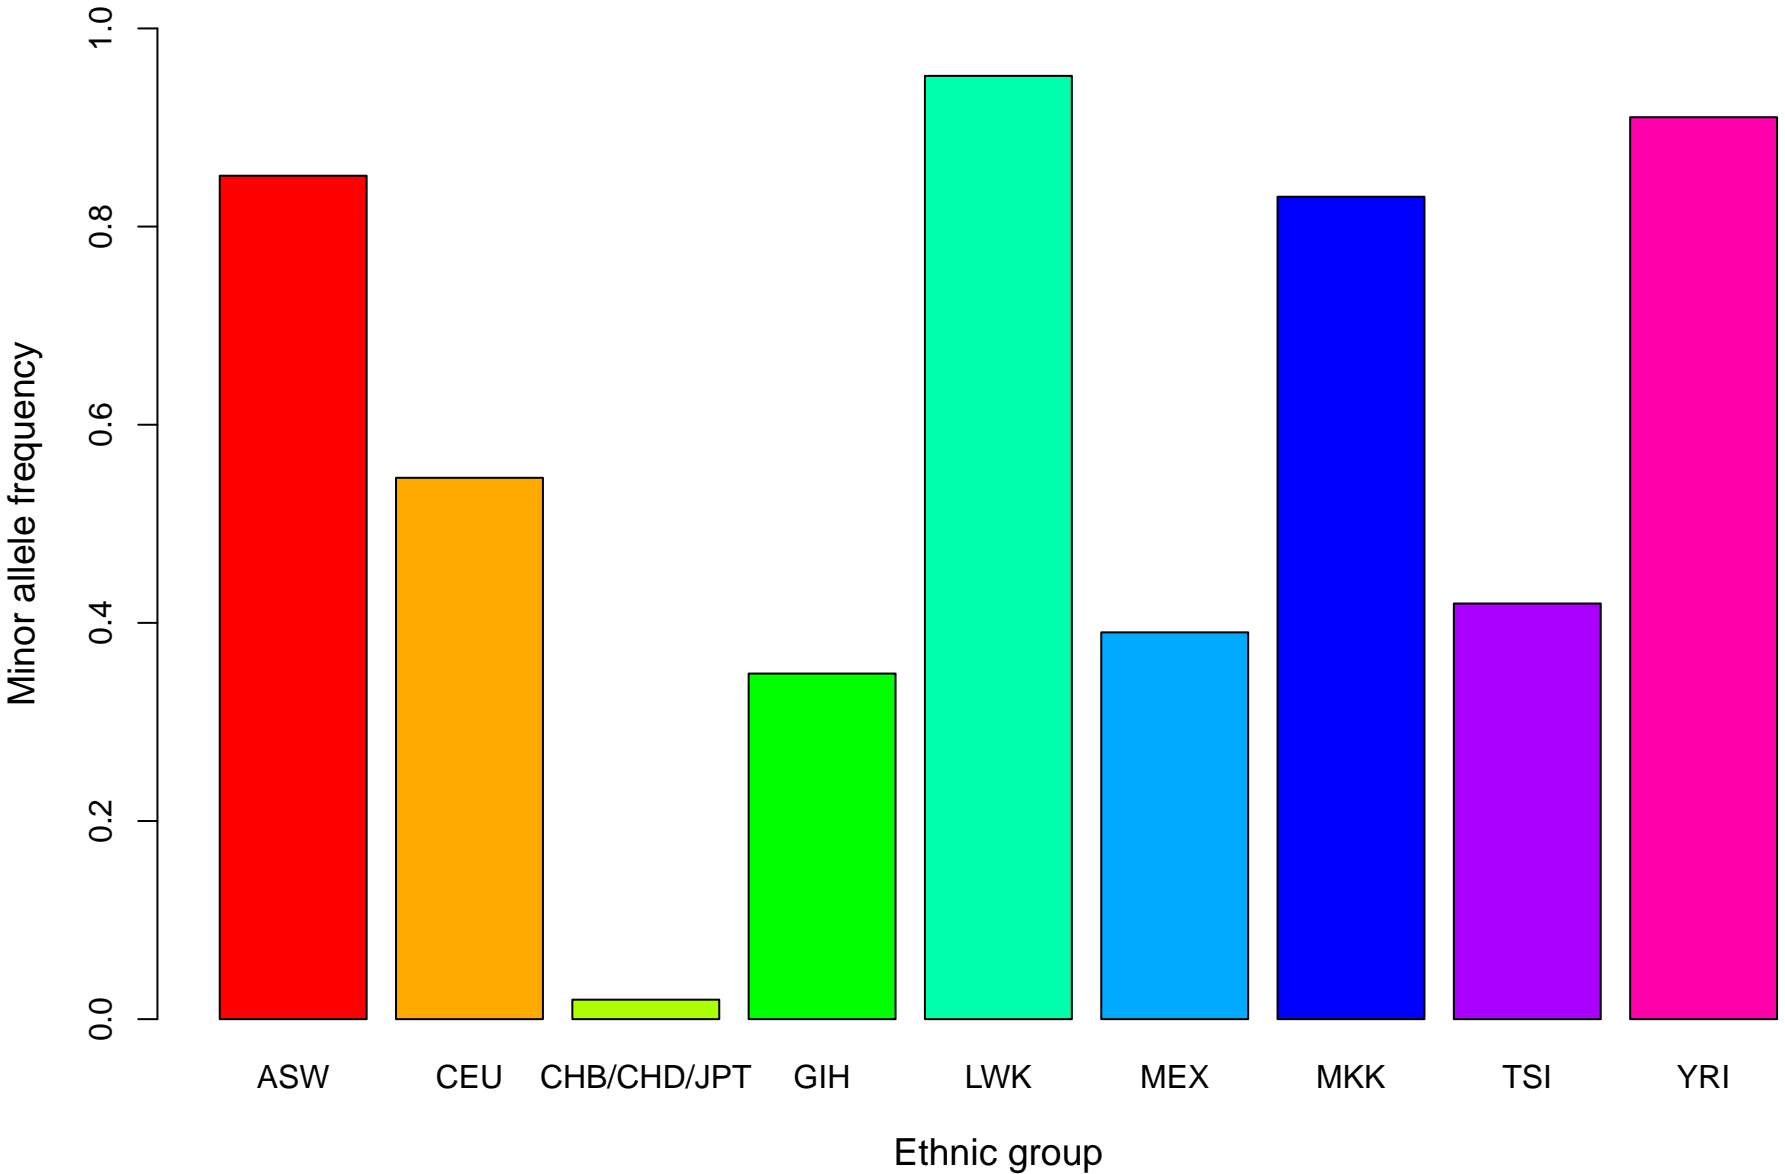

# rs6062808\_G

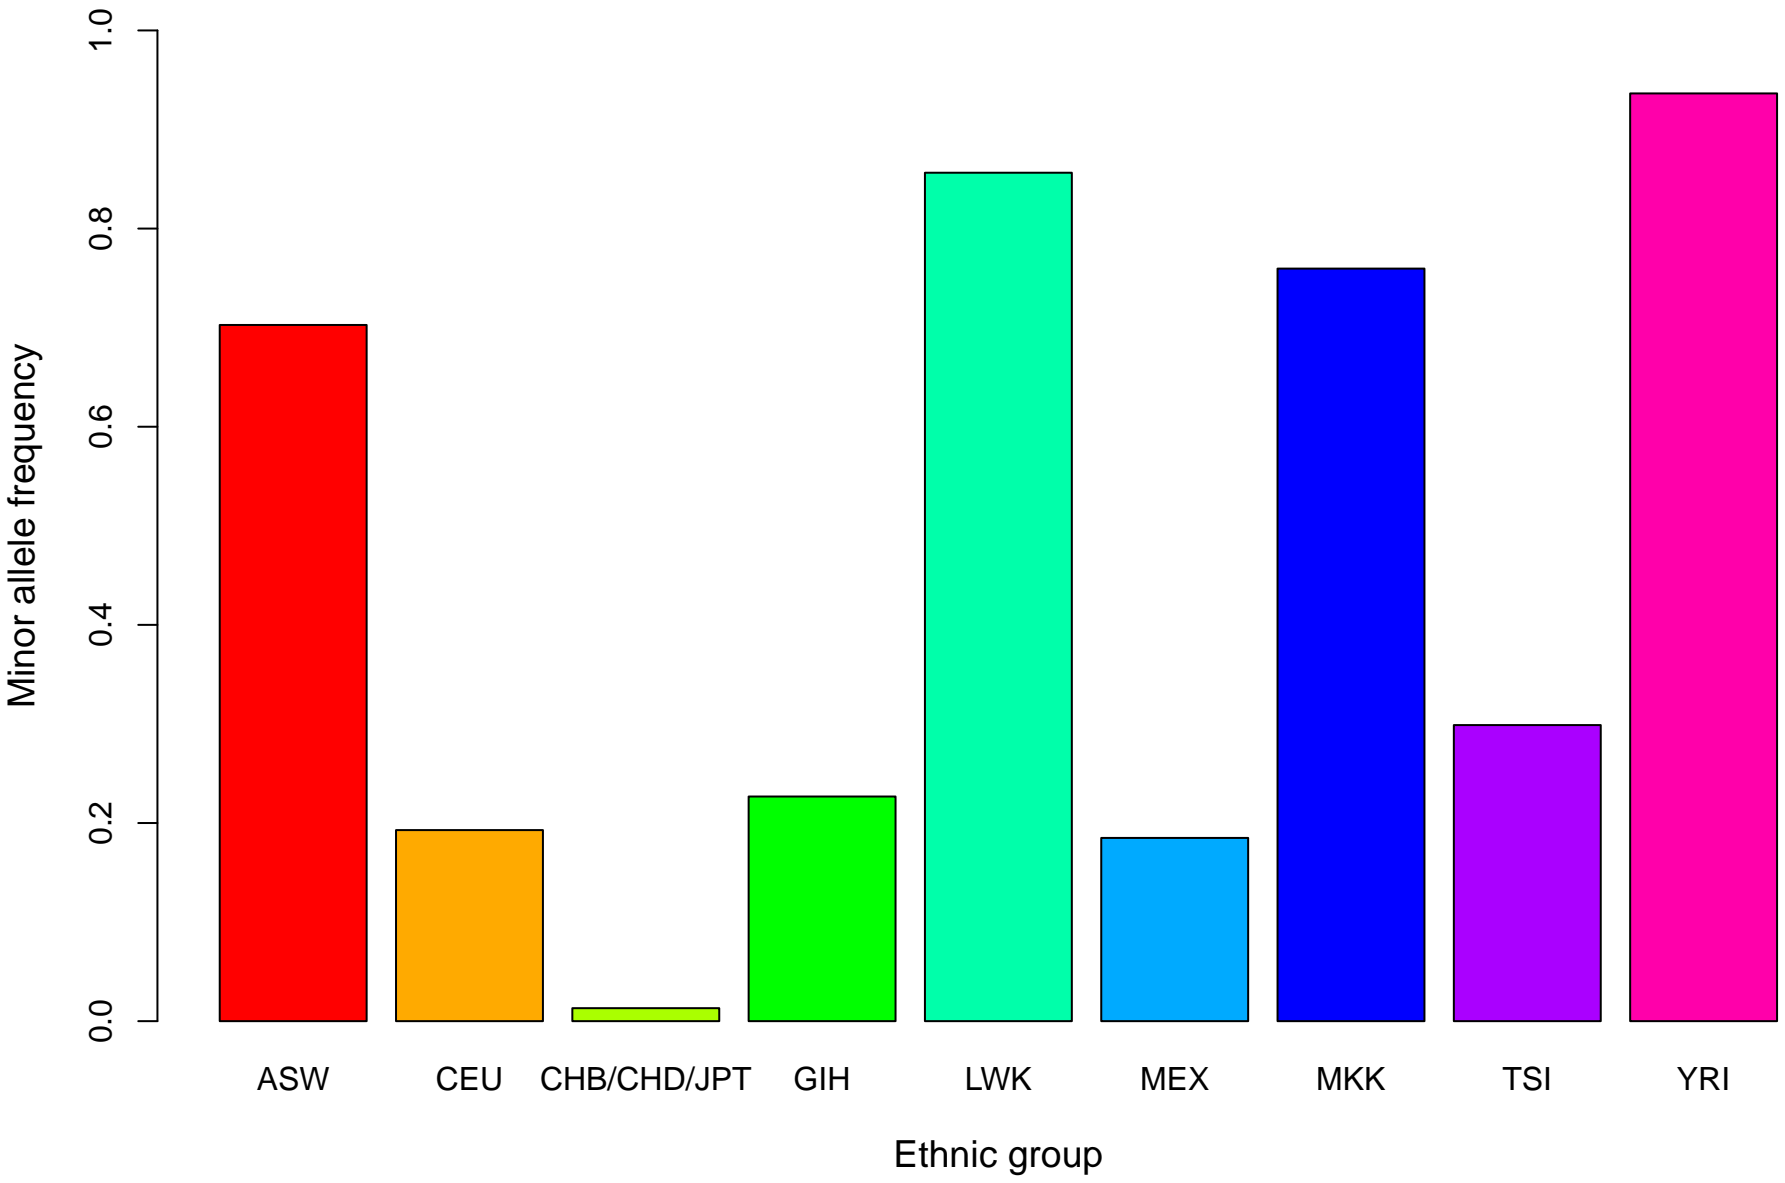

# rs1314014\_G

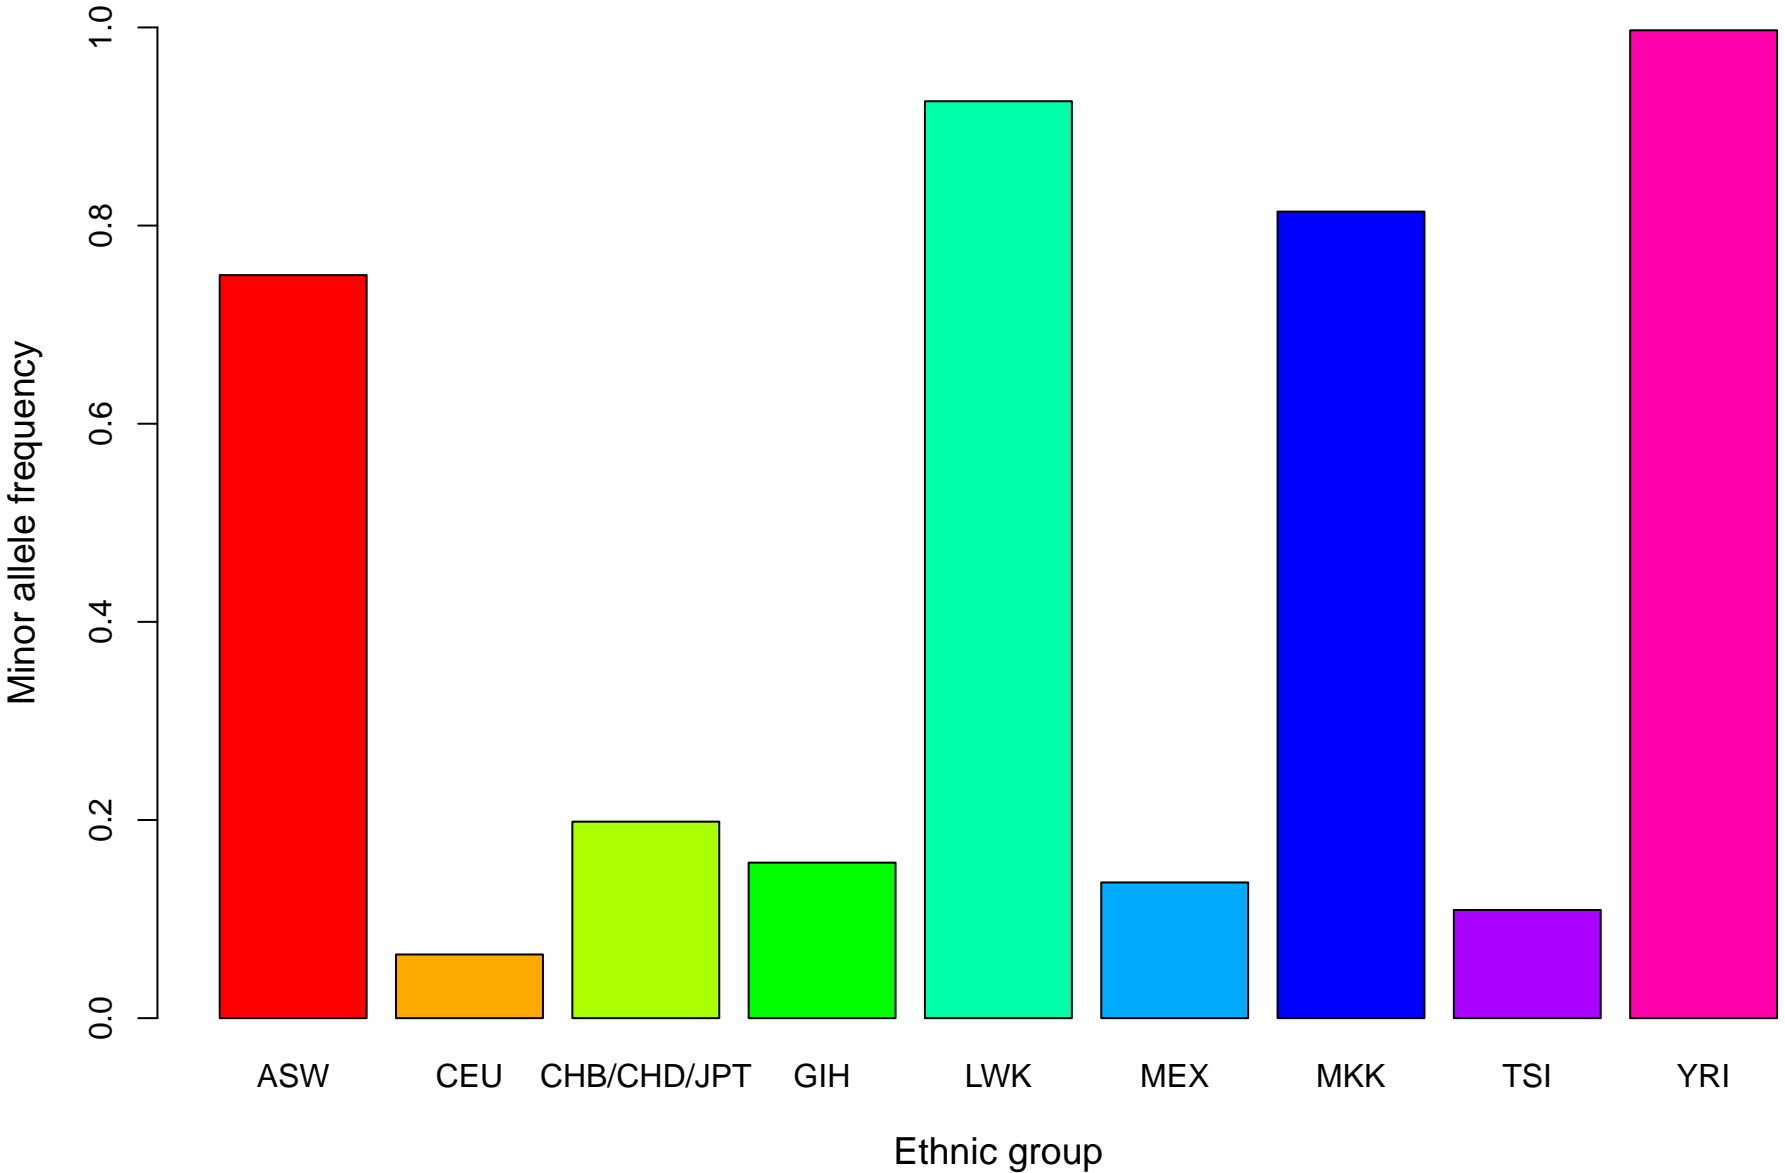



# rs6647531\_A

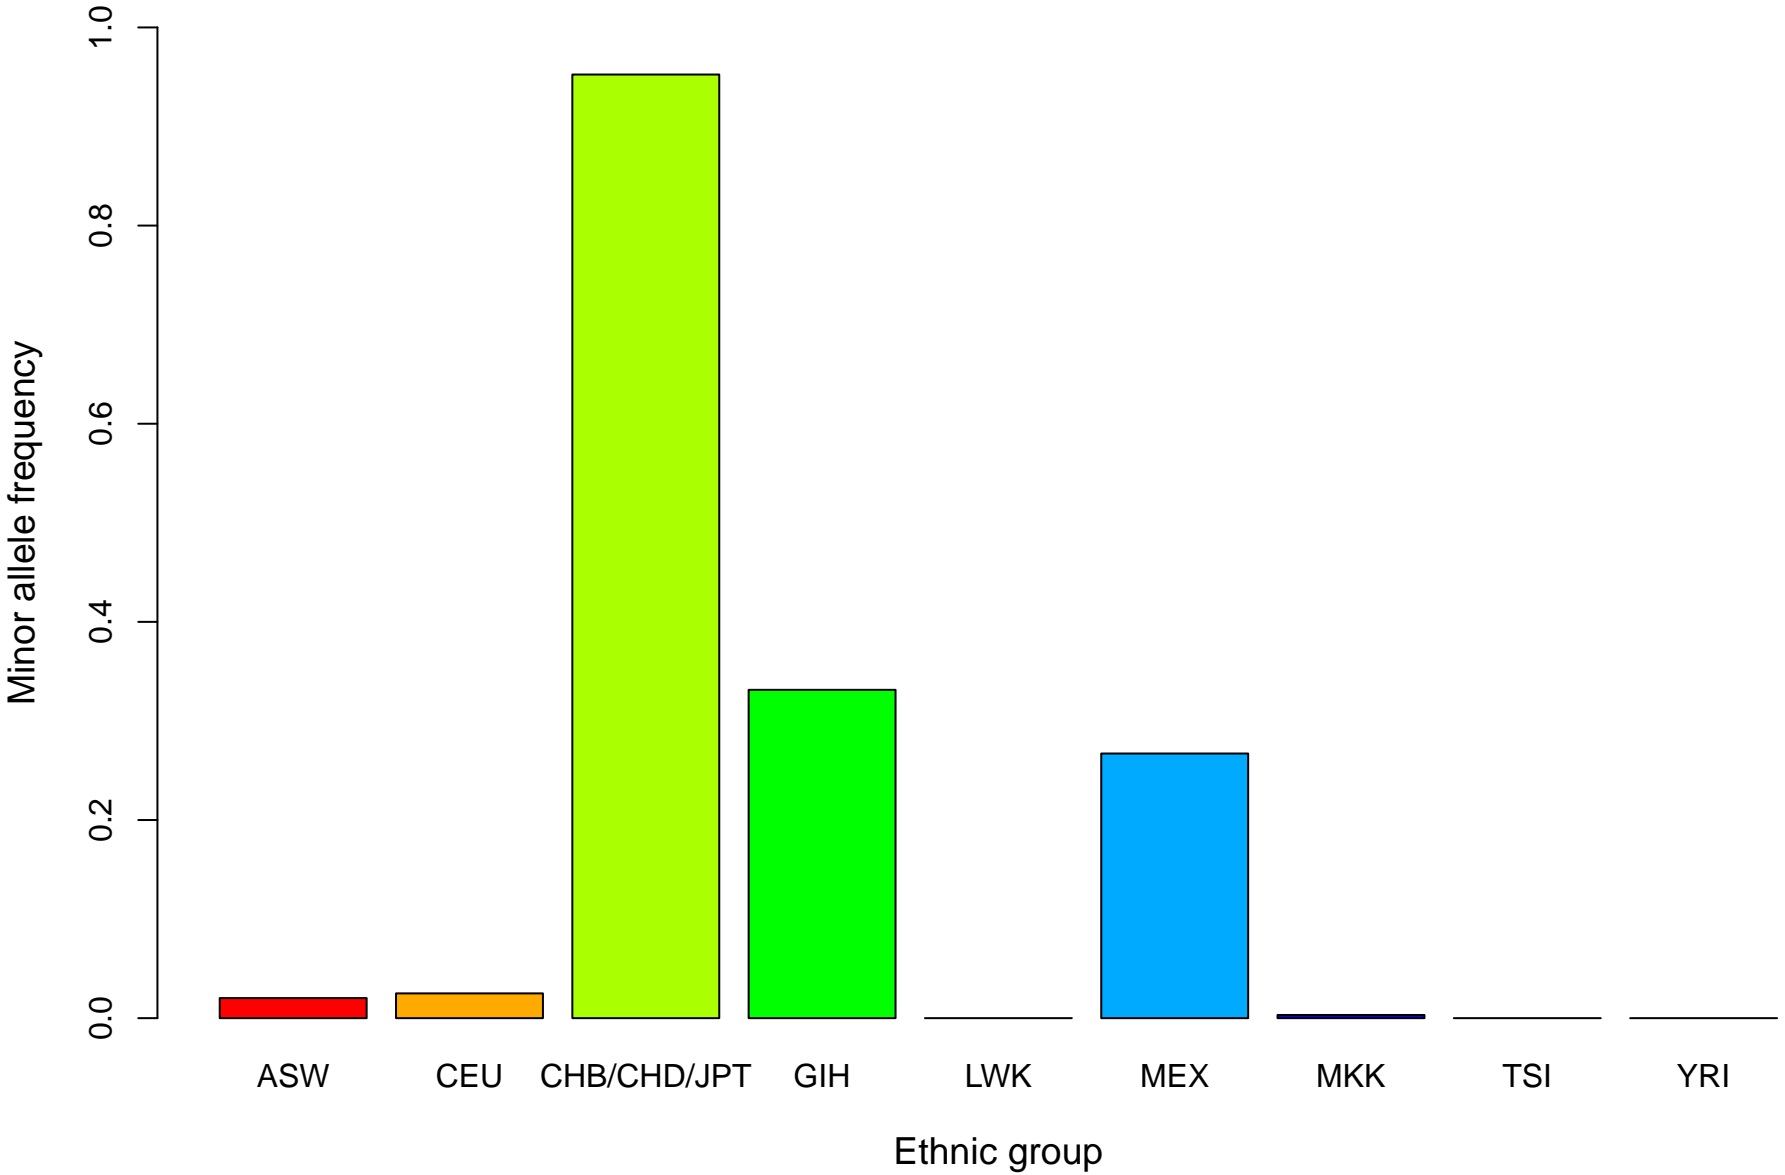

# rs6754888\_A

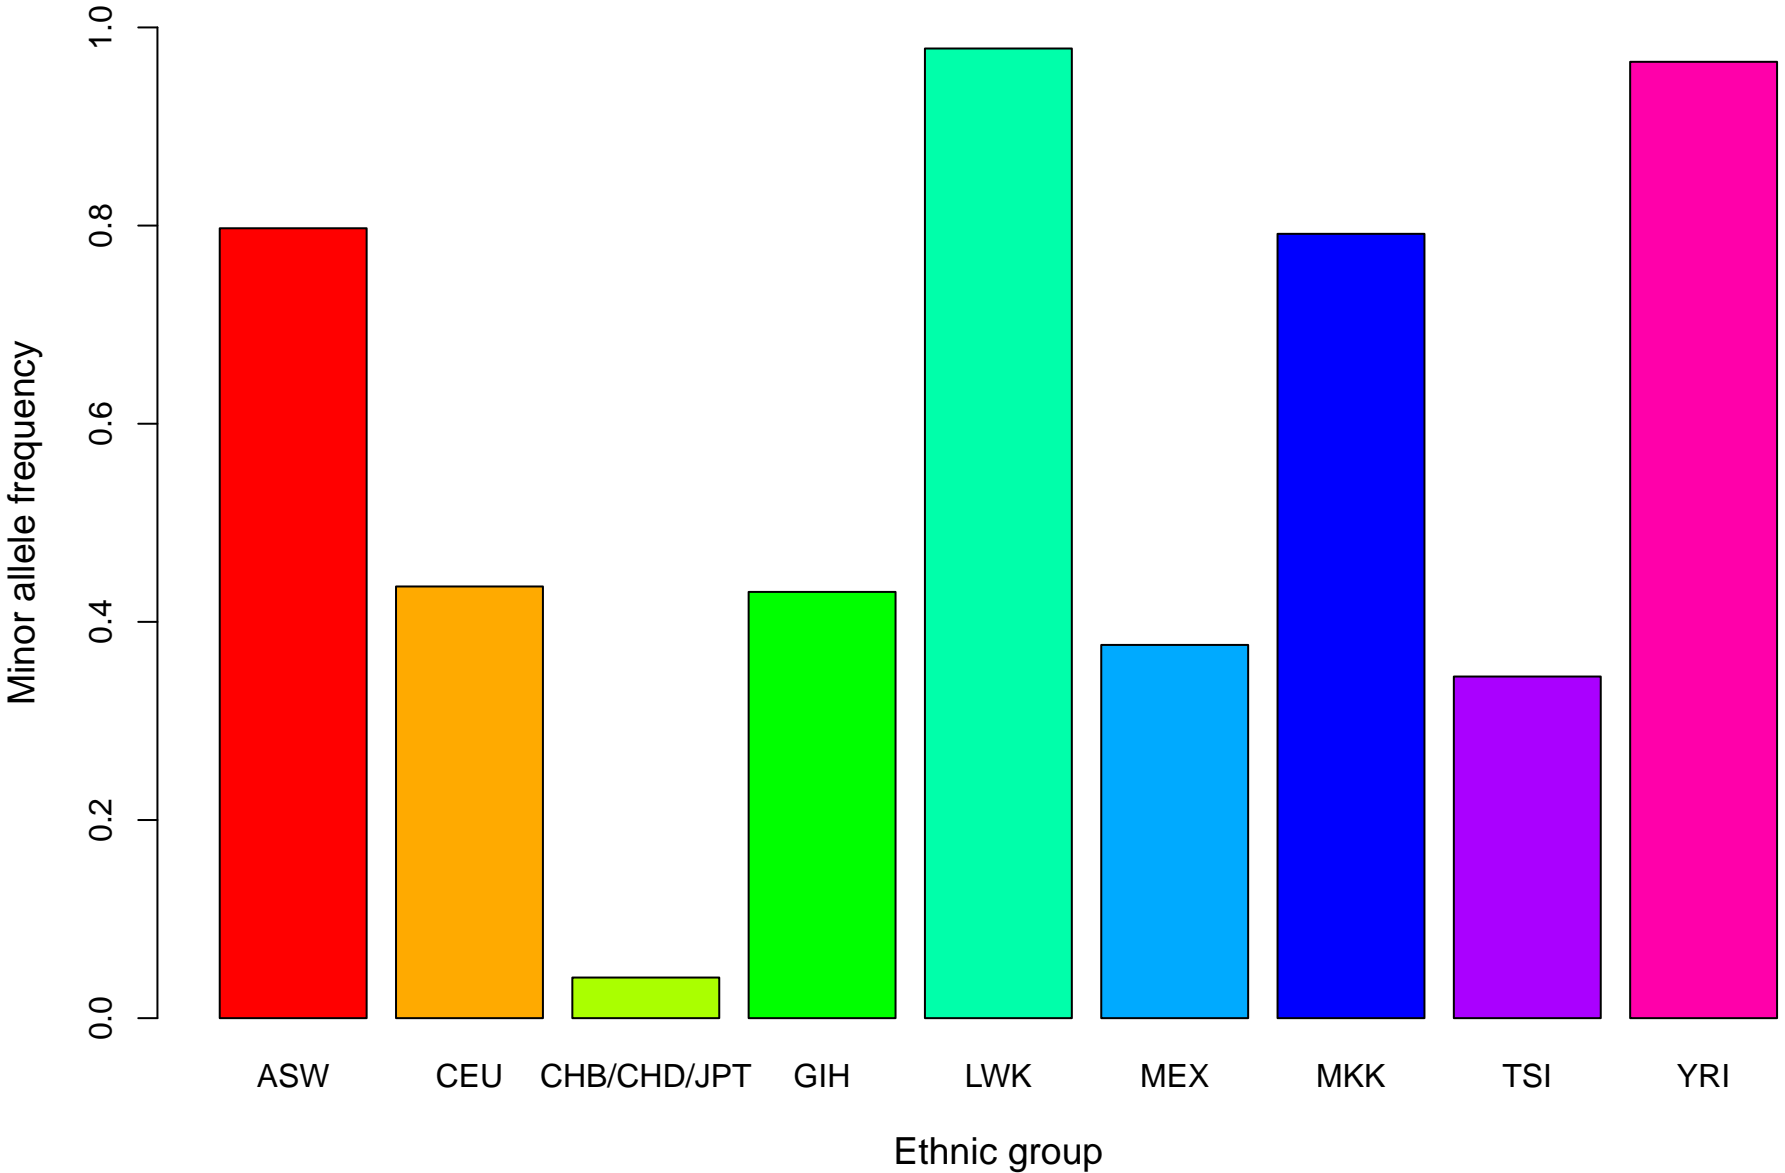

# rs713356\_G

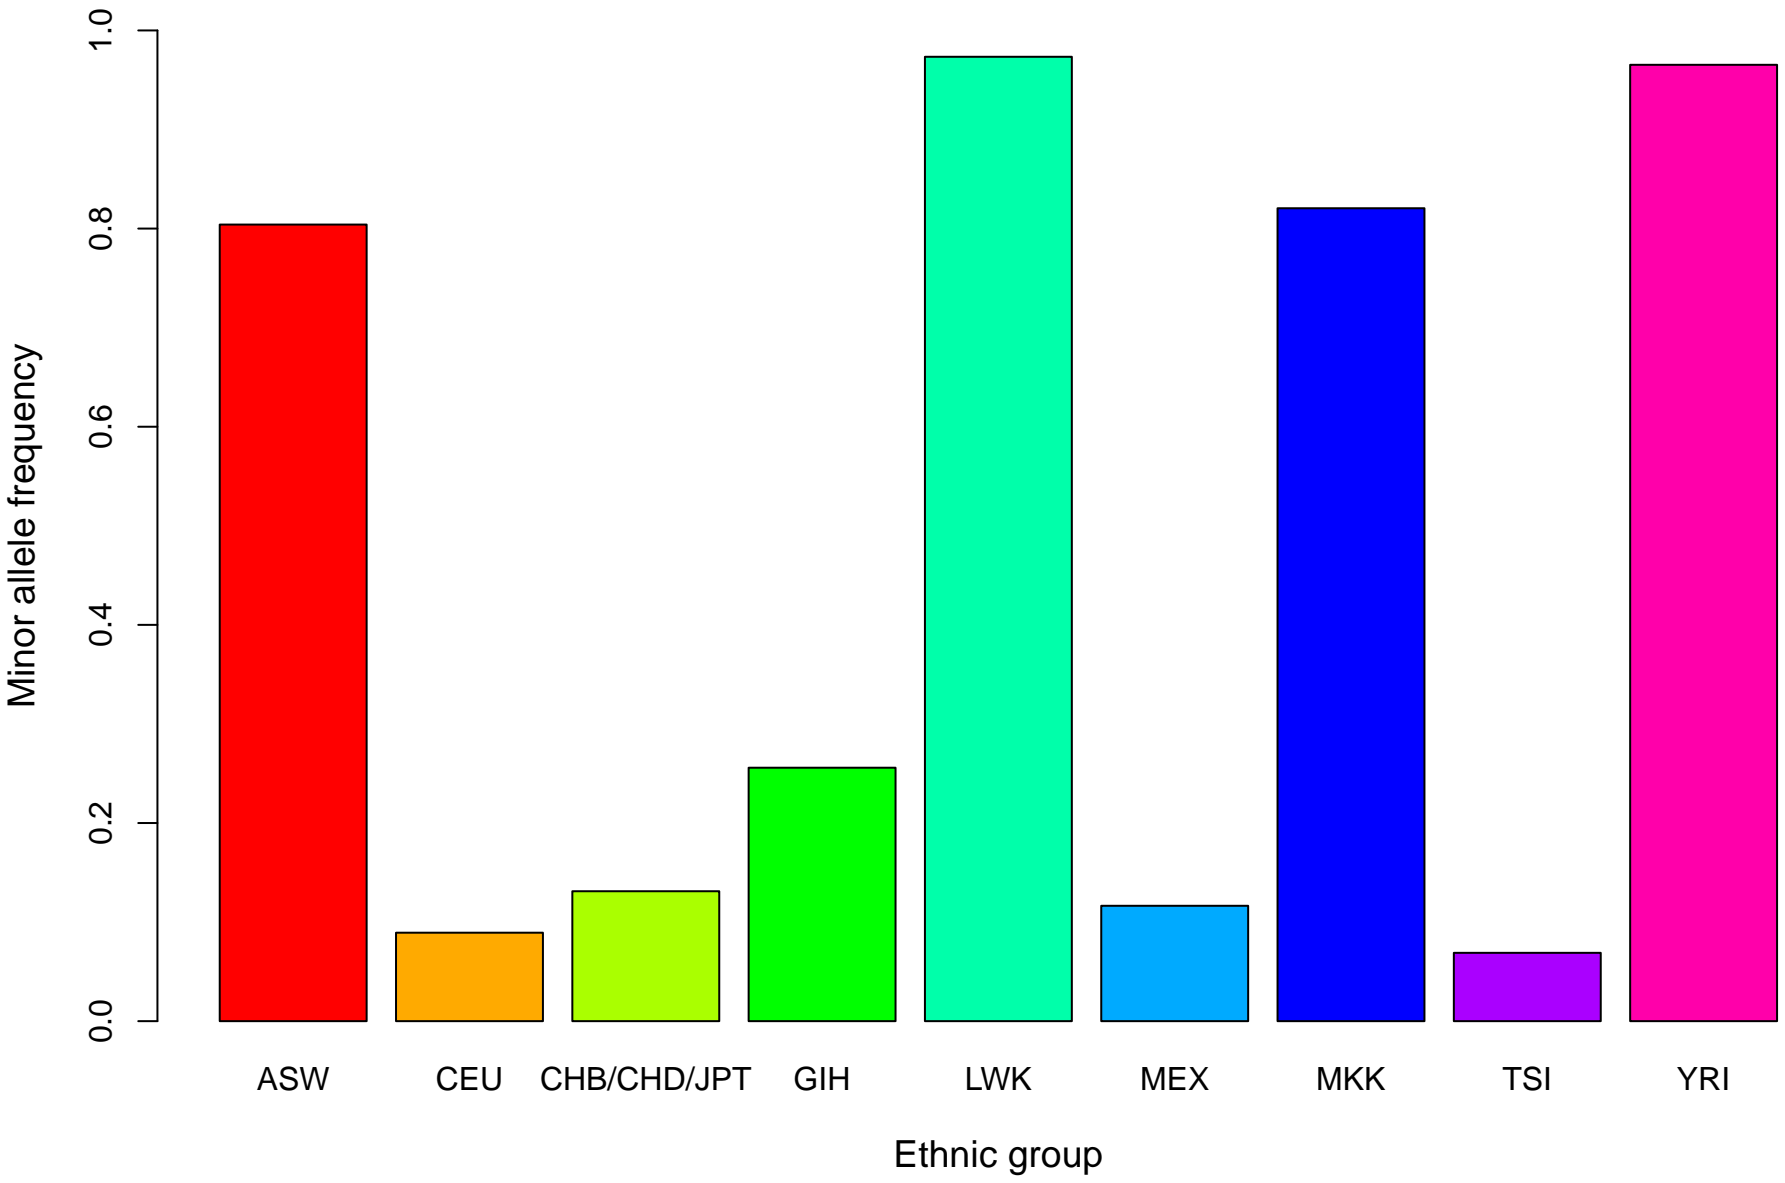

# rs2940479\_A

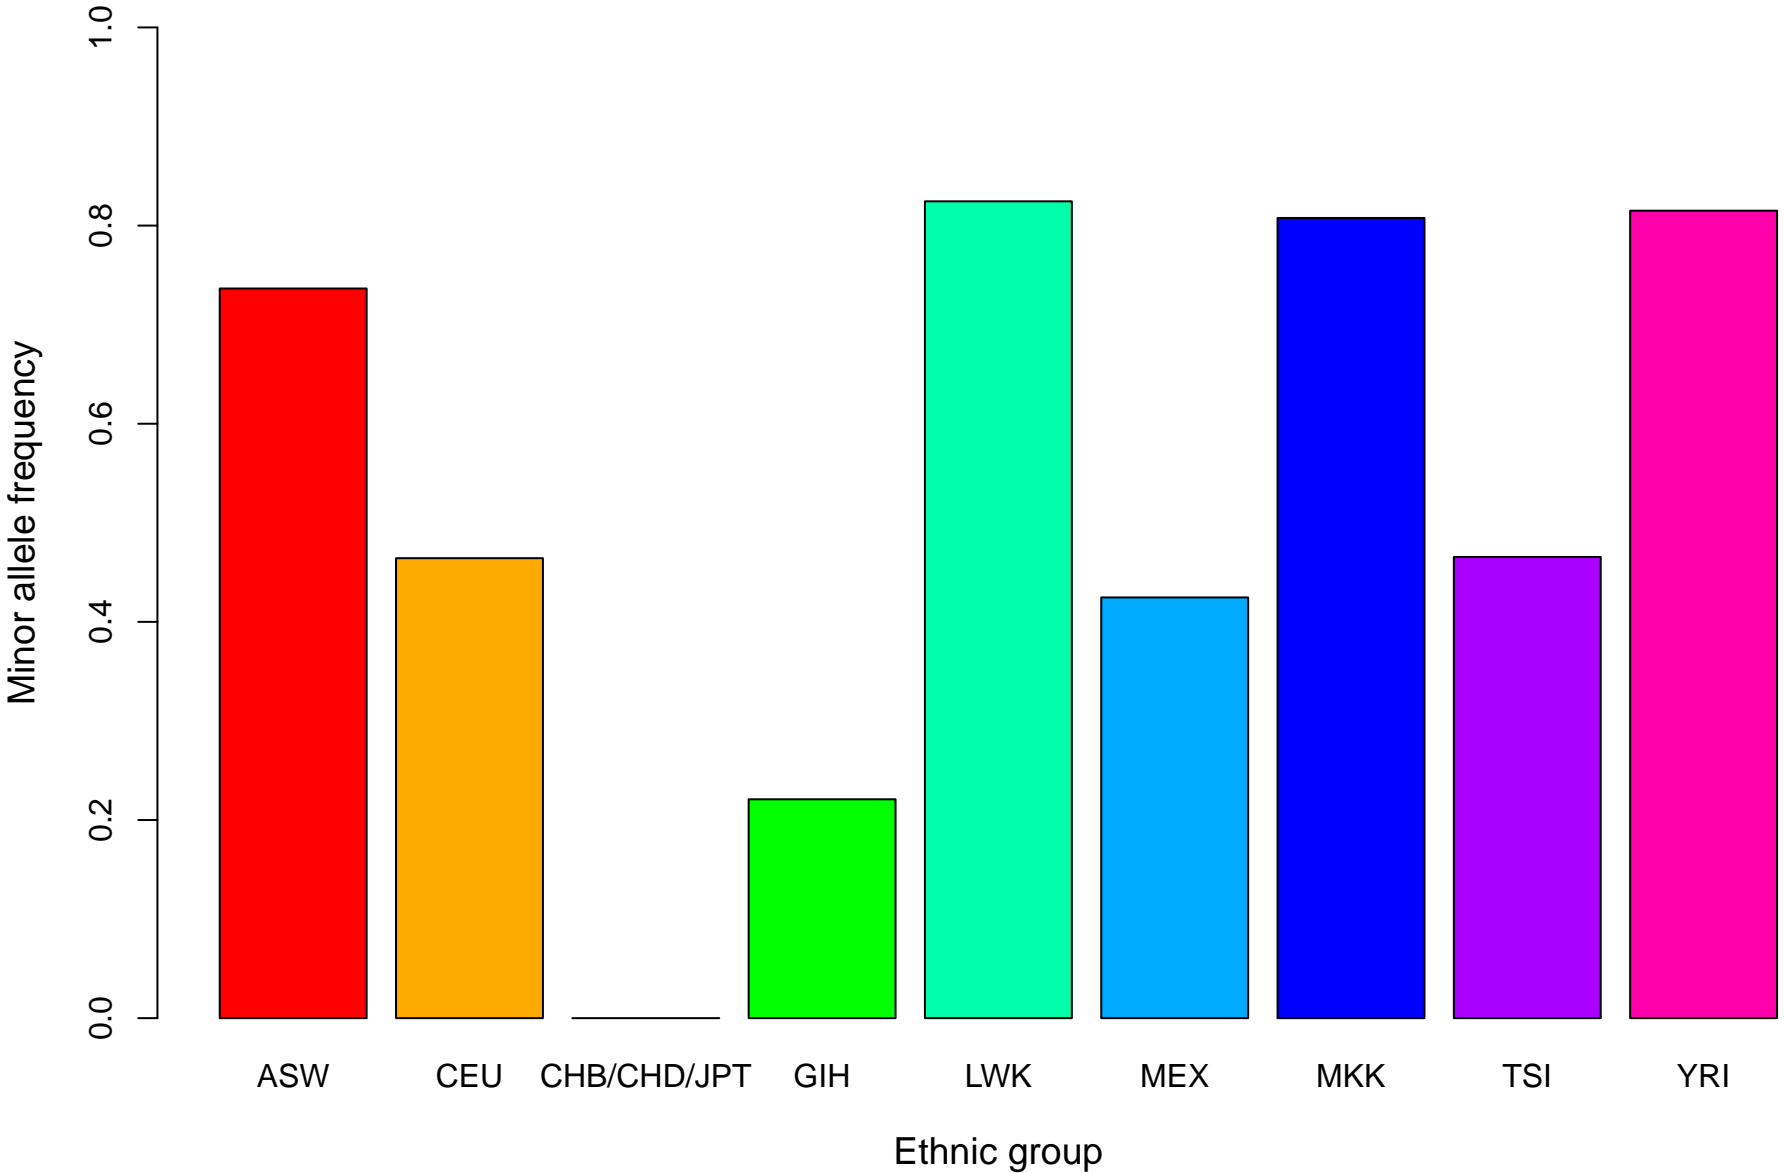

# rs7624647\_A

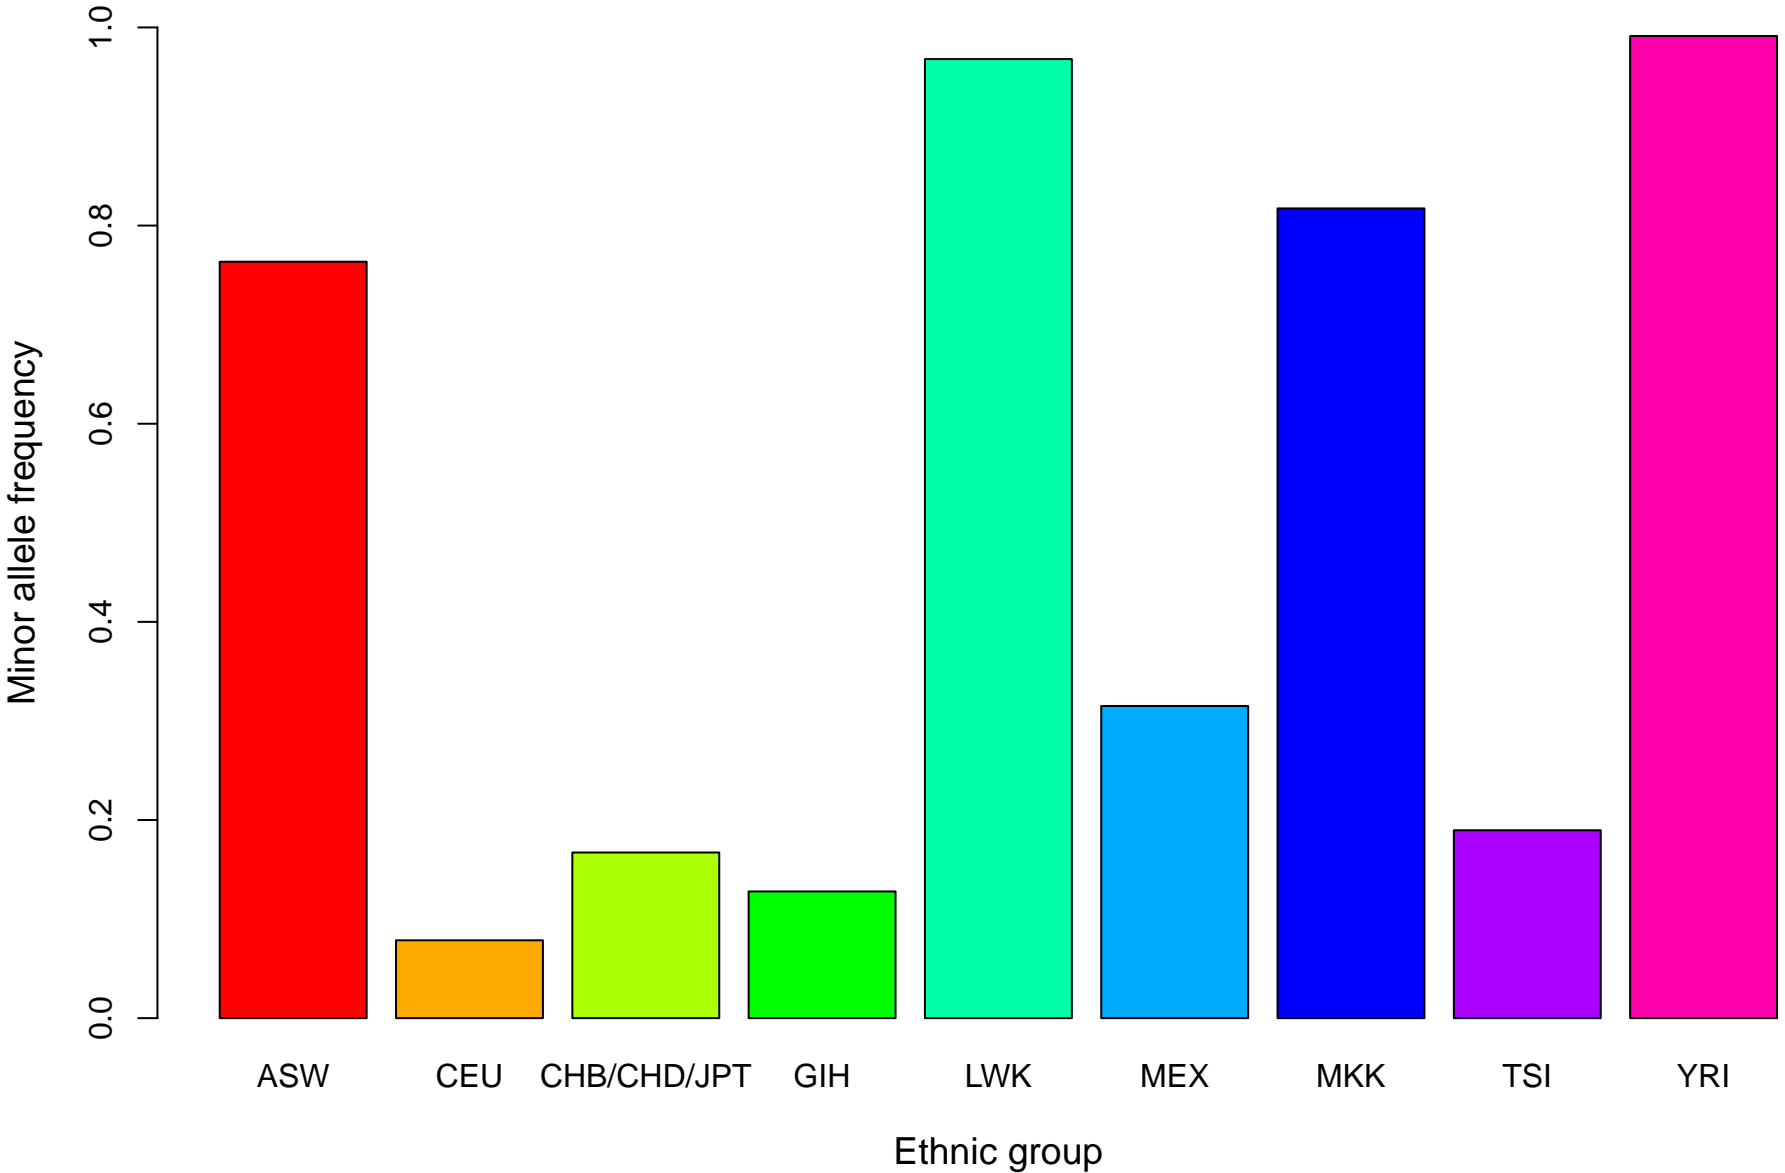

# rs1355845\_G

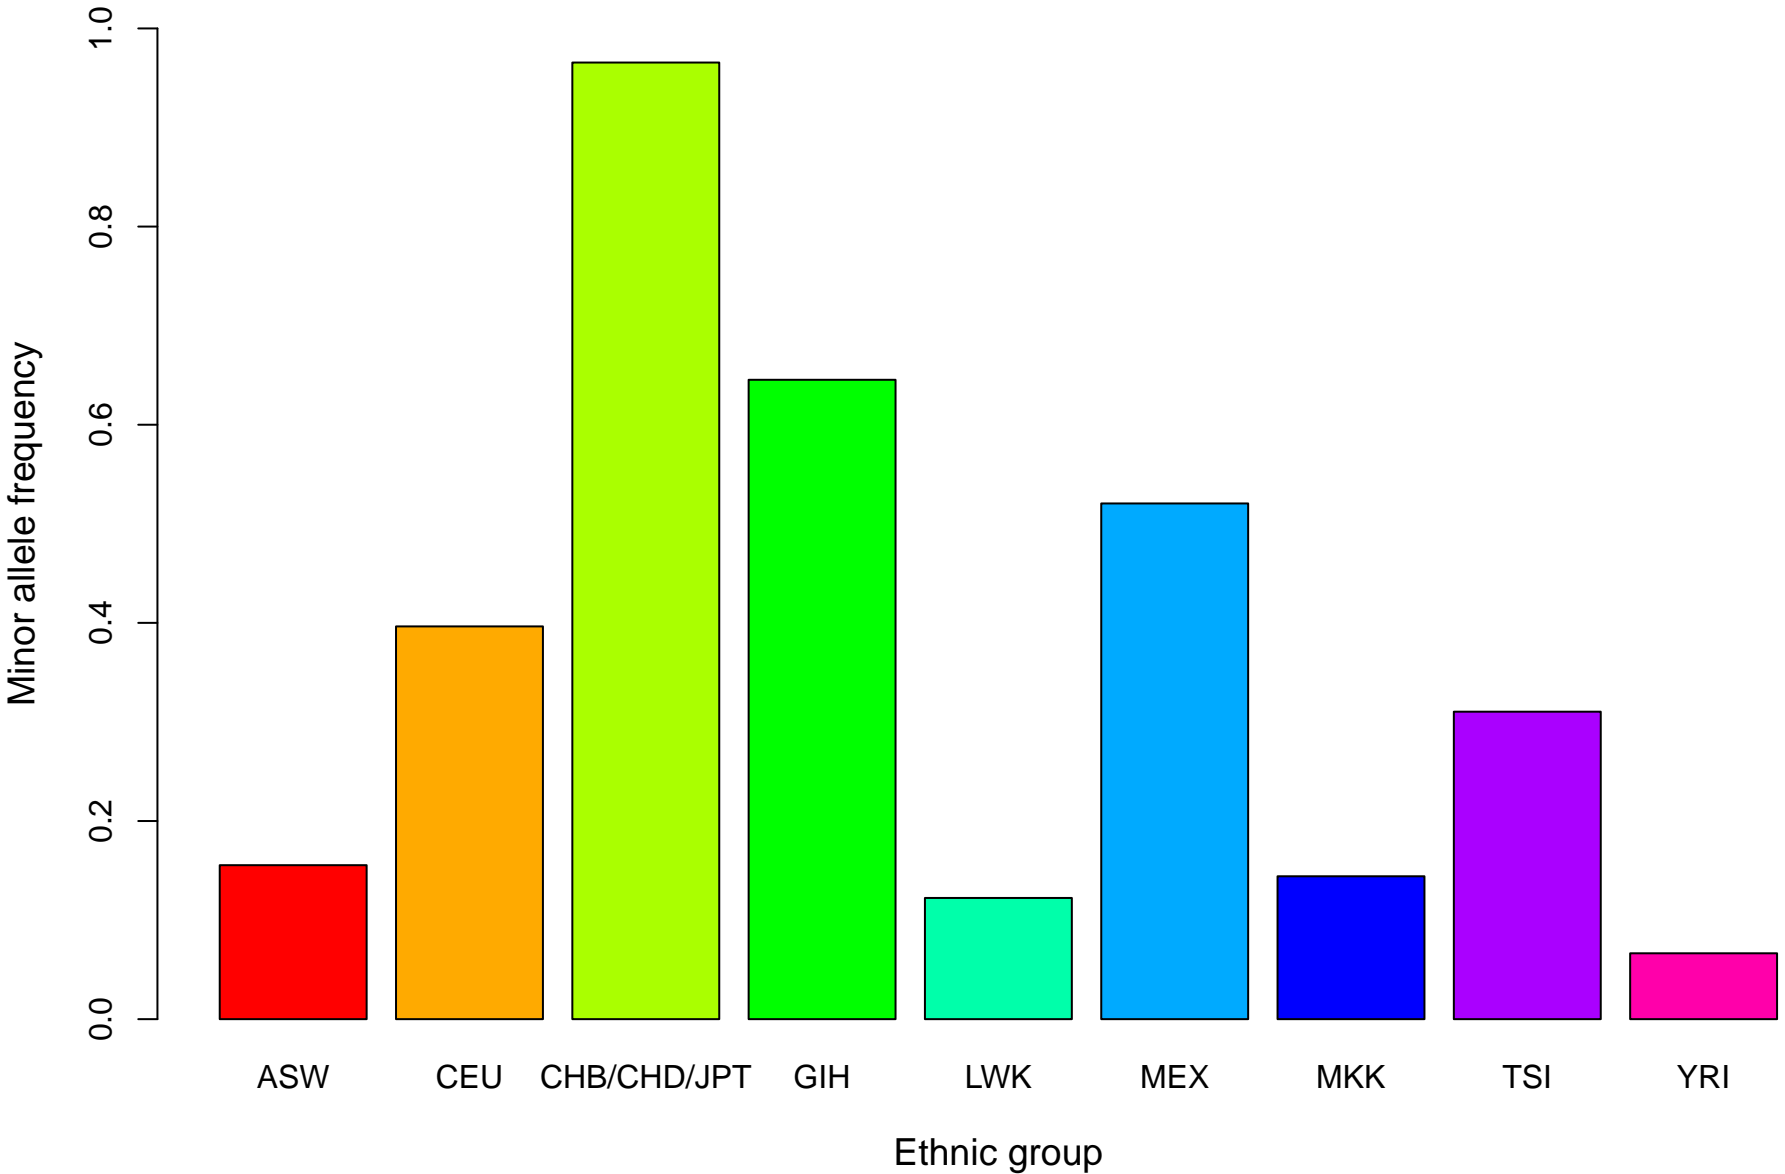

# rs4897728\_T

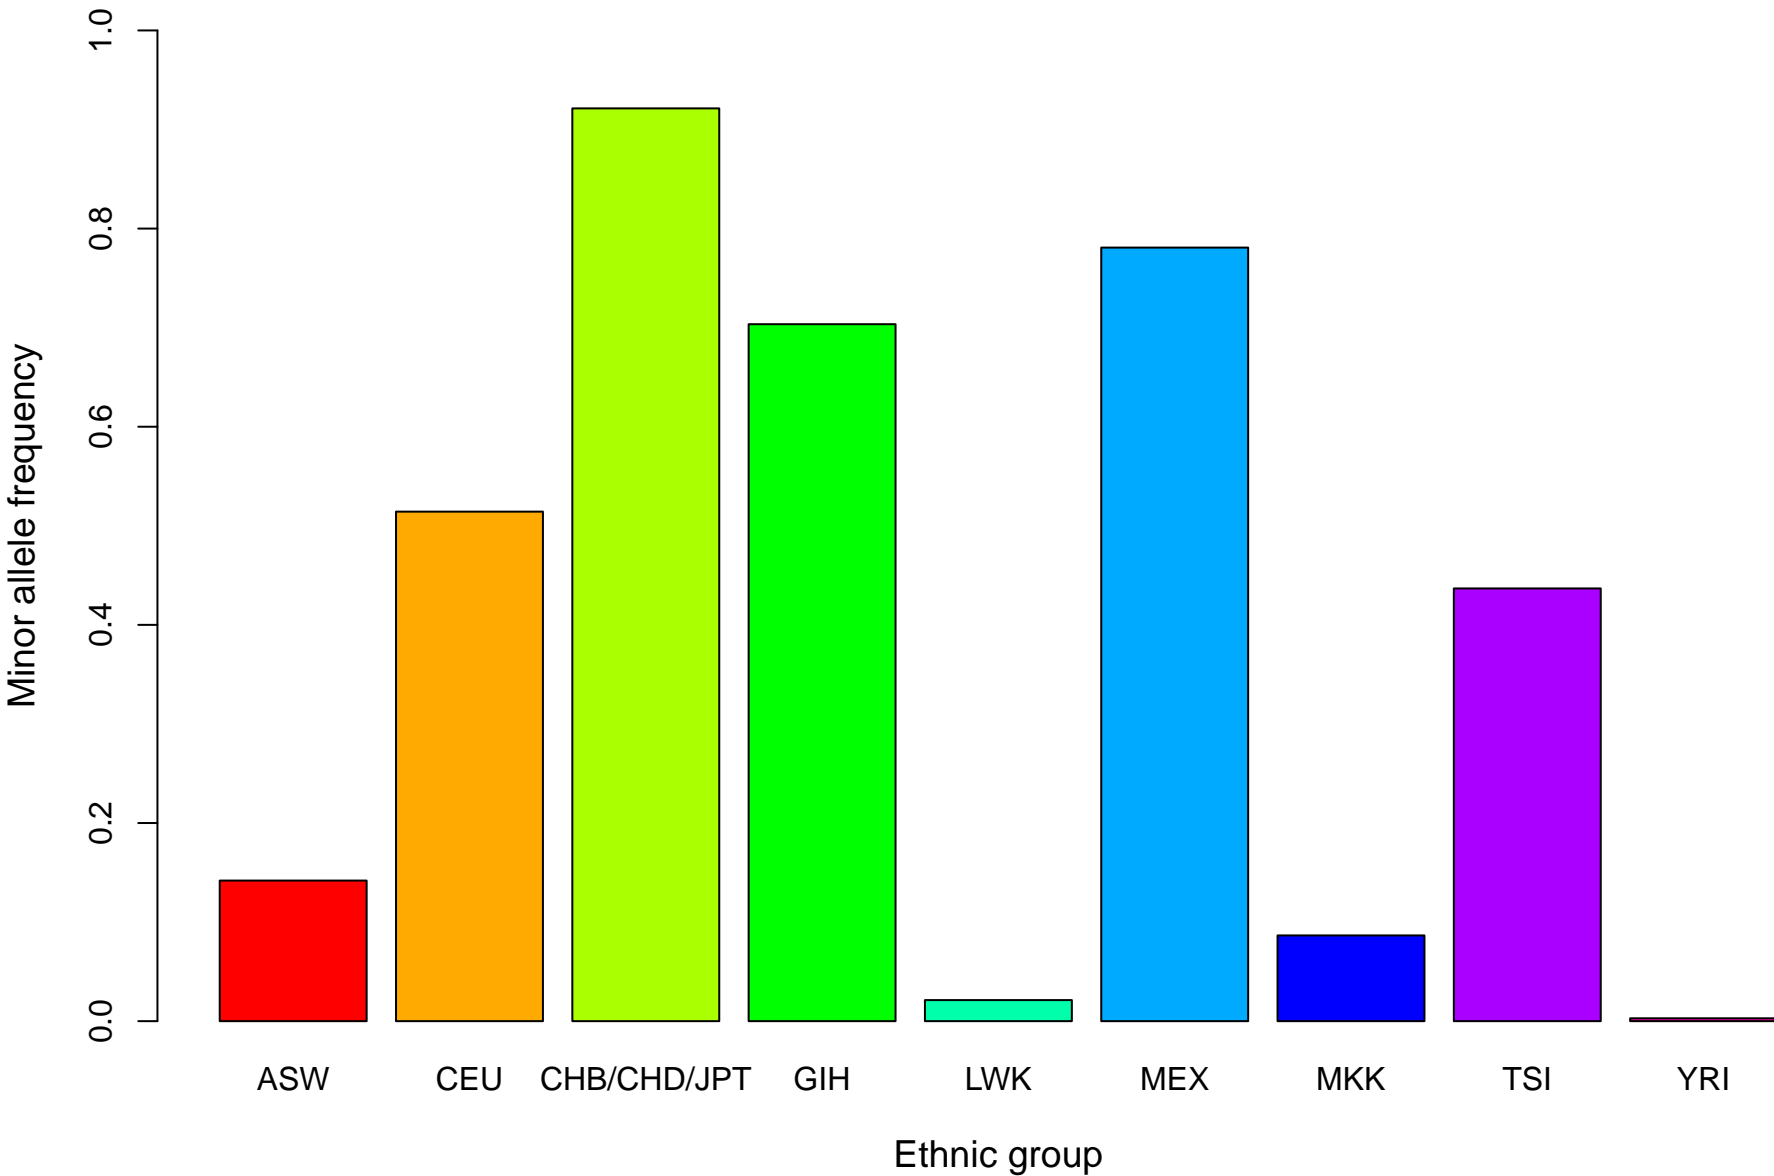

# rs11693376\_G

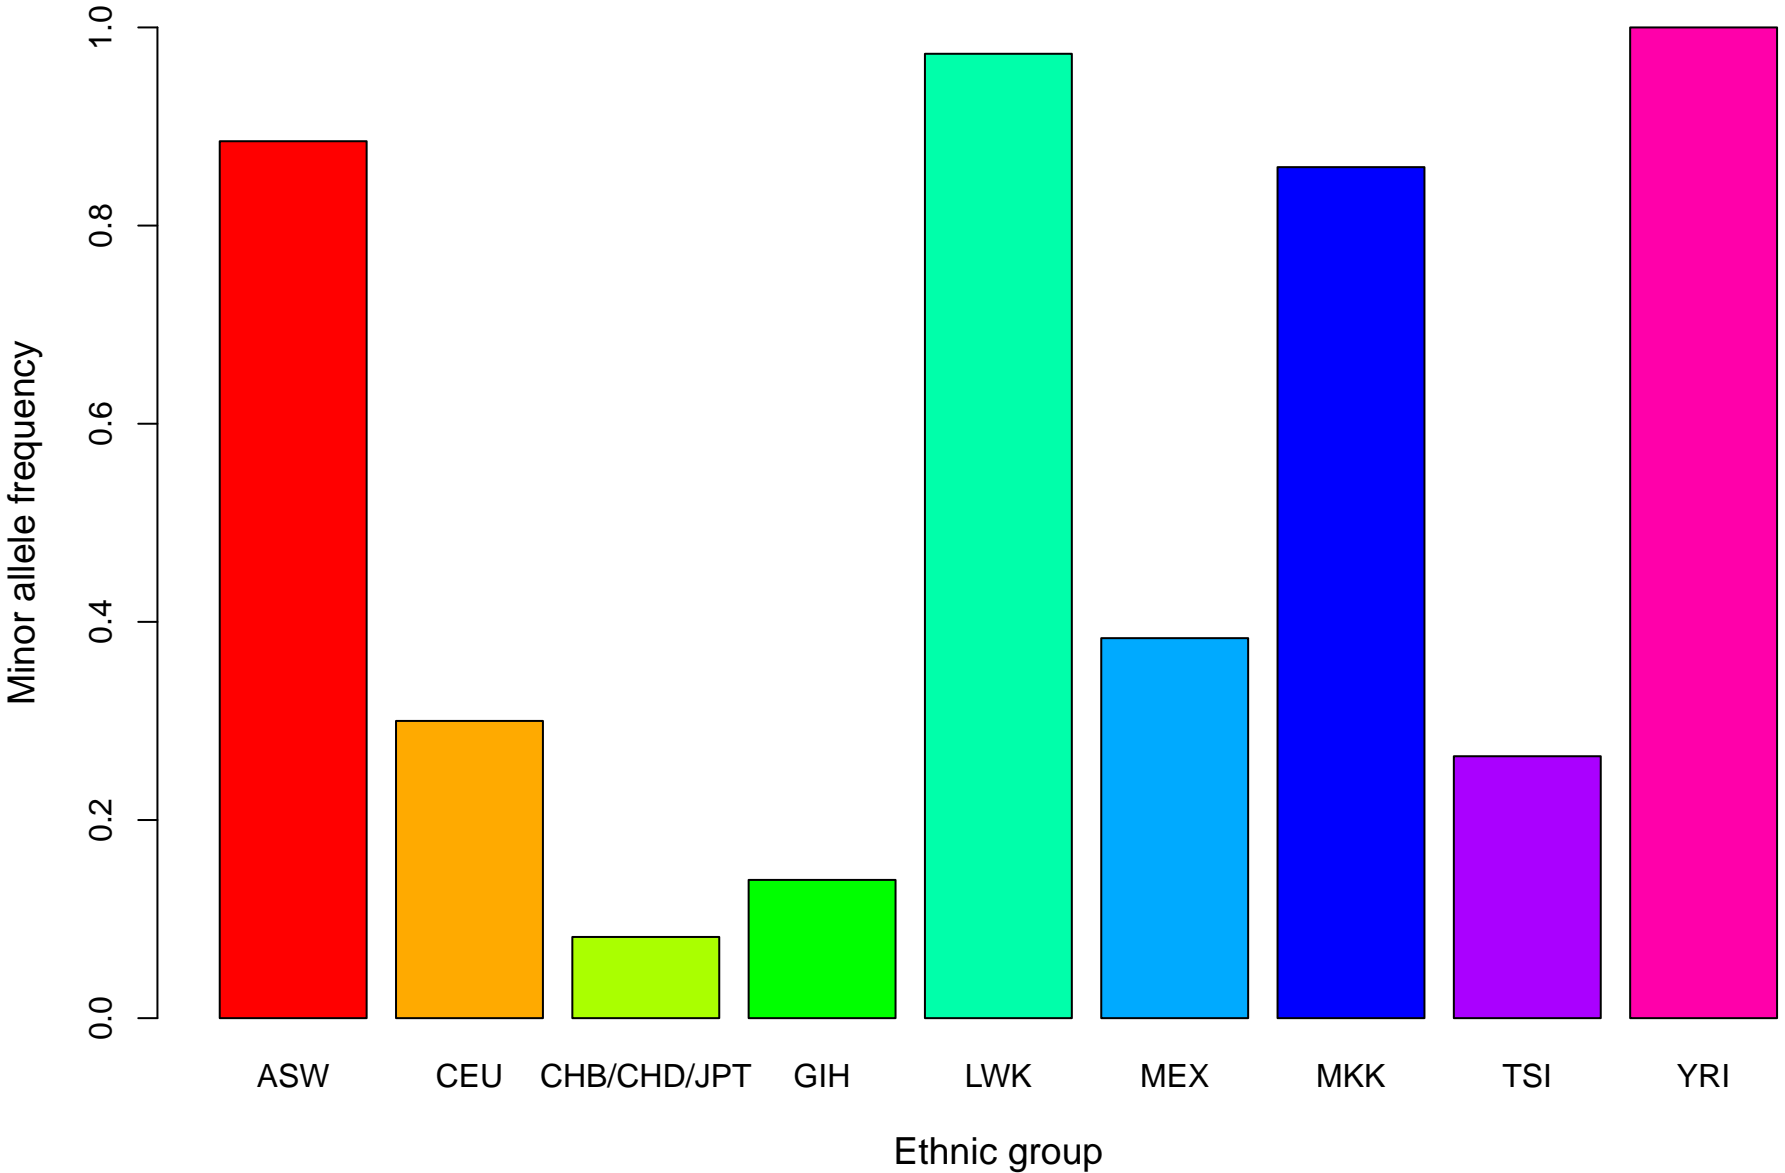



# rs2129801\_C

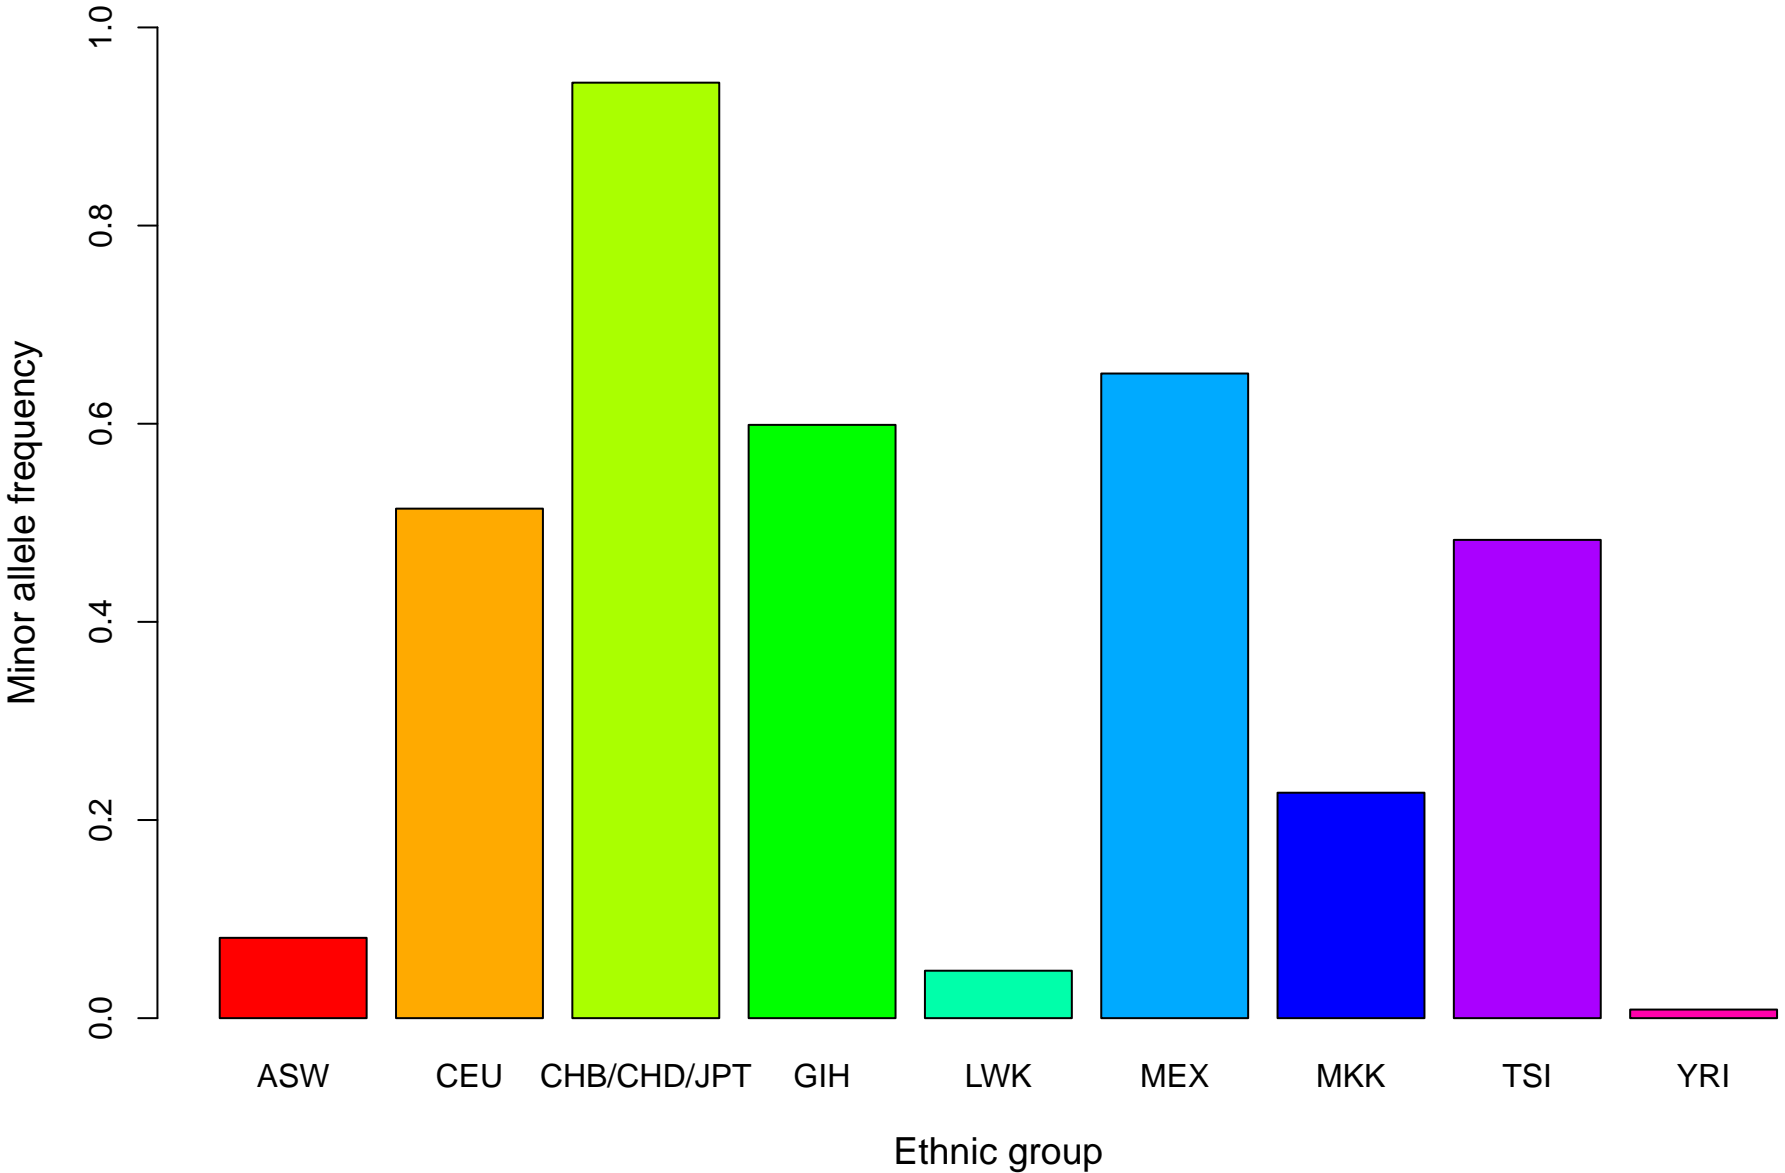

# rs10939499\_G

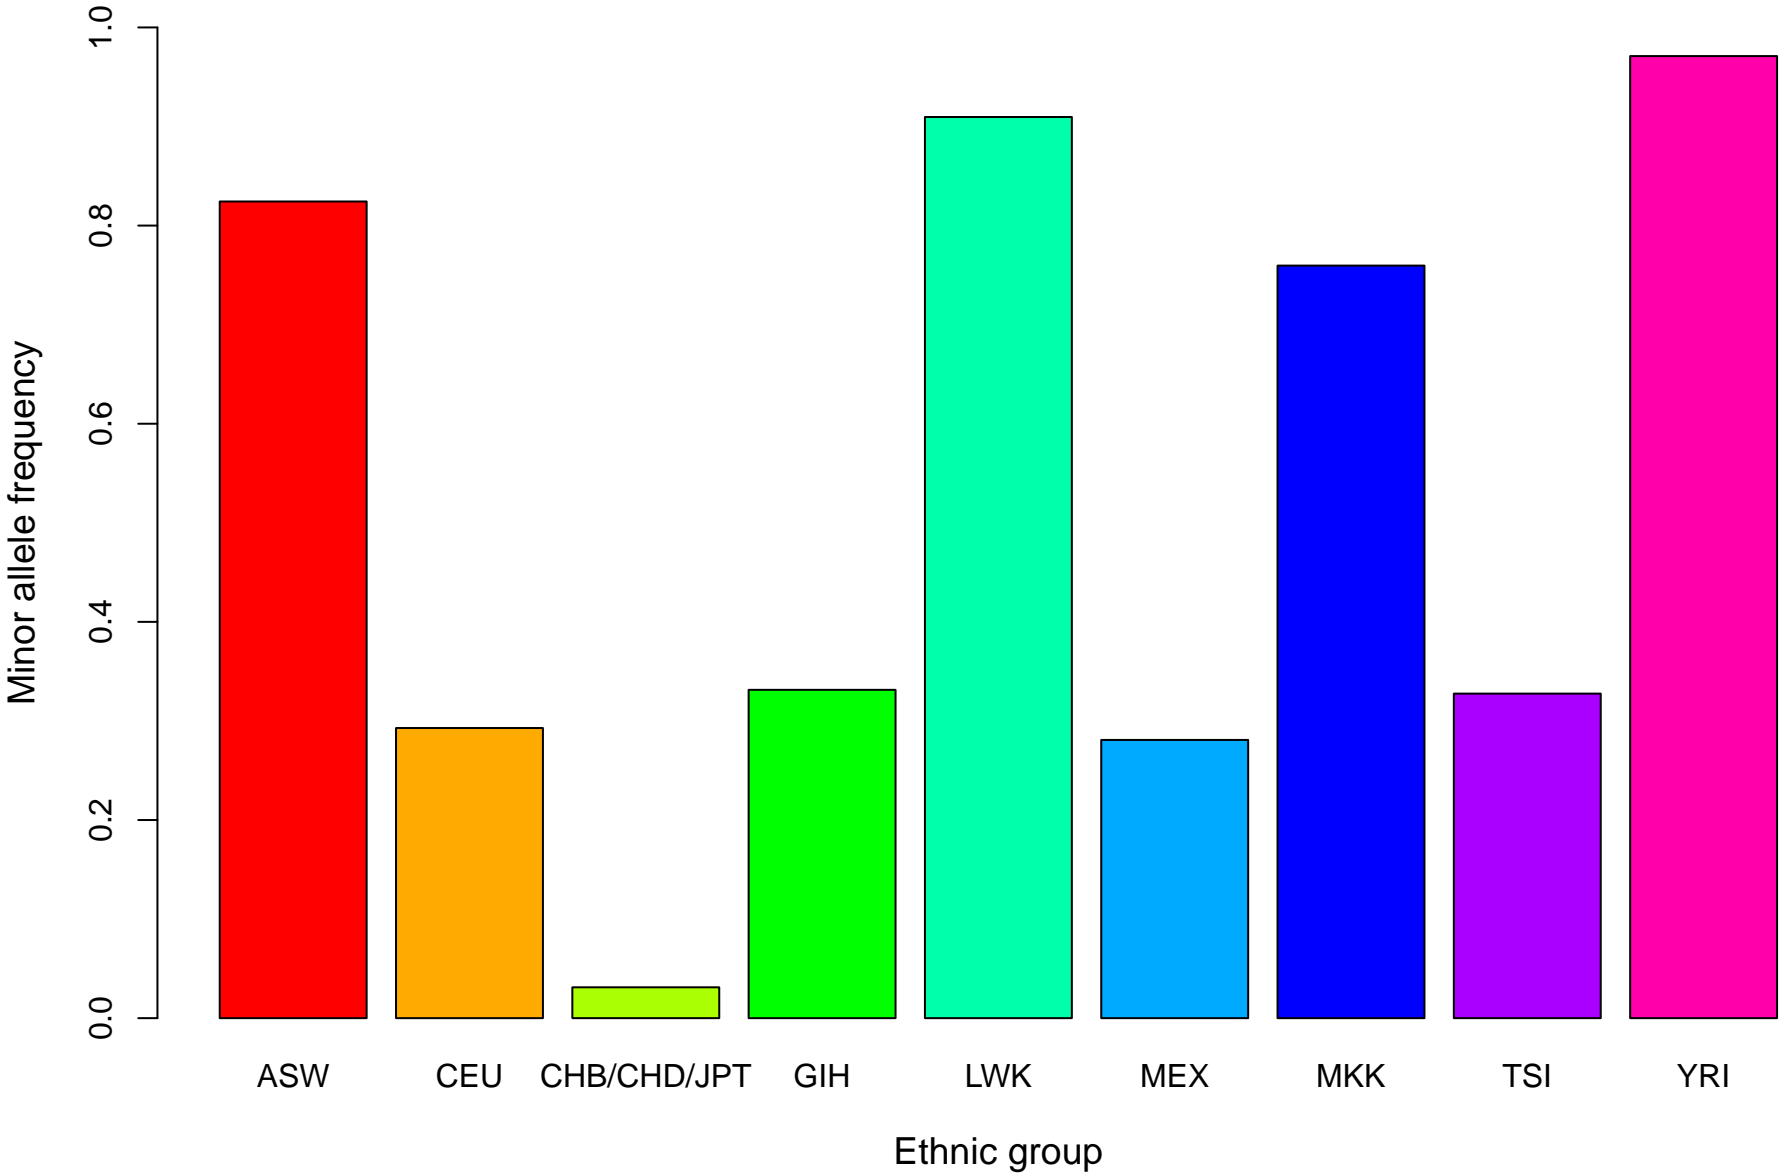

# rs7541084\_G

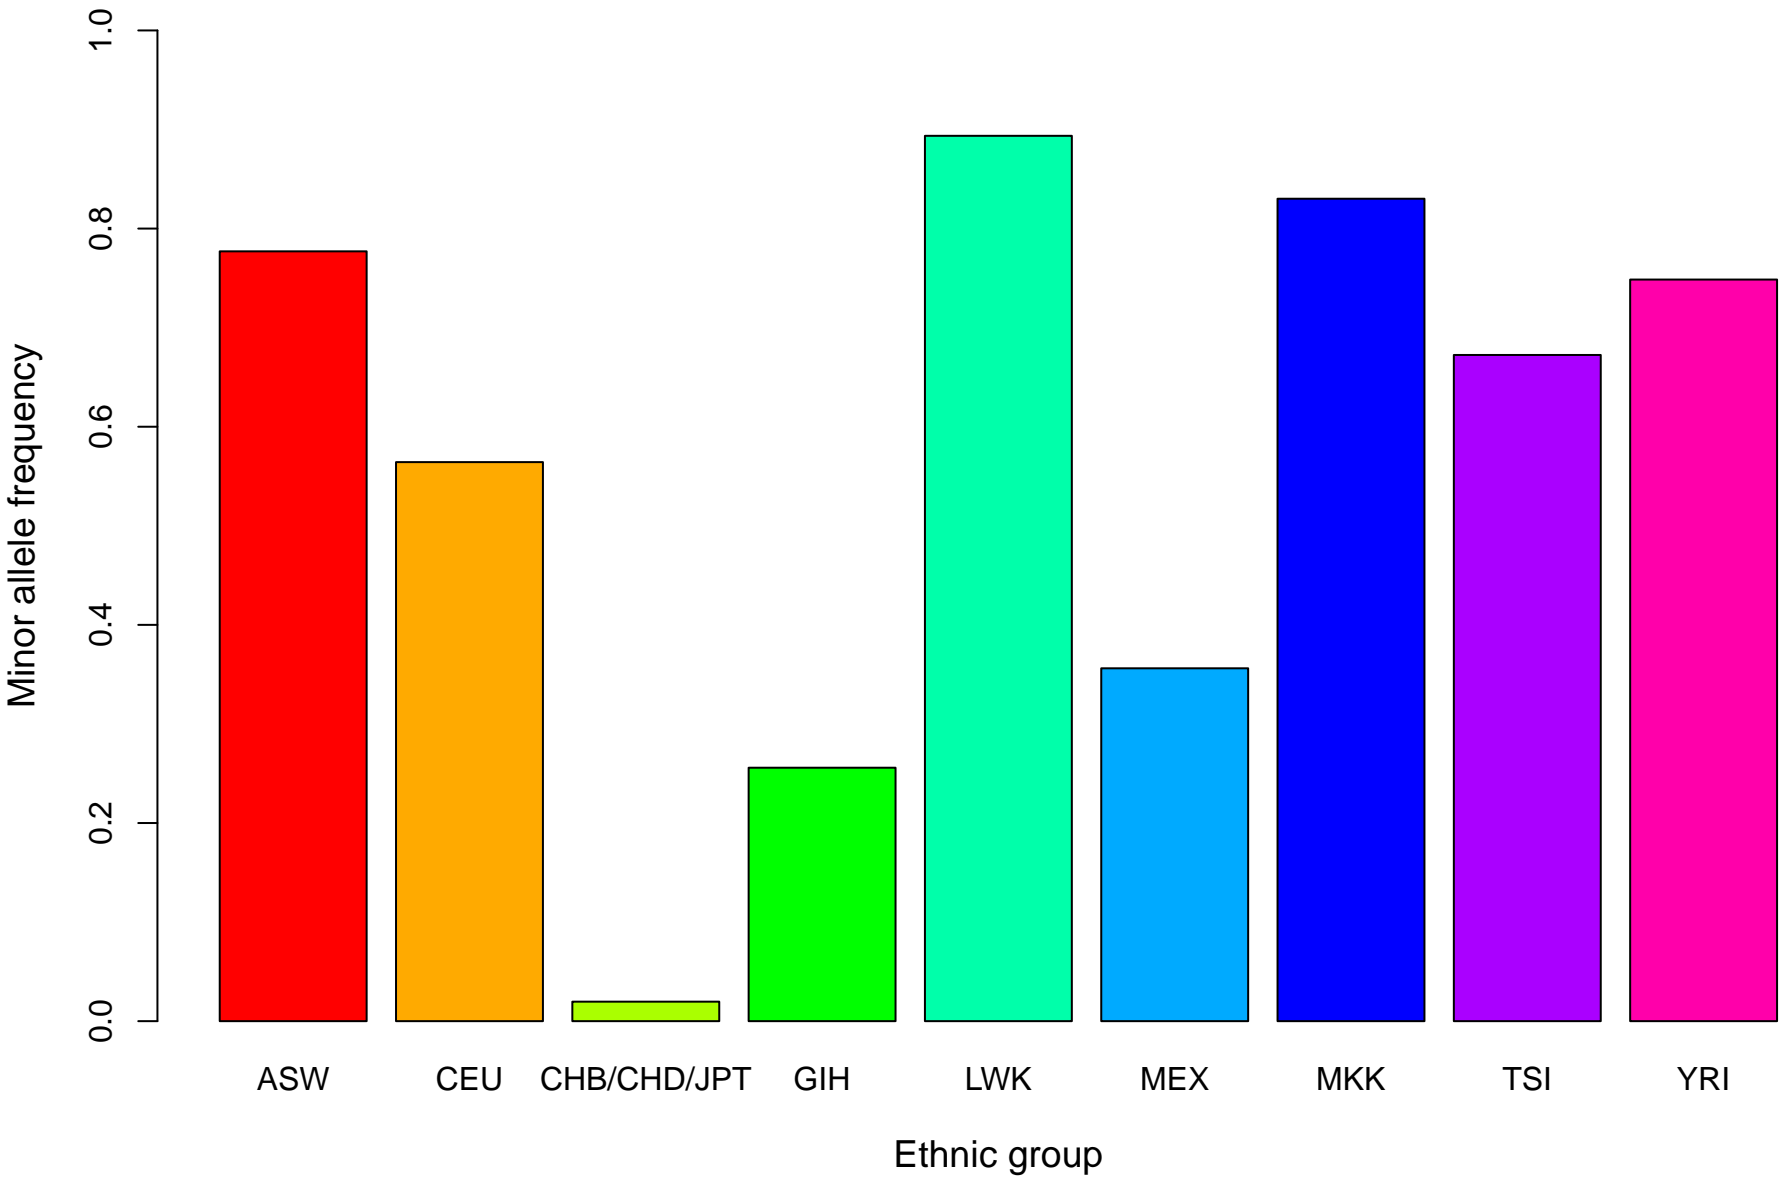

# rs5025718\_T

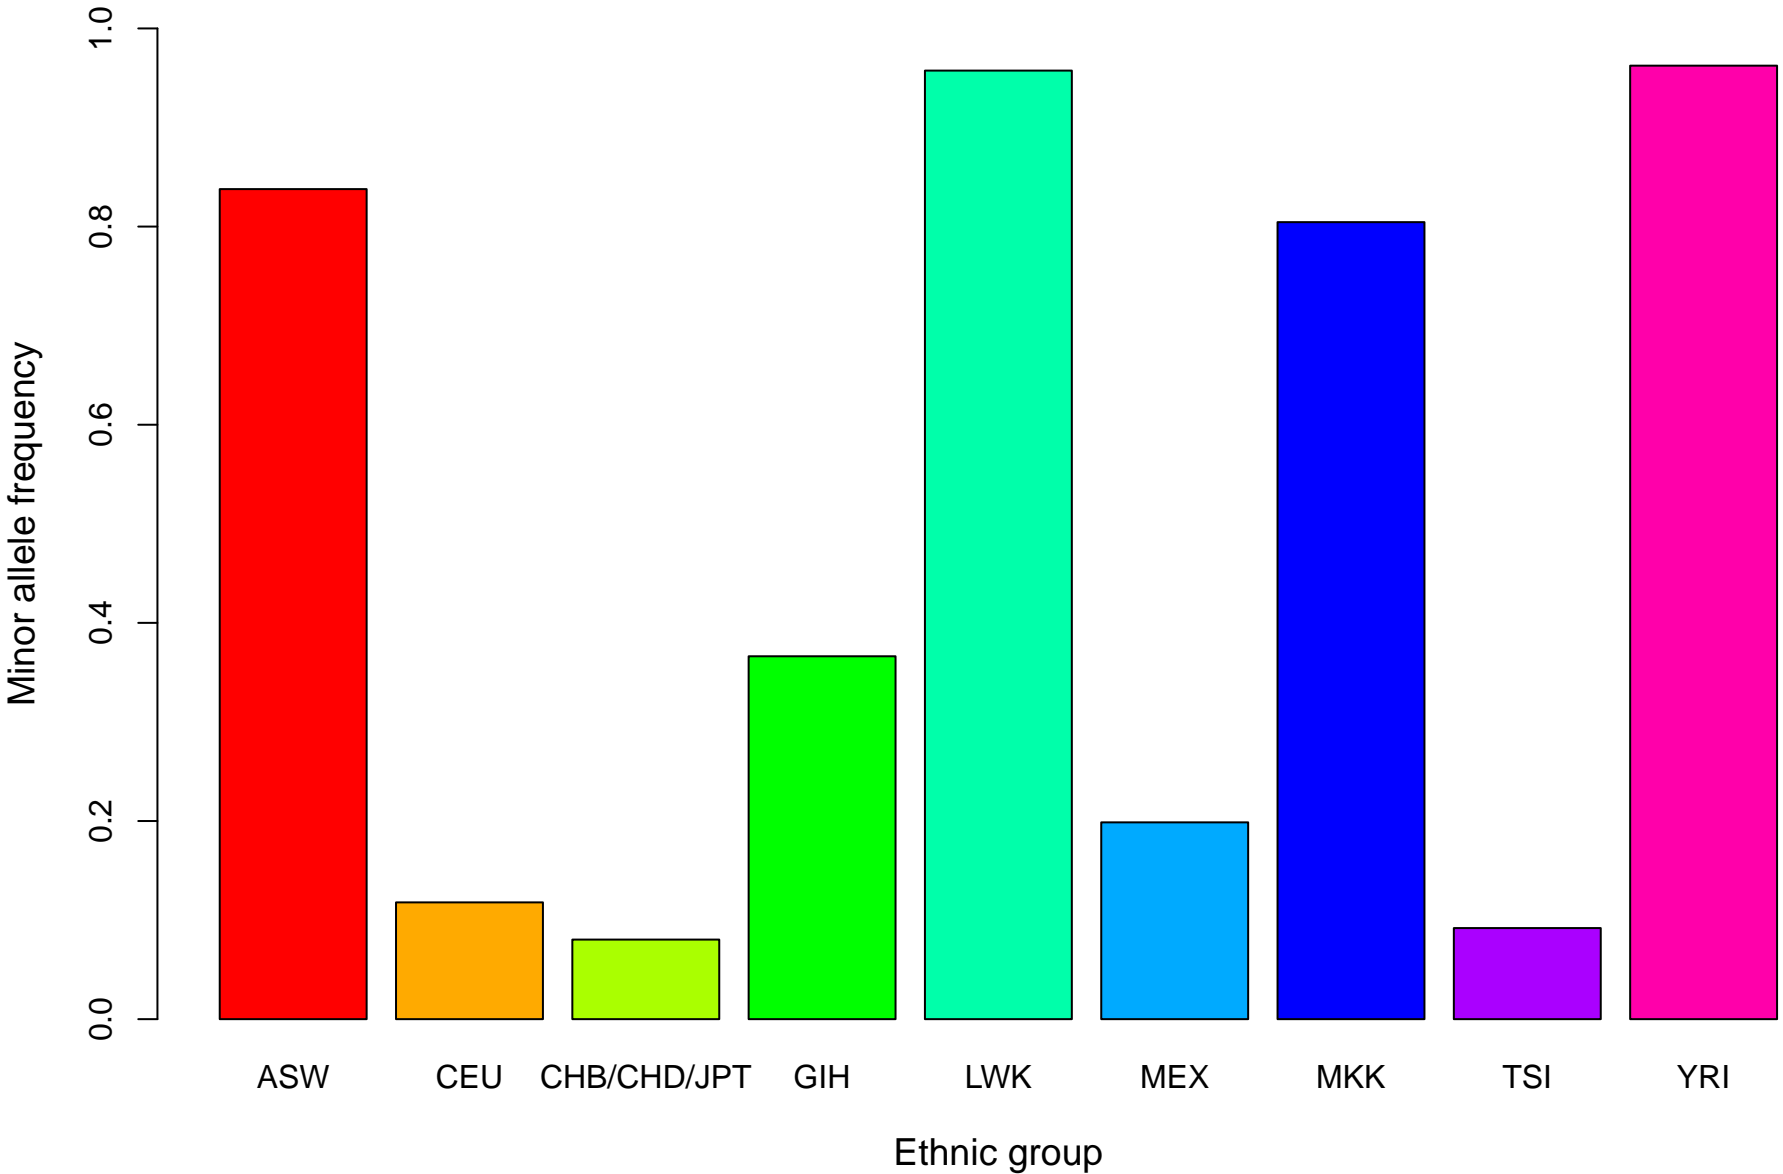

# rs12541800\_A

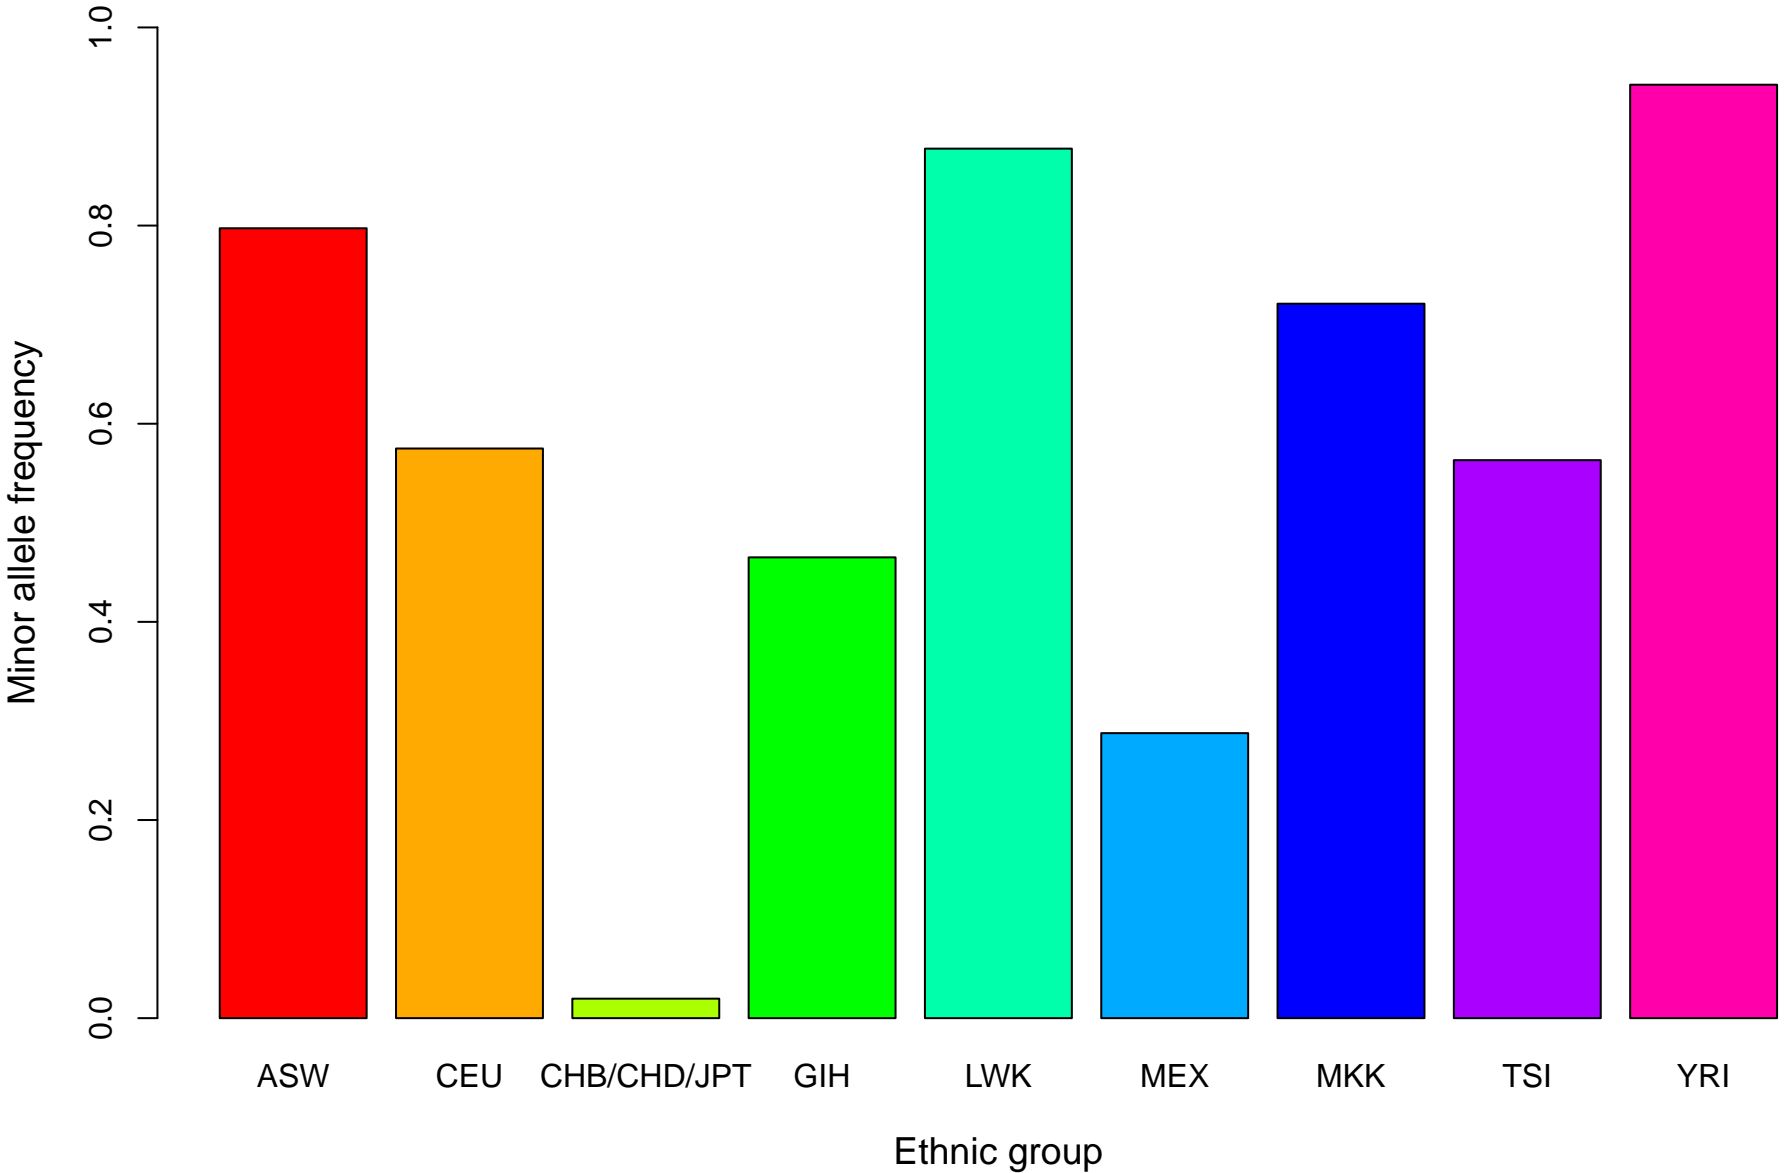

# rs7736417\_T

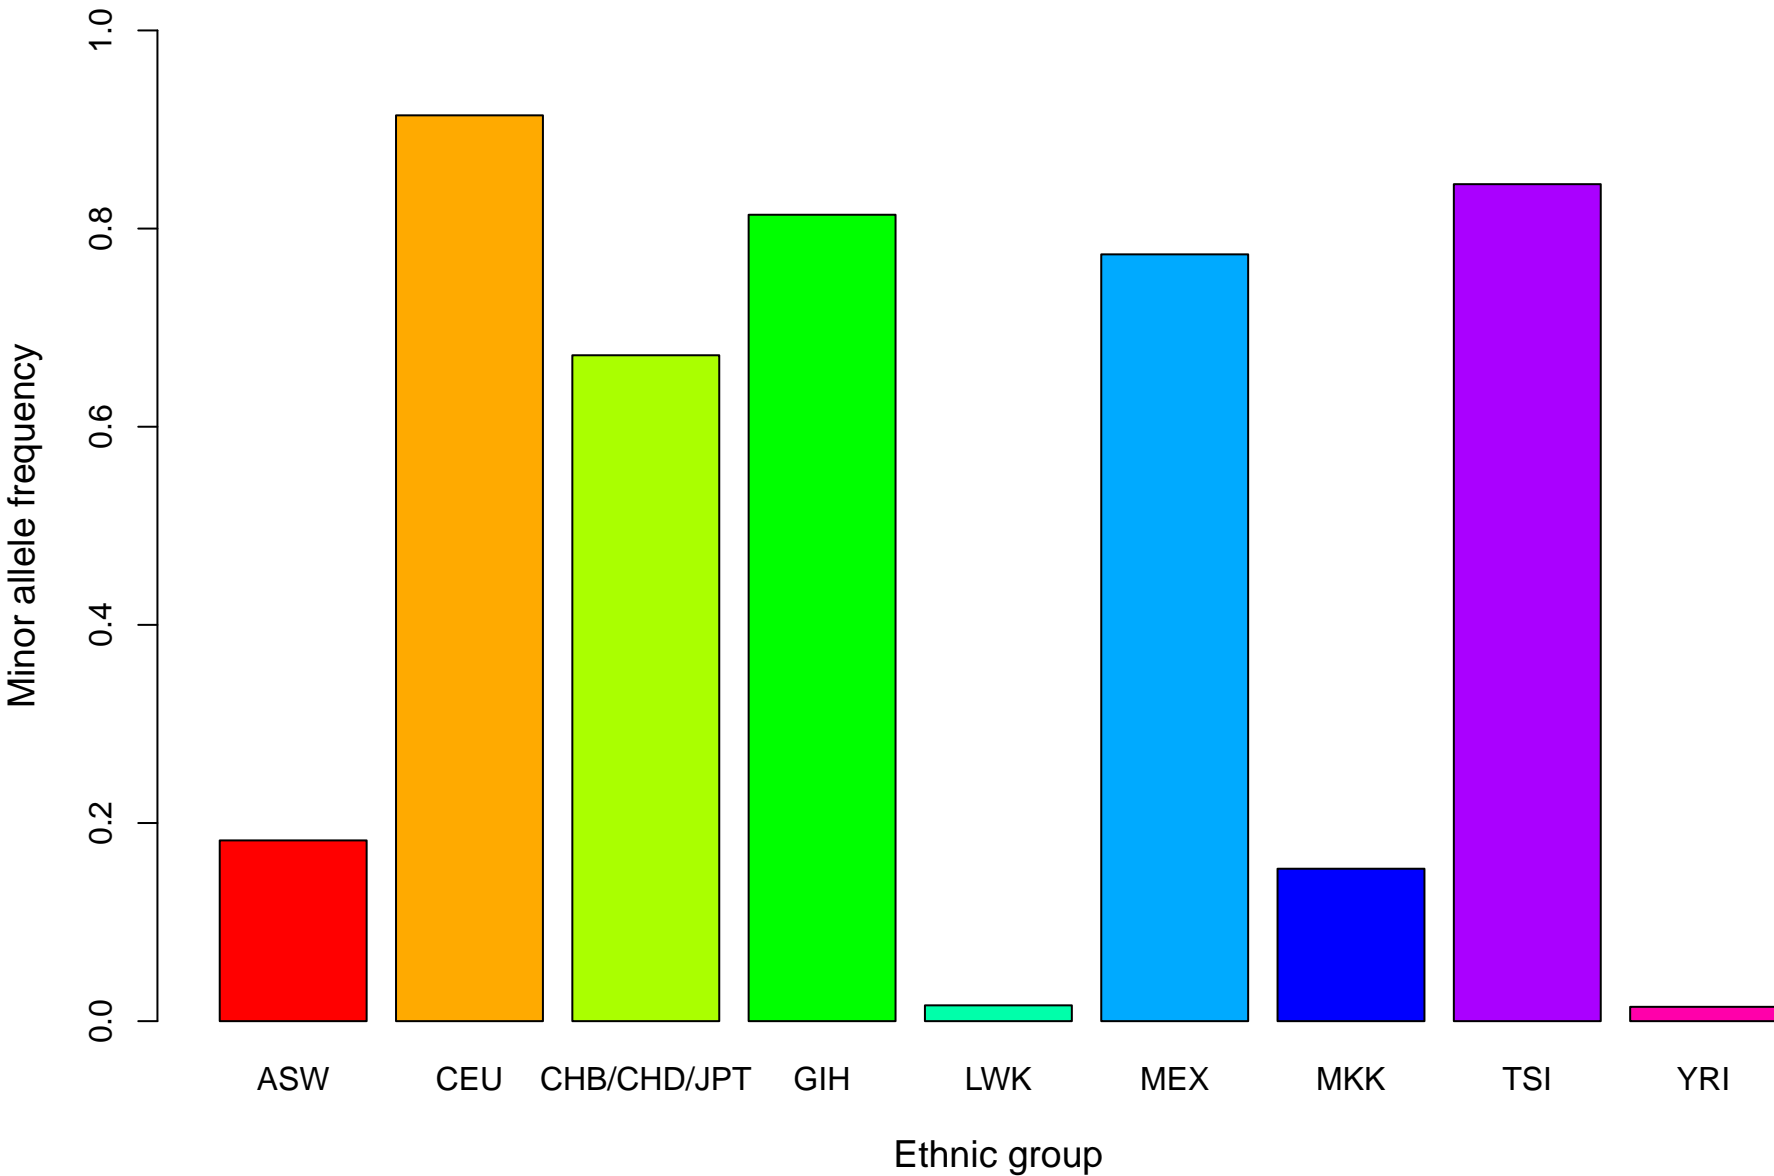

# rs528402\_T

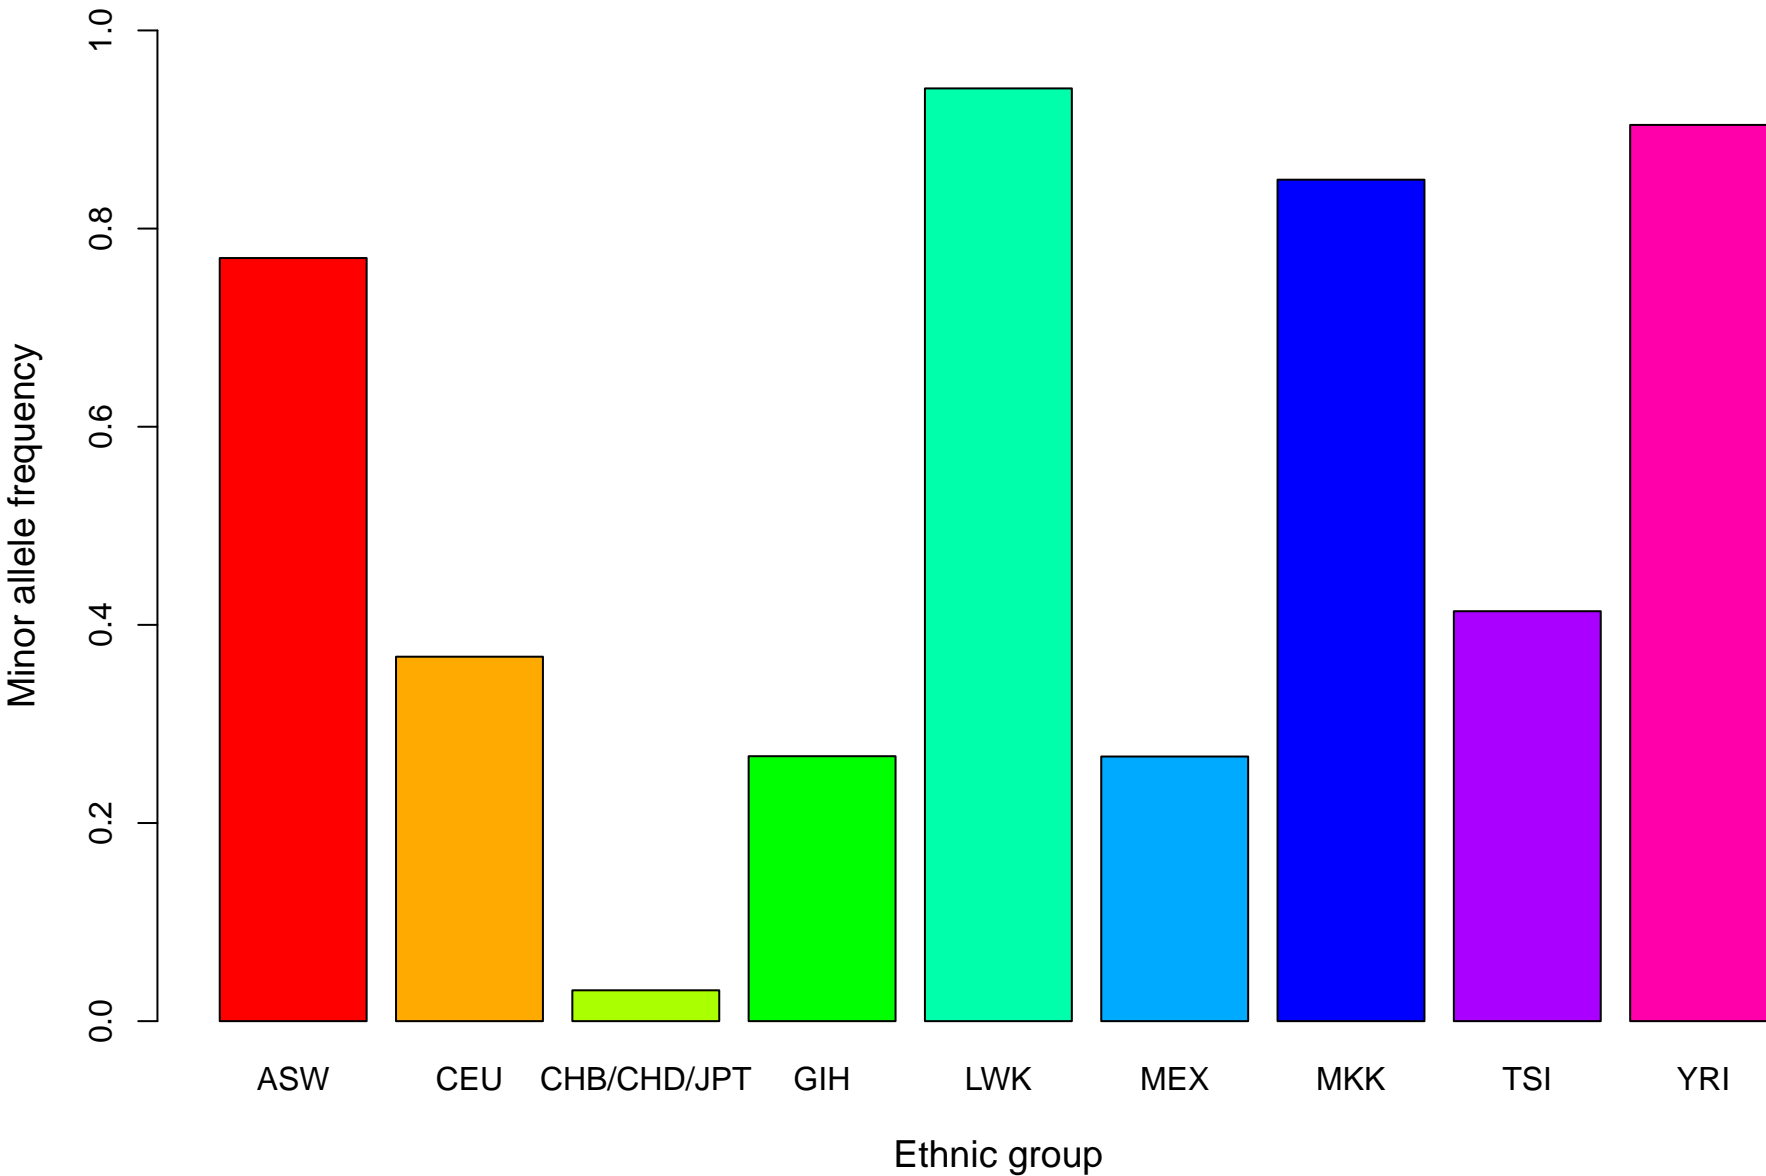

# rs12926295\_T

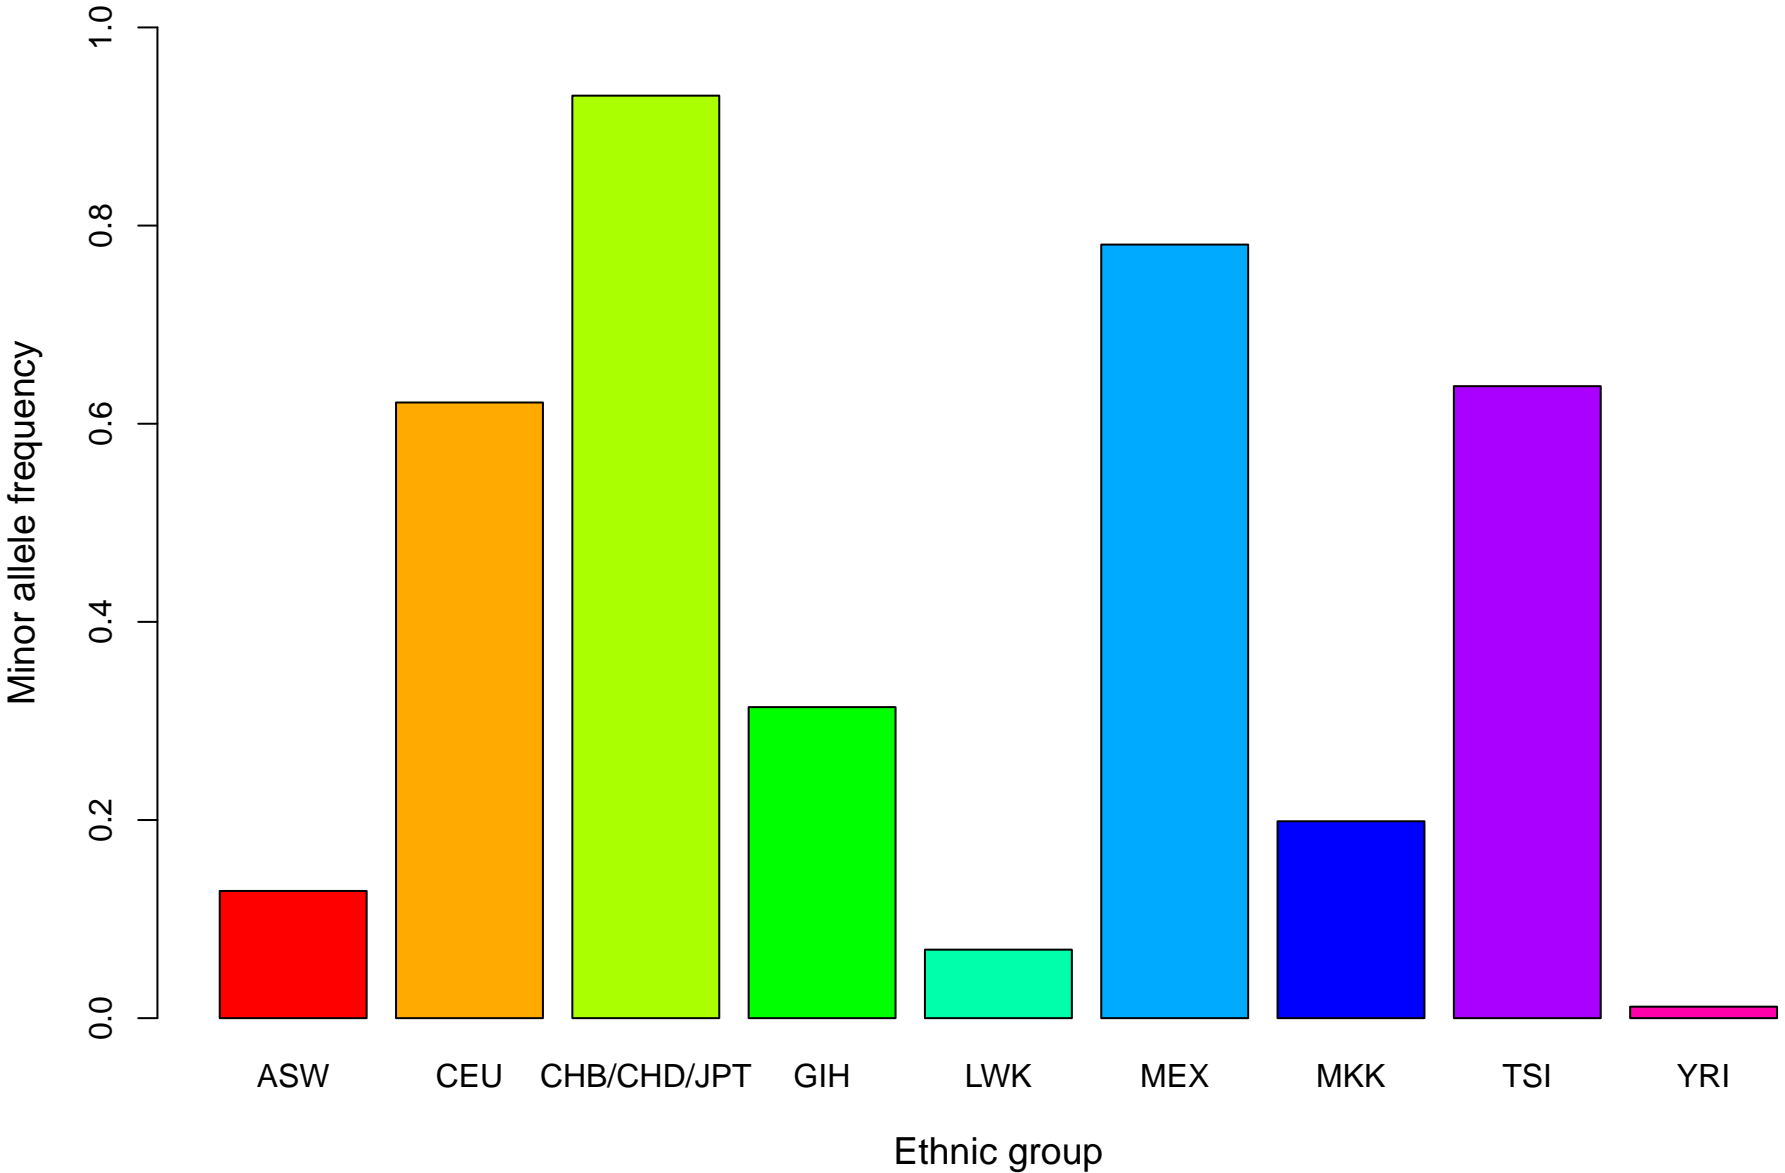



# rs7873826\_G

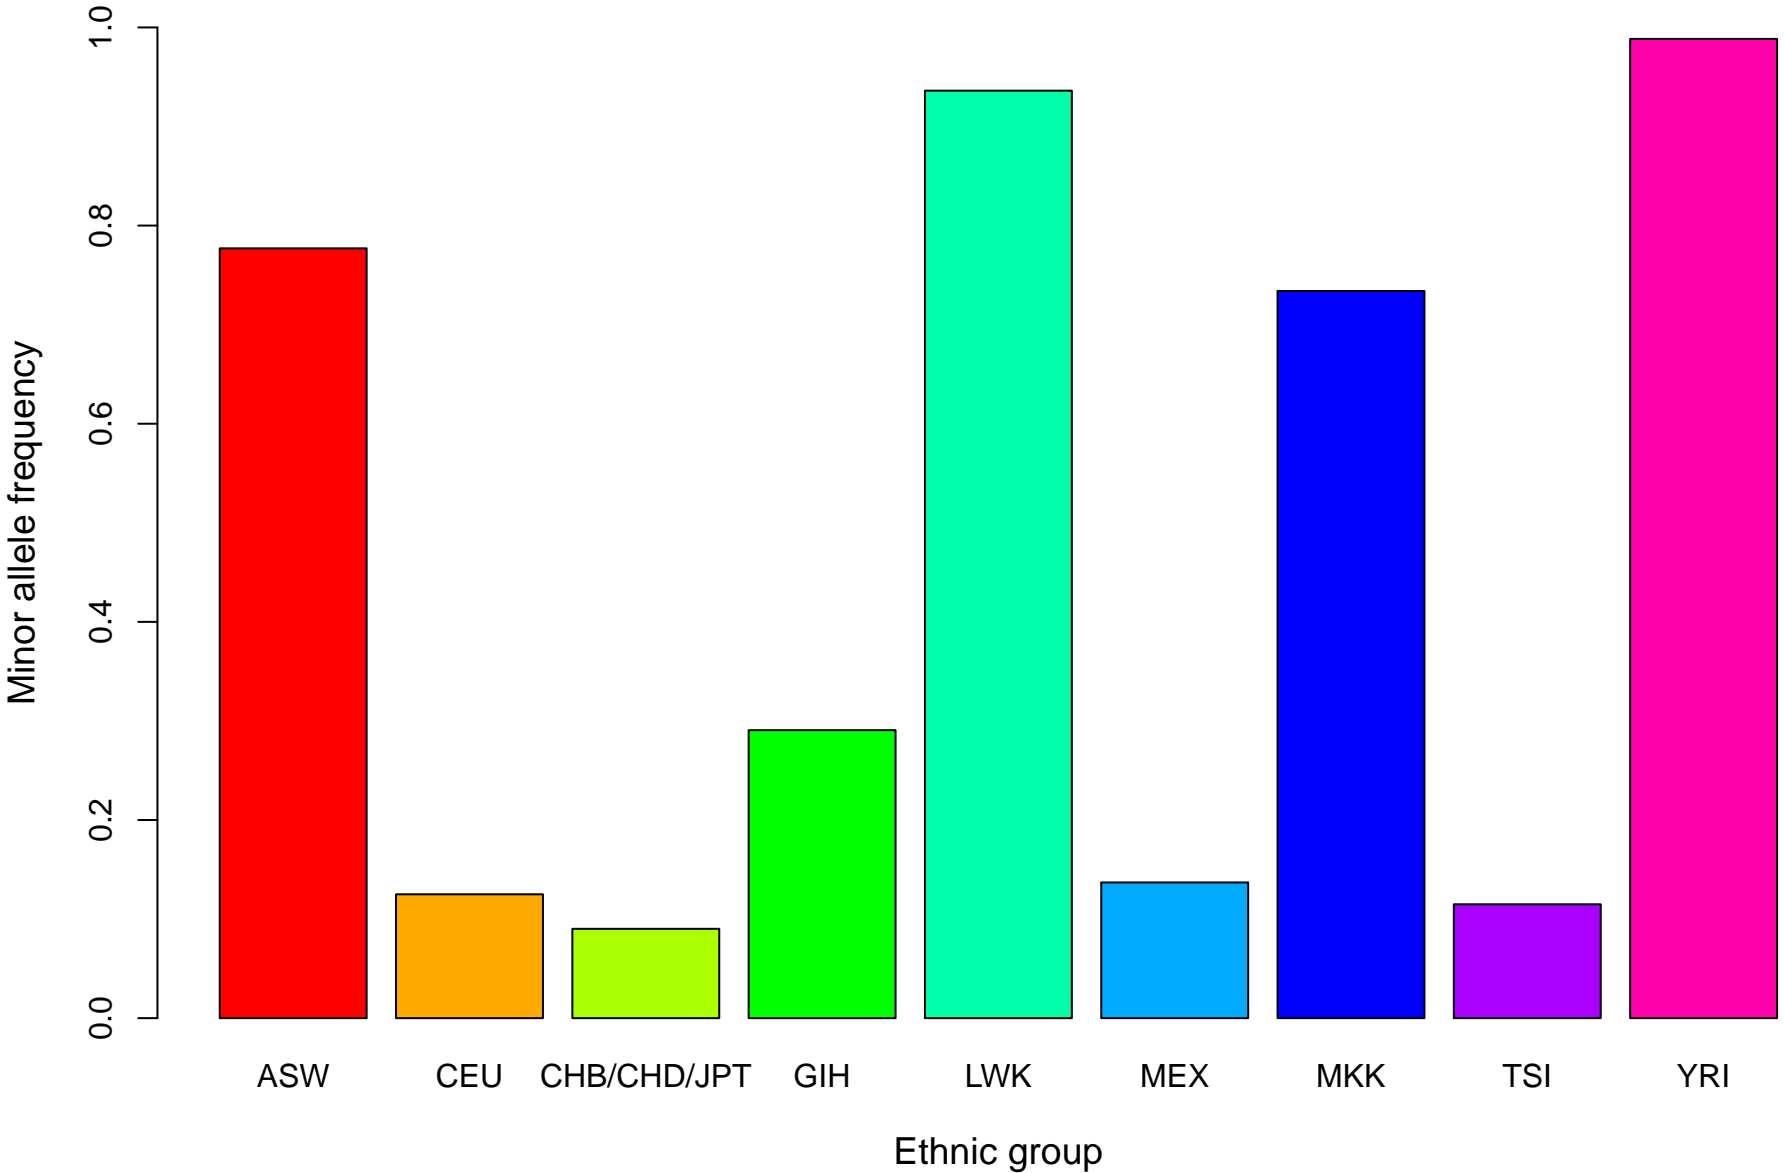

# rs10188217\_T

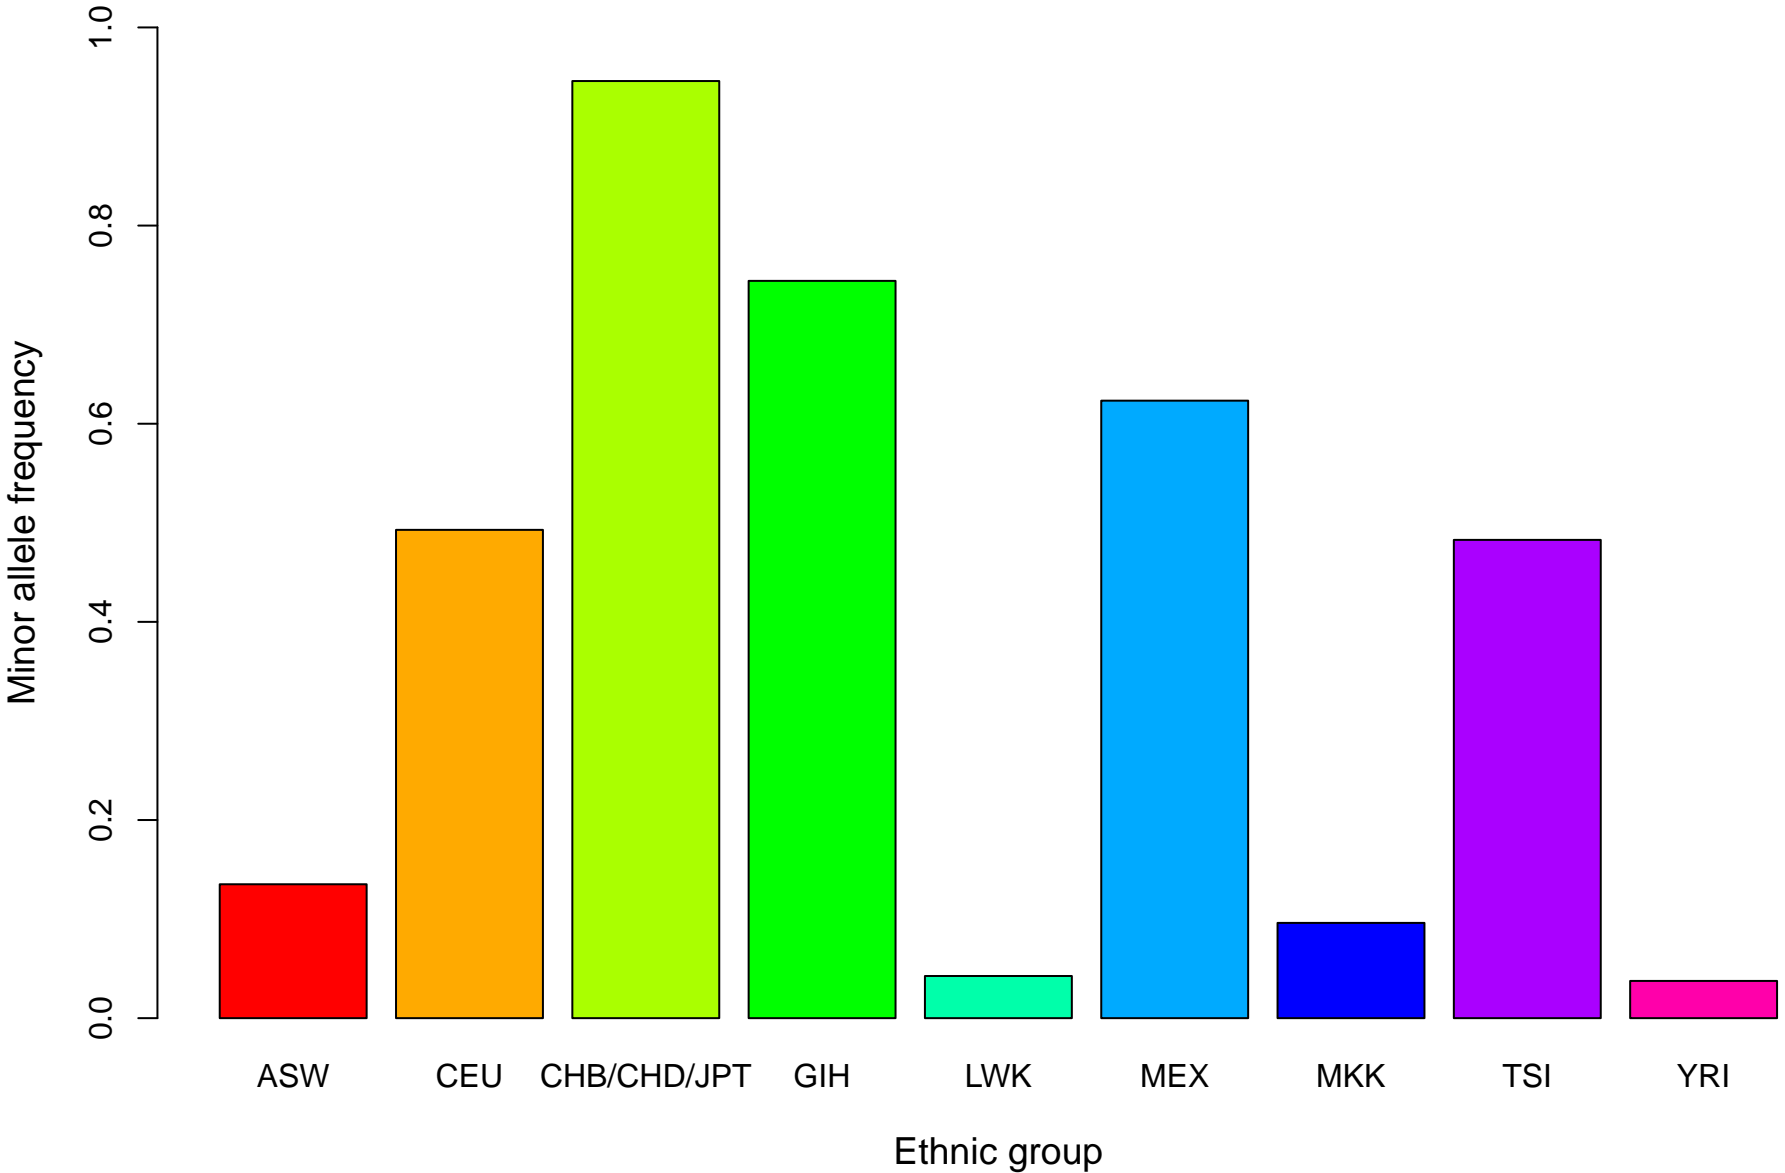

# rs853971\_C

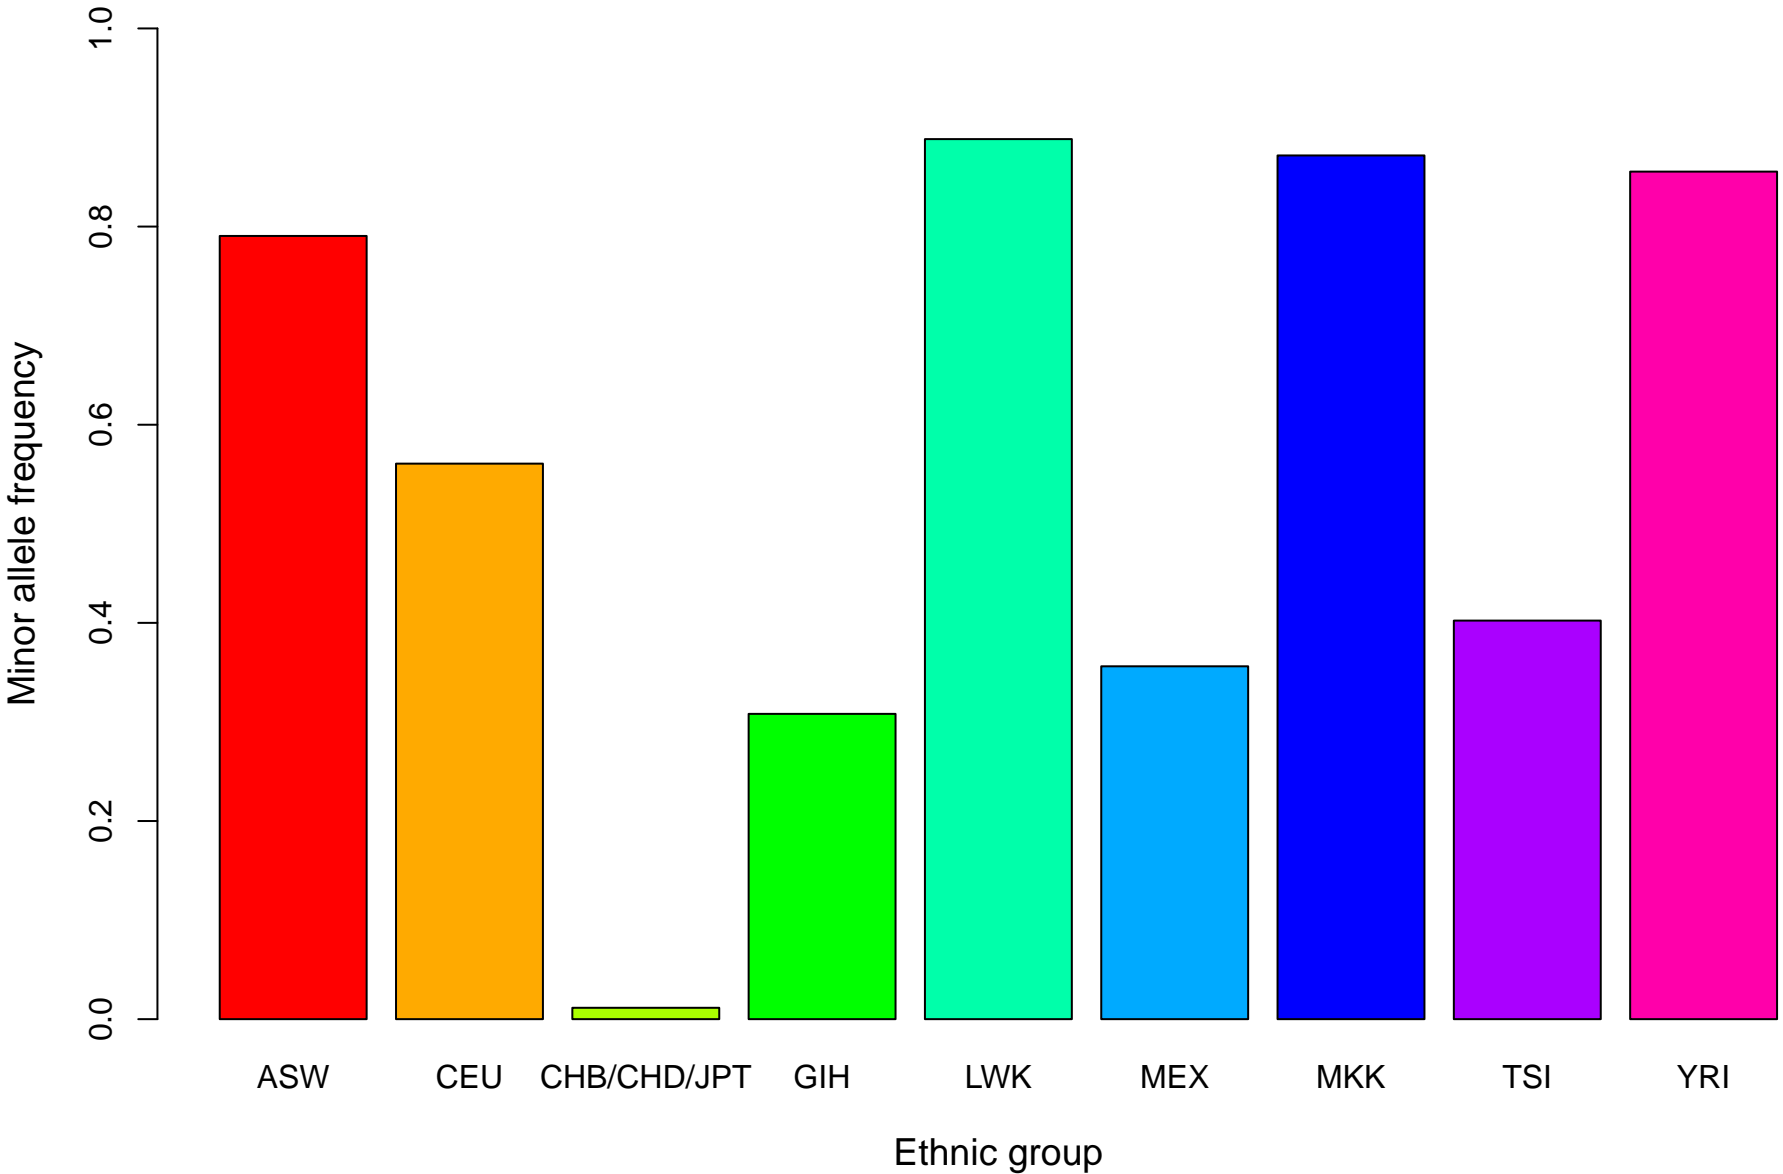

# rs9899687\_C

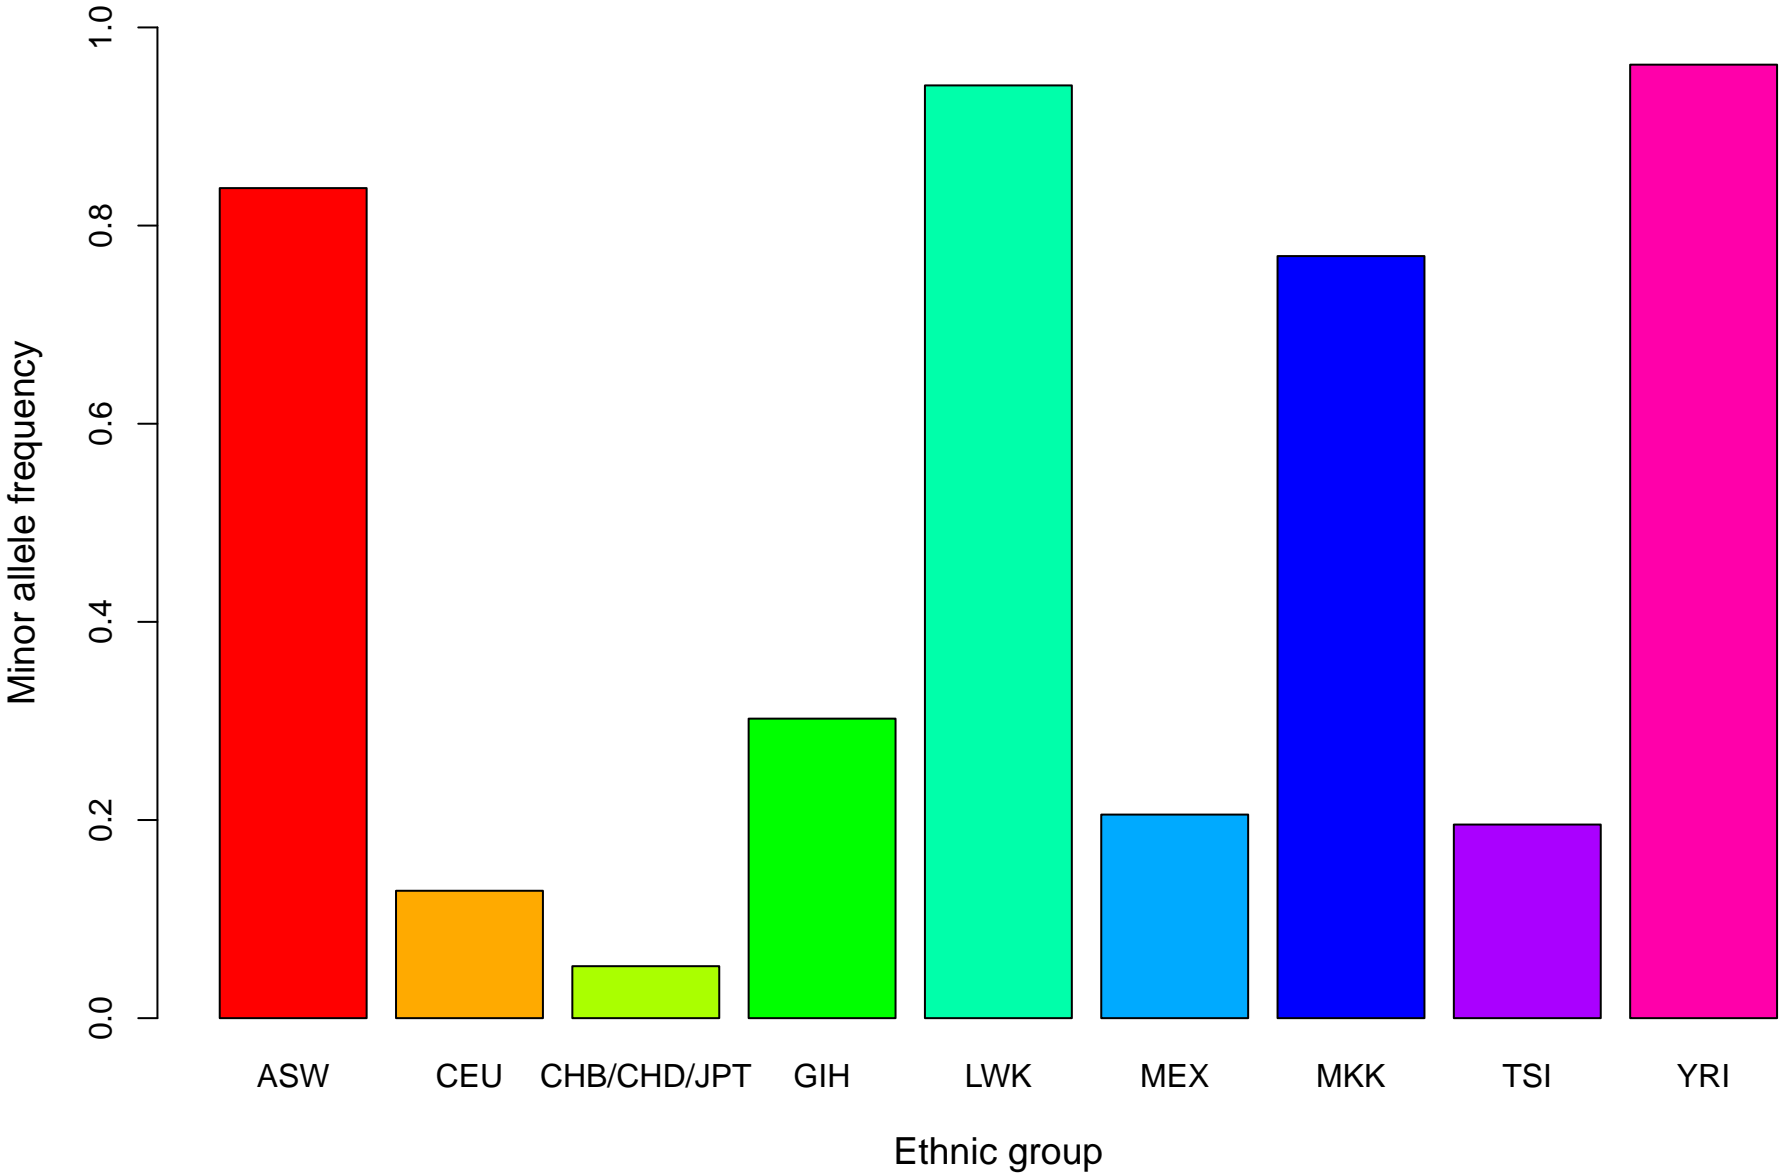

# rs4132888\_G

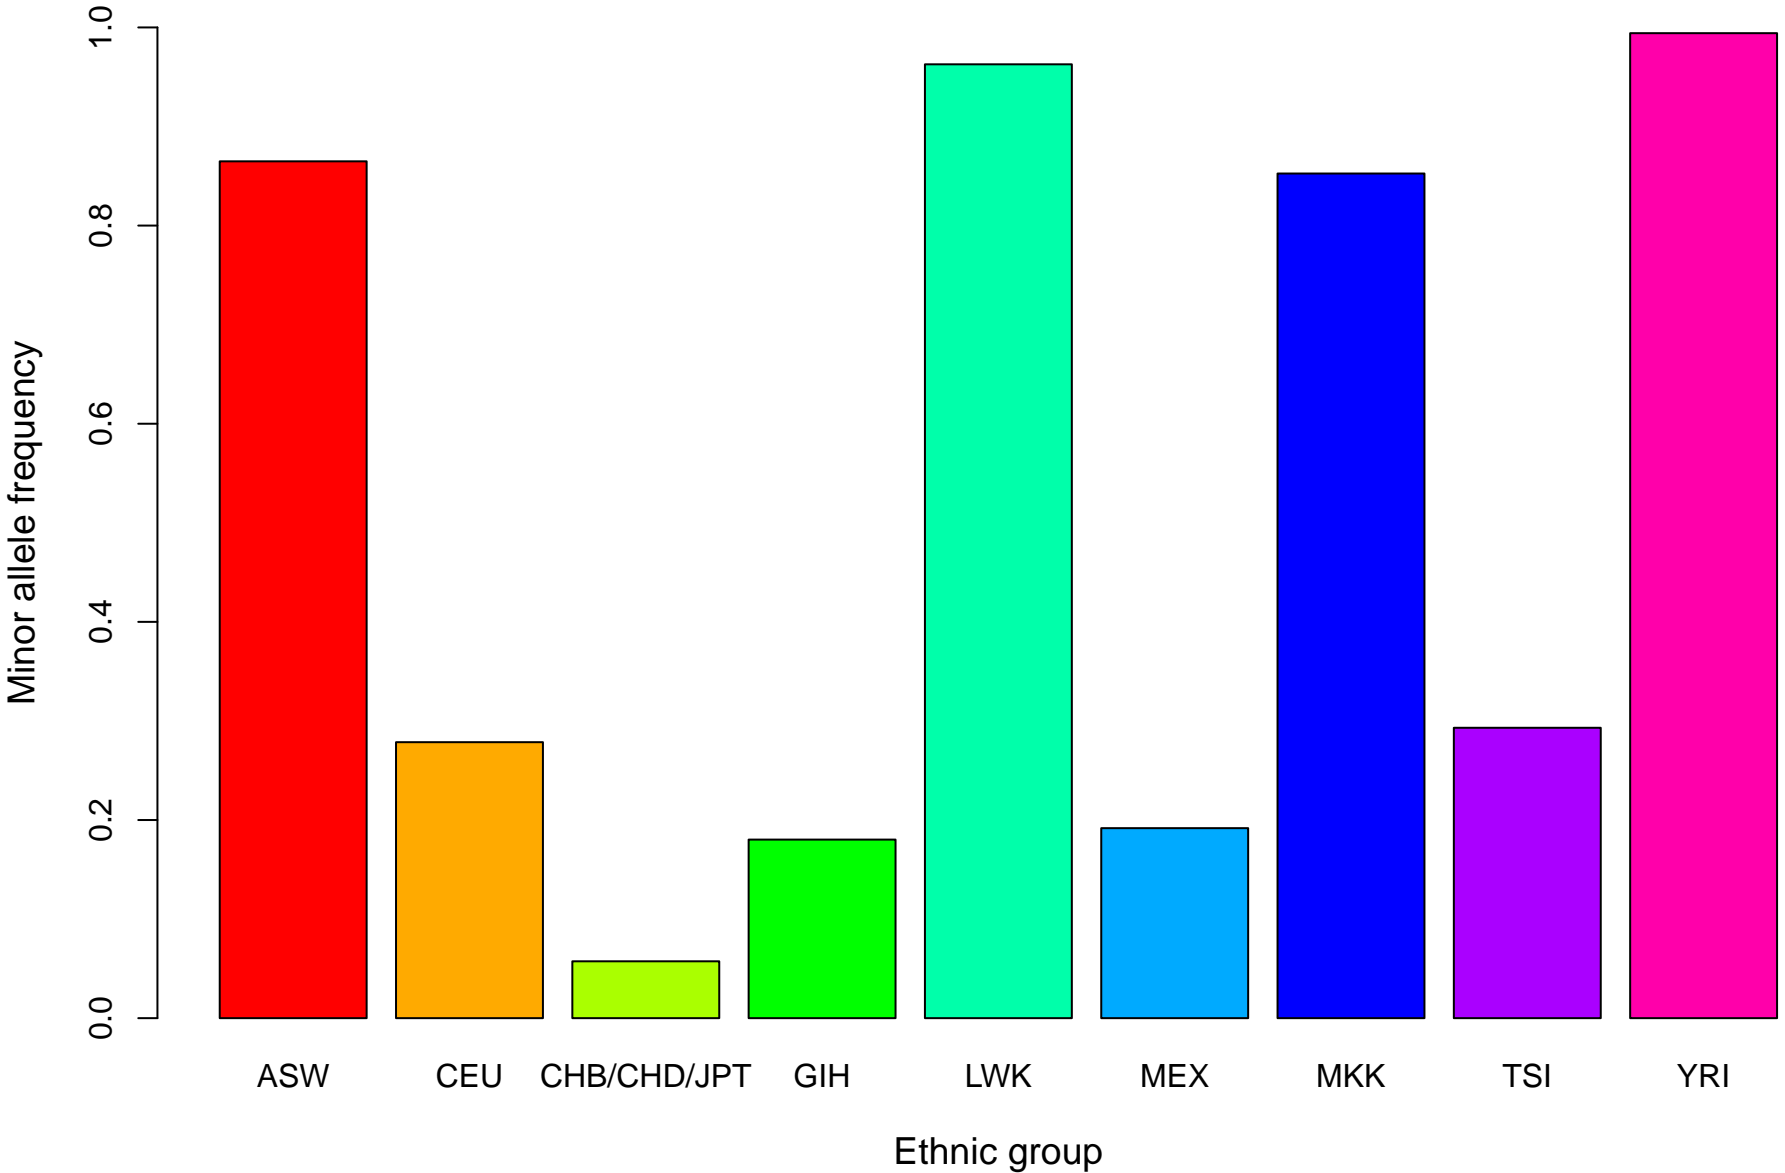

# rs974828\_T

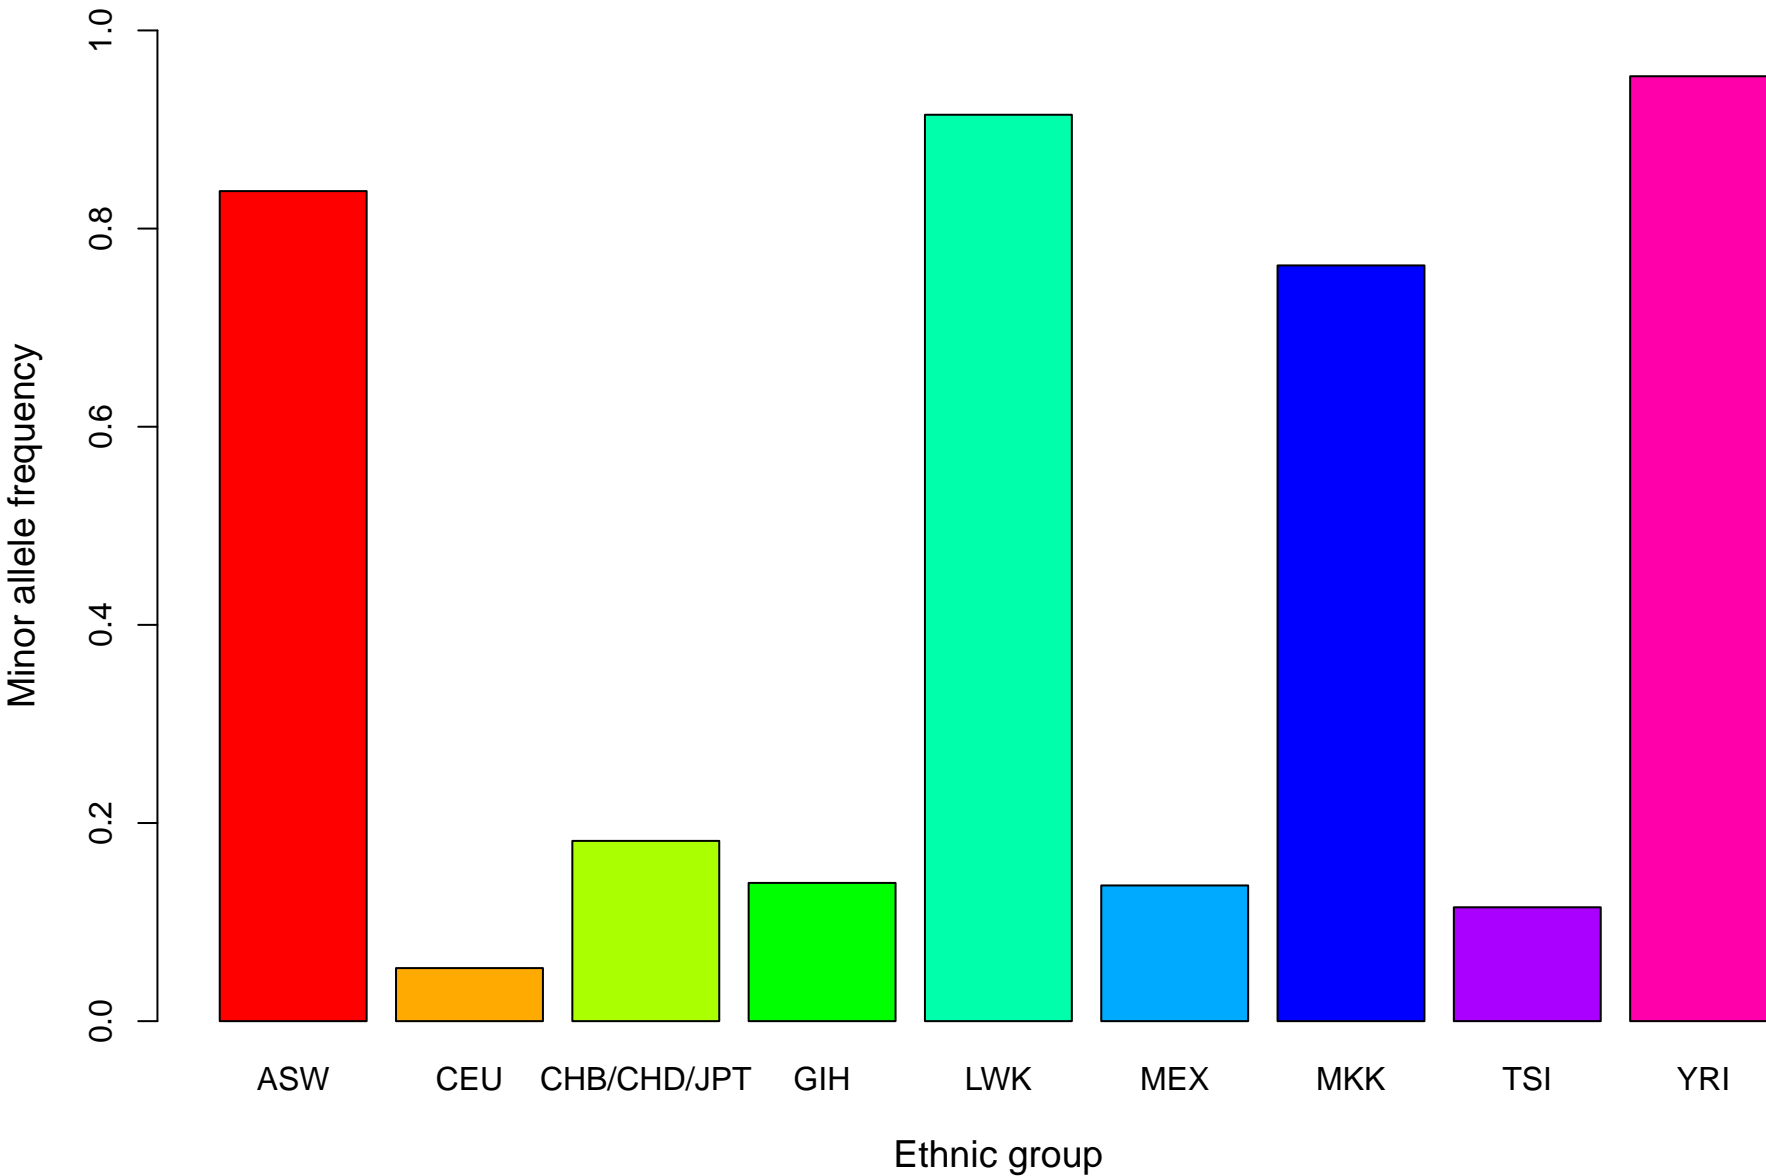

# rs1479207\_T

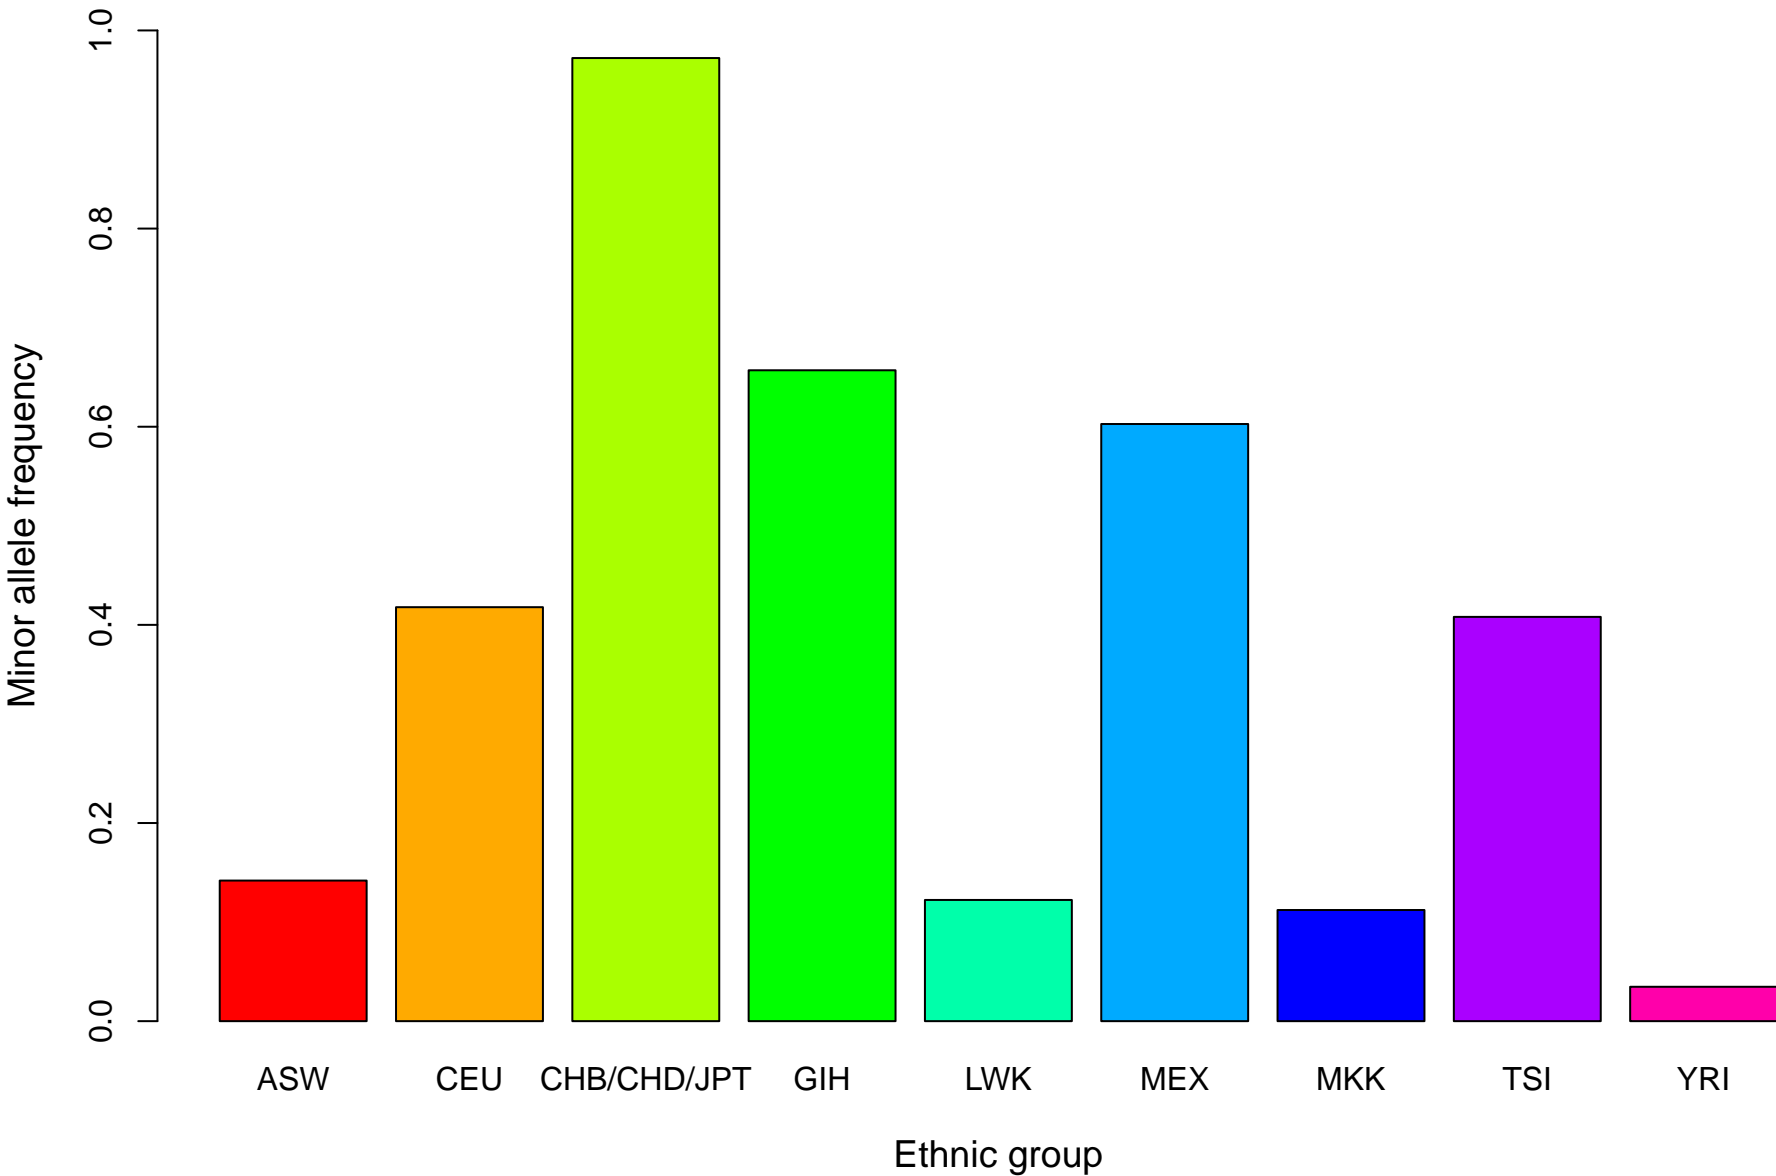

# rs387098\_G

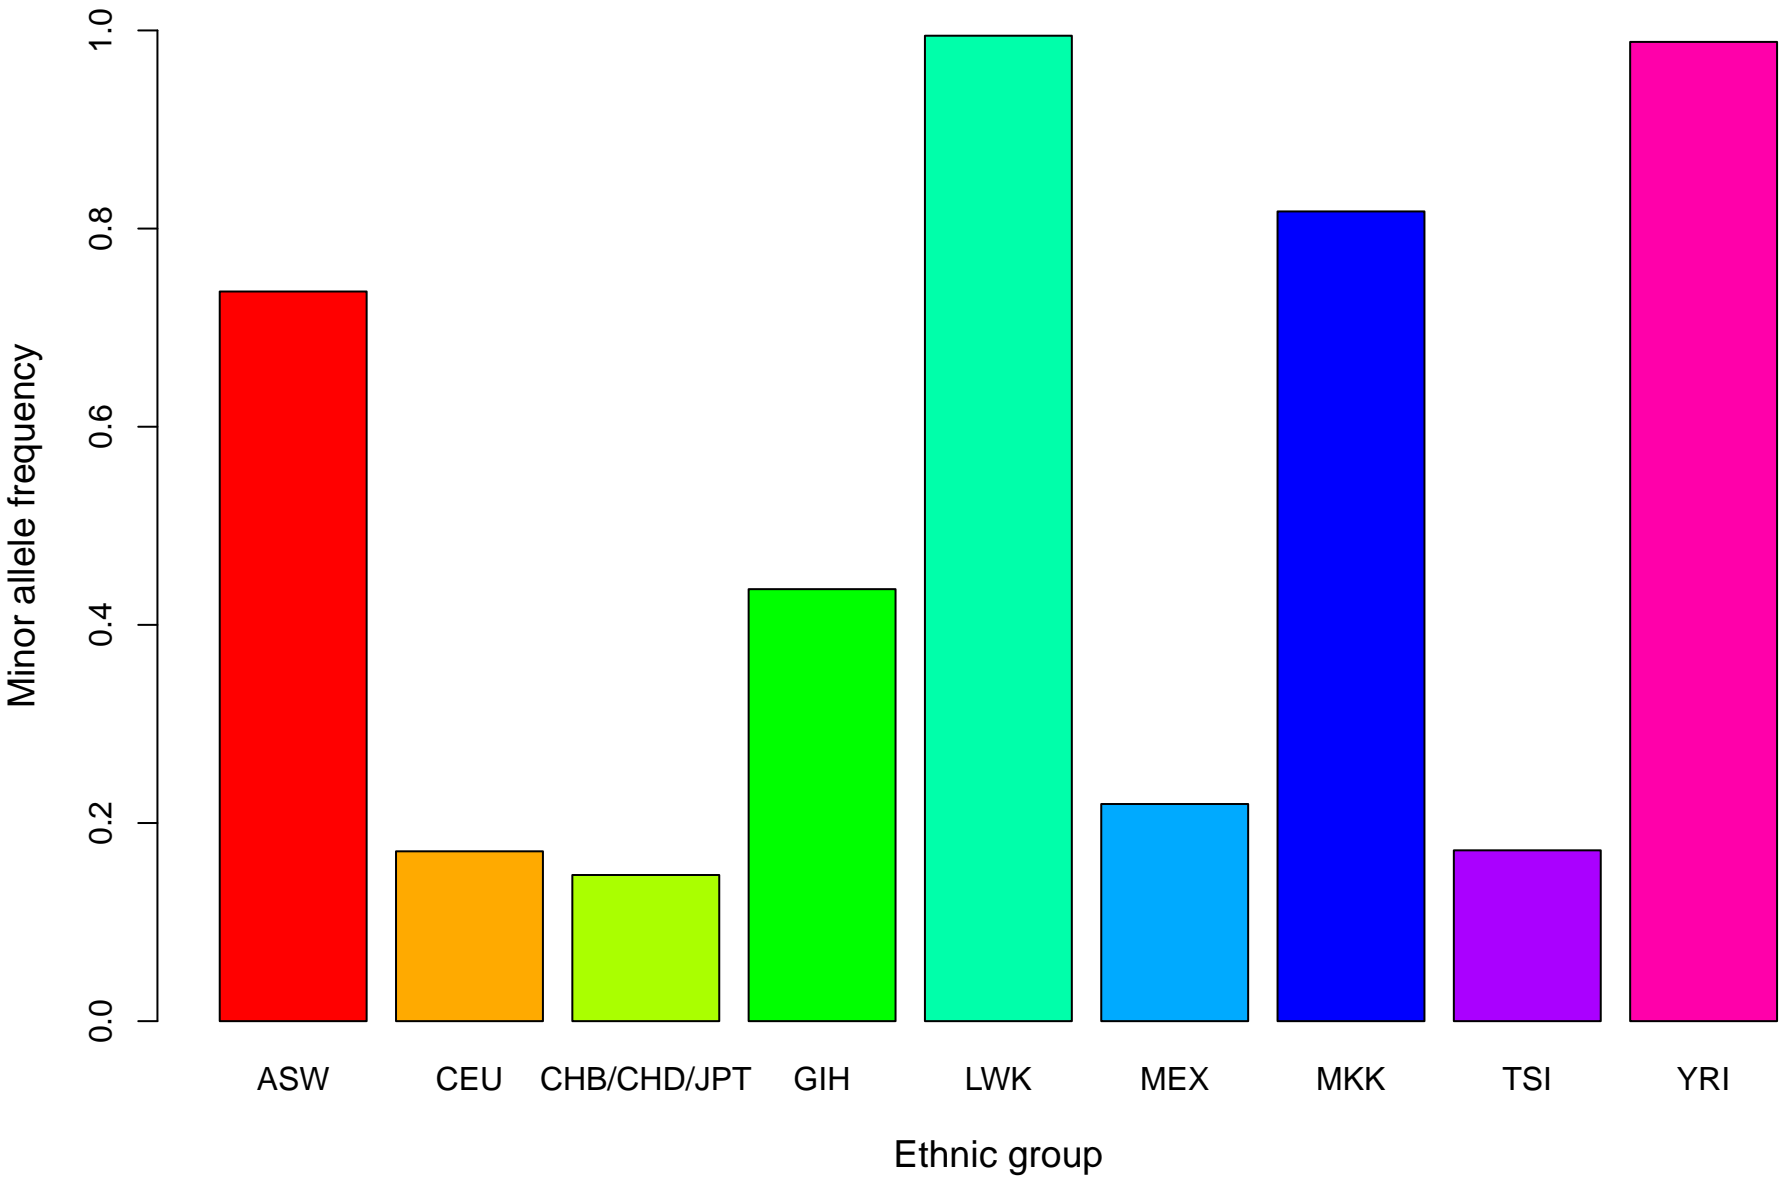



# rs1465465\_A

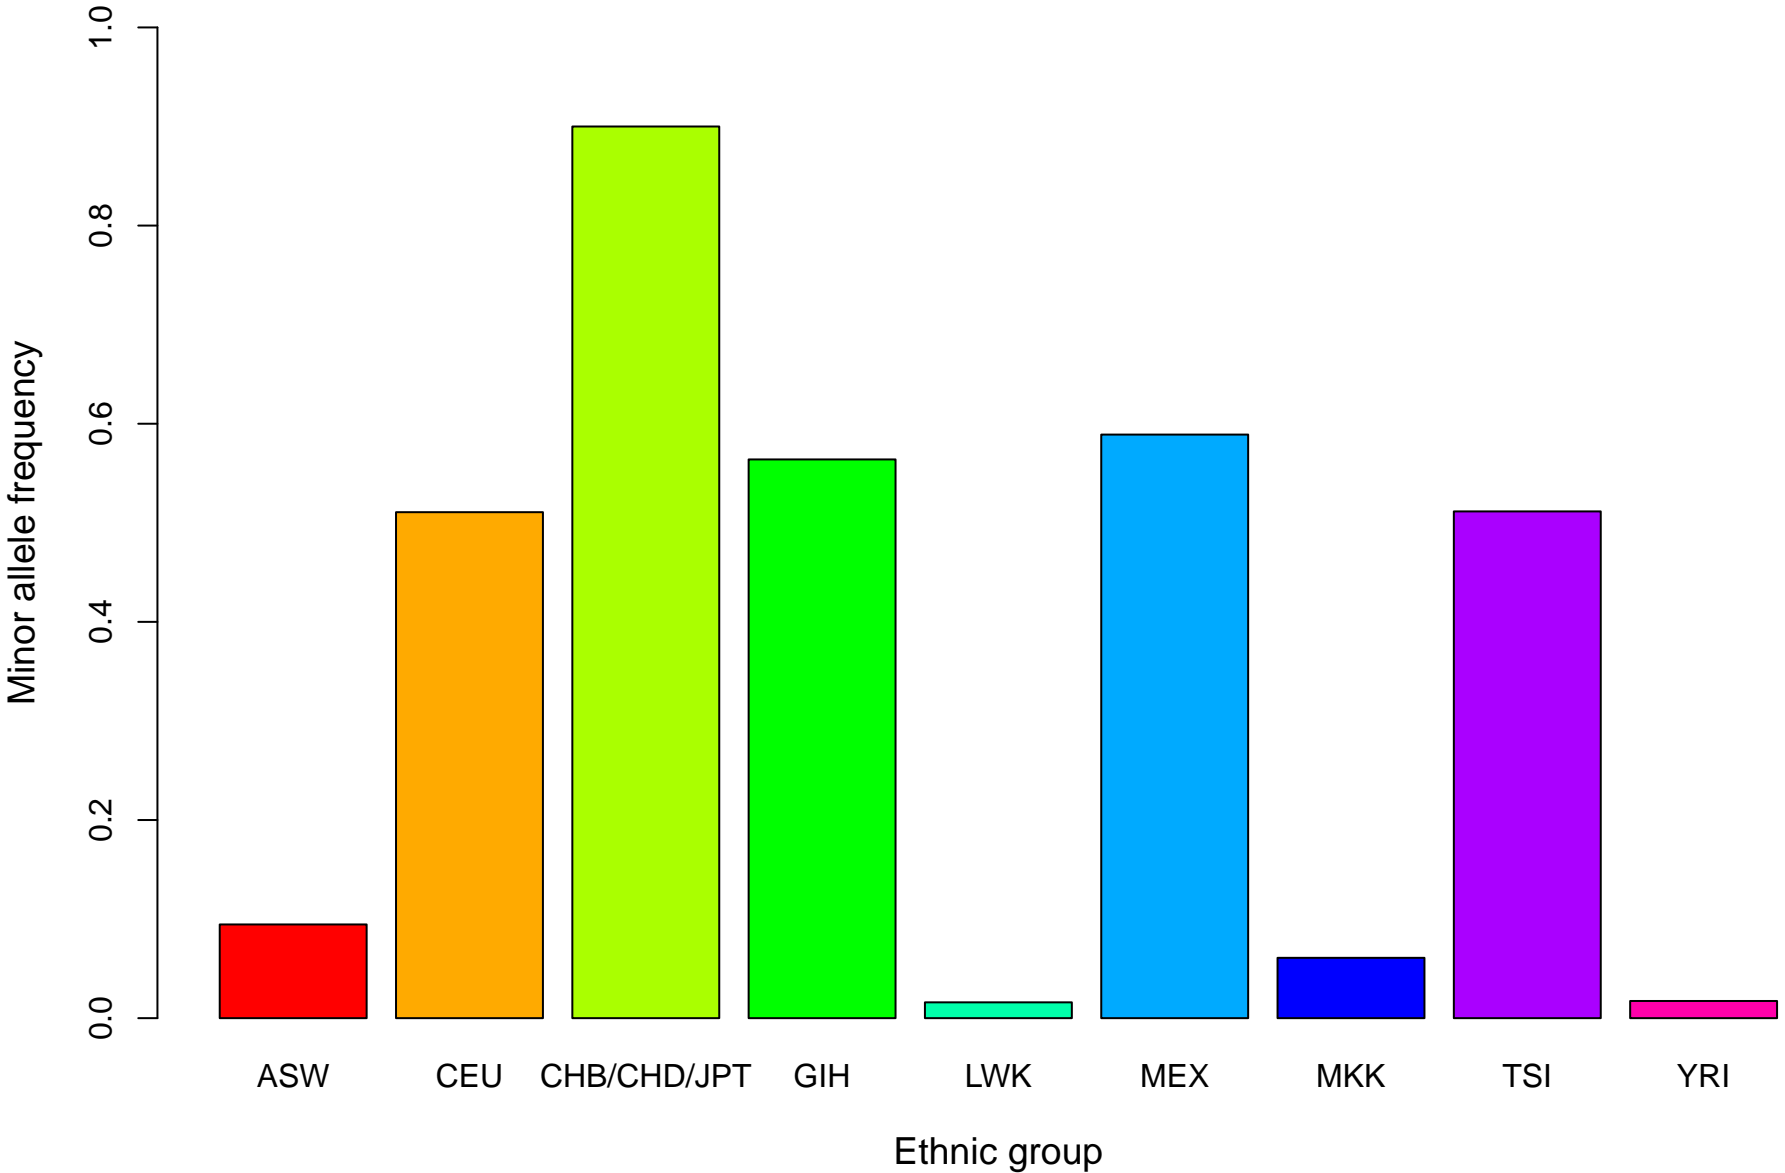

# rs6793627\_T

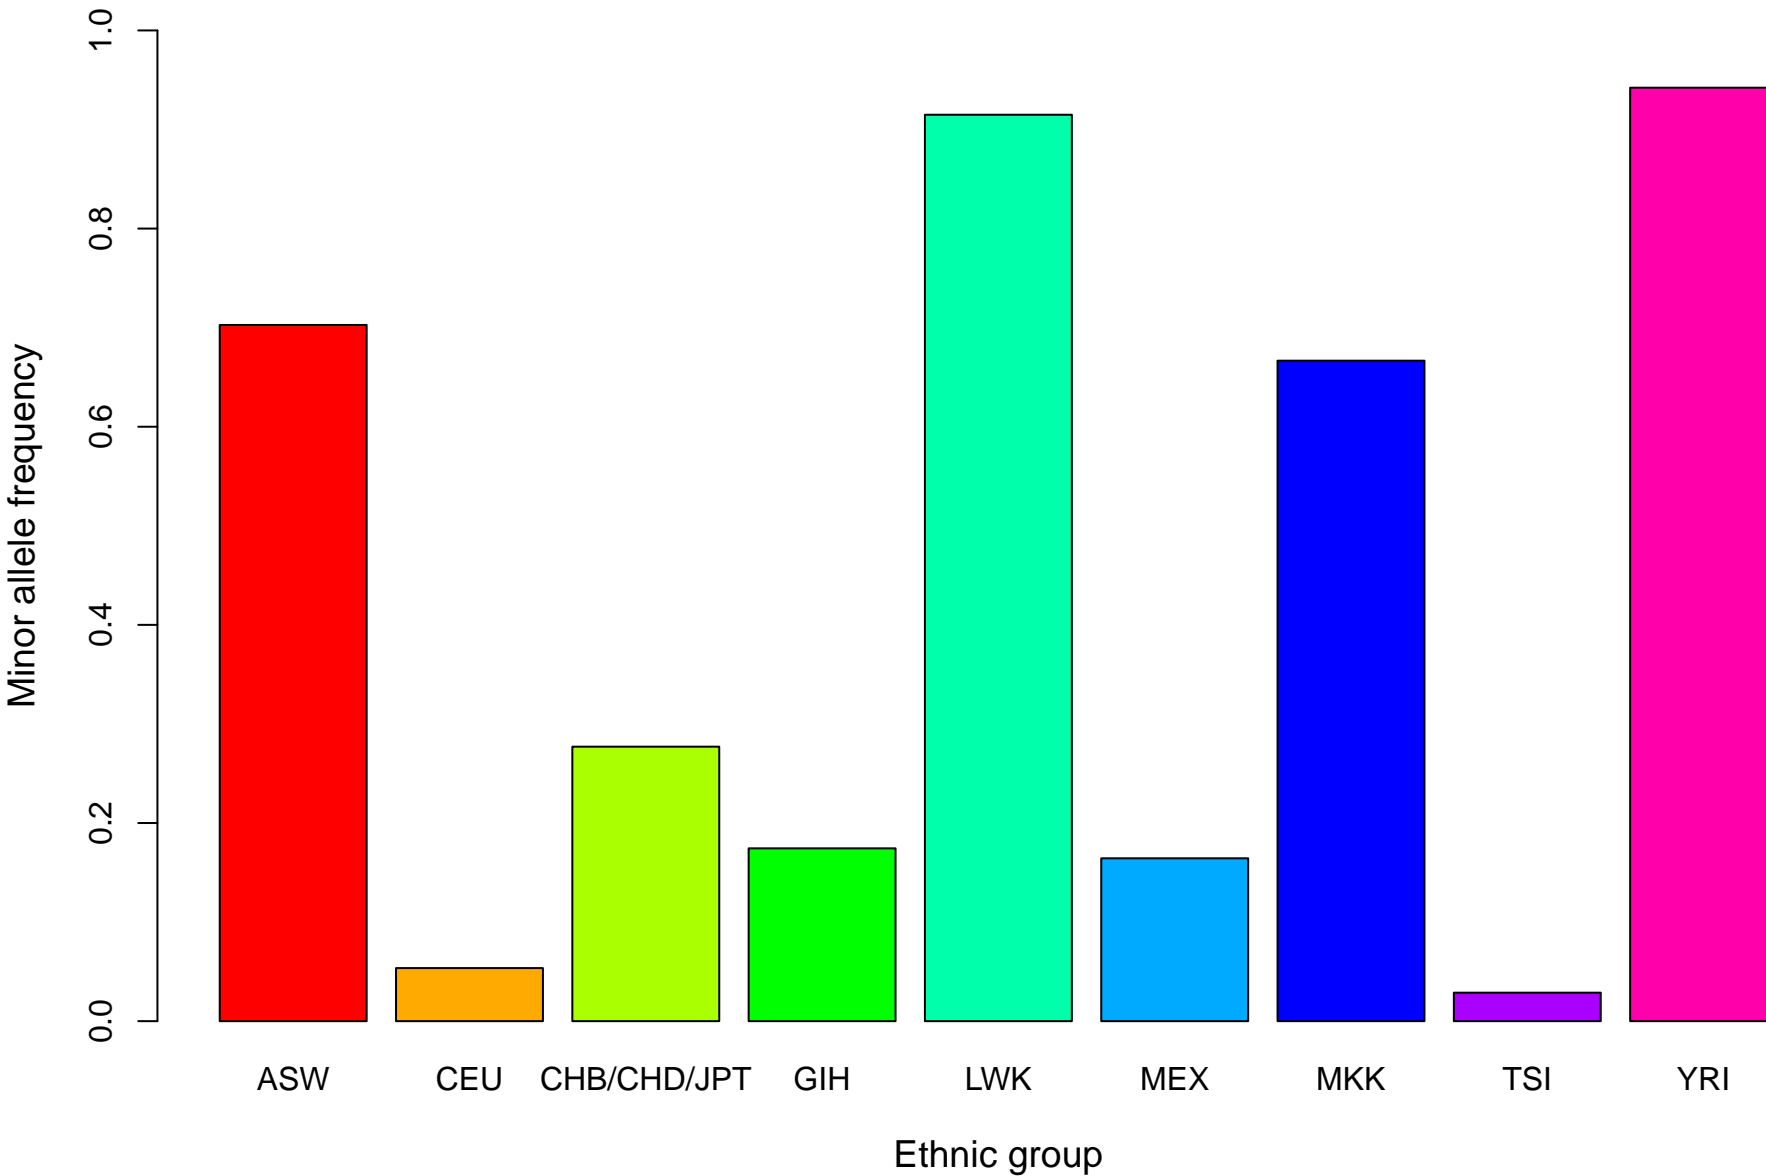

# rs2032289\_G

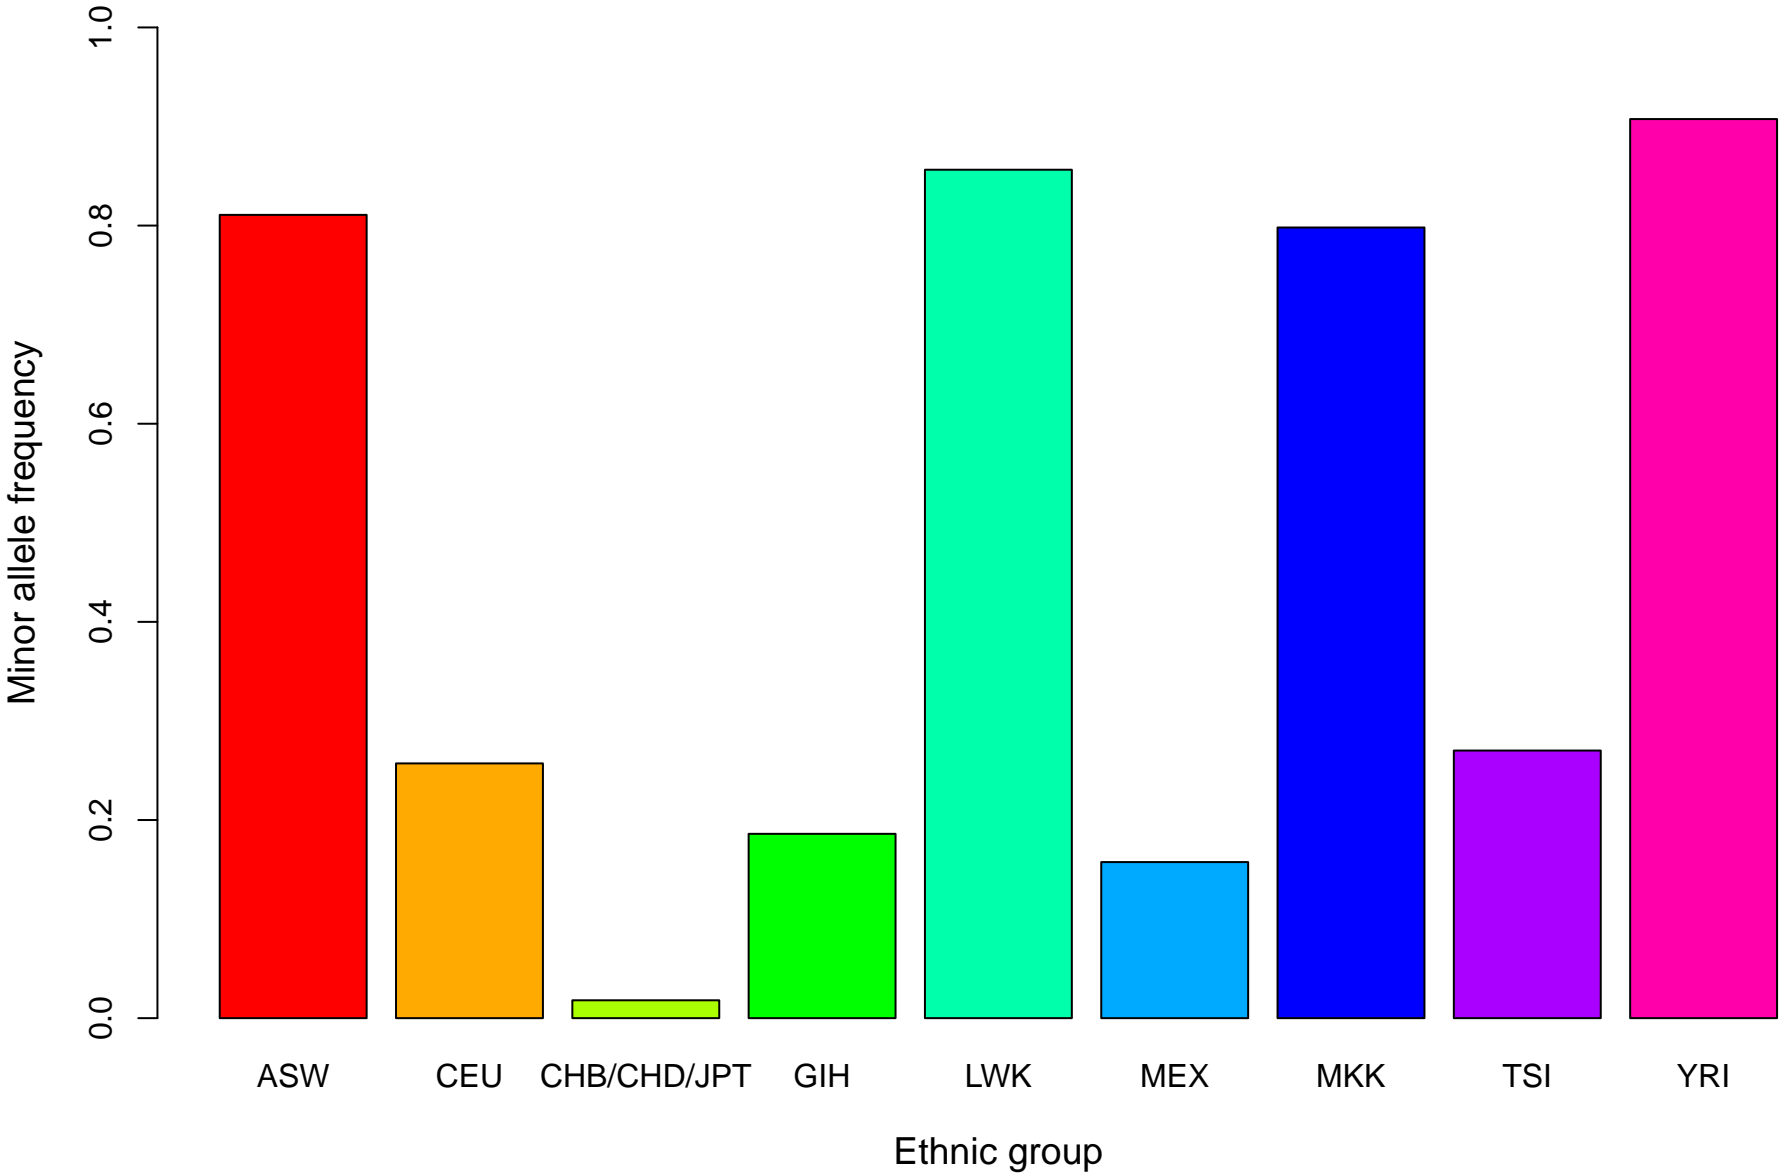

# rs2426714\_G

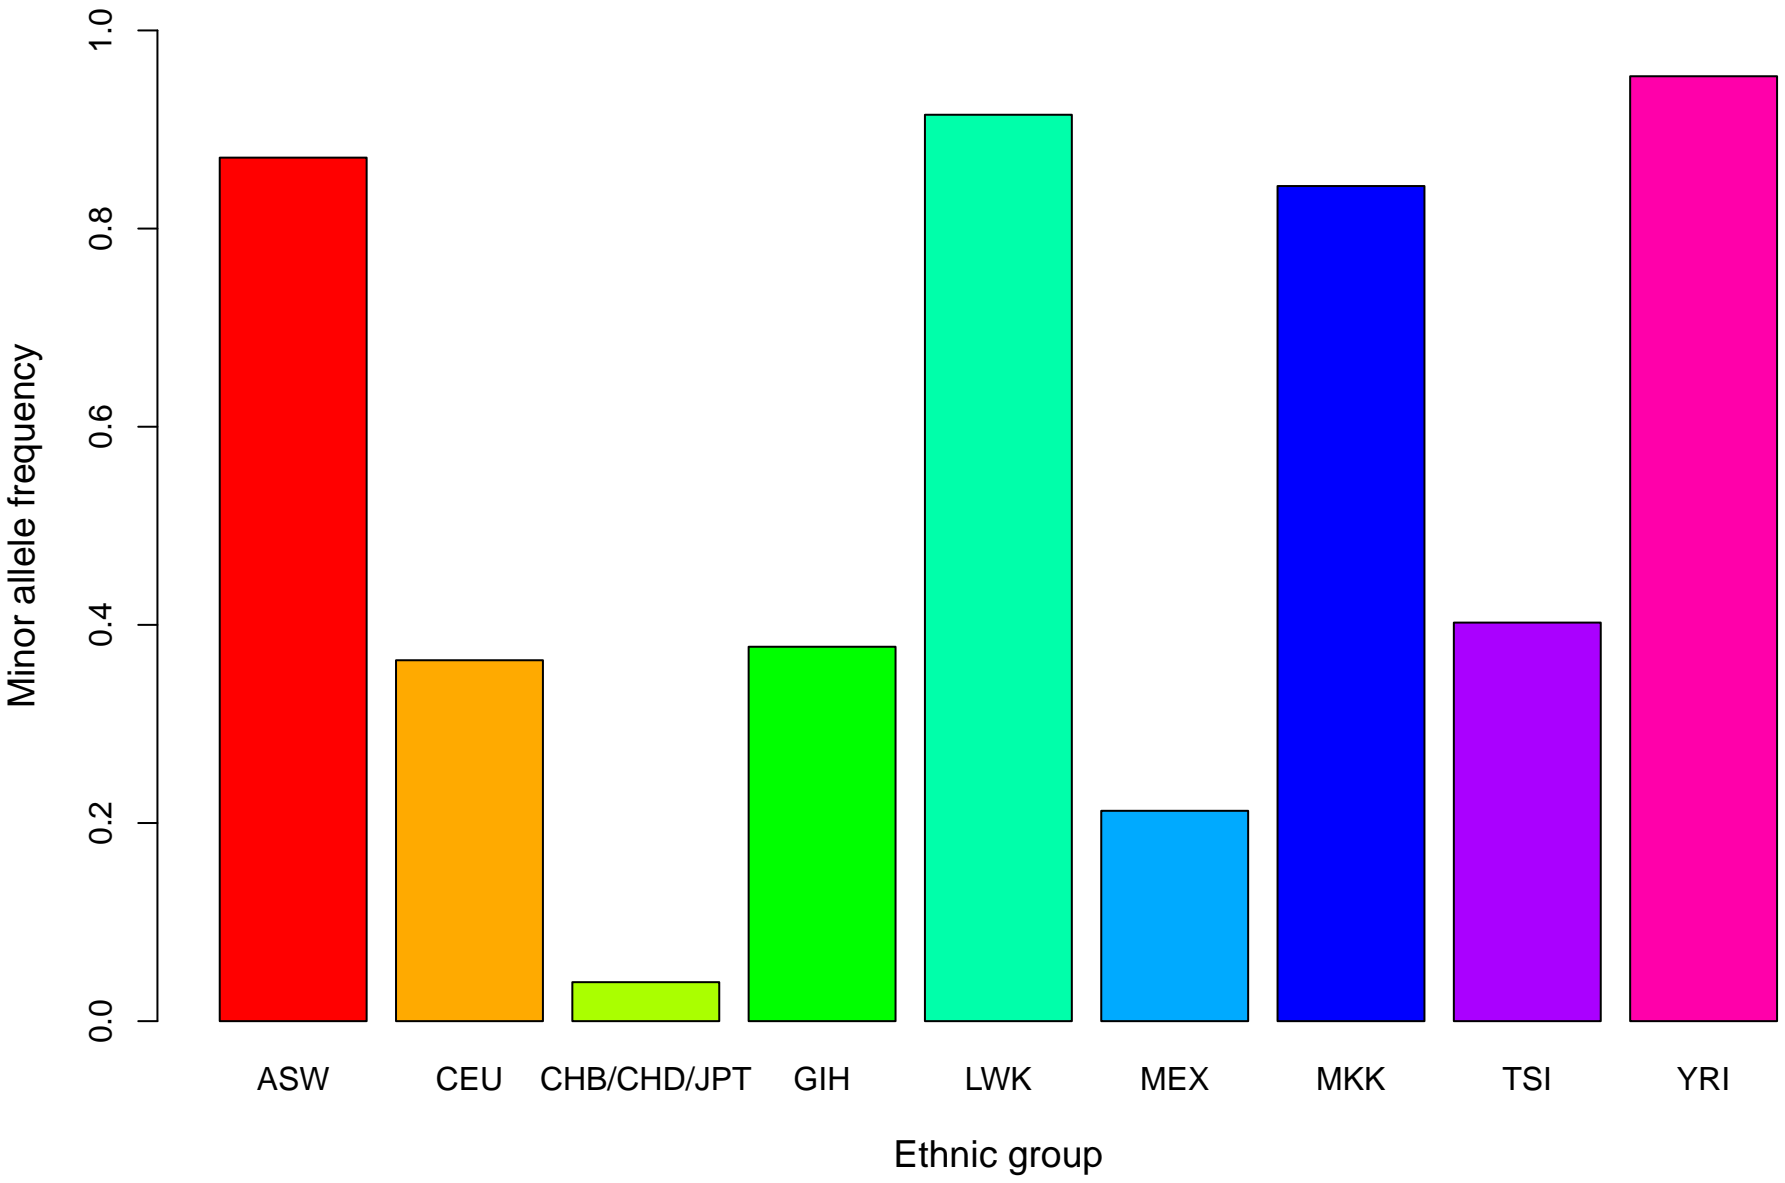

# rs10254610\_A

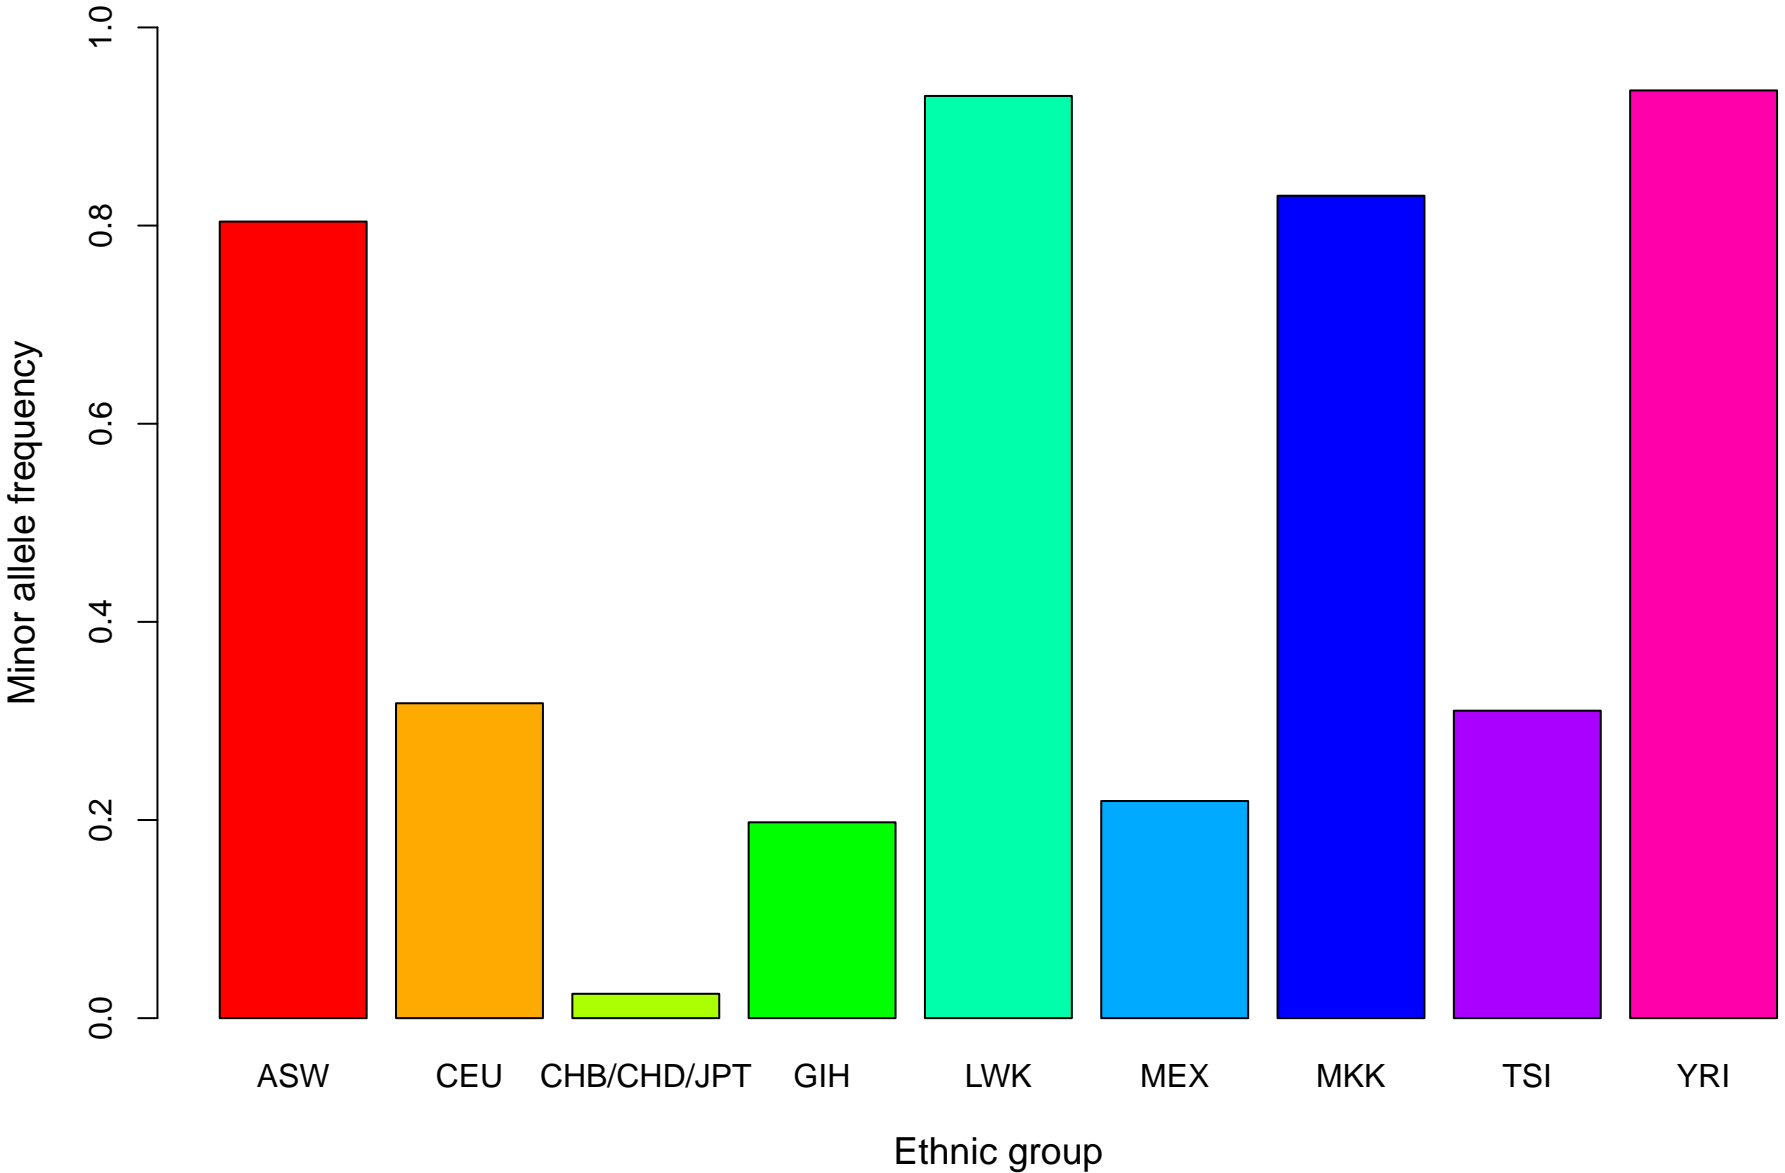

# rs8079220\_T

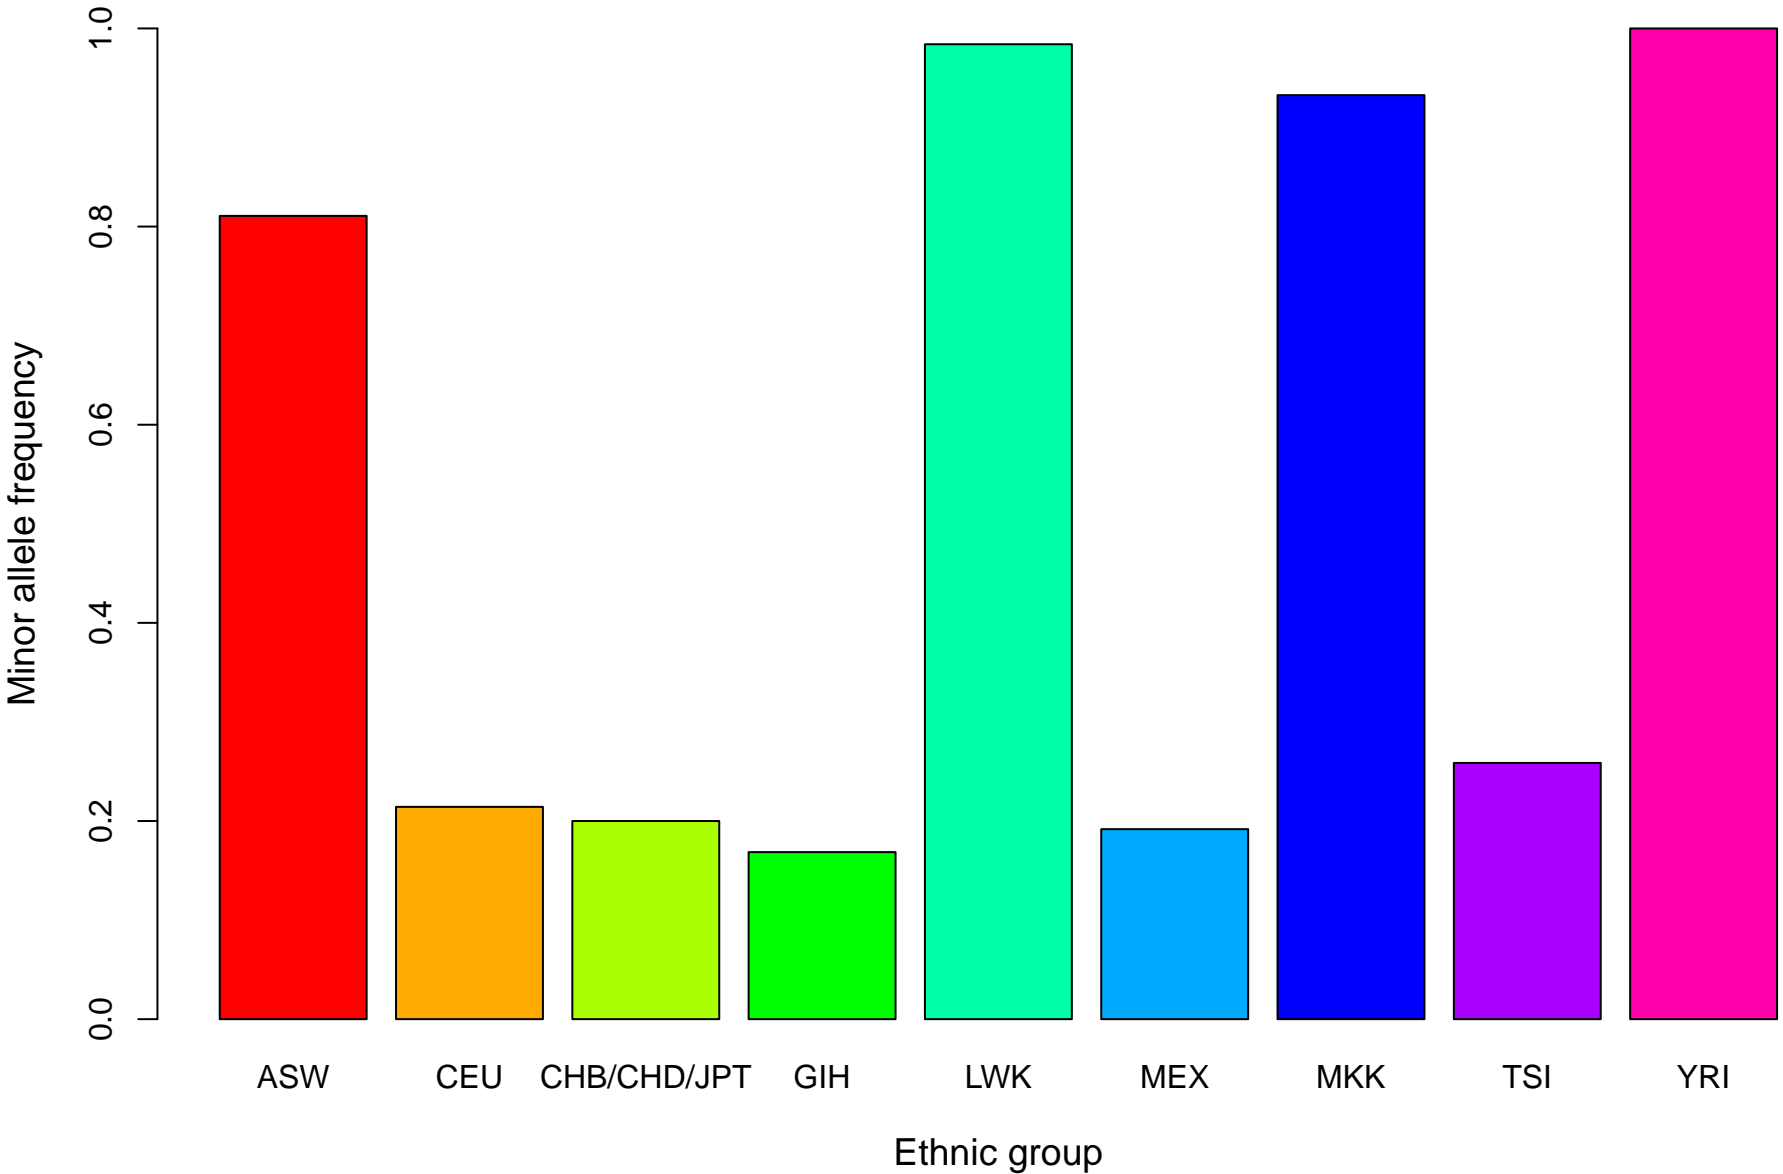

# rs7719786\_A

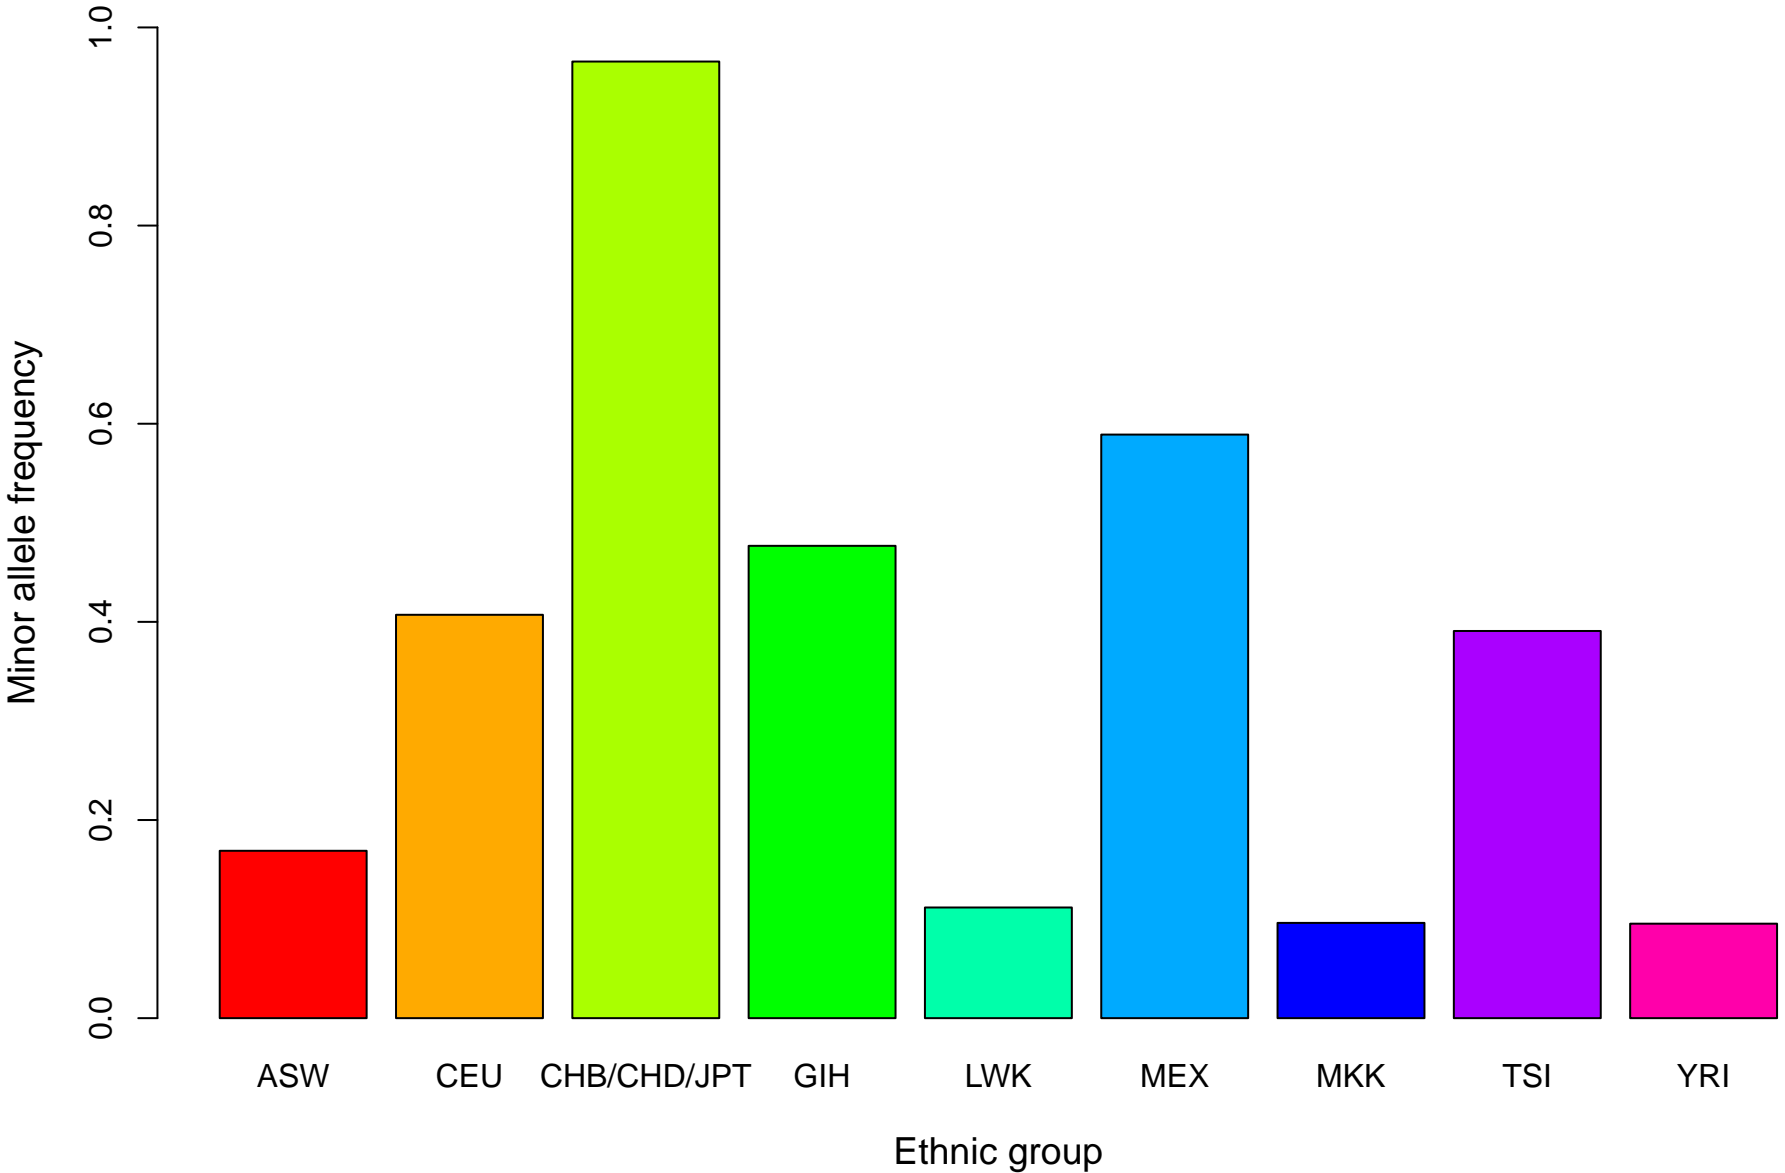

# rs7181268\_G

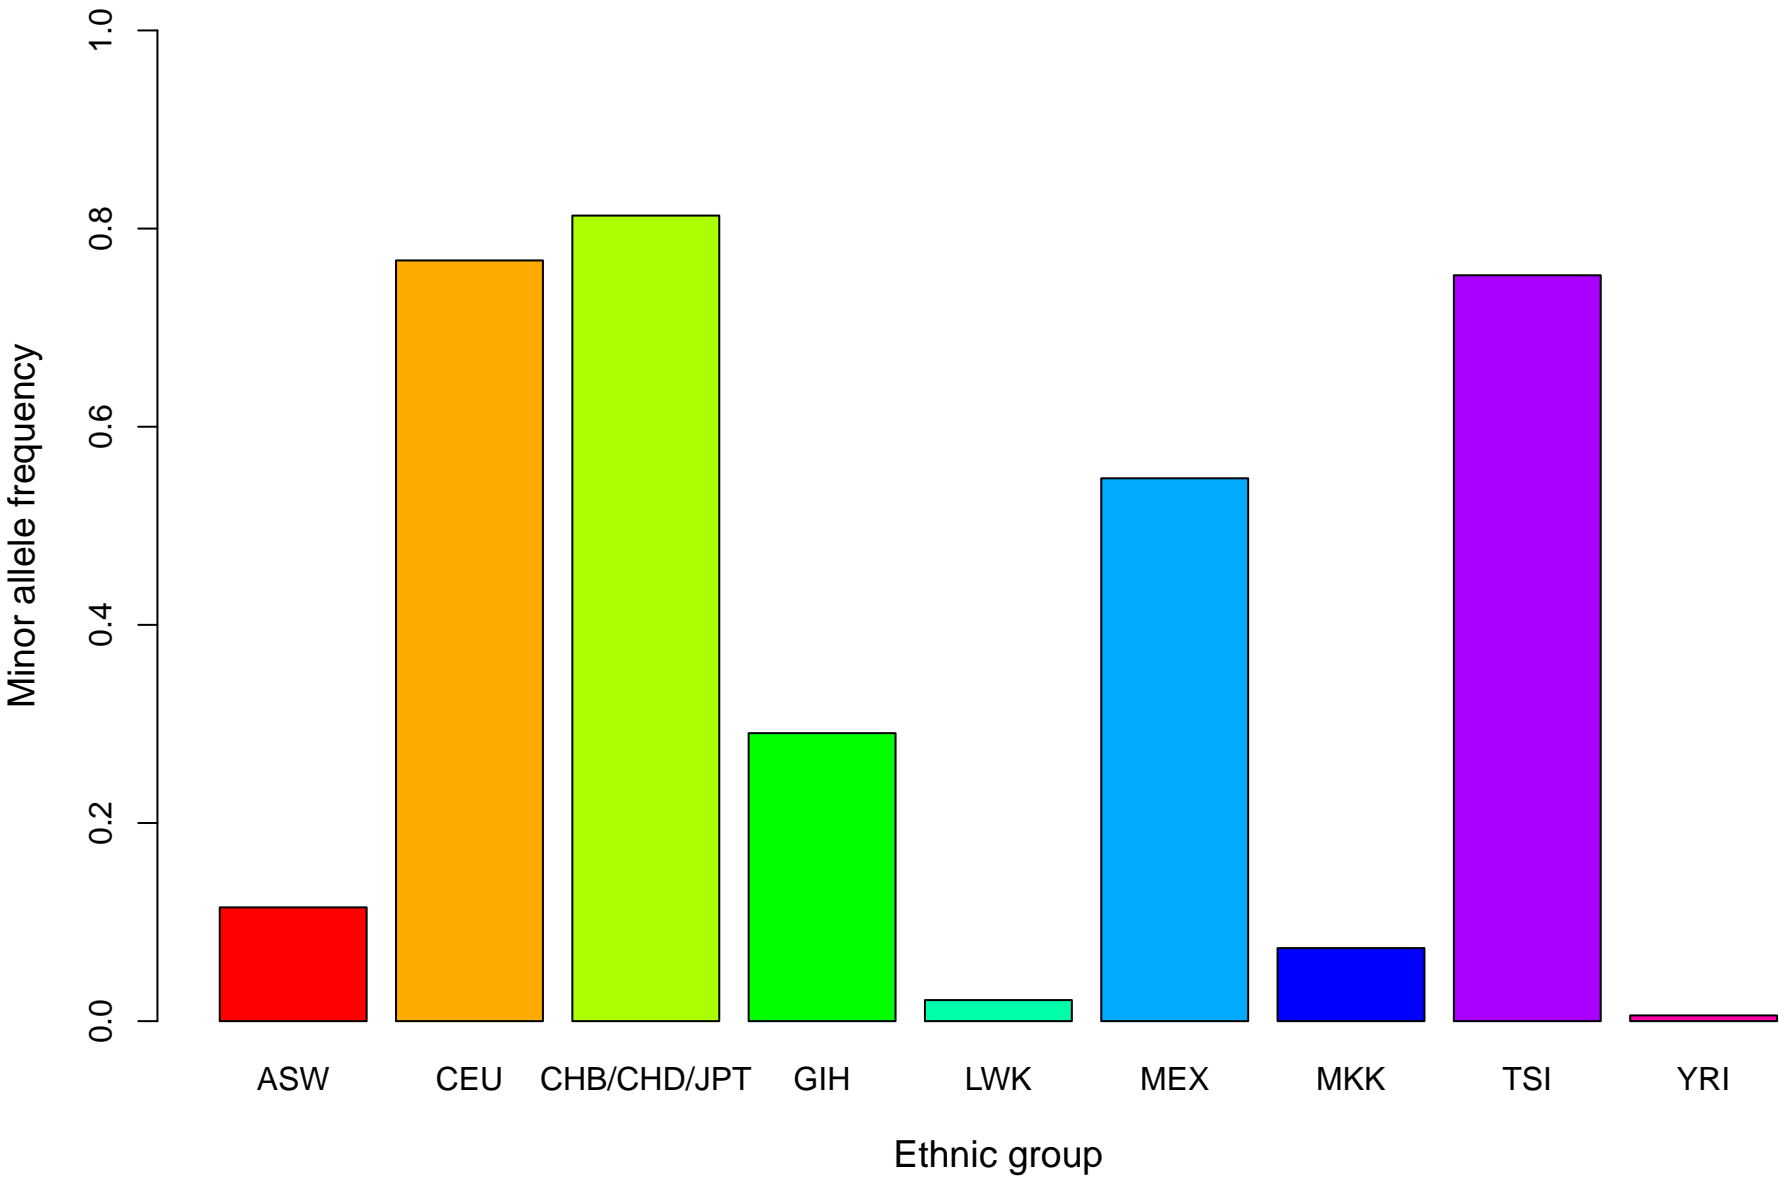



# rs1167827\_A

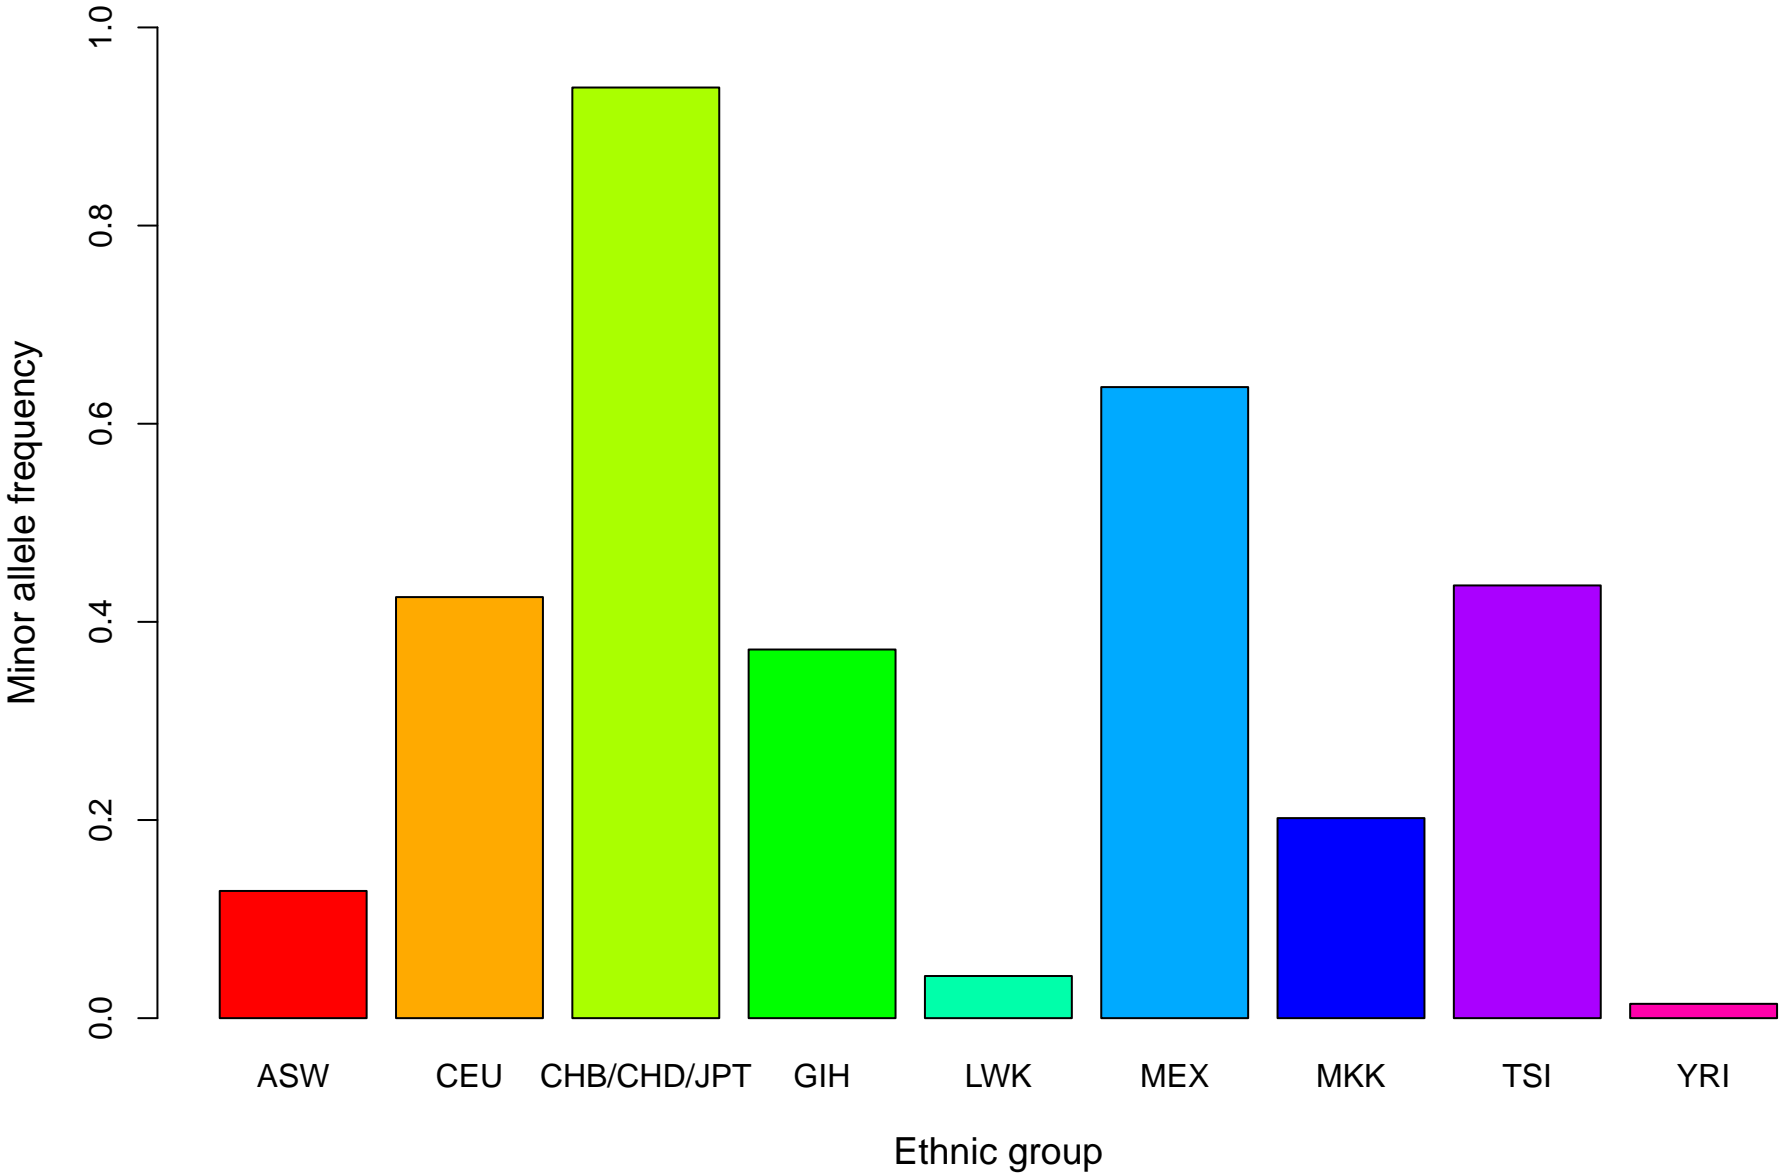

# rs10833134\_C

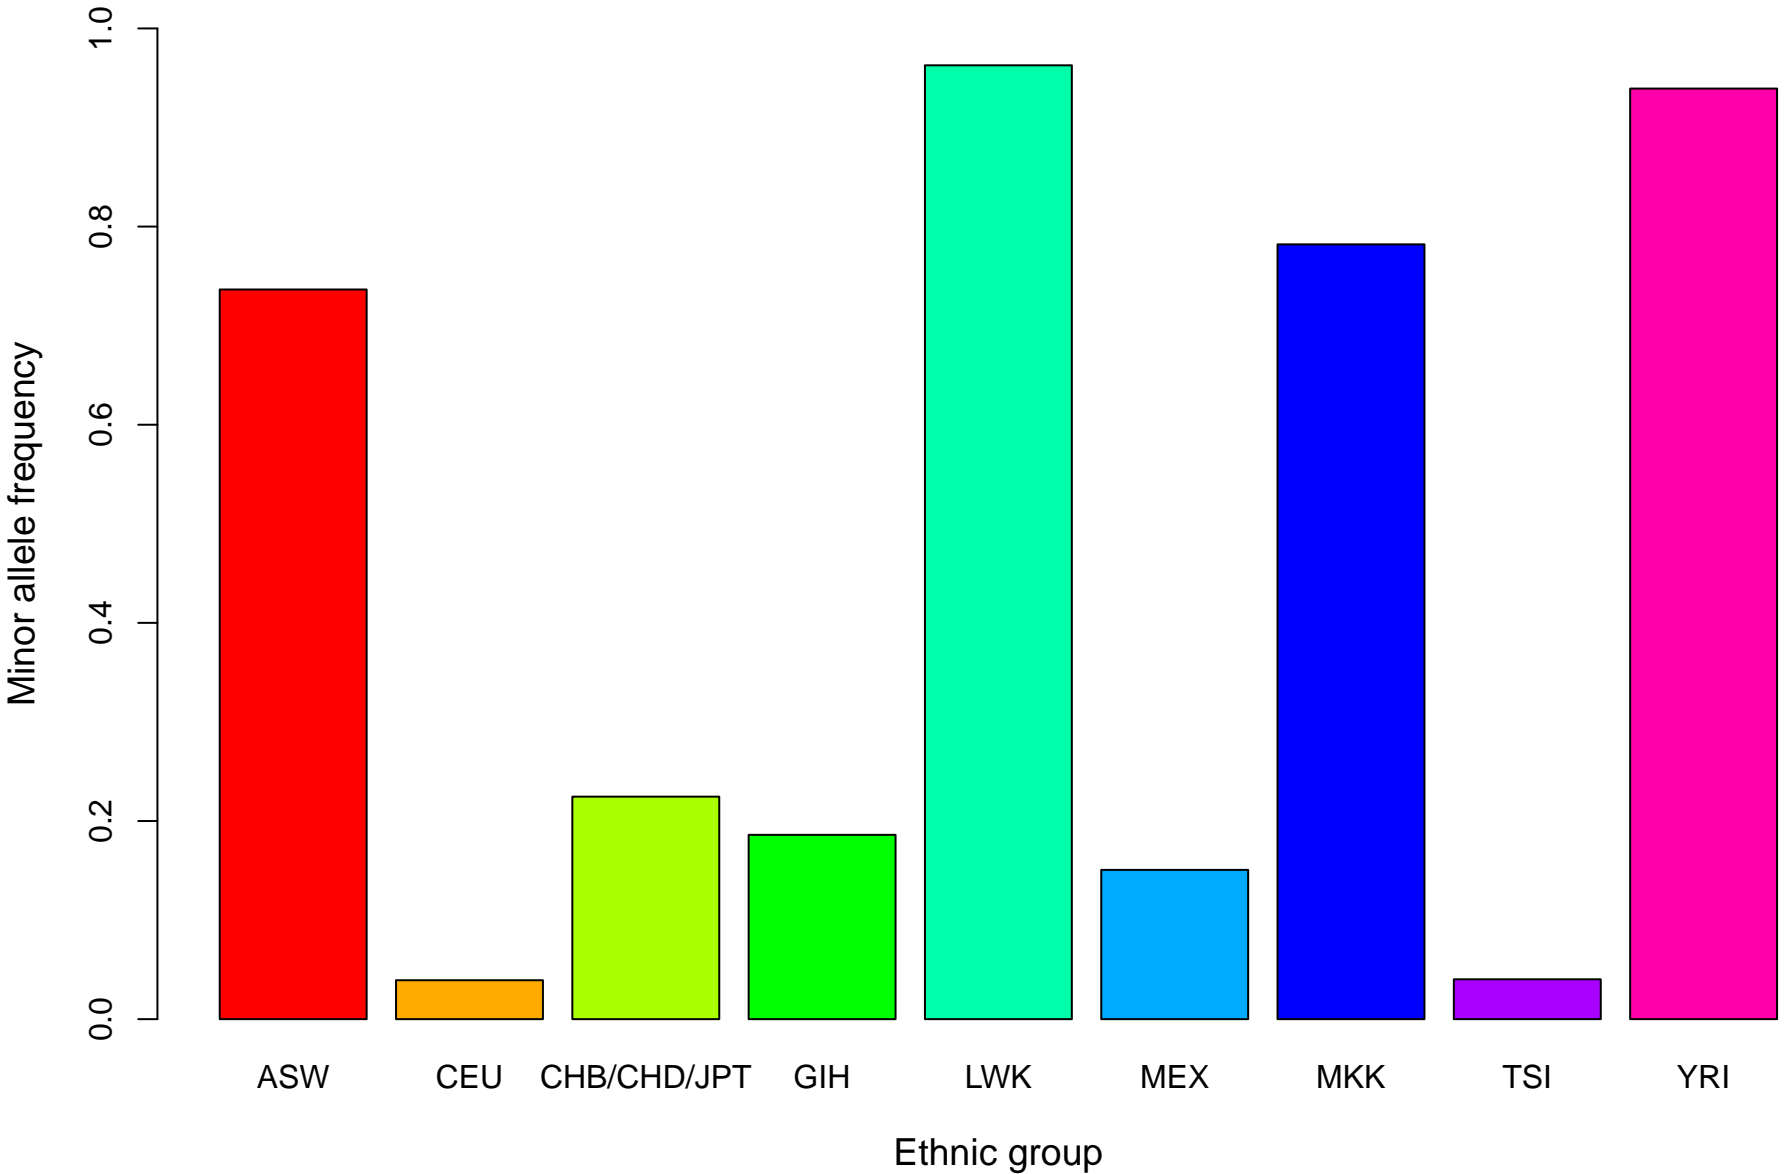

# rs11781122\_T

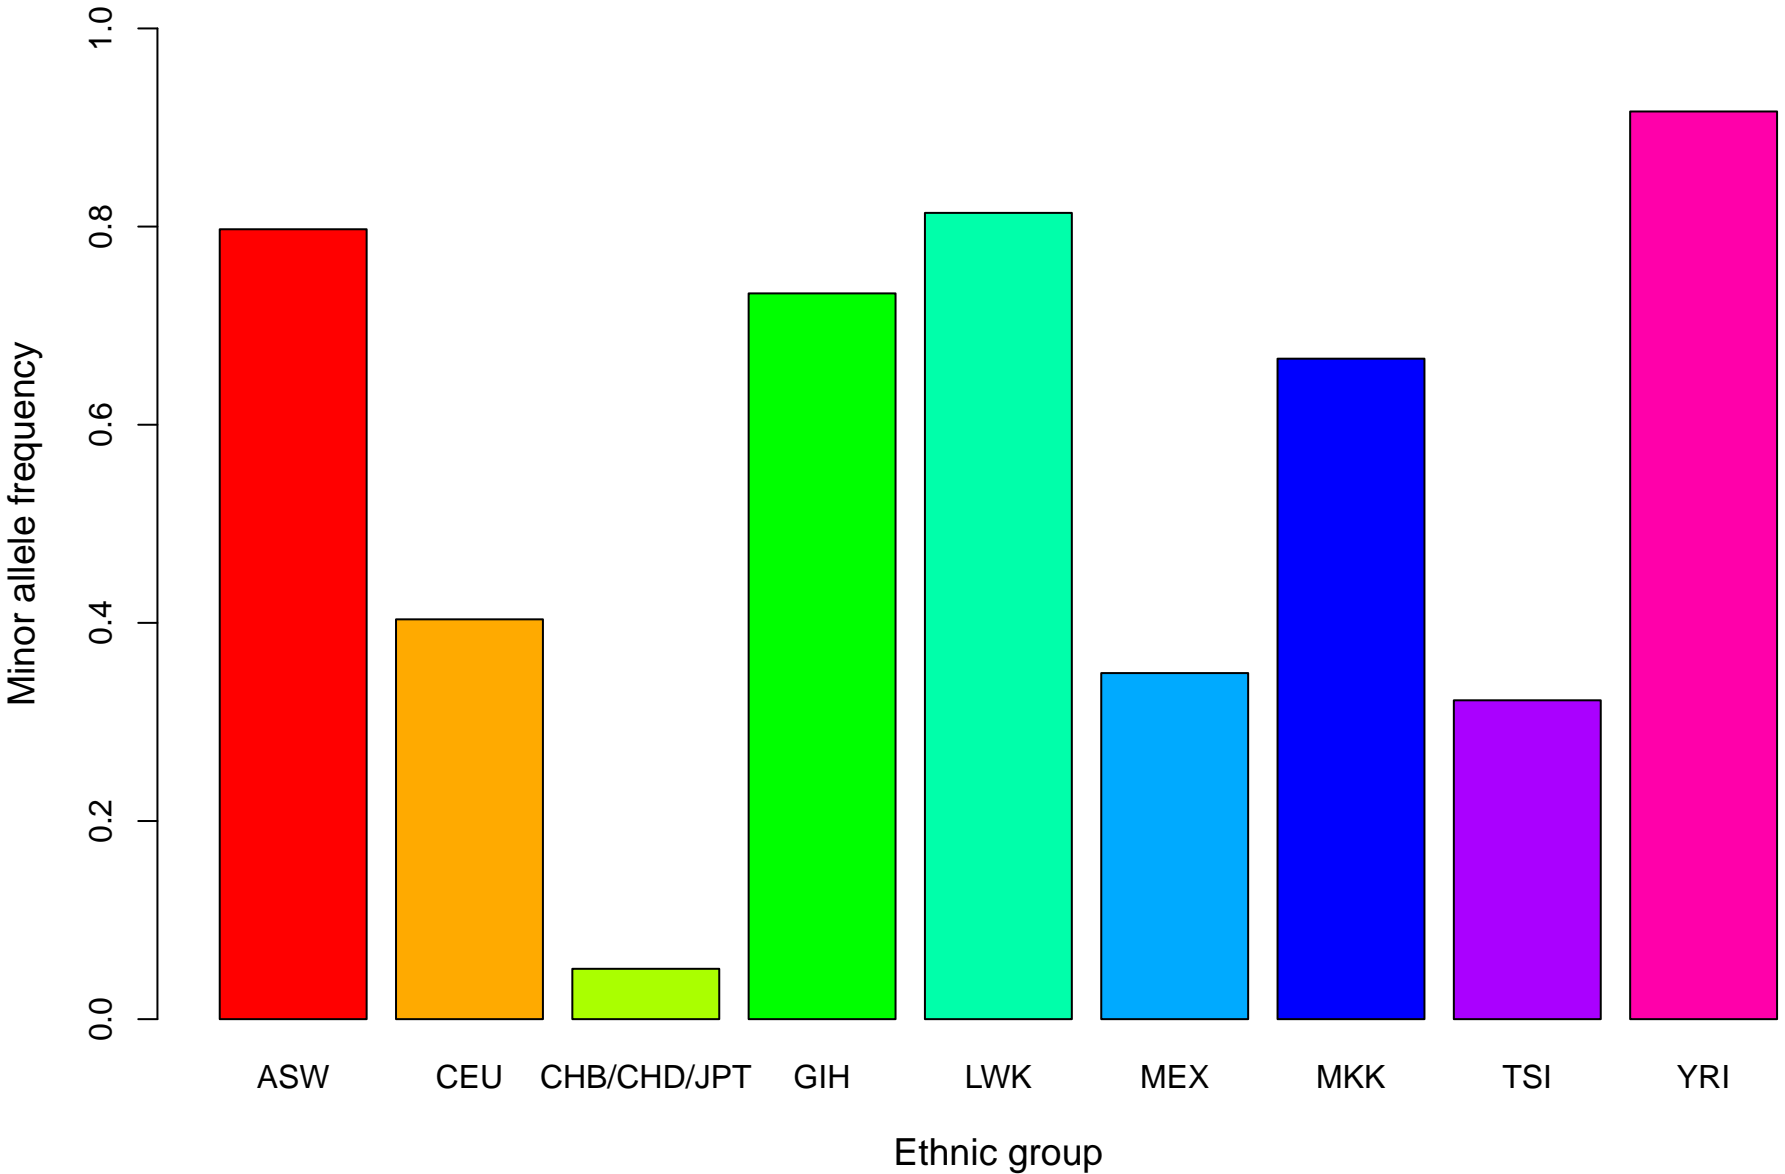

# rs2842063\_T

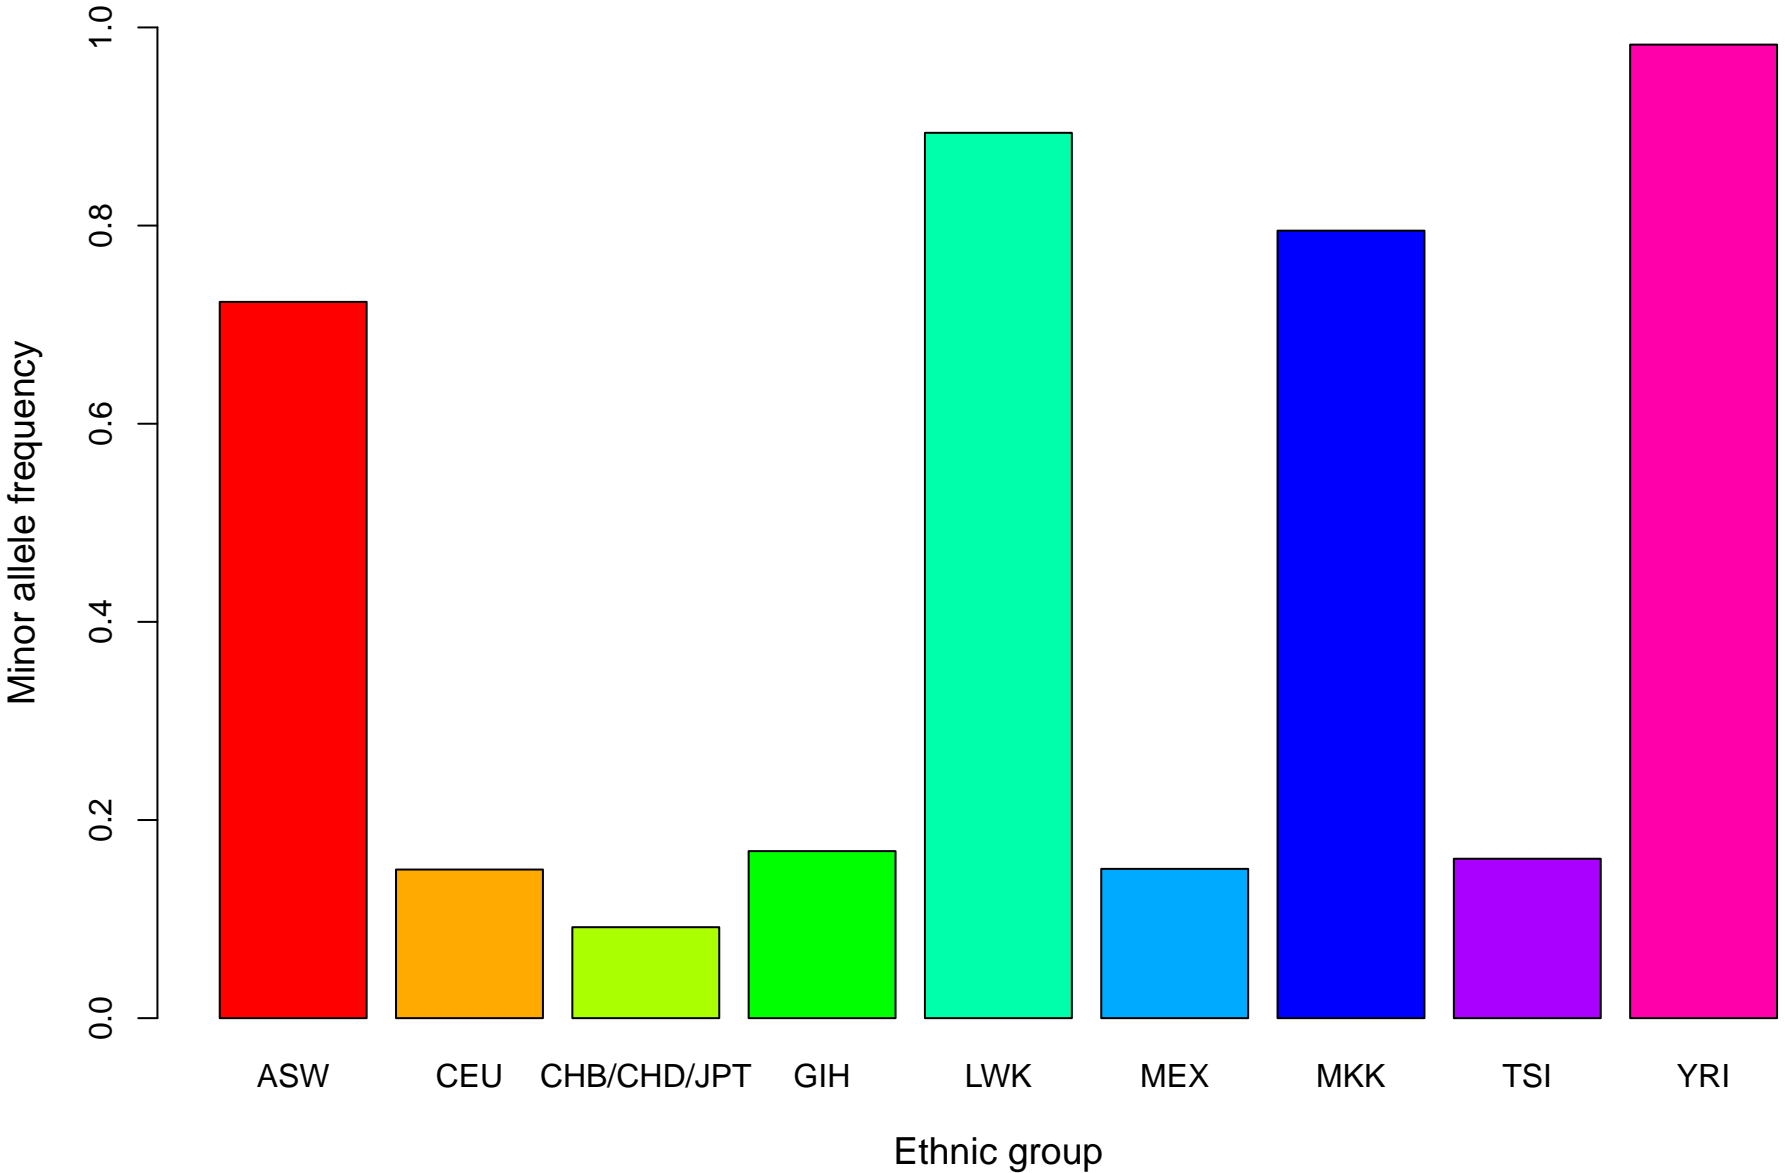

# rs7923368\_A

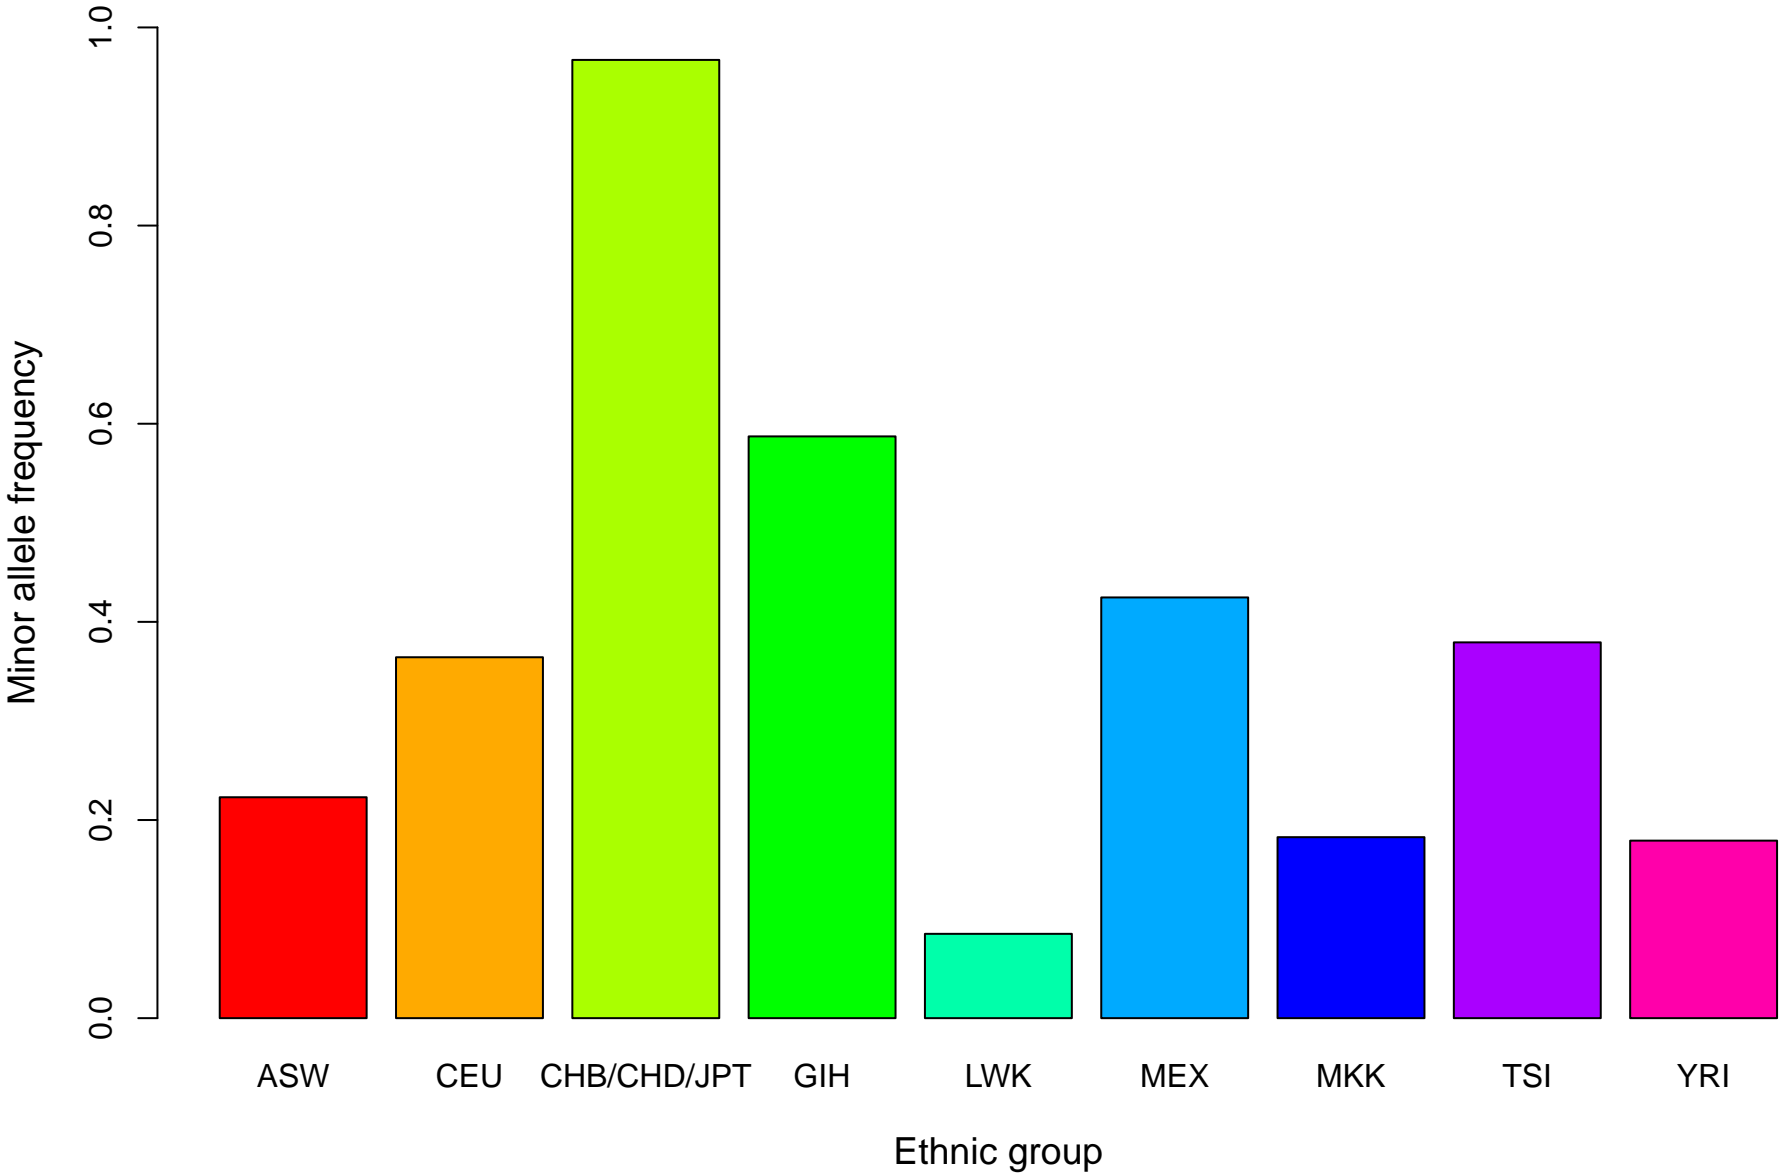

# rs1790099\_C

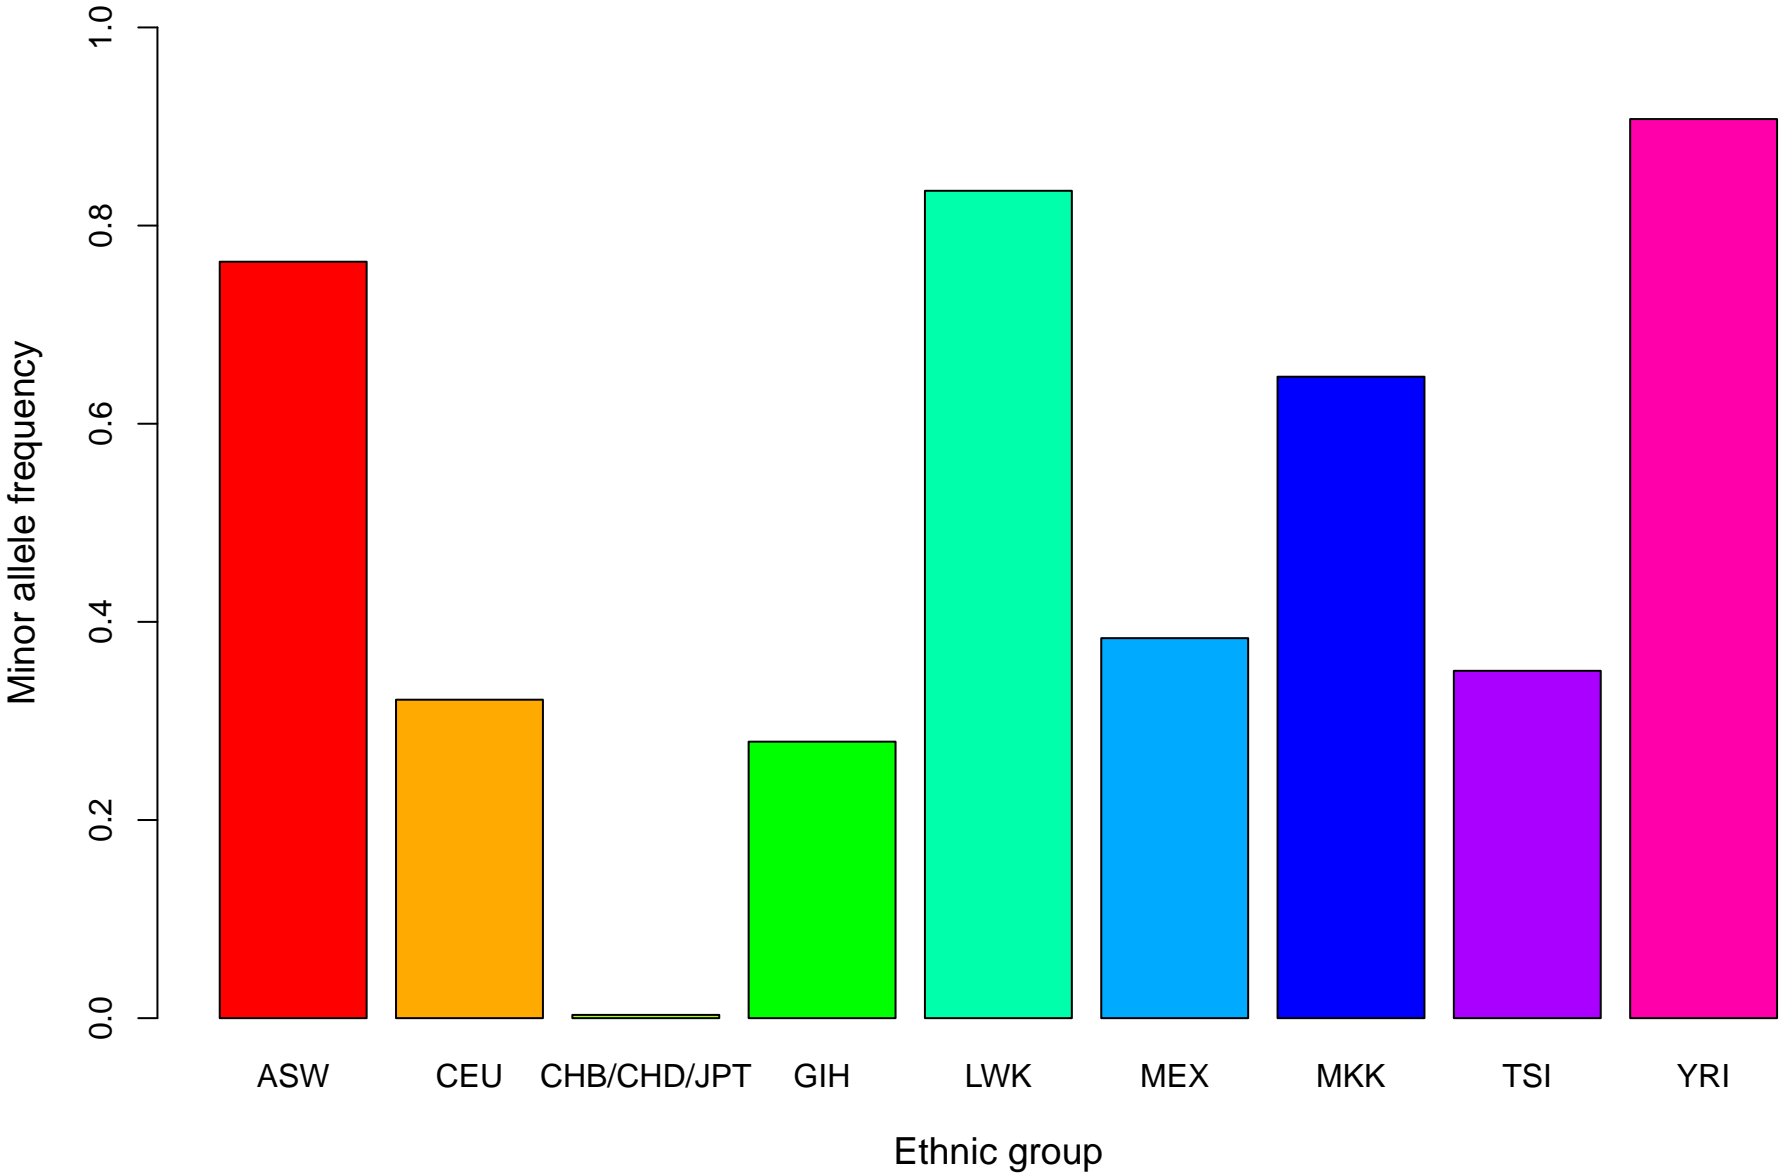

# rs7006789\_A

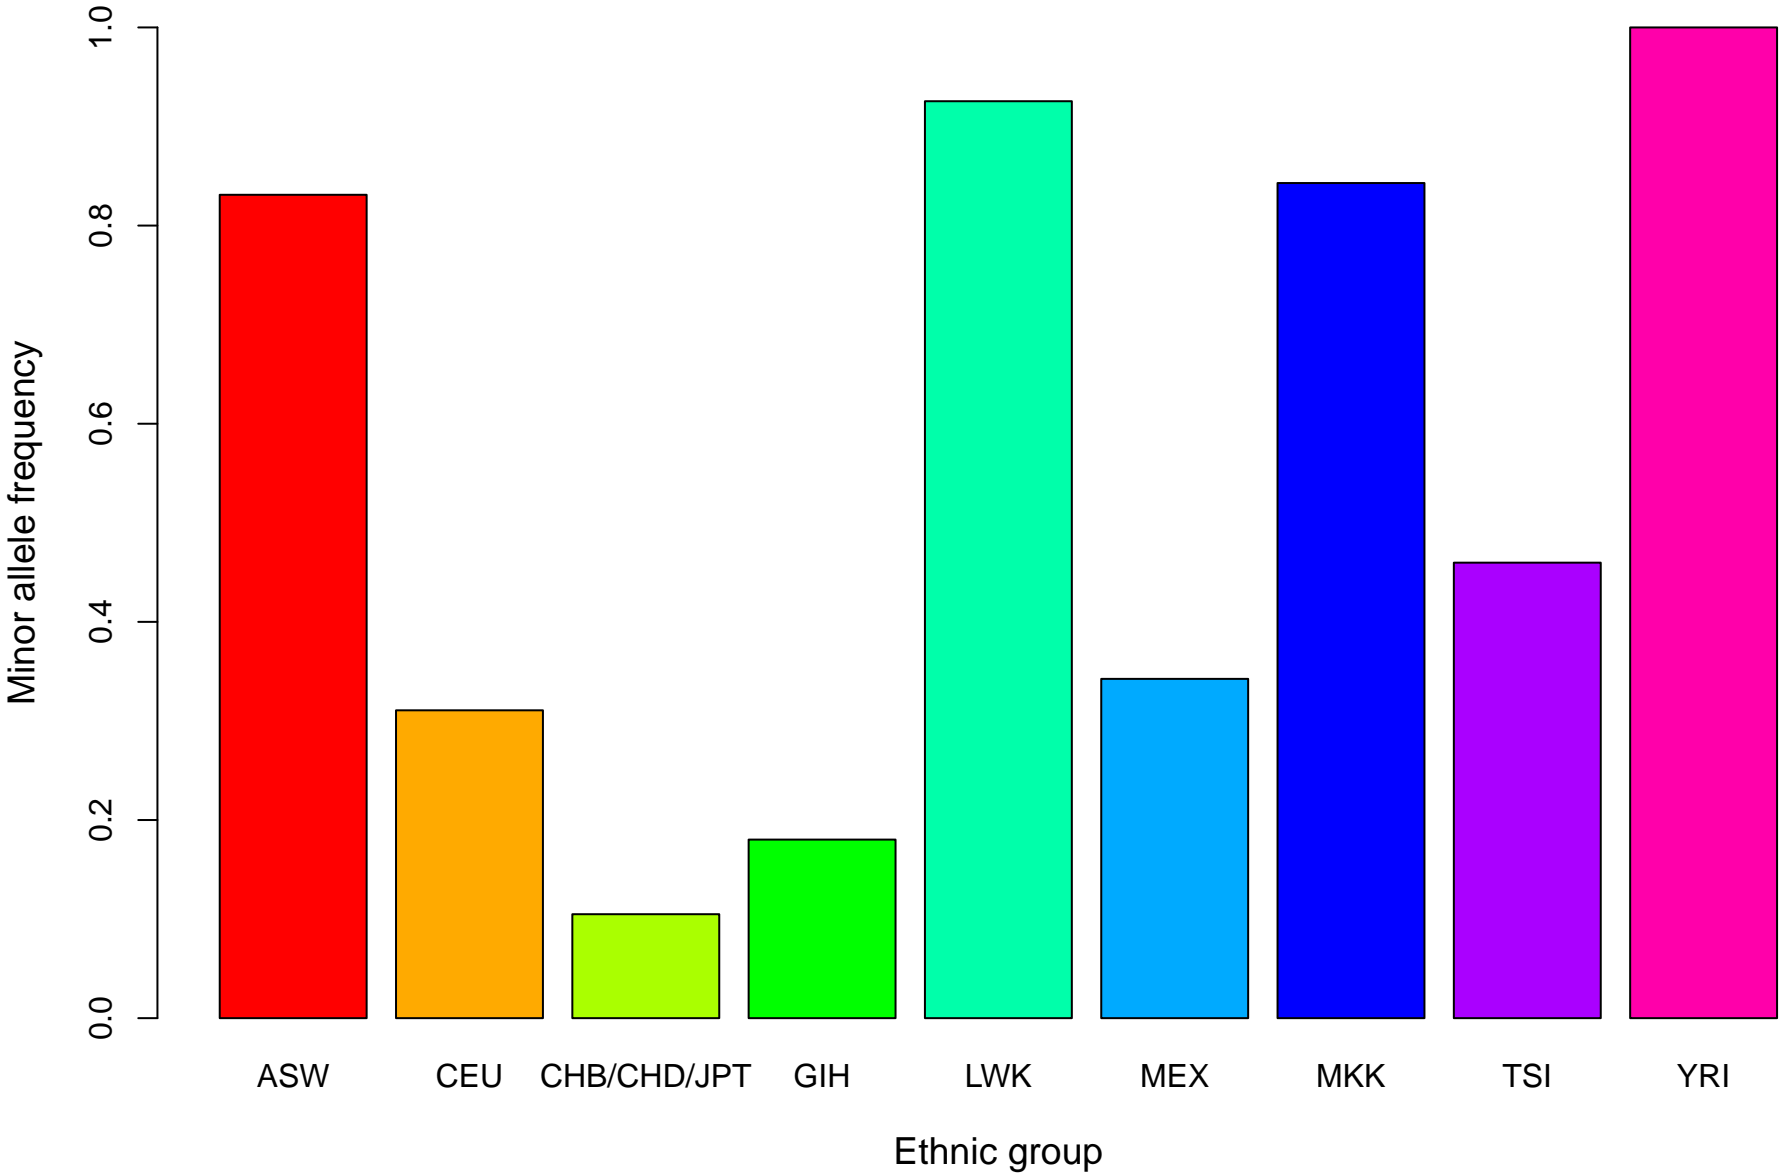

# rs2823621\_A

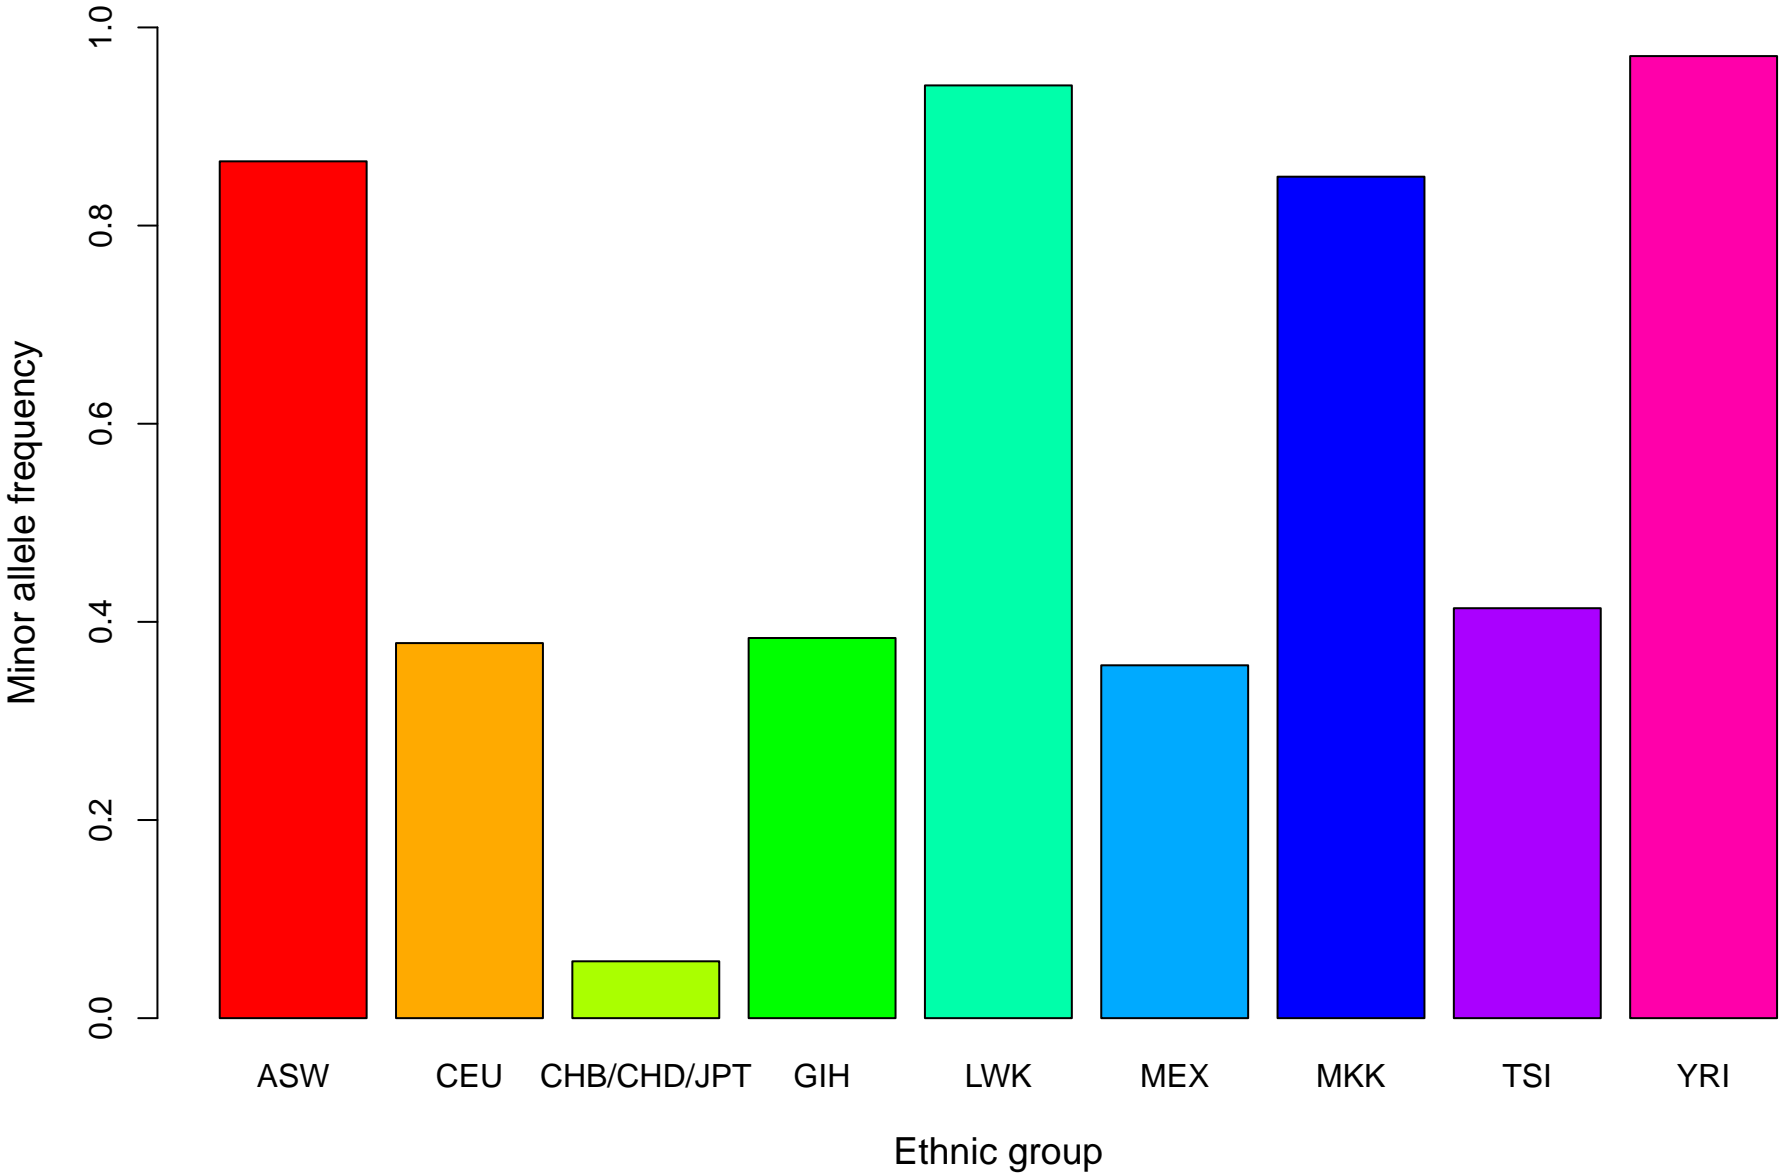



# rs2593595\_G

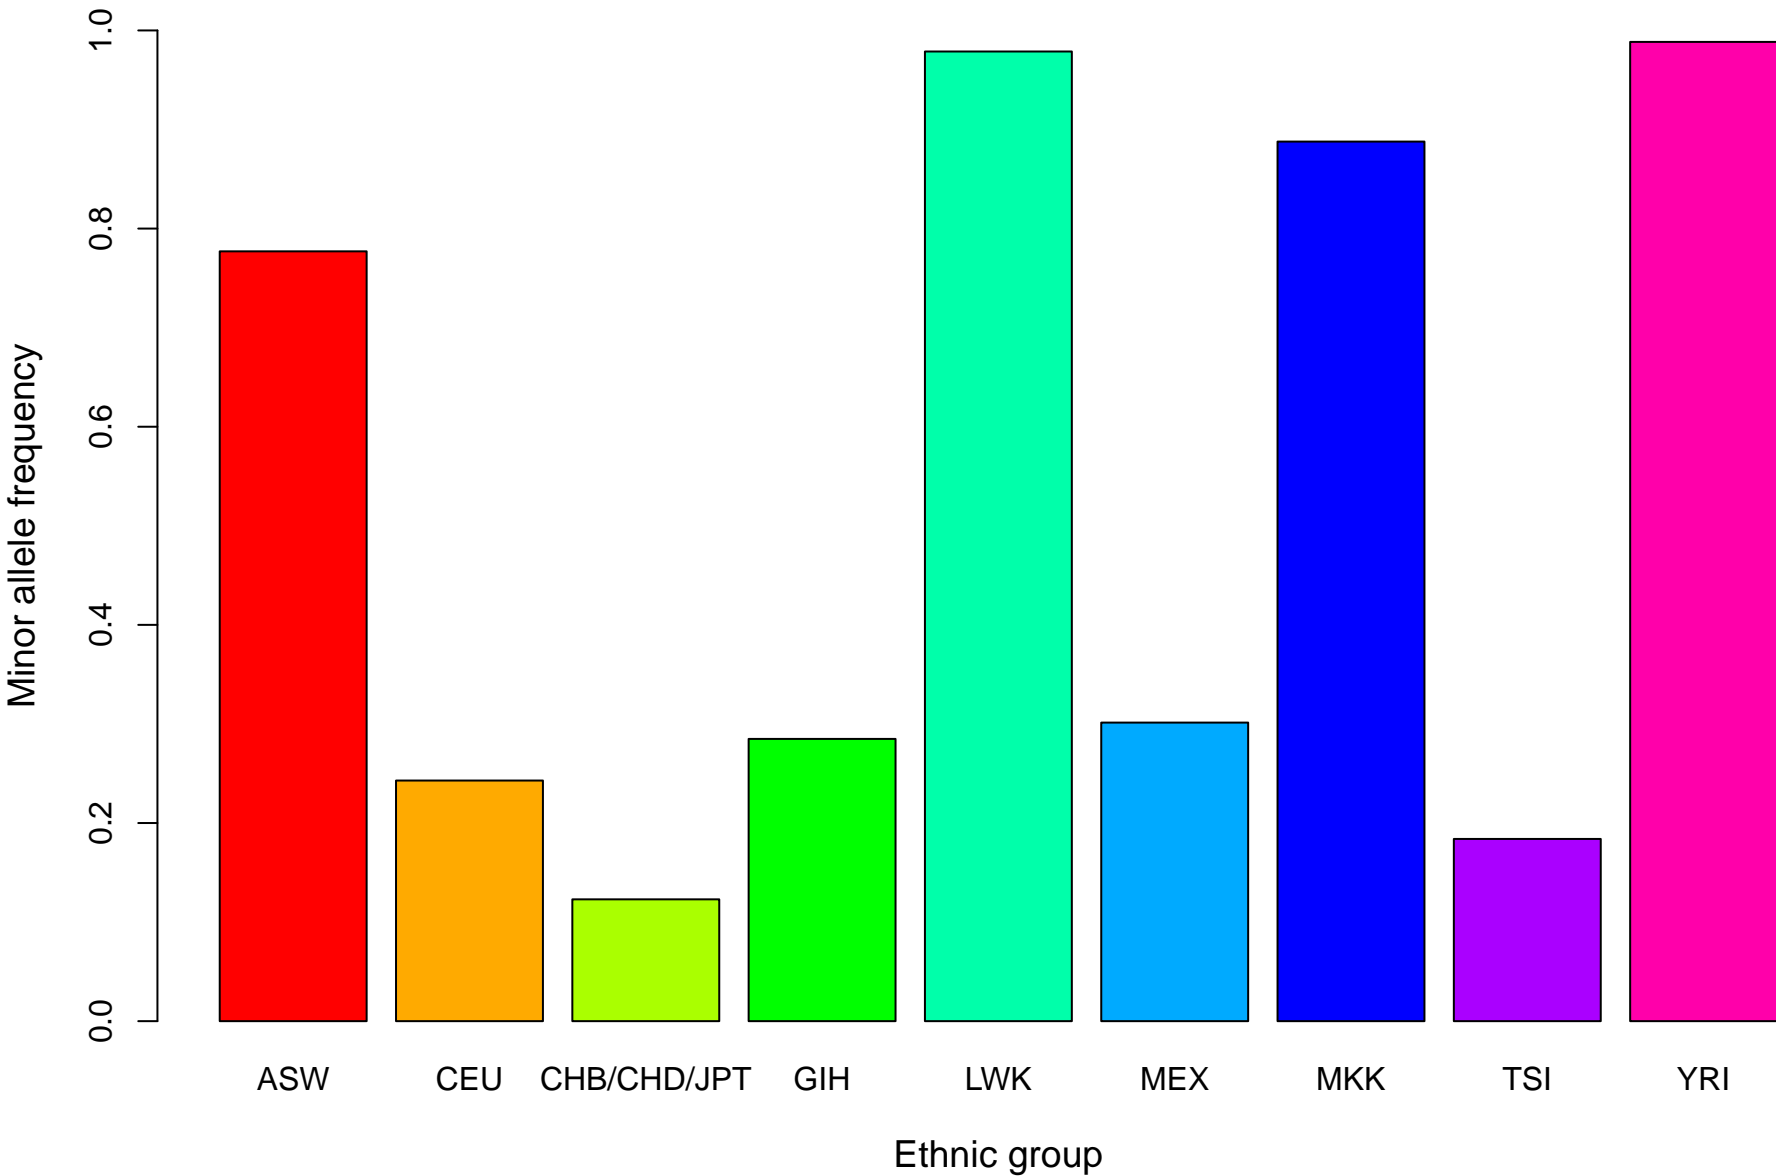

# rs4841527\_G

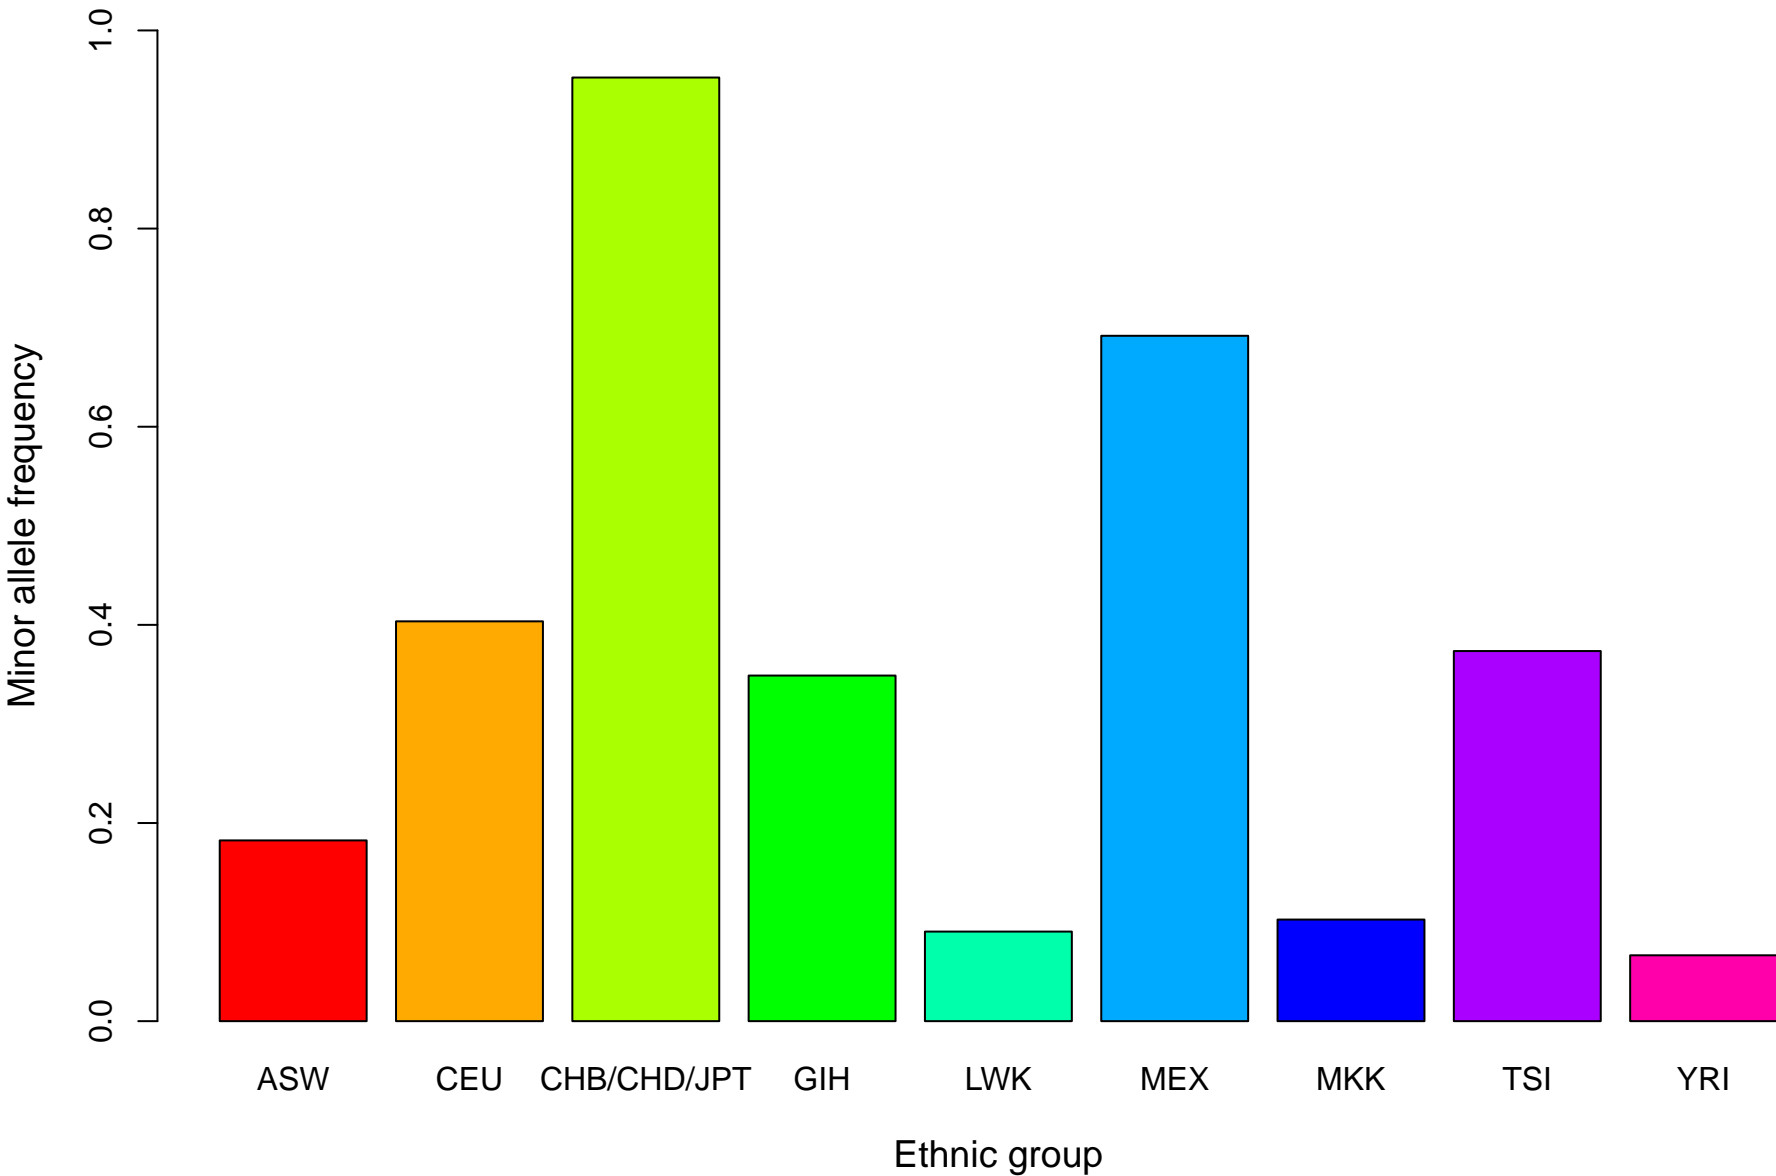

# rs1508060\_C

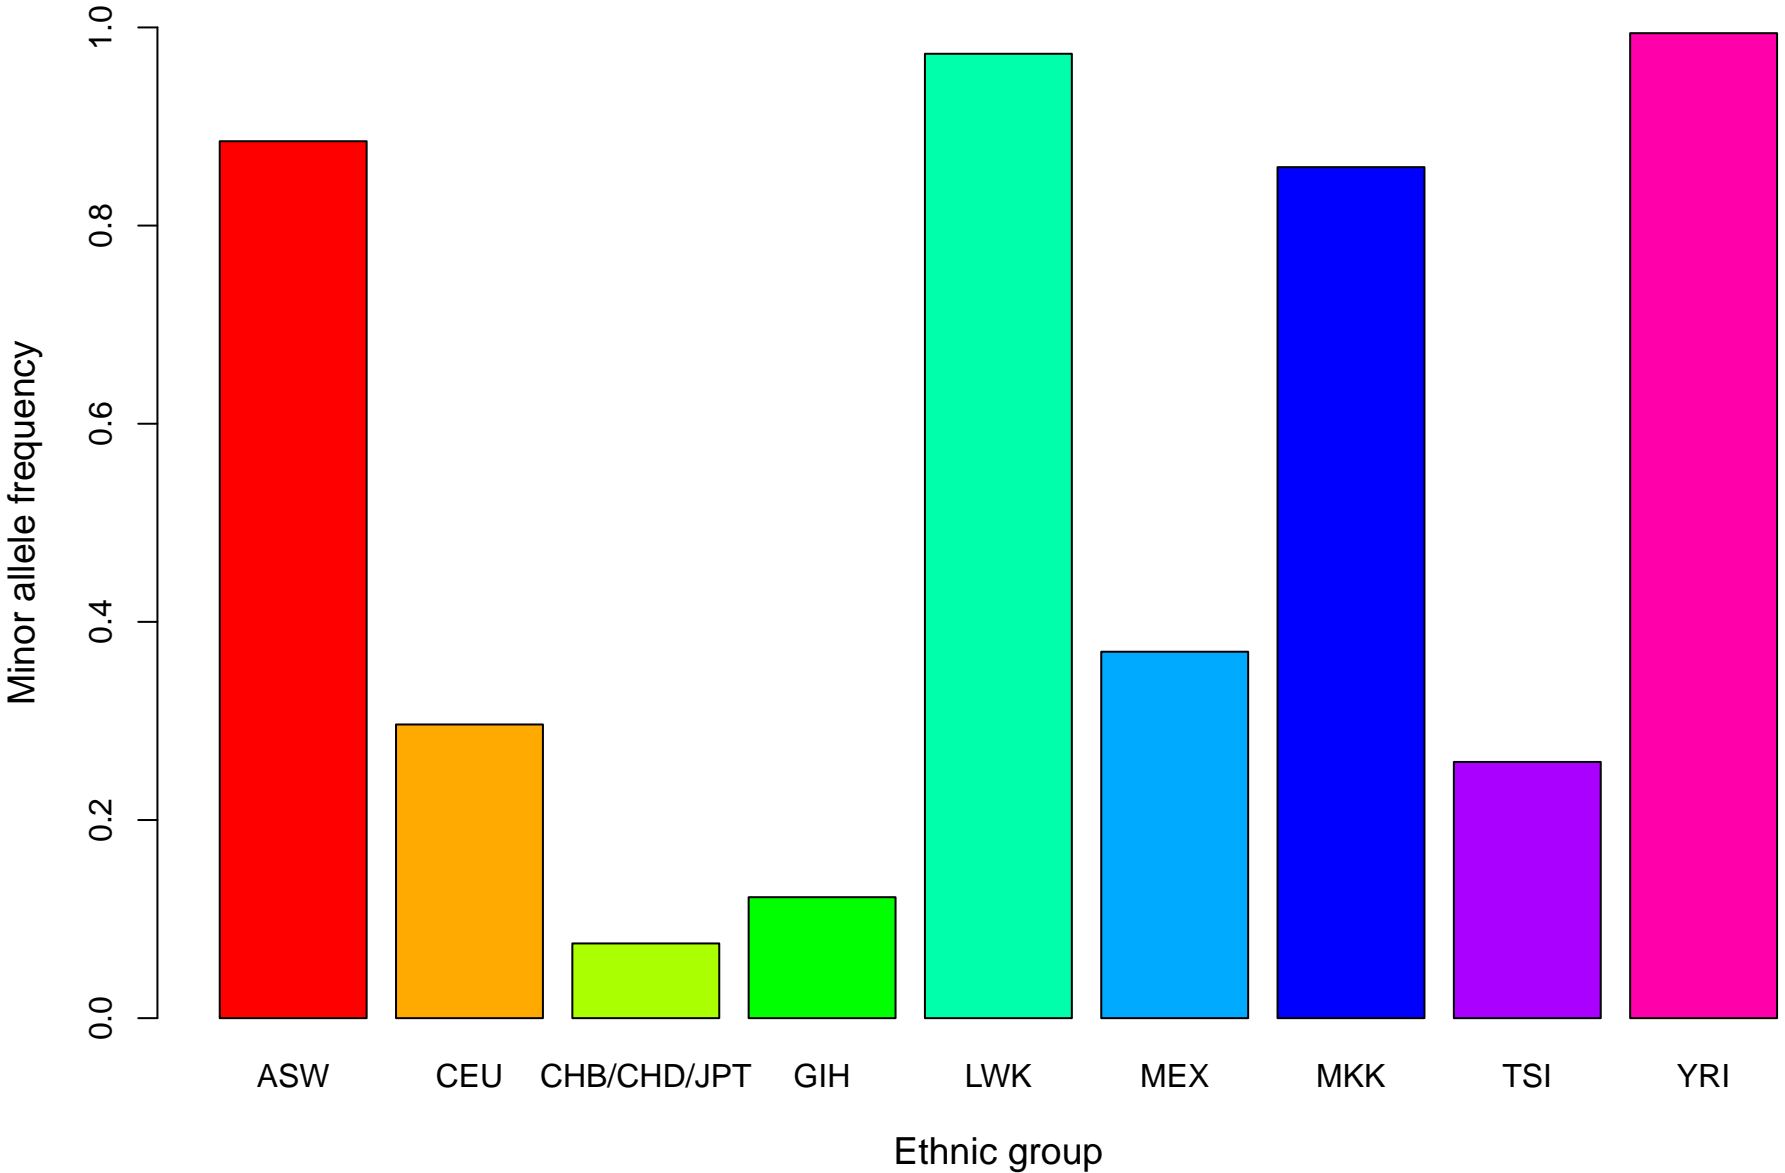

# rs5995756\_C

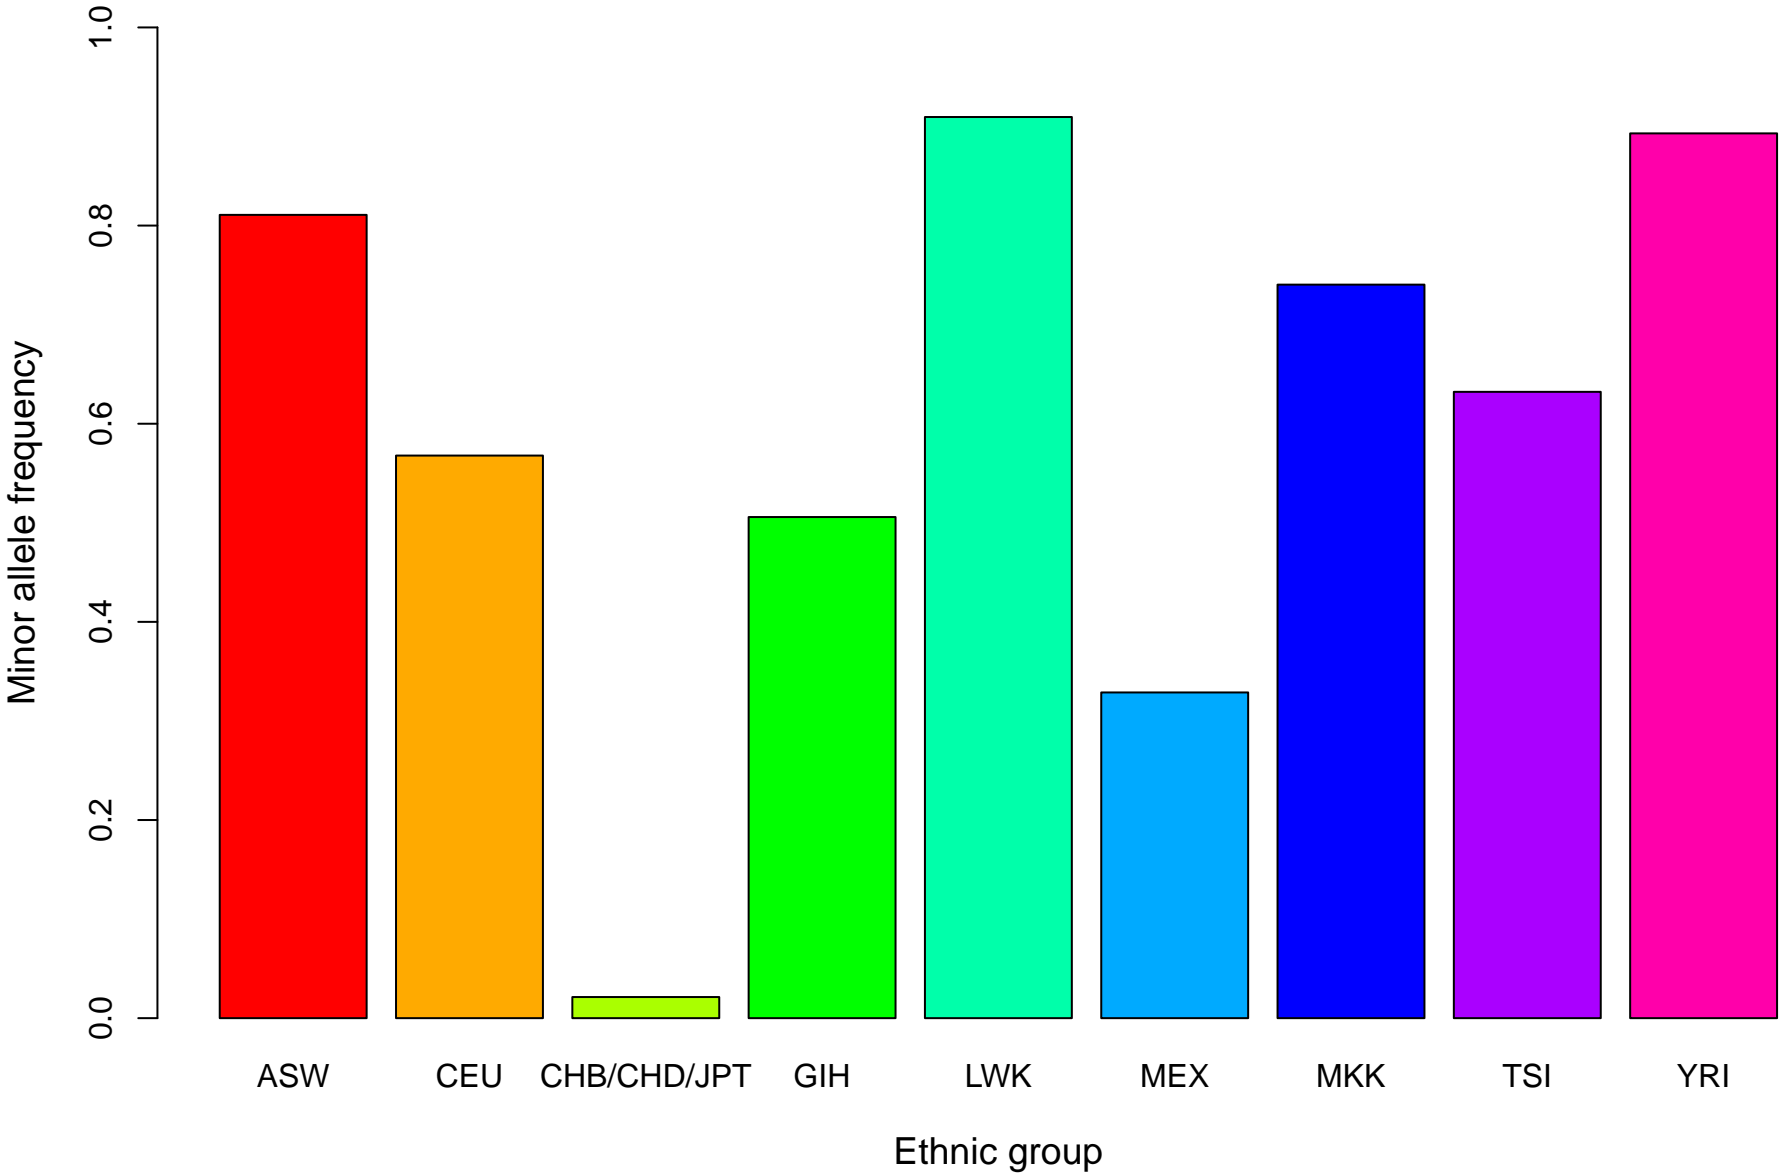

# rs6446975\_A

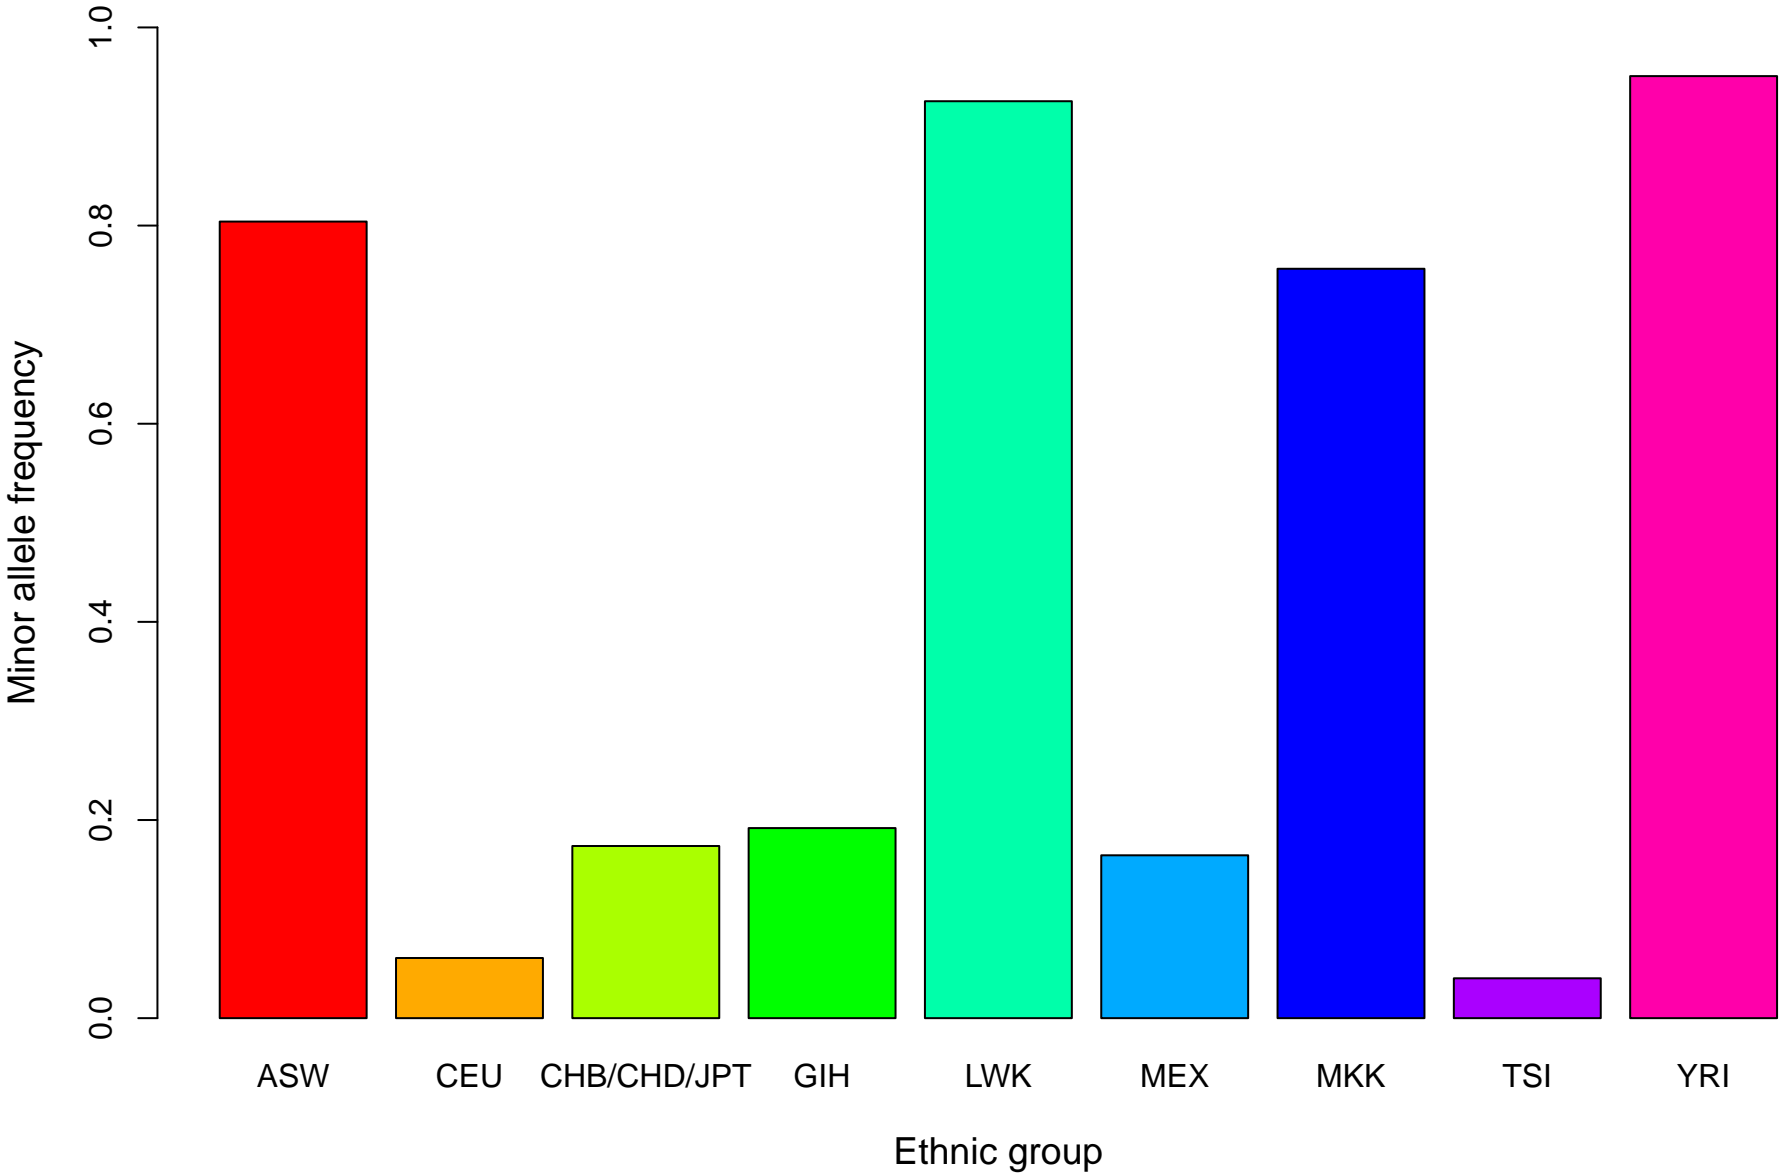

# rs1022573\_A

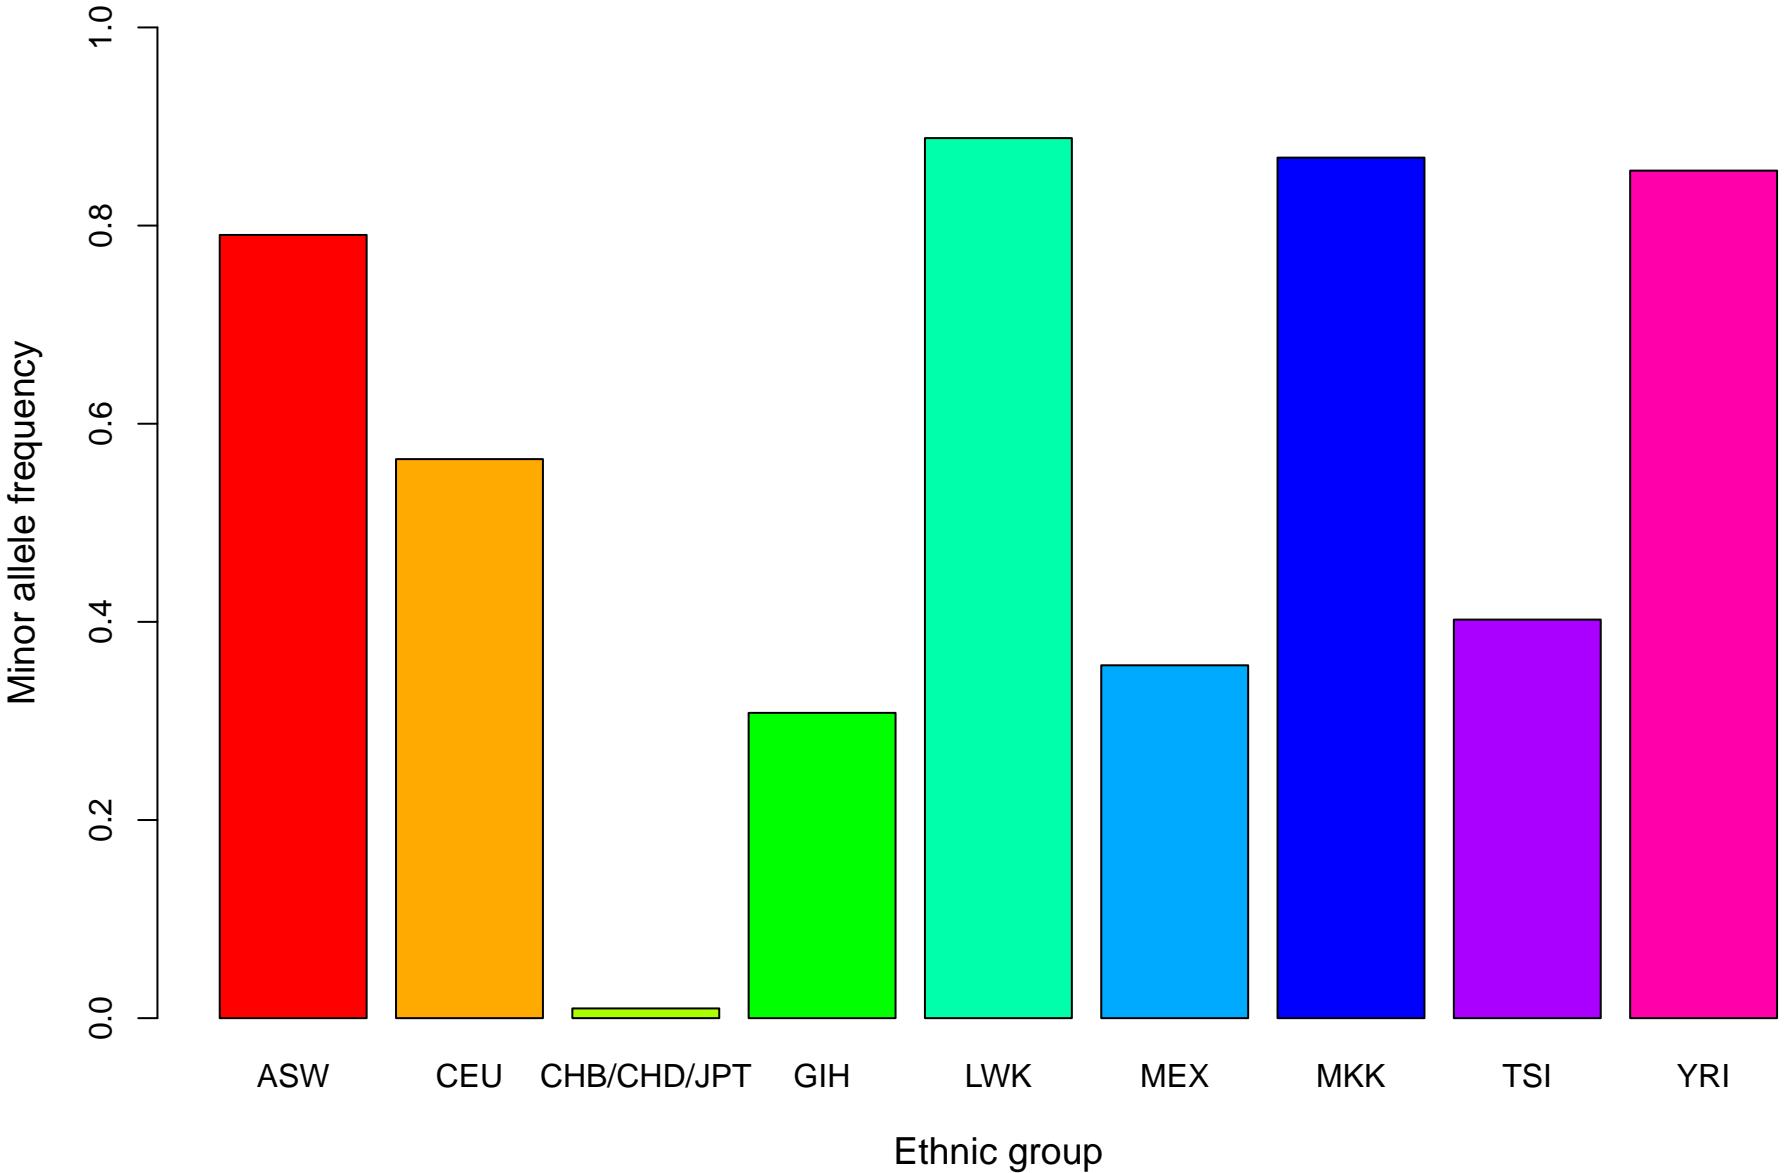

# rs1679012\_C

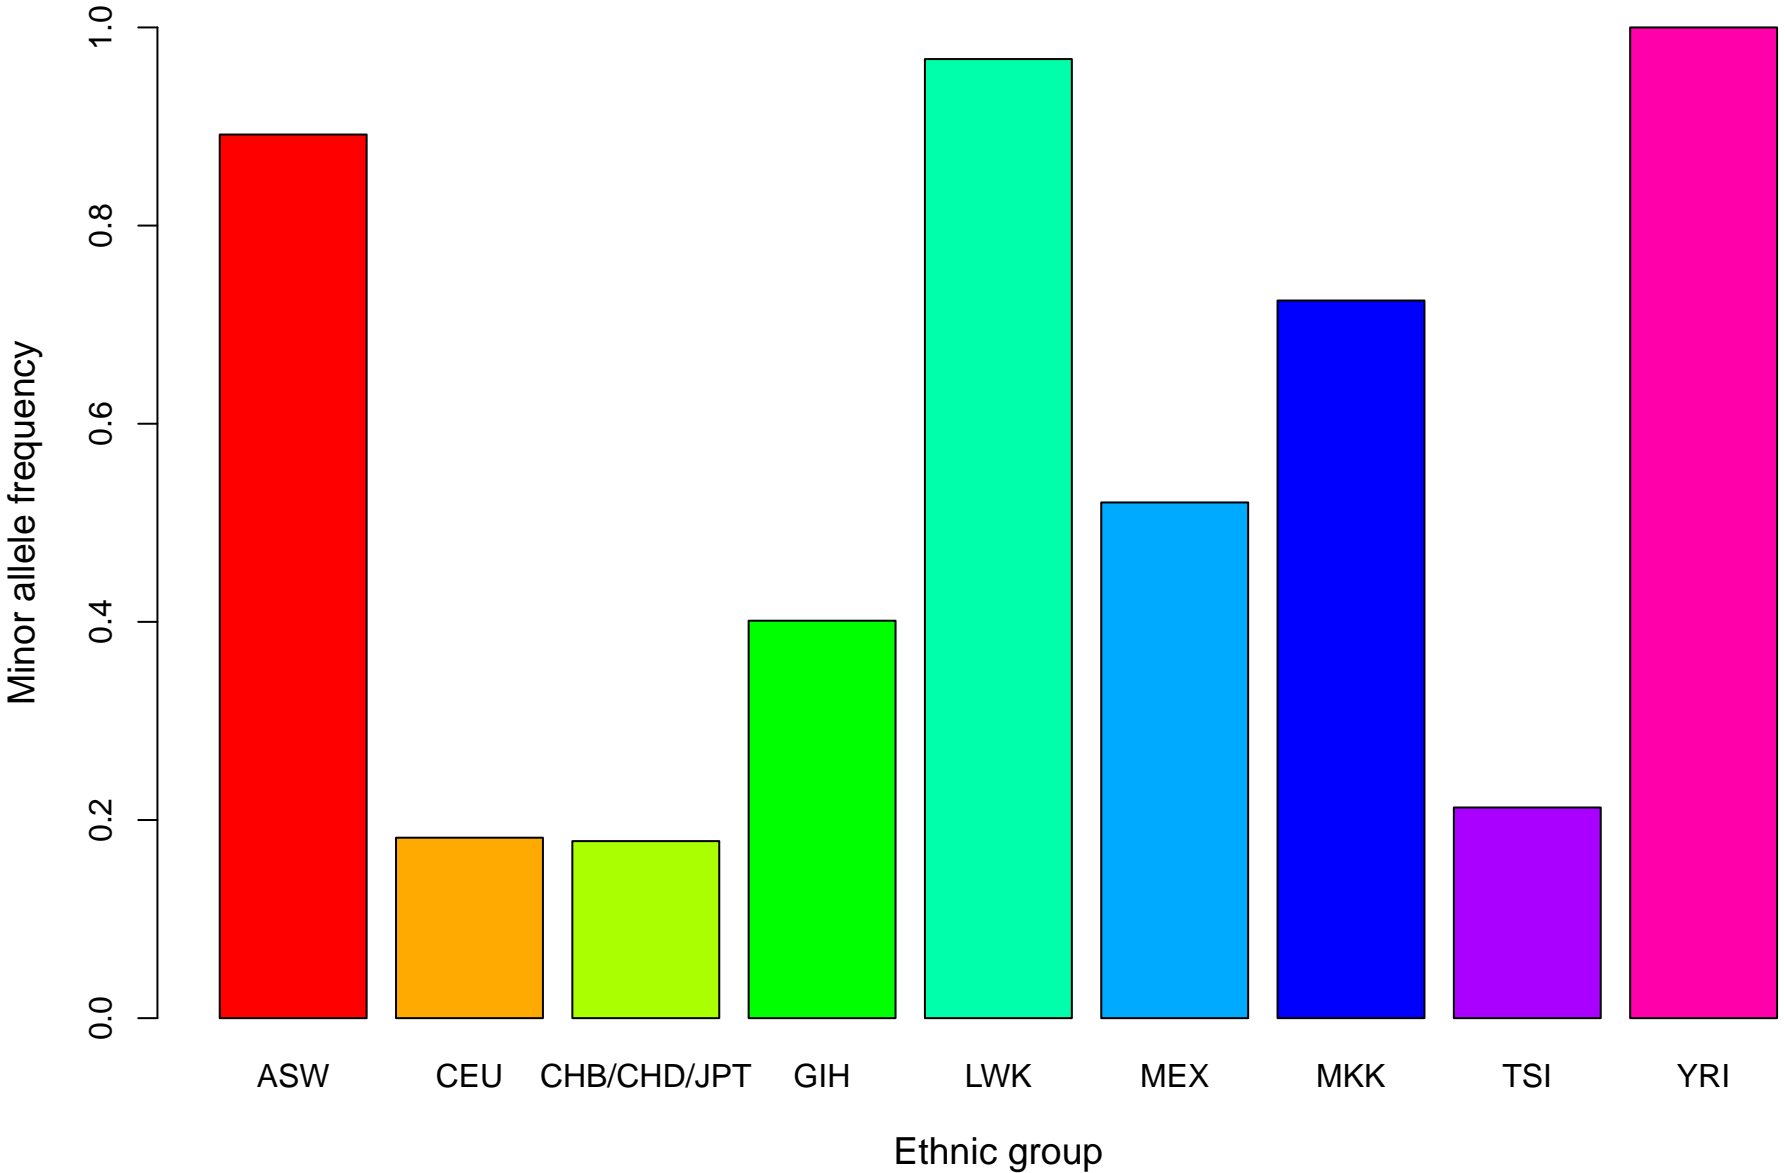

# rs3804191\_C

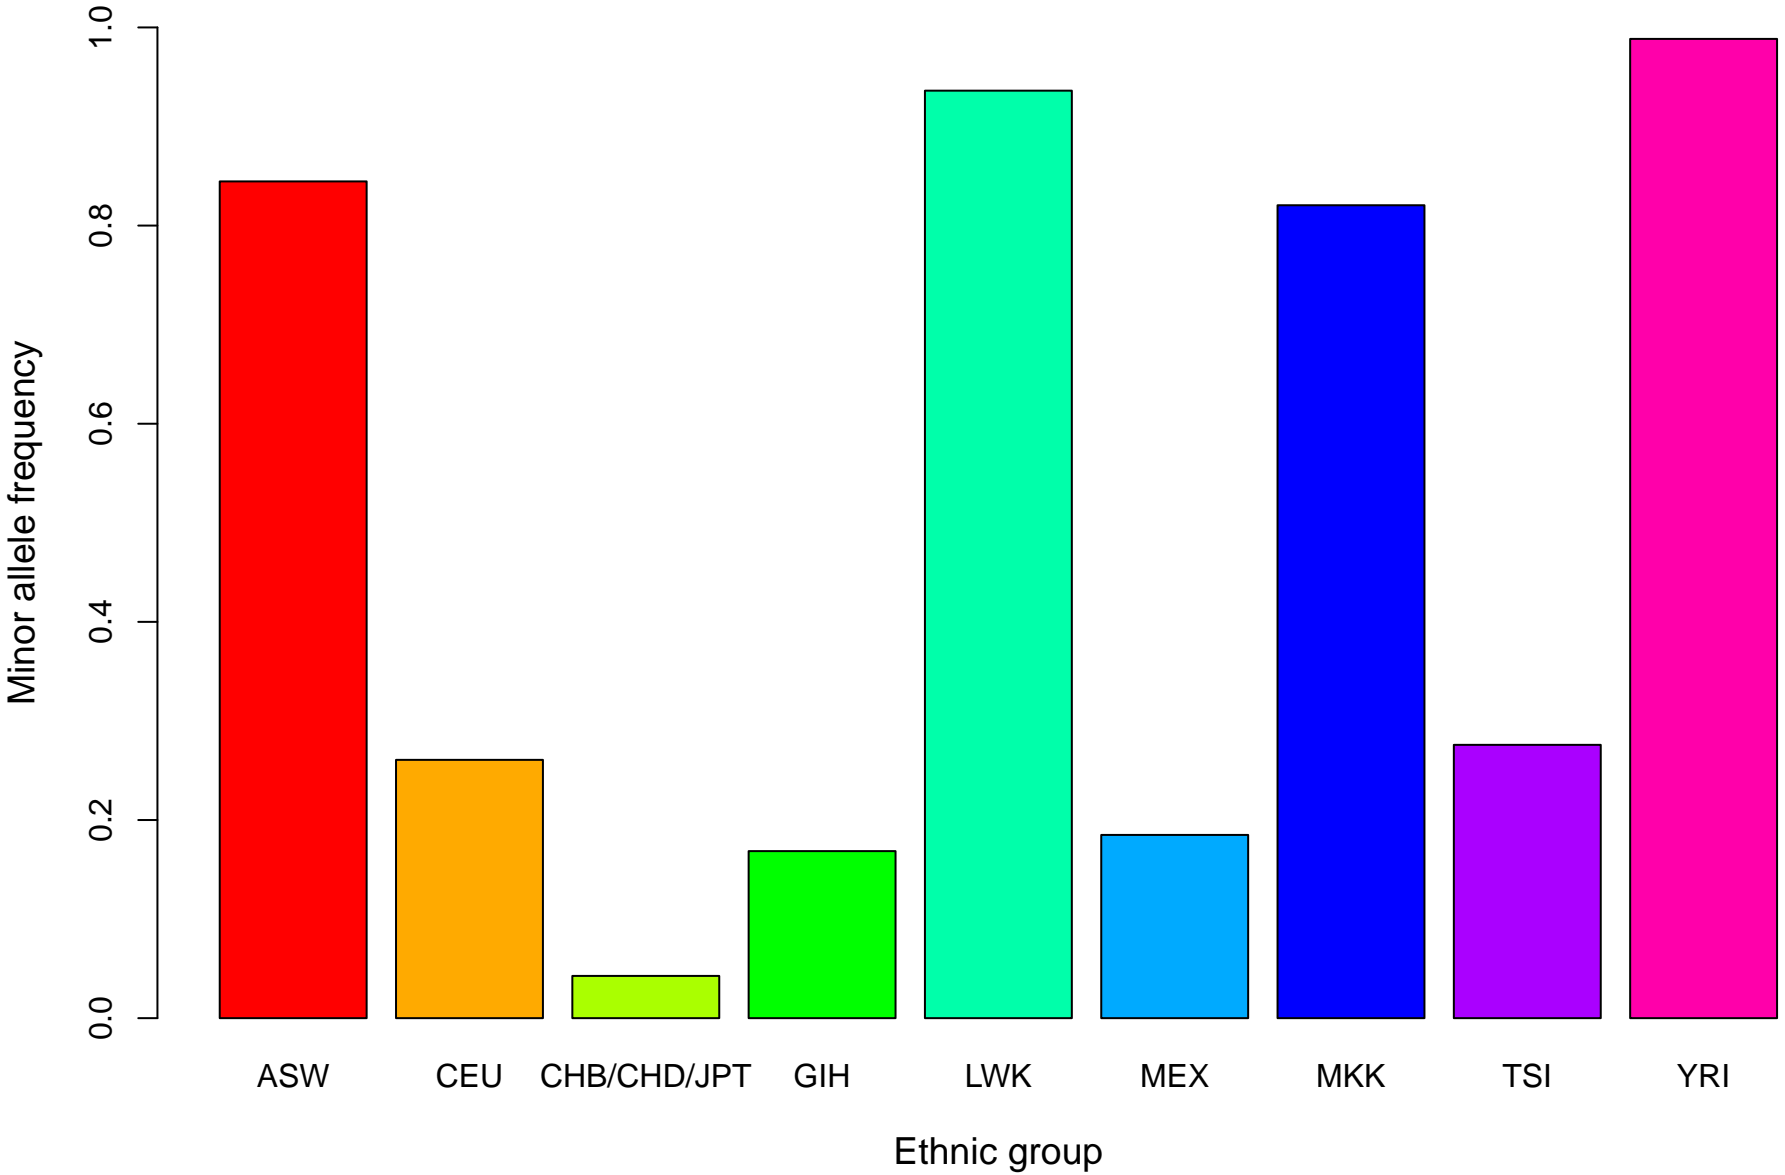



# rs765831\_G

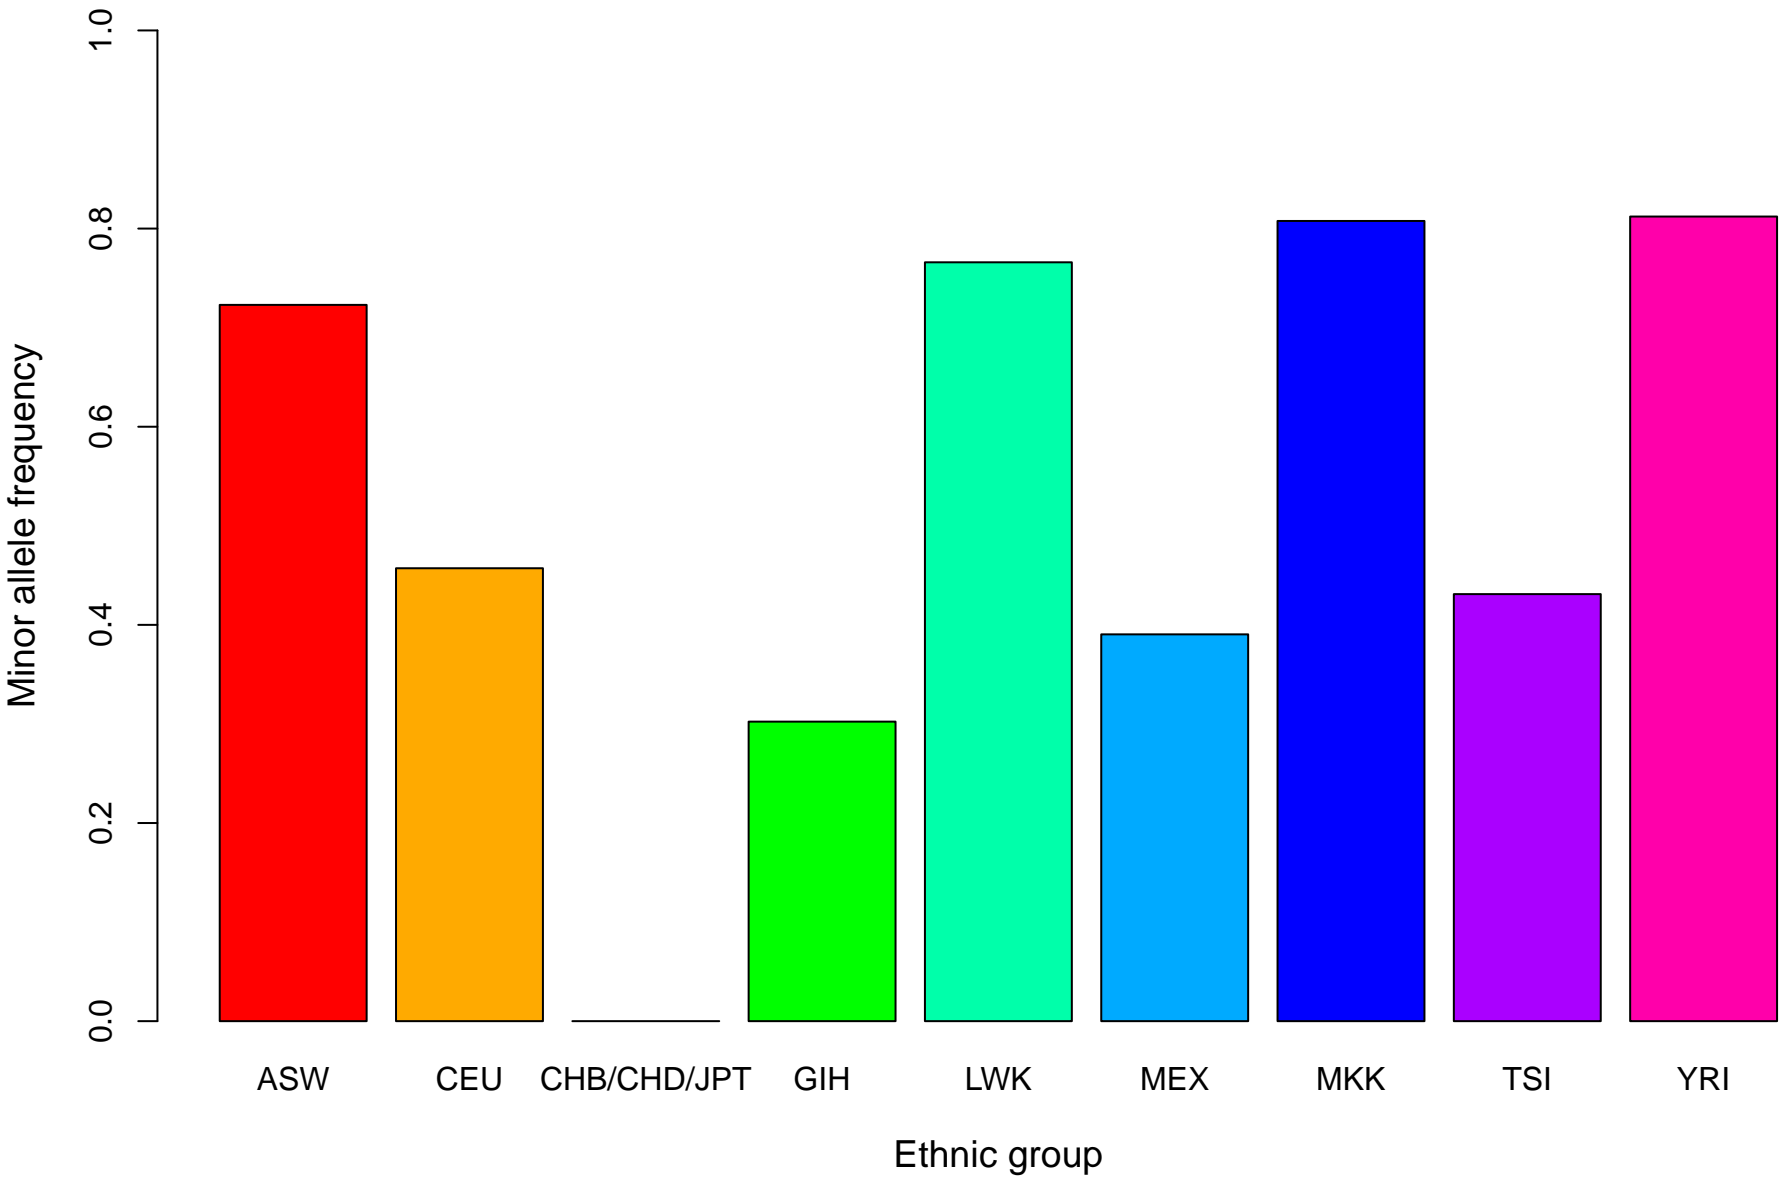

# rs6688004\_G

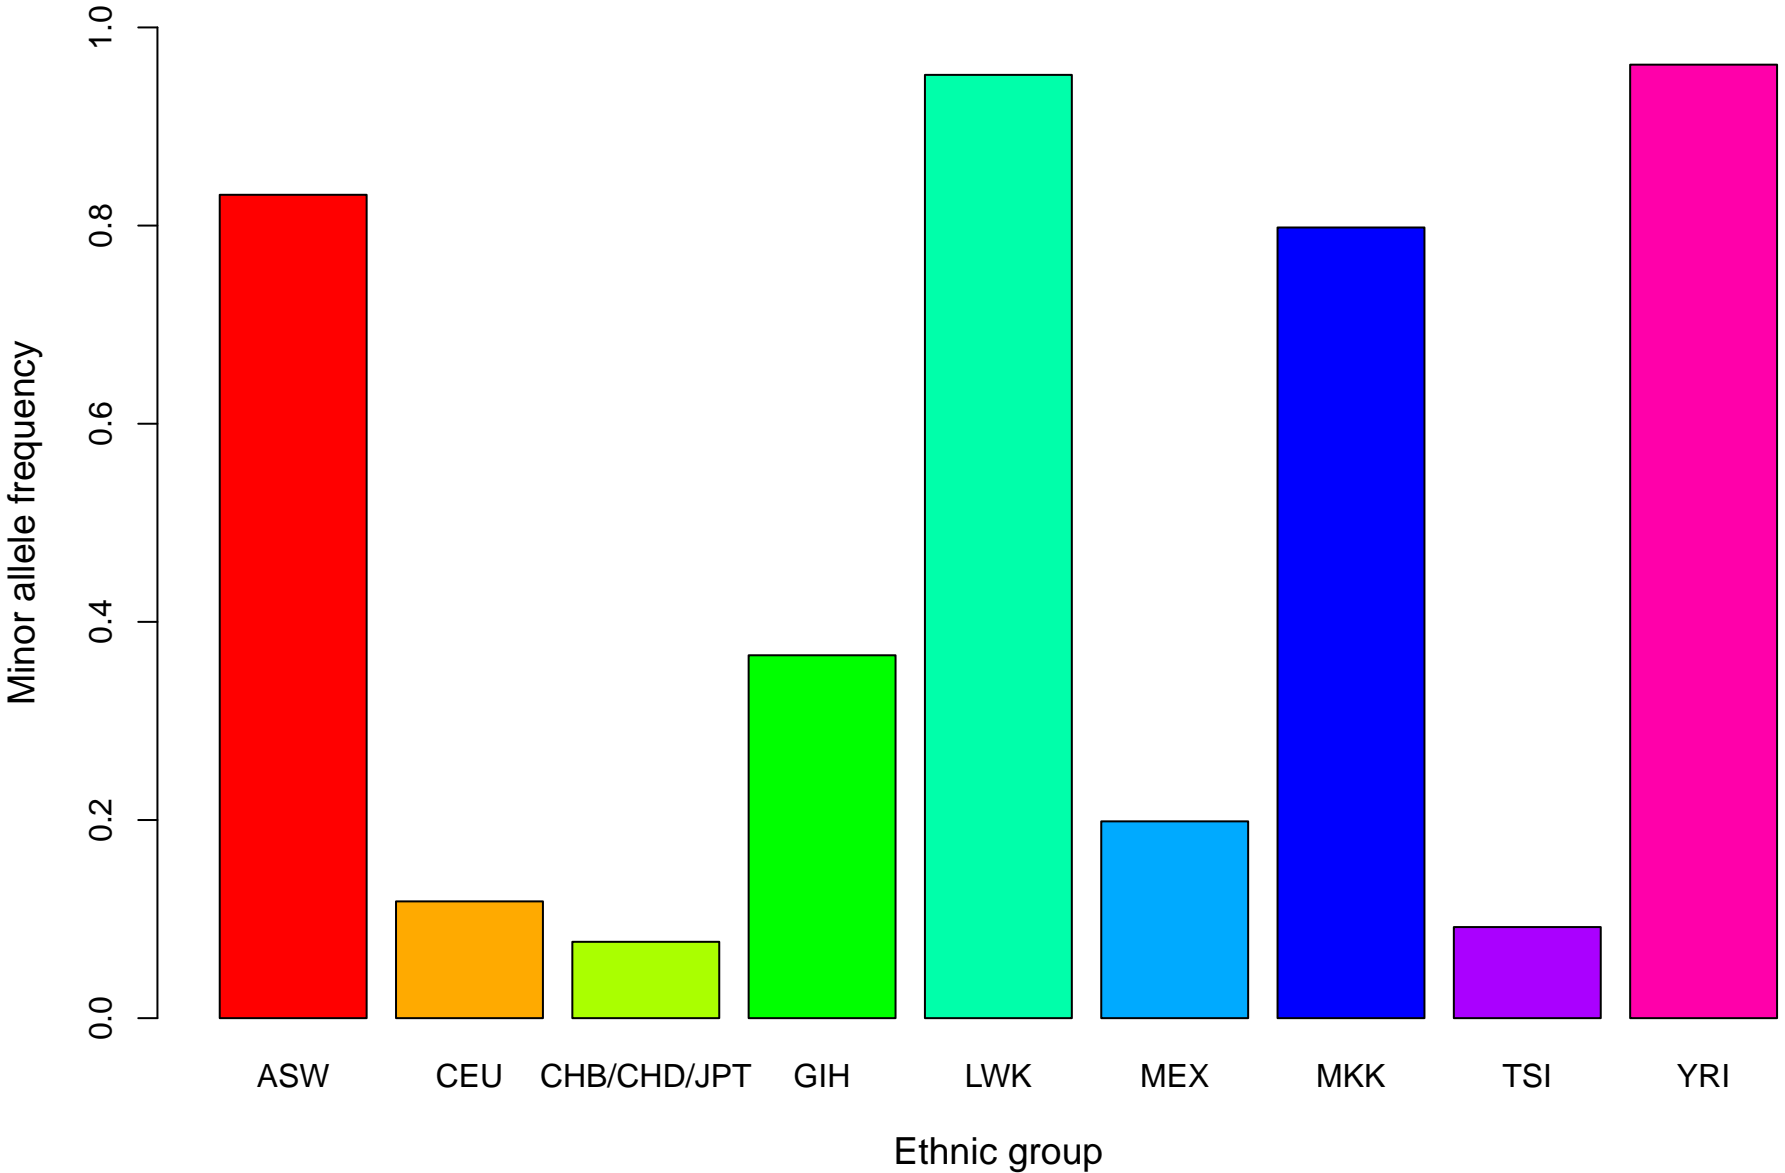

# rs11822822\_G

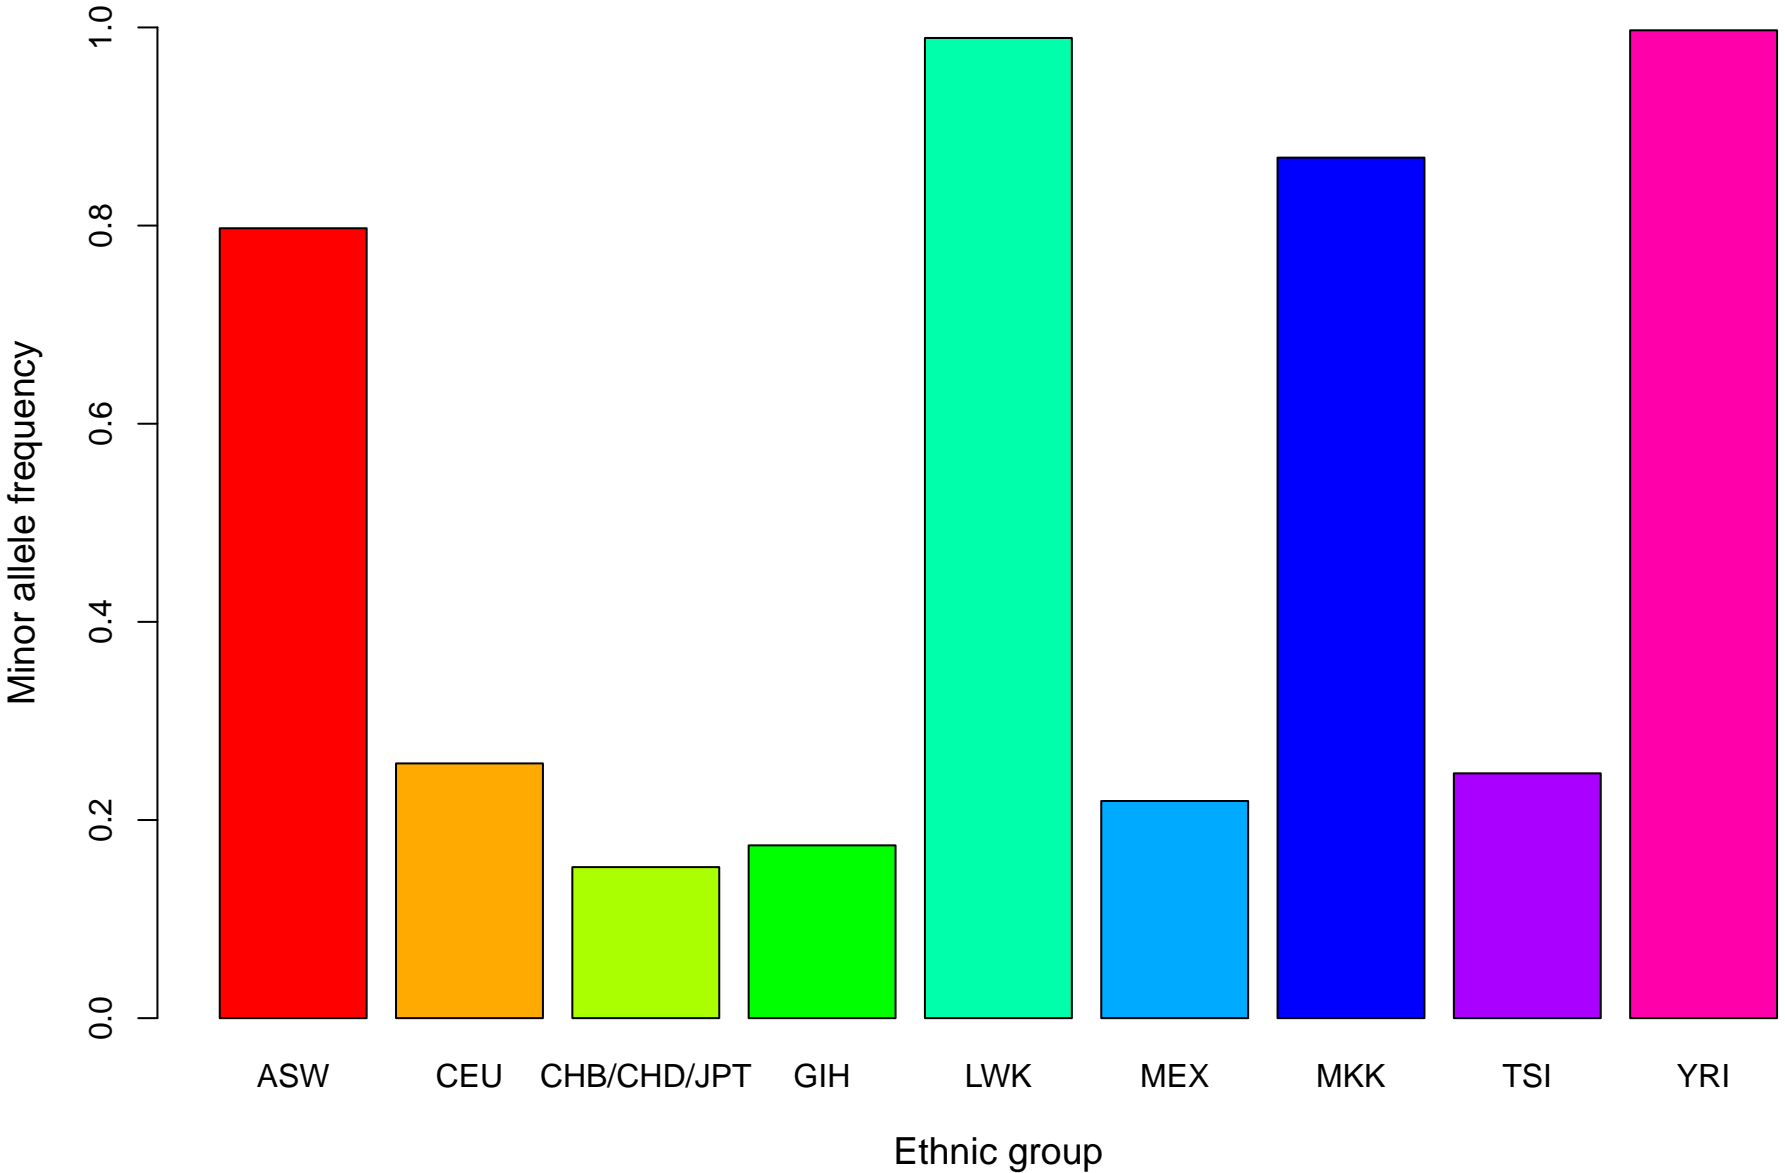

# rs10785952\_G

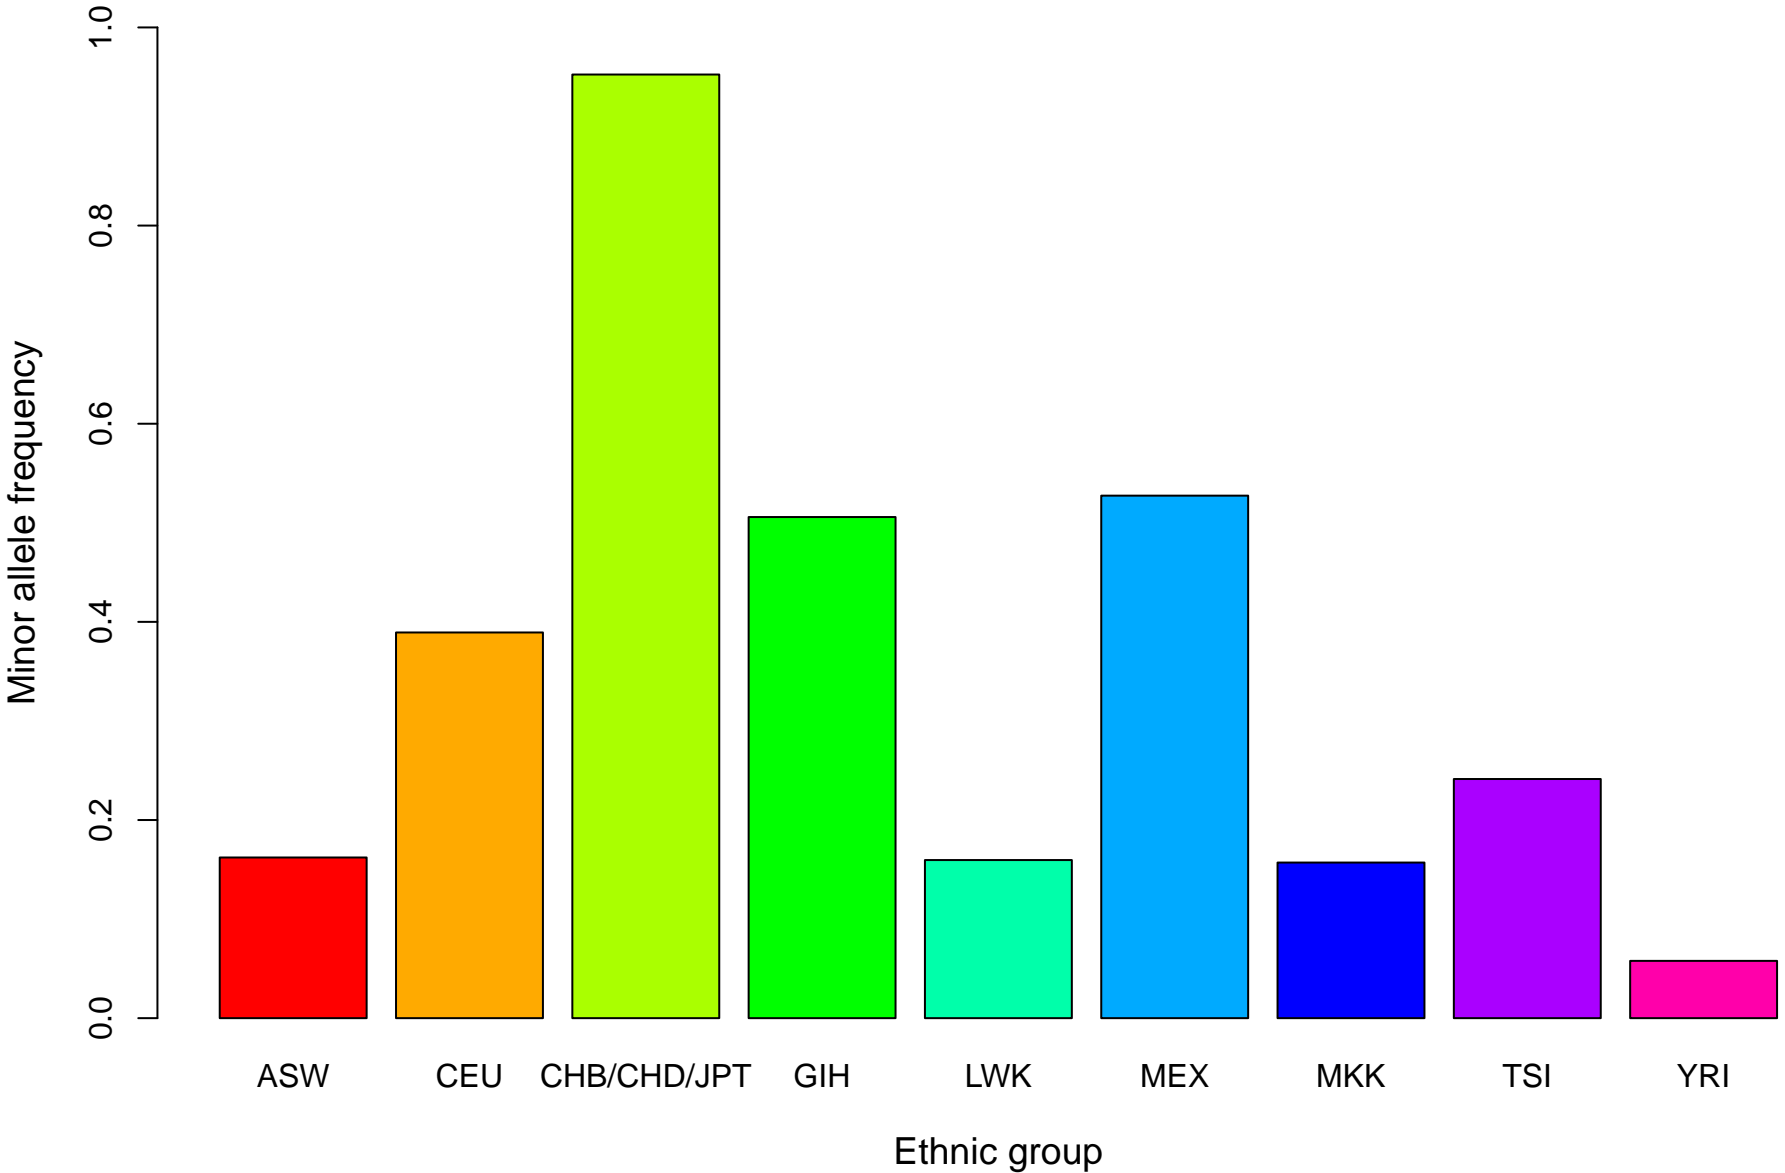

# rs10780921\_G

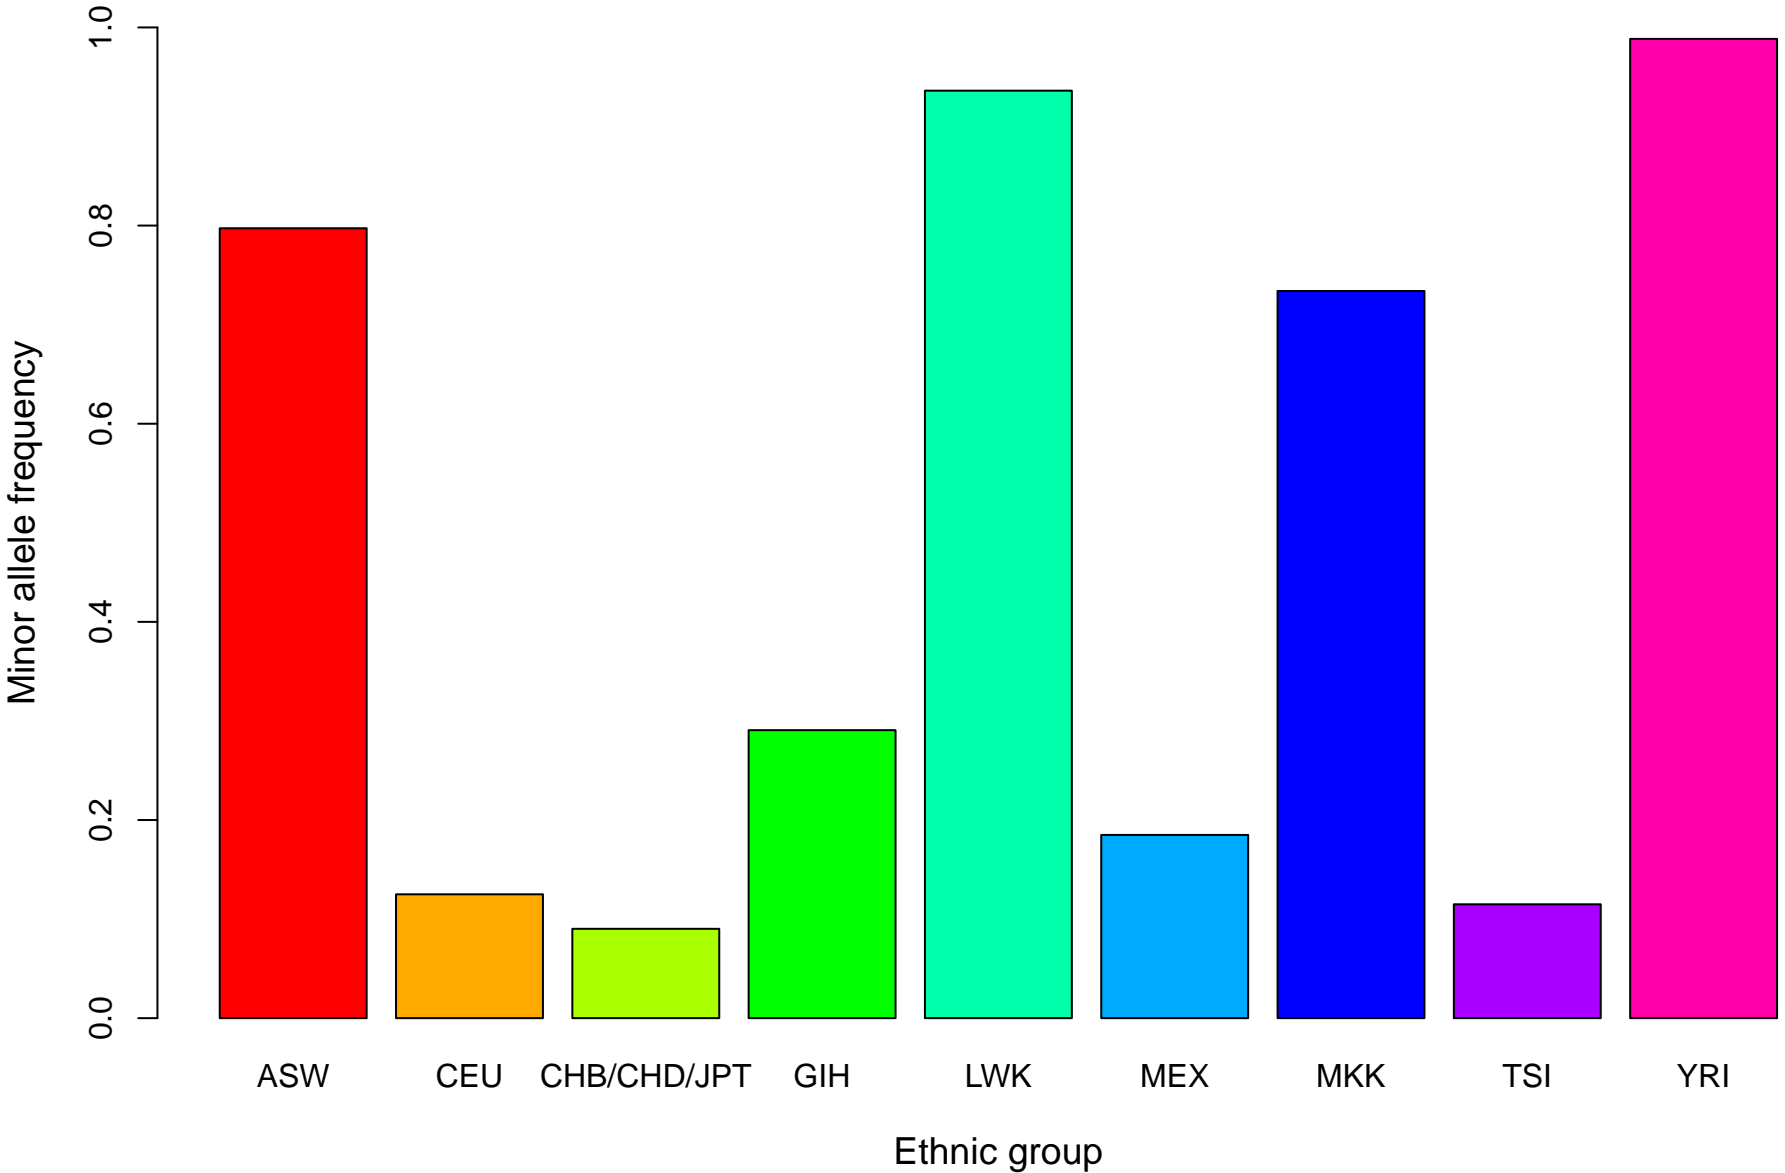

# rs7083149\_C

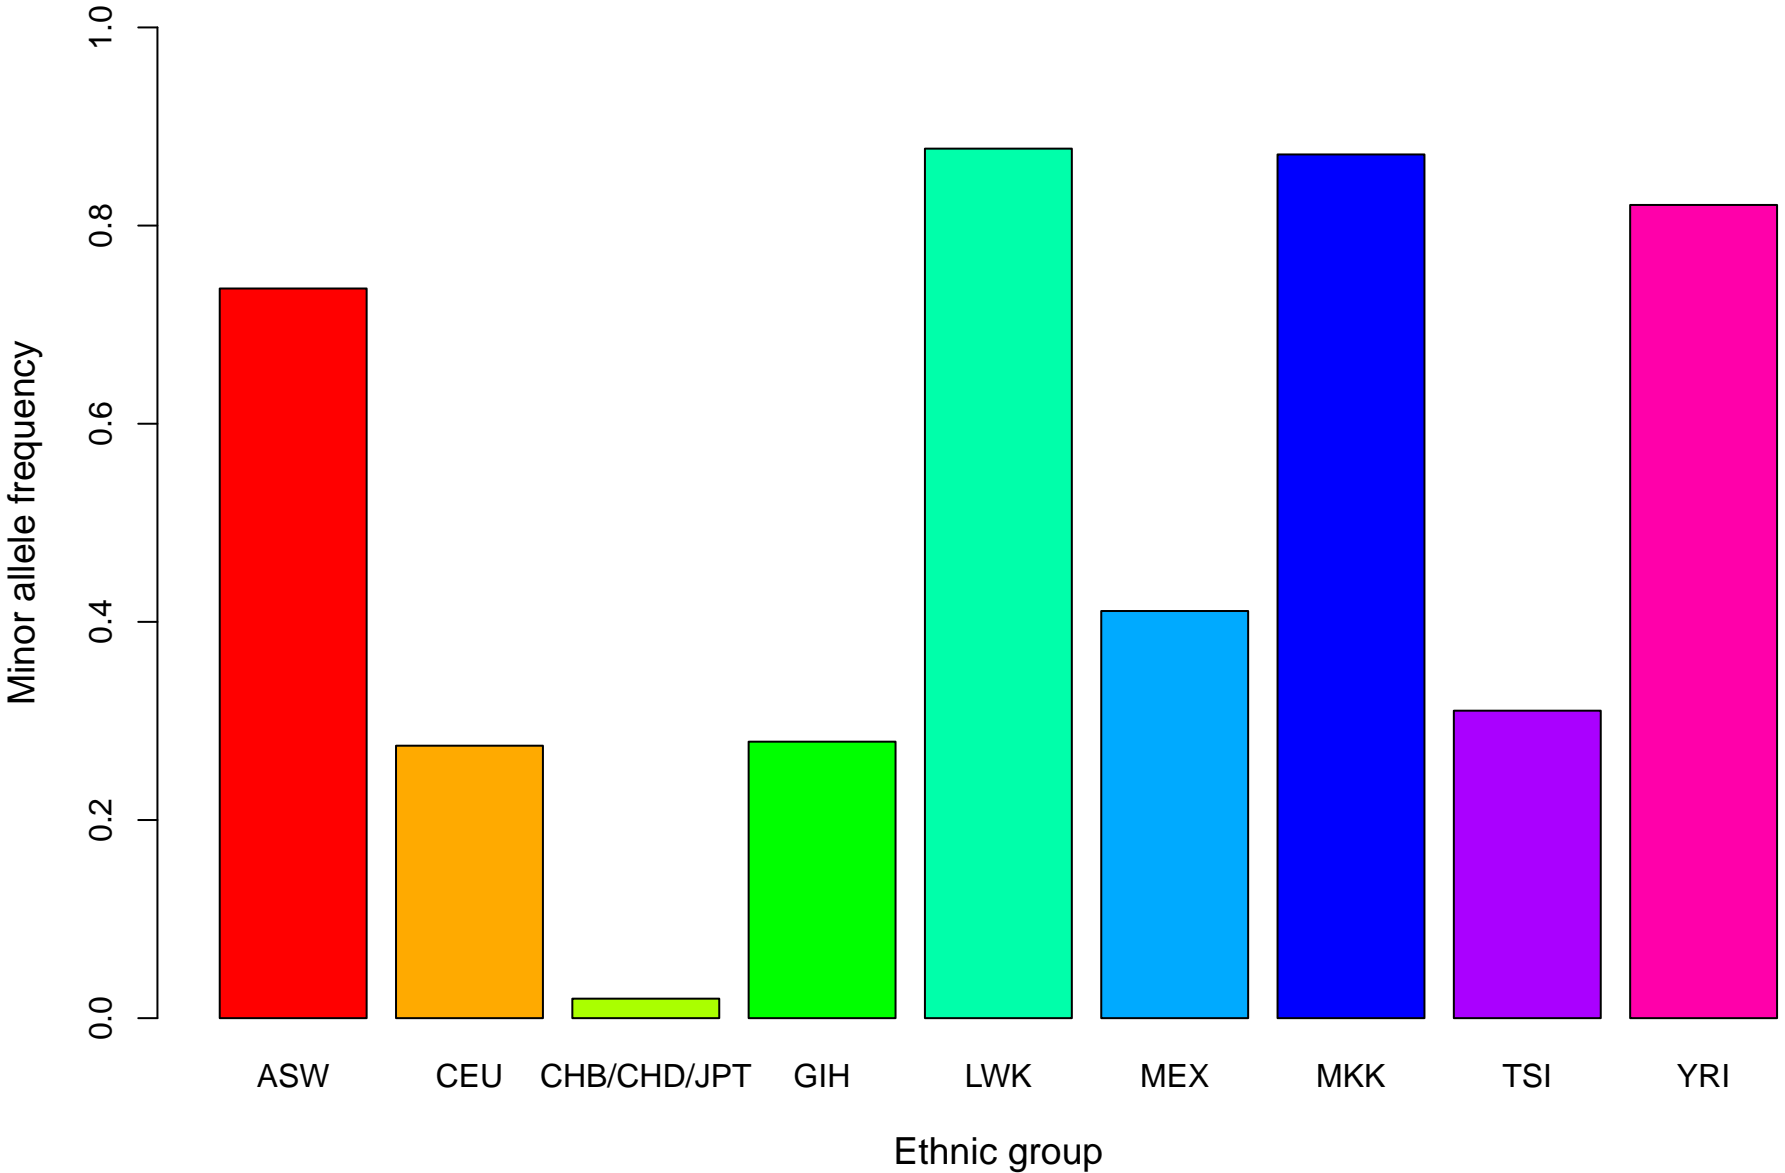

# rs6647631\_A

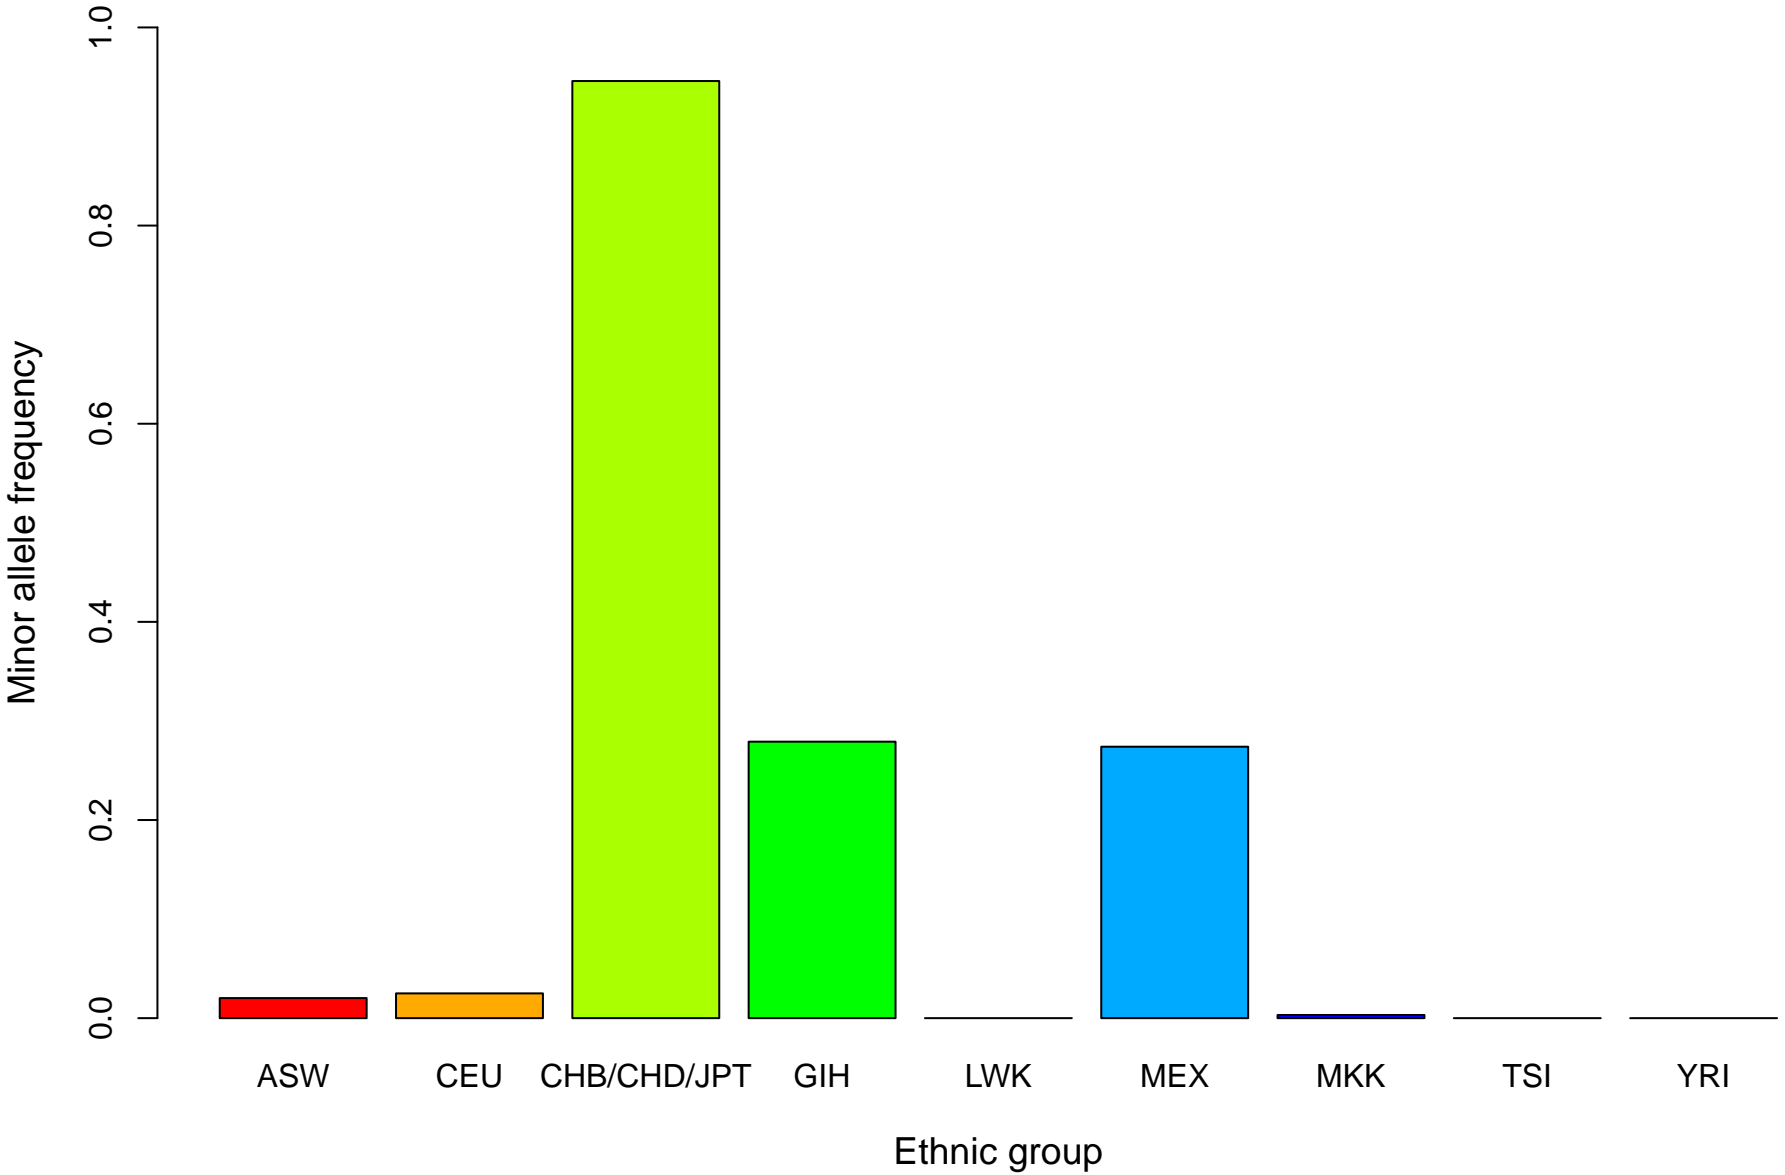

# rs522982\_C

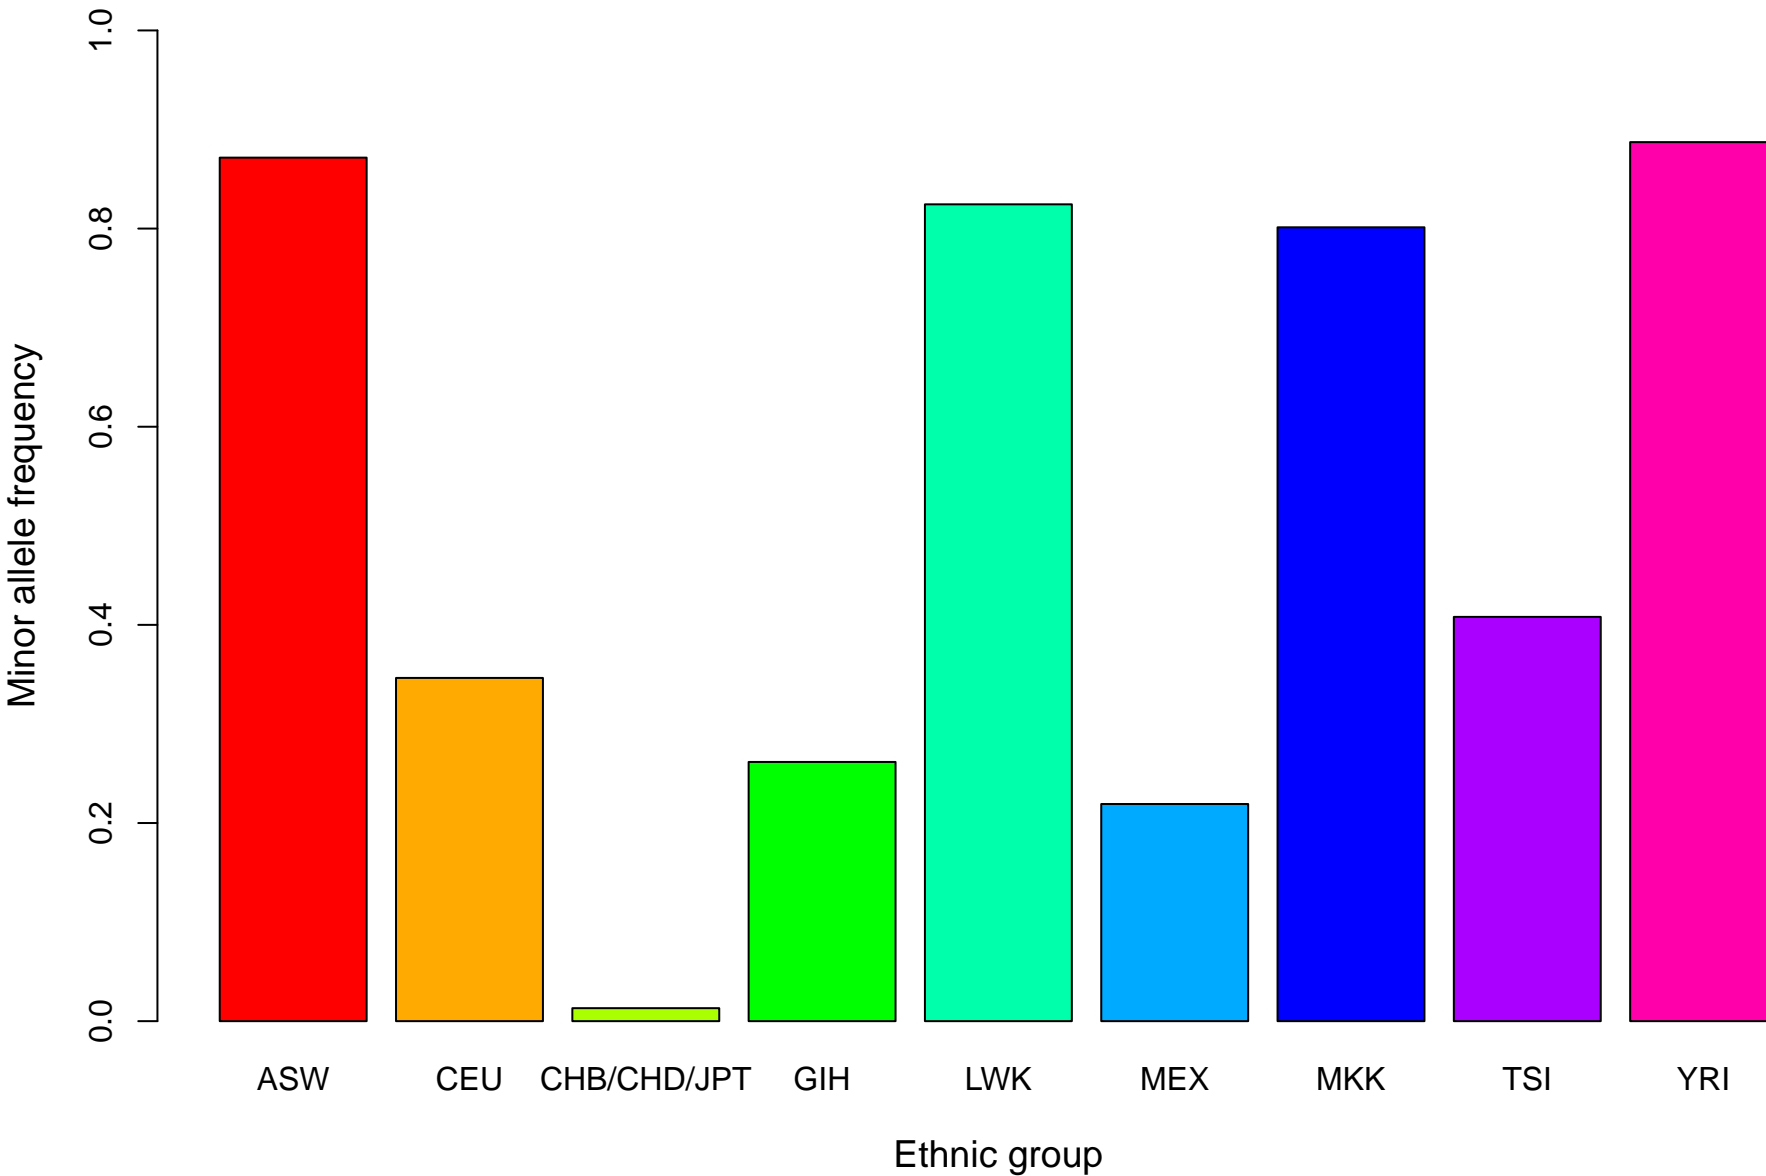



# rs1593304\_A

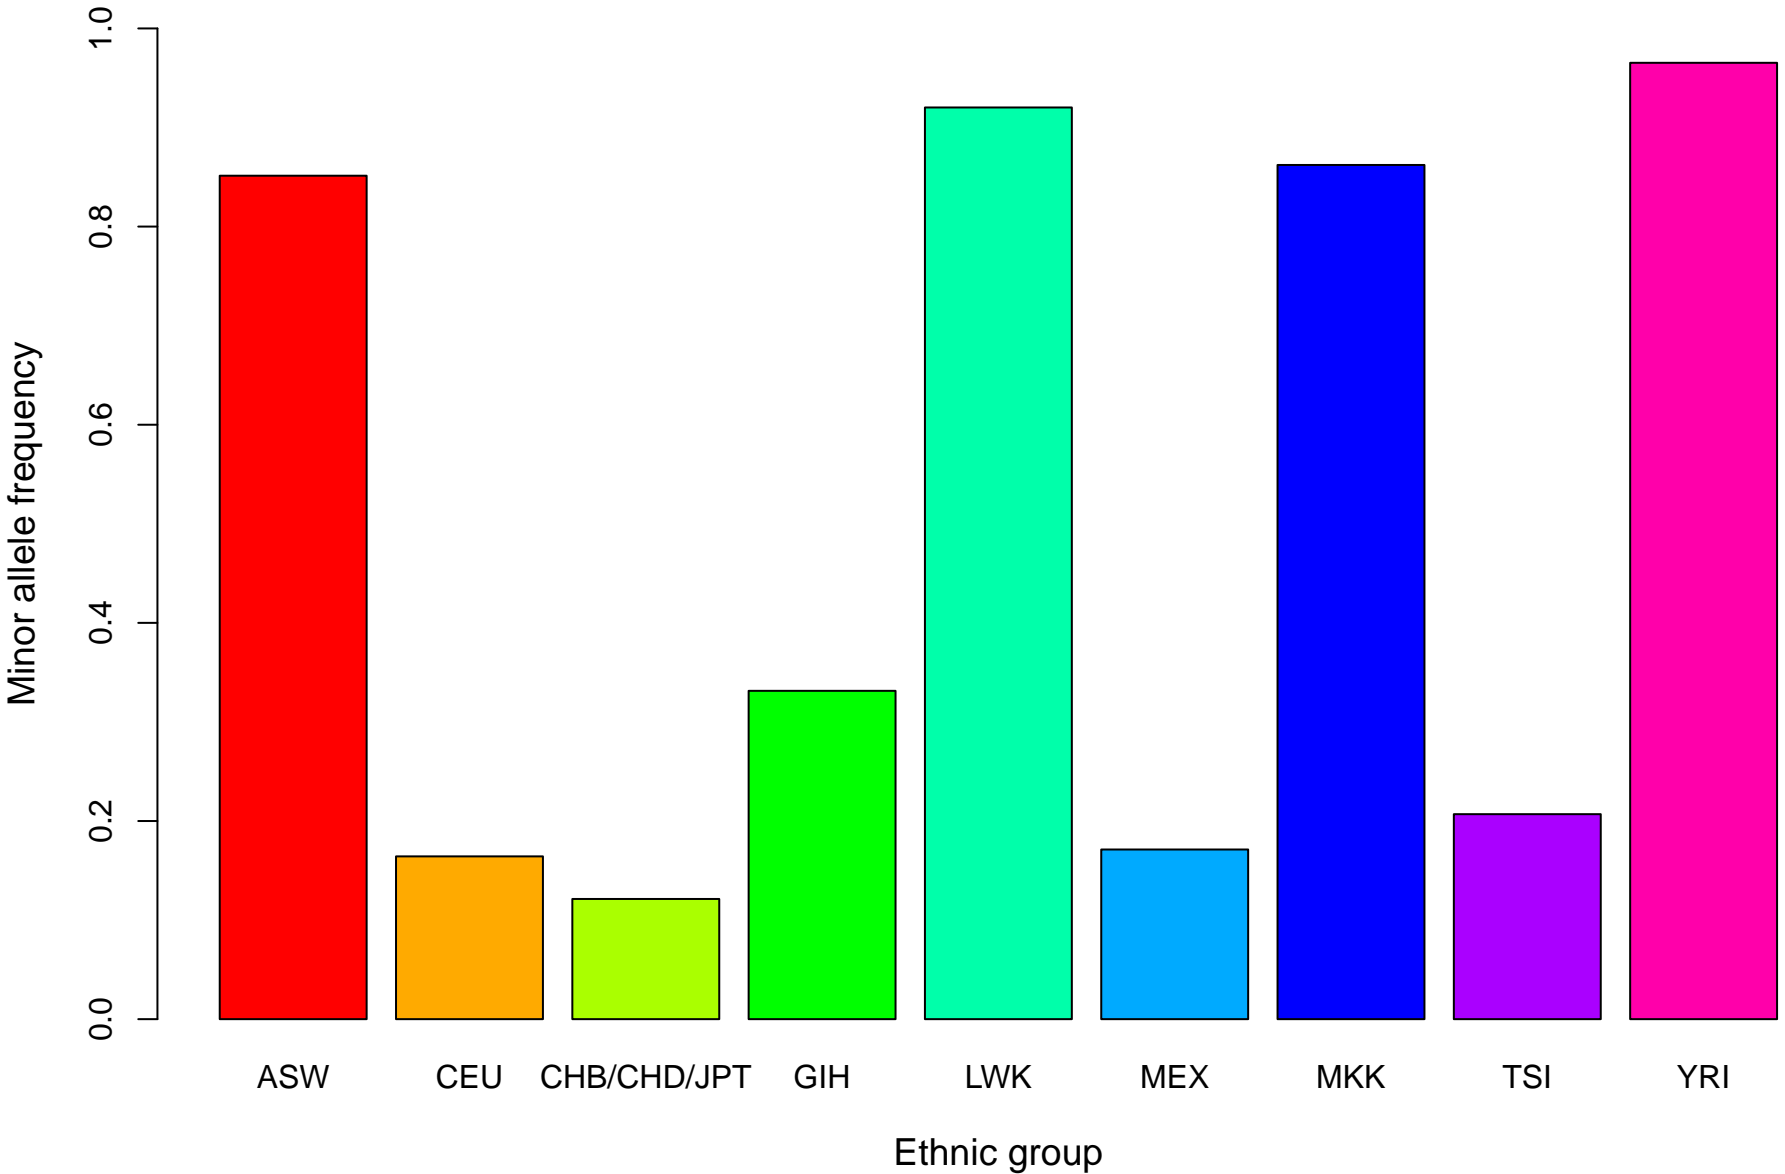

# rs2421555\_A

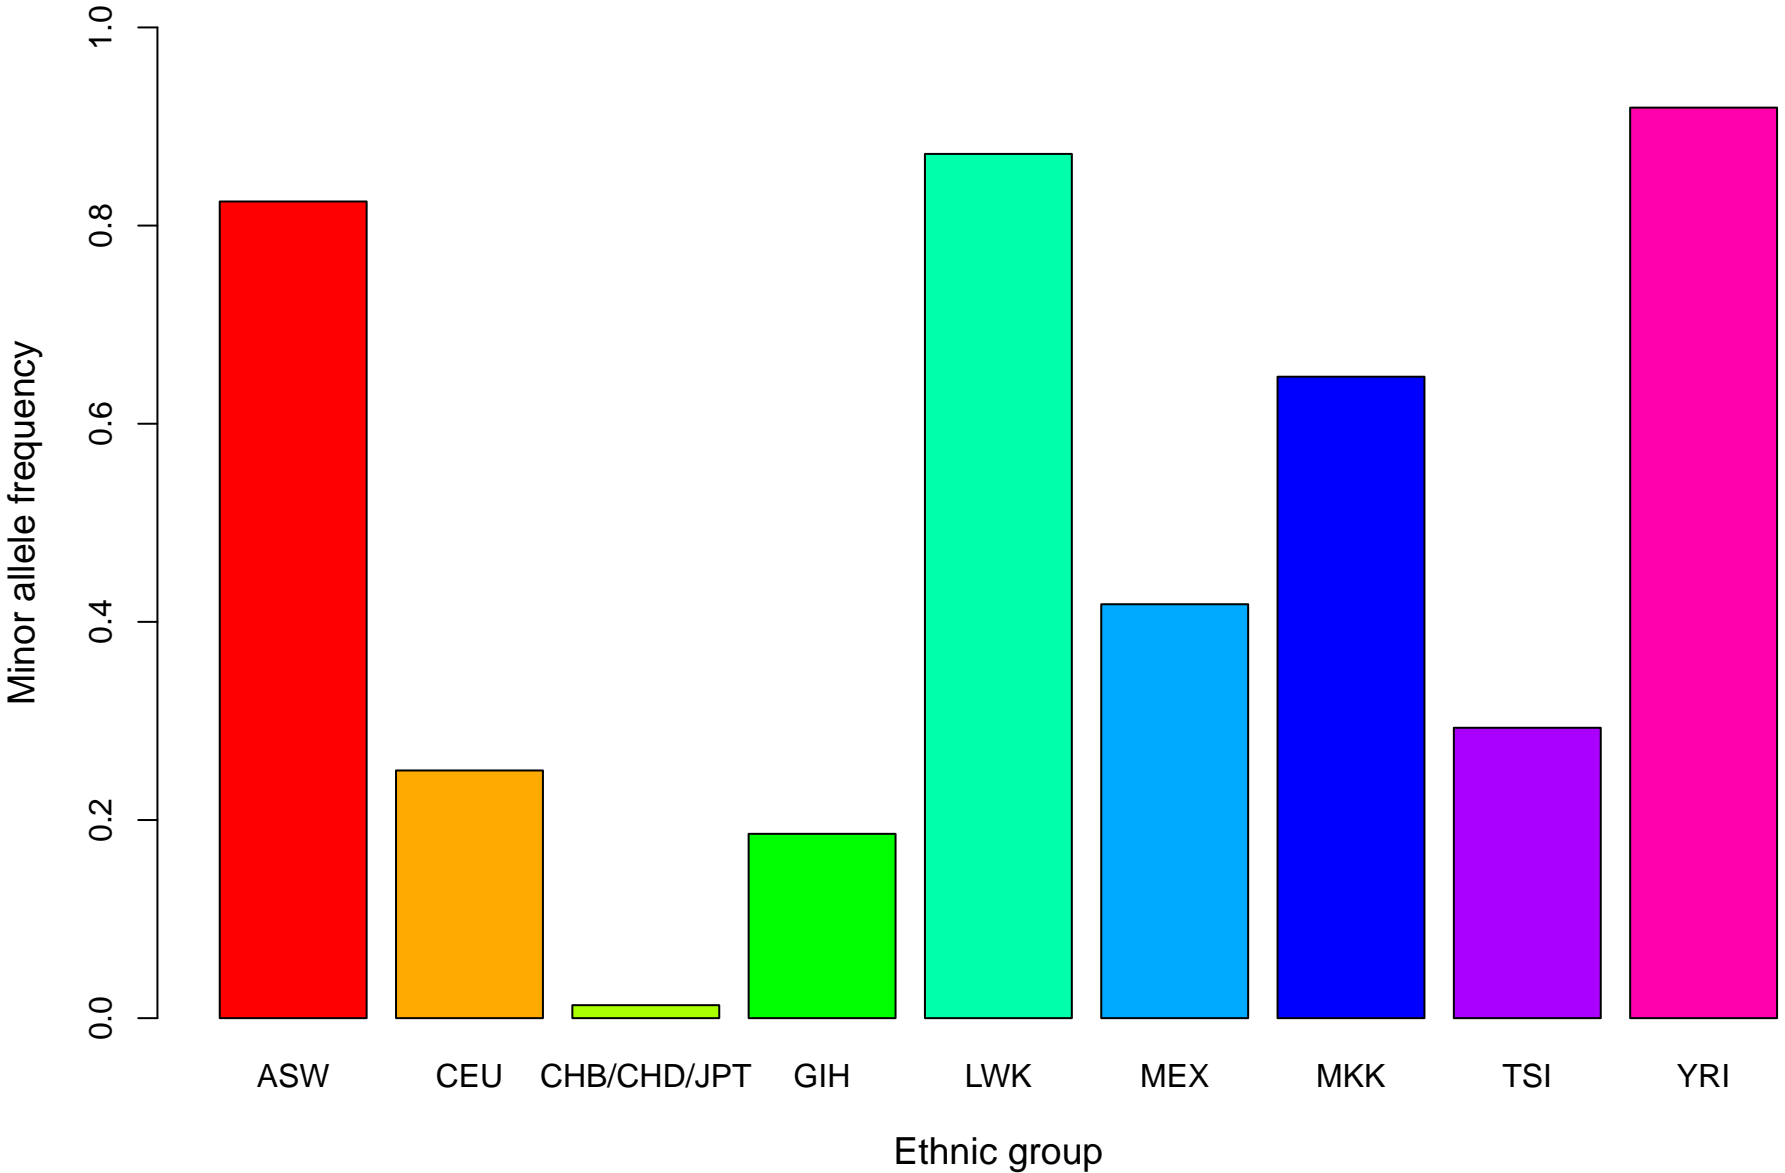

# rs6706373\_C

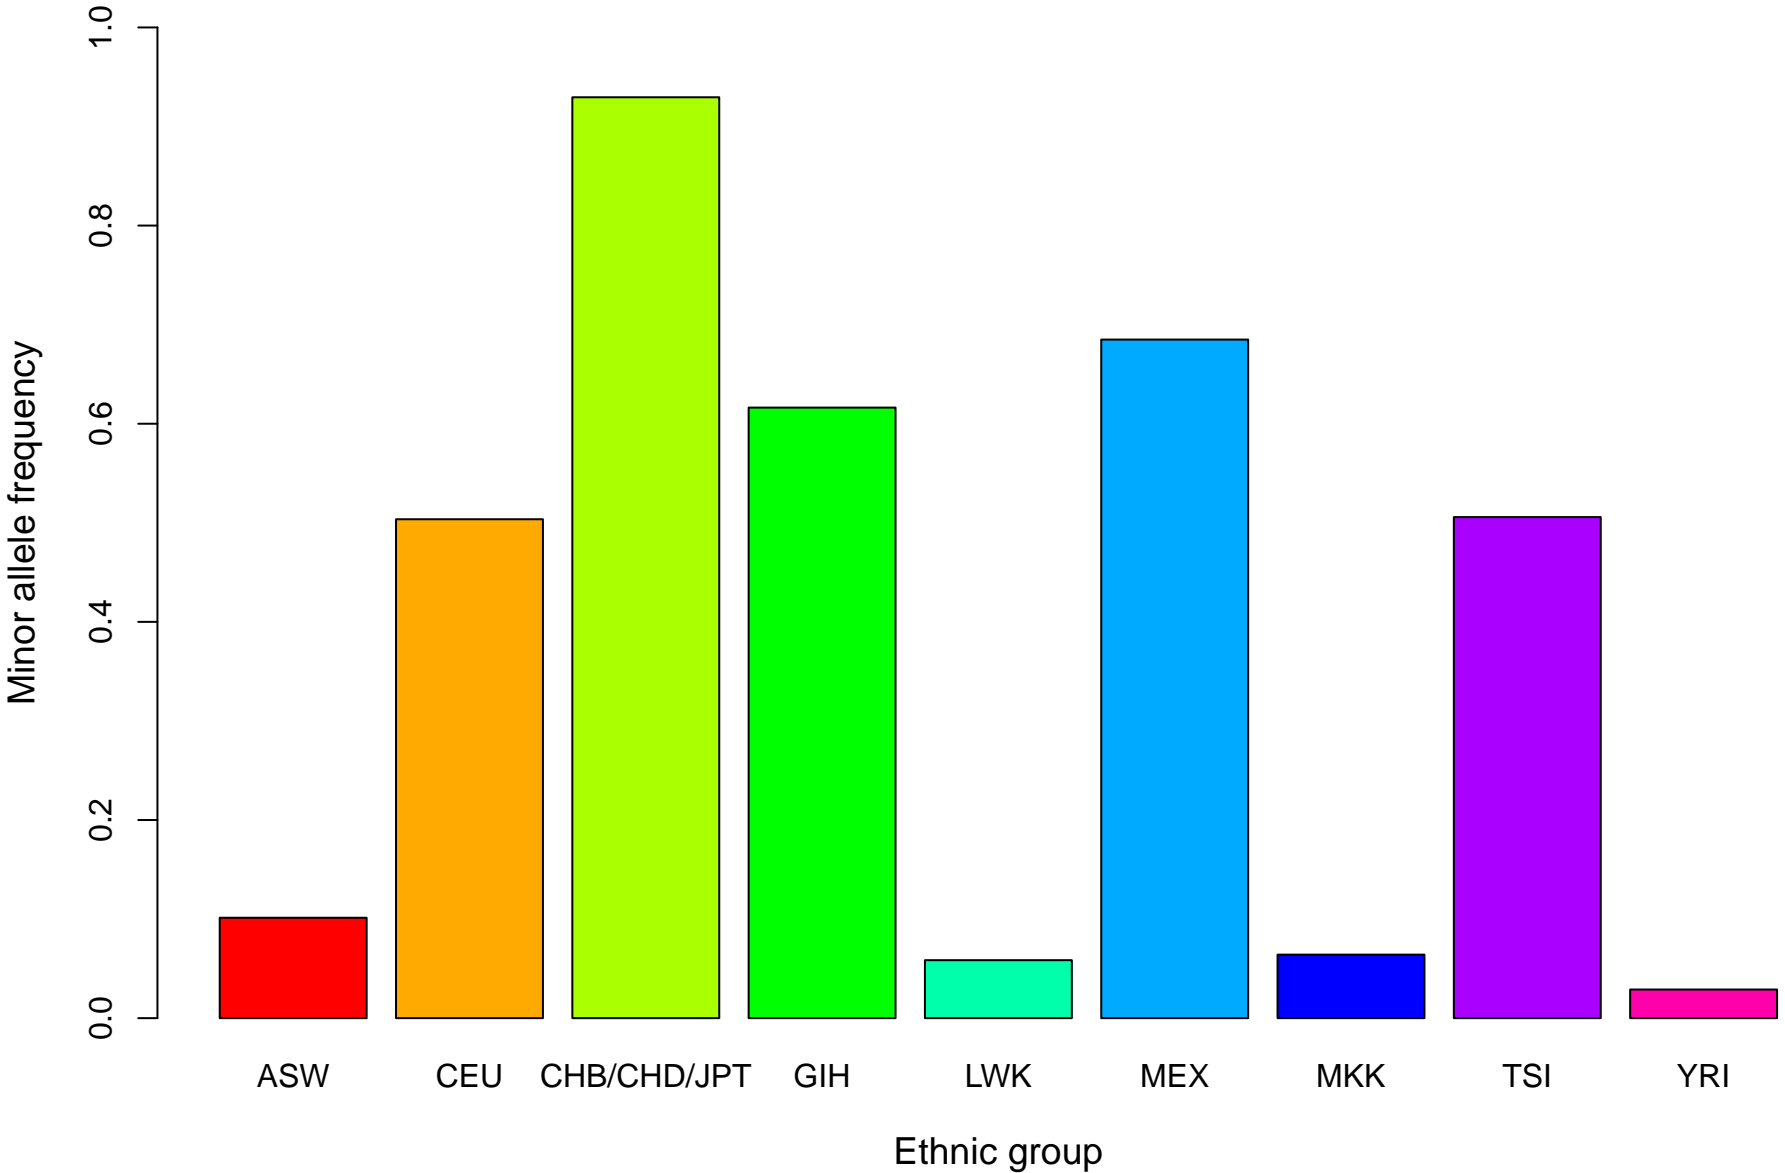

# rs6980856\_G

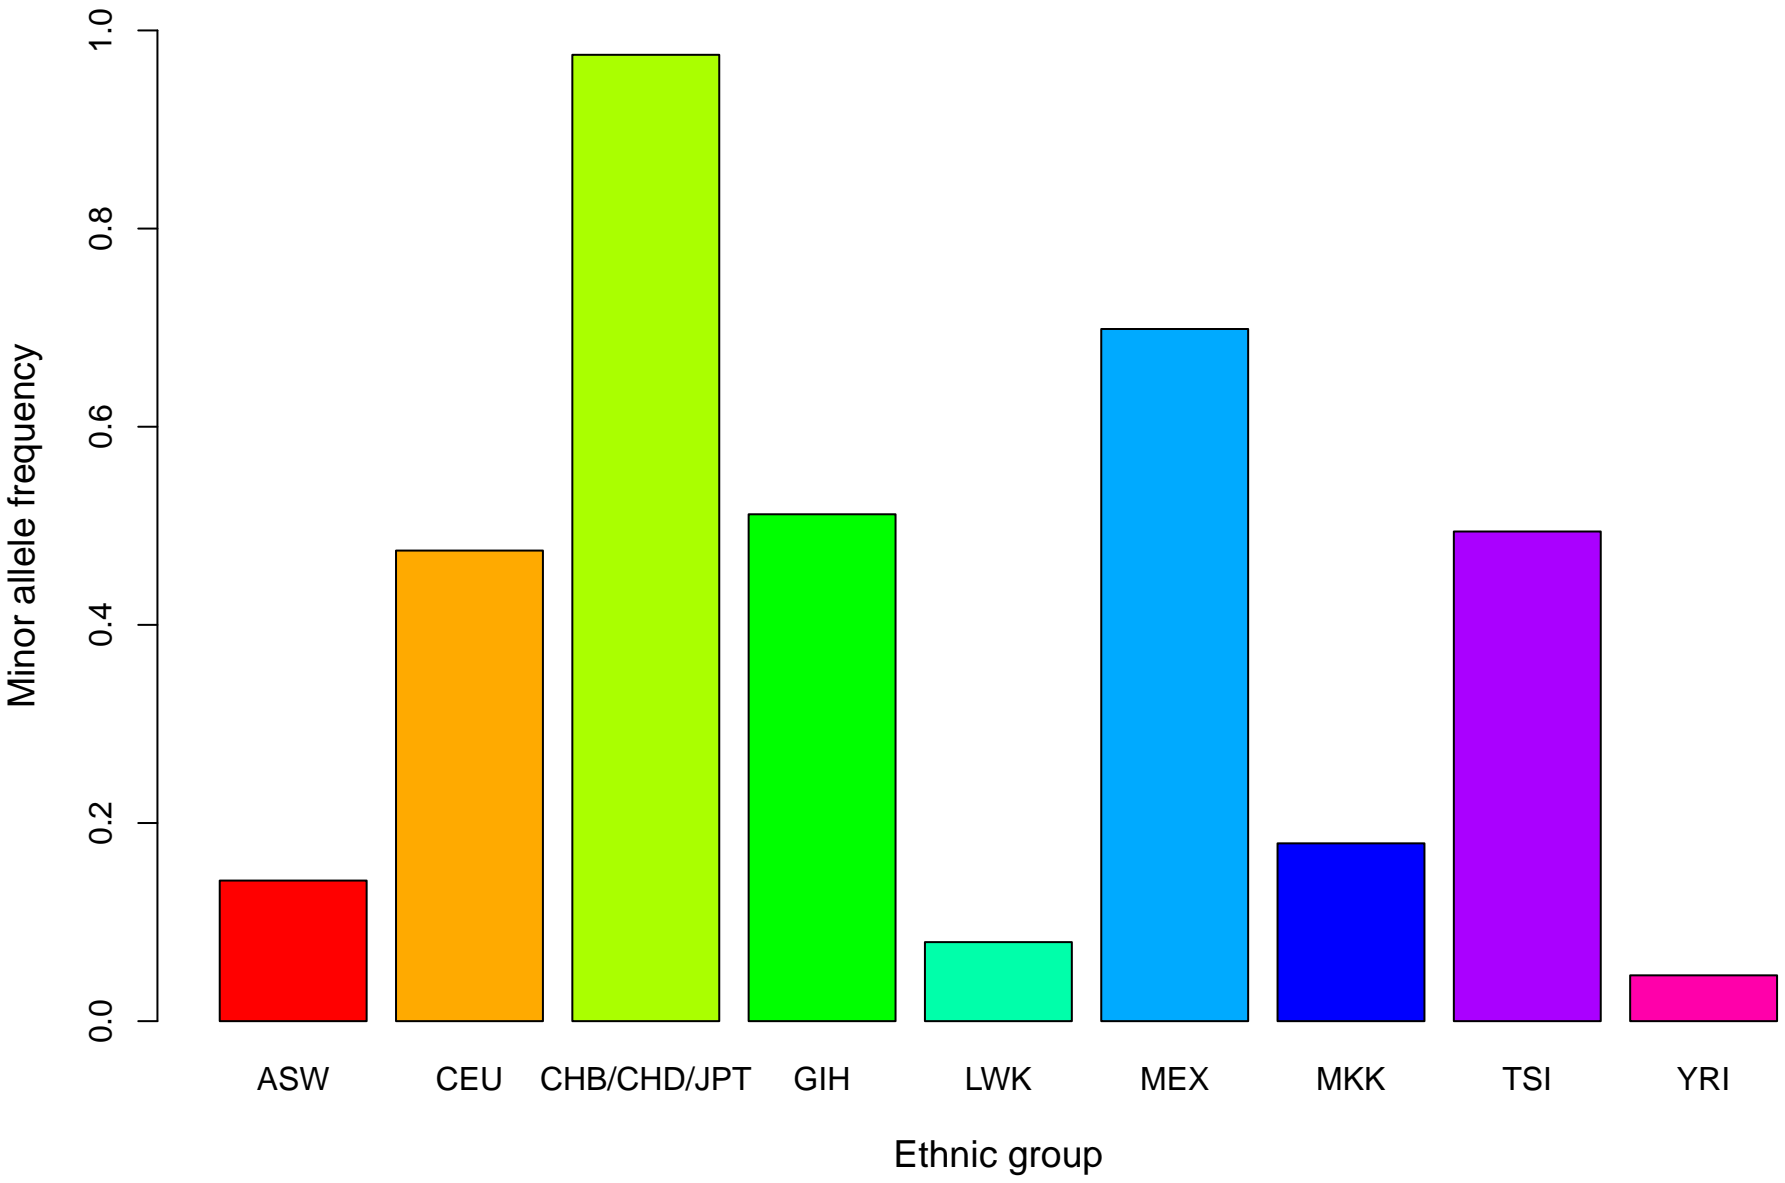

# rs7555643\_A

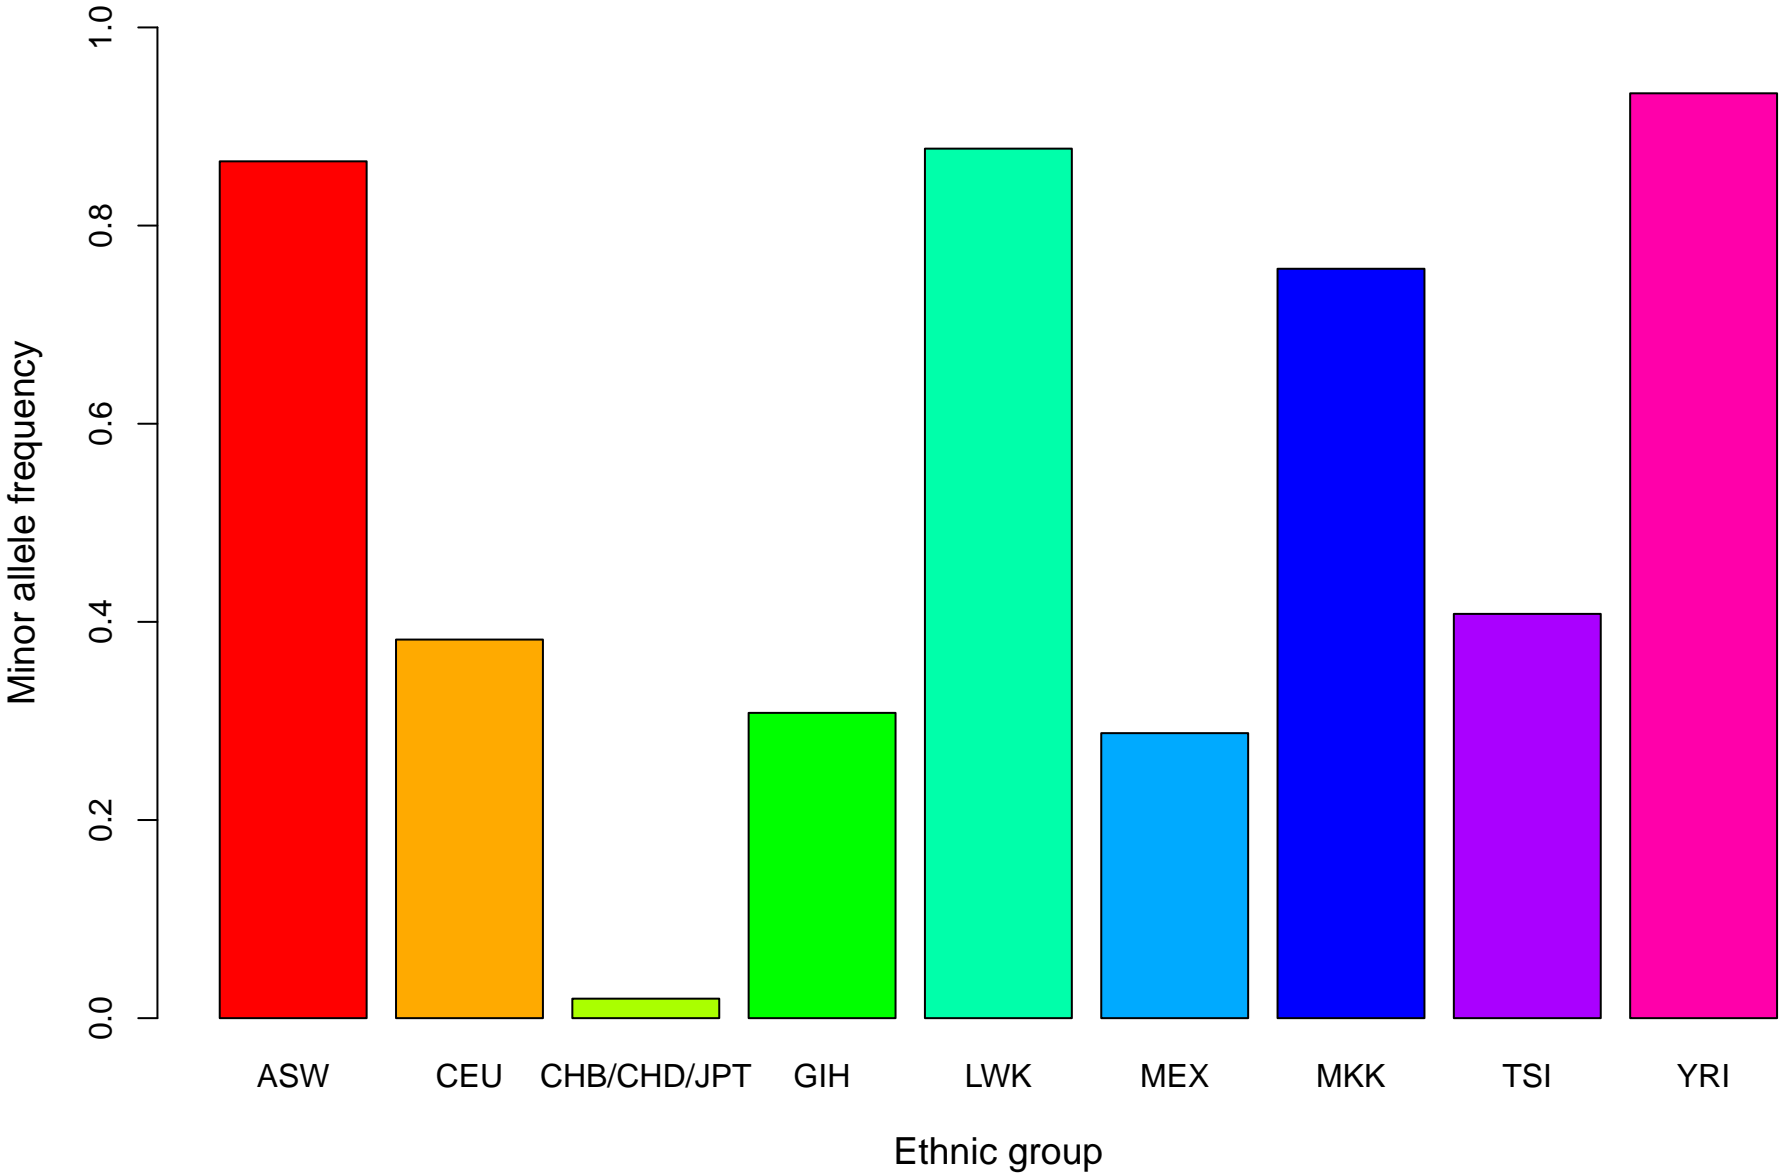

# rs4920216\_G

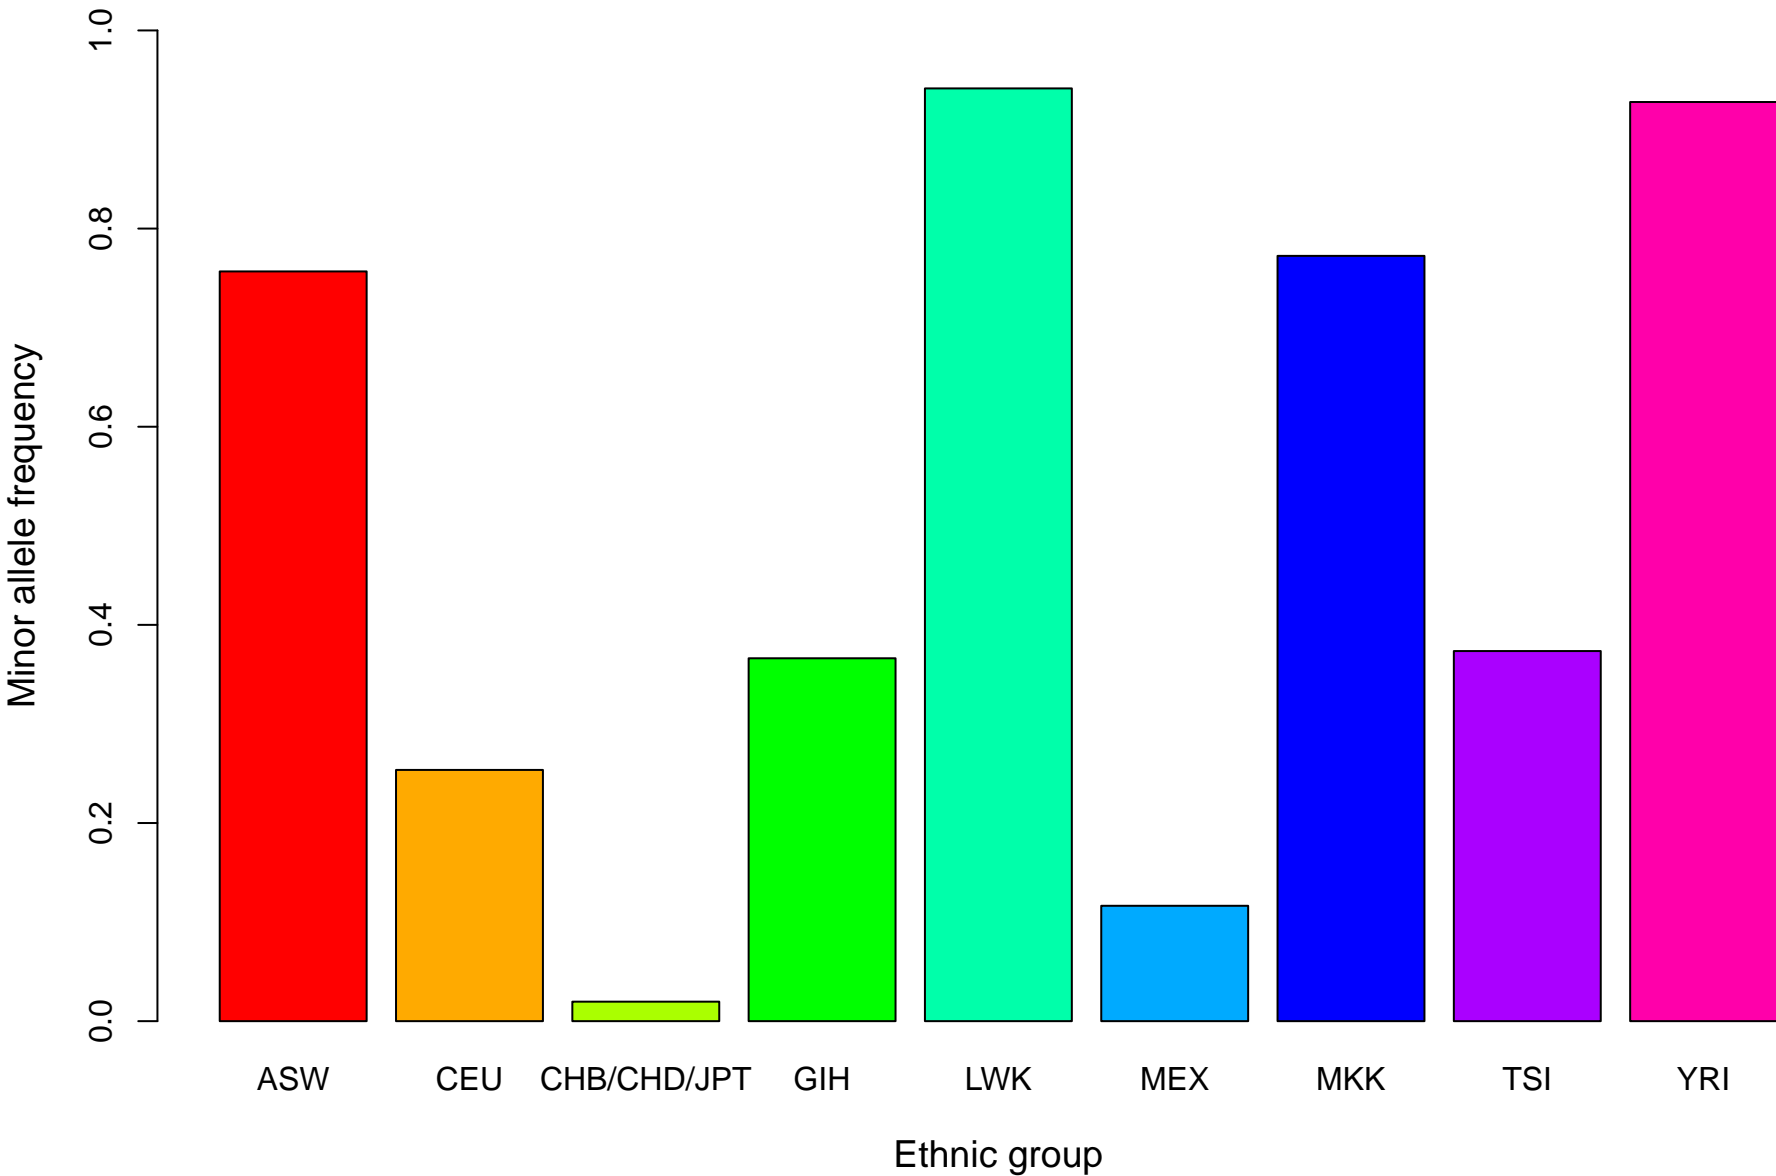

# rs1056484\_T

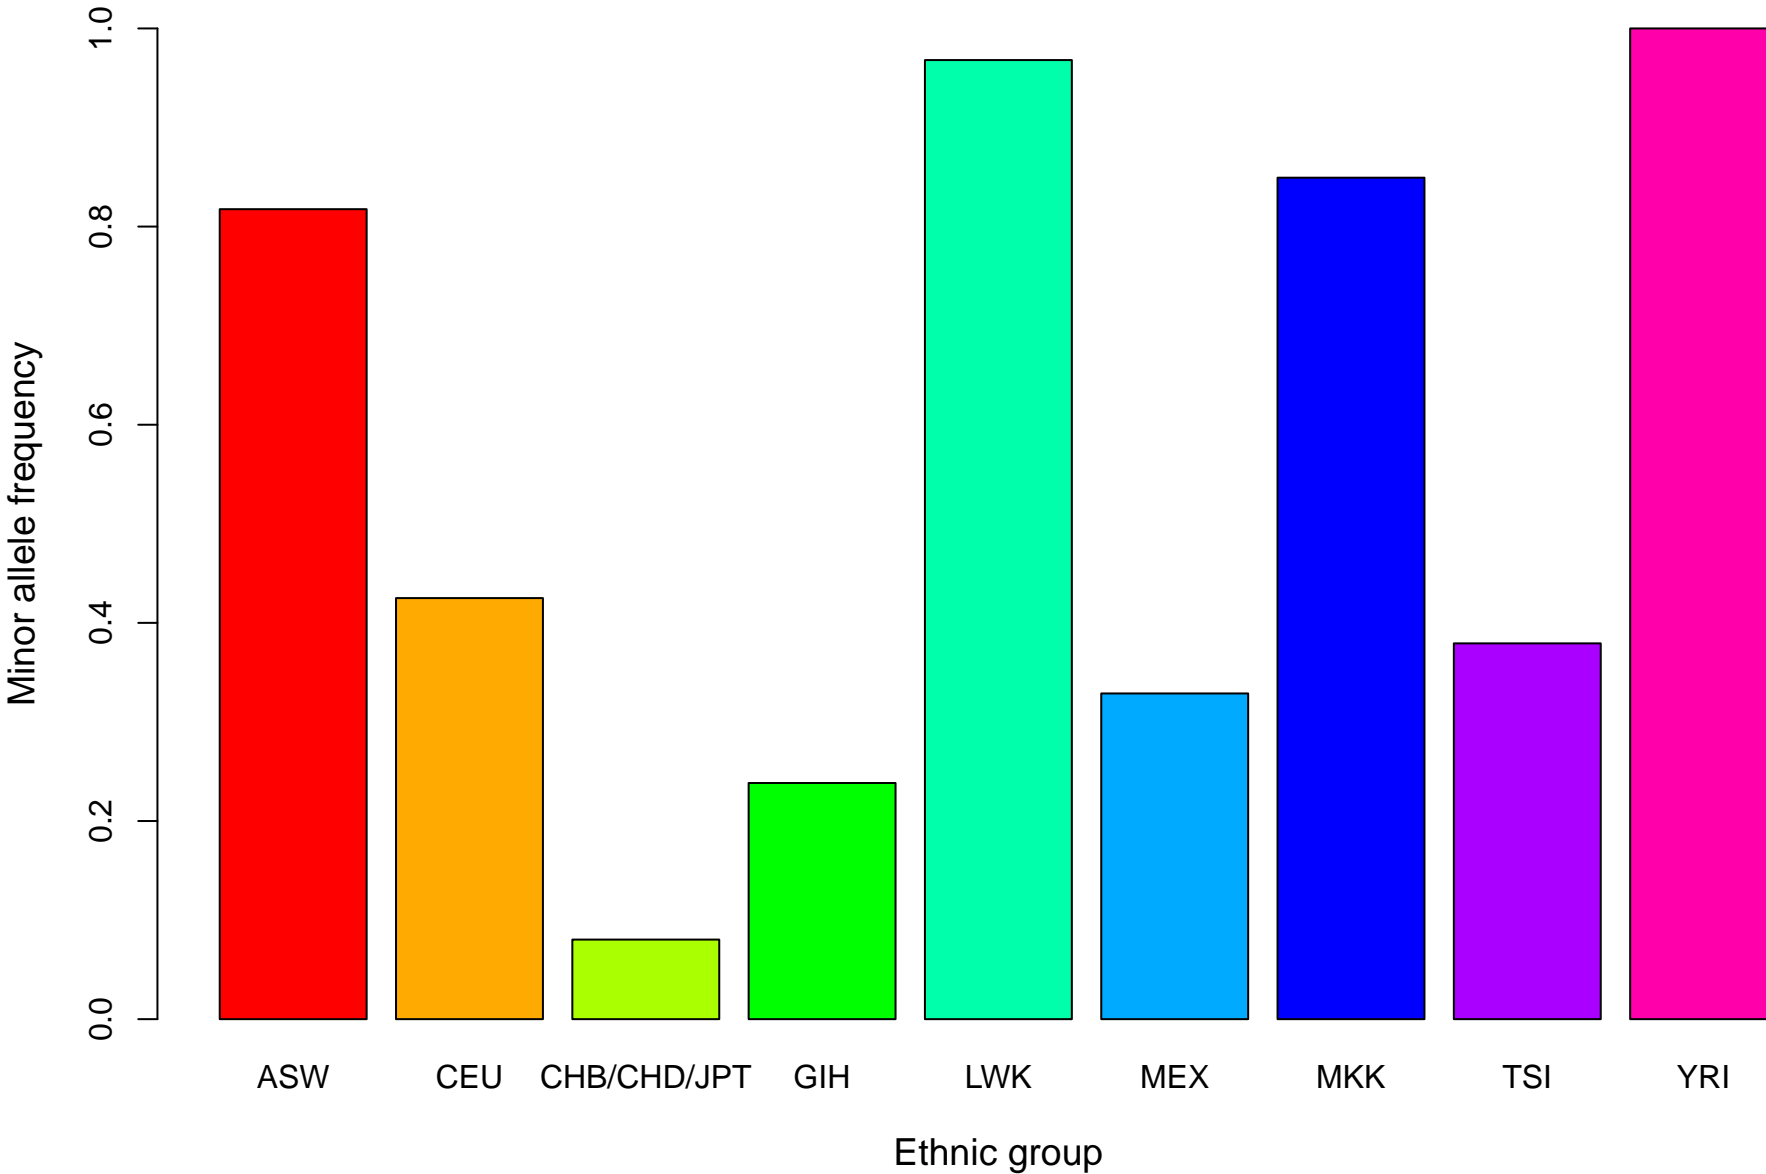

# rs1860230\_T

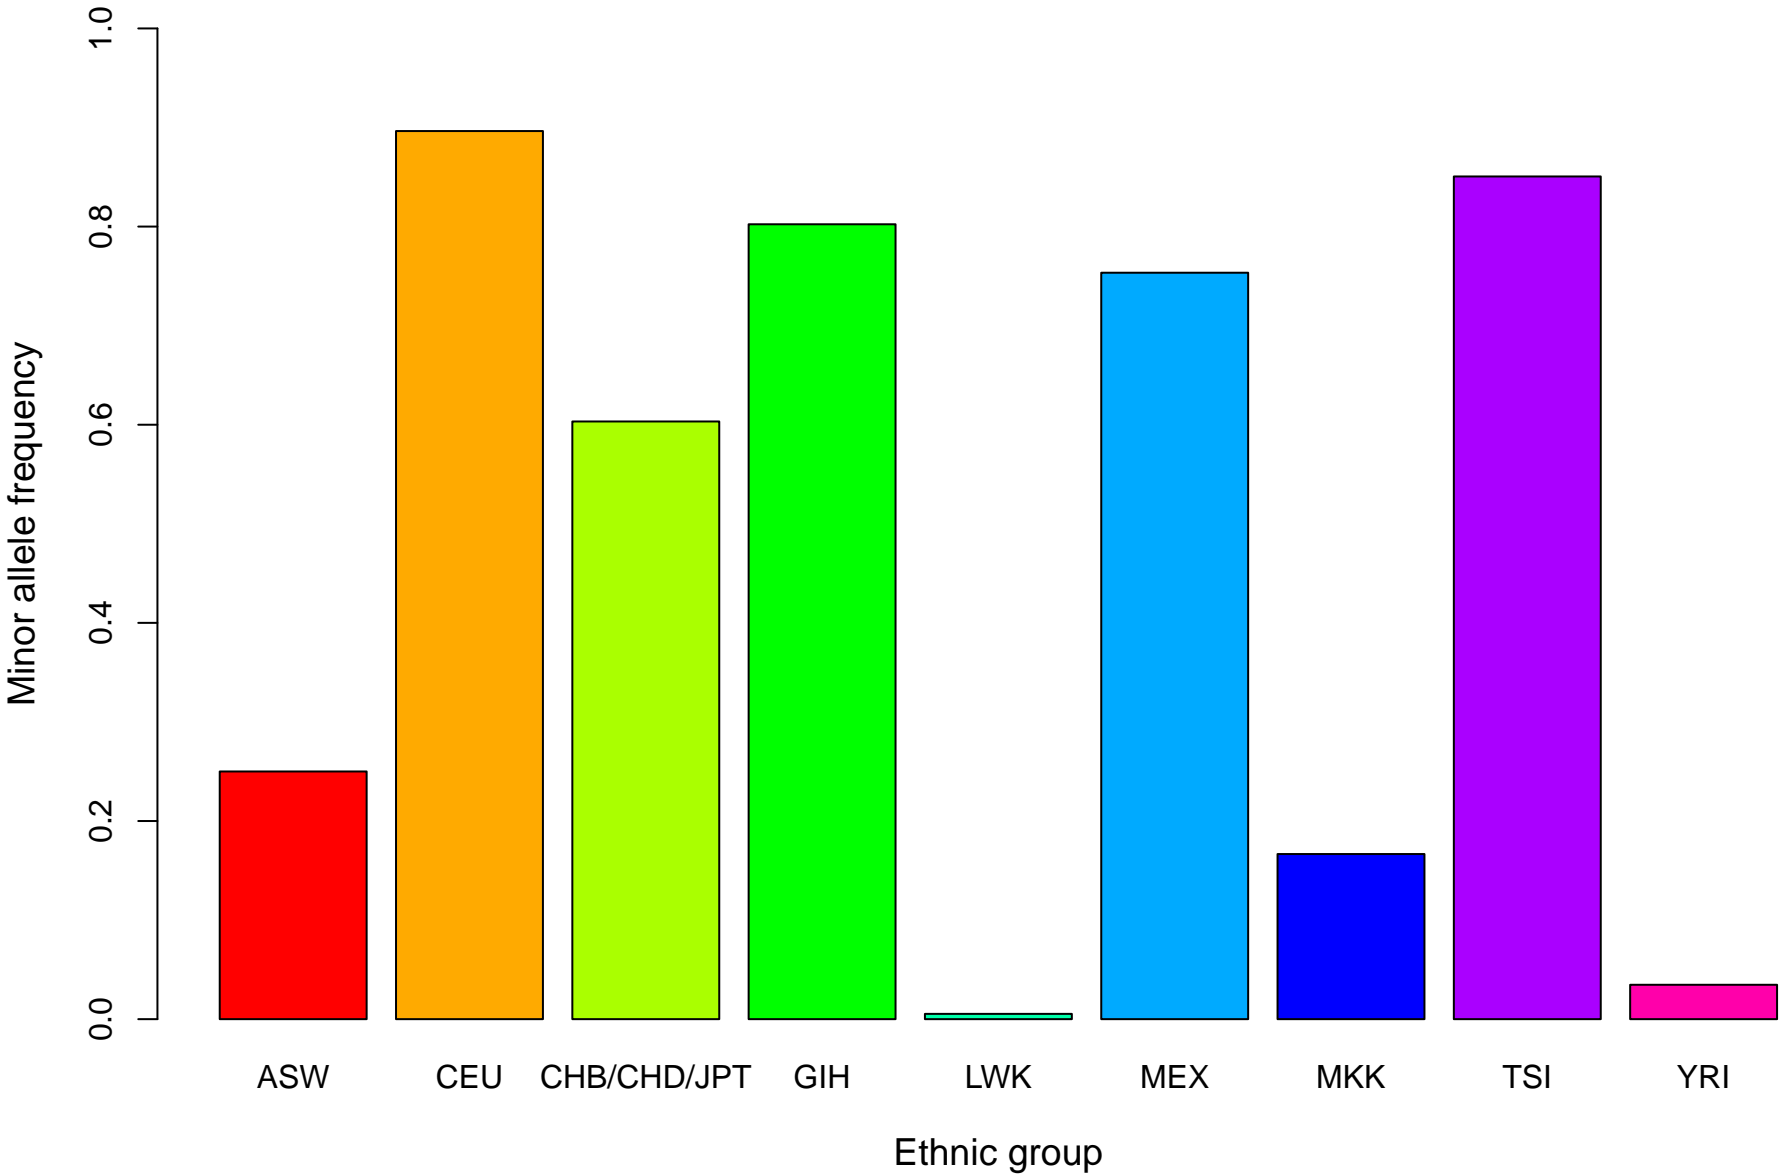



# rs2469798\_T

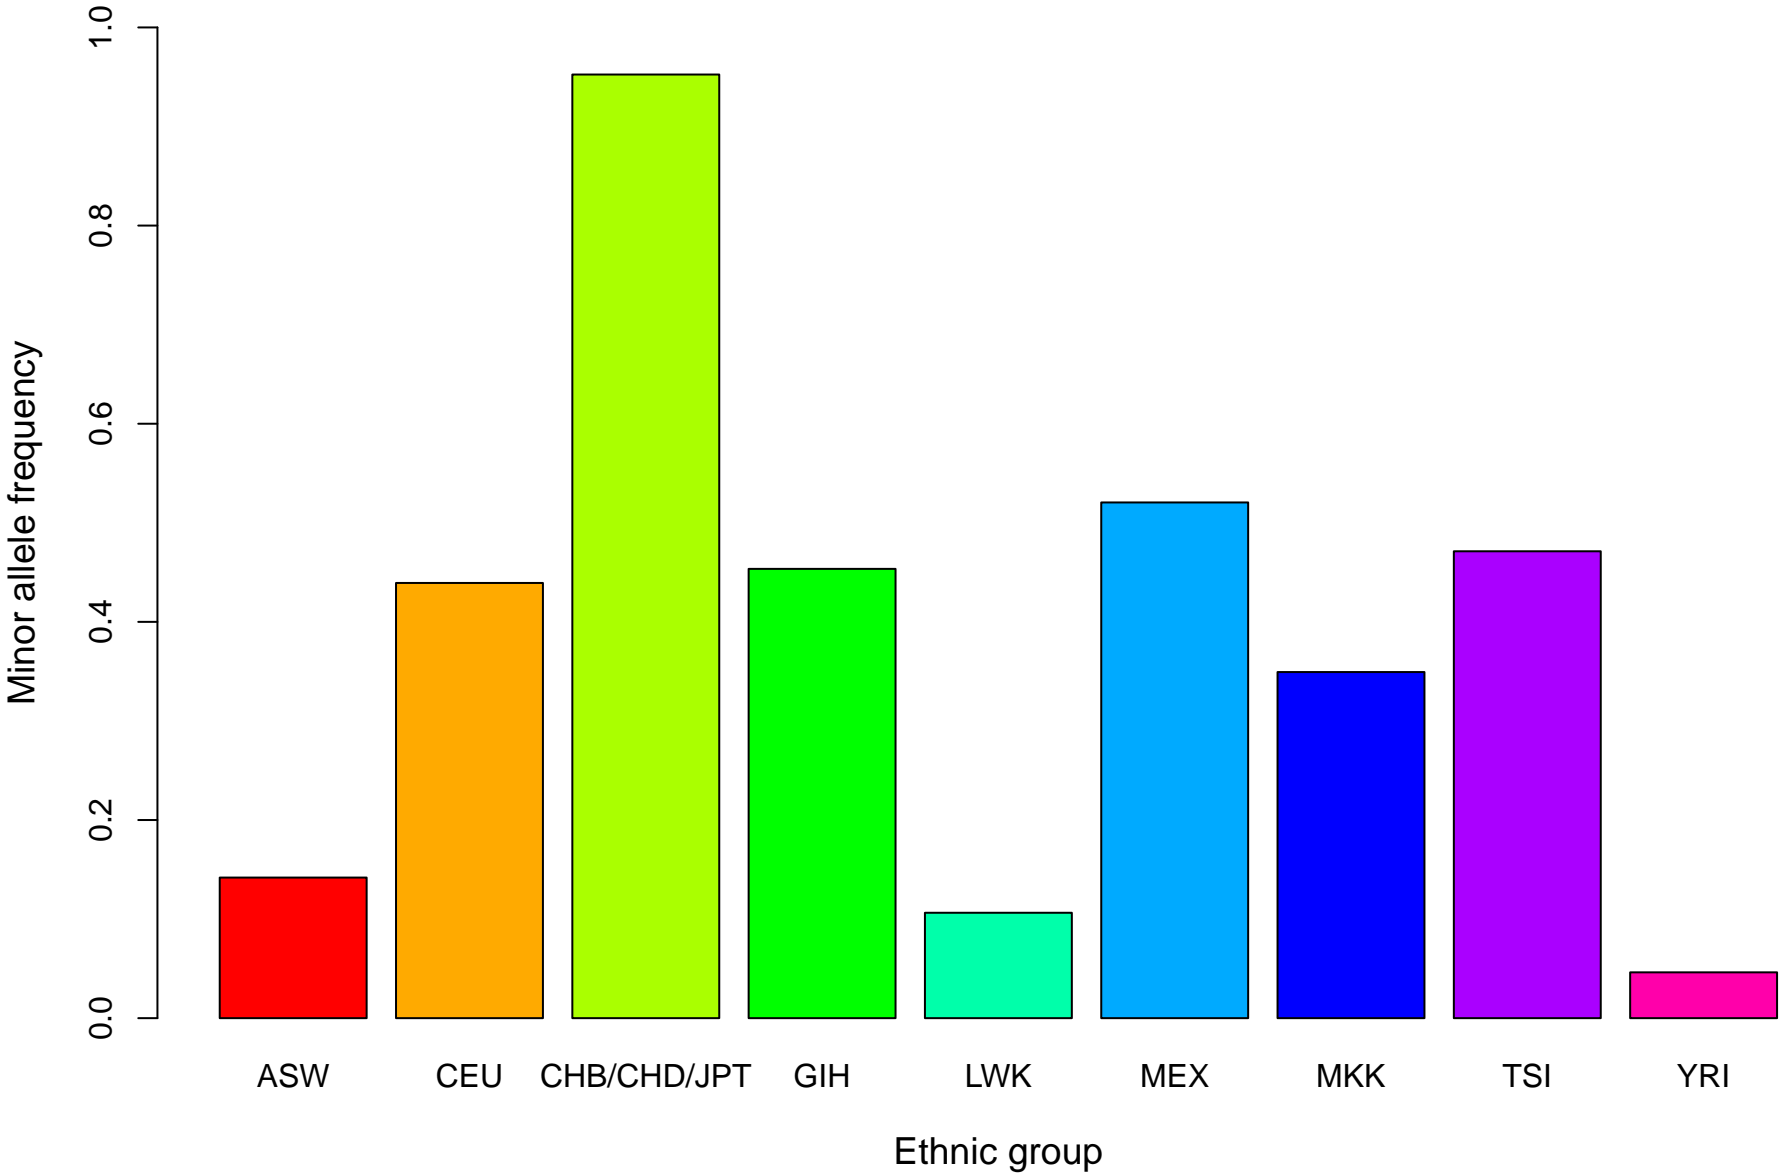

# rs6471166\_G

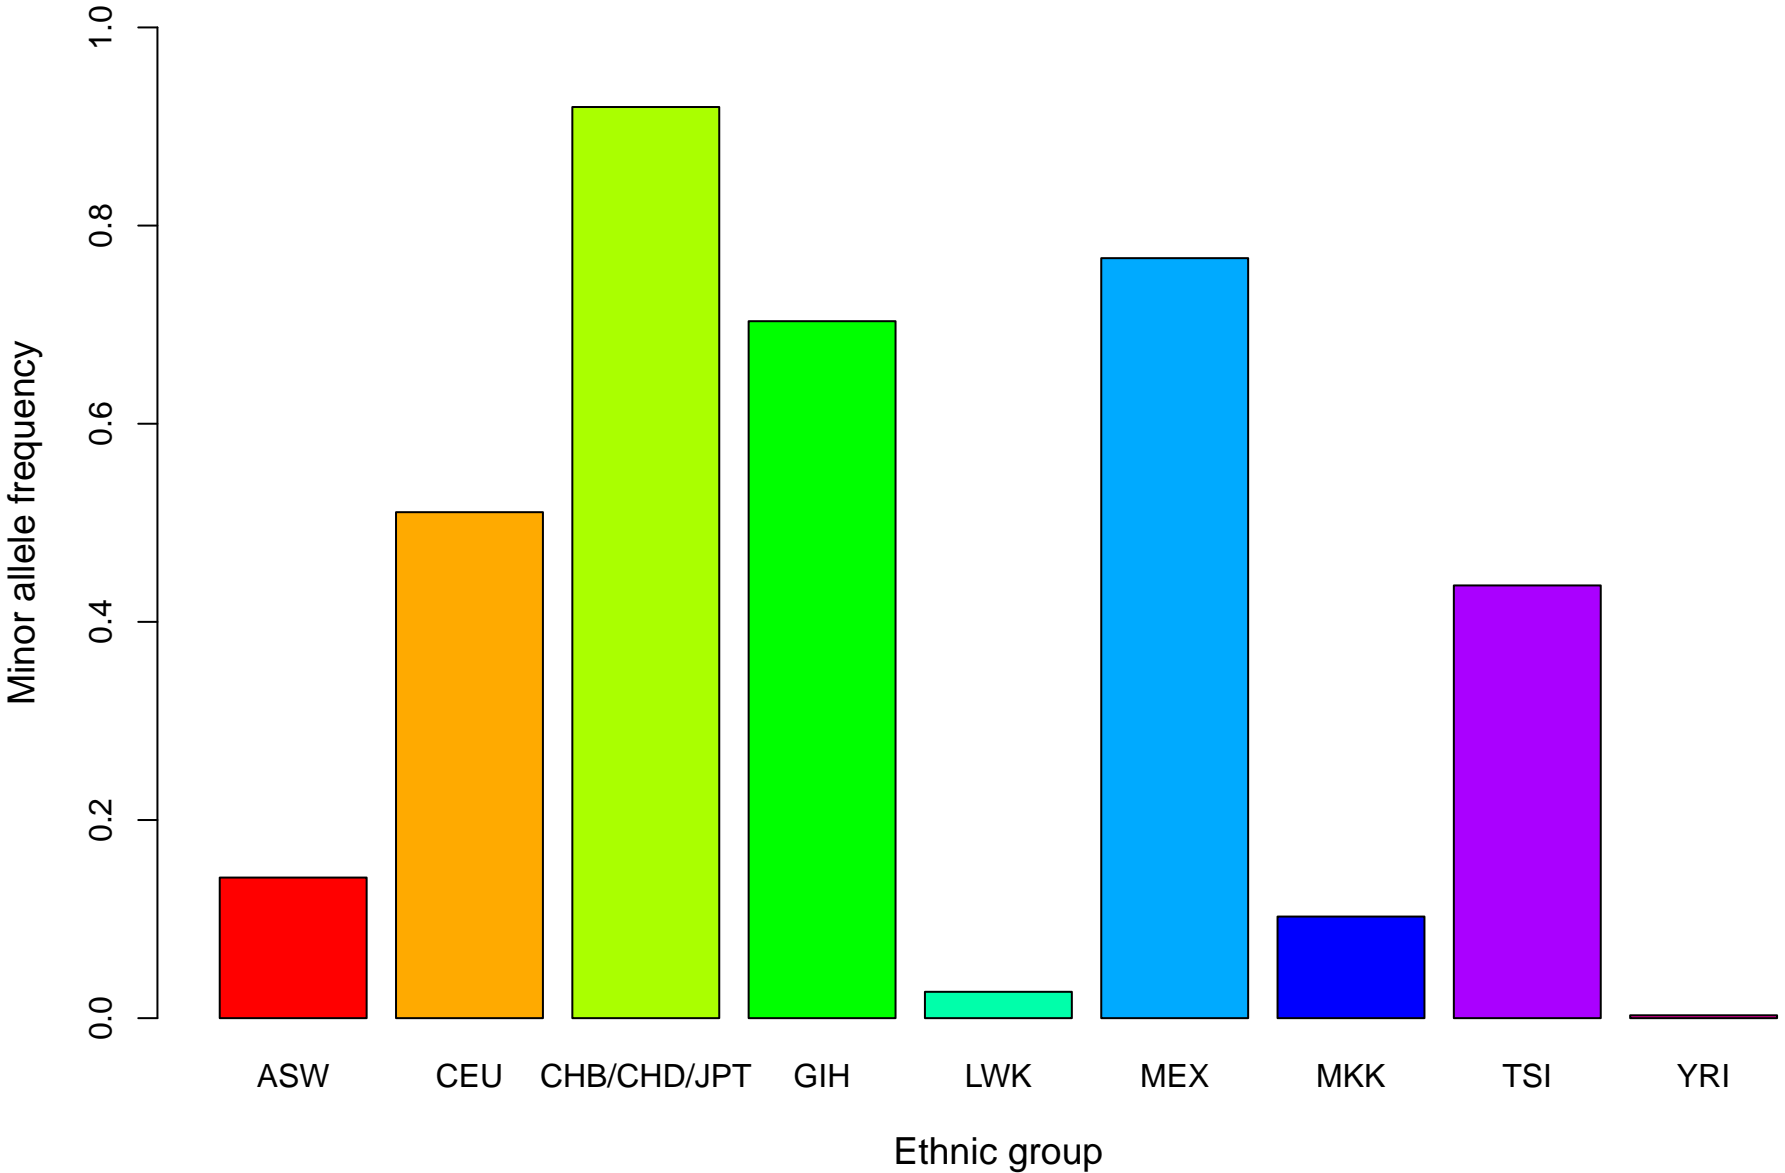

# rs8069636\_A

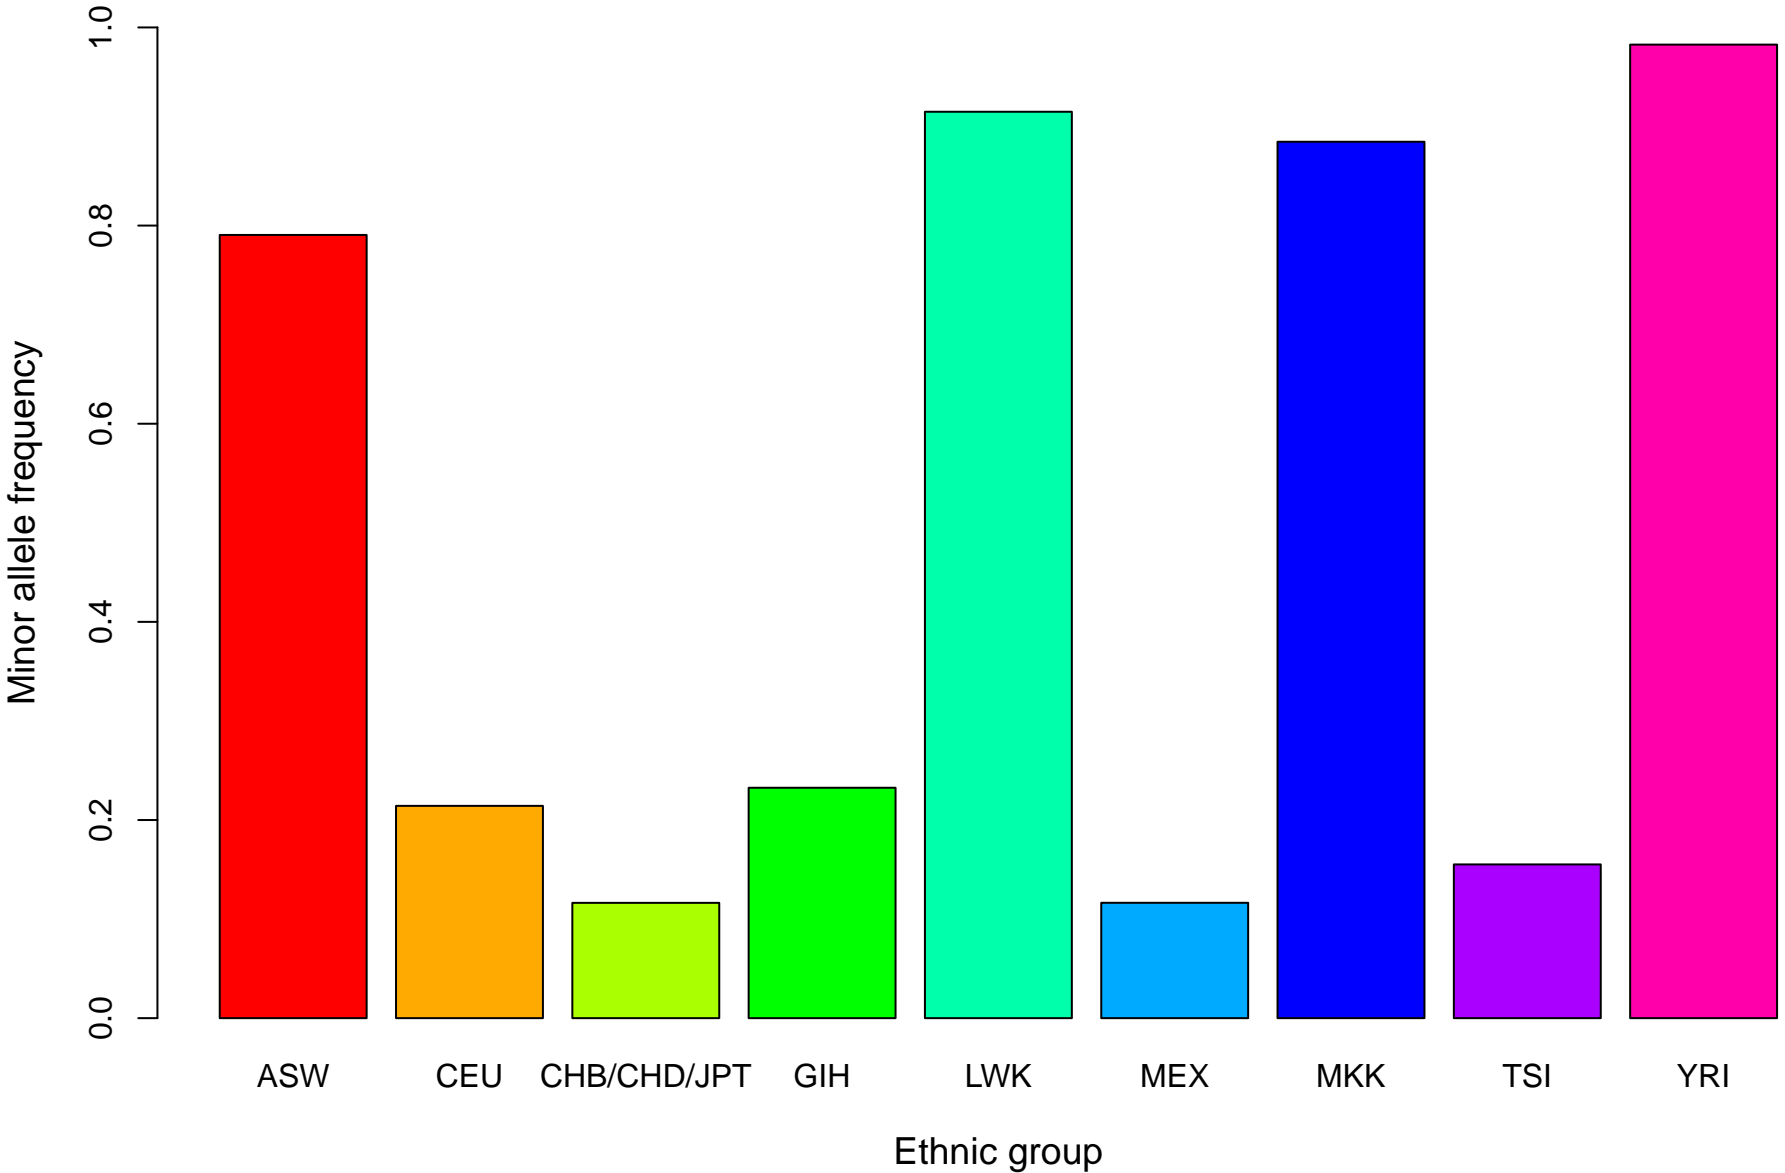

# rs4573885\_A

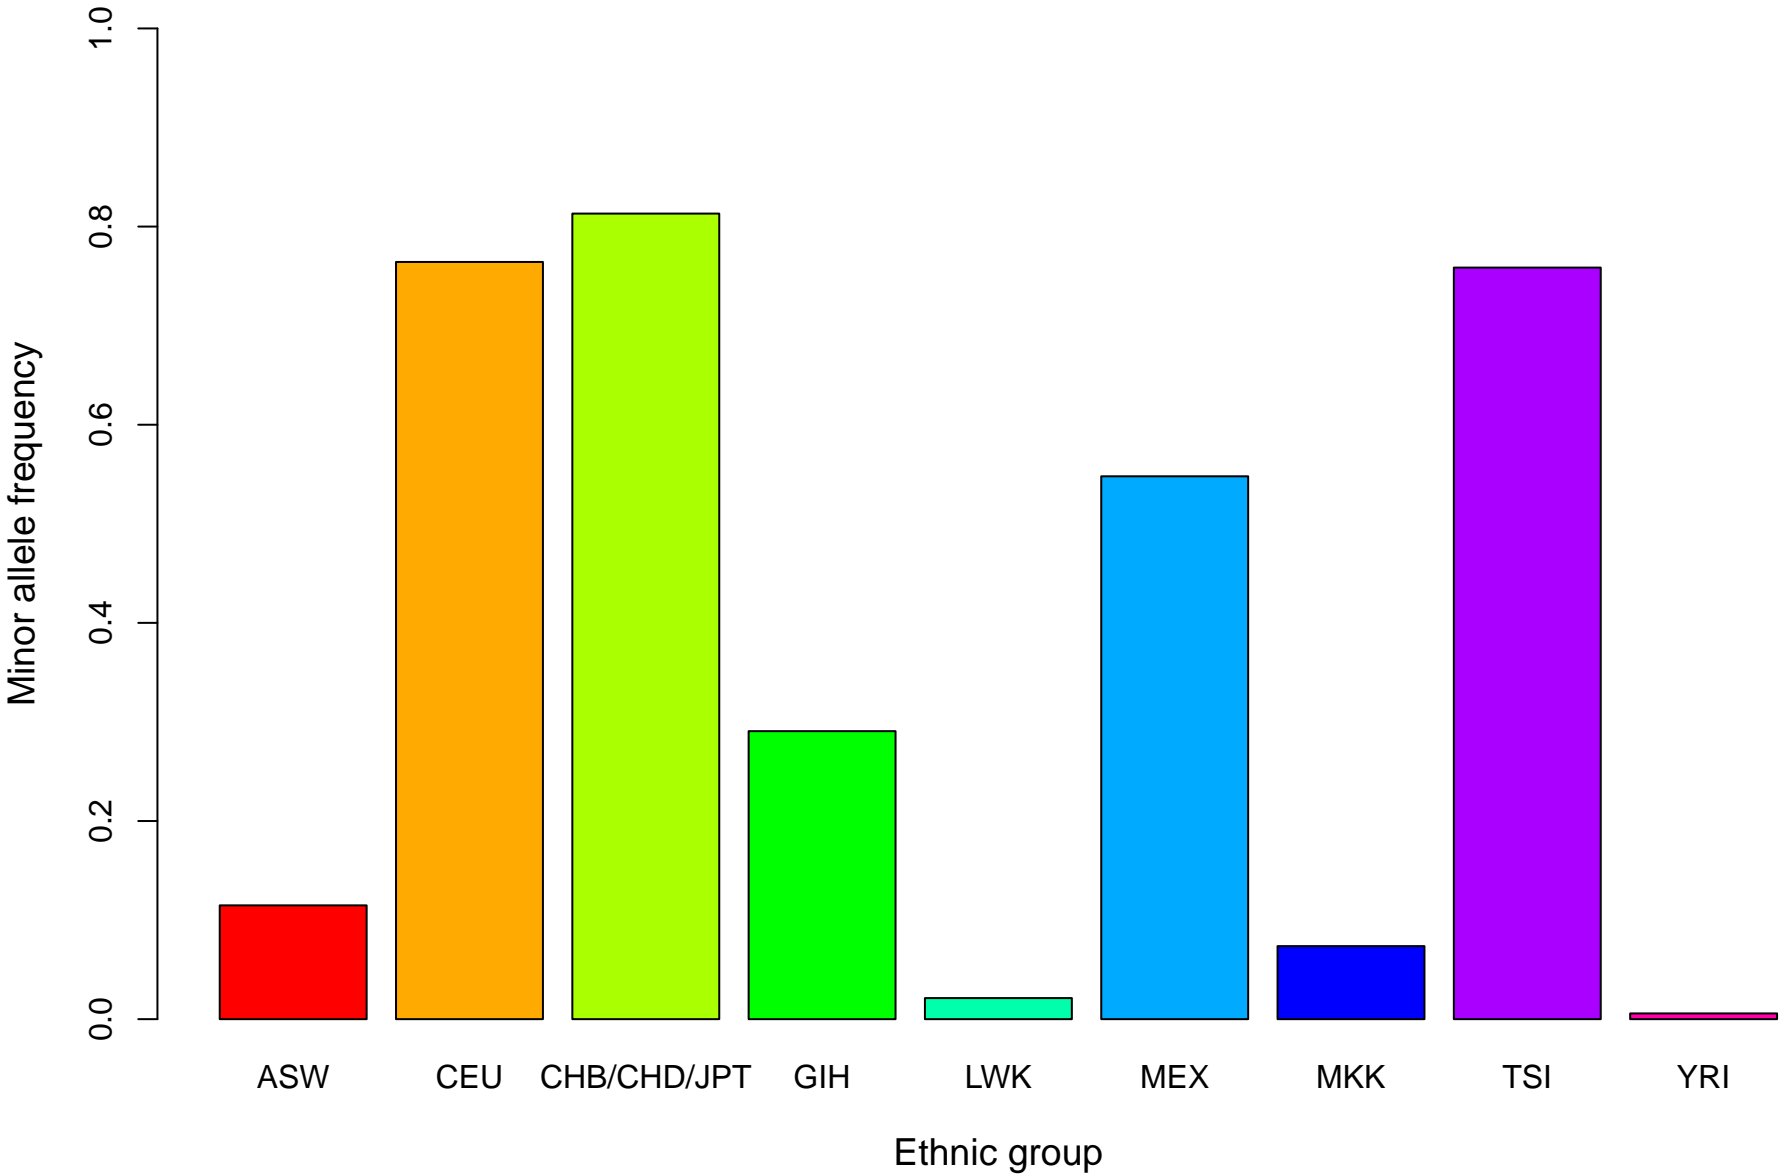

# rs13171314\_T

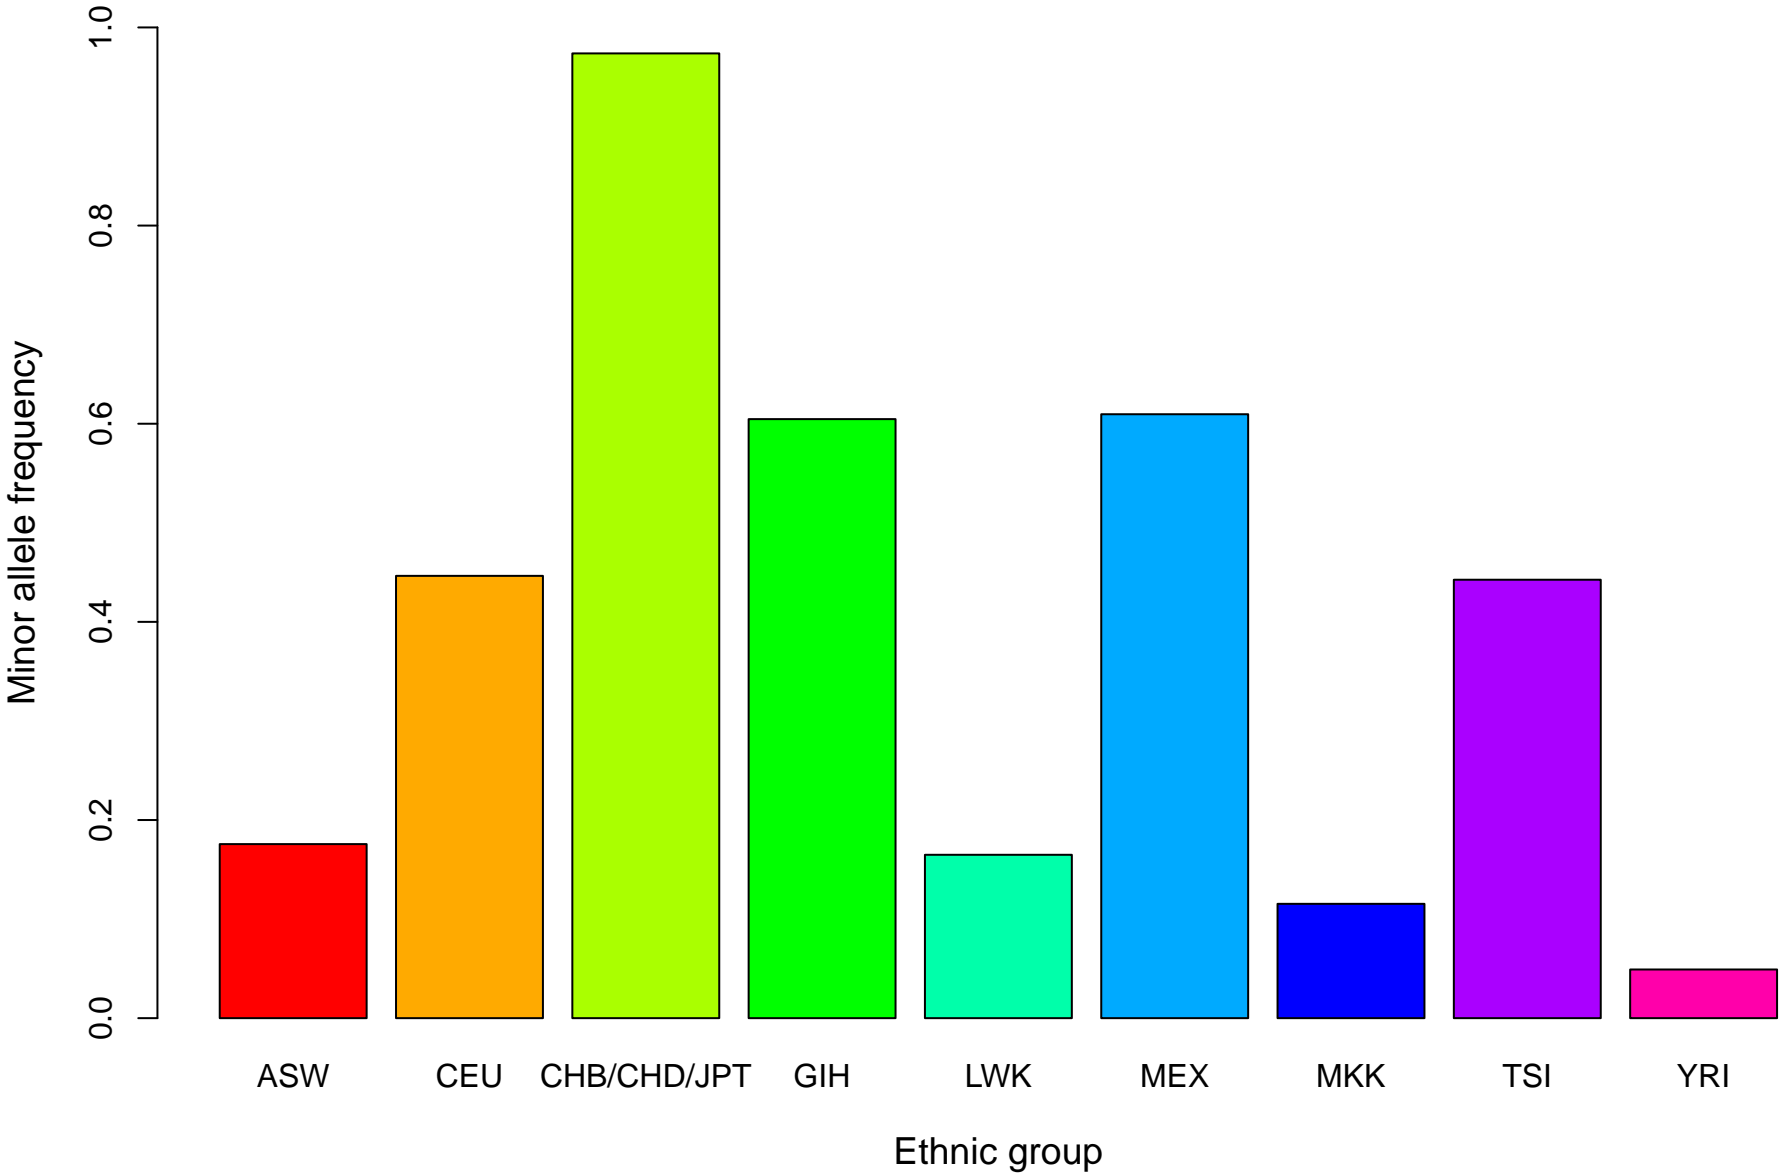

# rs13008515\_C

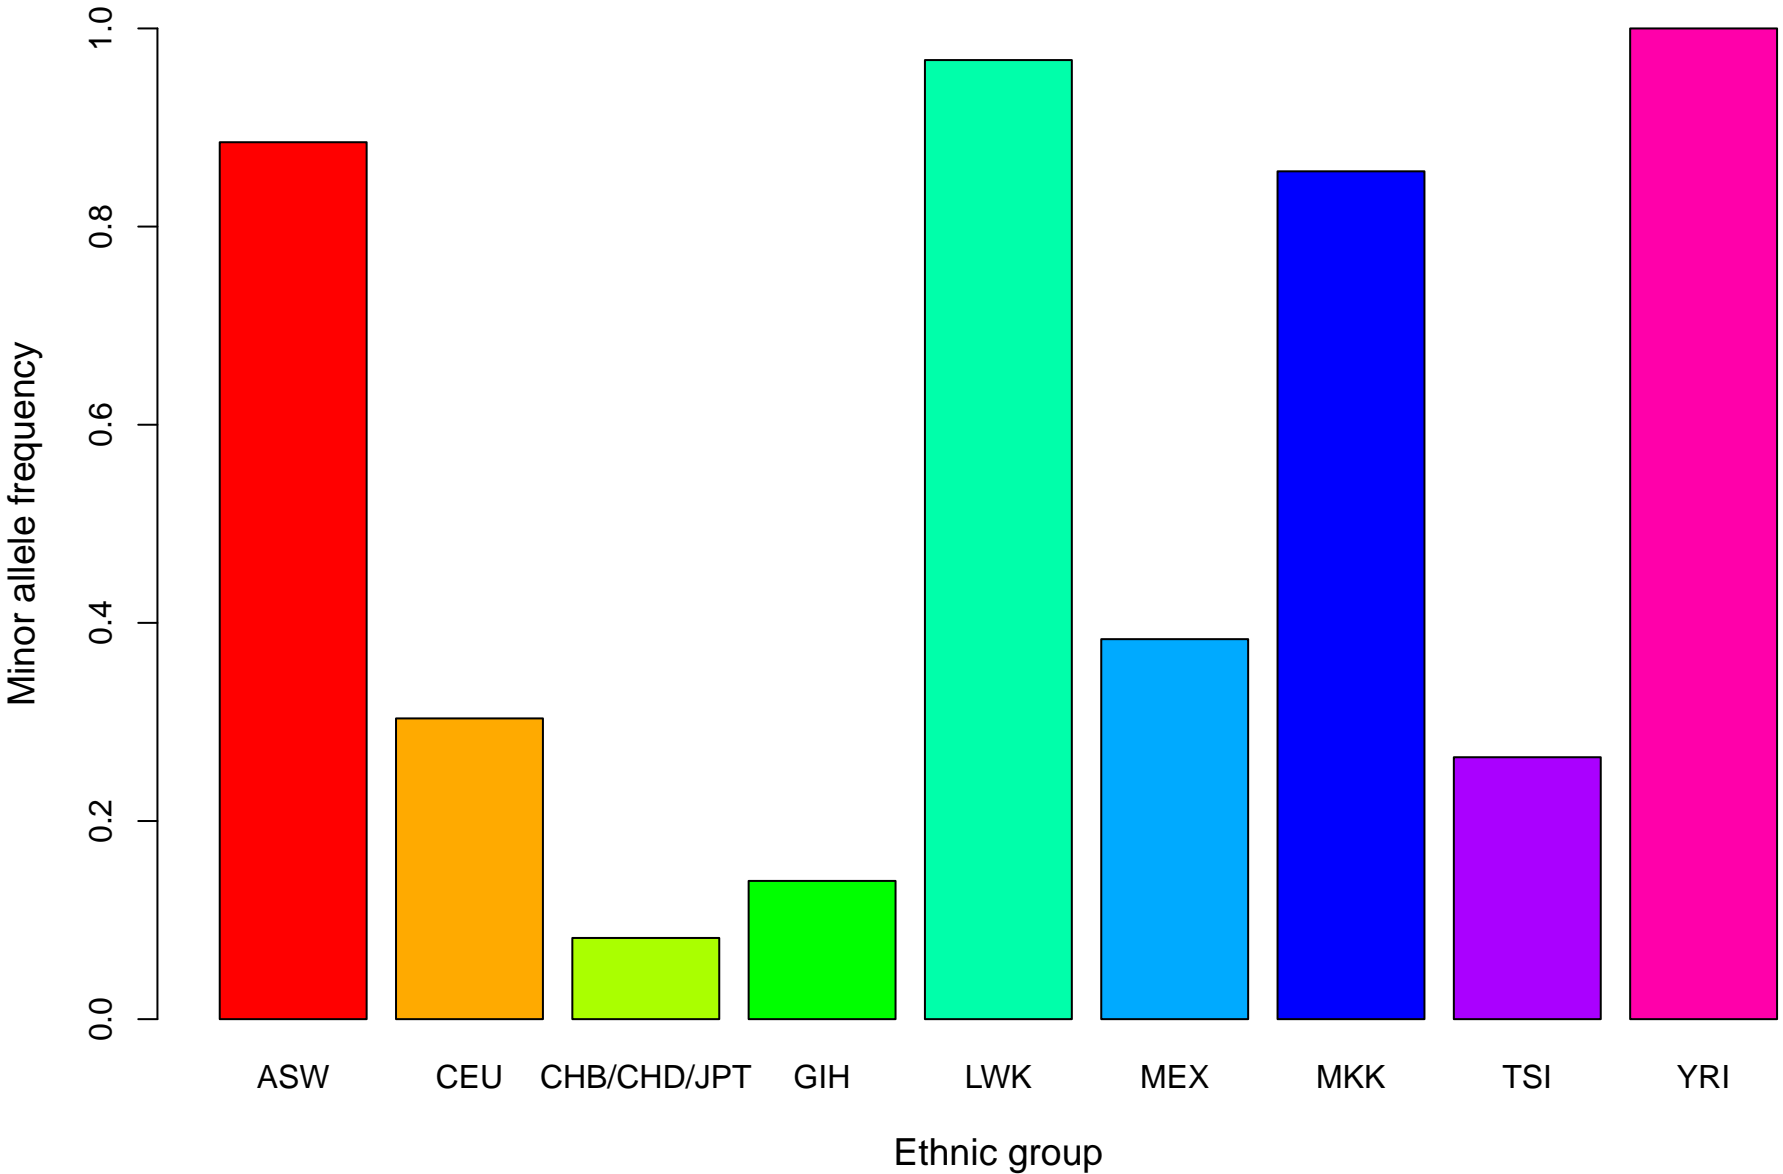

# rs4240793\_A

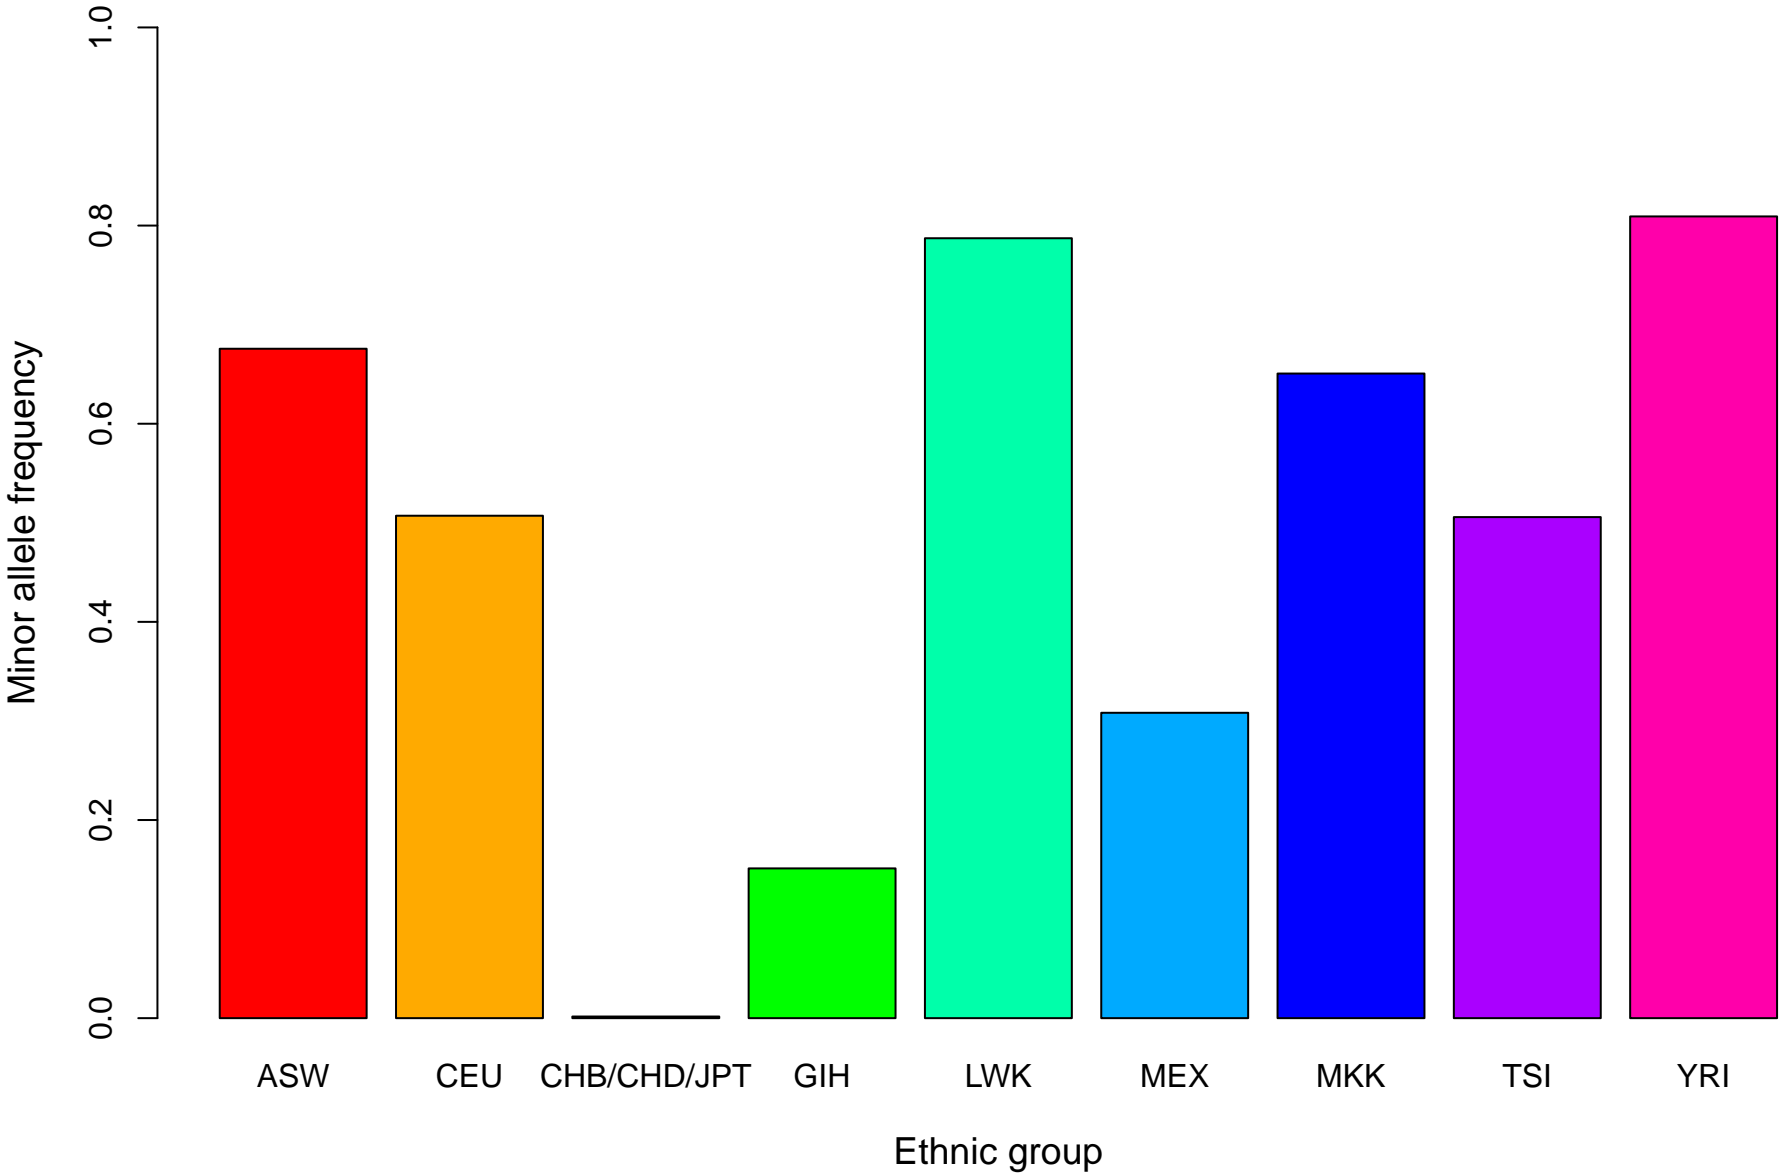

# rs2973930\_A

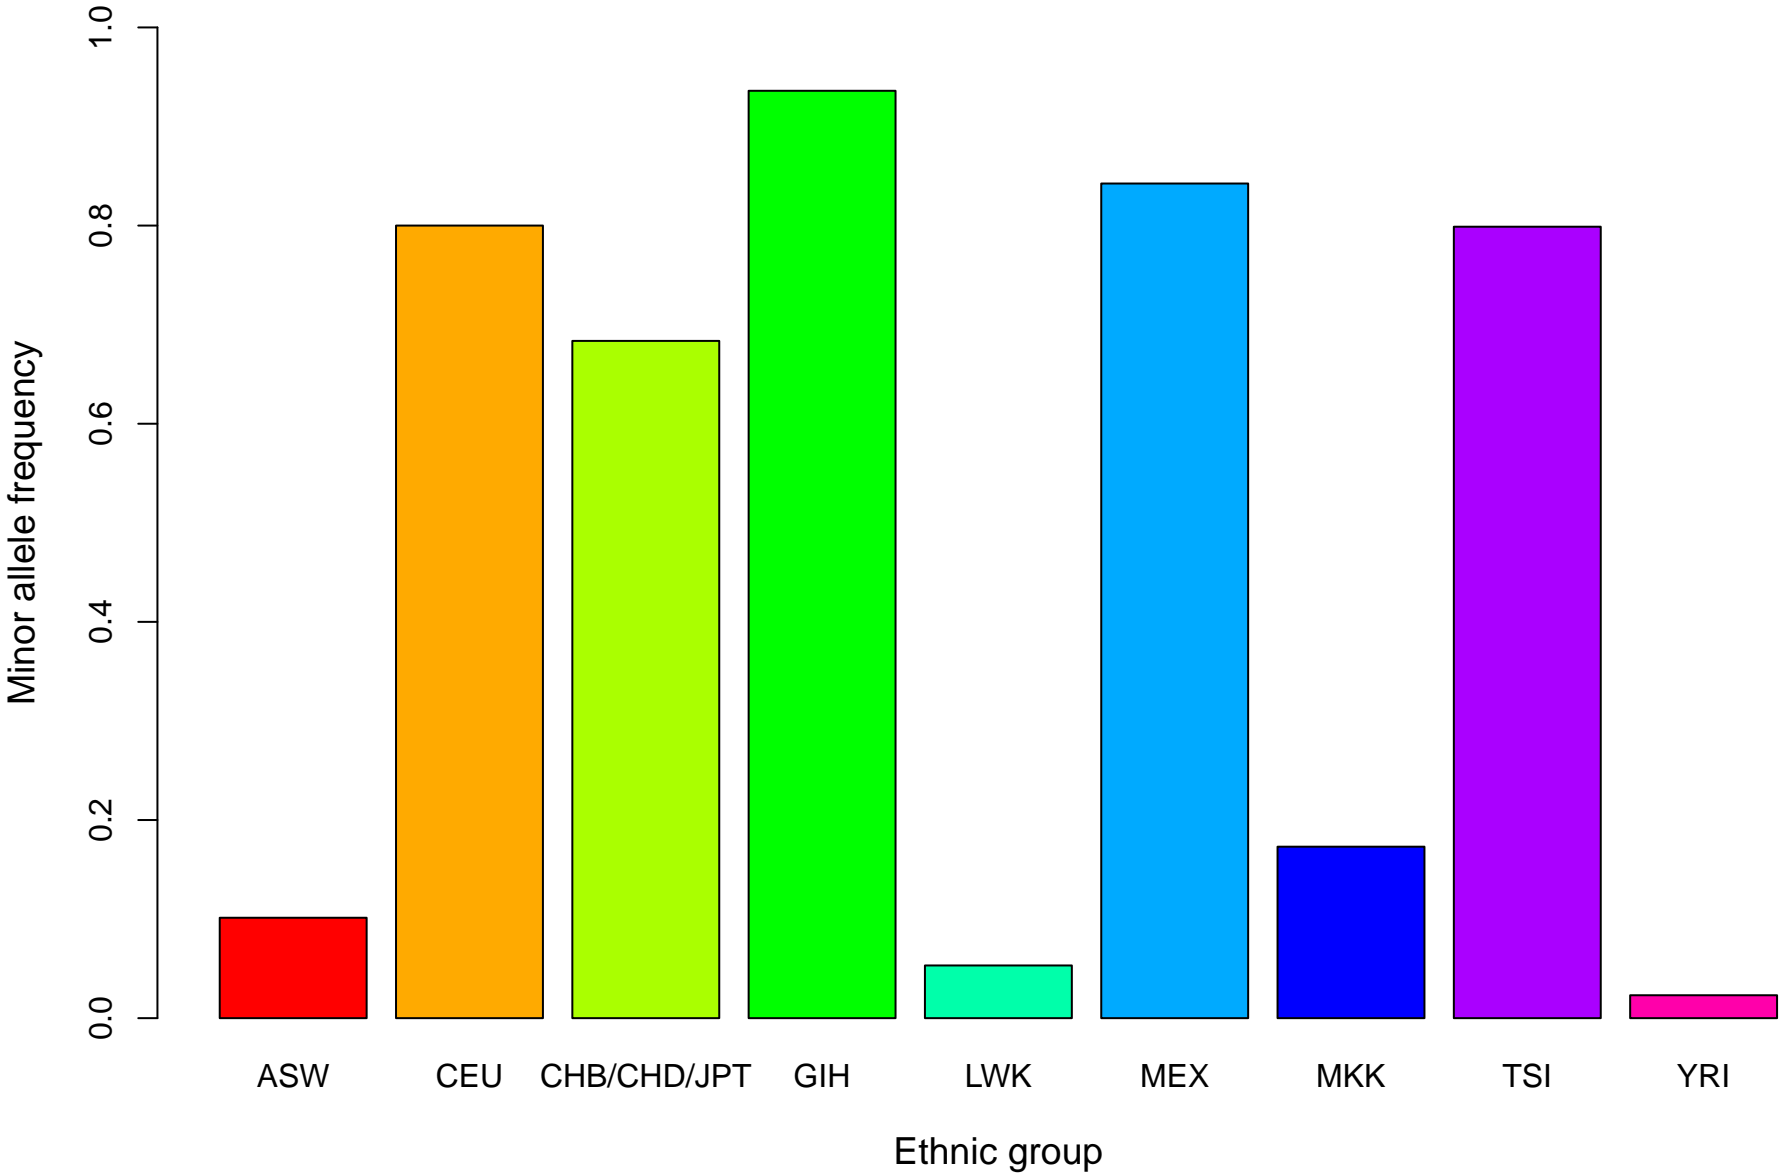



# rs9486069\_G

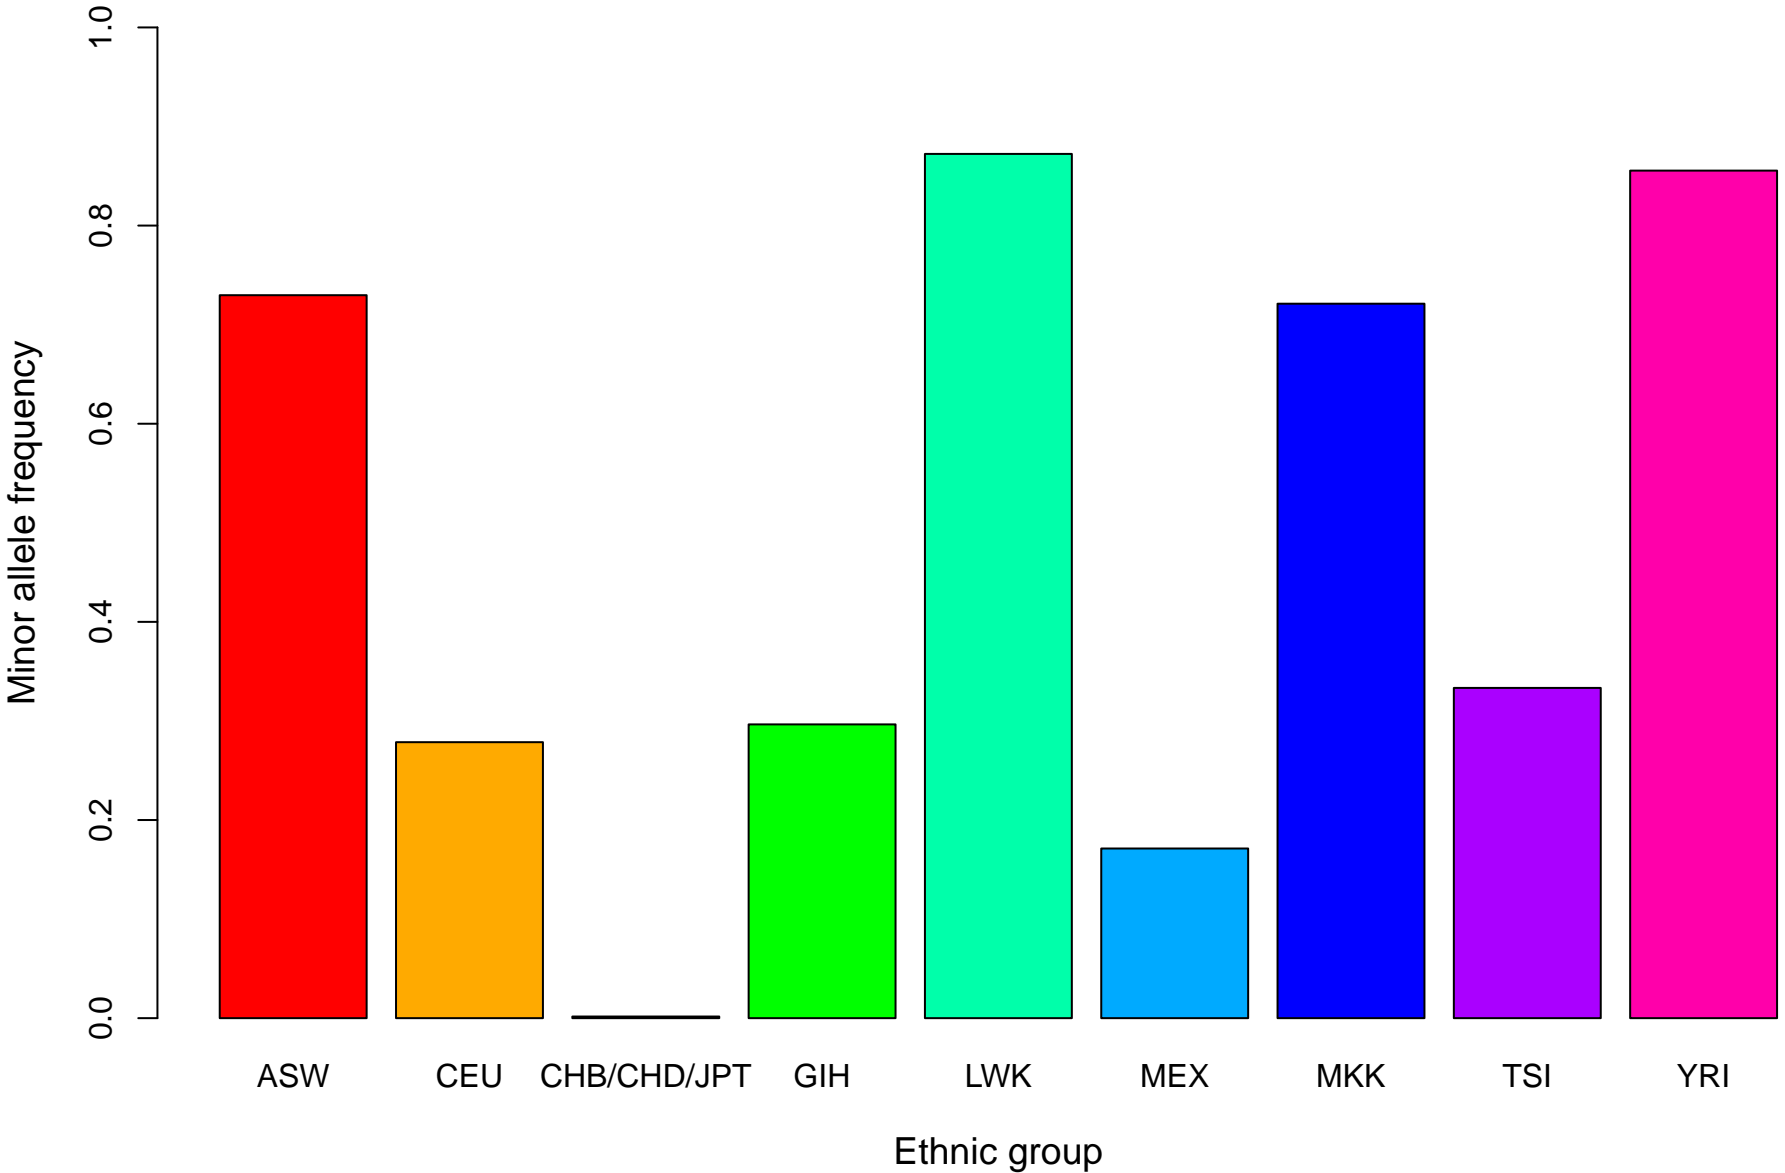

# rs1869237\_A

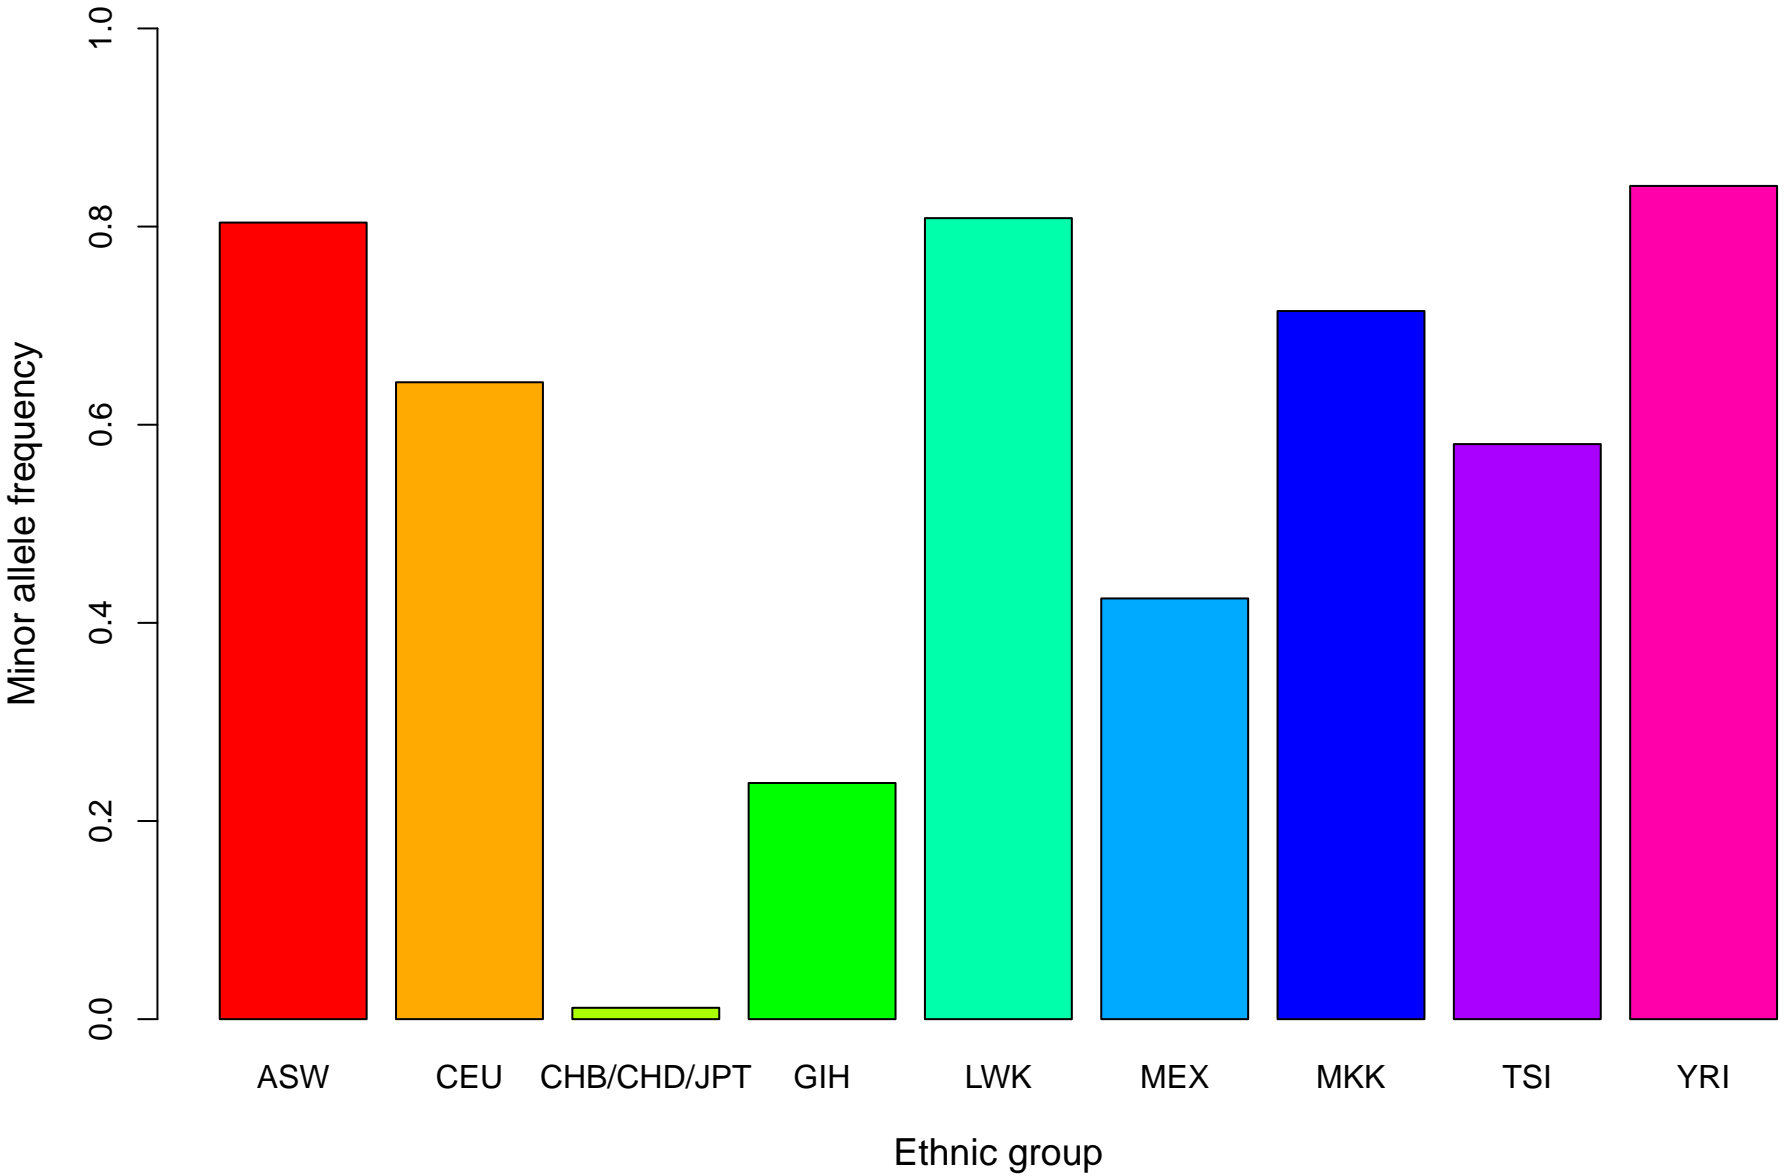

# rs10433709\_A



# rs11988372\_A

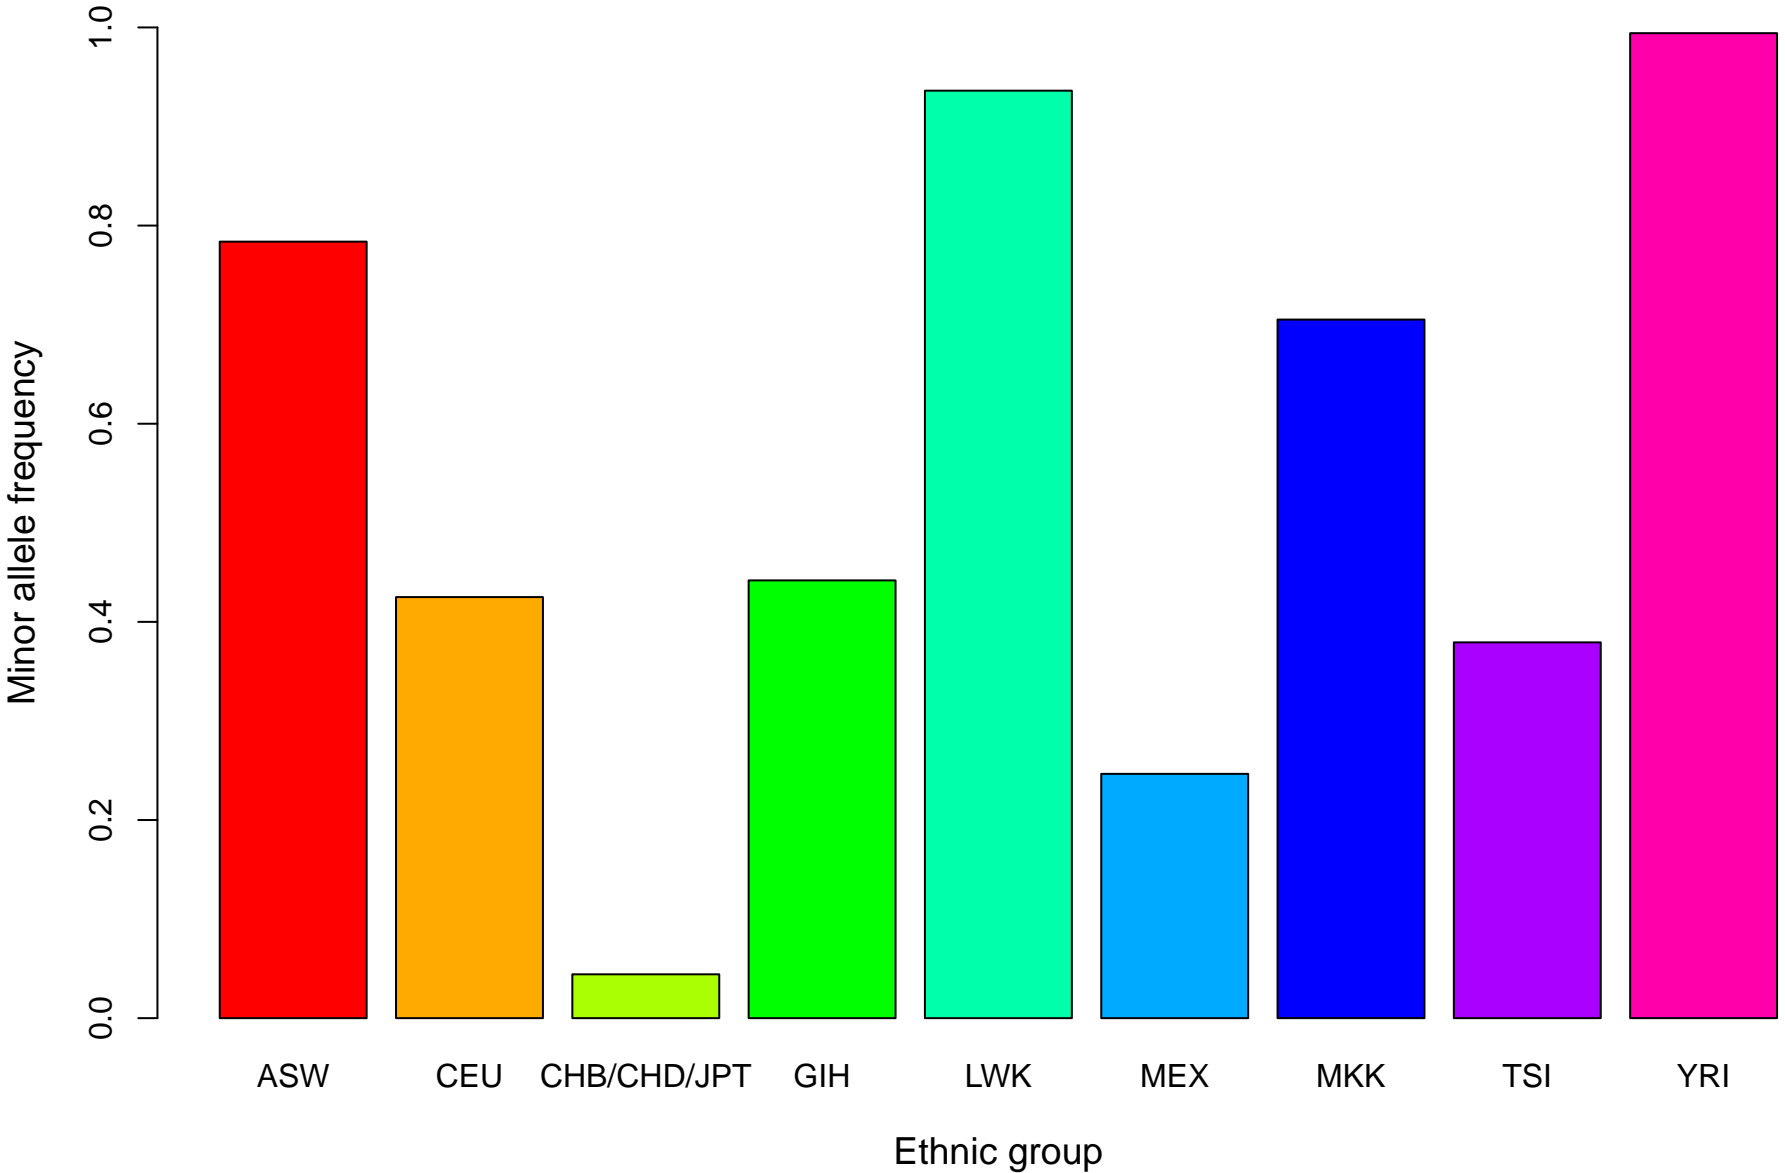

# rs3861455\_A

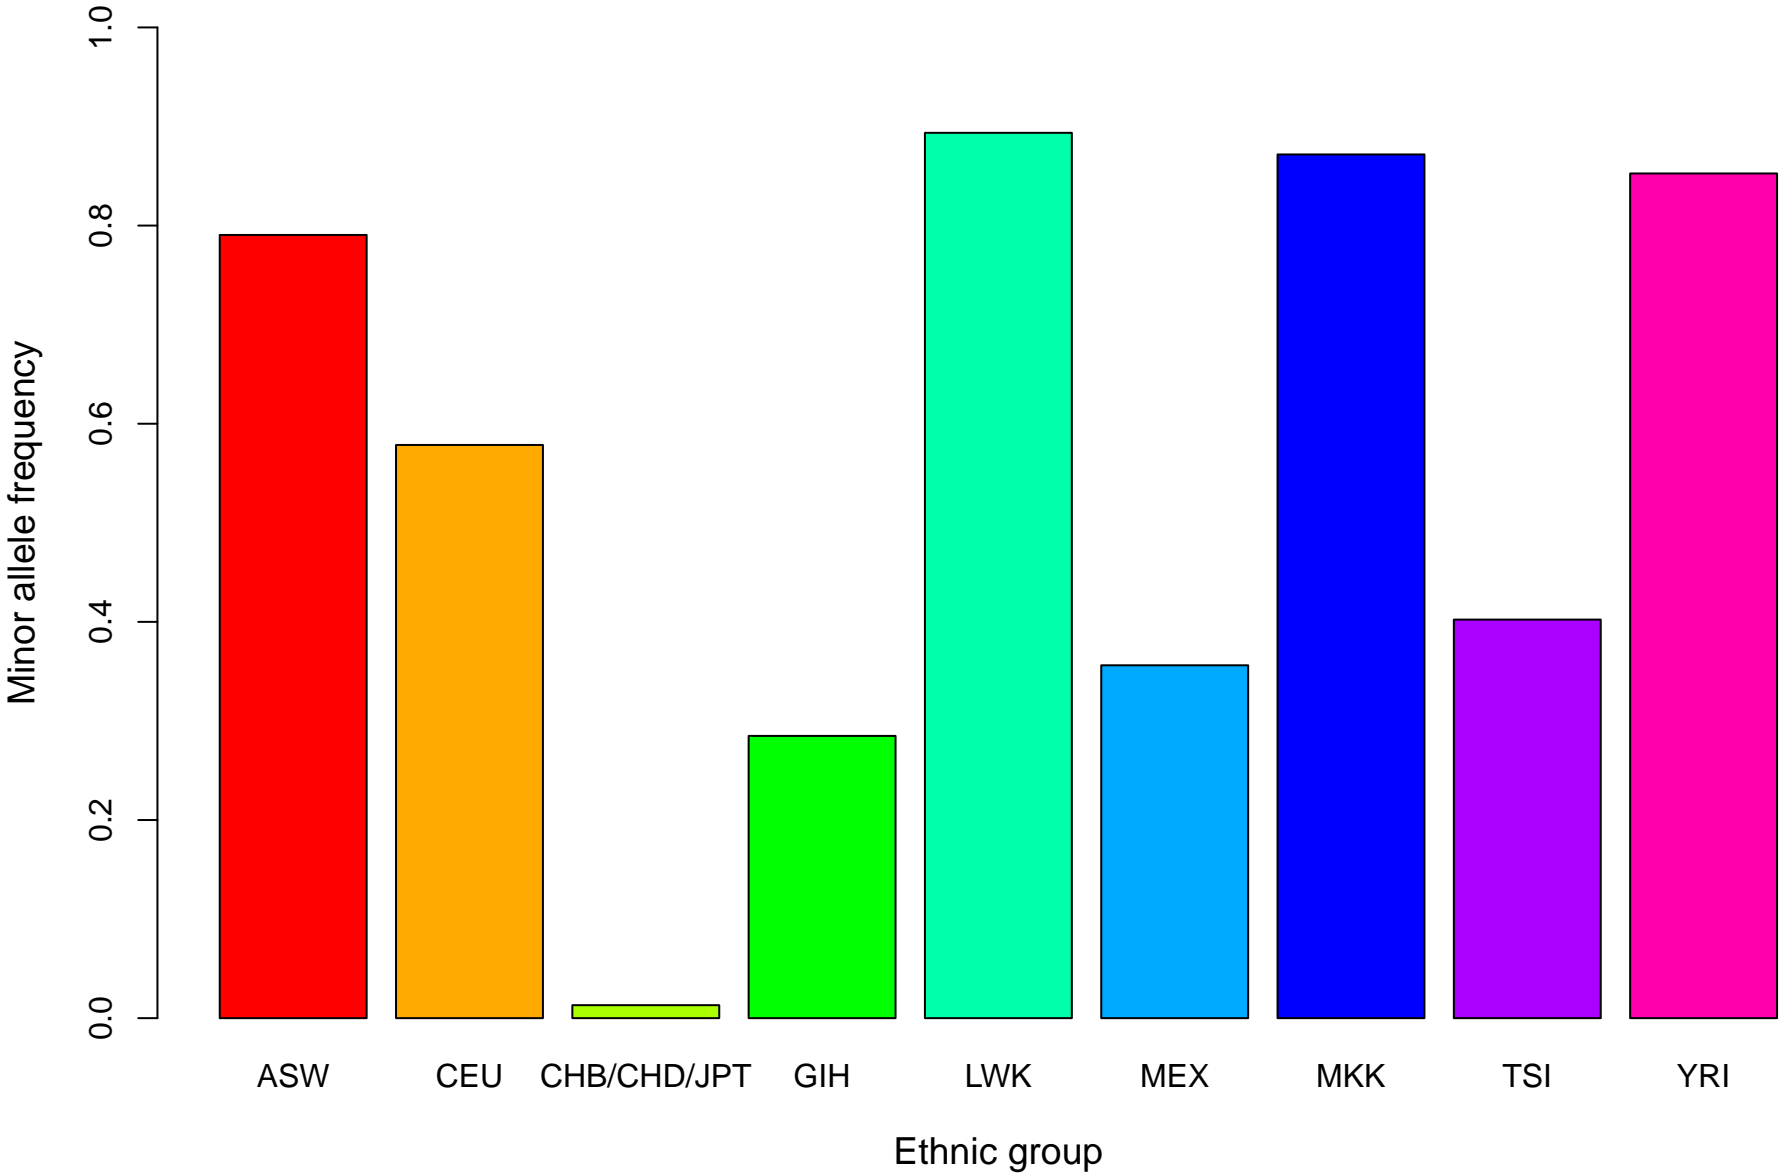

# rs6503977\_T

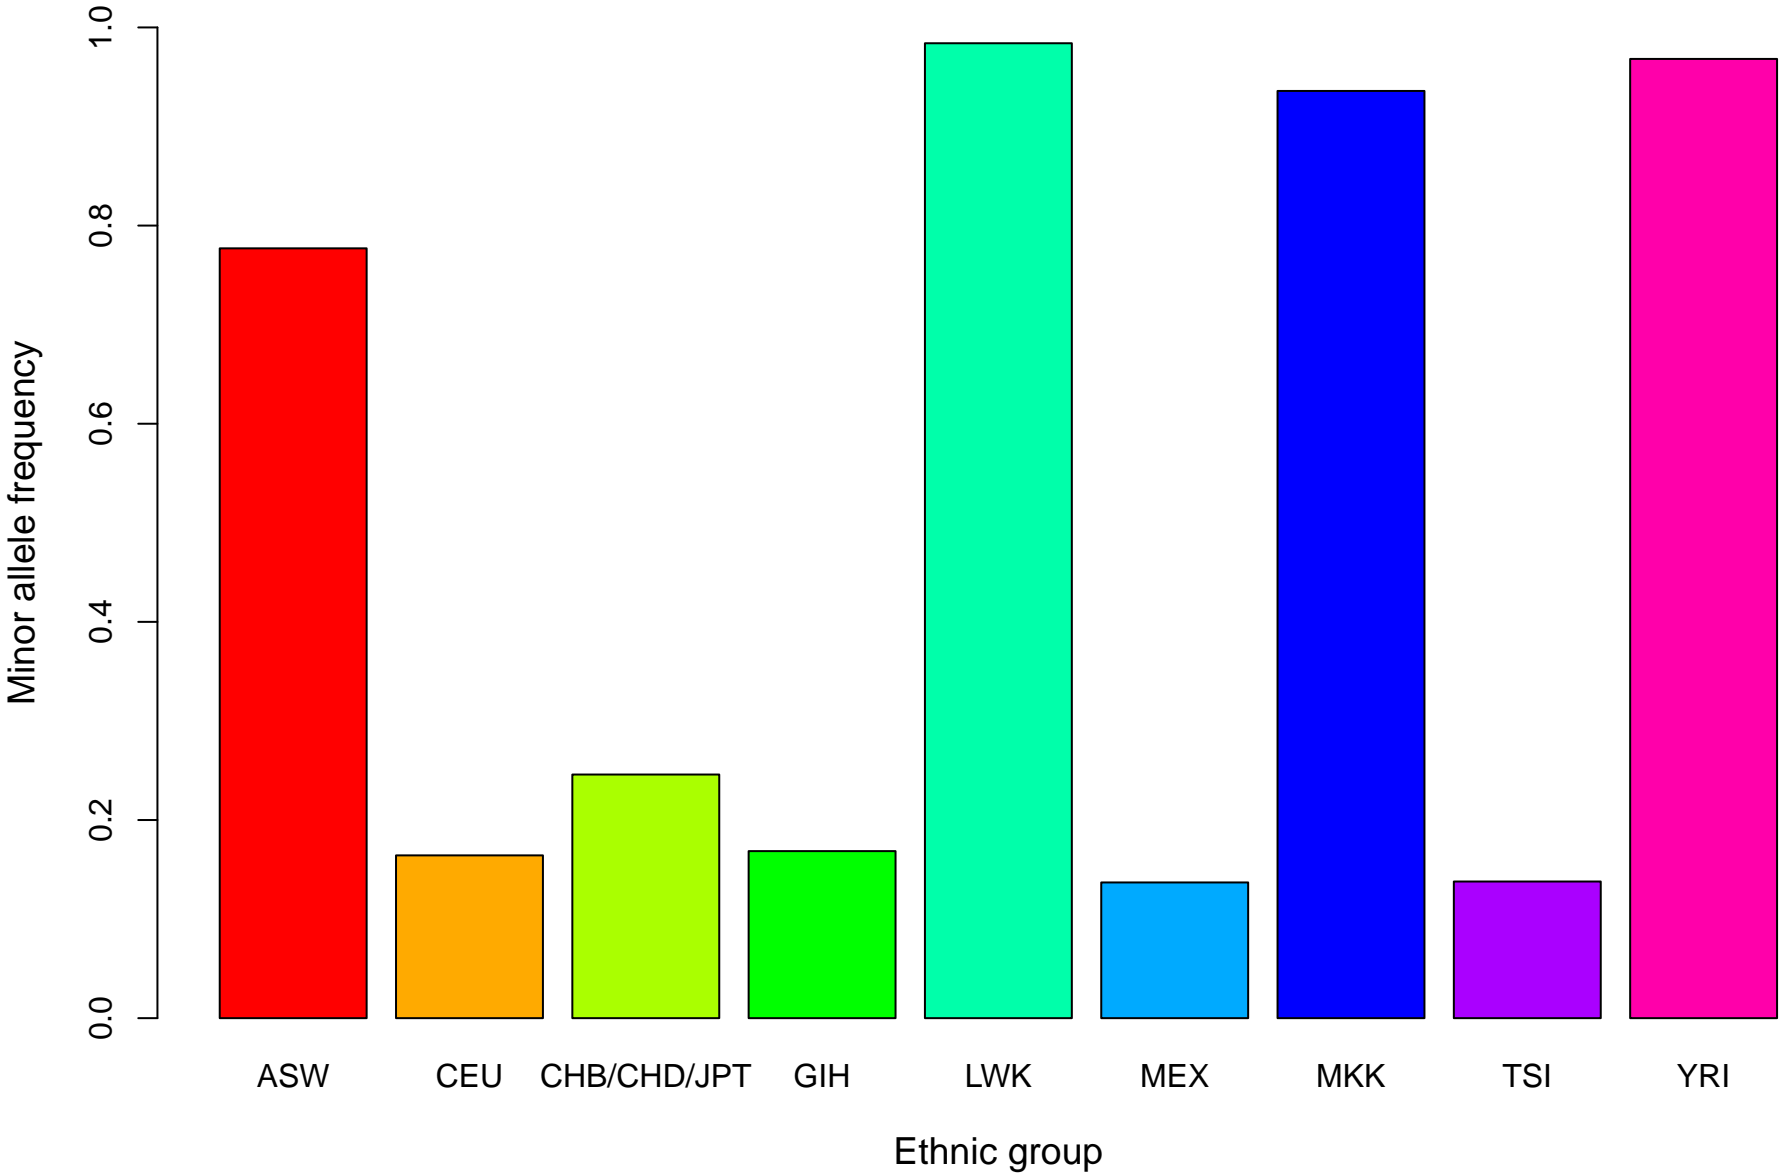

# rs12637723\_G

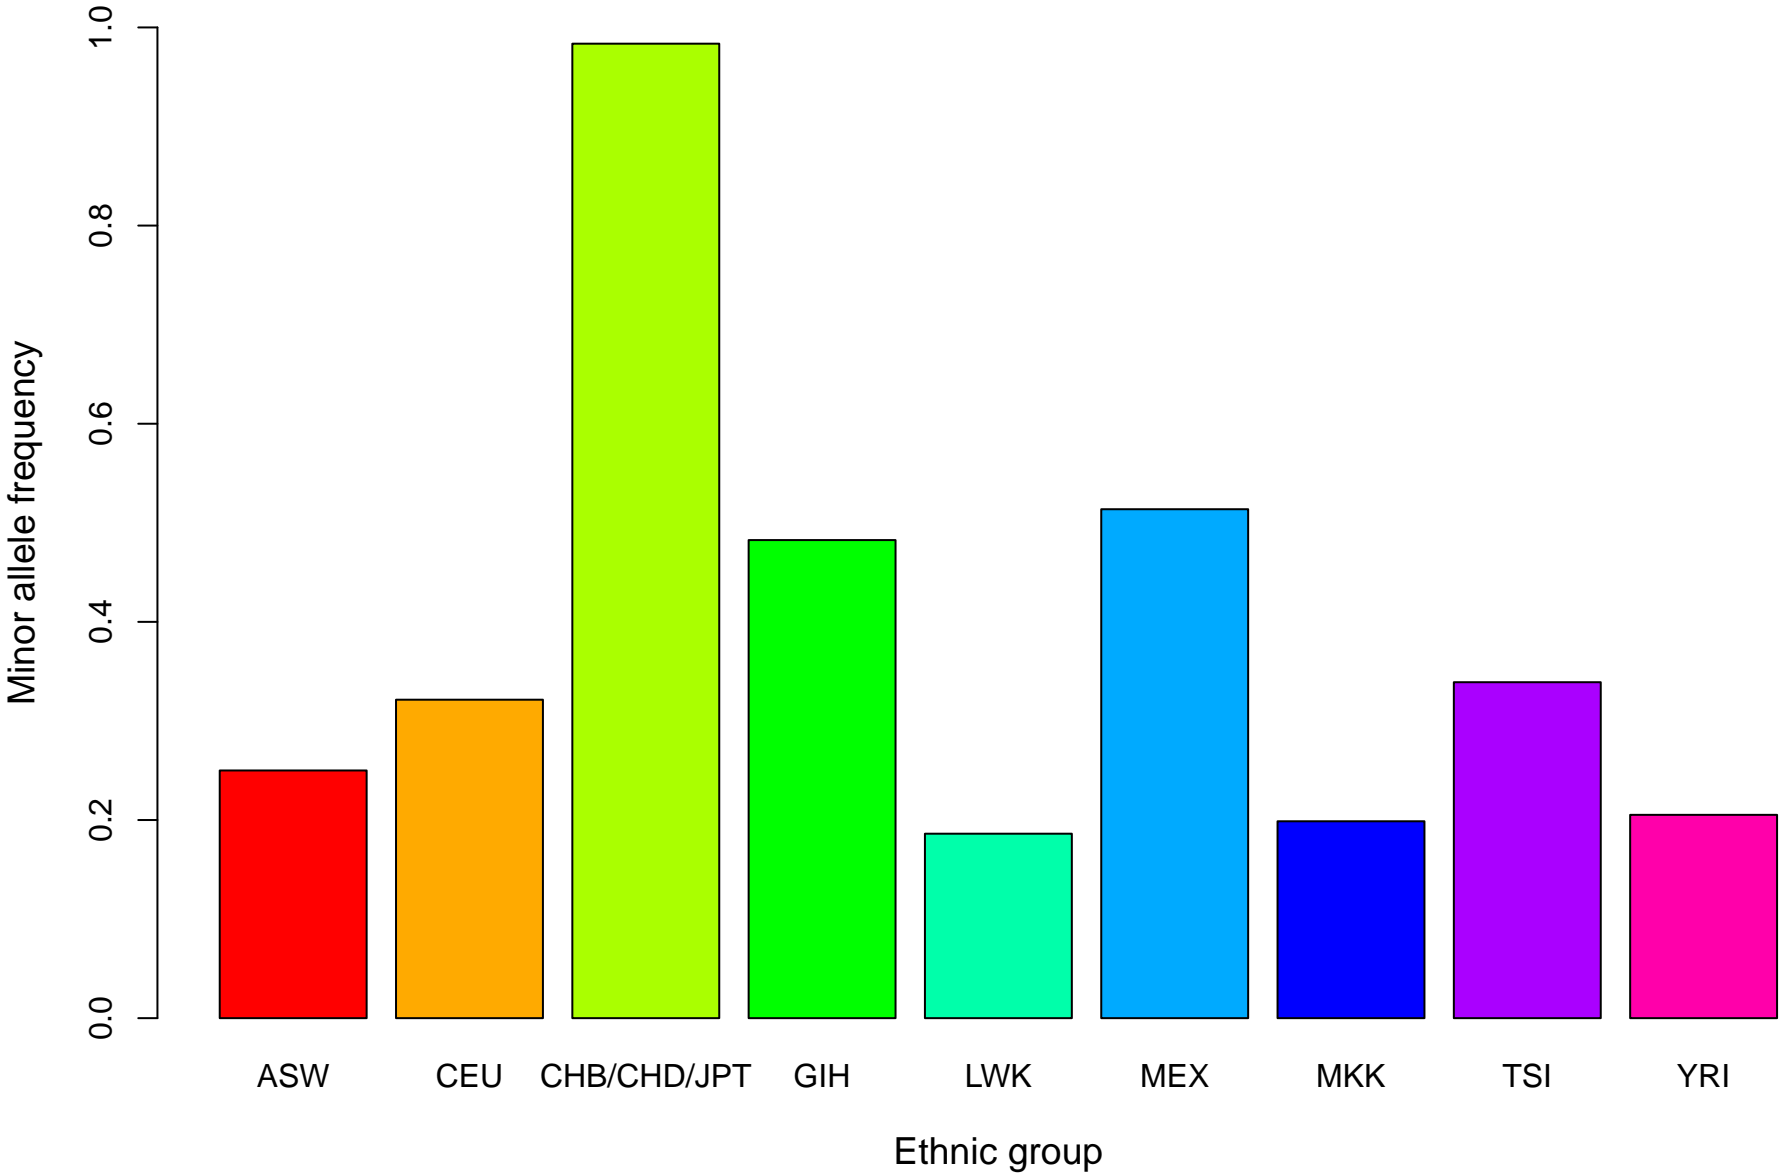

# rs1408928\_C

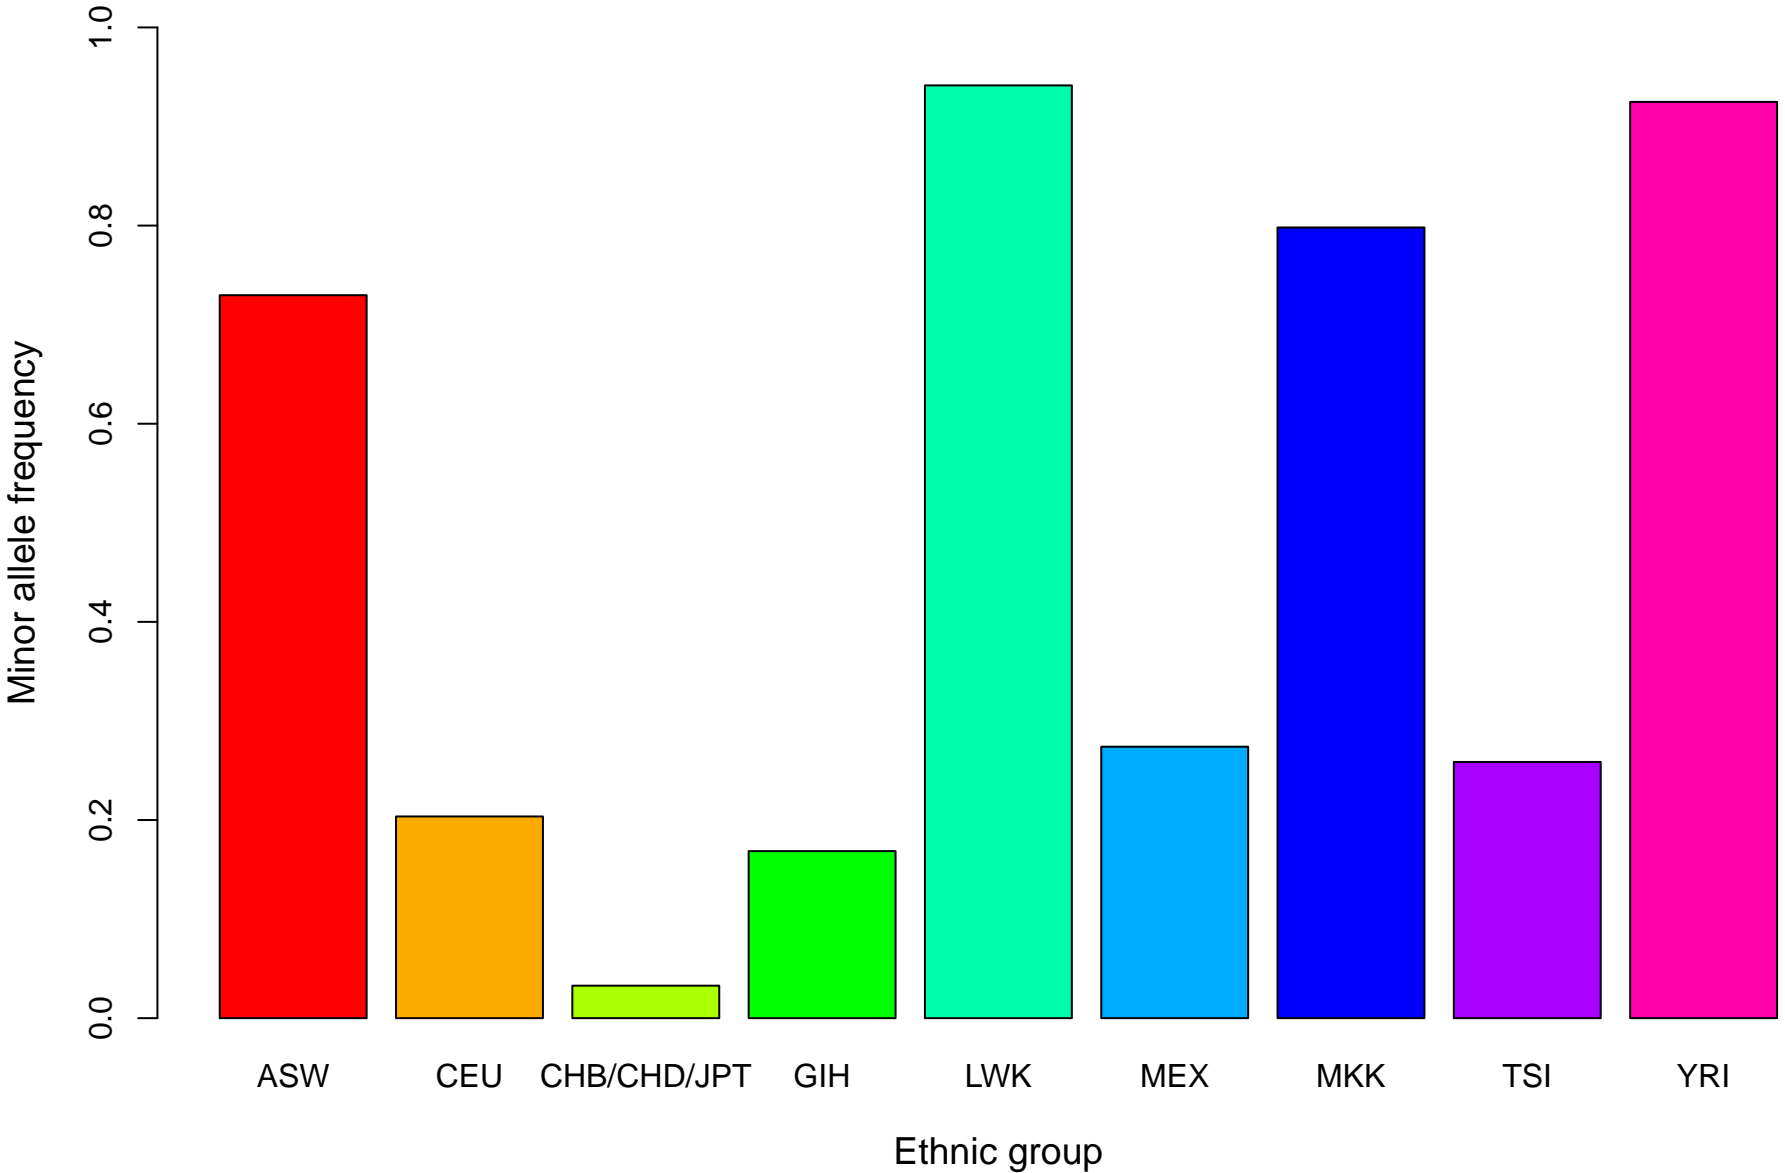



# rs4834142\_G

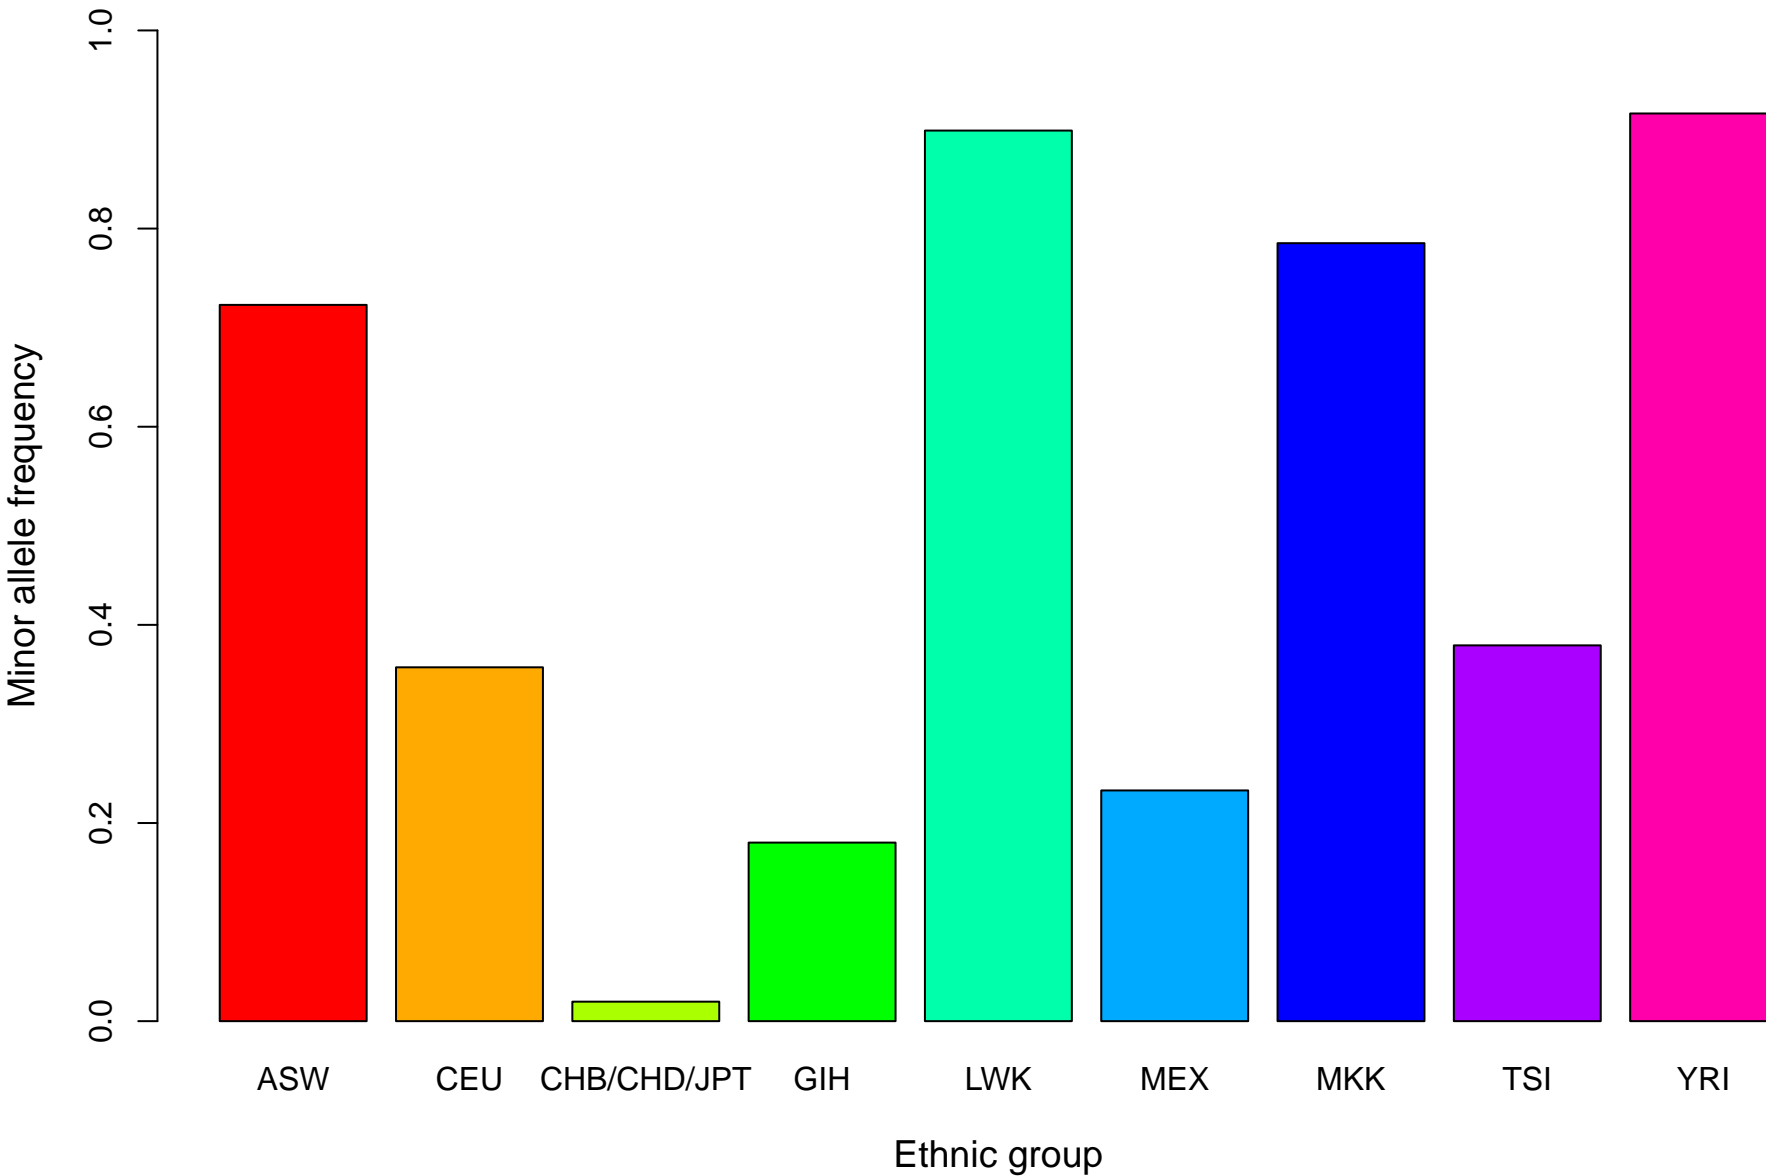

# rs732381\_T

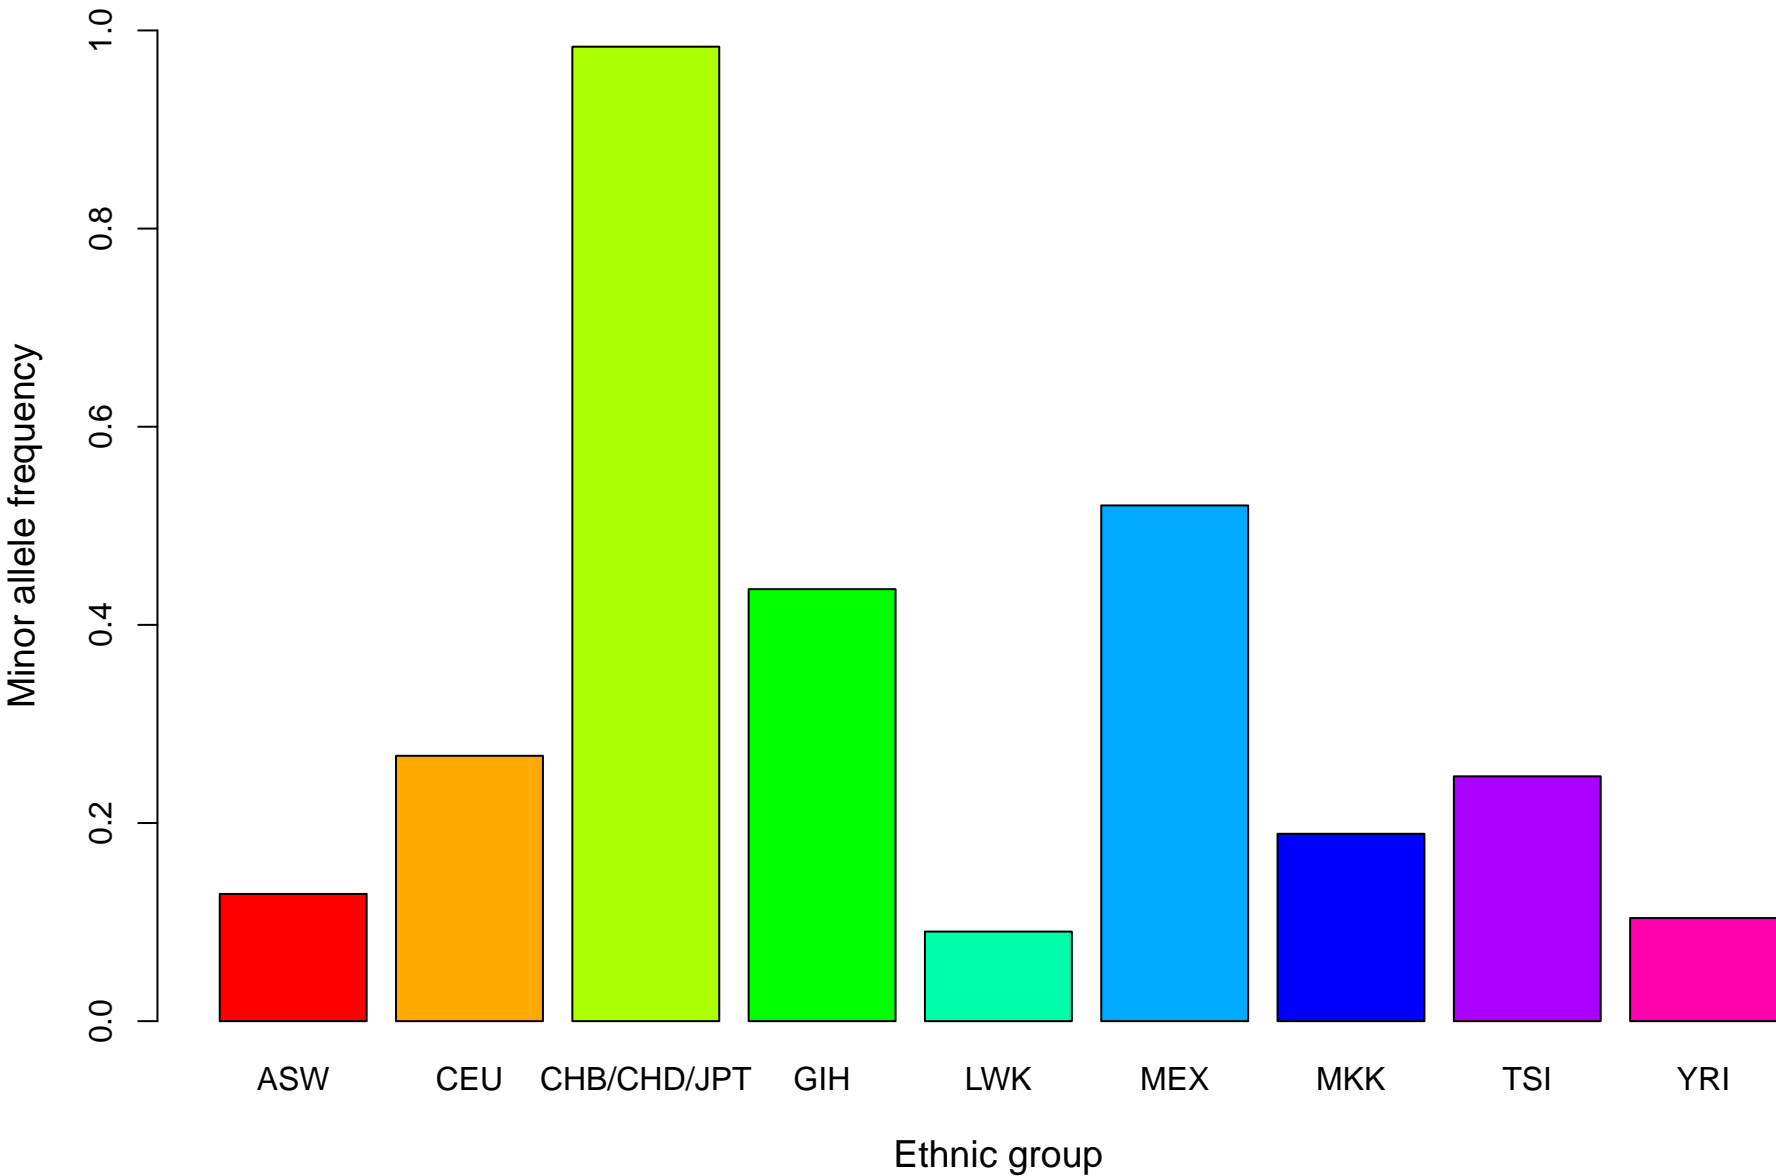

# rs2639297\_T

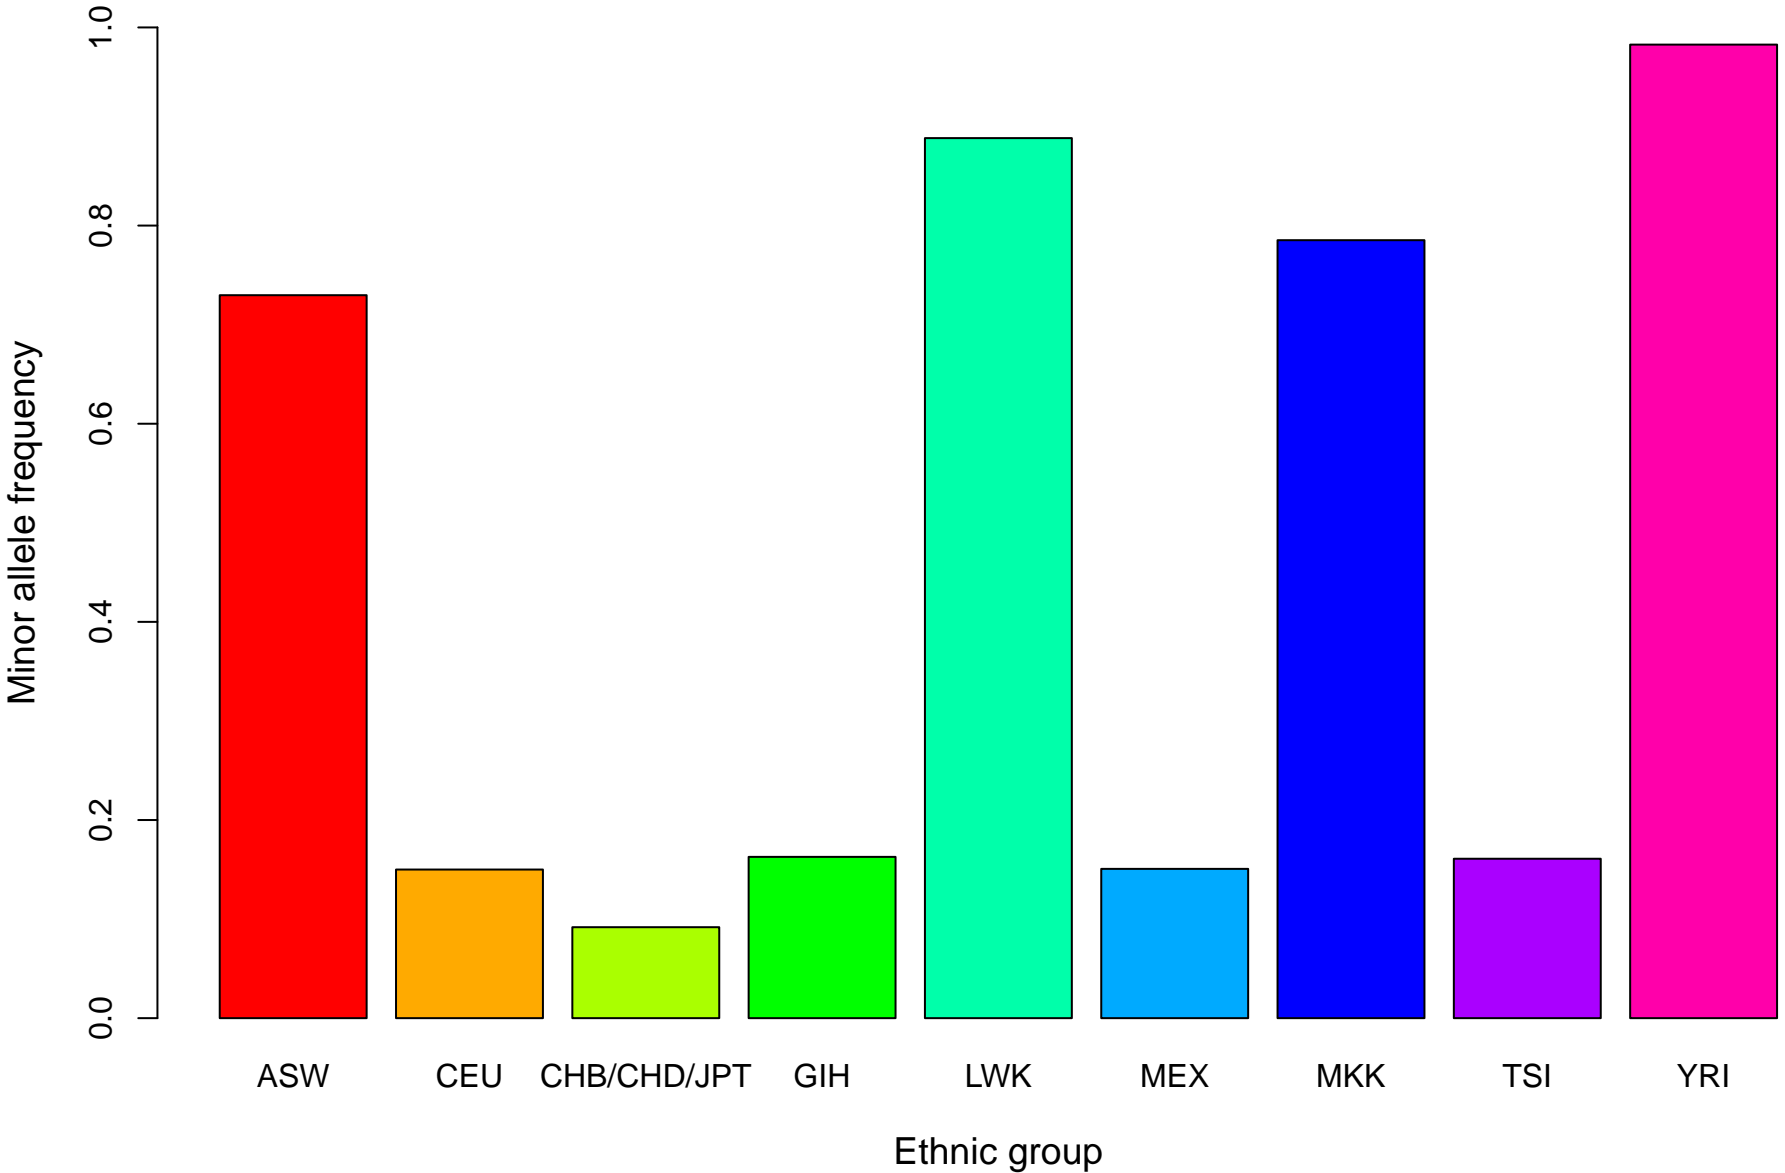

# rs9576028\_G

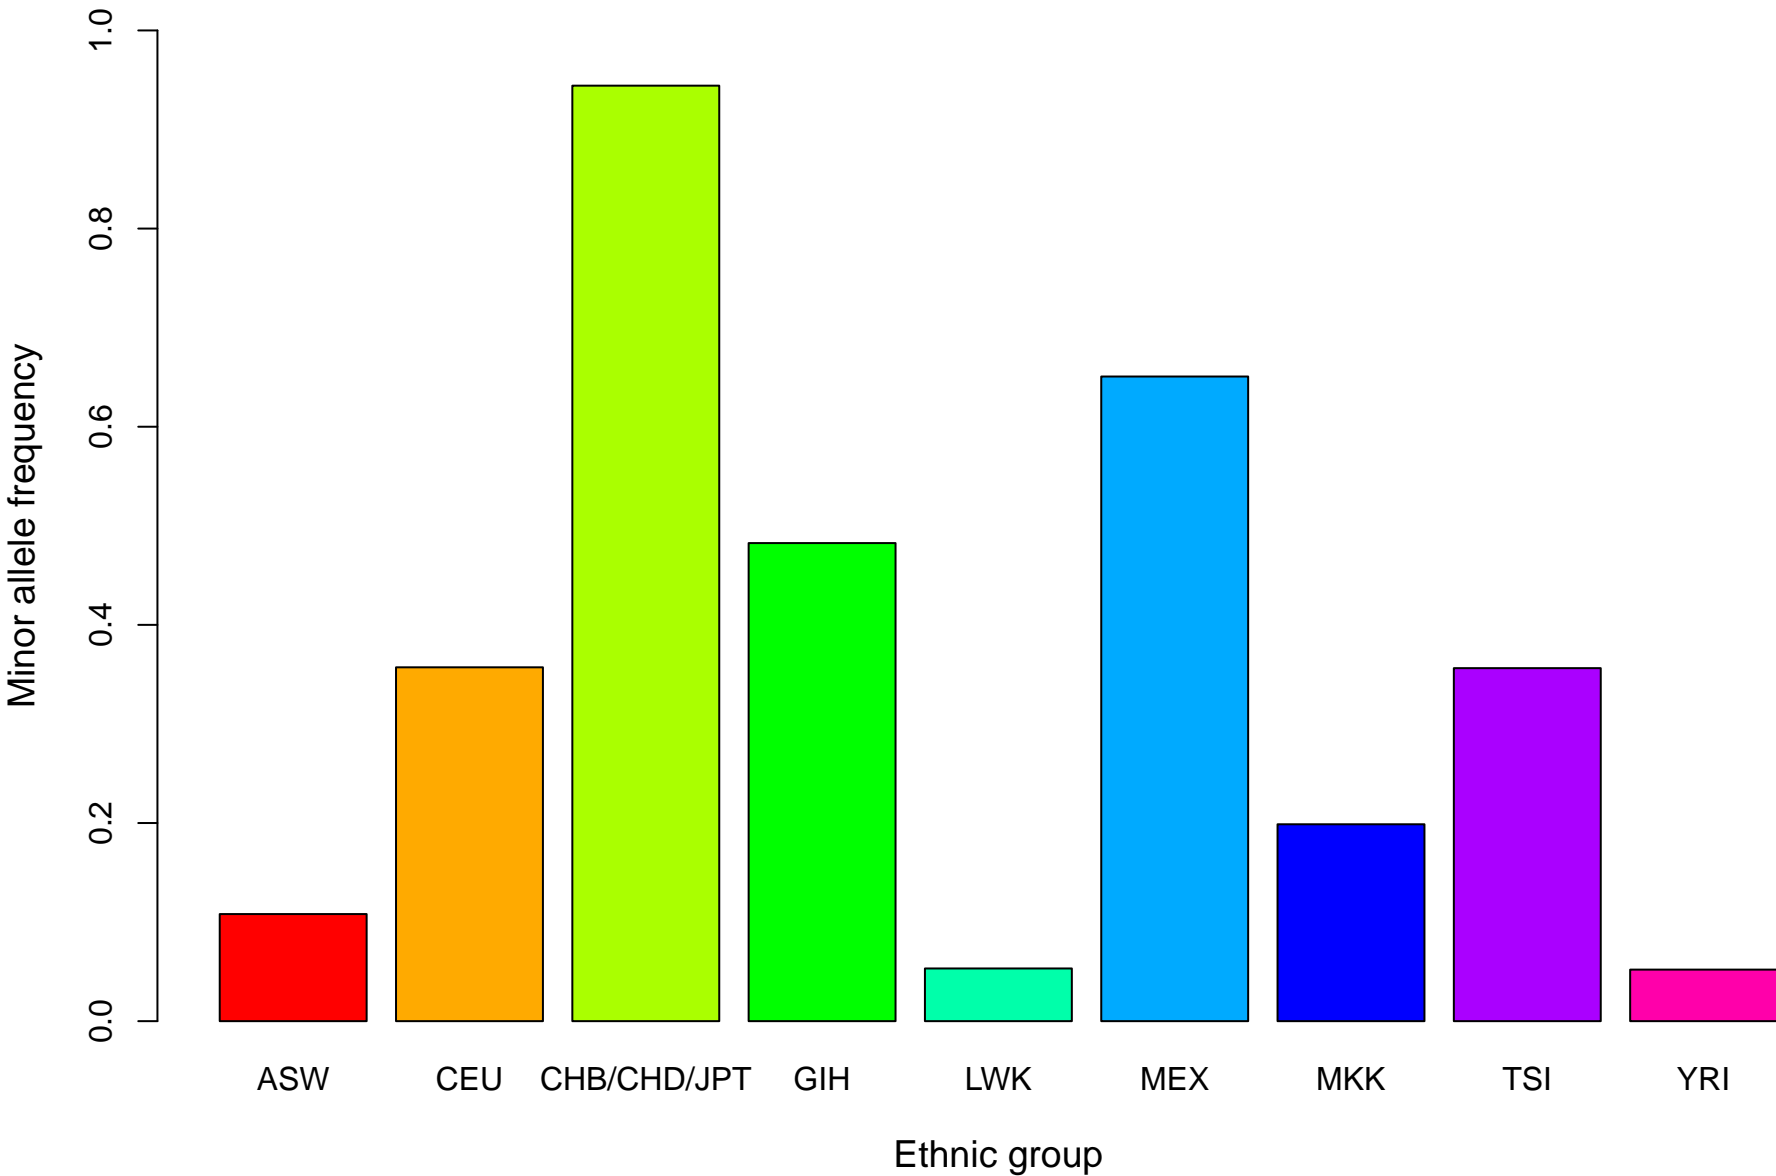

# rs221309\_G

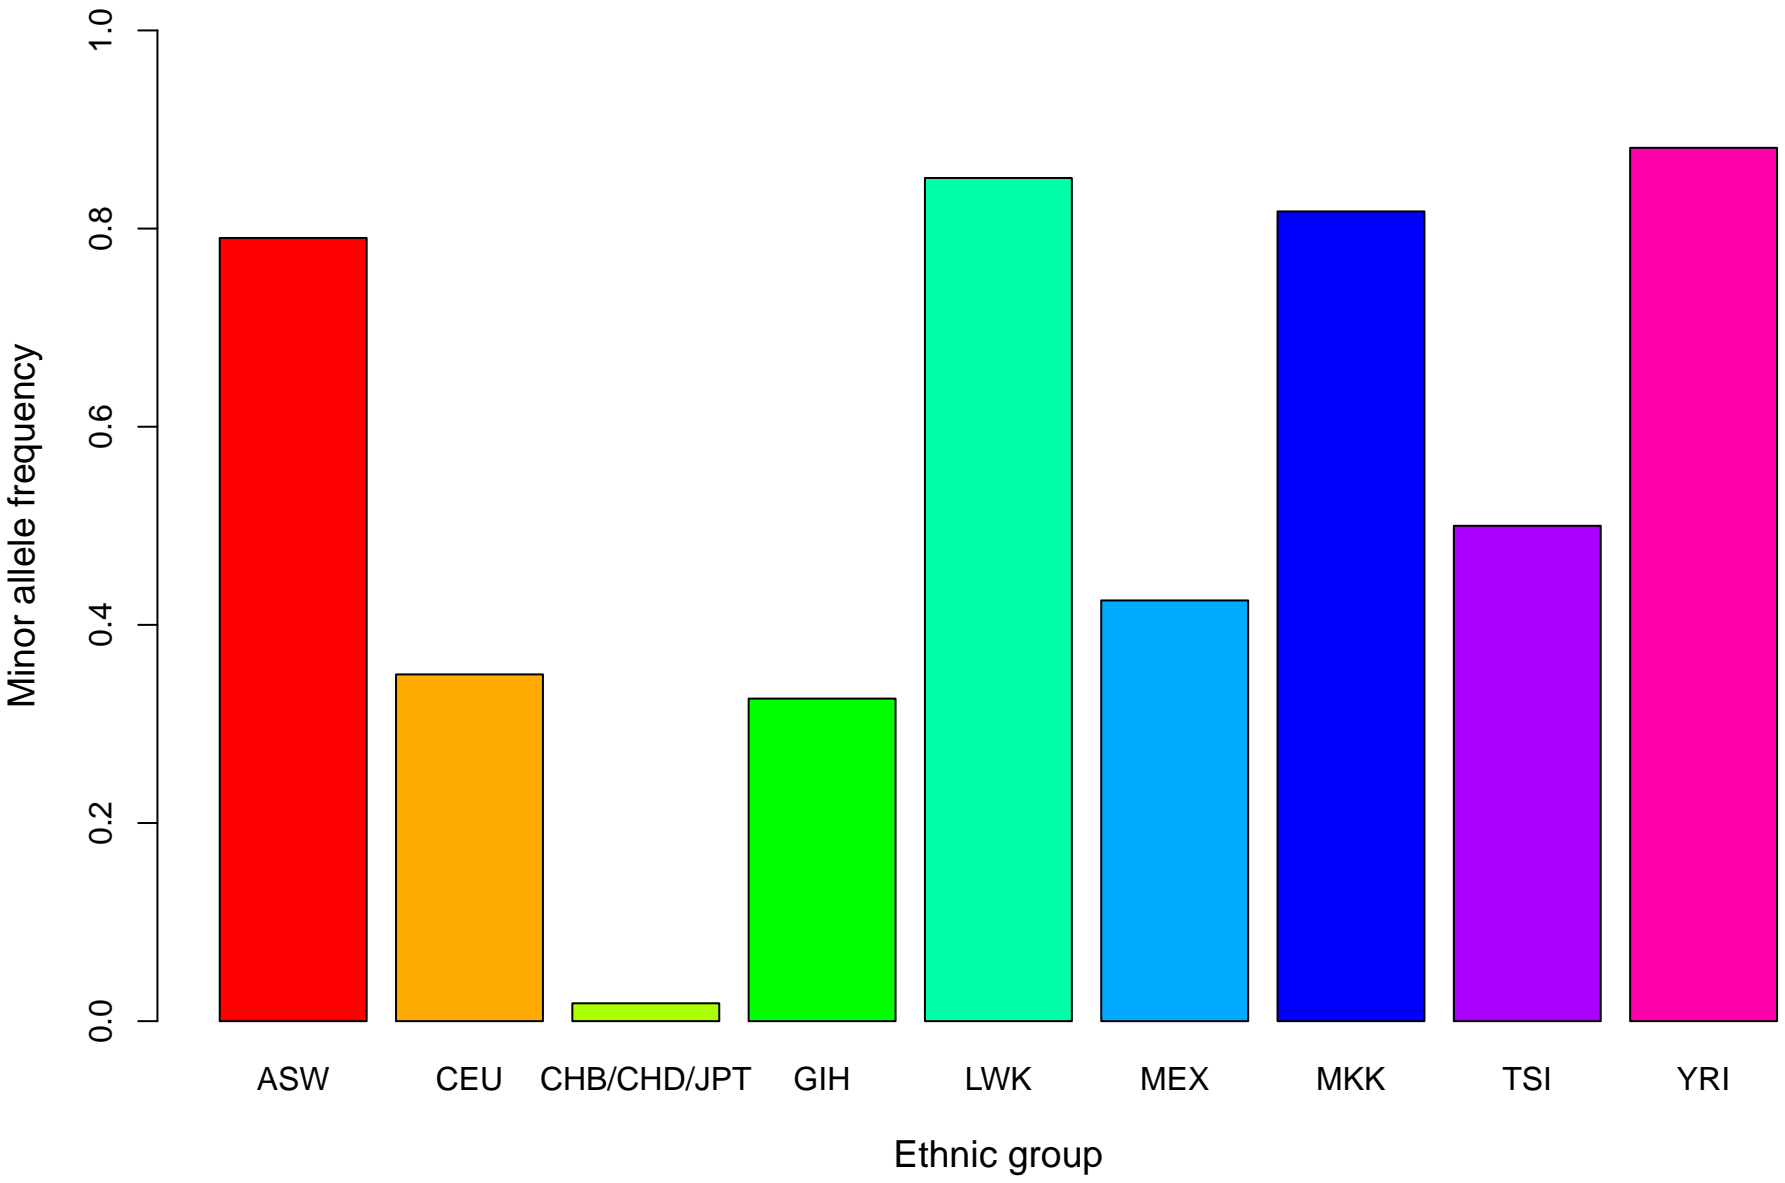

# rs9410301\_T

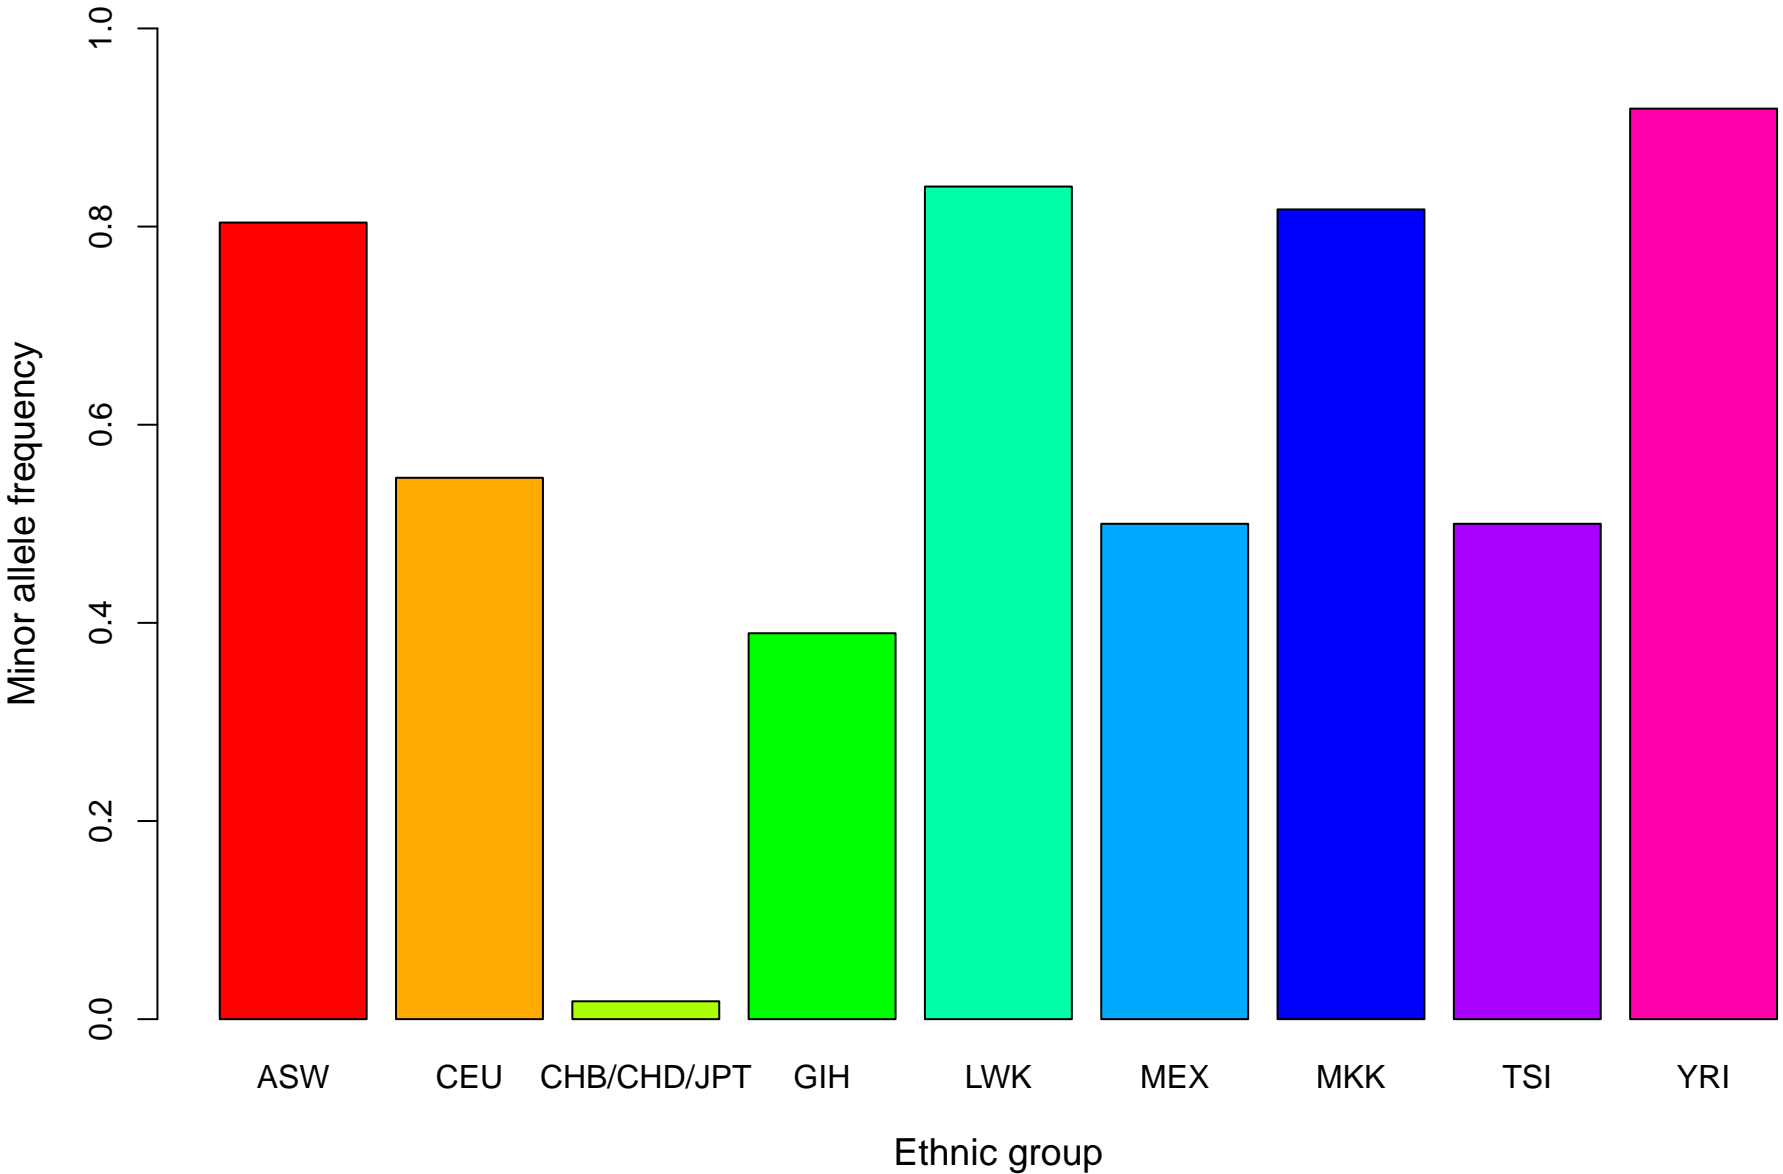

# rs7007063\_A

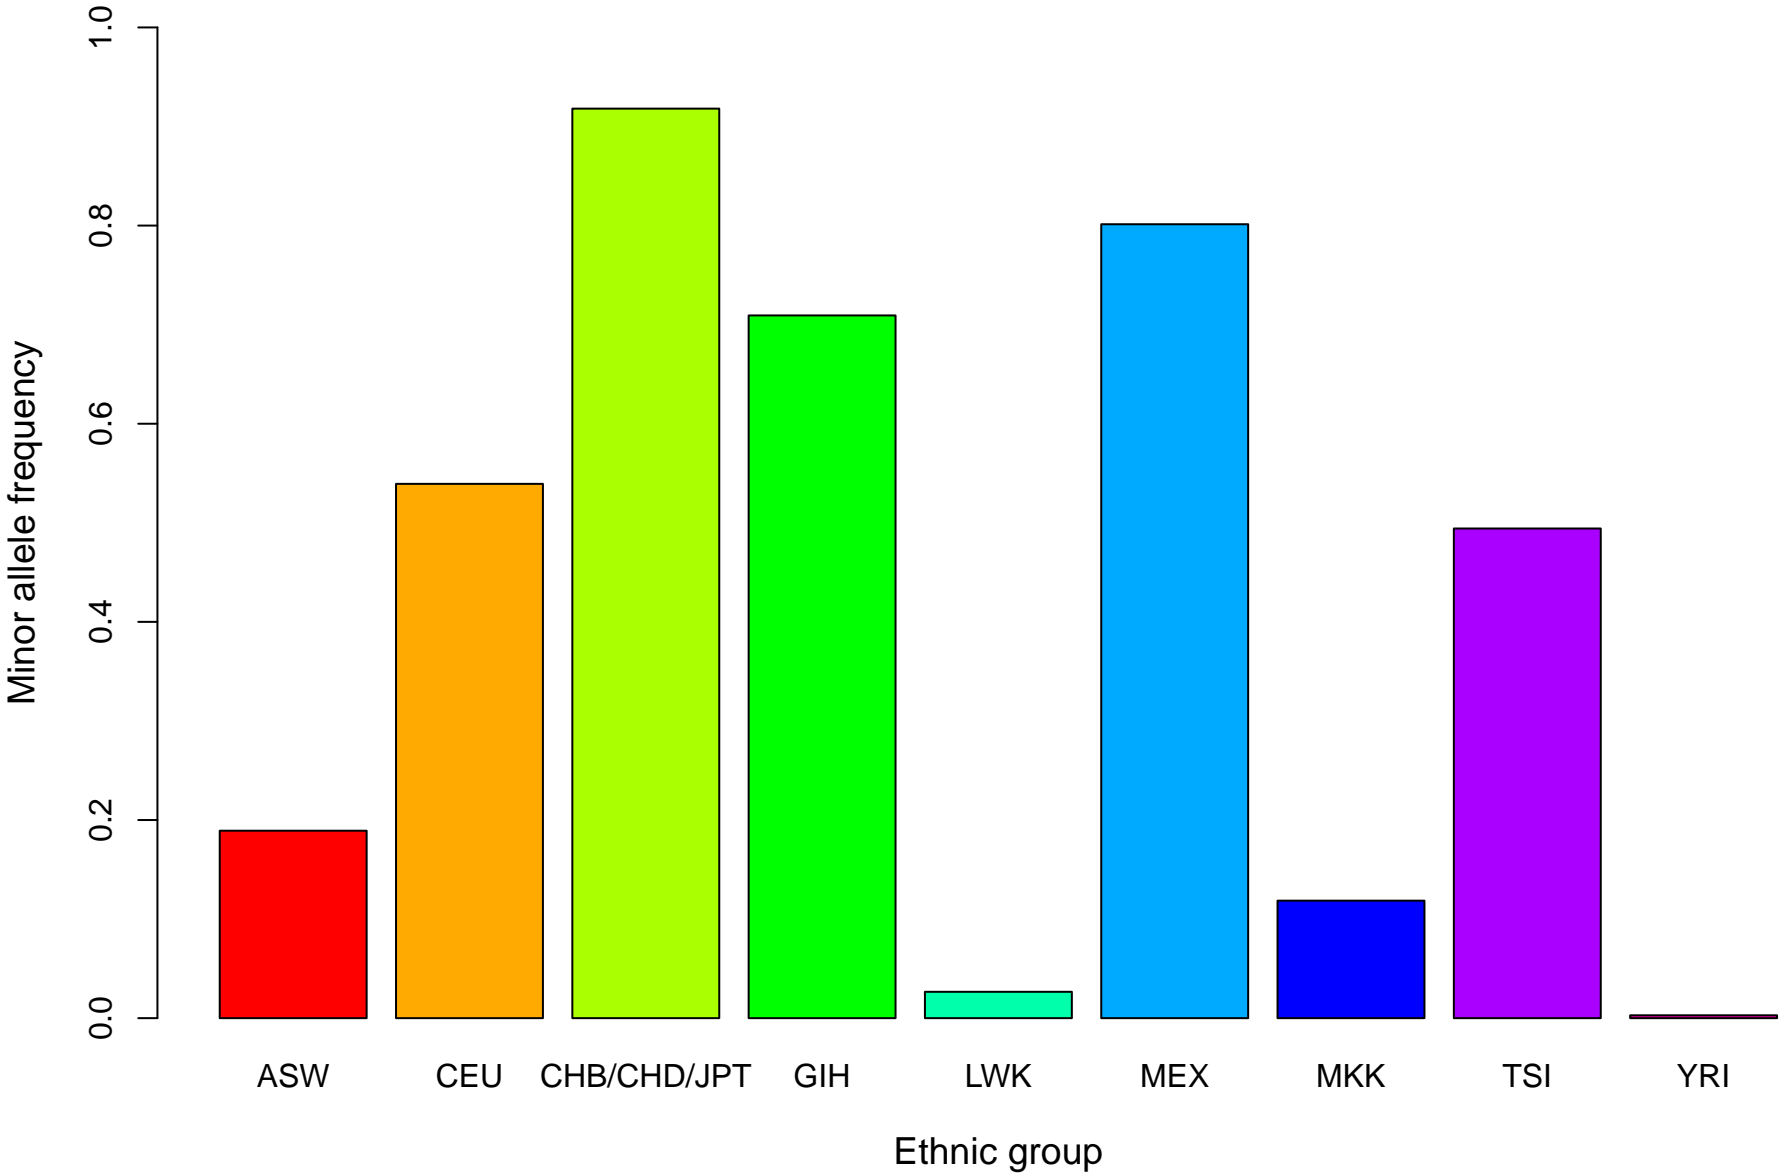

# rs773360\_C

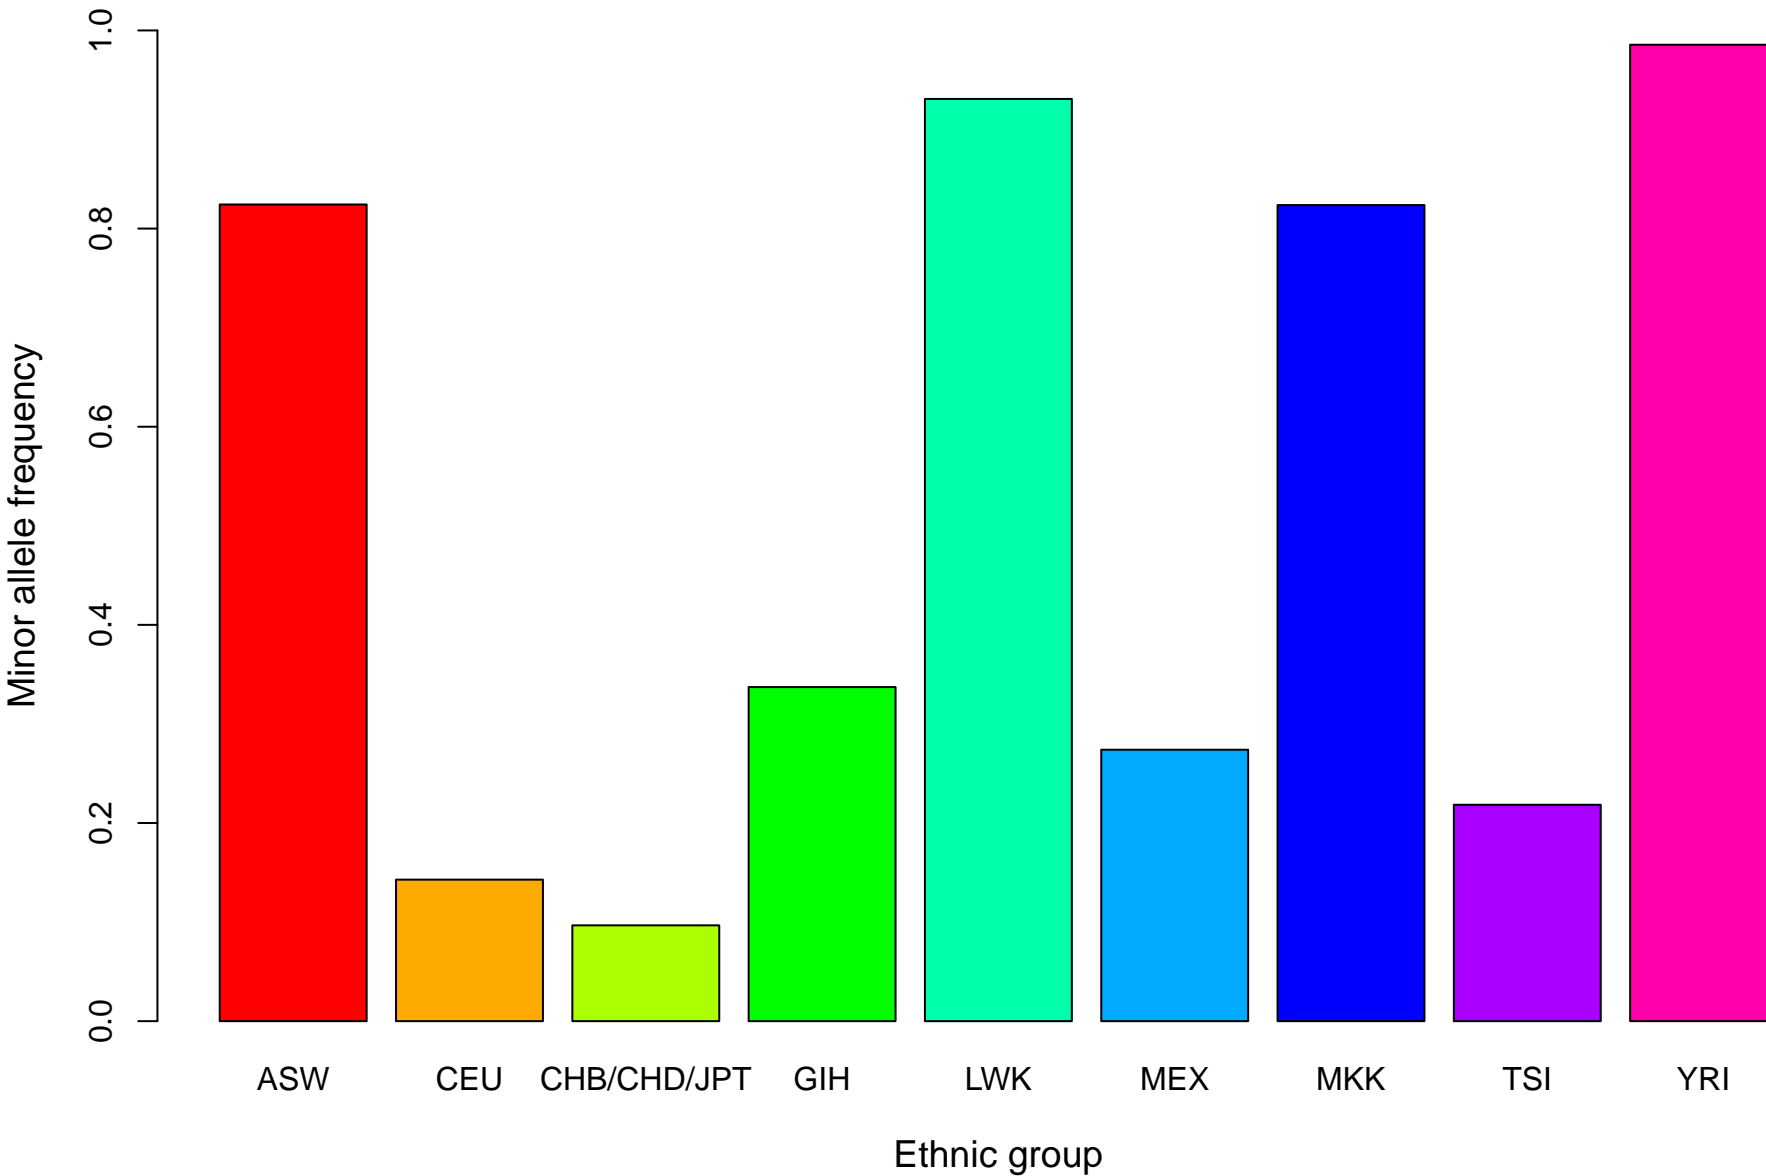



# rs762960\_C

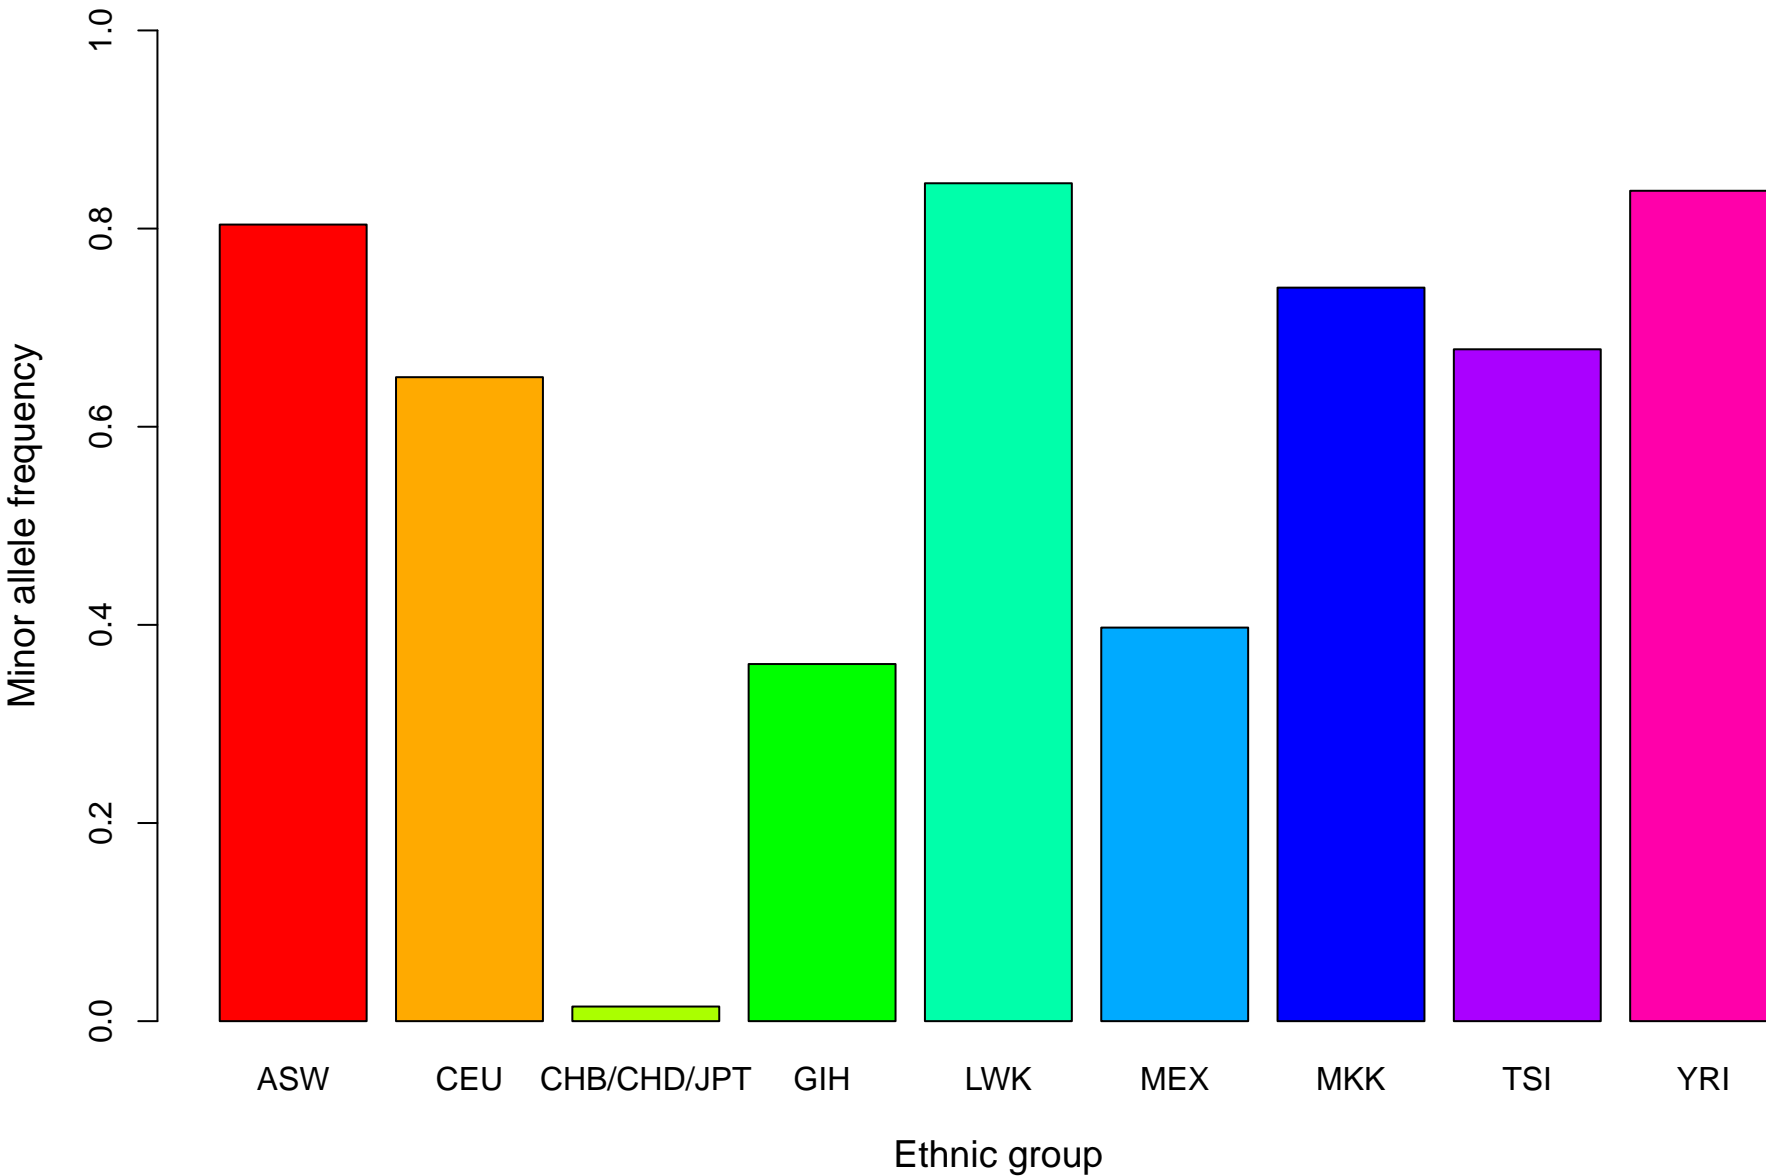

# rs13120844\_G

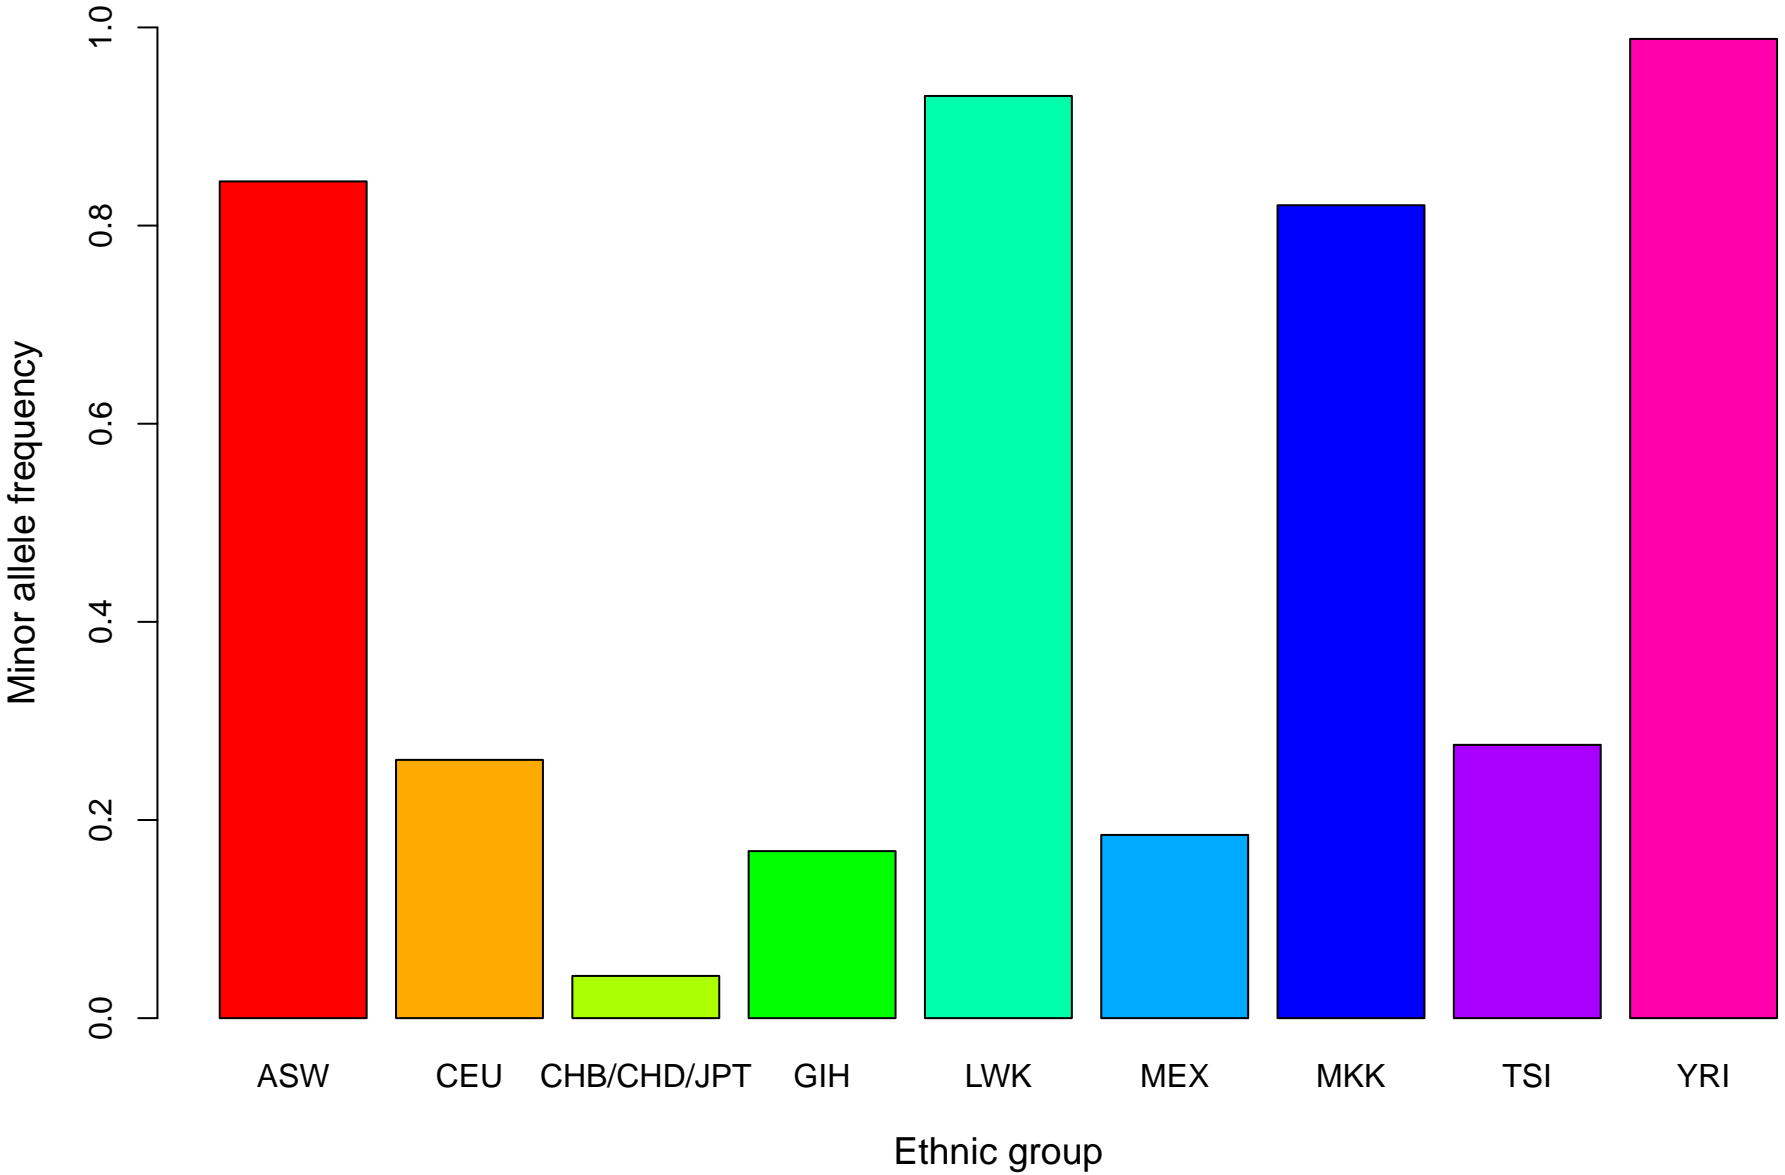

# rs2642966\_C

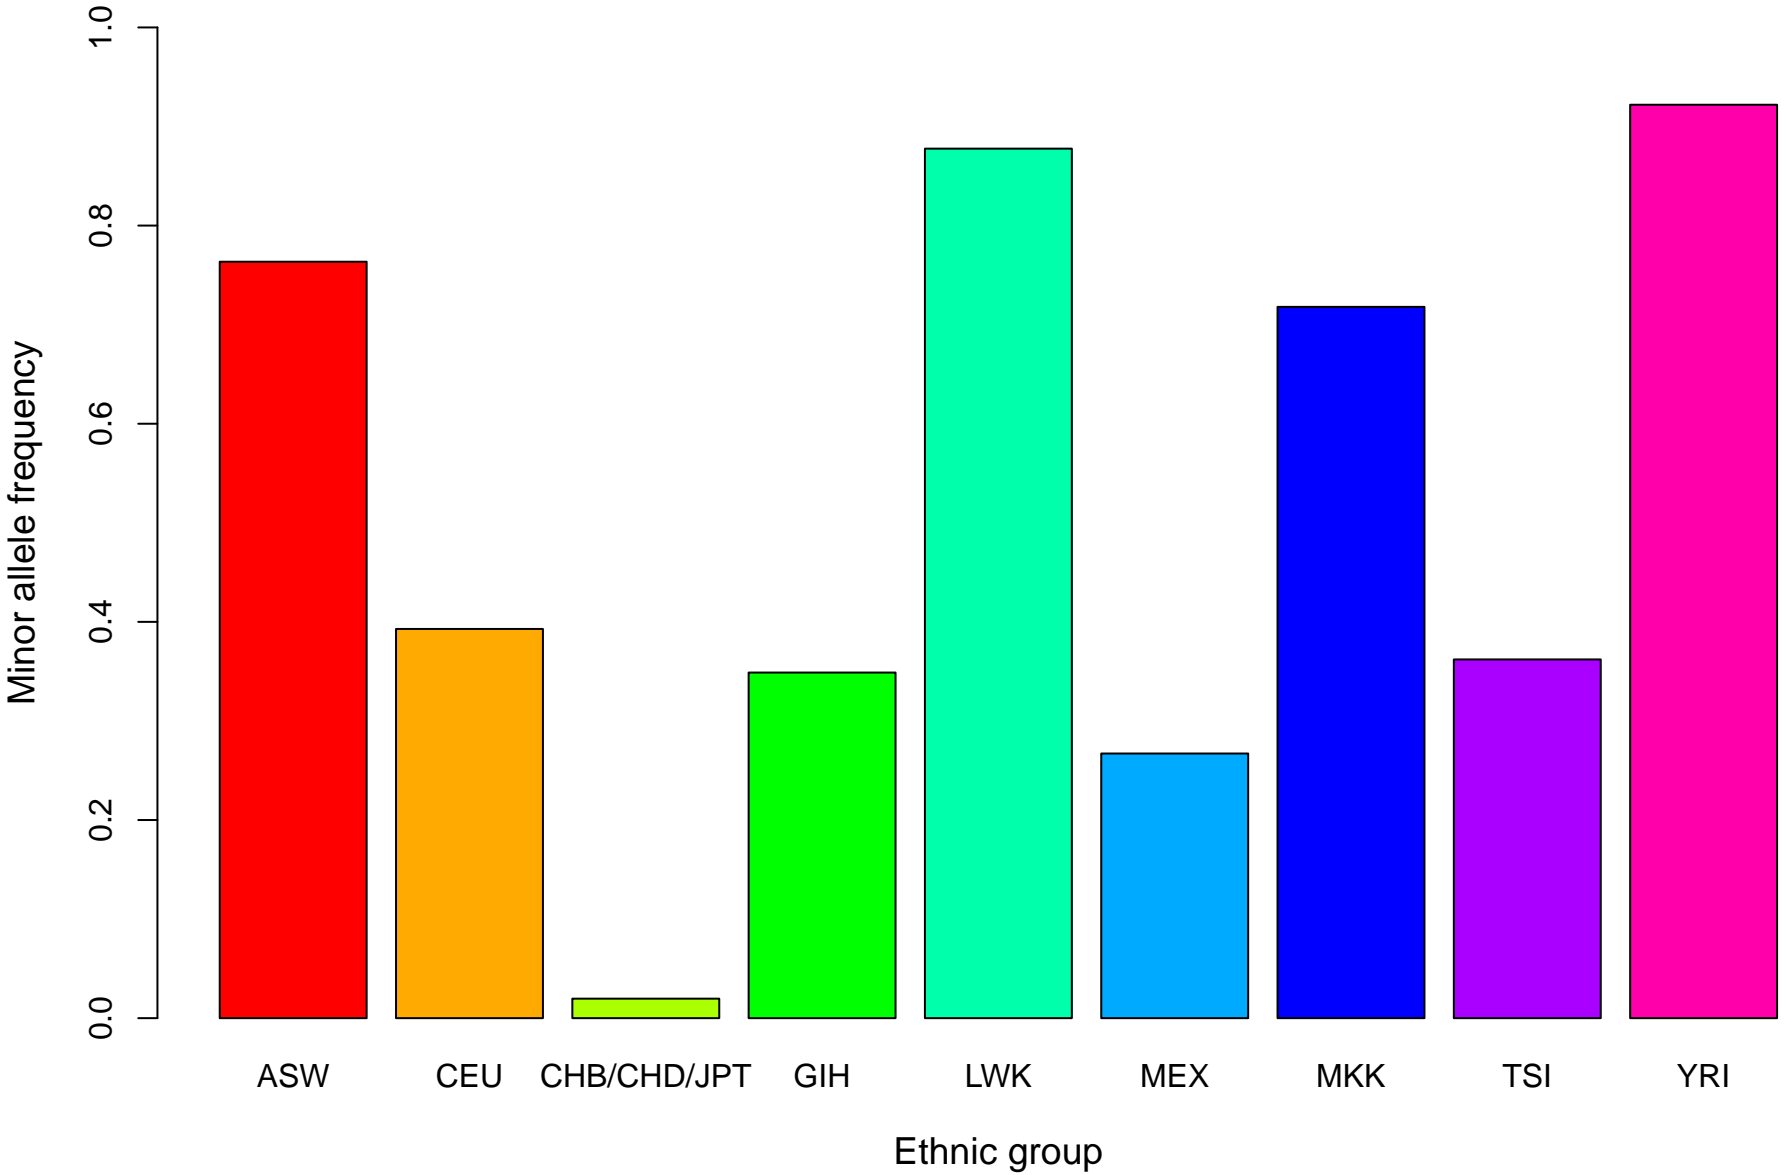

# rs12162165\_C

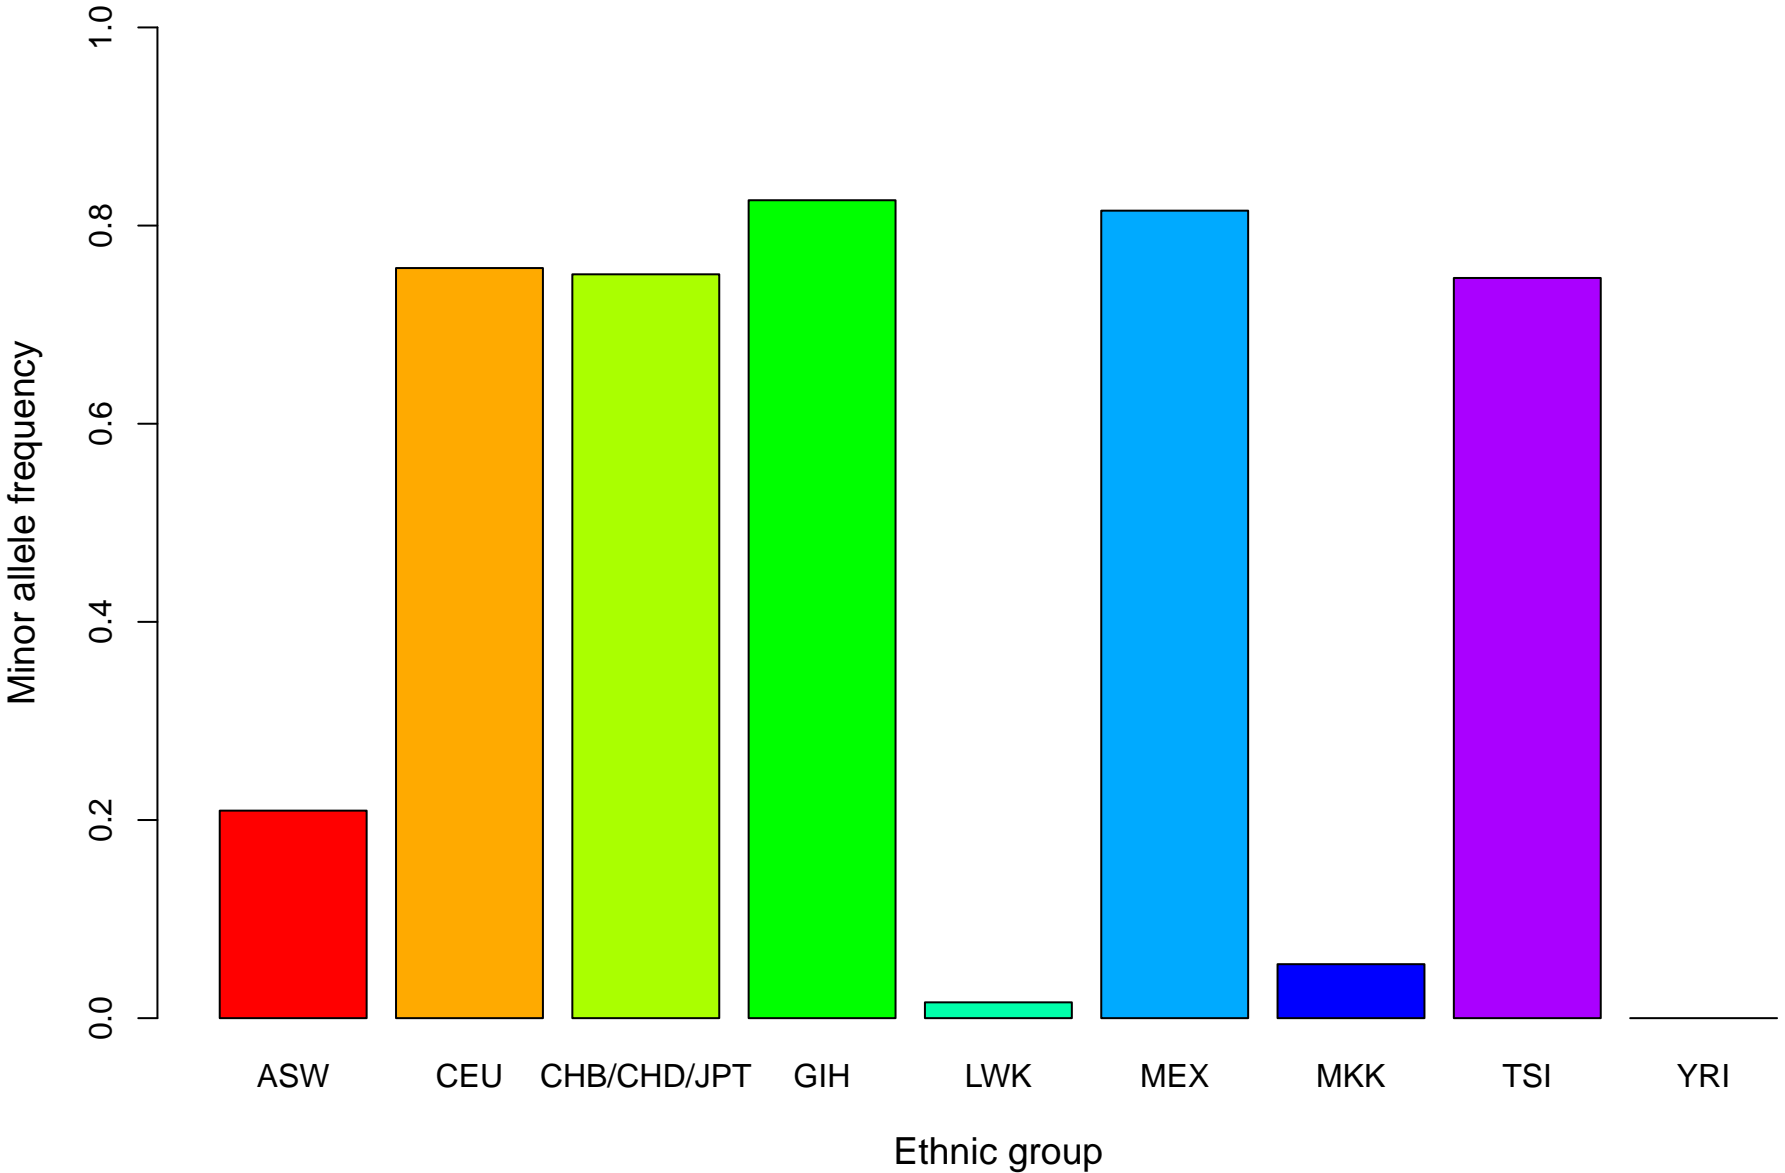

# rs2900117\_A

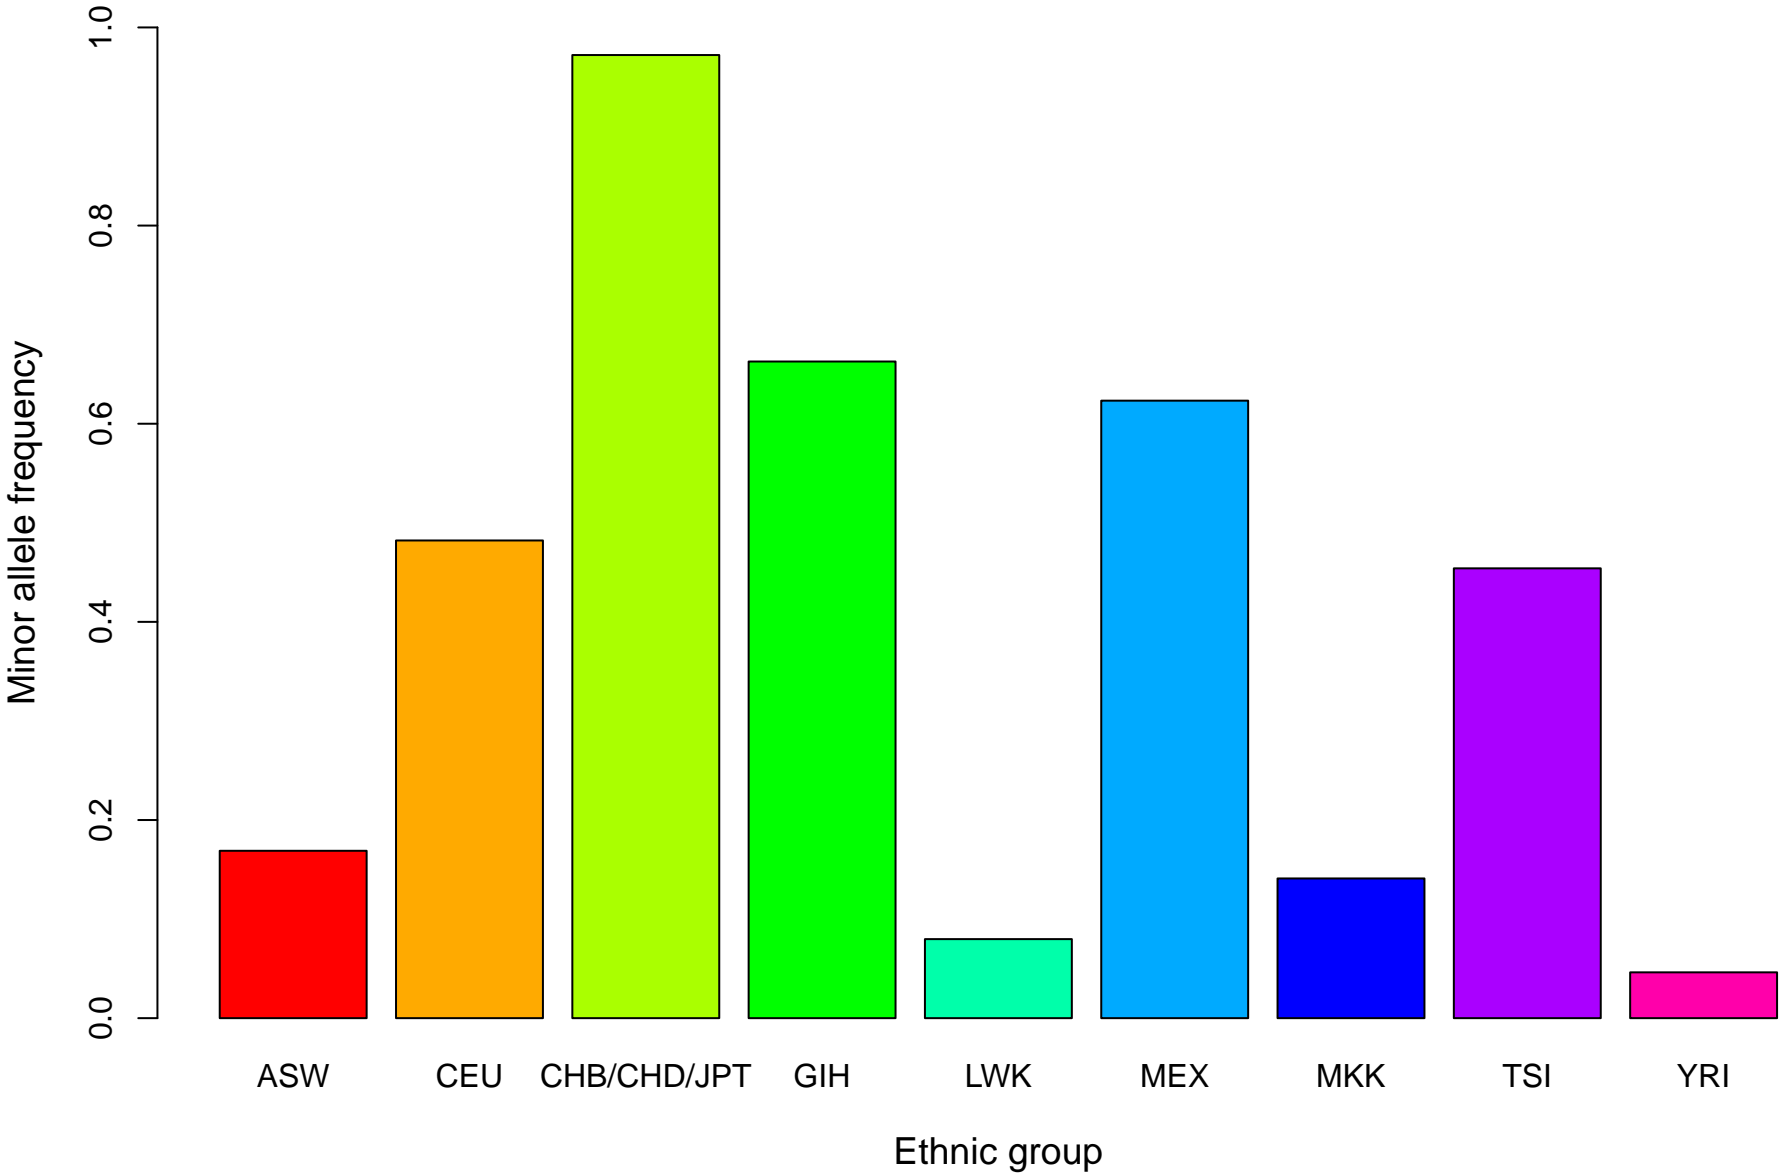

# rs6731289\_C

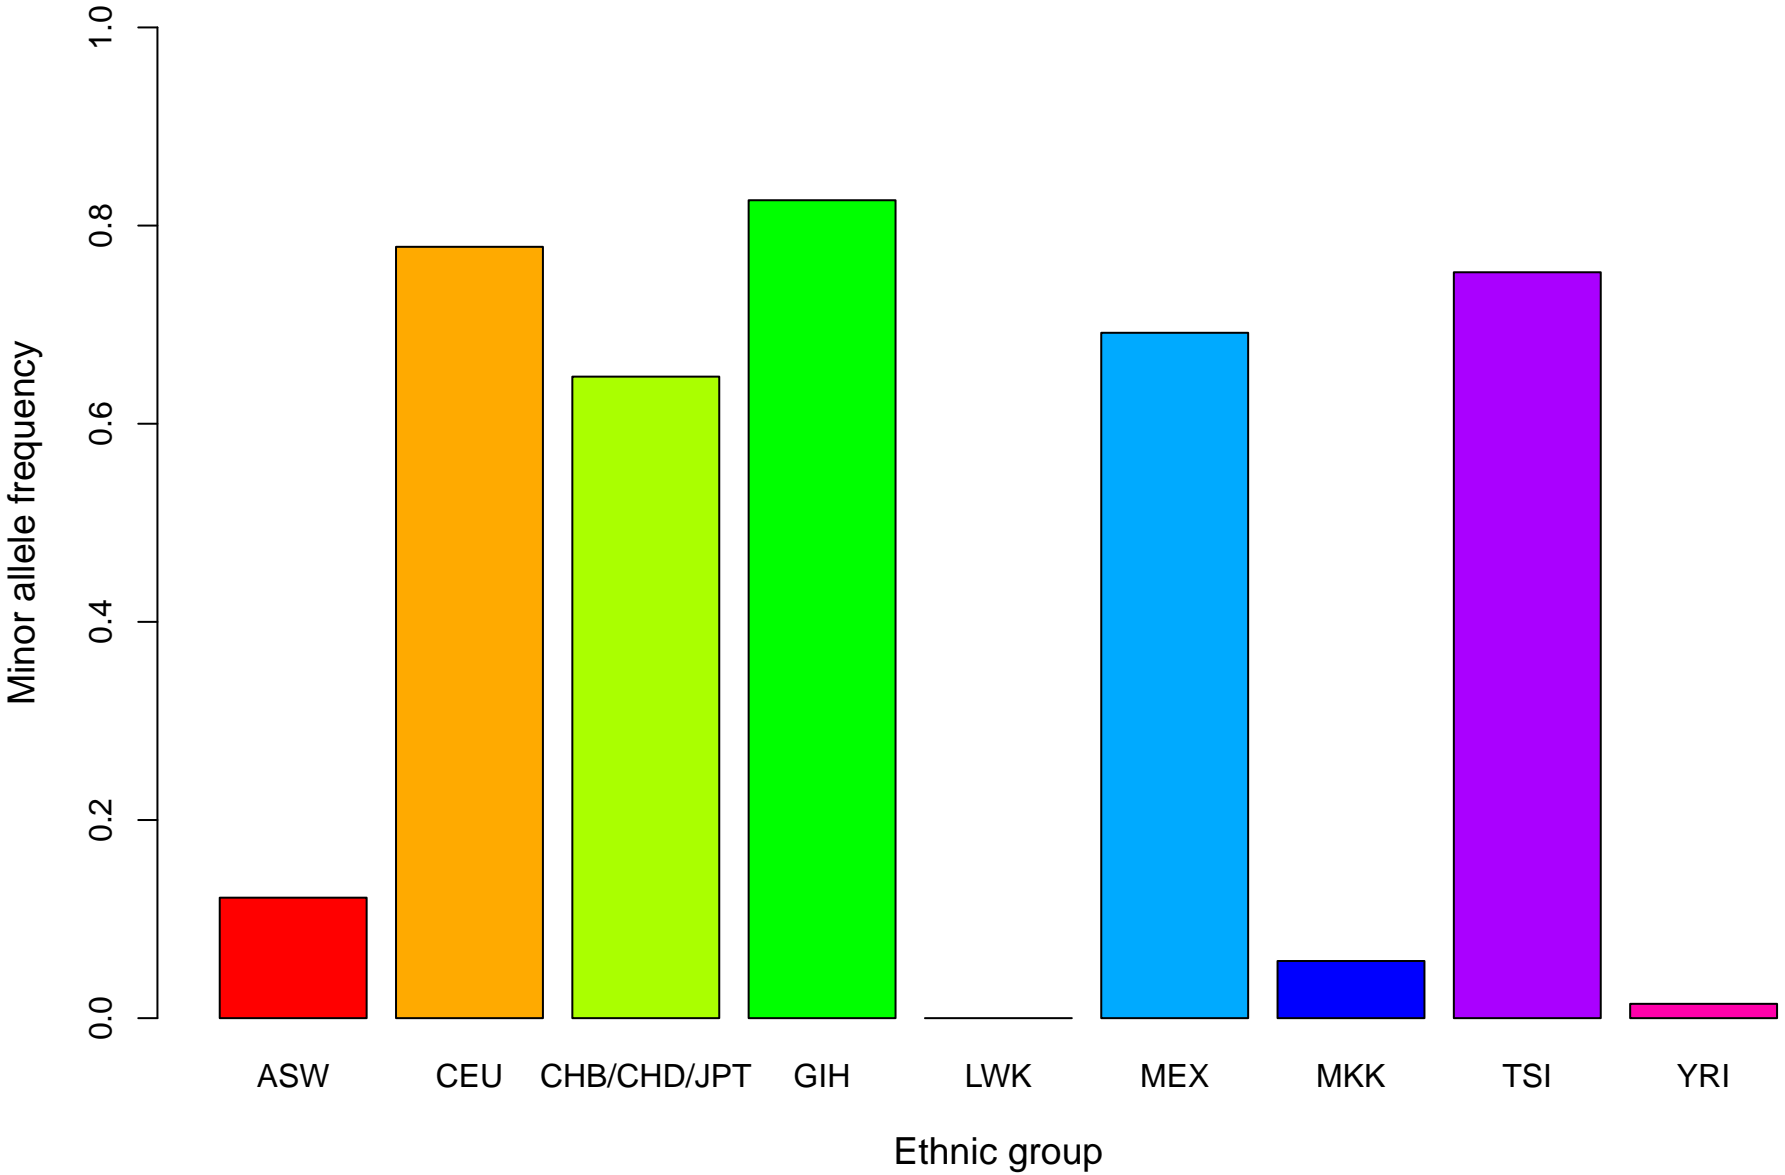

# rs2104483\_T

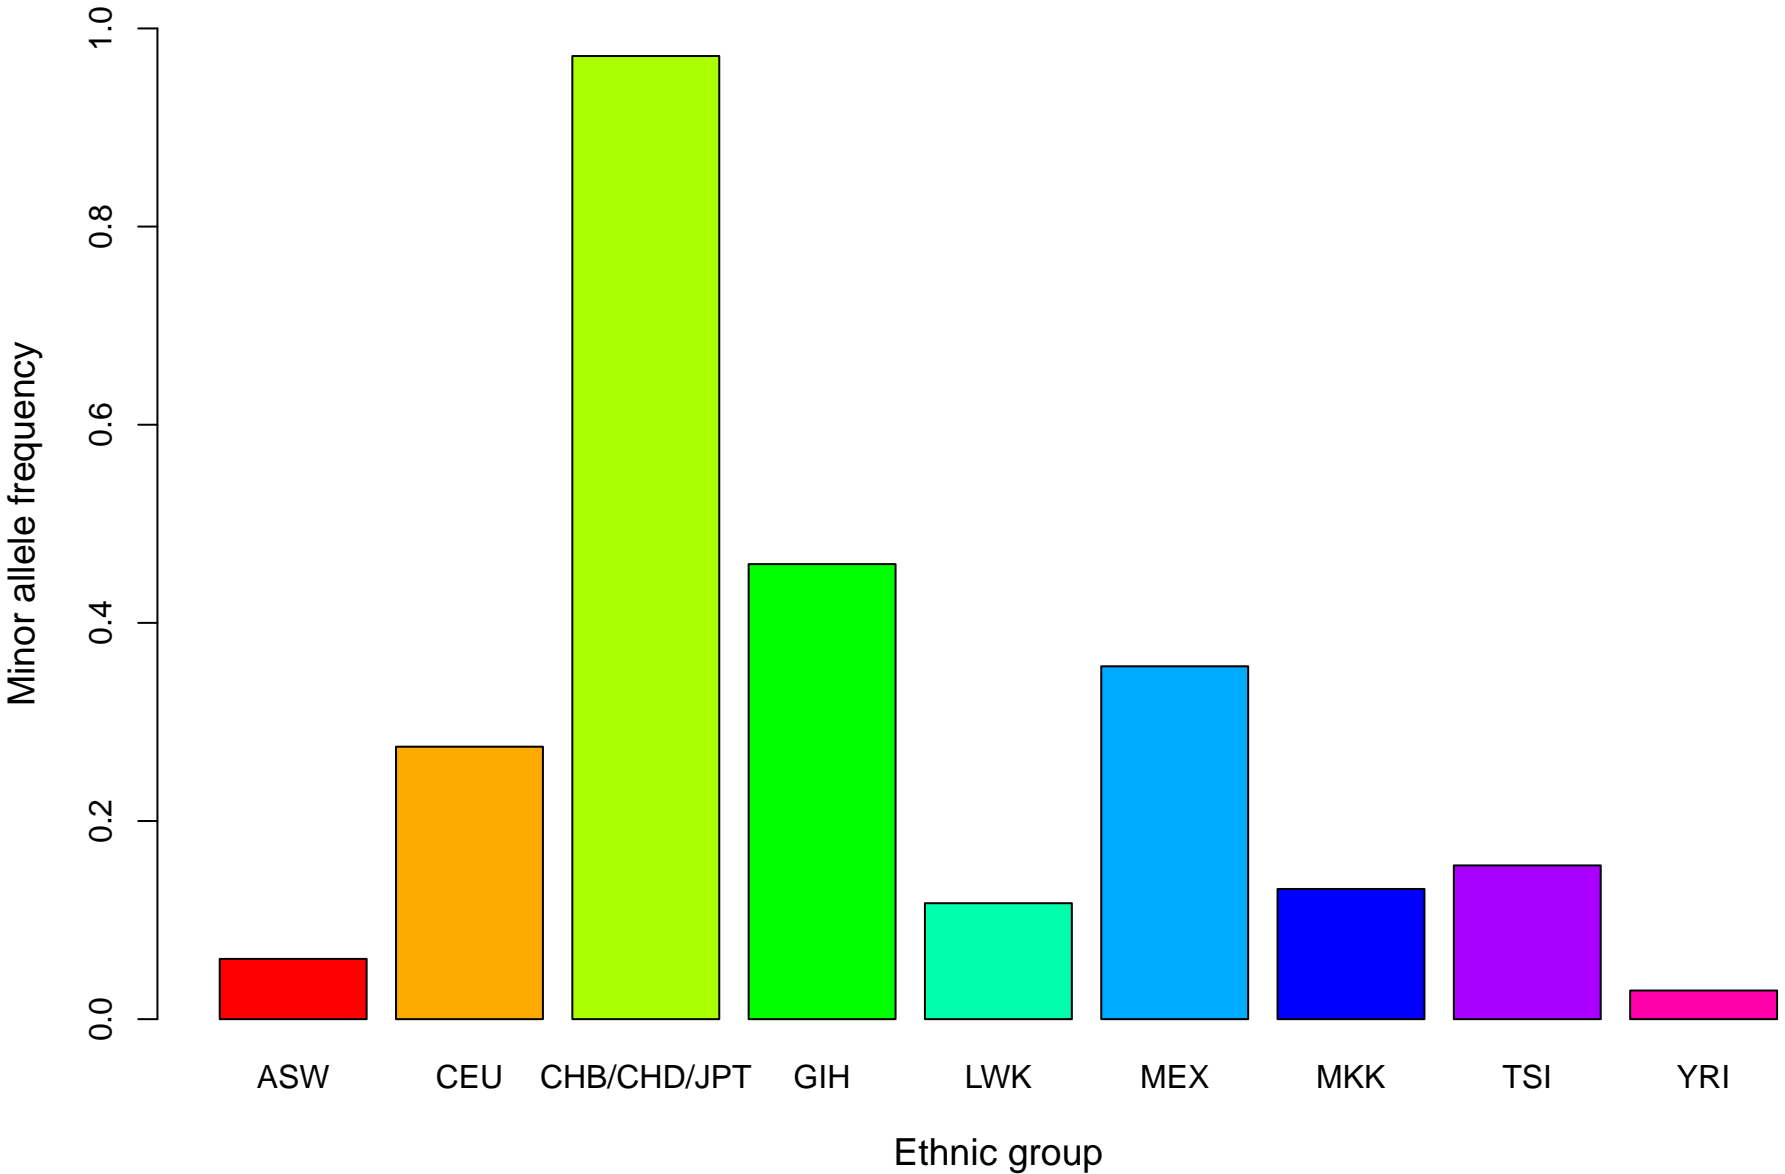

# rs6601550\_T

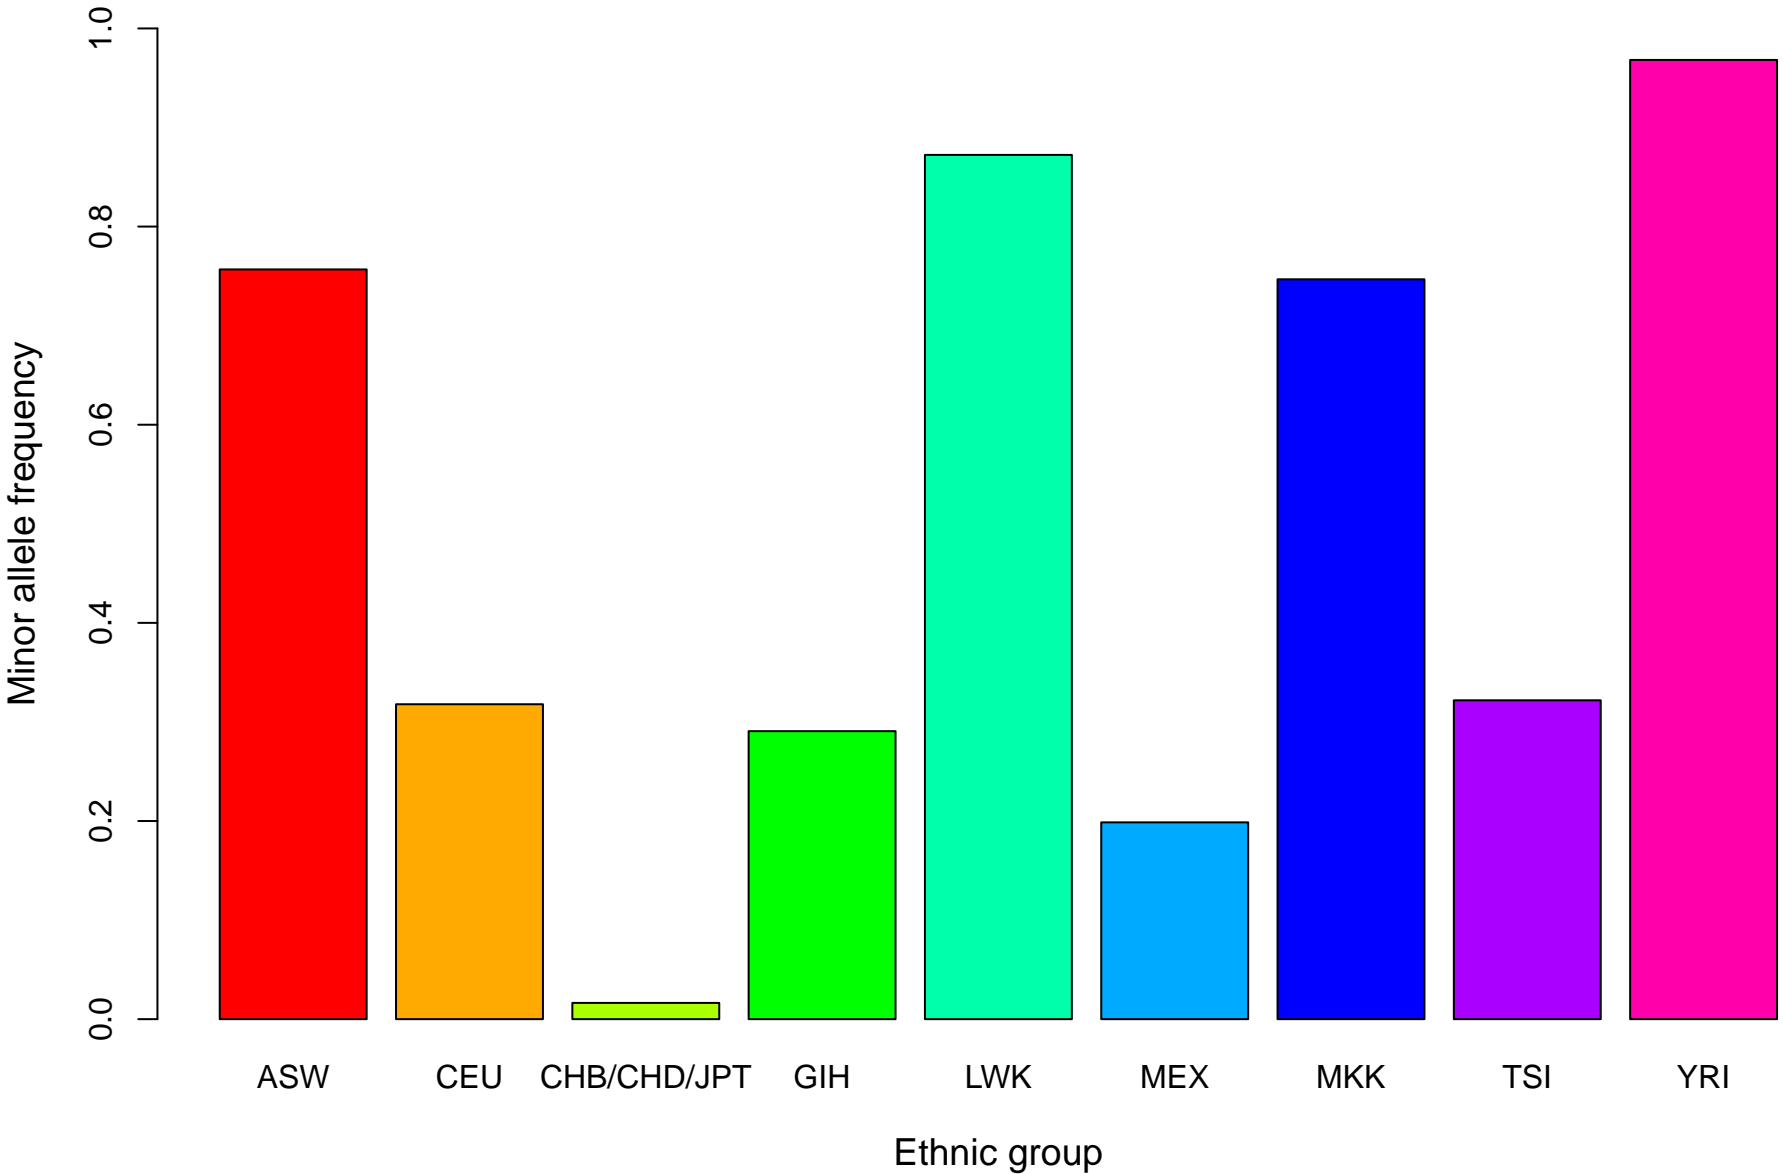



# rs4507607\_A

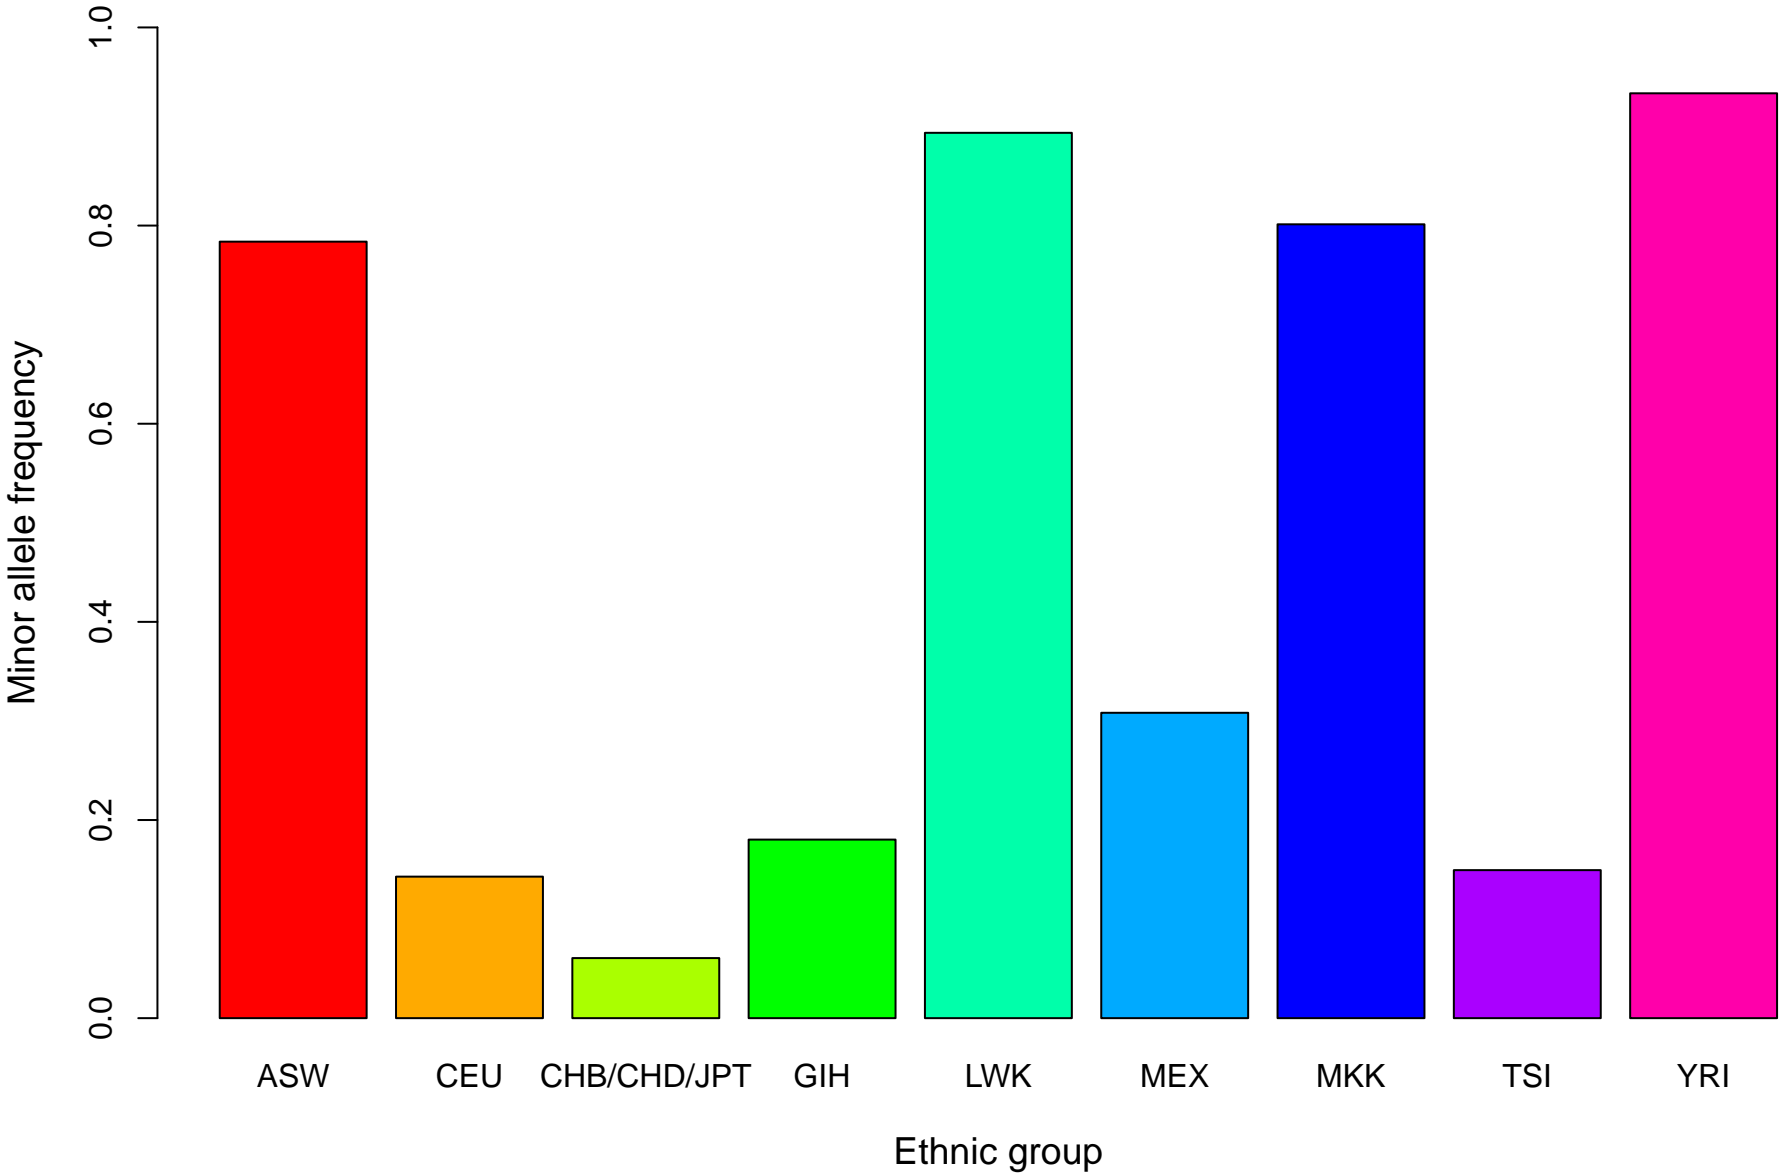

# rs13400225\_A

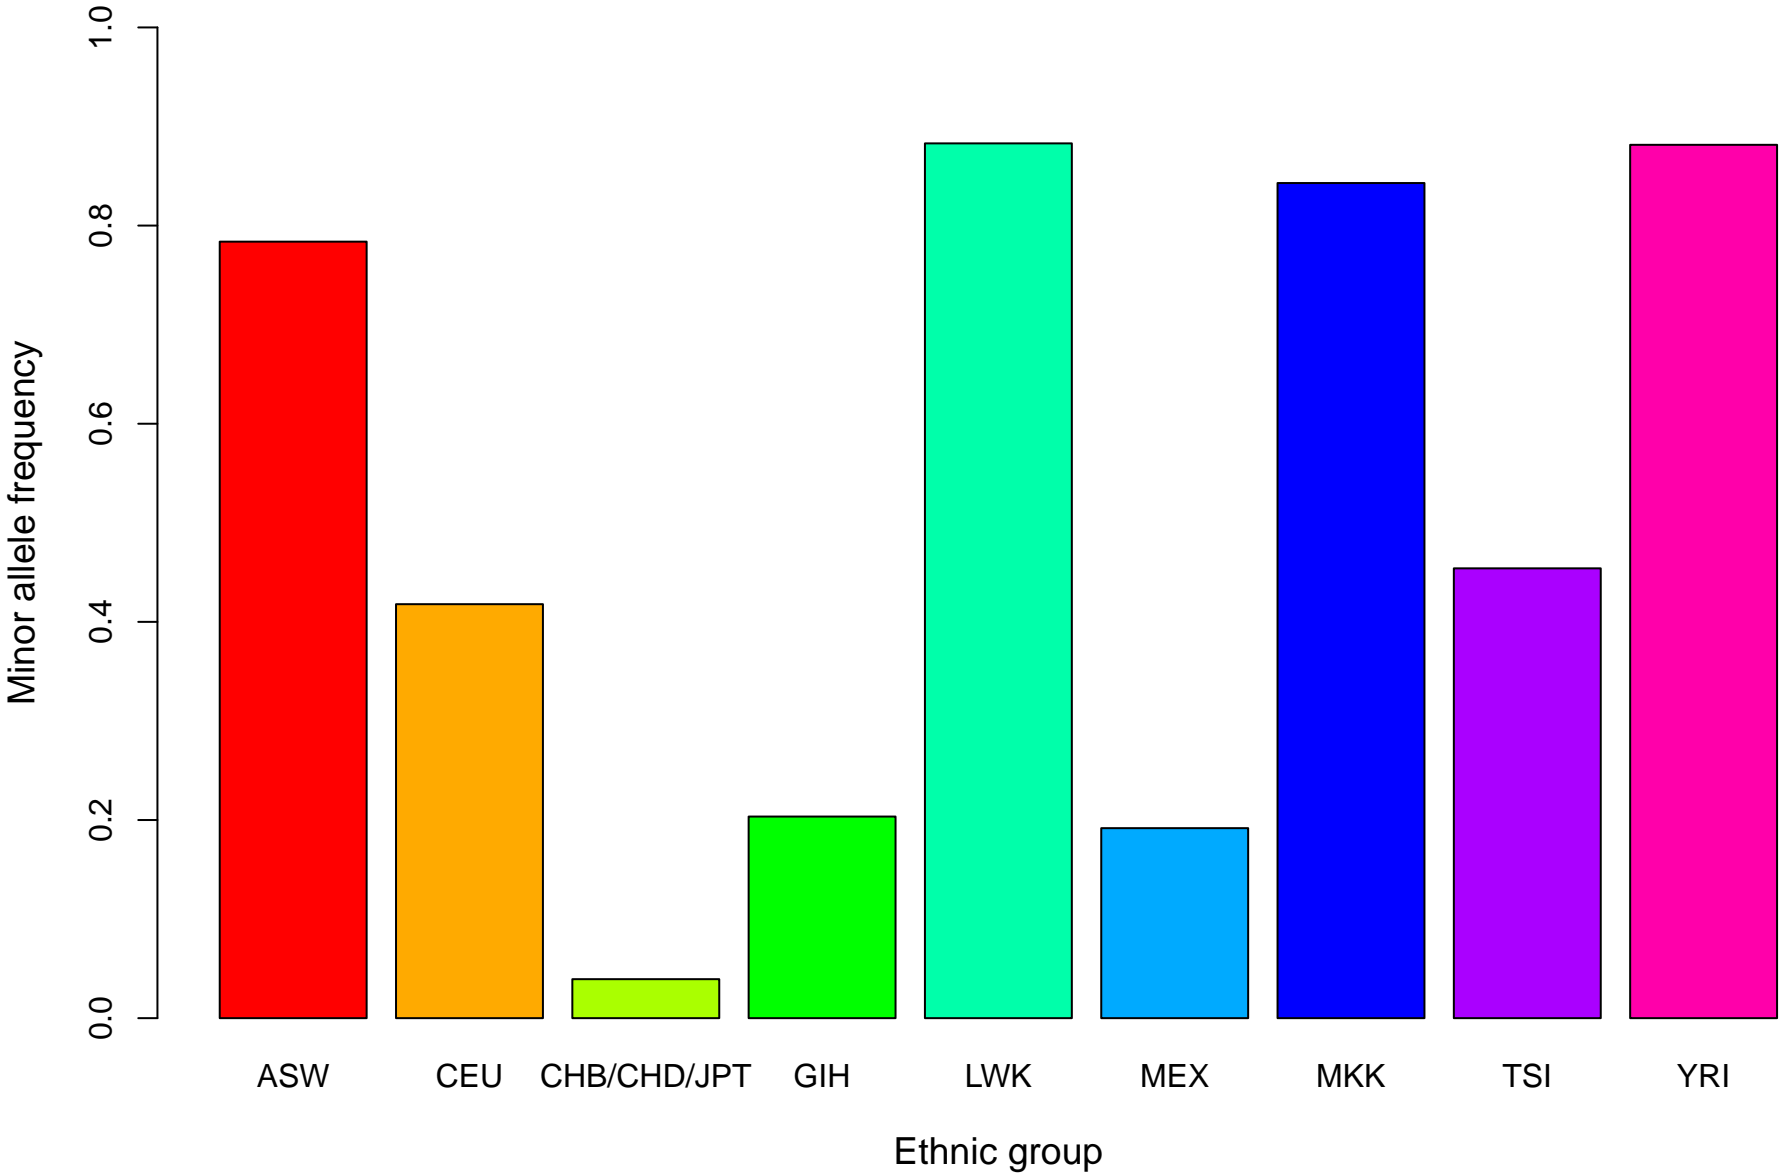

# rs2301550\_G

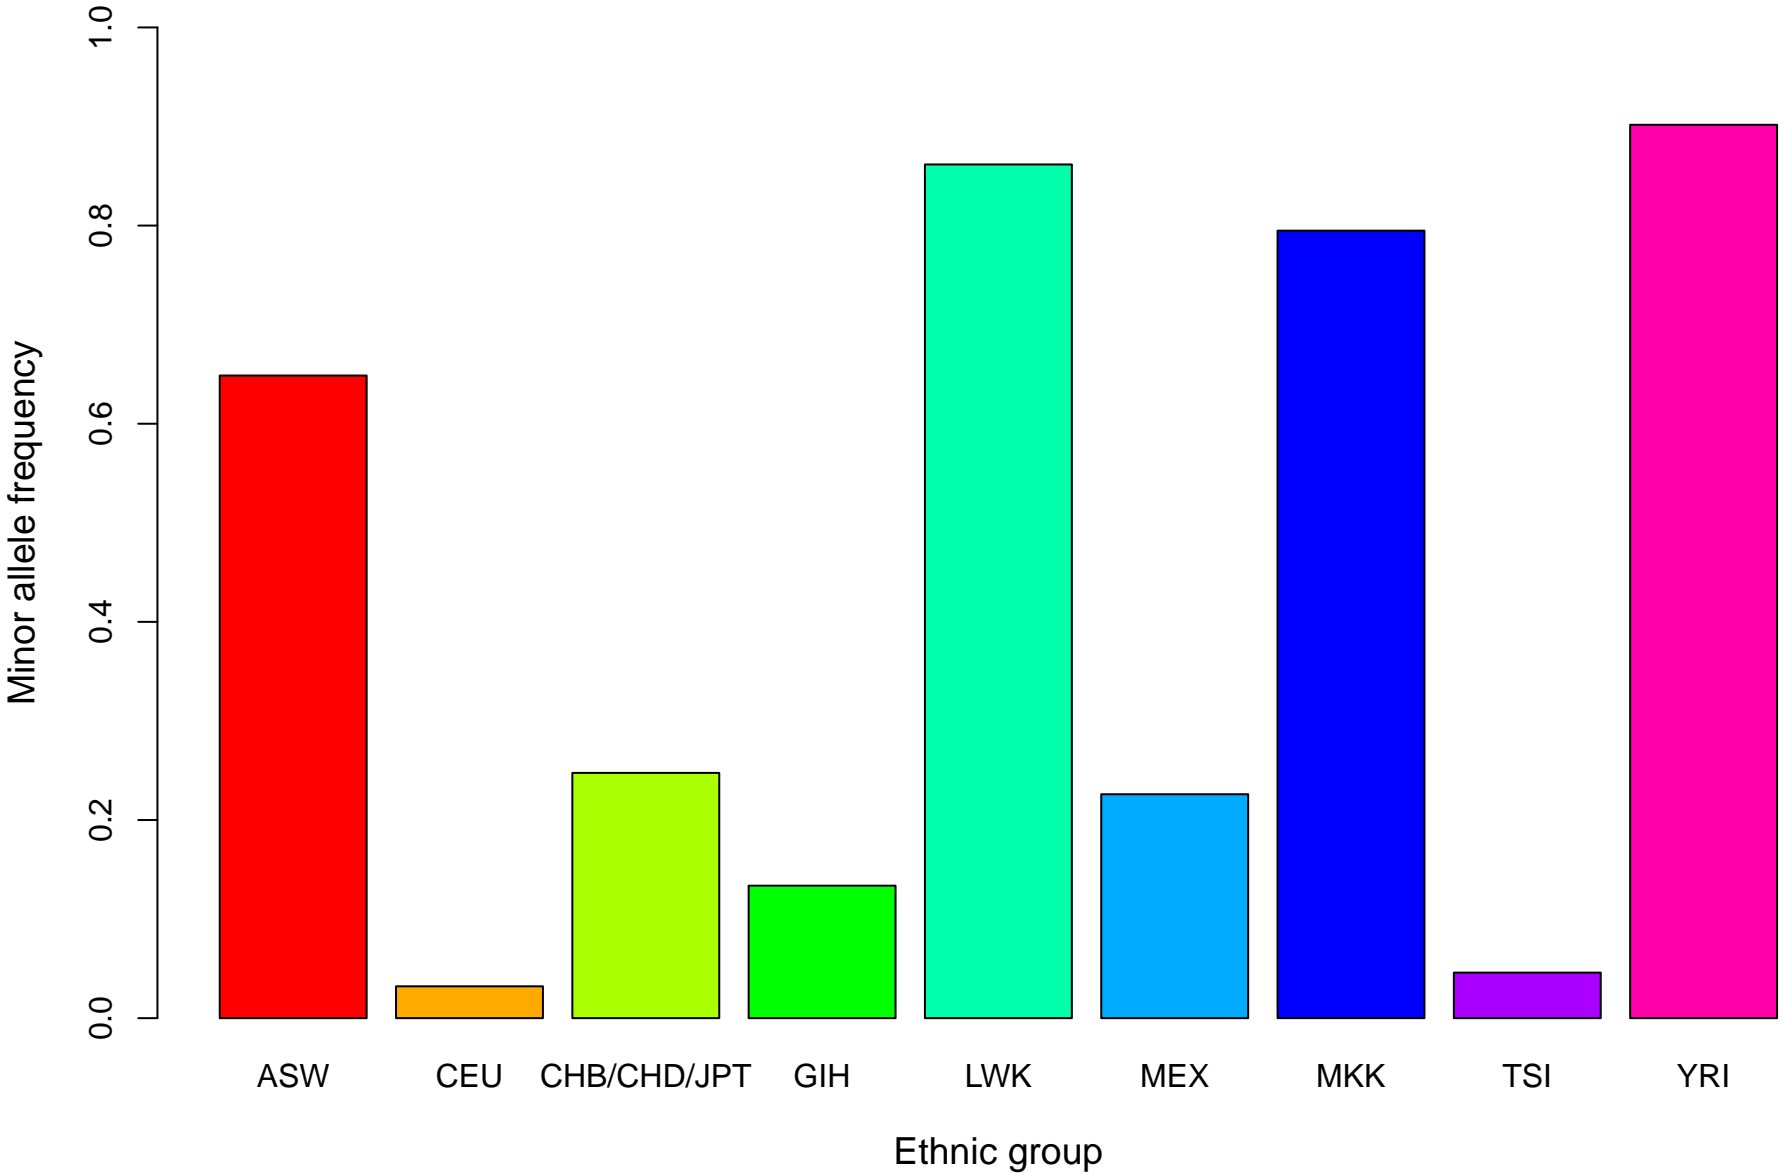

# rs1269195\_T

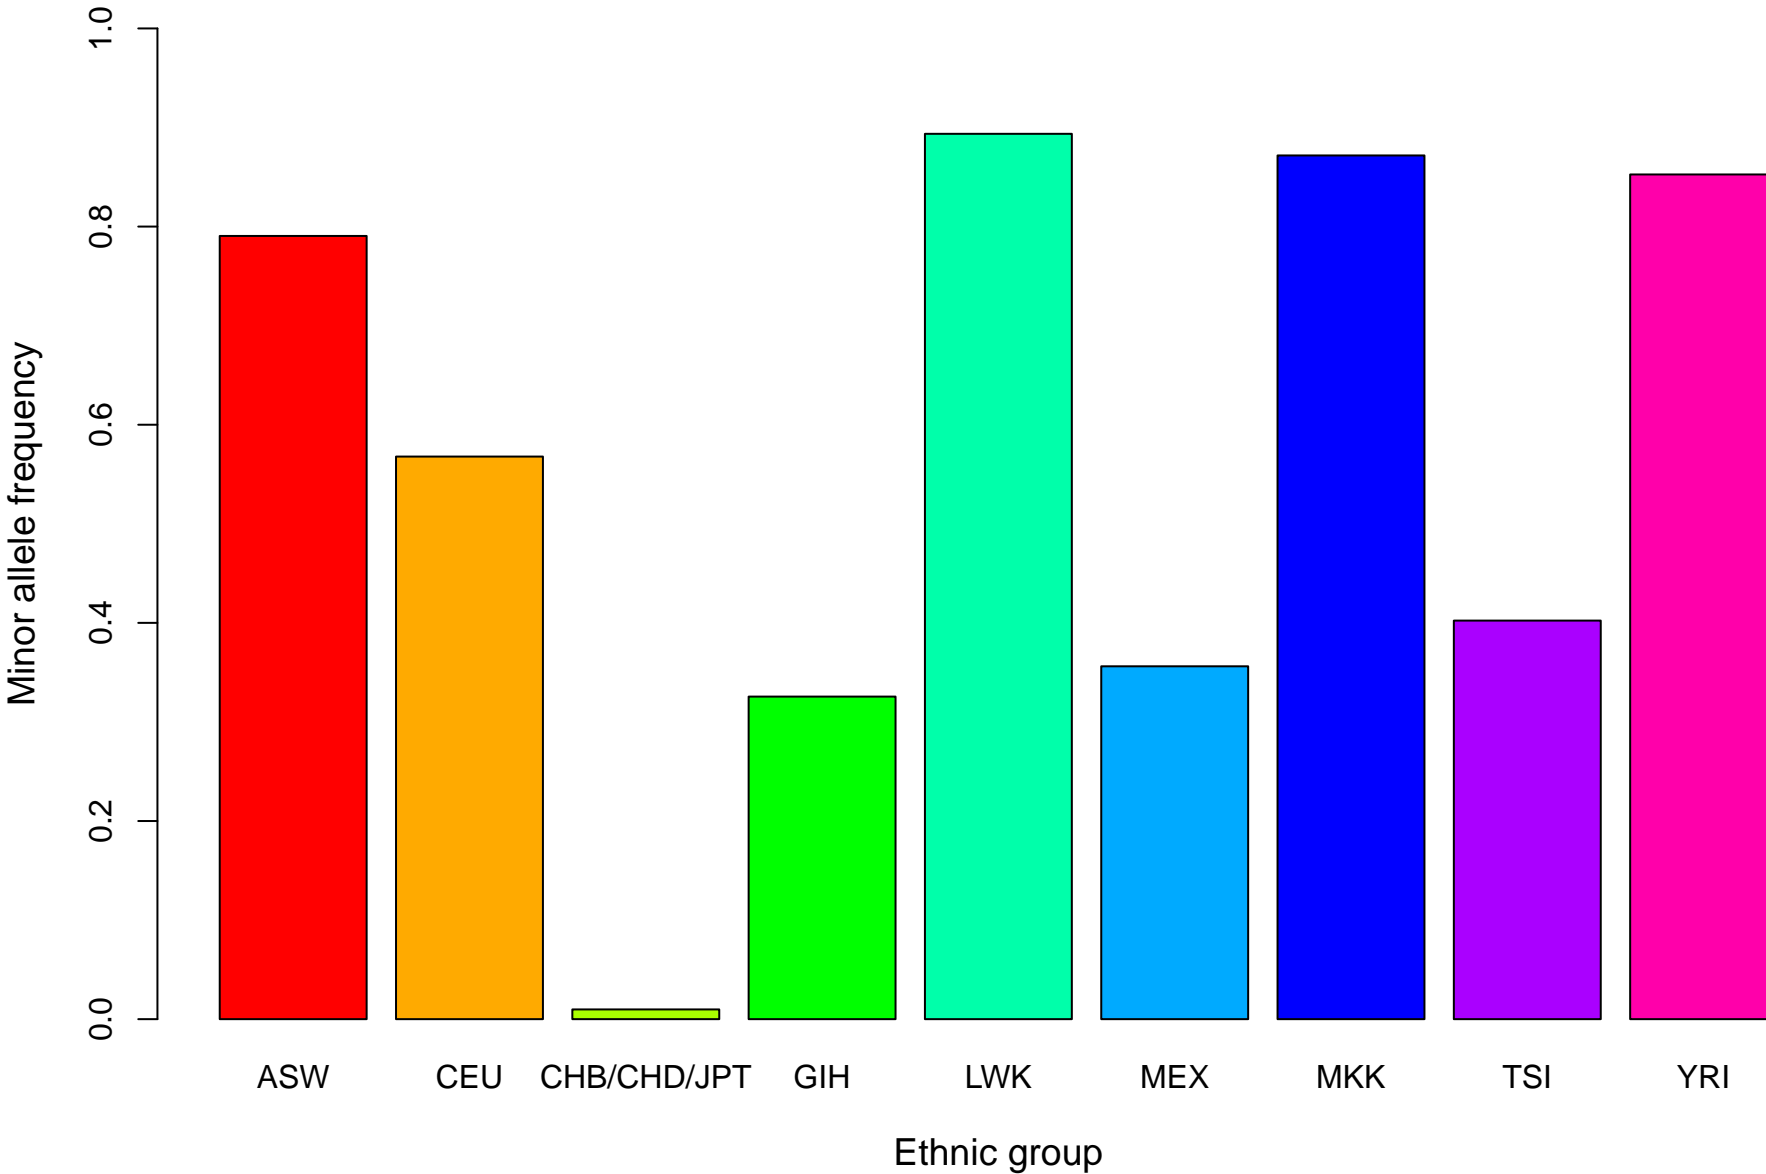

# rs13003464\_G

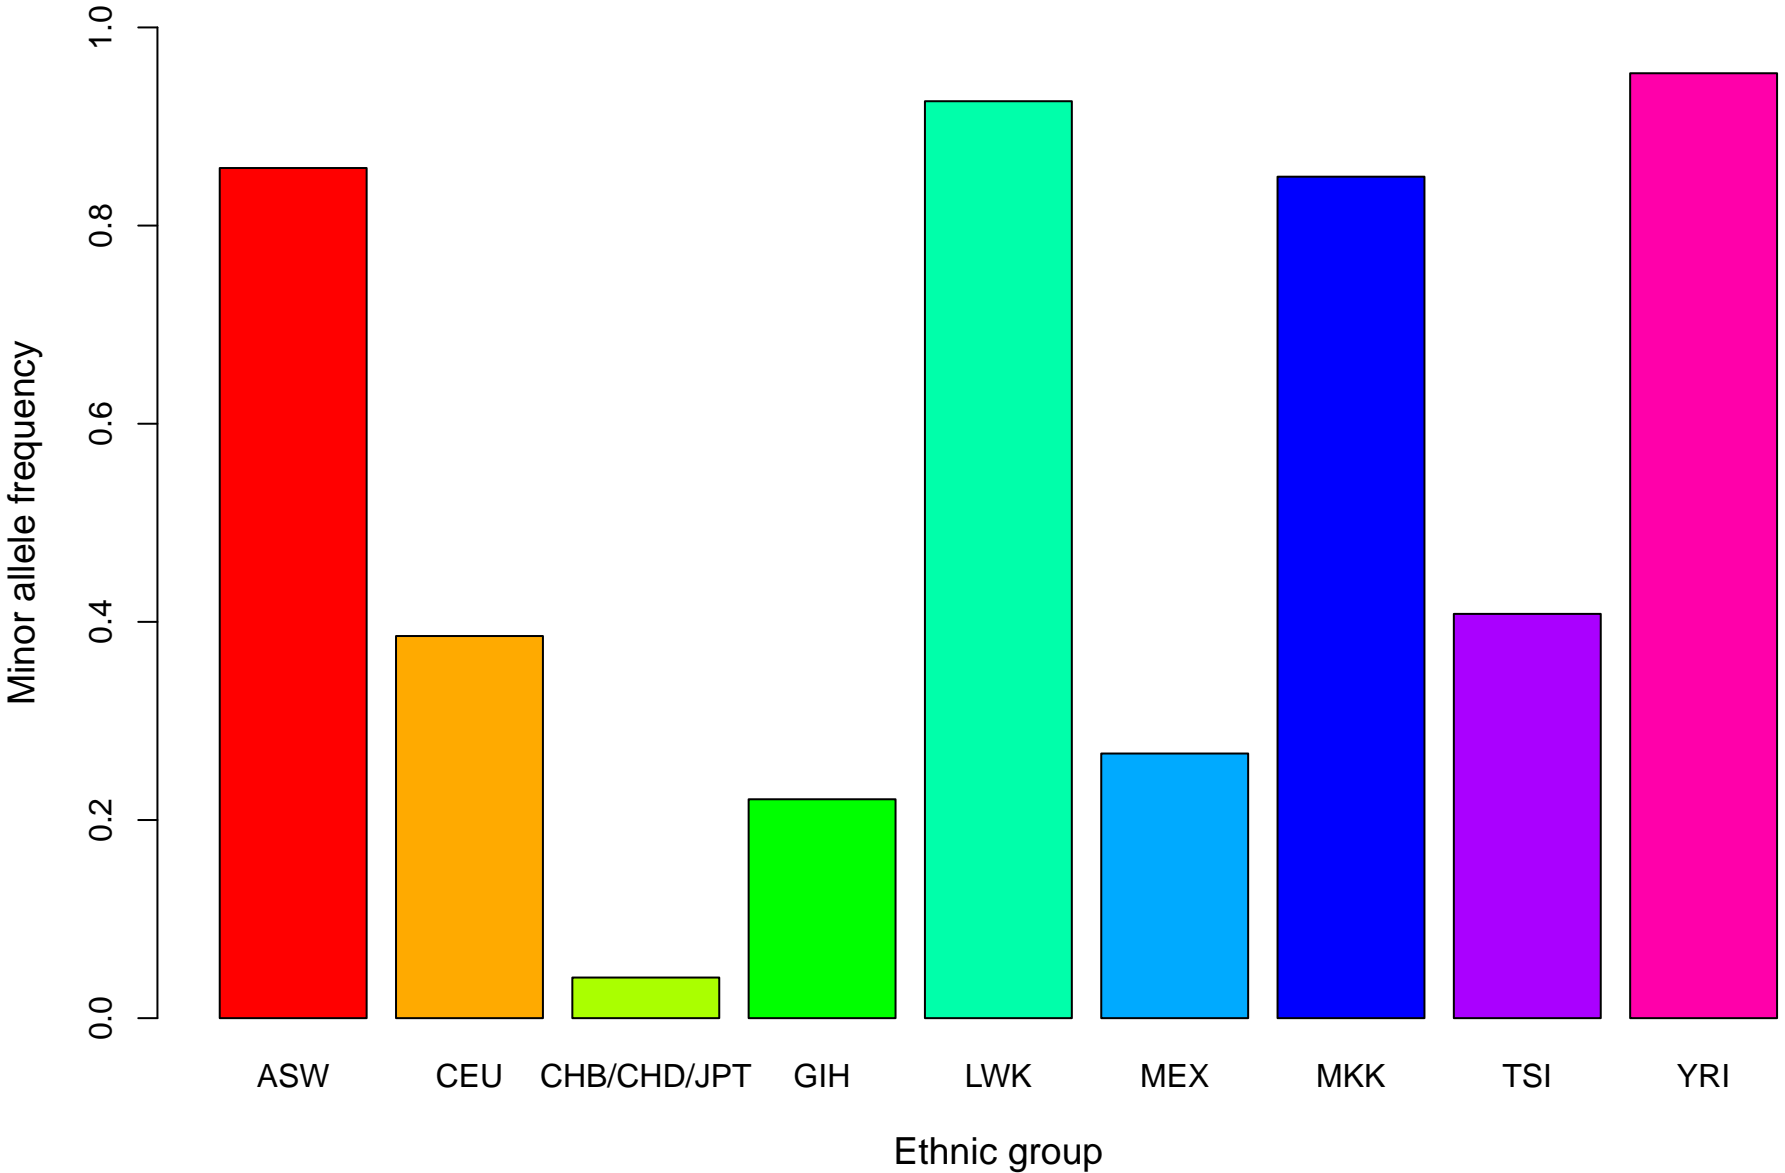

# rs2104388\_C

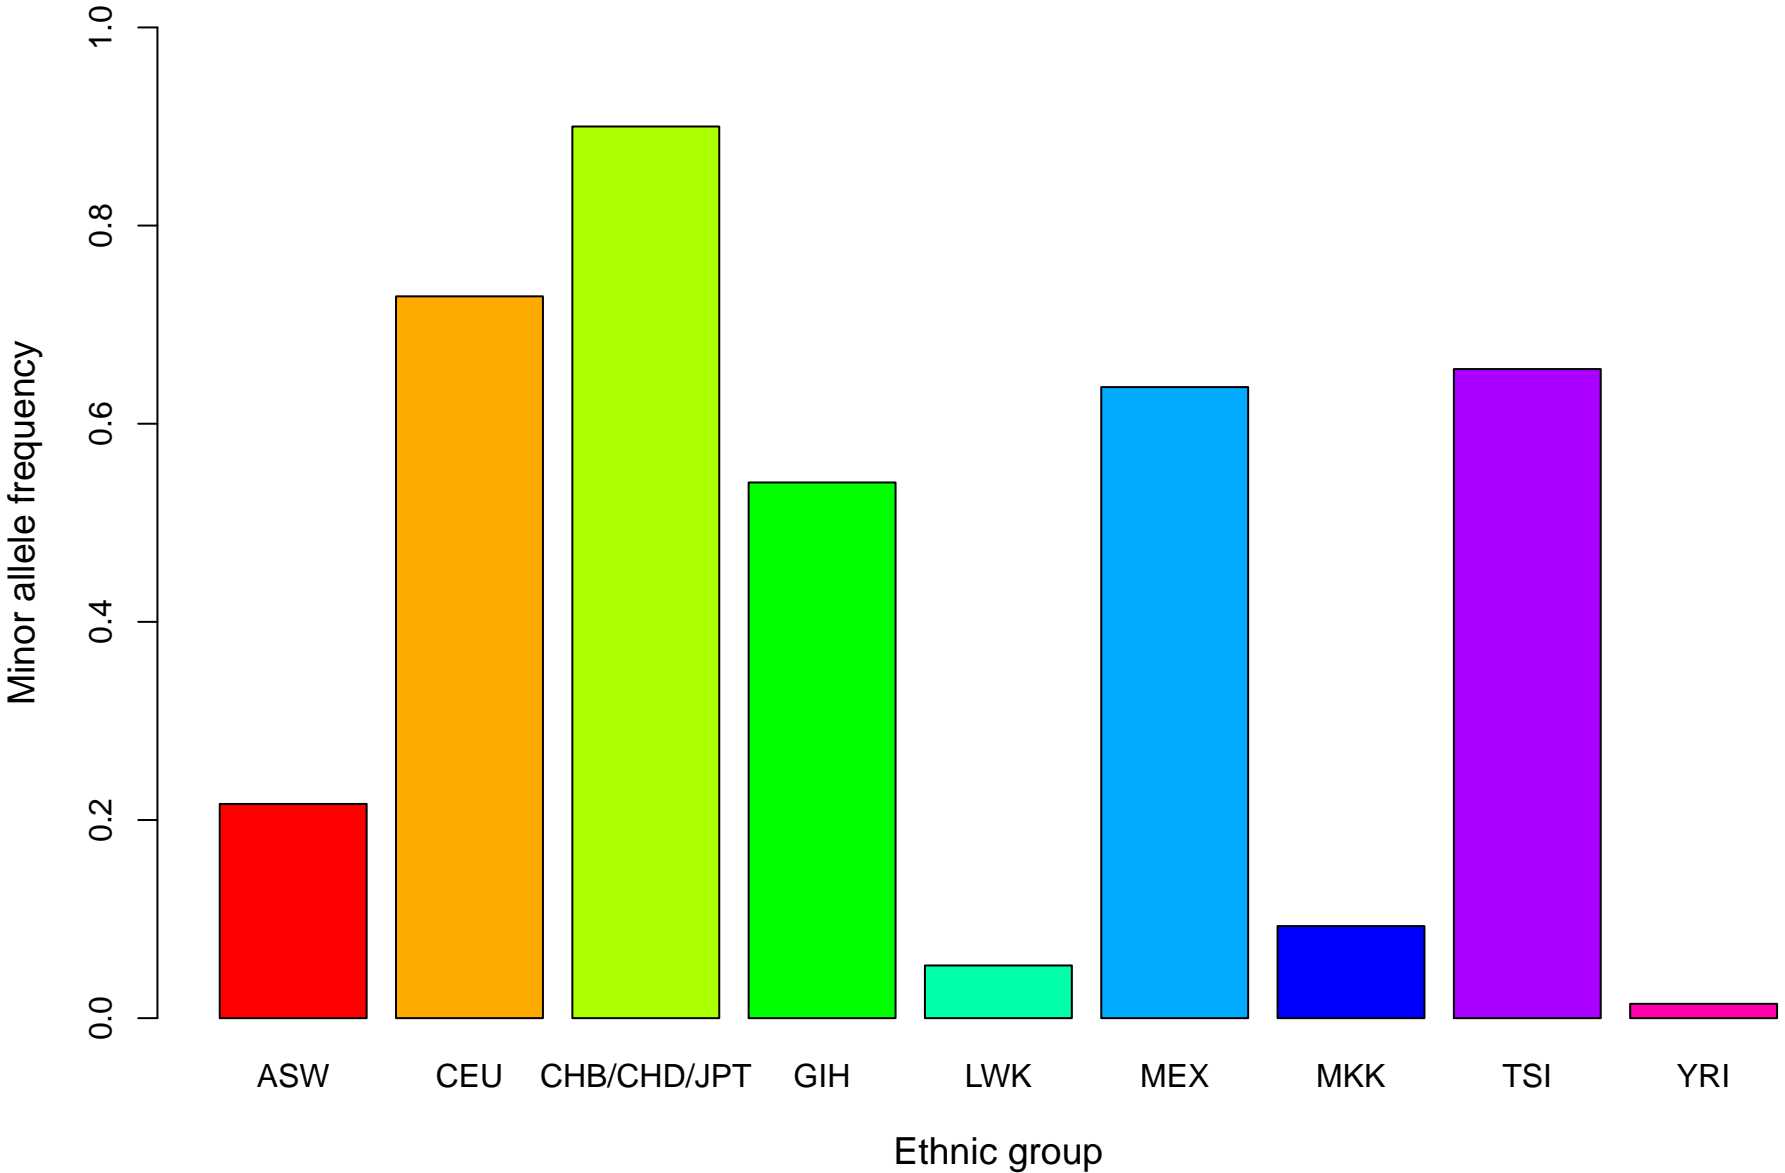

# rs2572450\_T

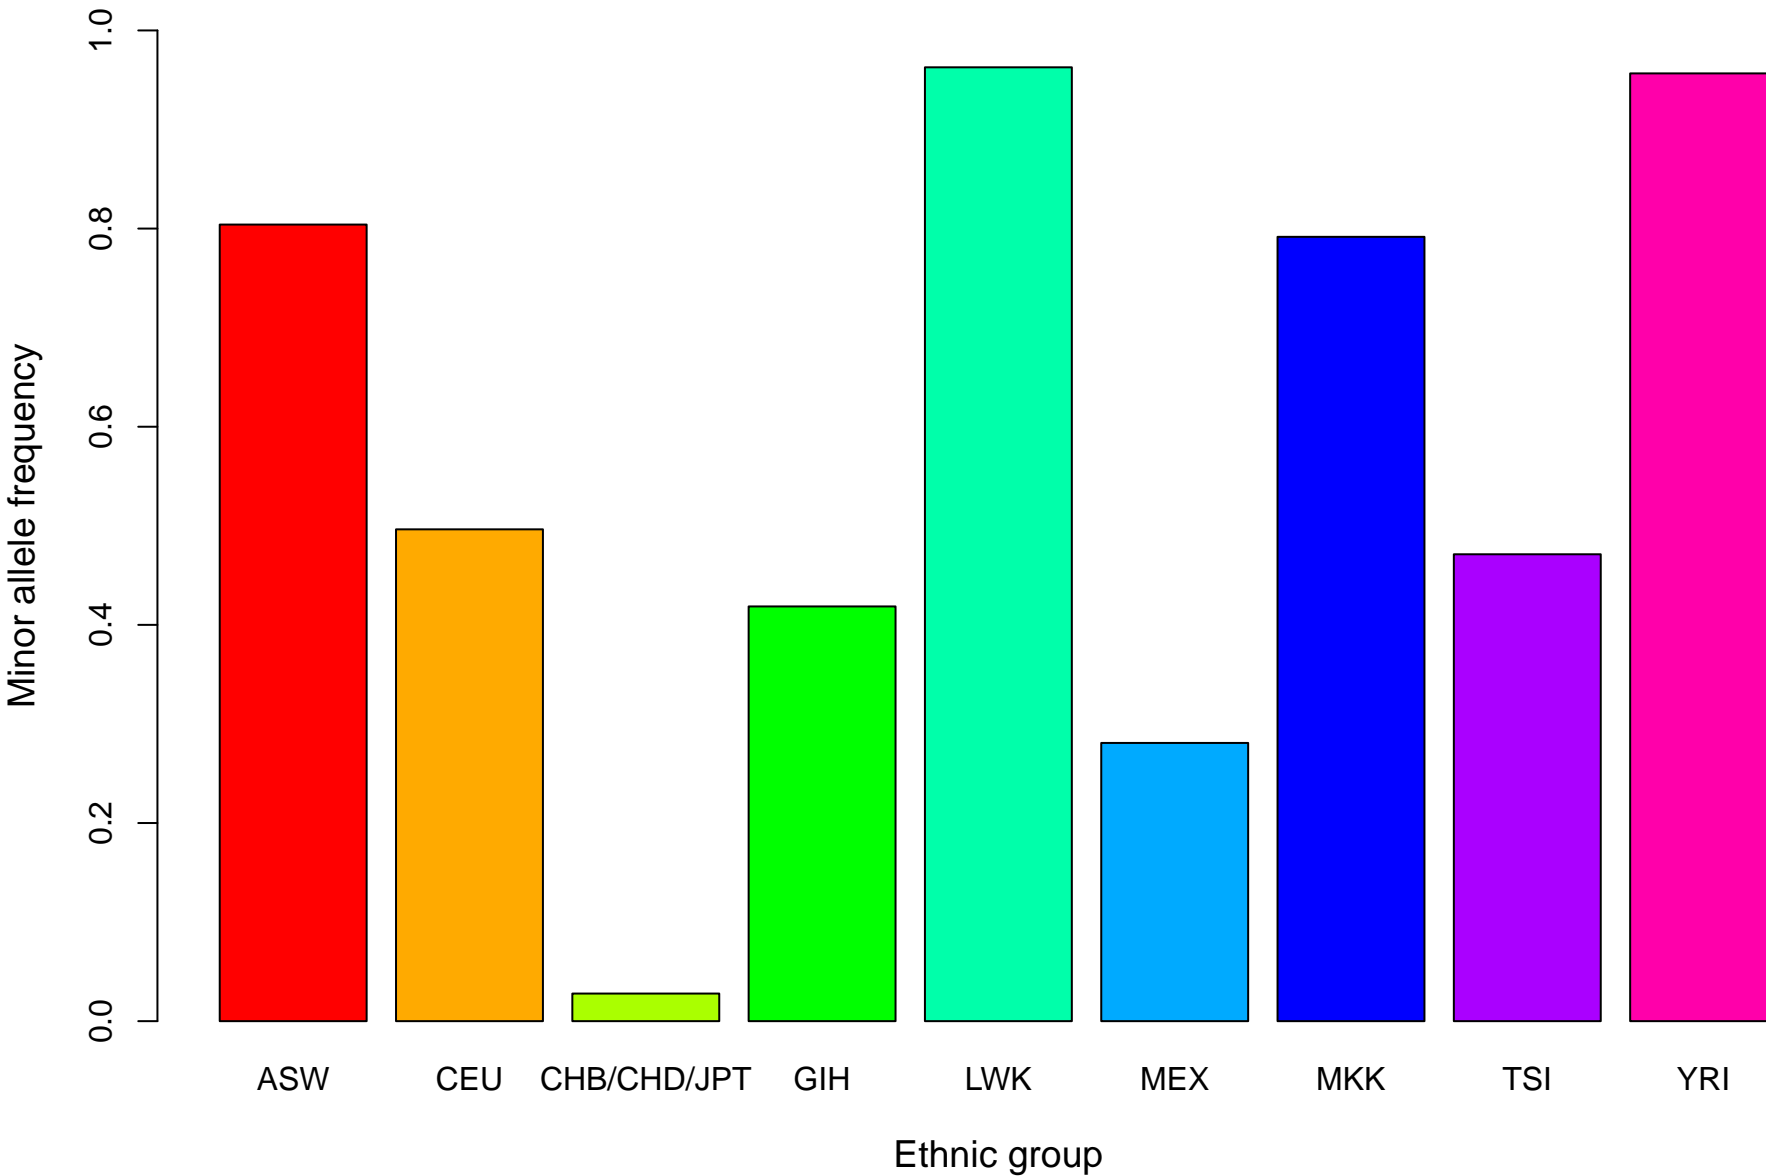

# rs6992002\_A

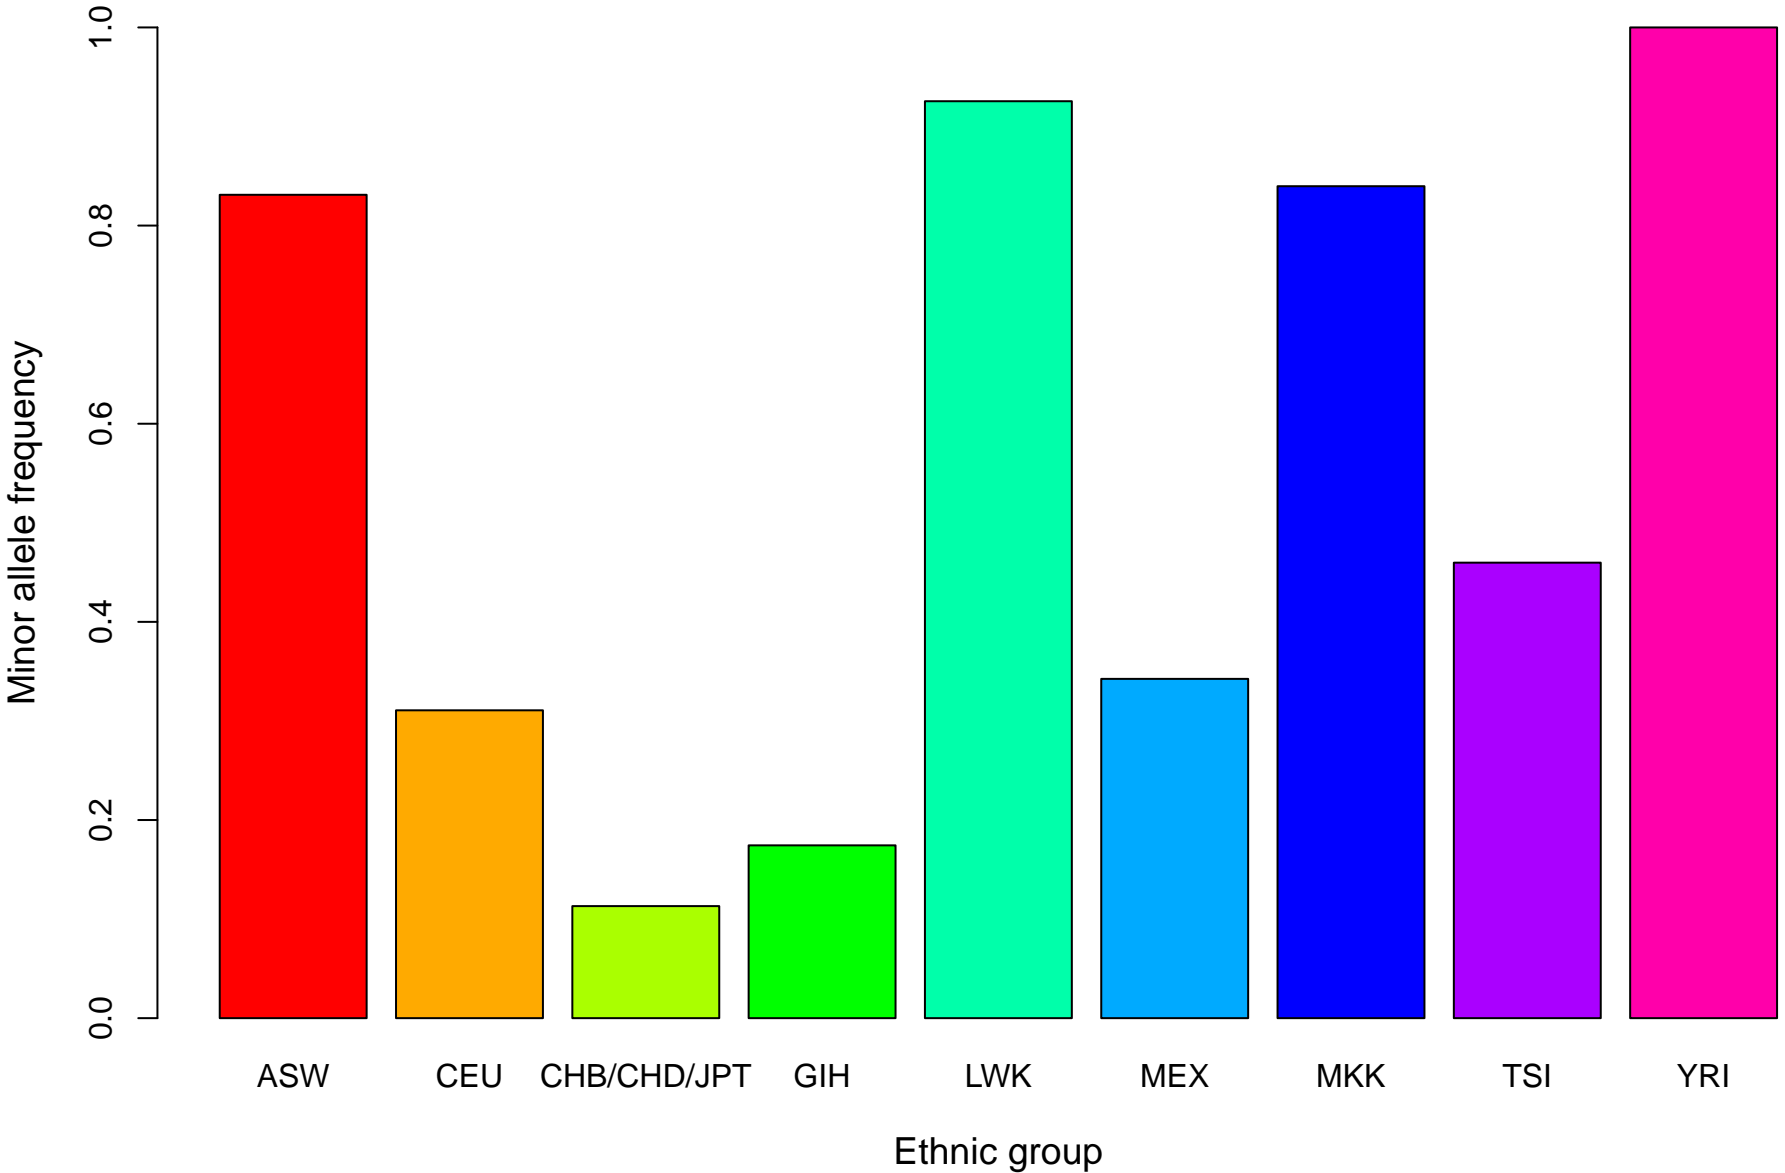



# rs13021679\_T

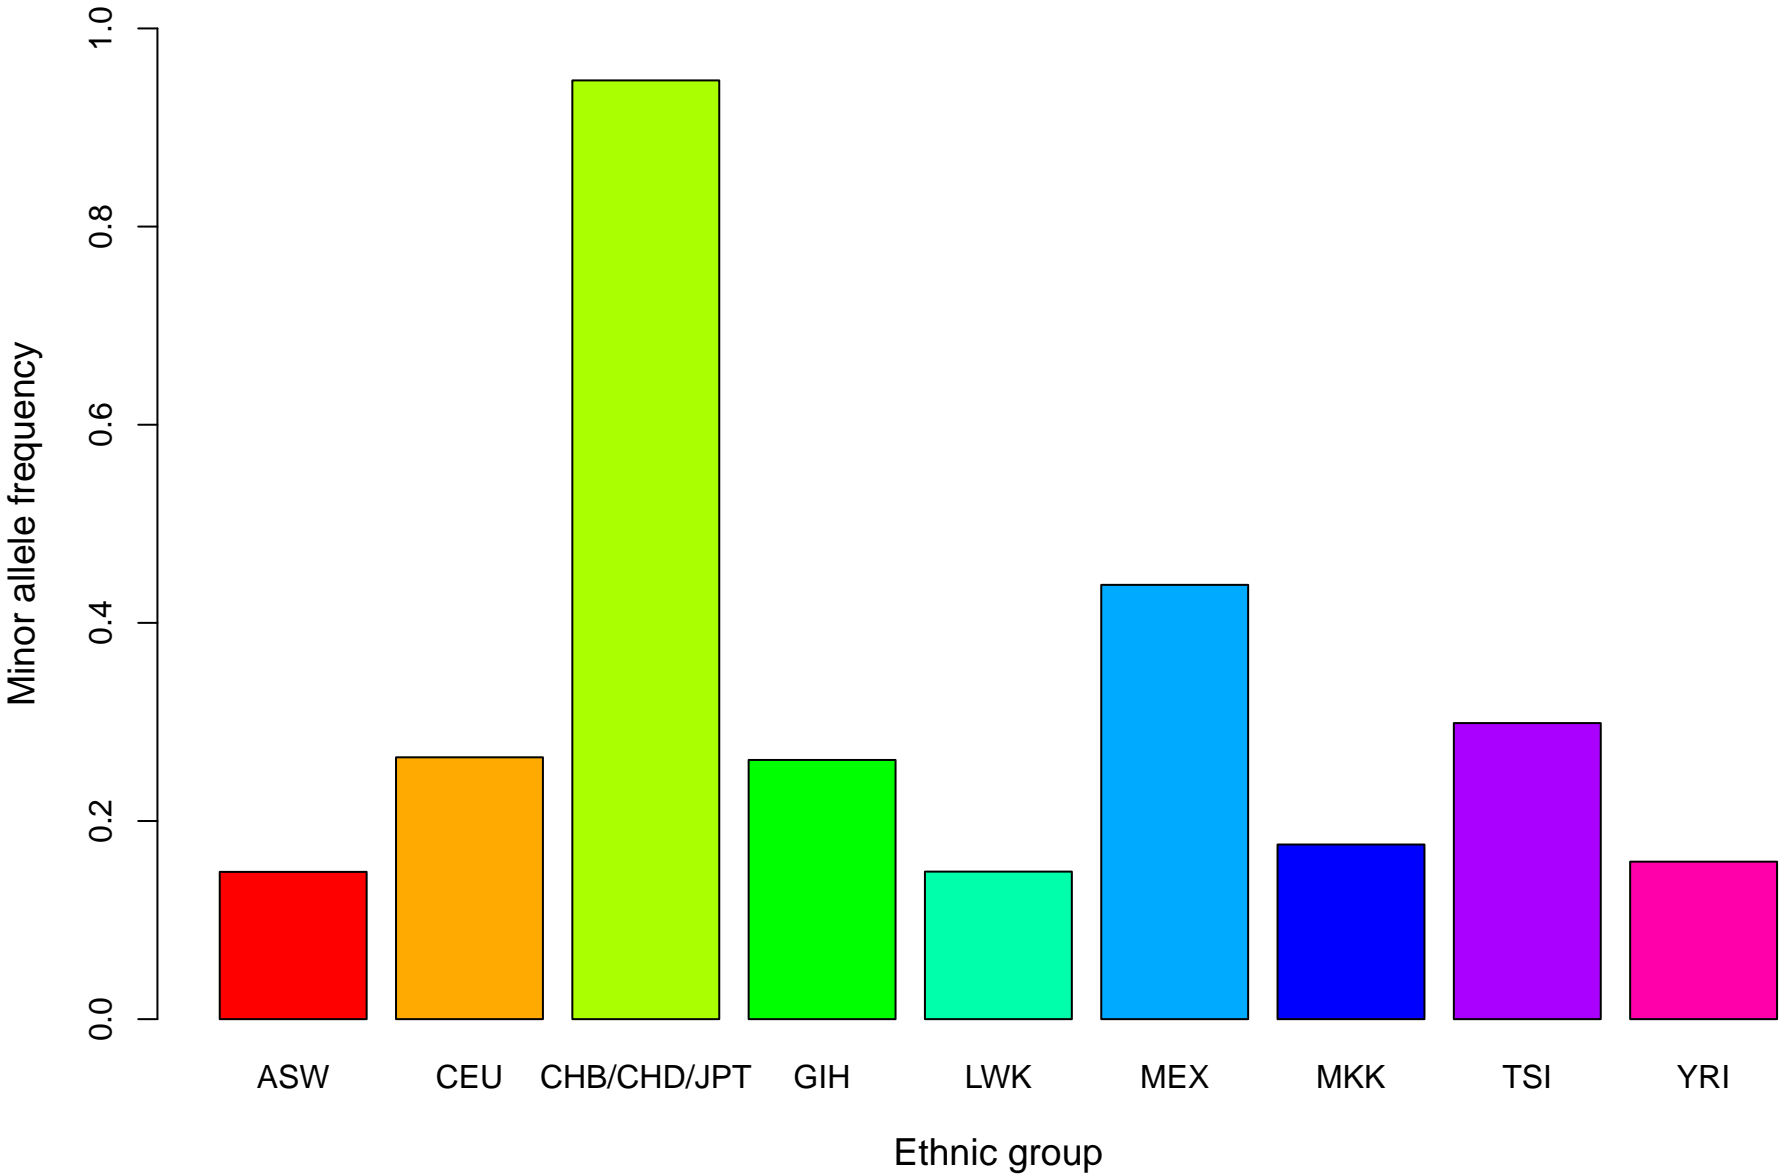

# rs186332\_T

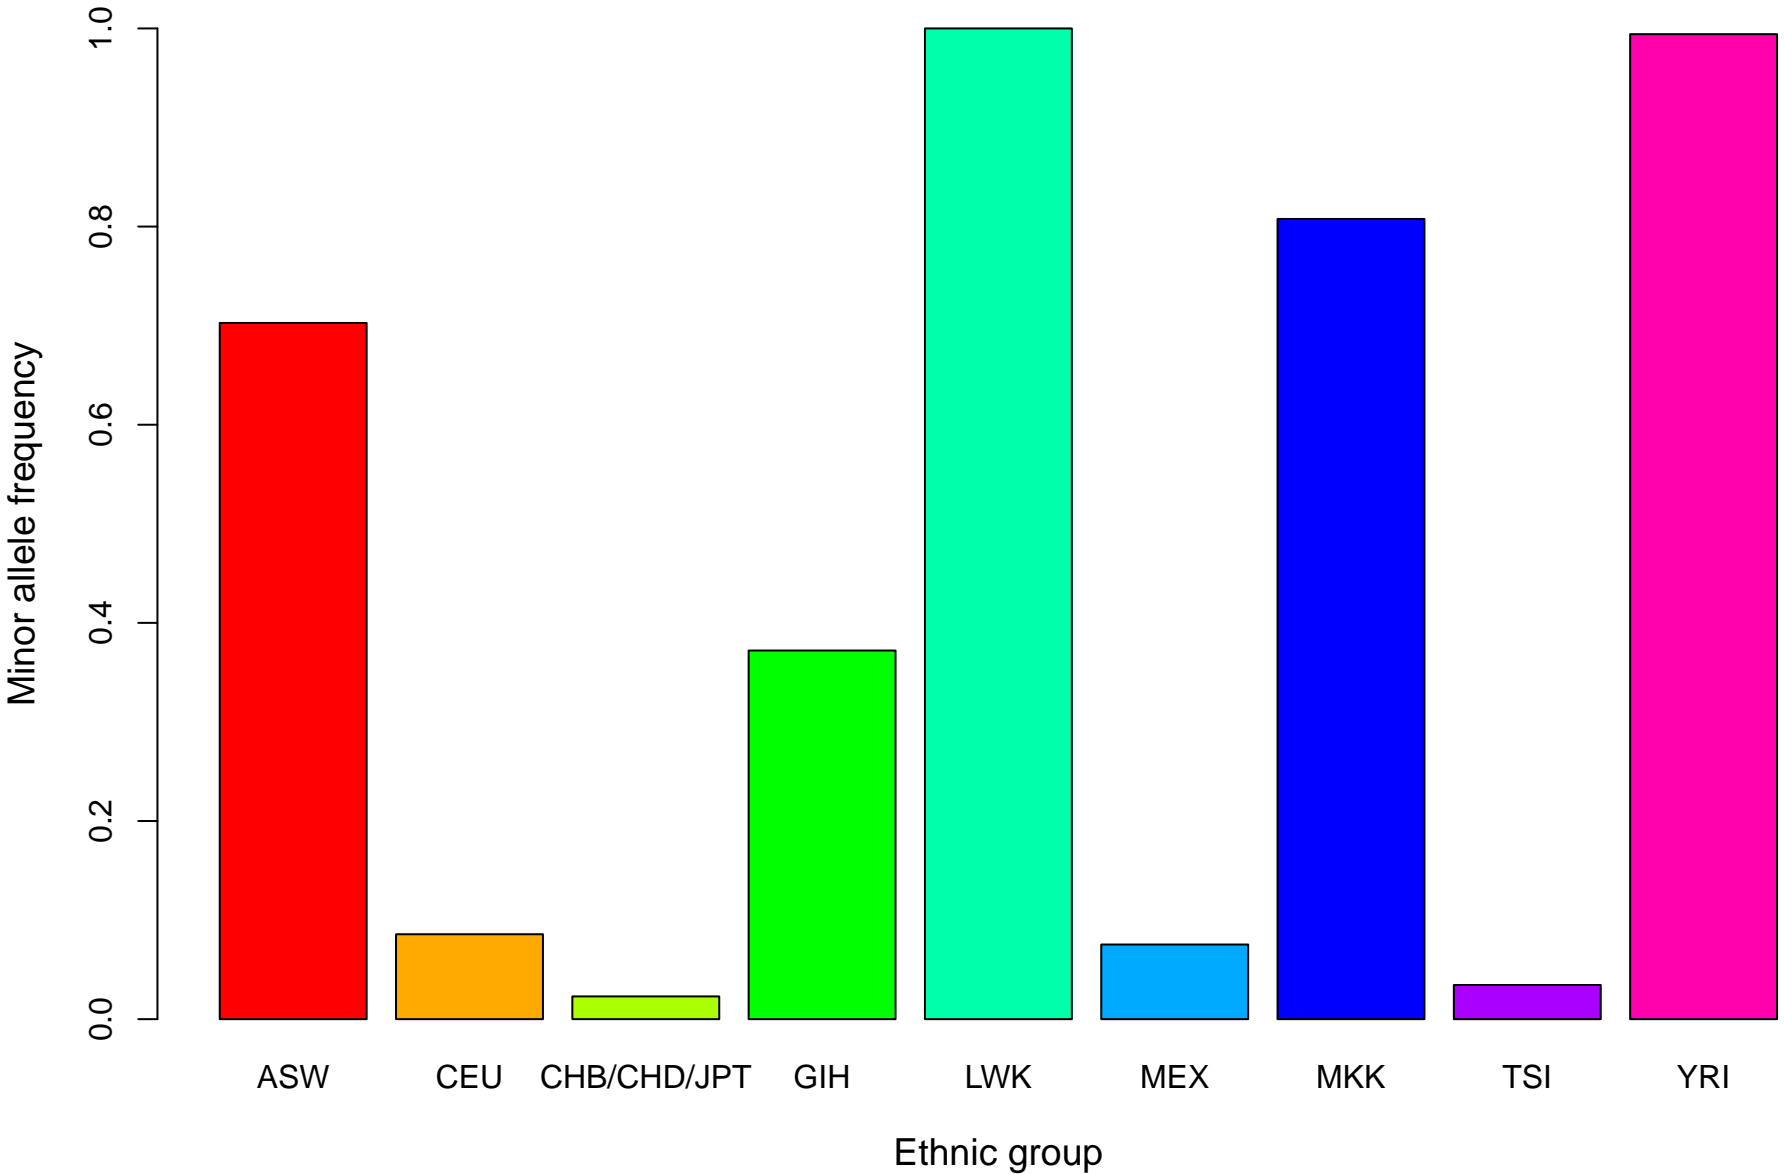

# rs13159076\_G

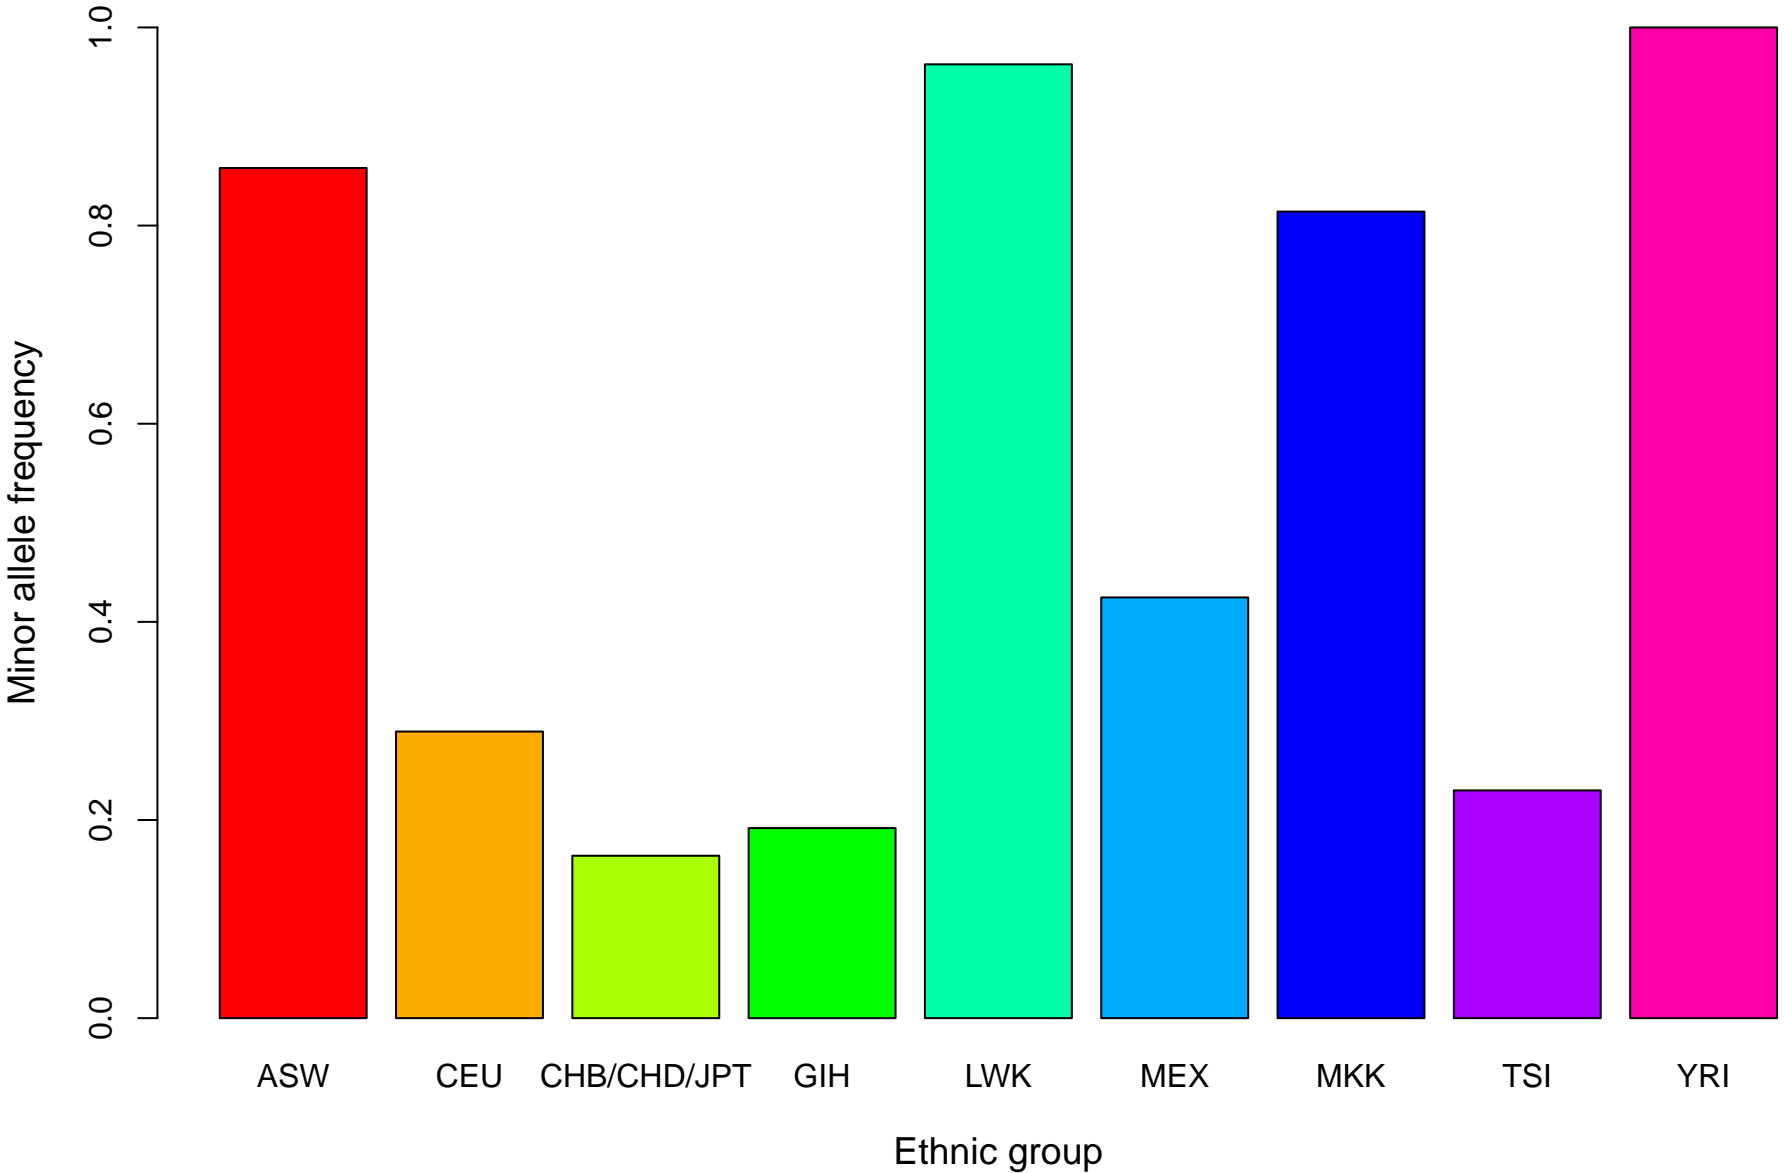

# rs12618959\_A

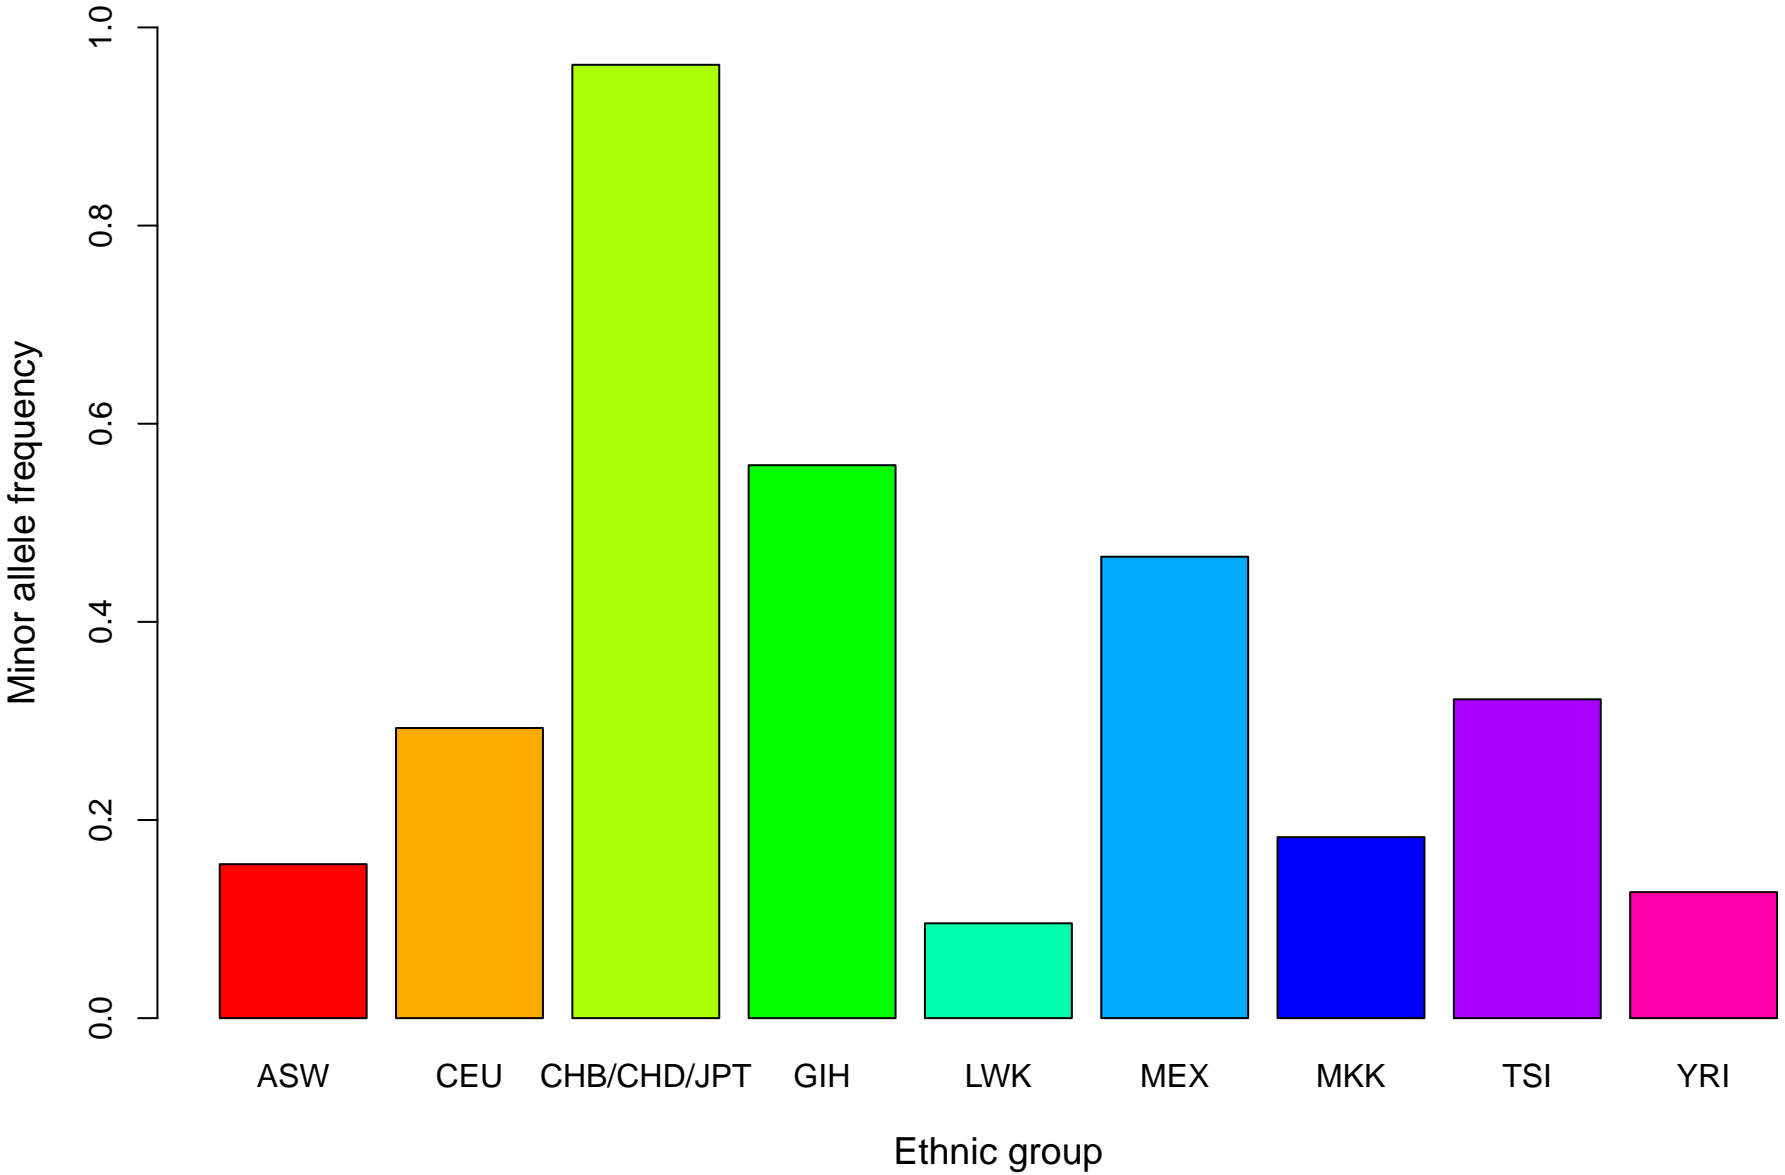

# rs2622351\_C

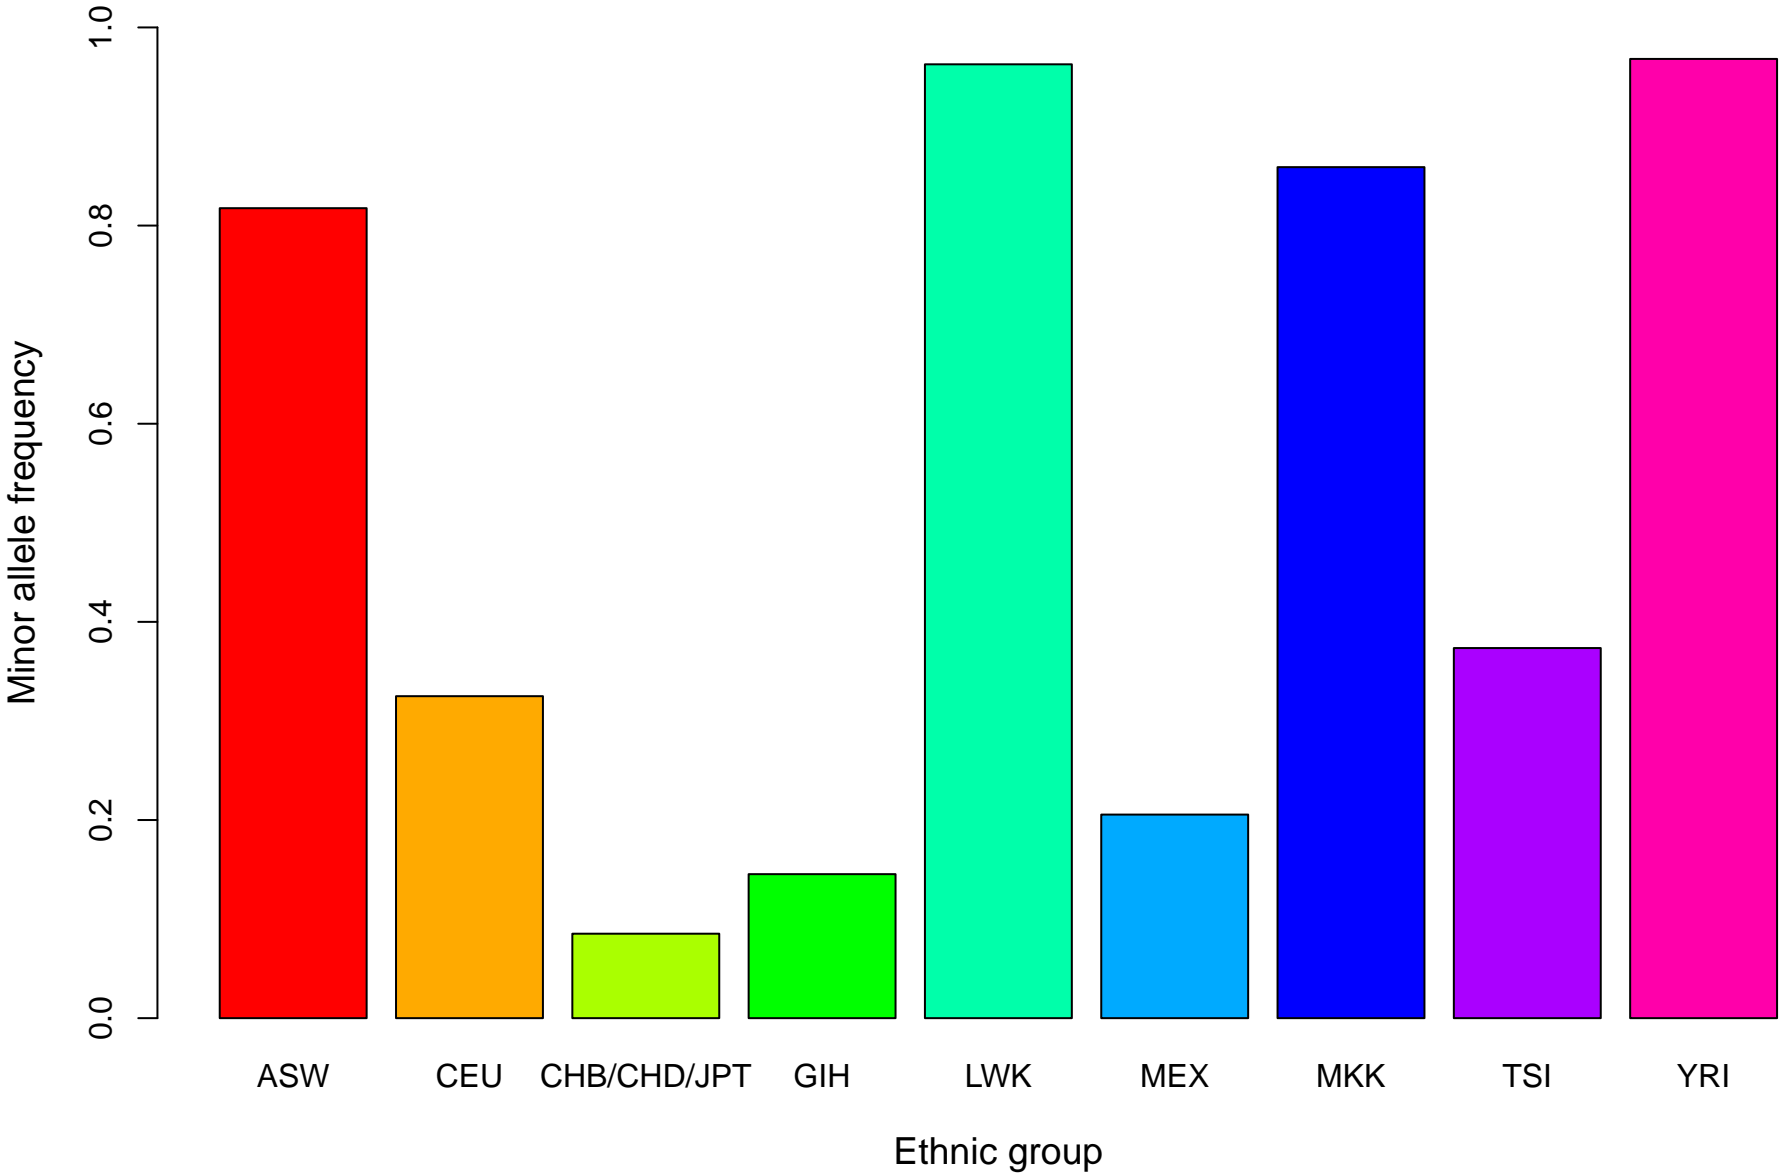

# rs4646450\_G

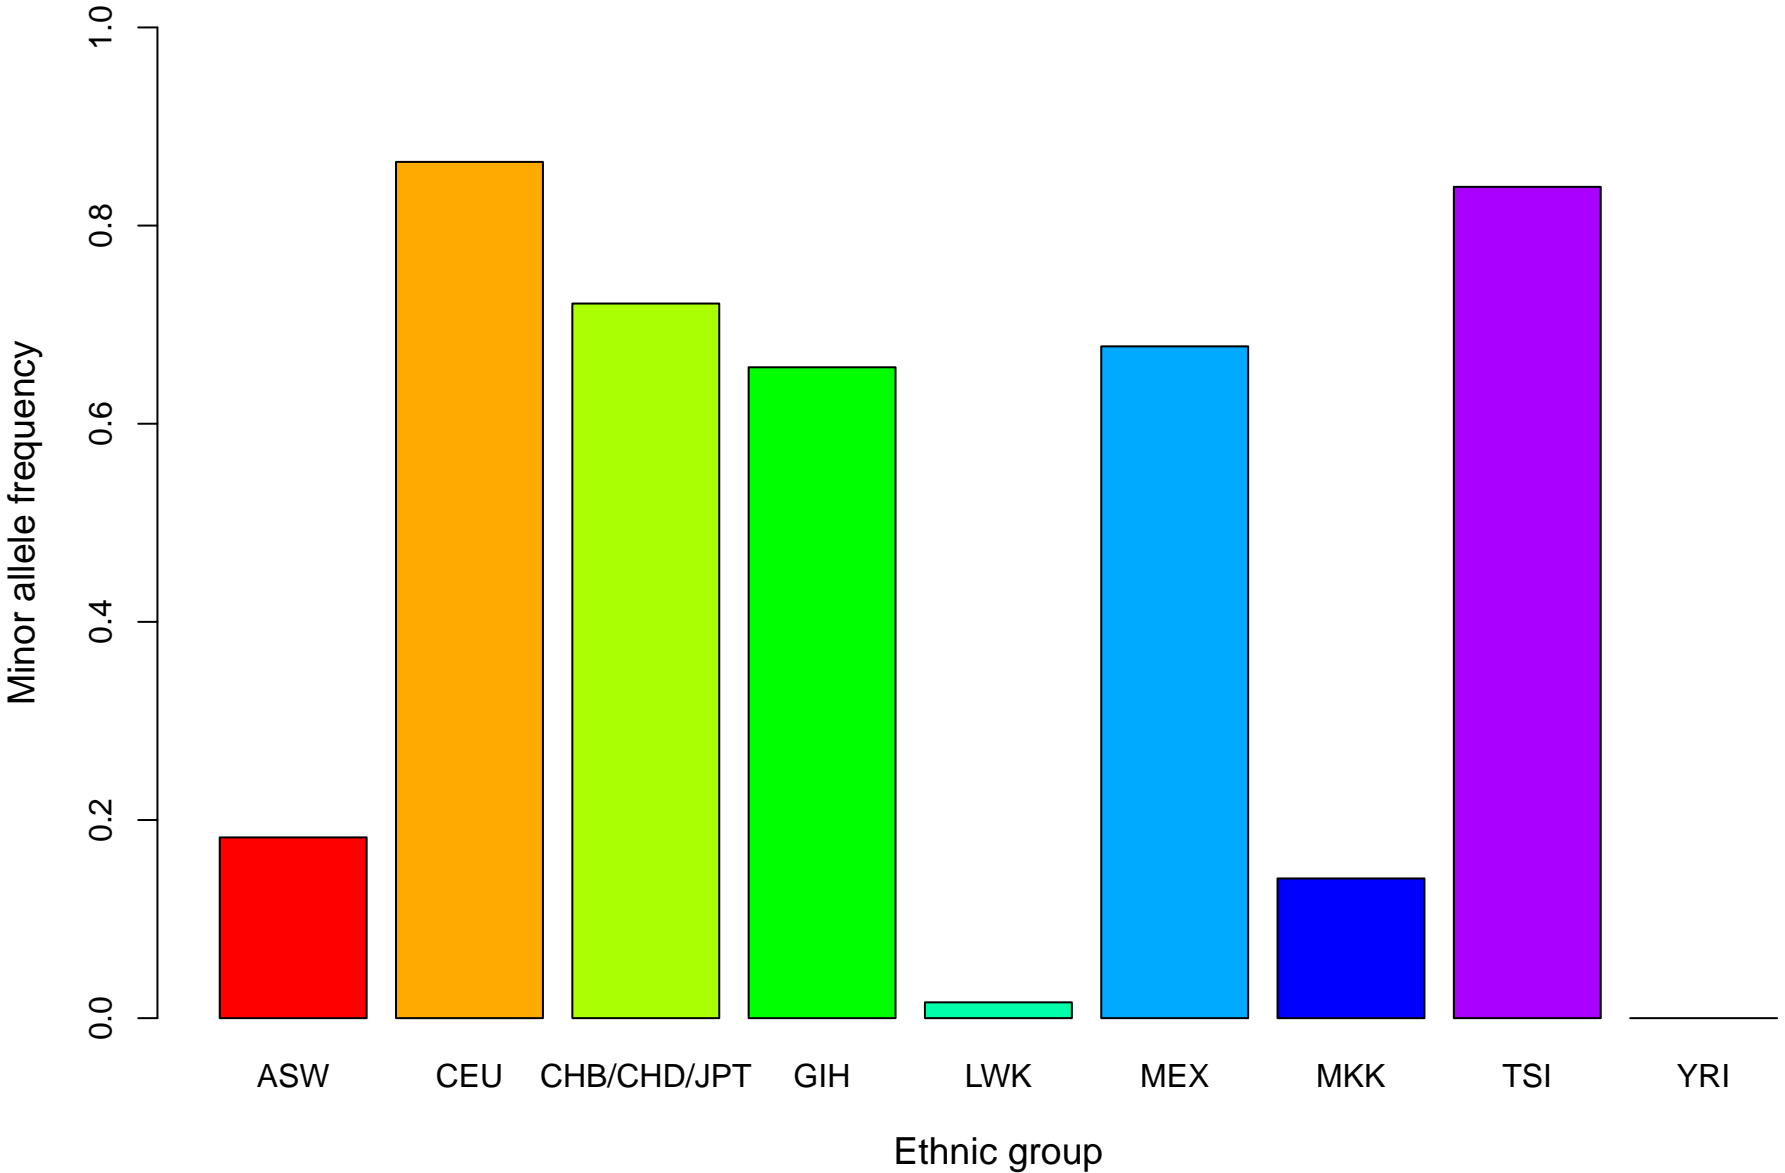

# rs8020454\_C

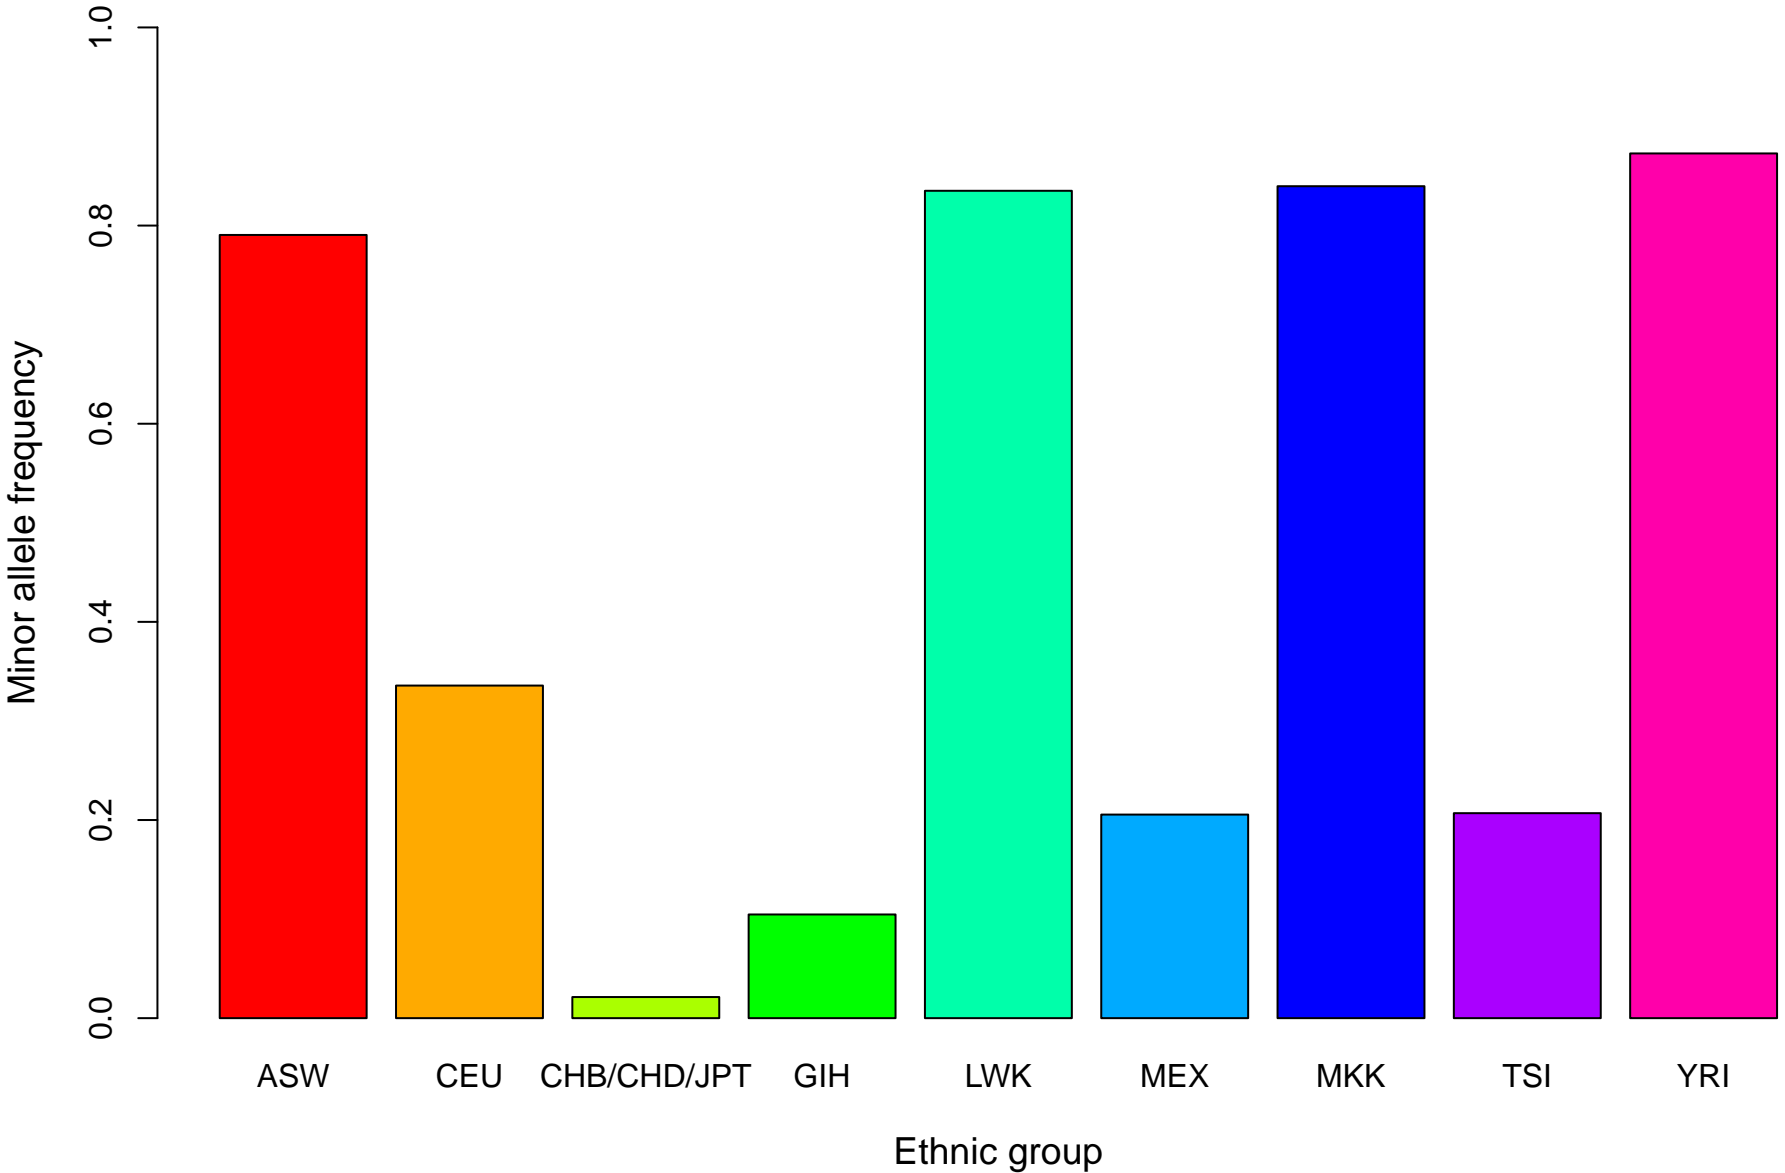

# rs652951\_A

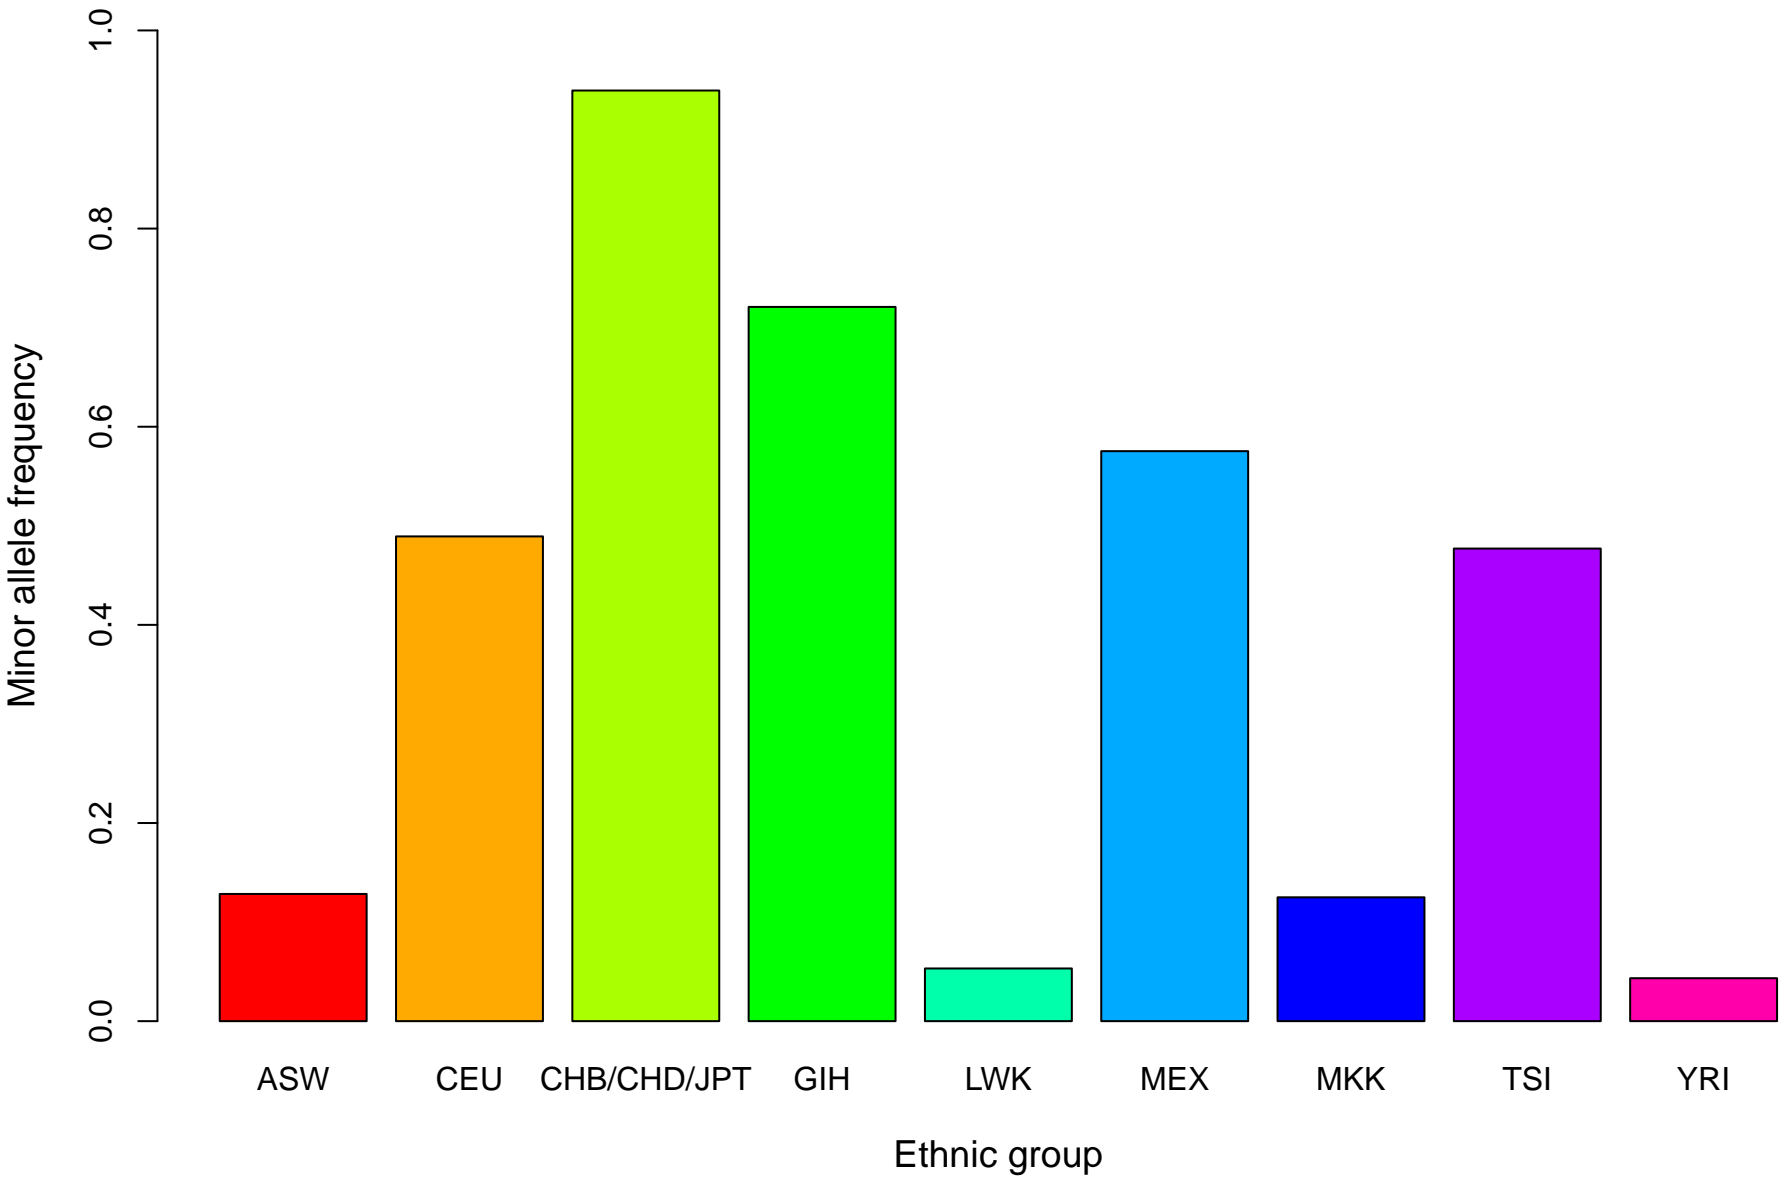



# rs2823623\_A

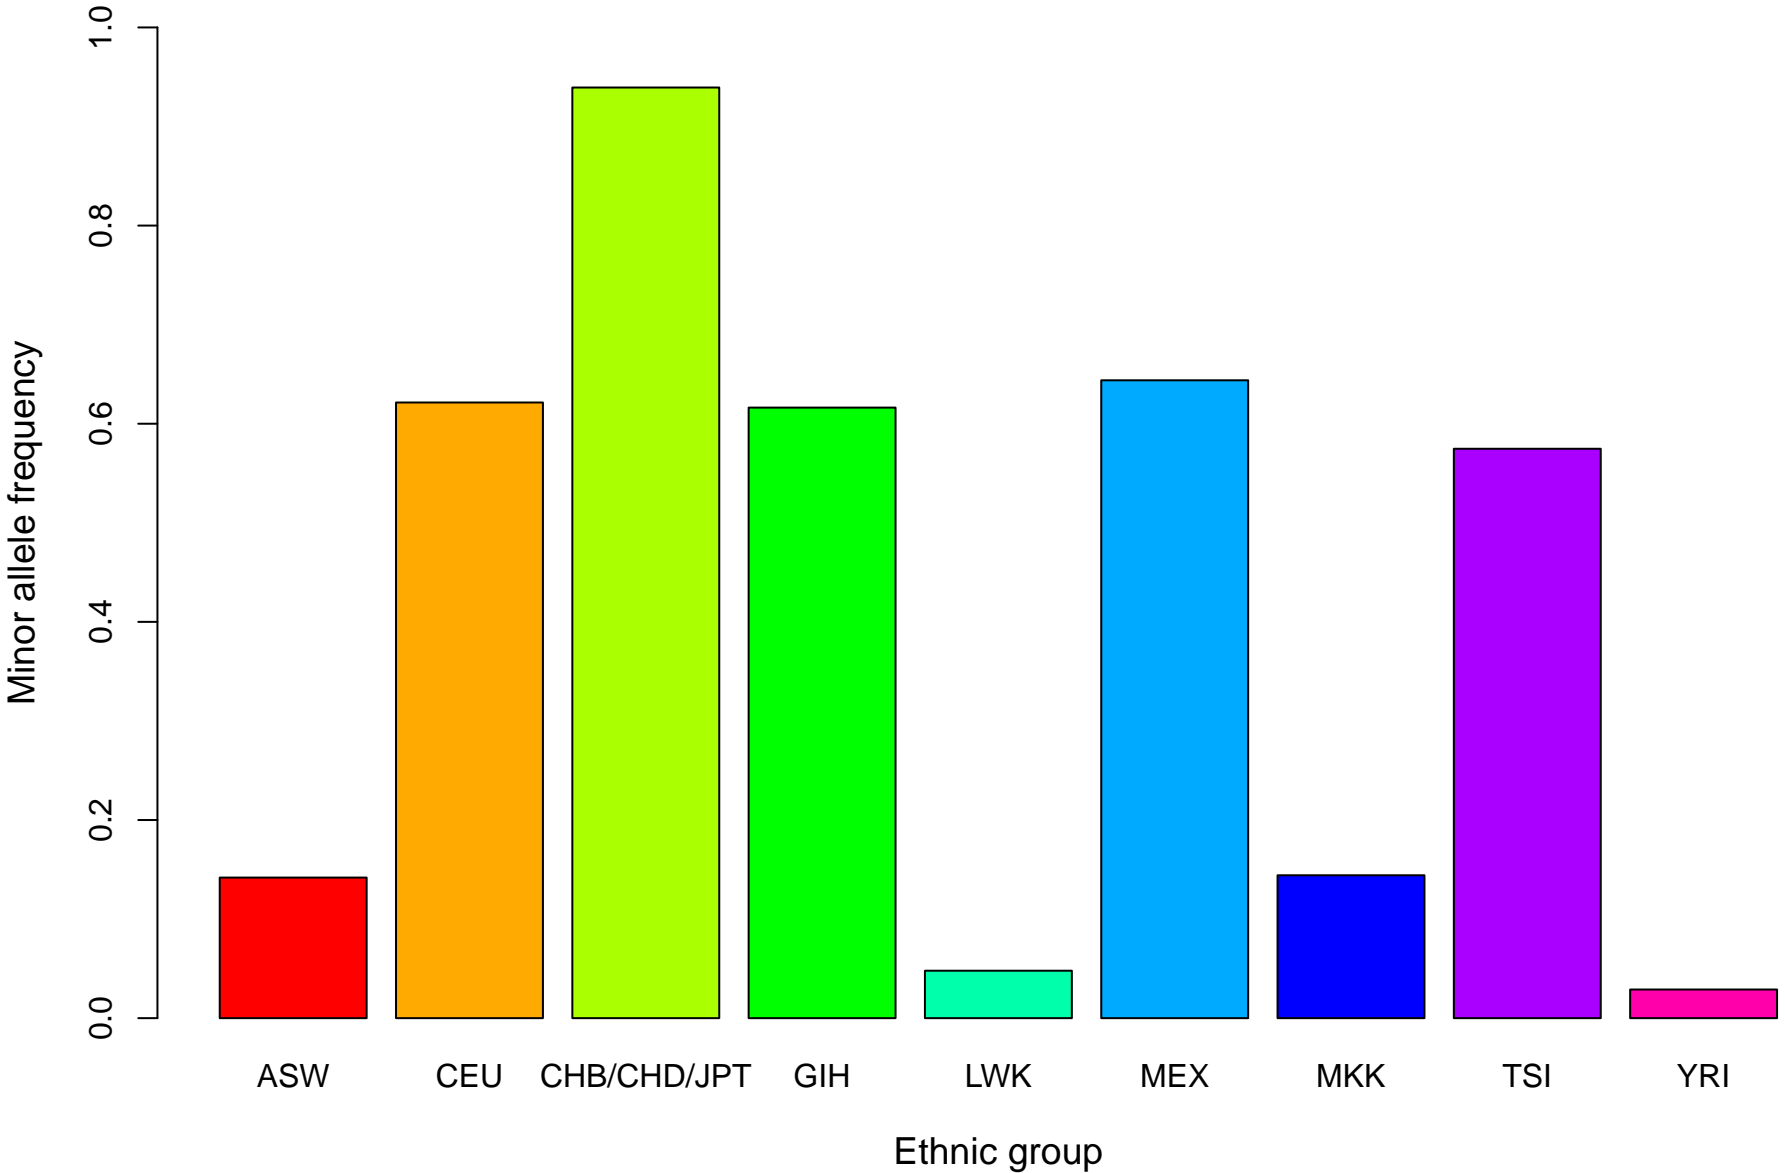

# rs384890\_G

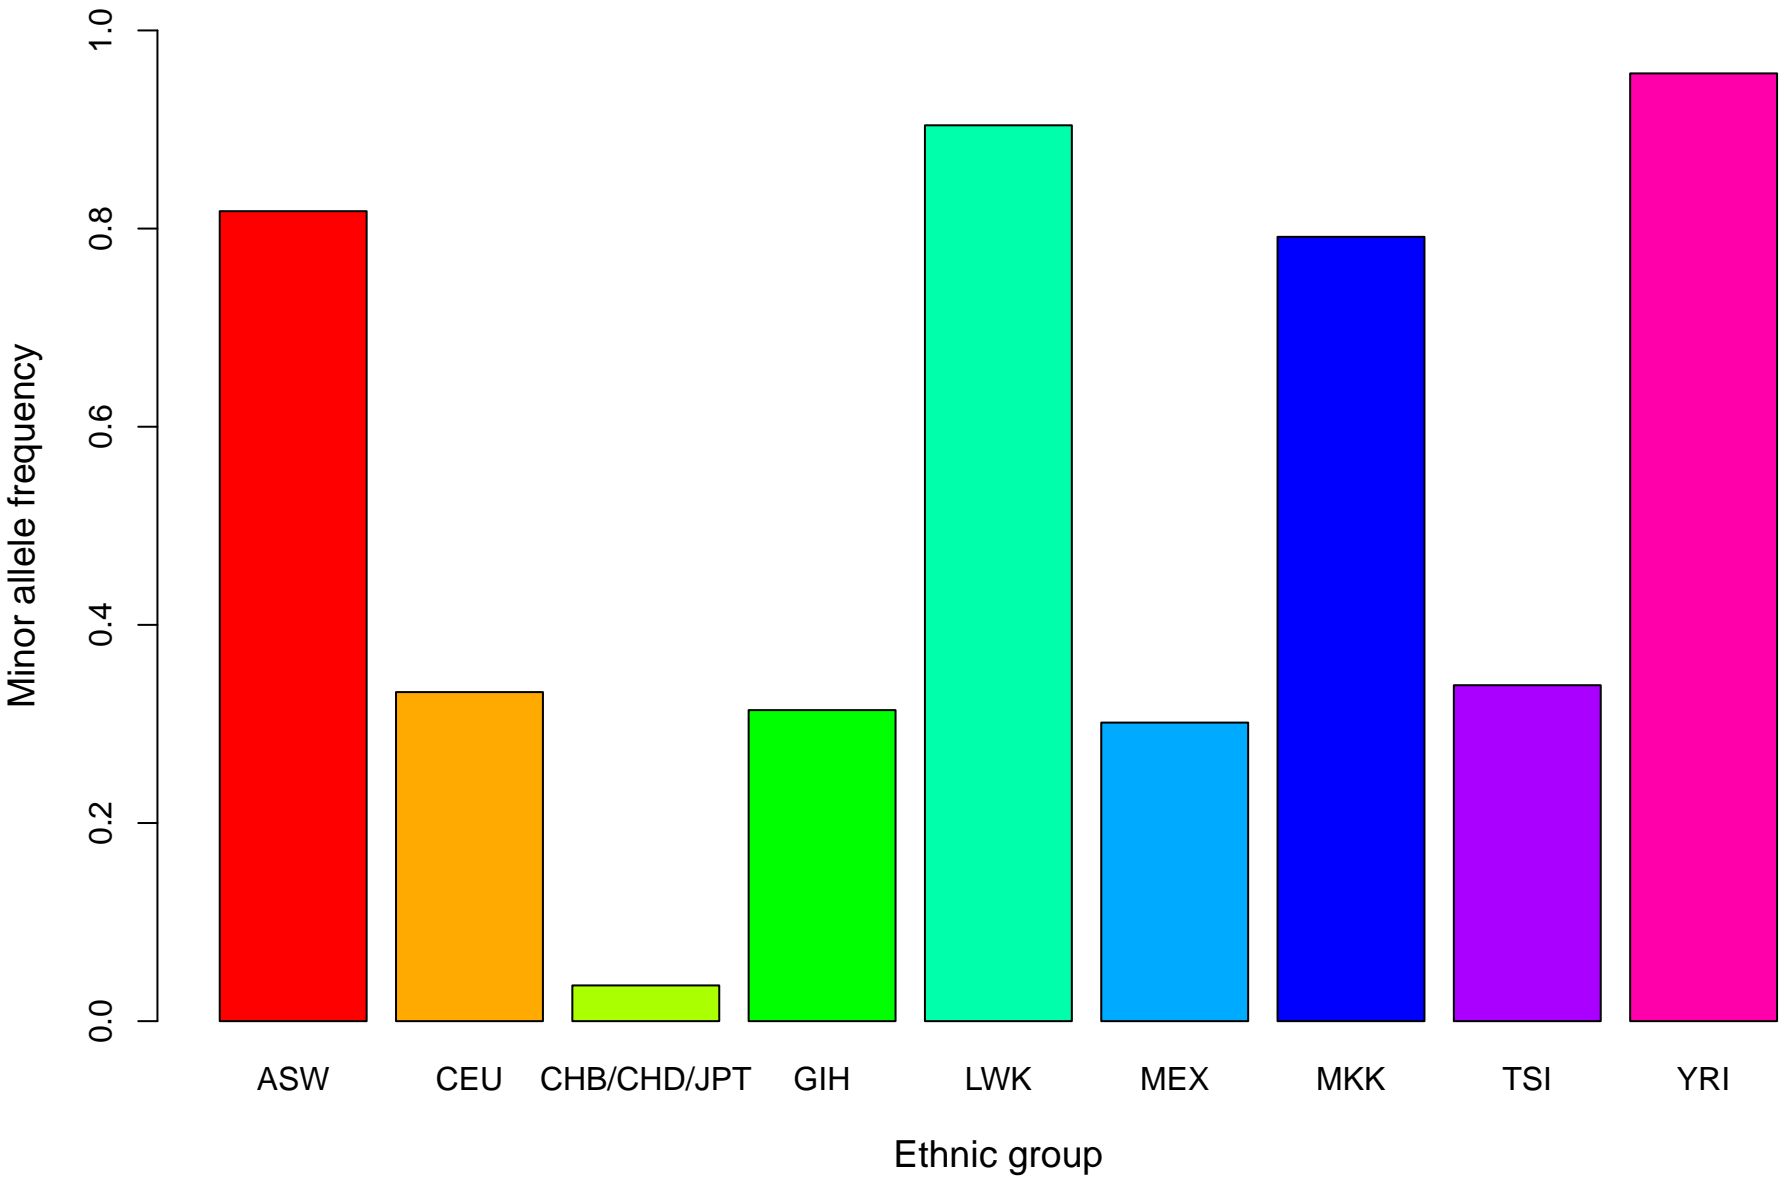

# rs7825690\_T

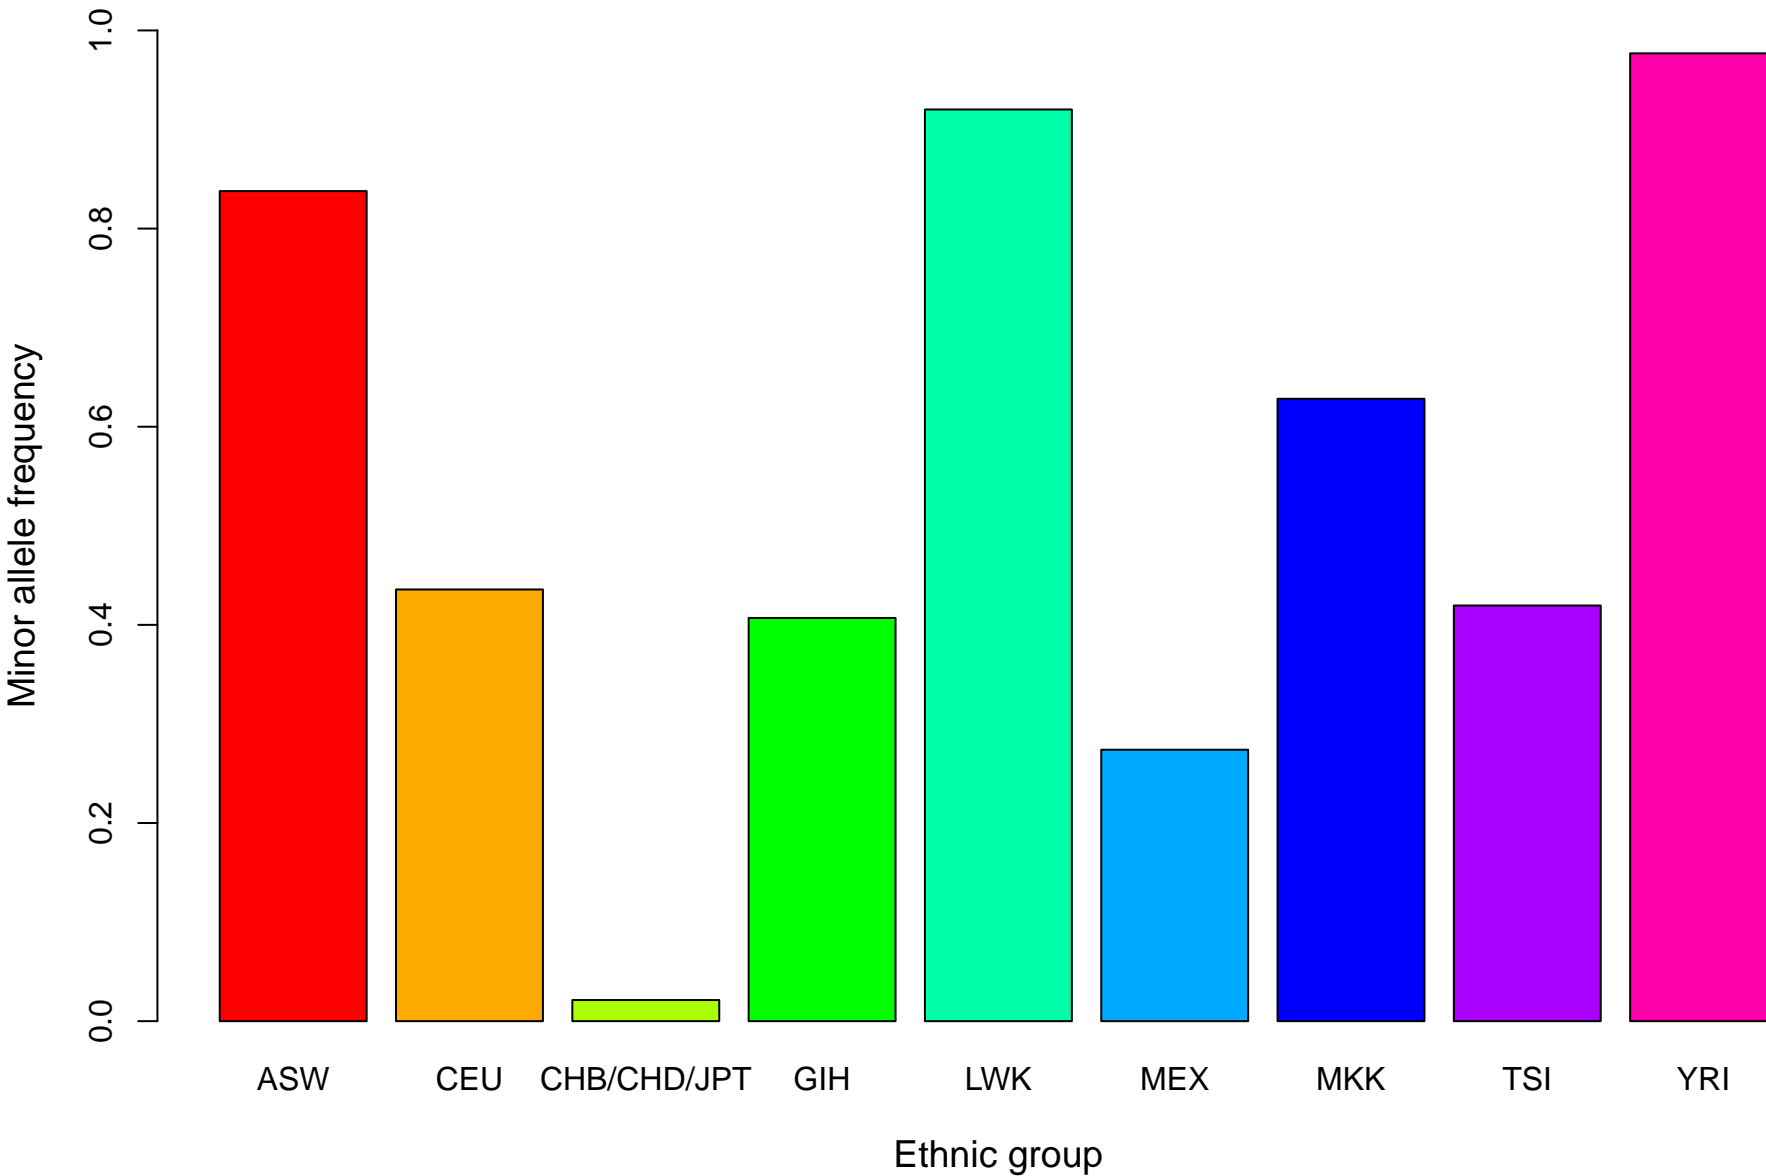

# rs810066\_T

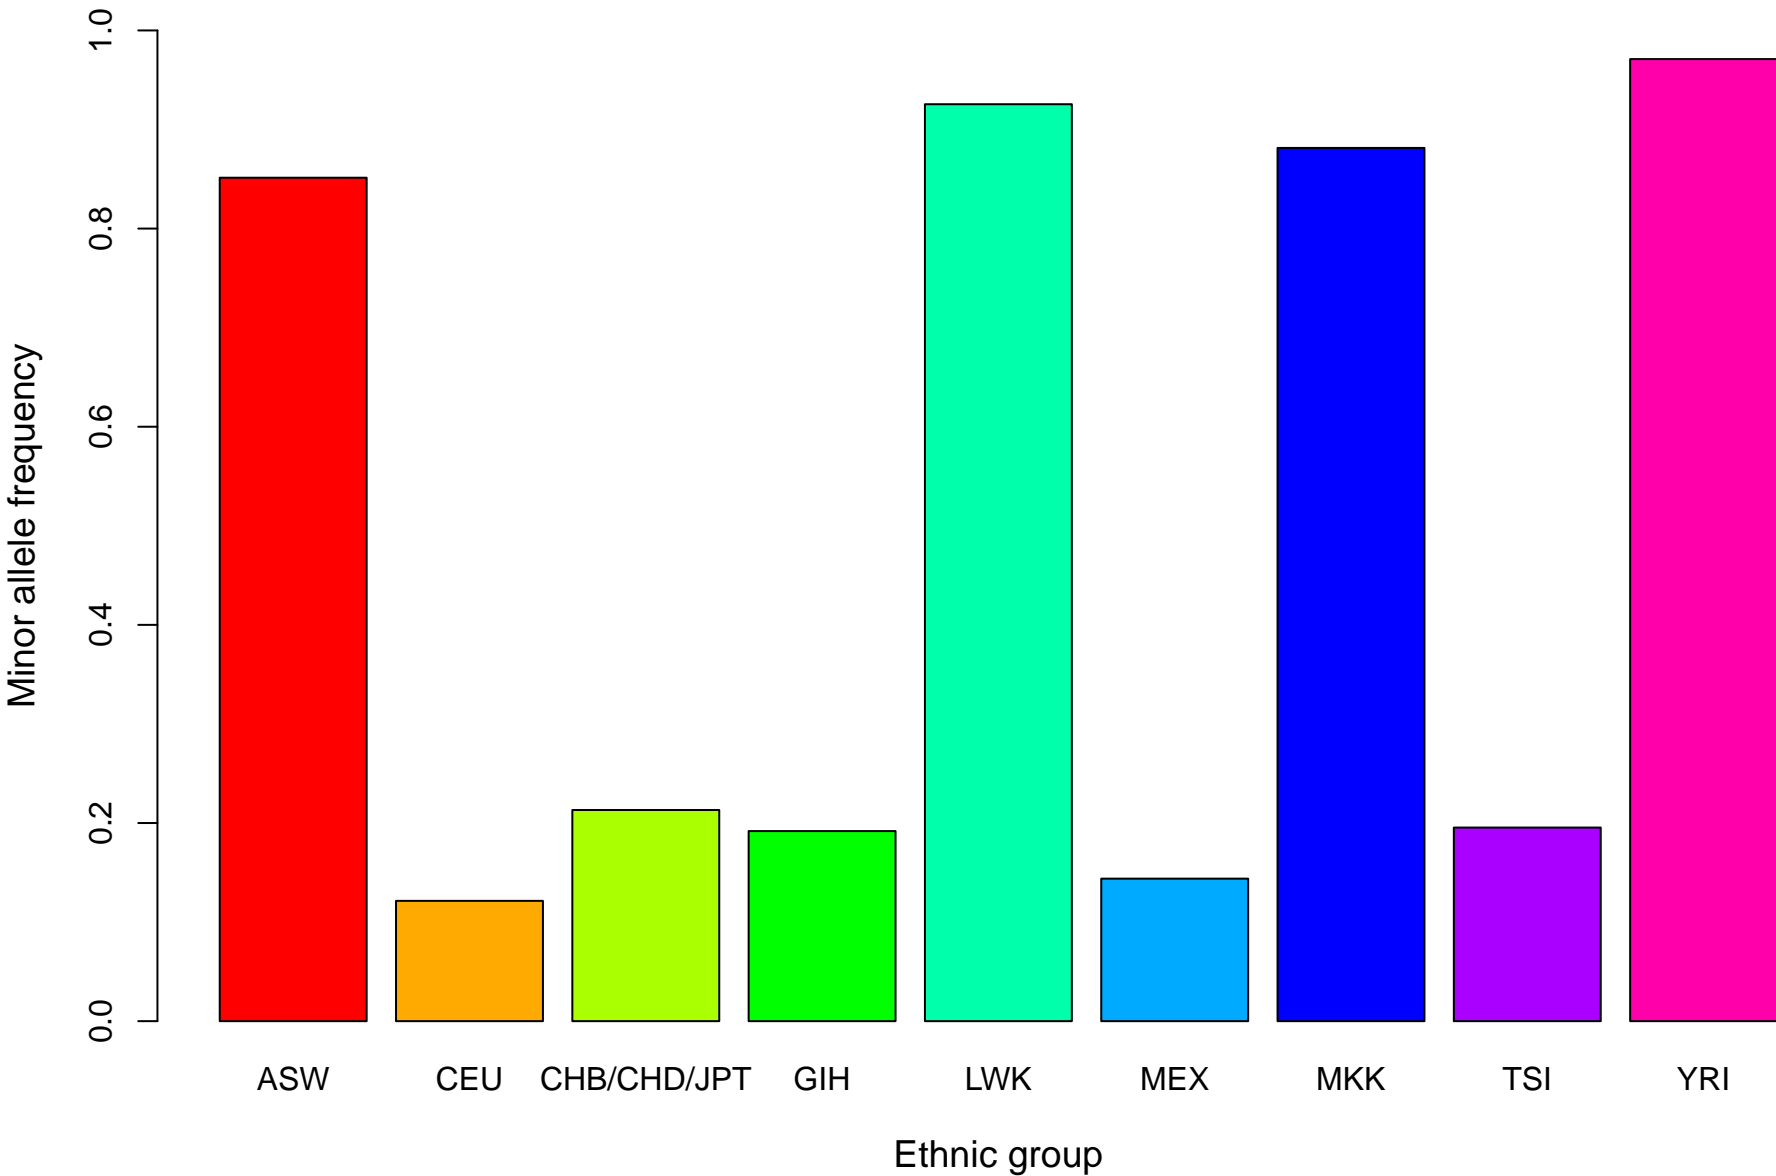

# rs6472114\_T

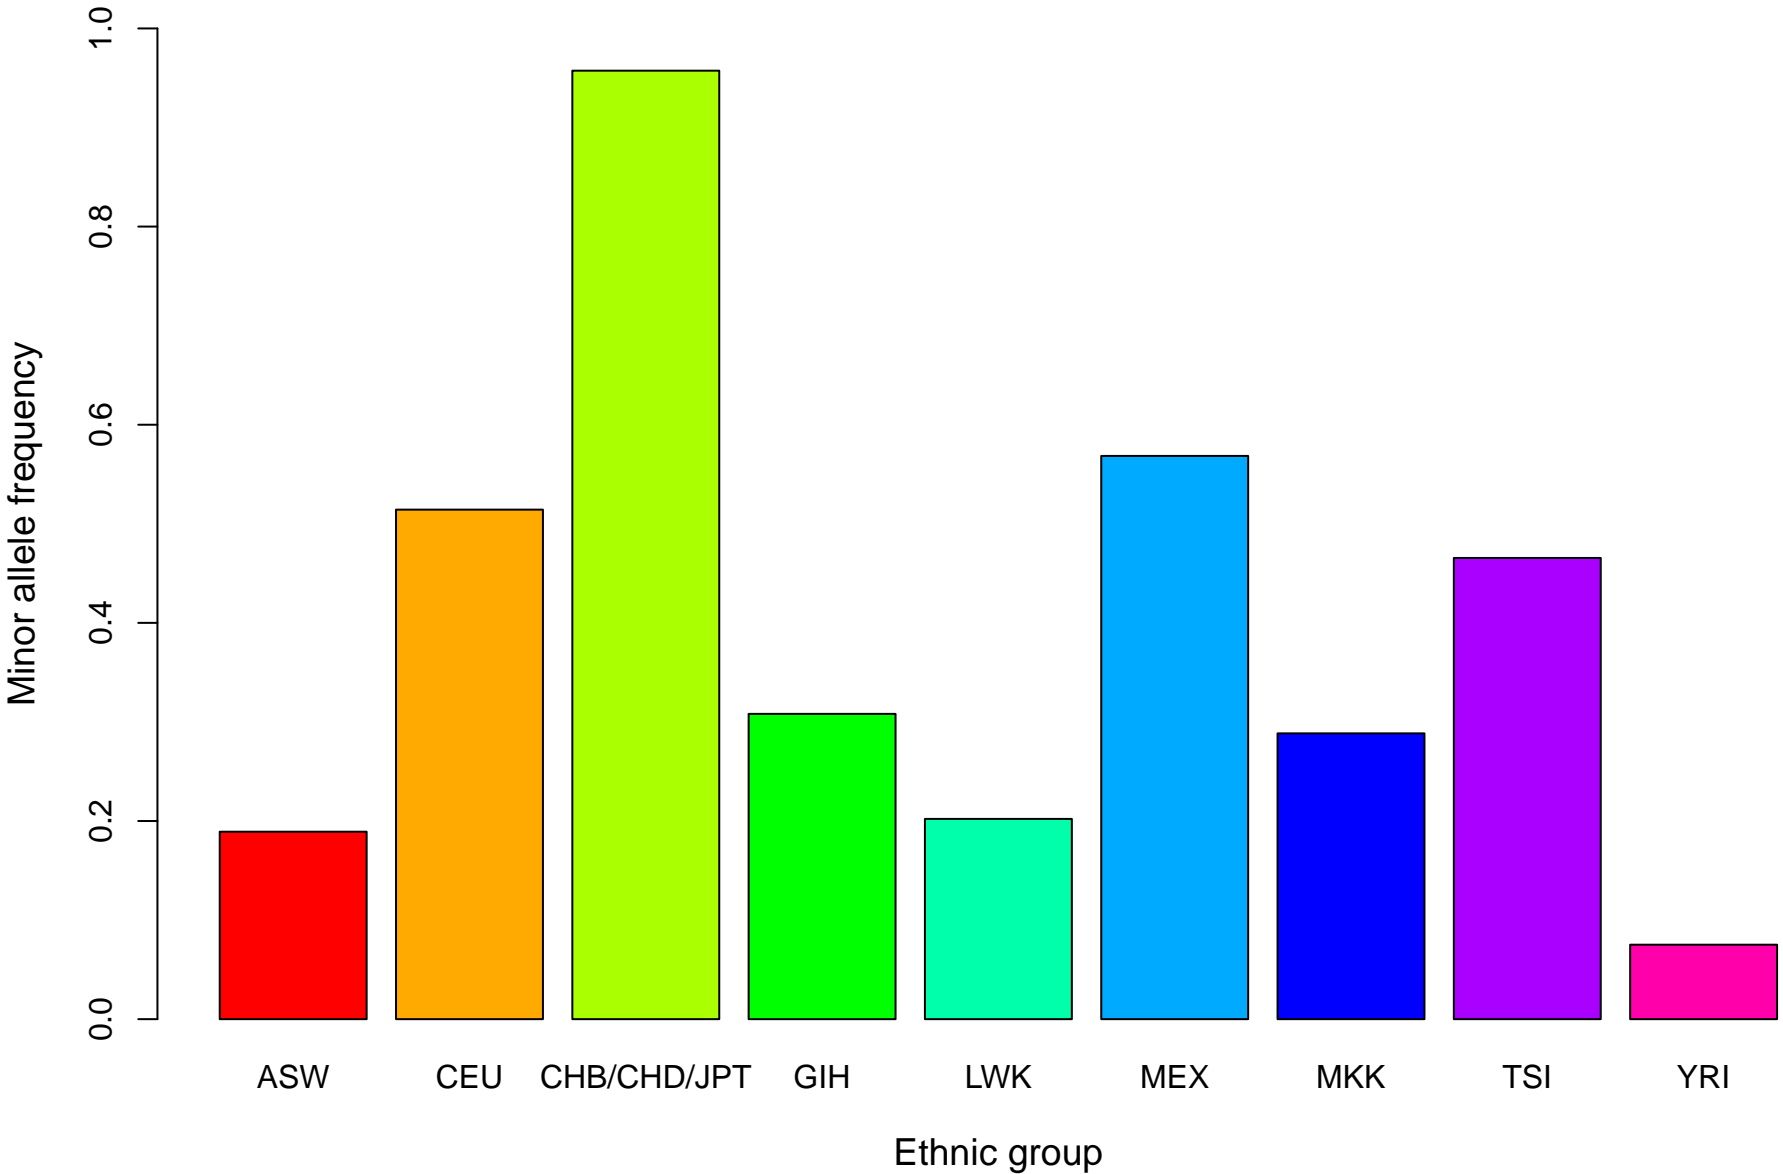

# rs10071261\_T

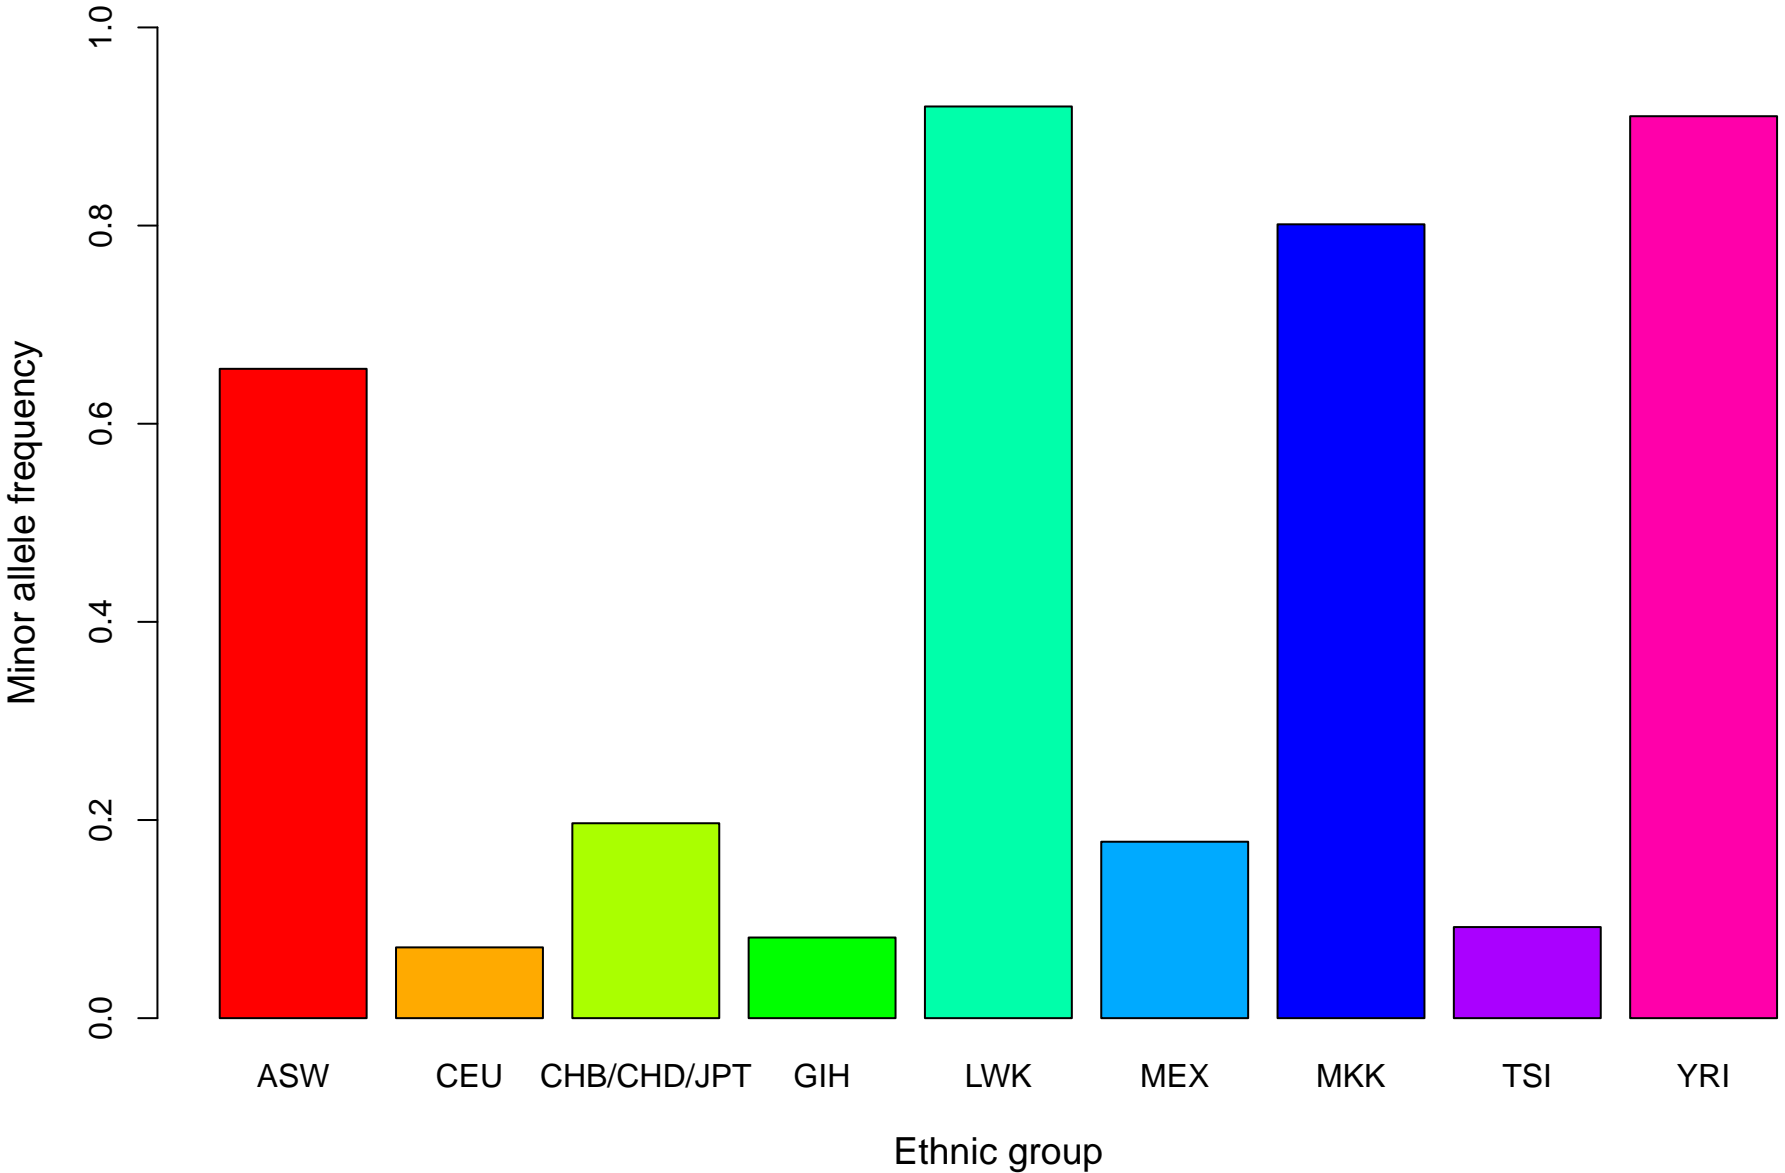

# rs1550326\_G

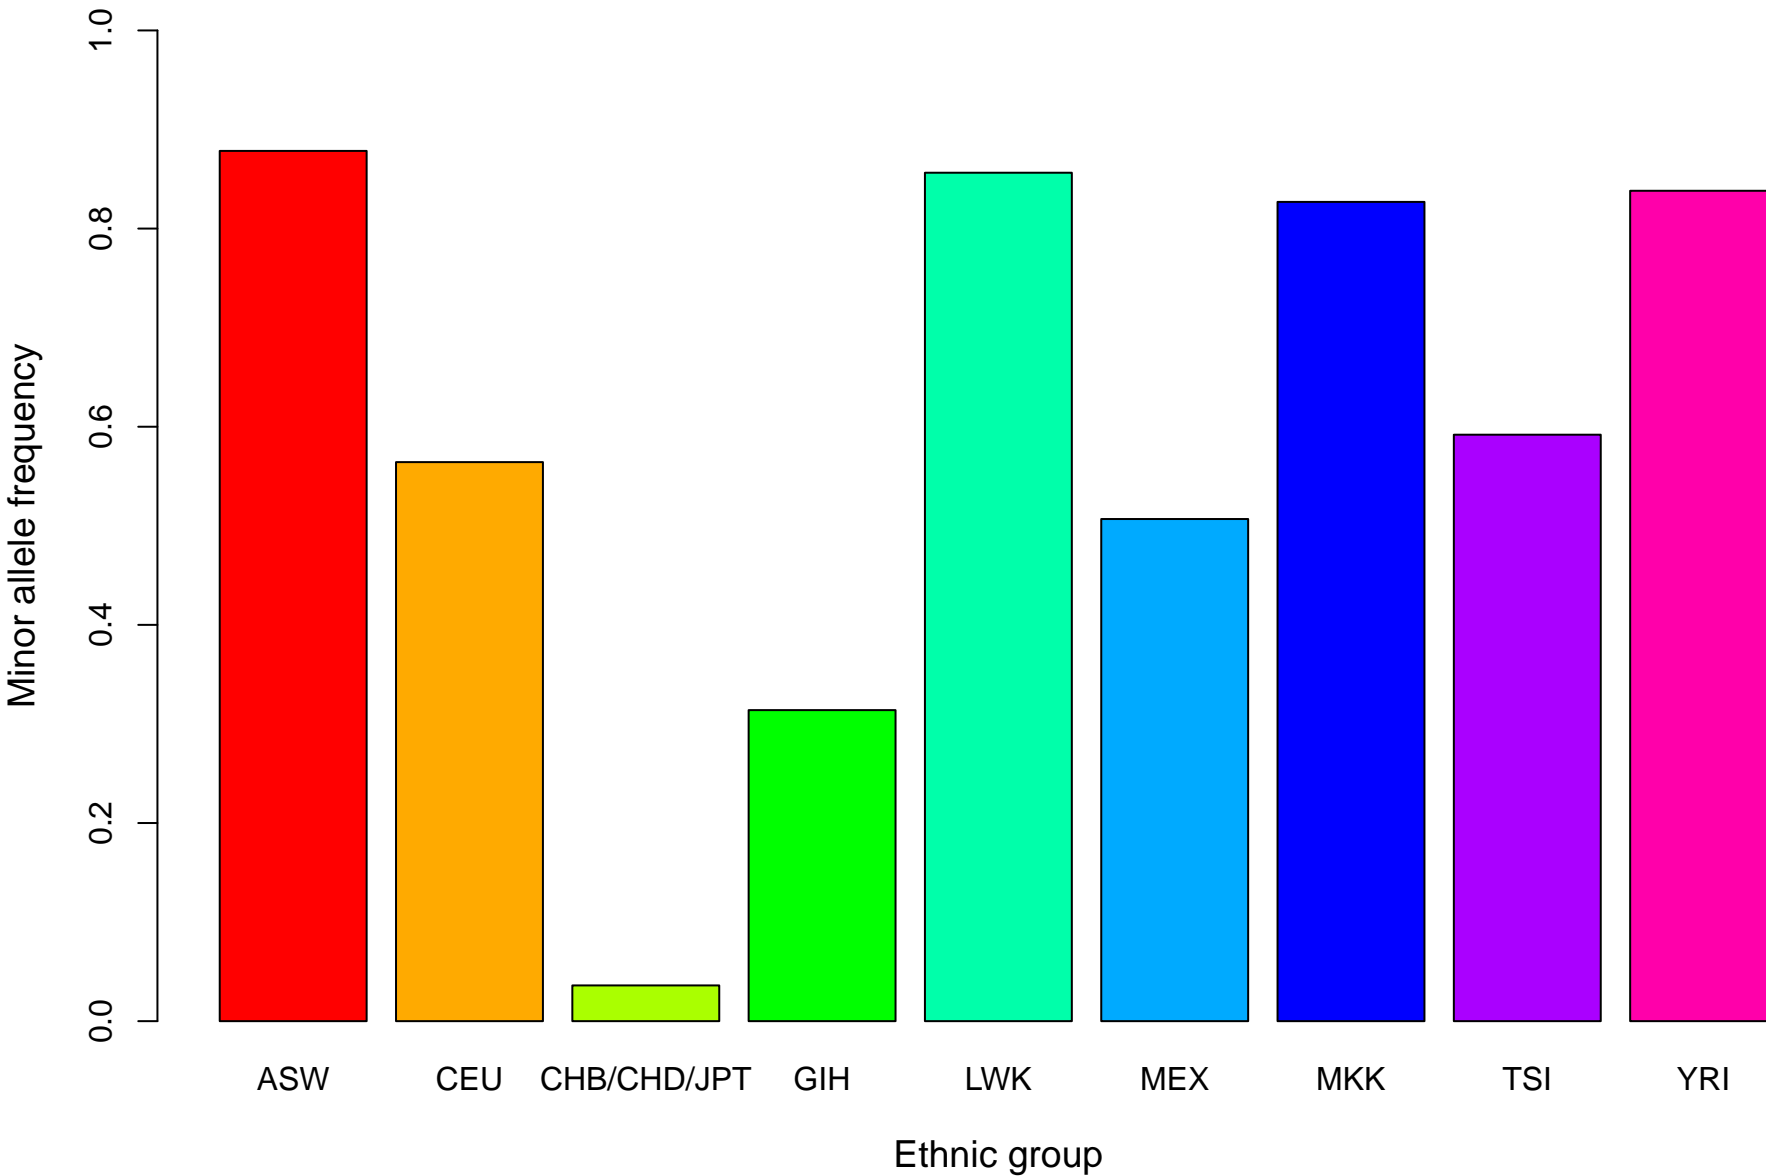

# rs6427488\_C

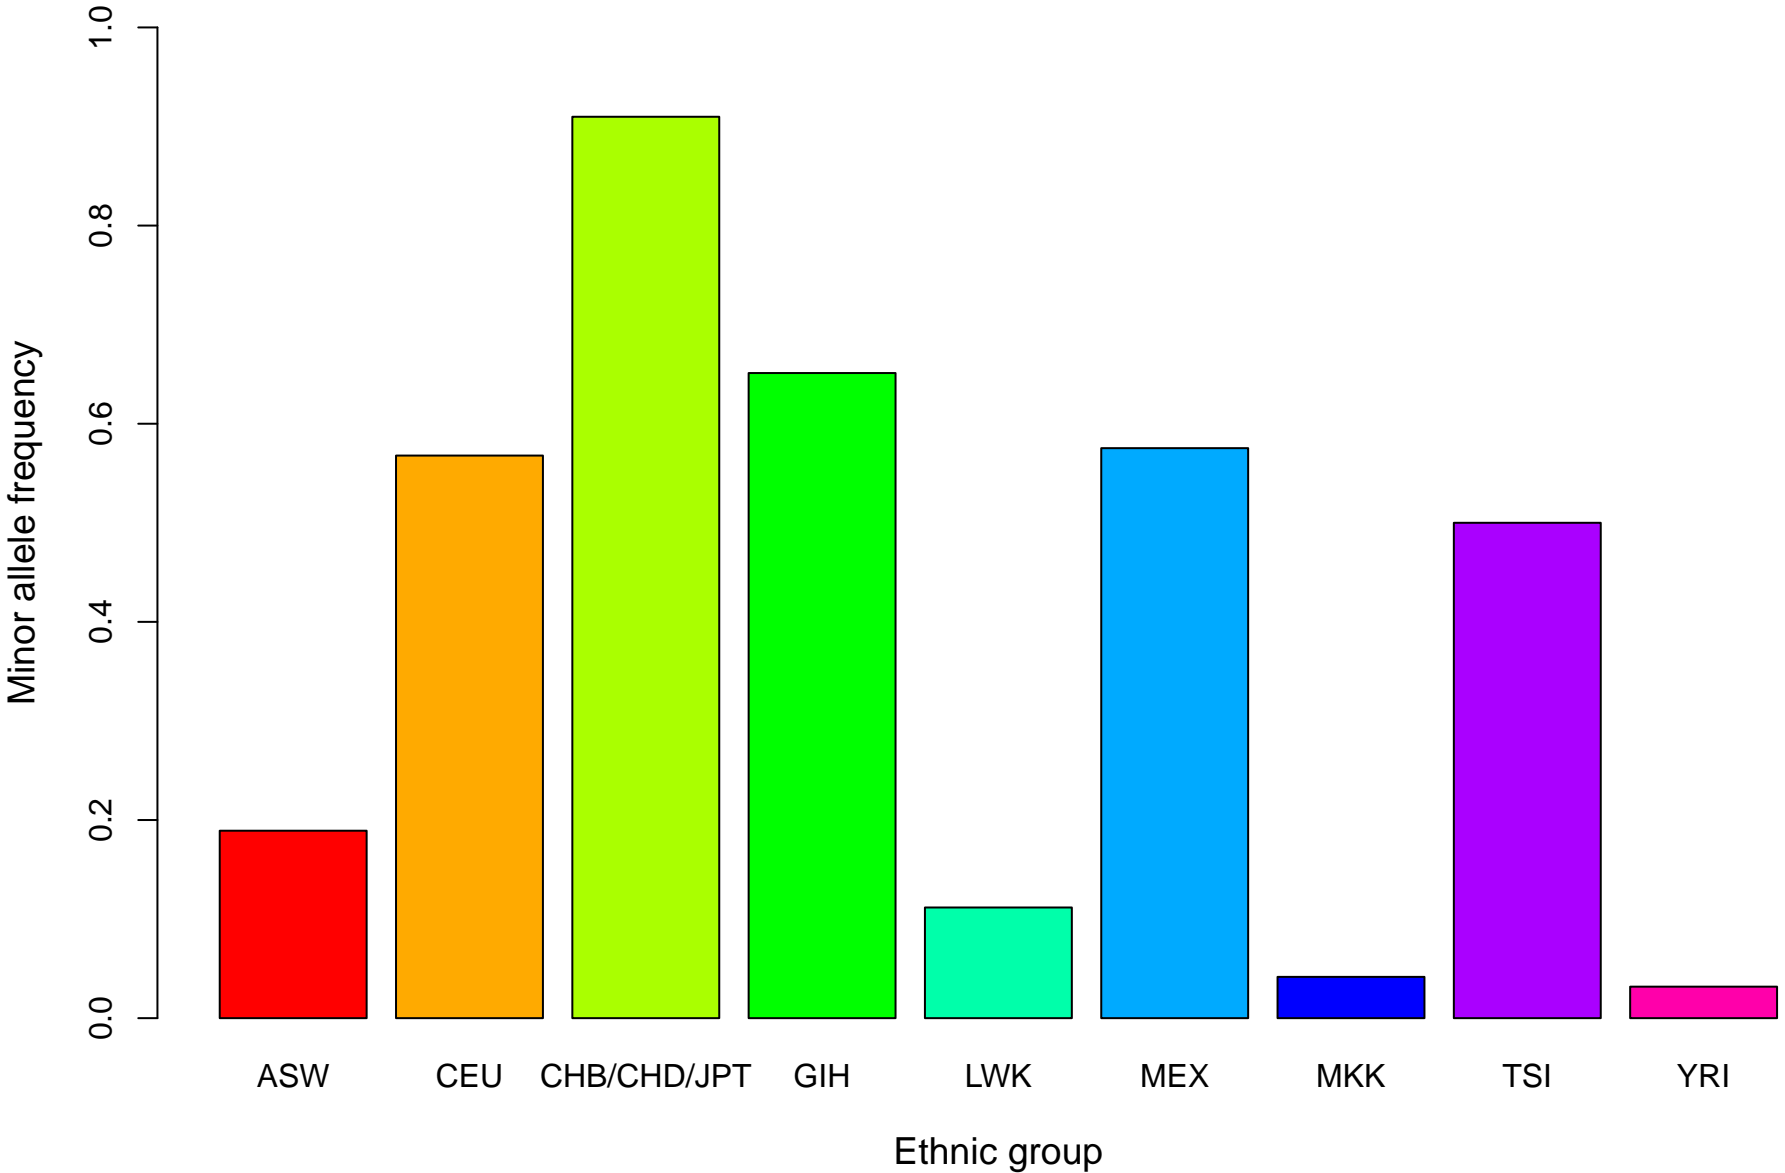



# rs1790116\_G

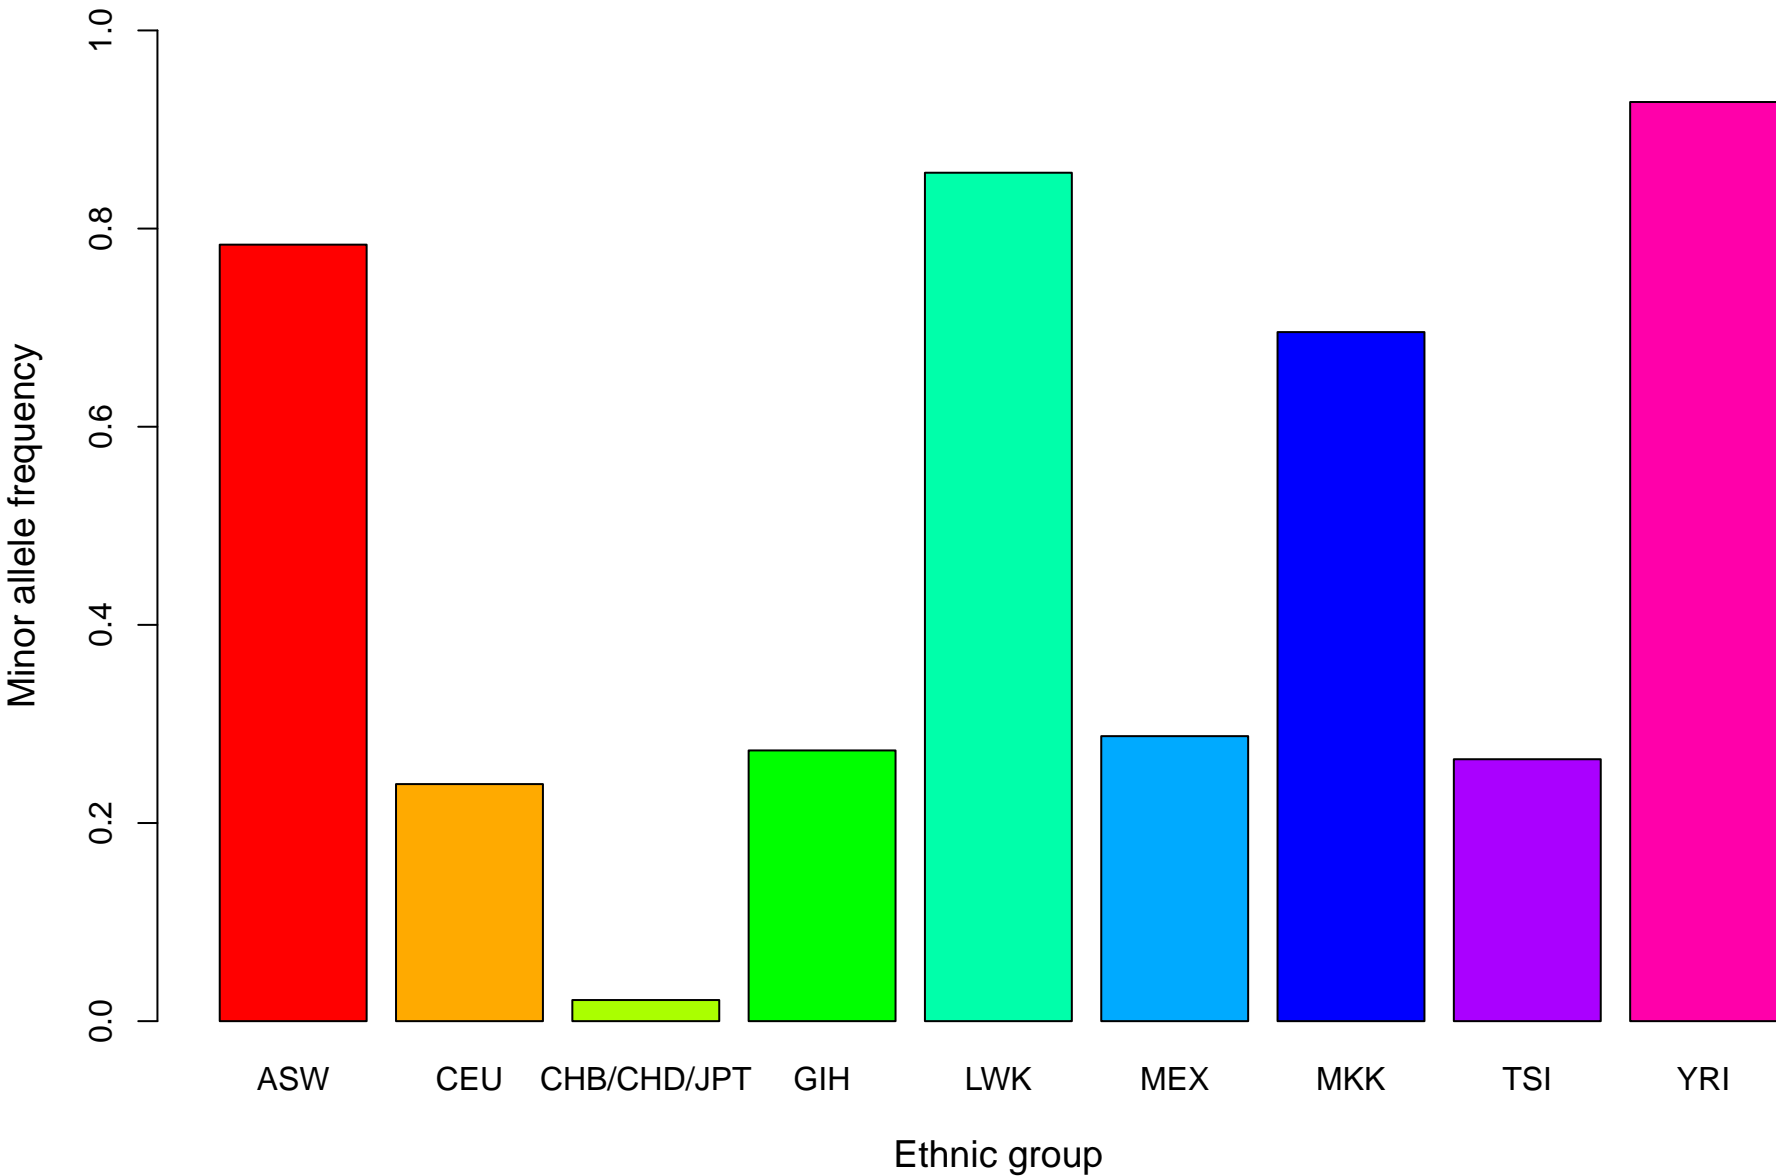

# rs590616\_A

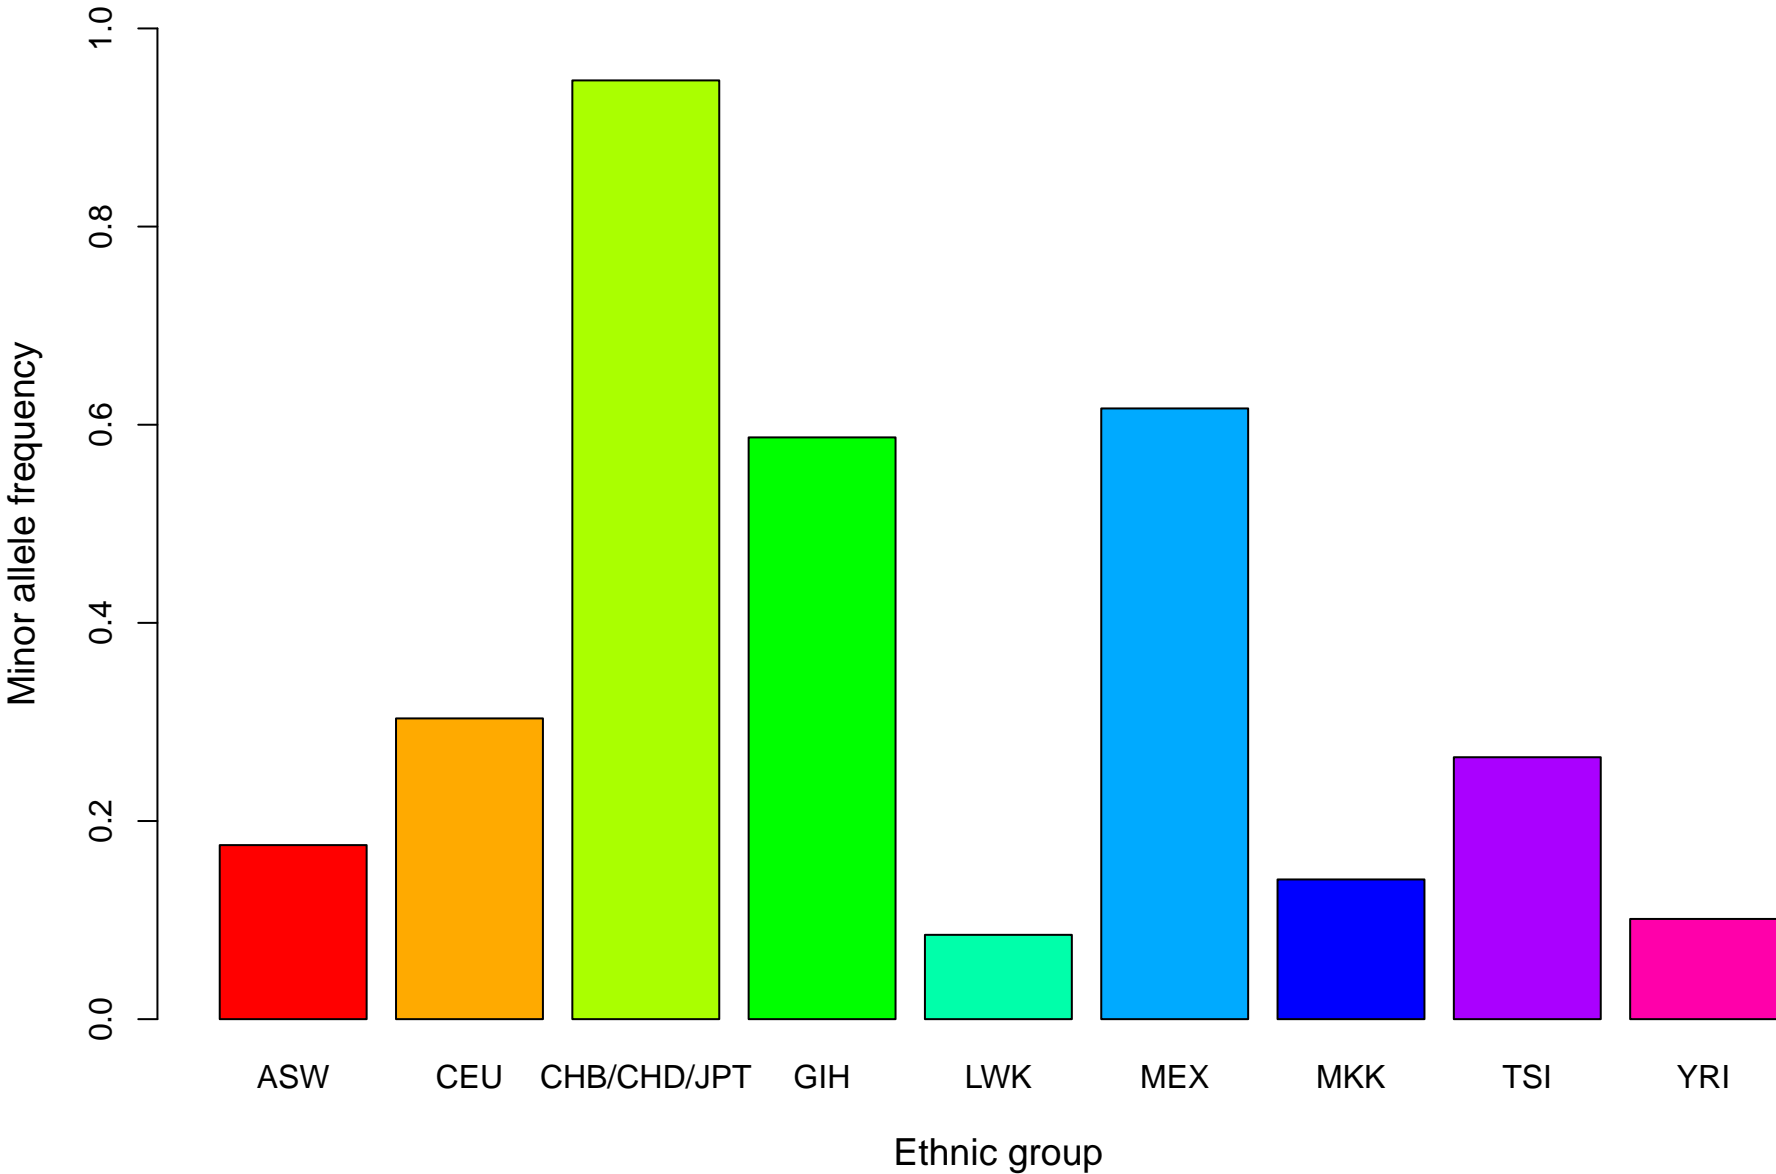

# rs4789193\_A

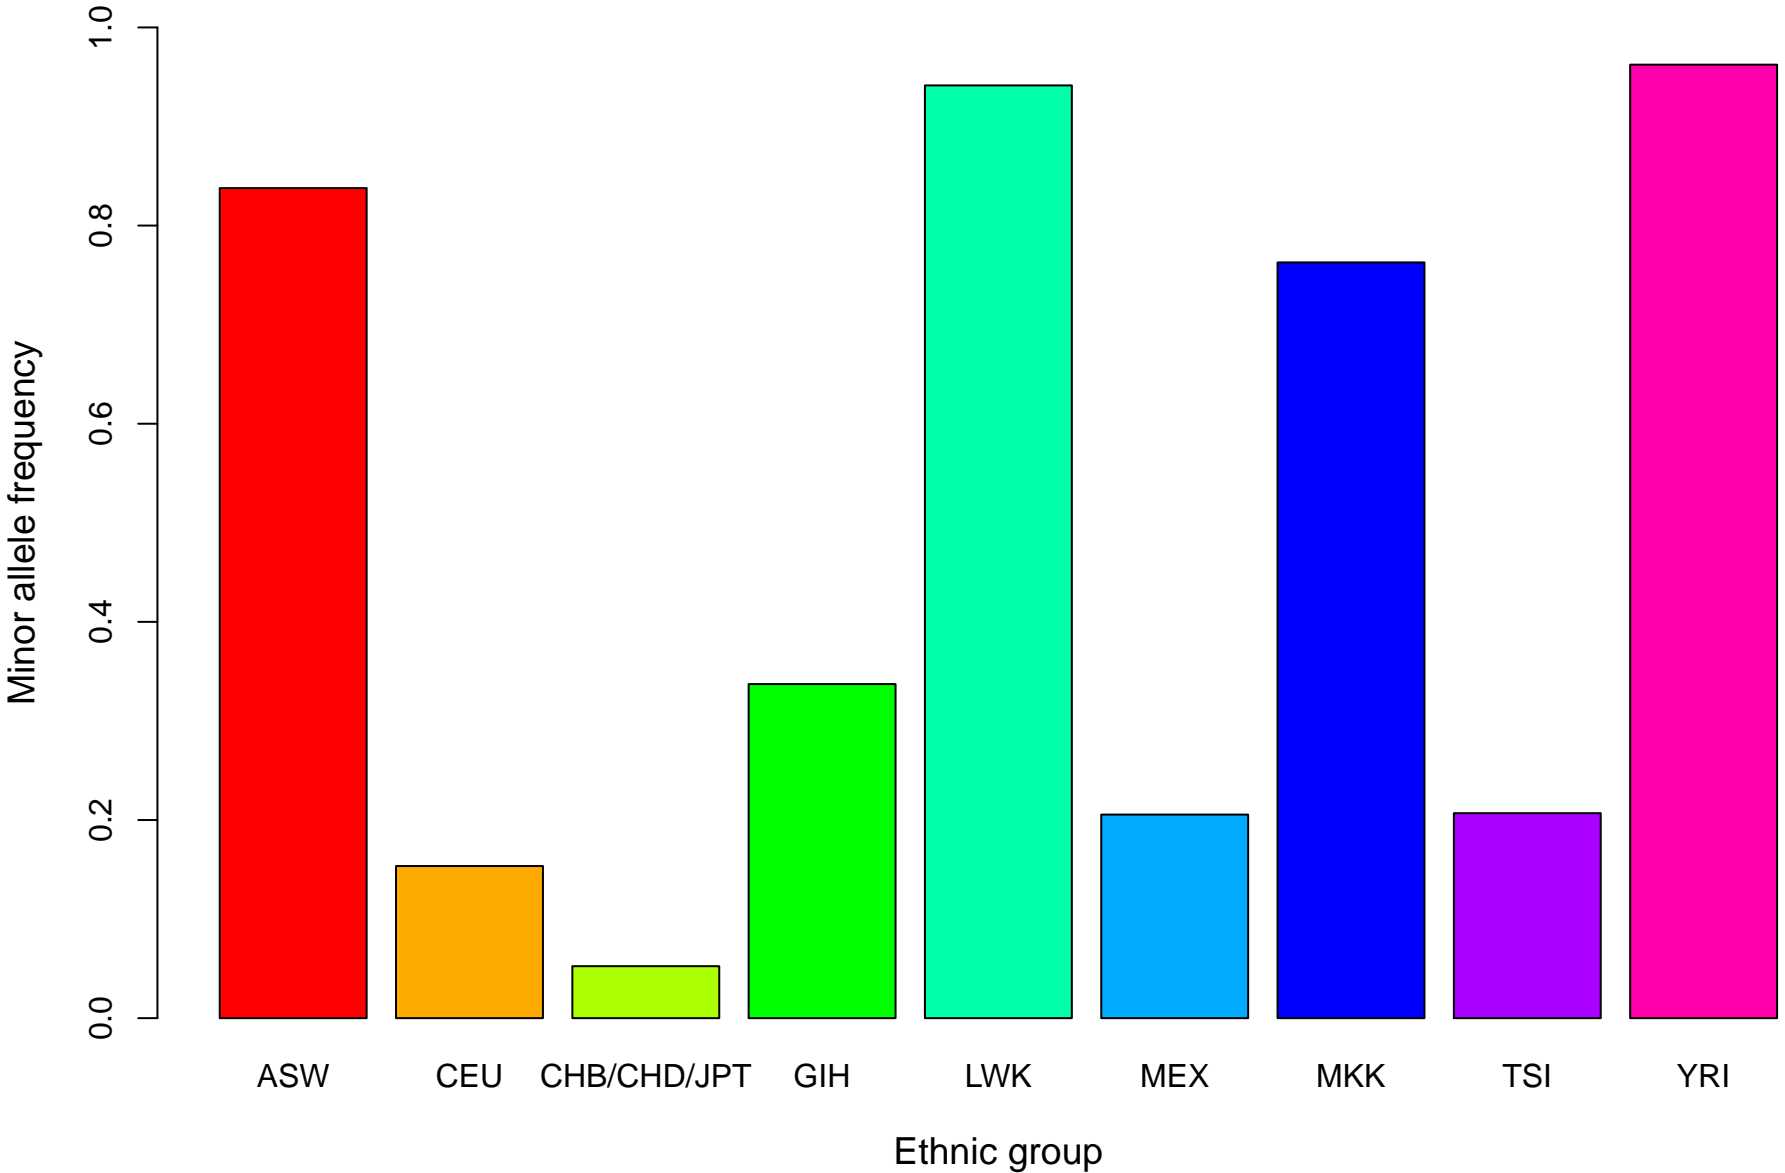

# rs865670\_A

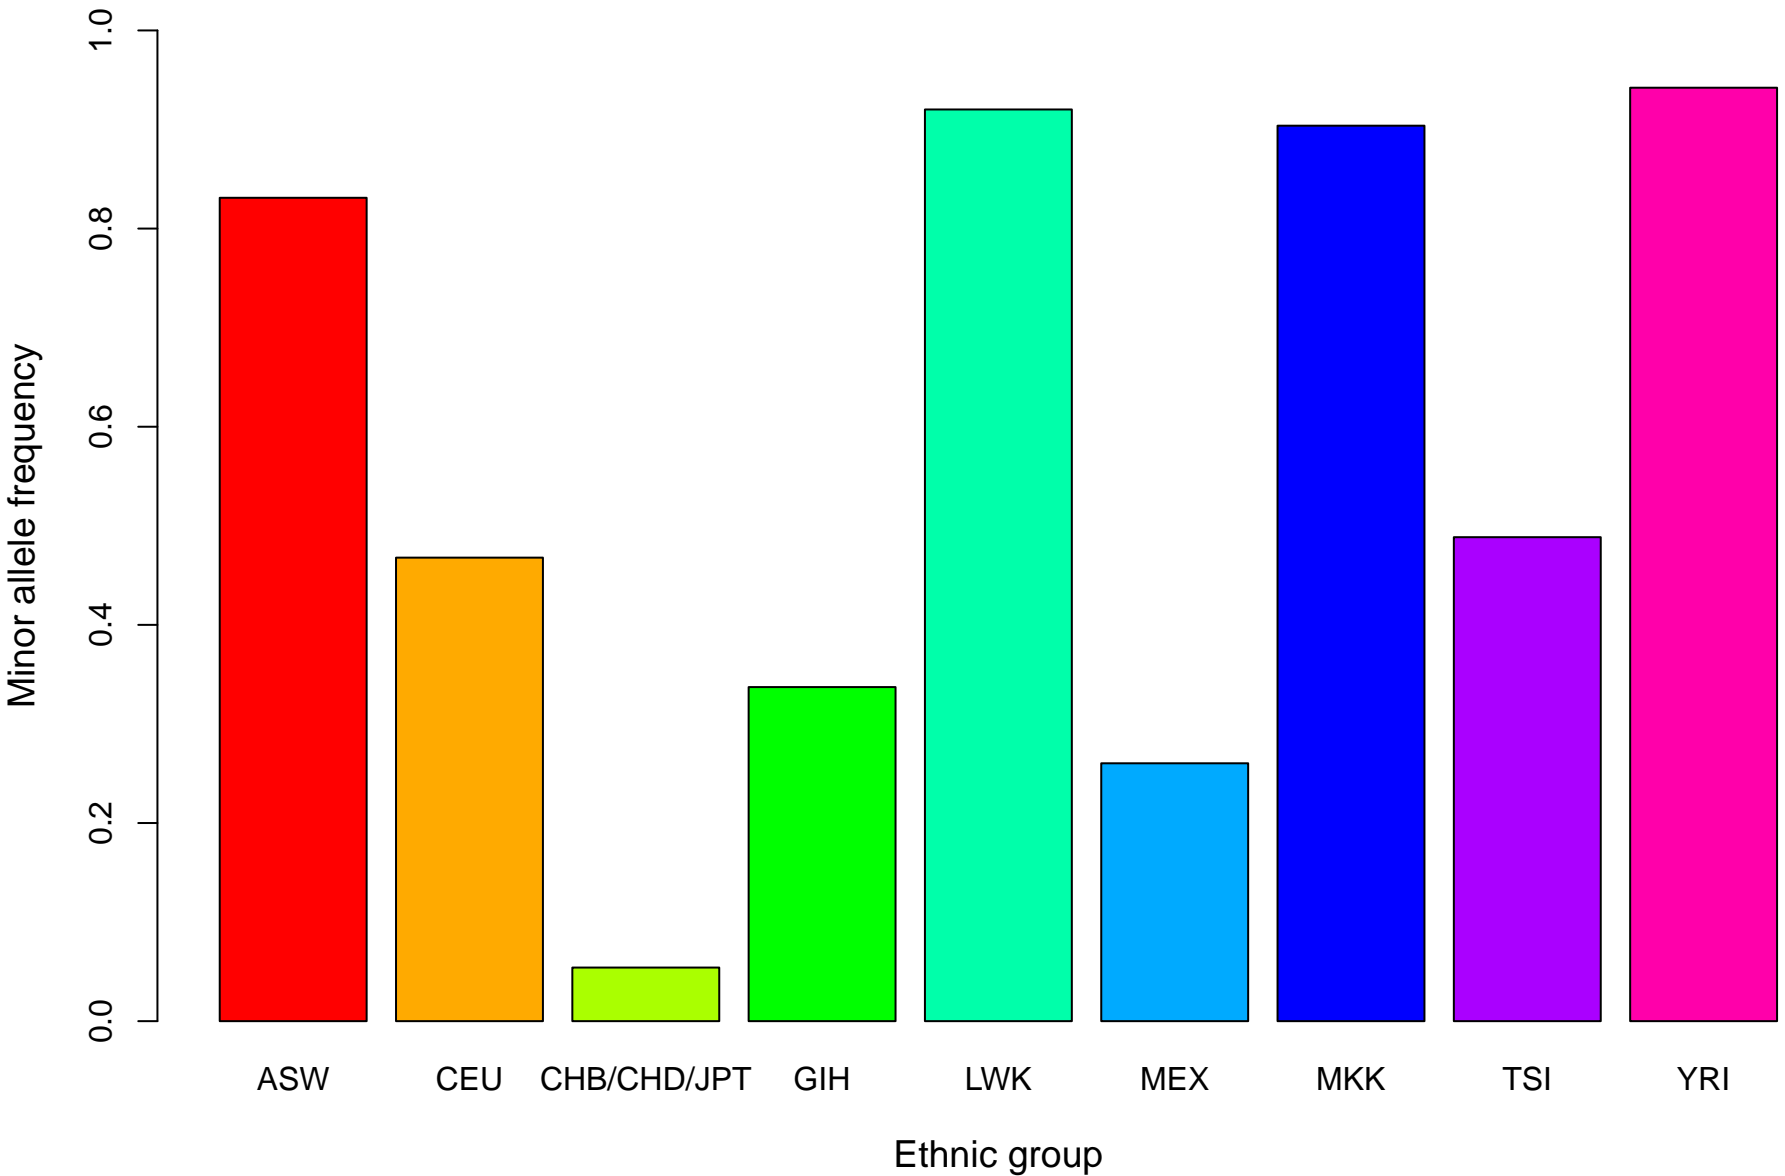

# rs4619931\_A

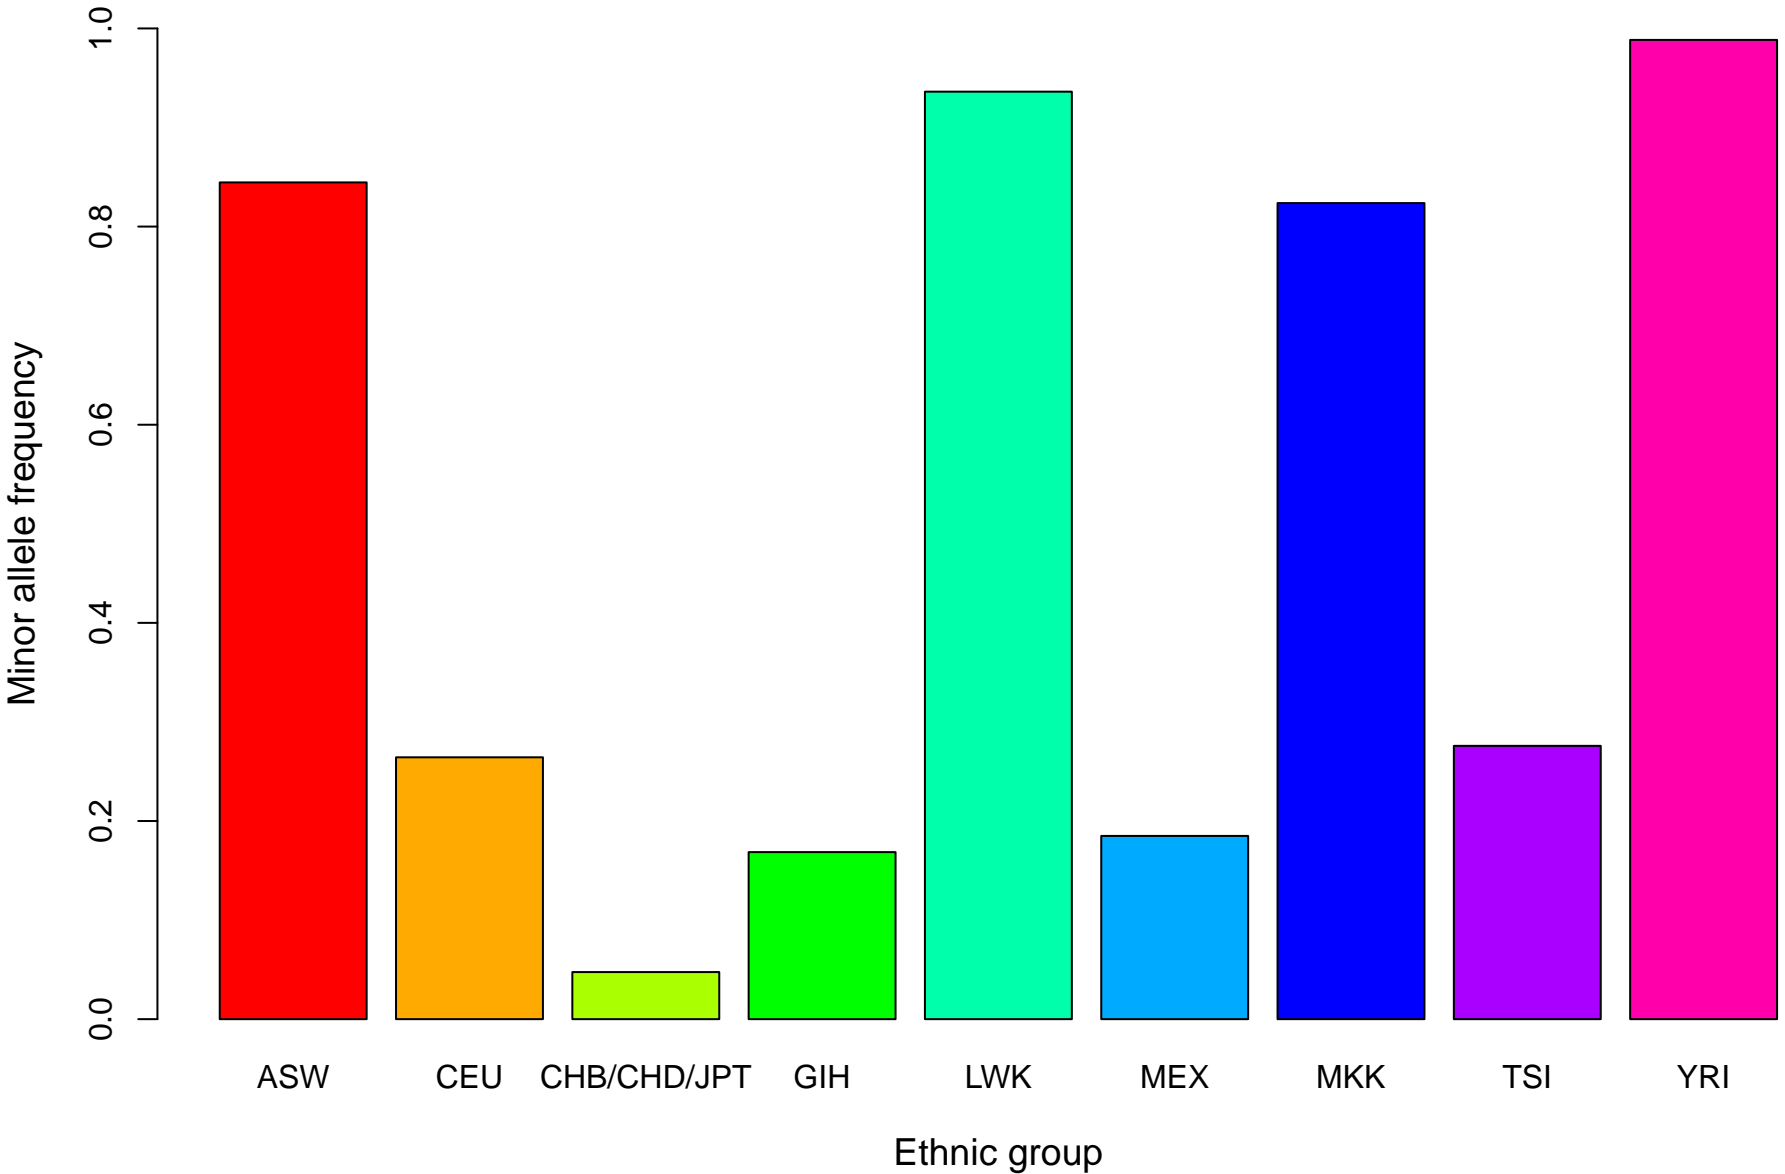

# rs1378579\_C

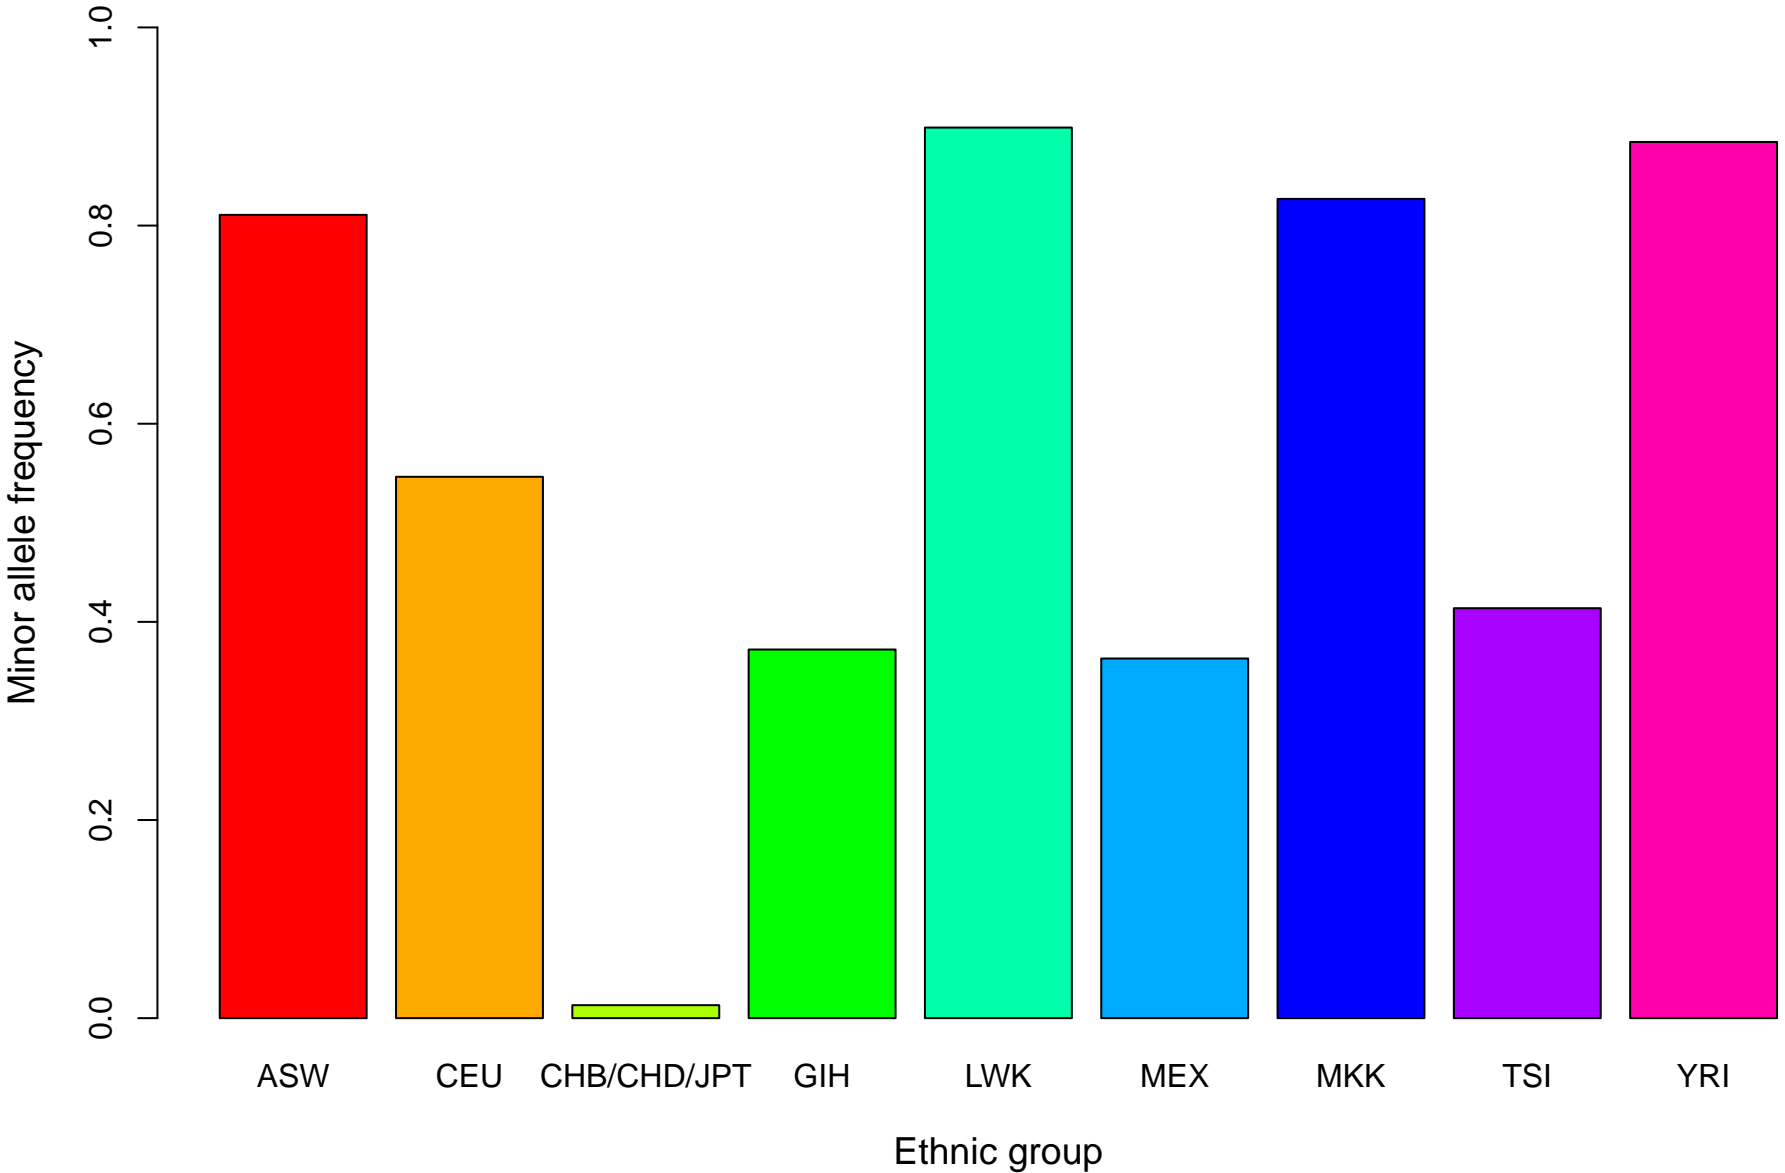

# rs10868789\_A

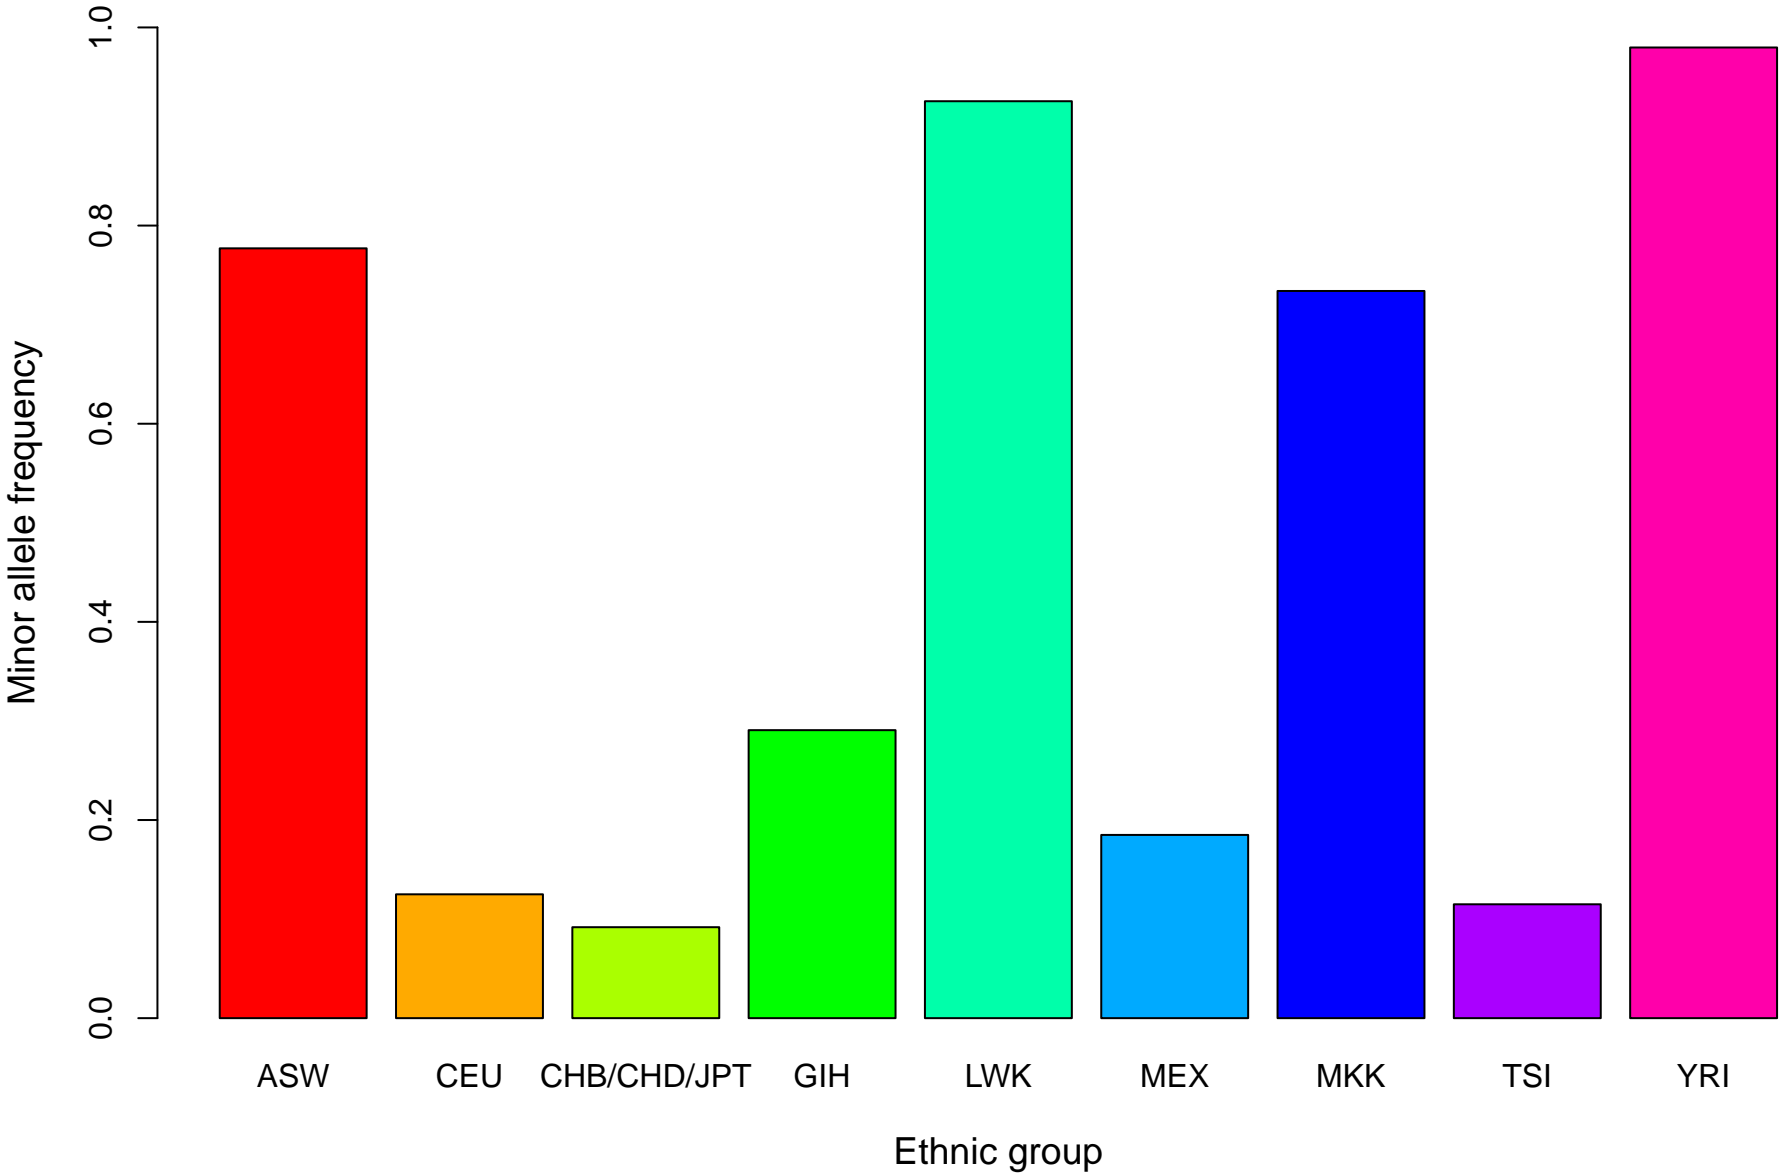

# rs3741598\_T

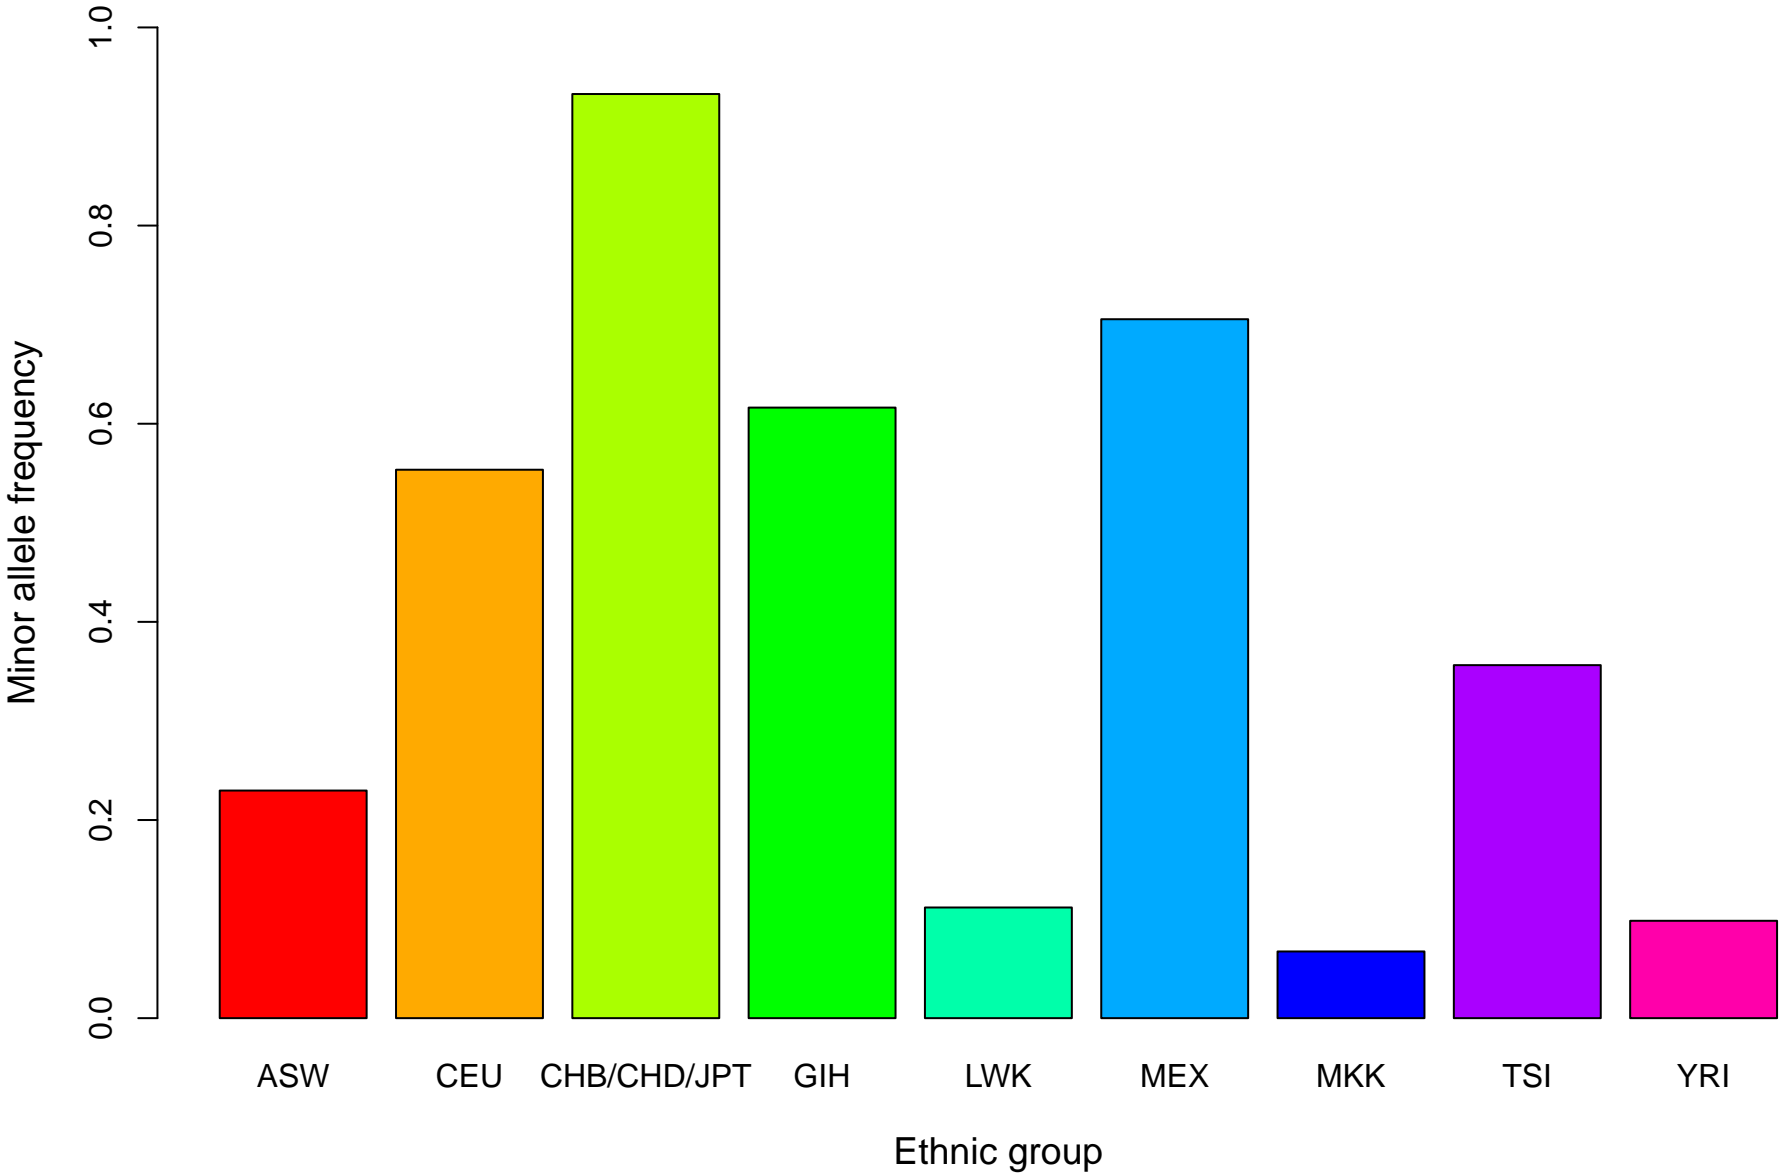



# rs2824974\_C

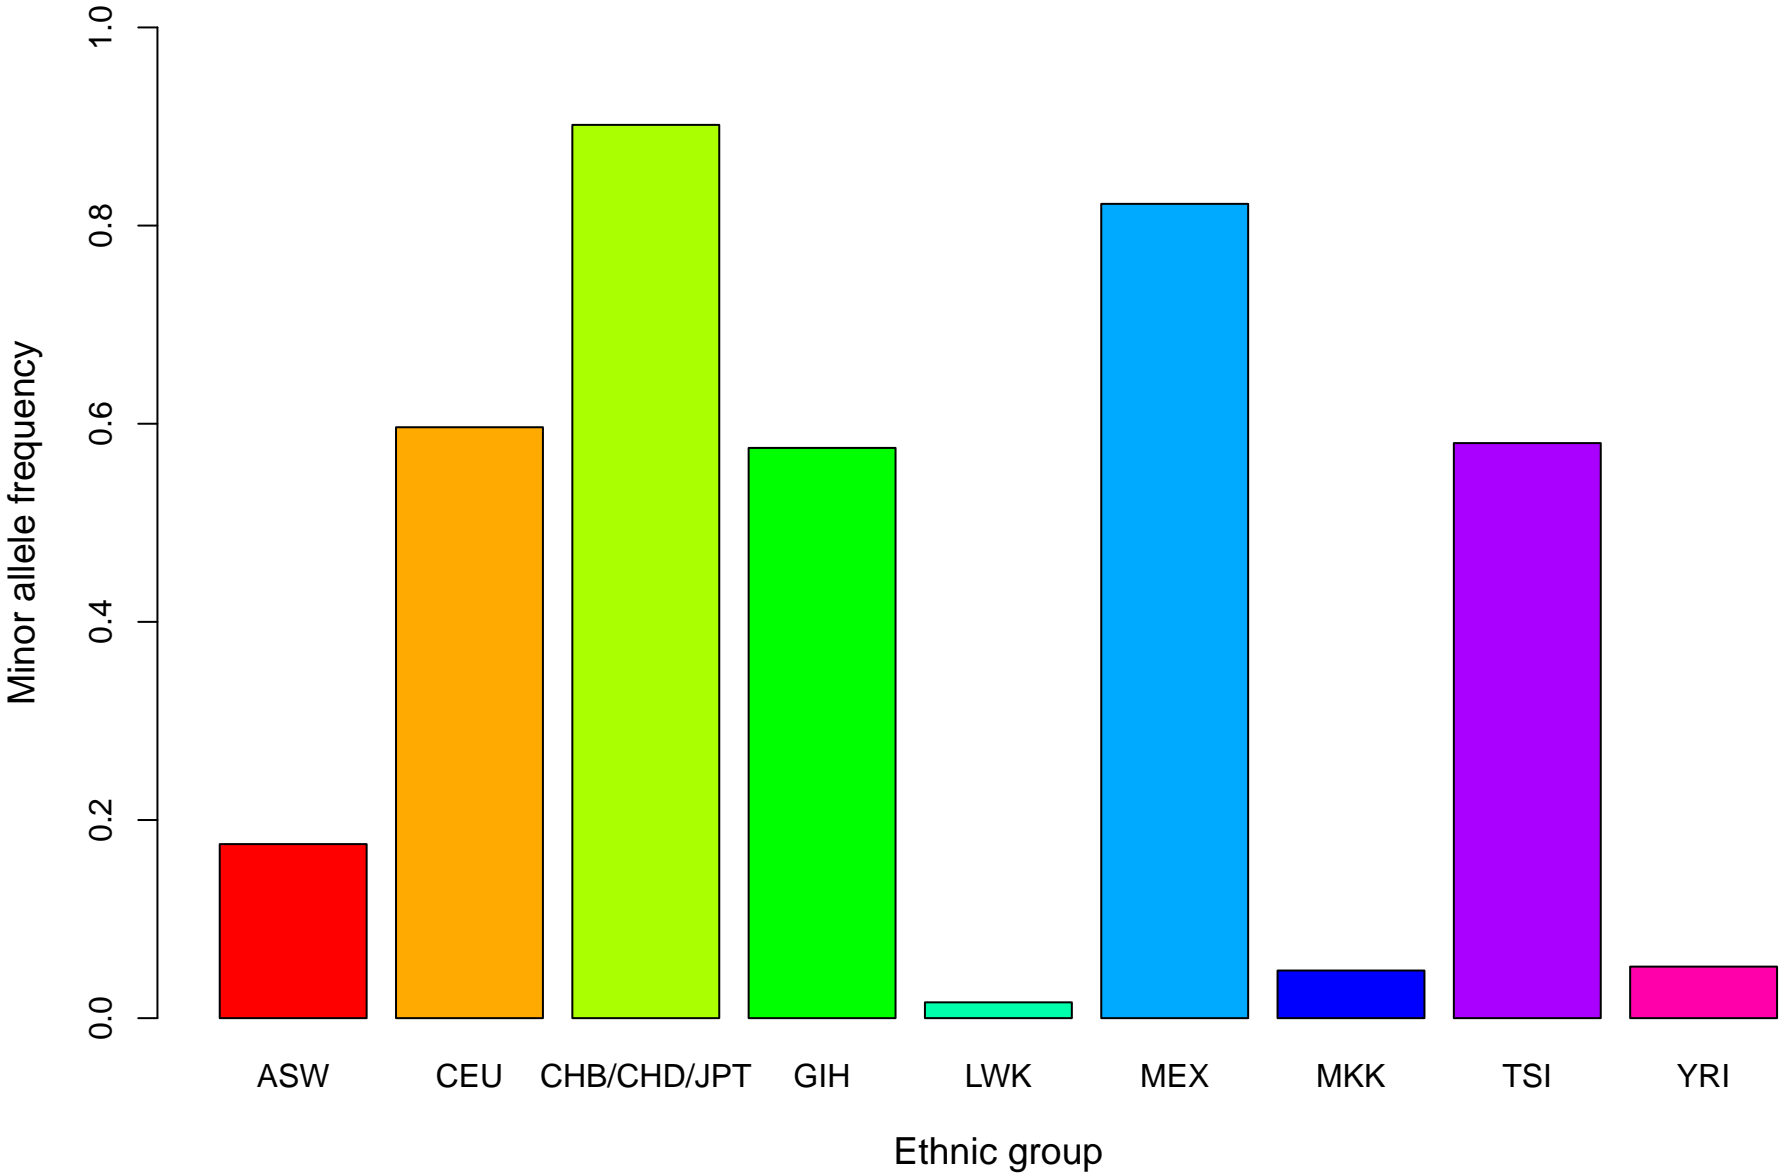

# rs226546\_A

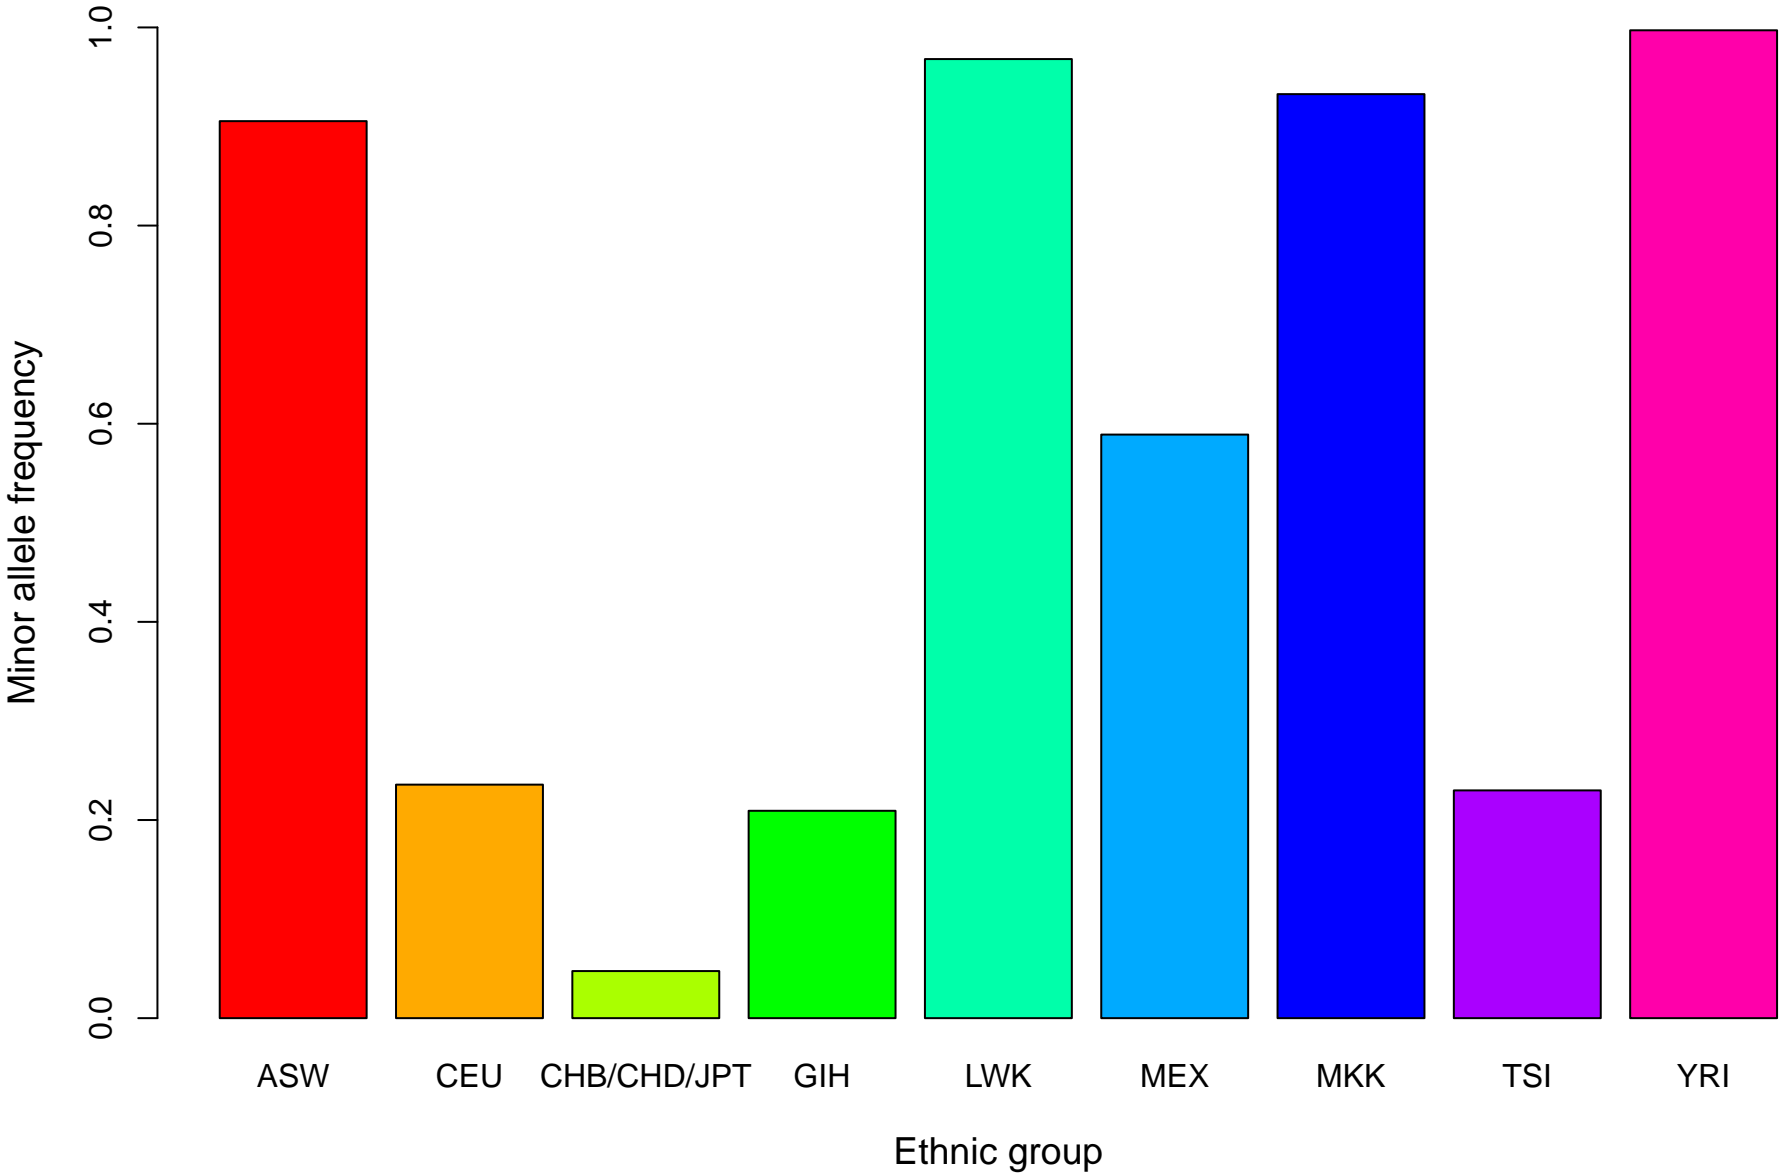

# rs7575245\_G

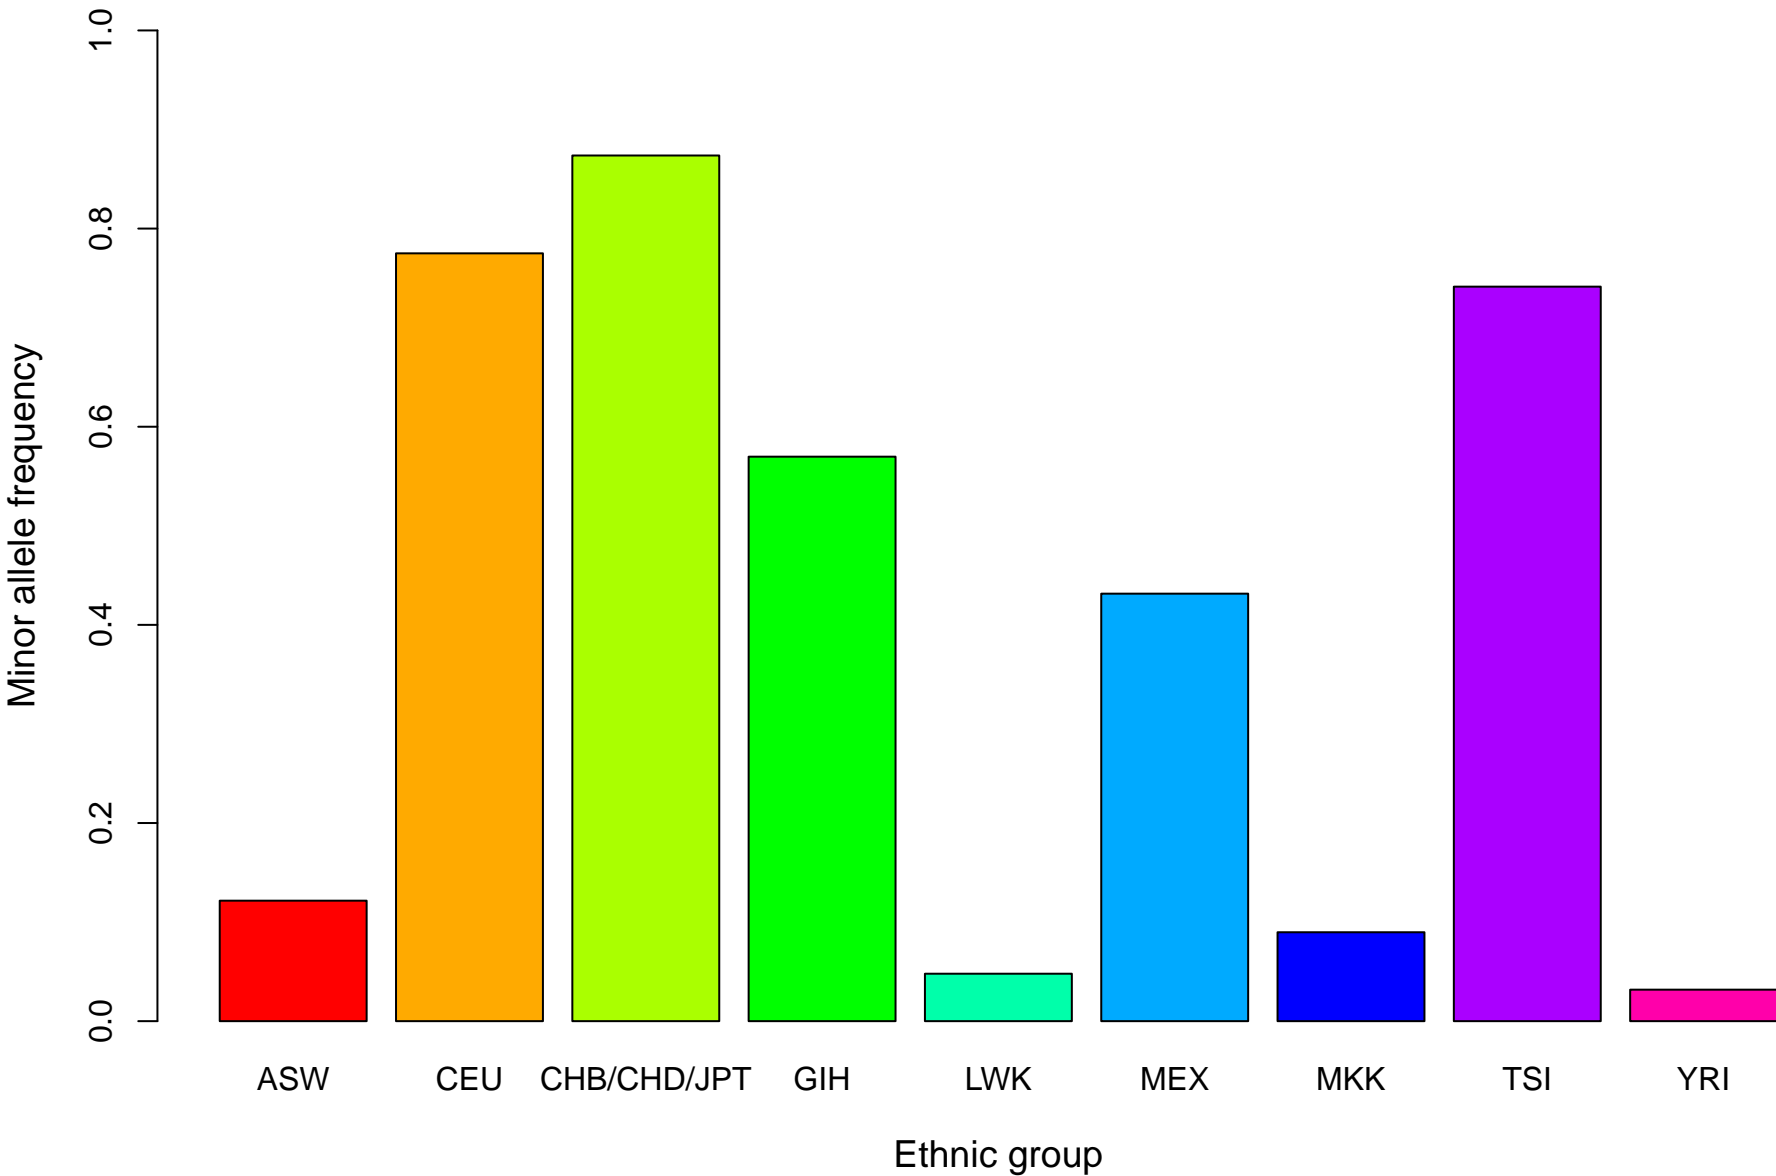

# rs12598978\_T

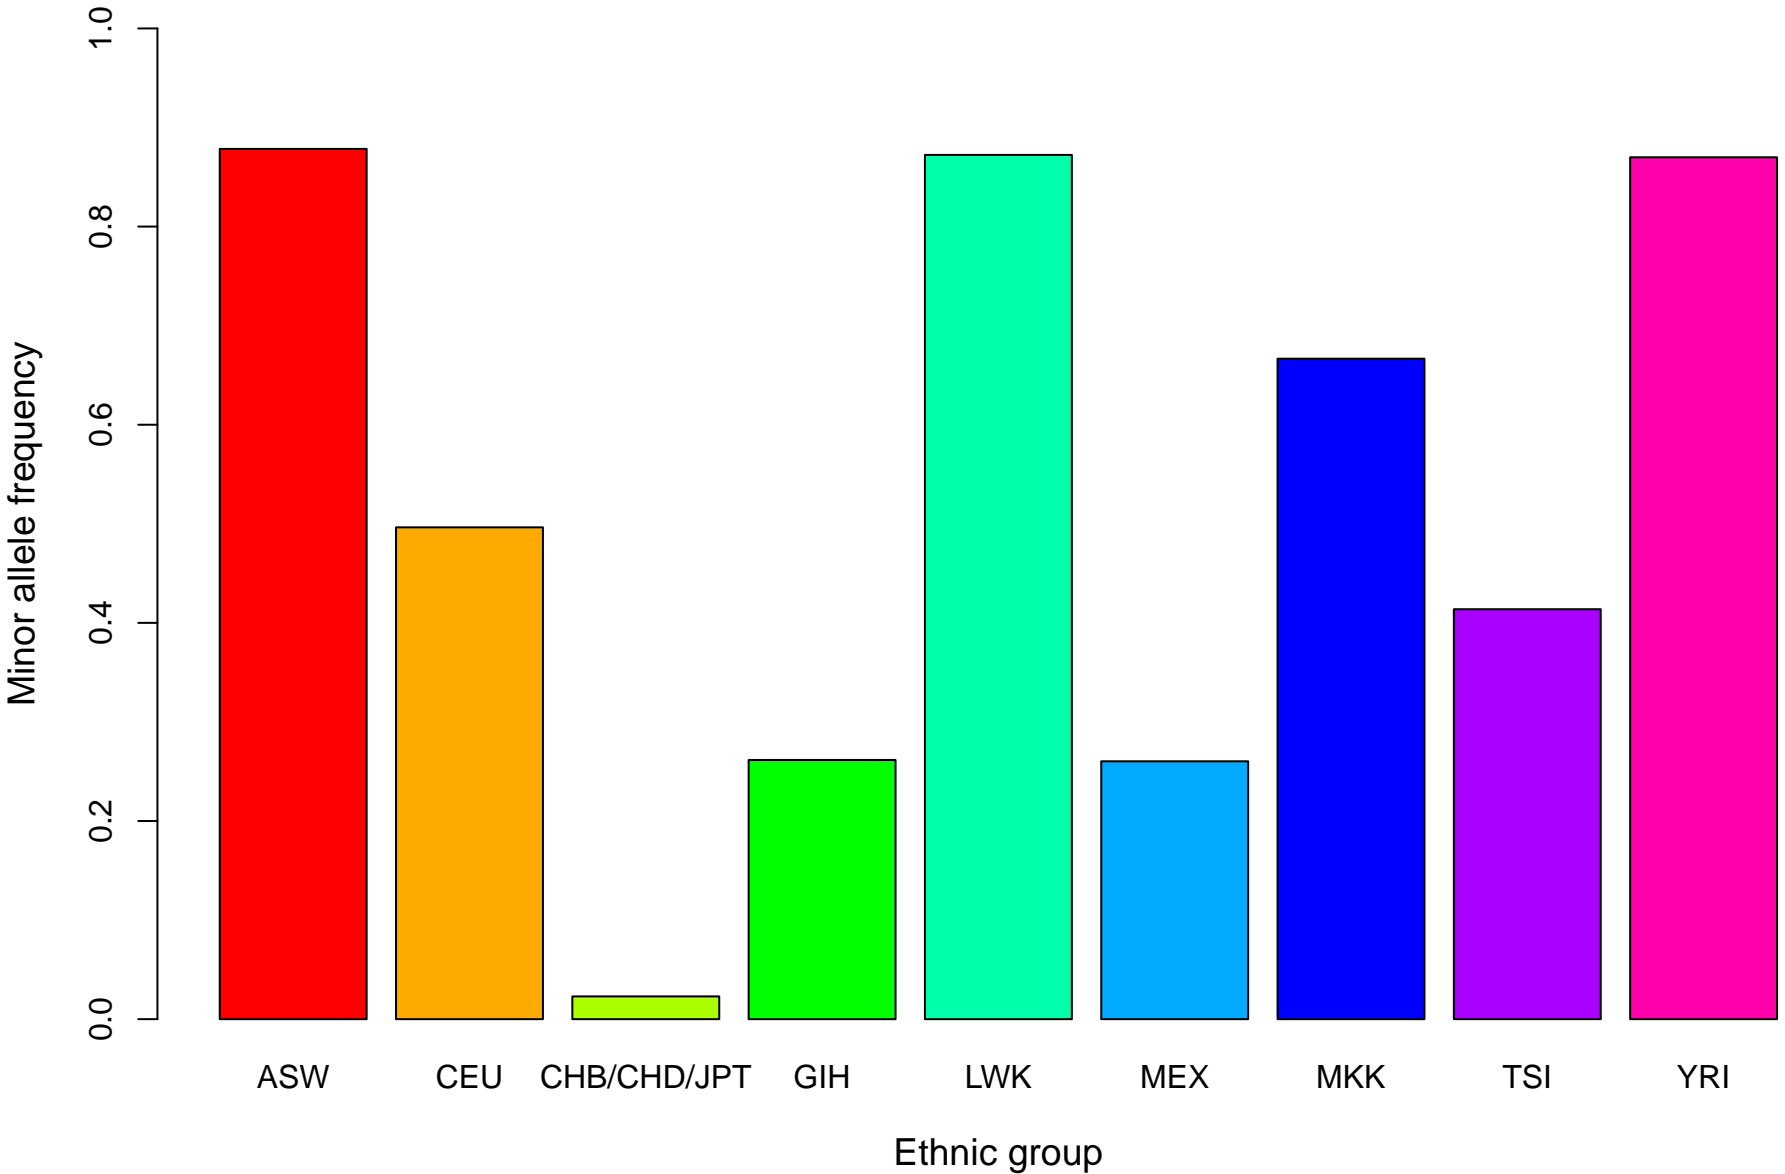

# rs297559\_C

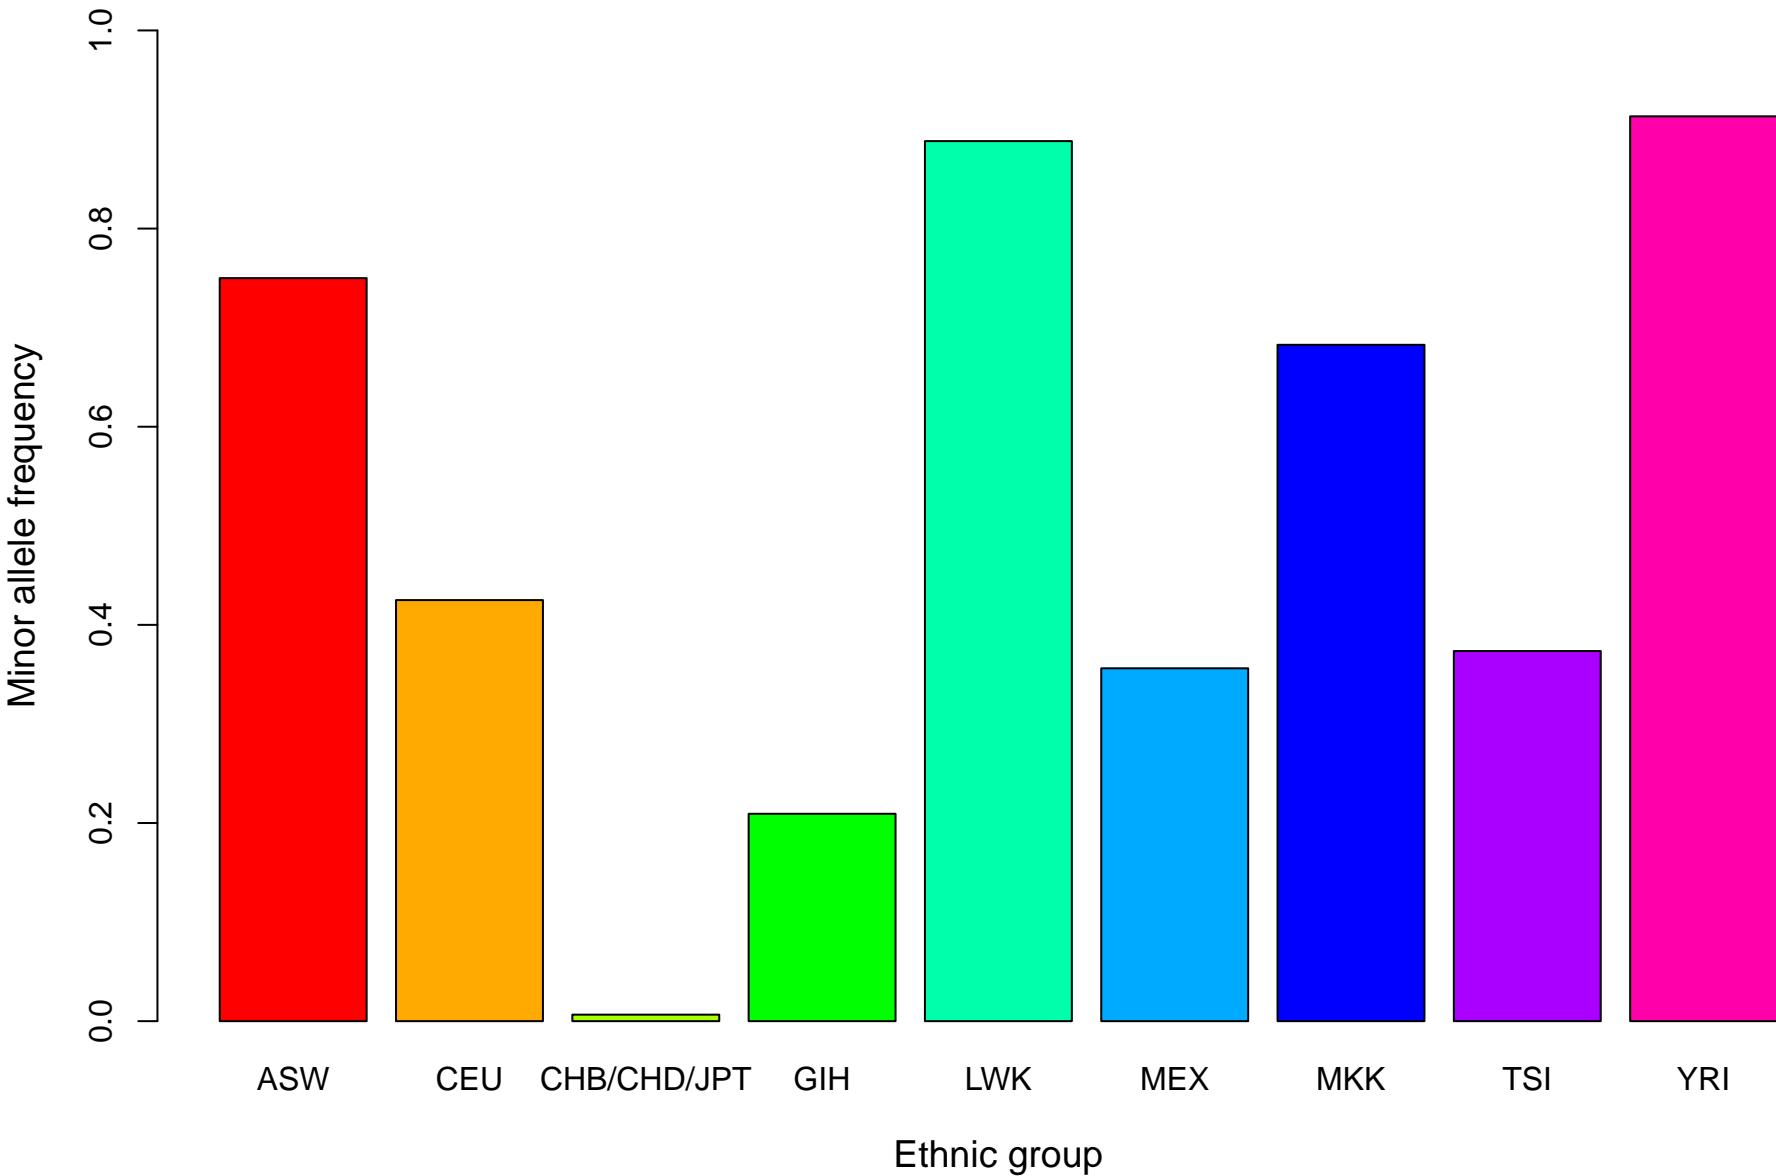

# rs7838833\_G

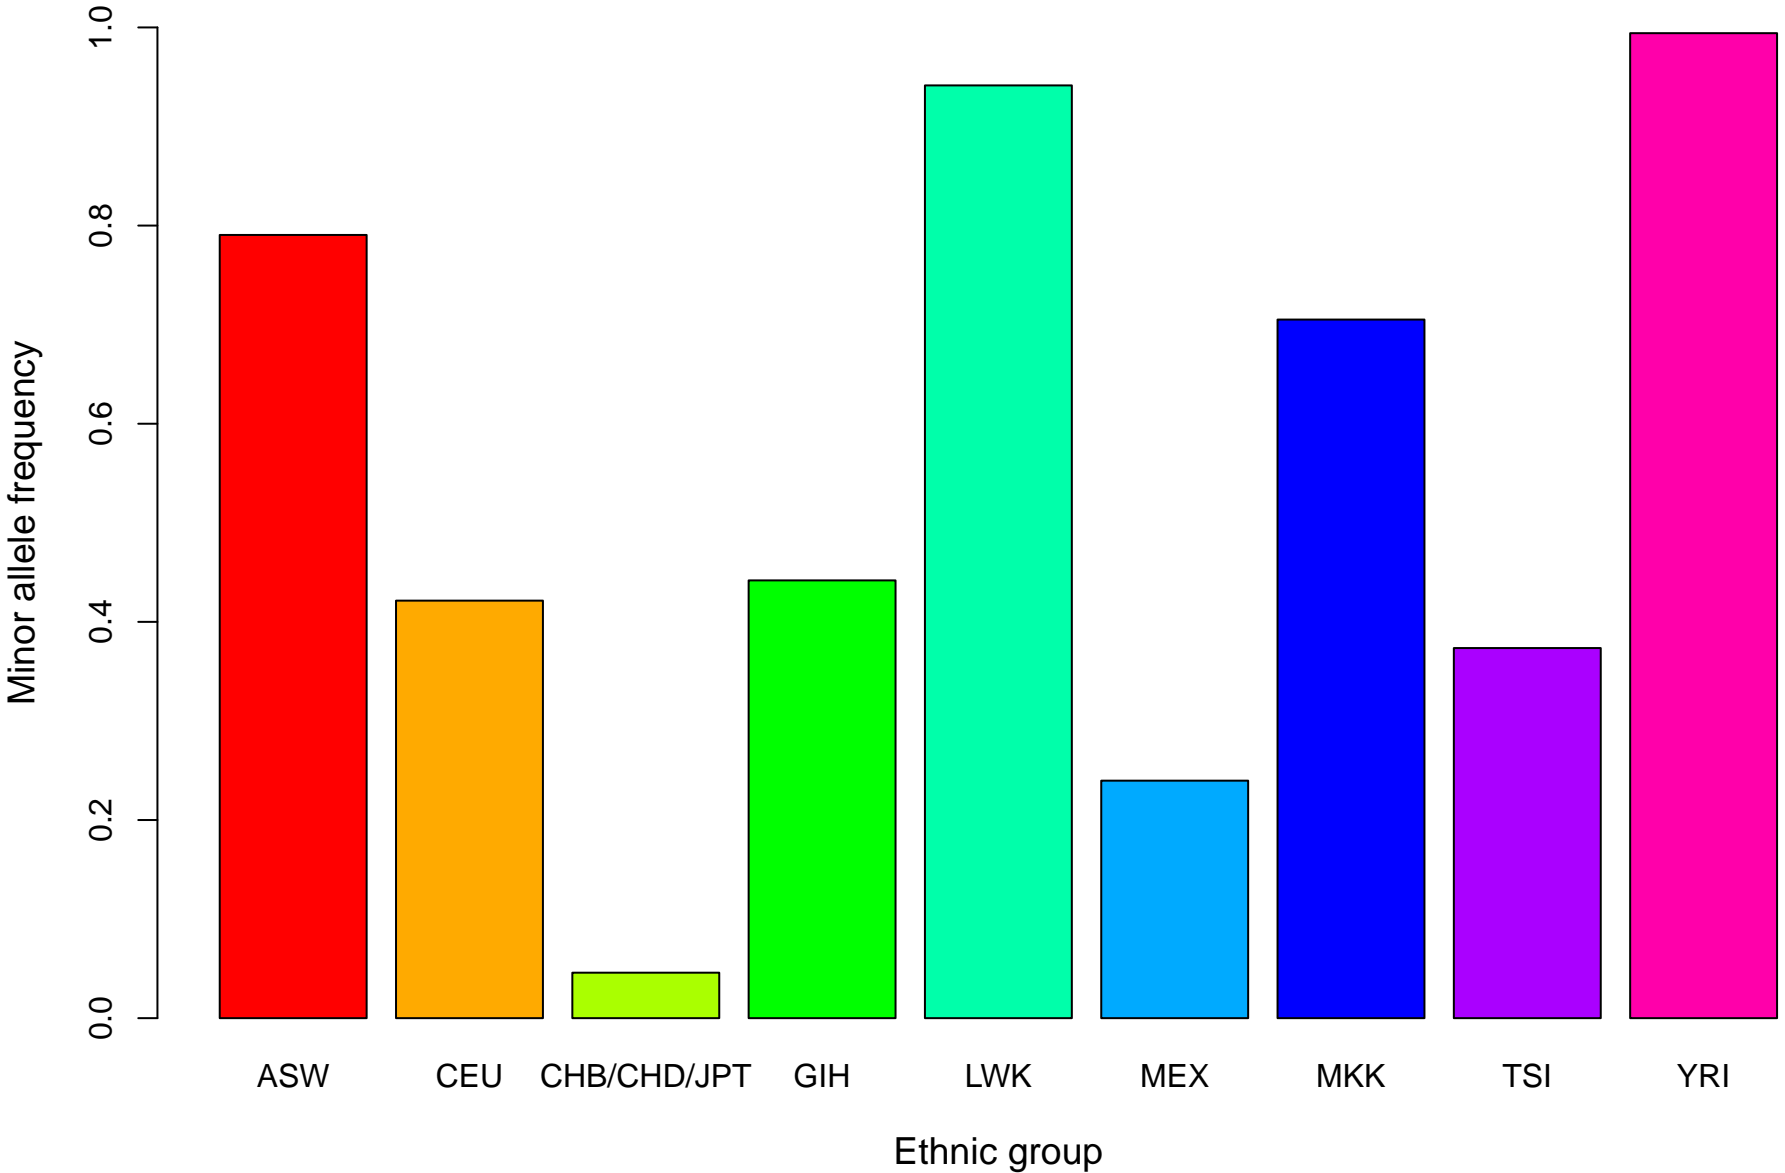

# rs3780293\_A

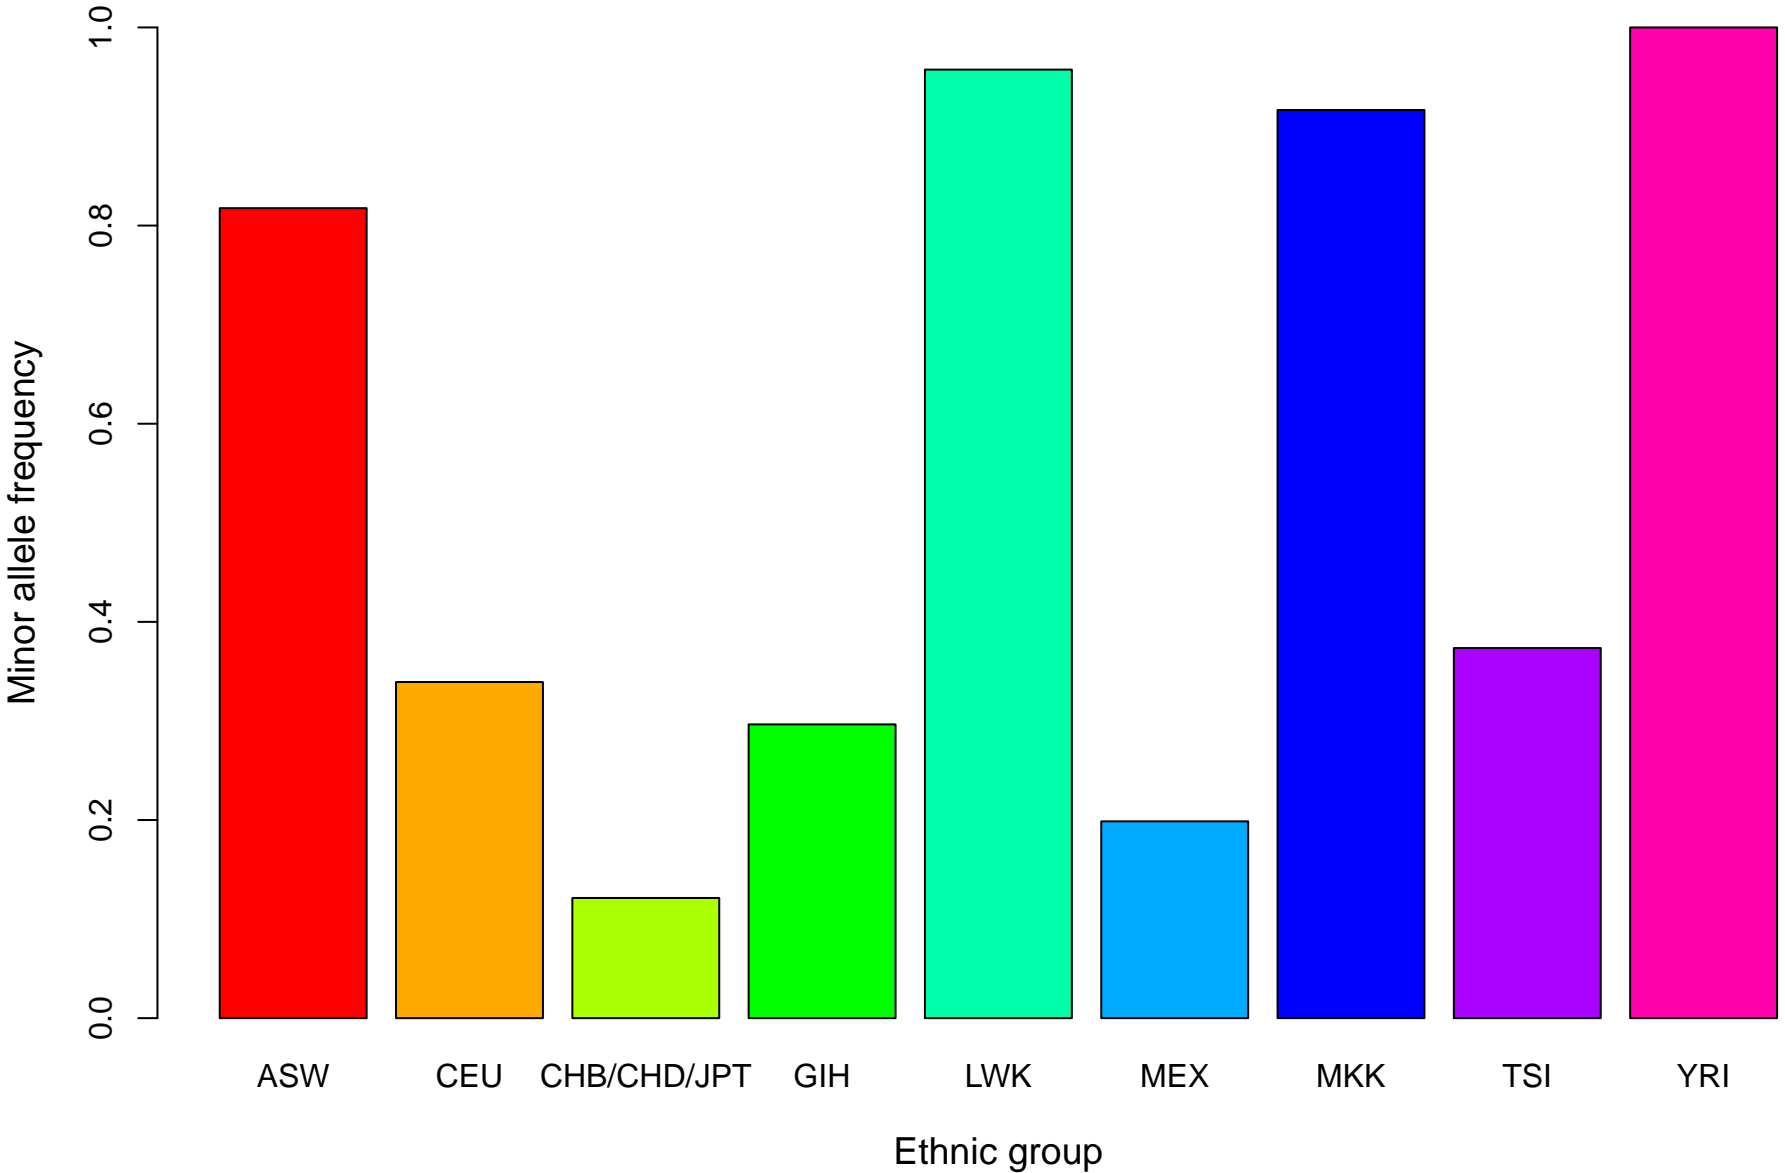

# rs966557\_A

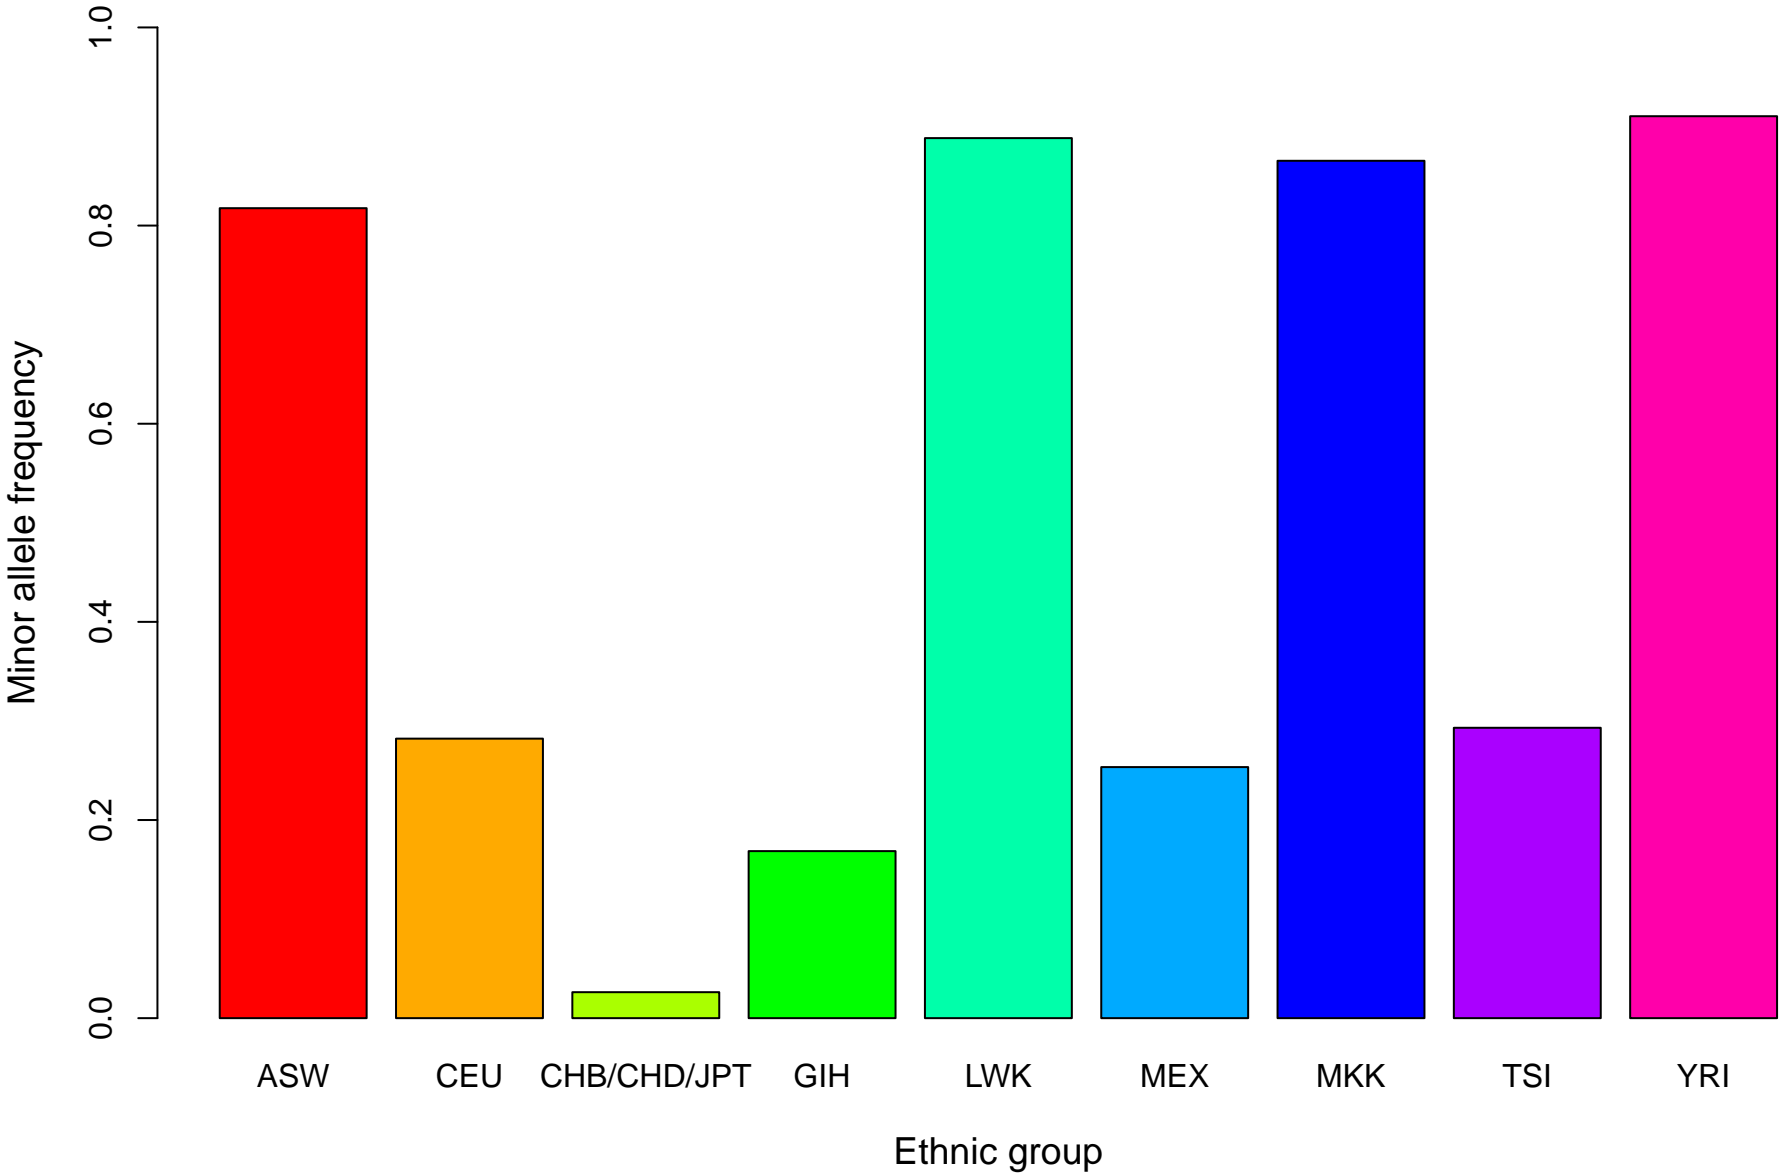



# rs7575234\_T

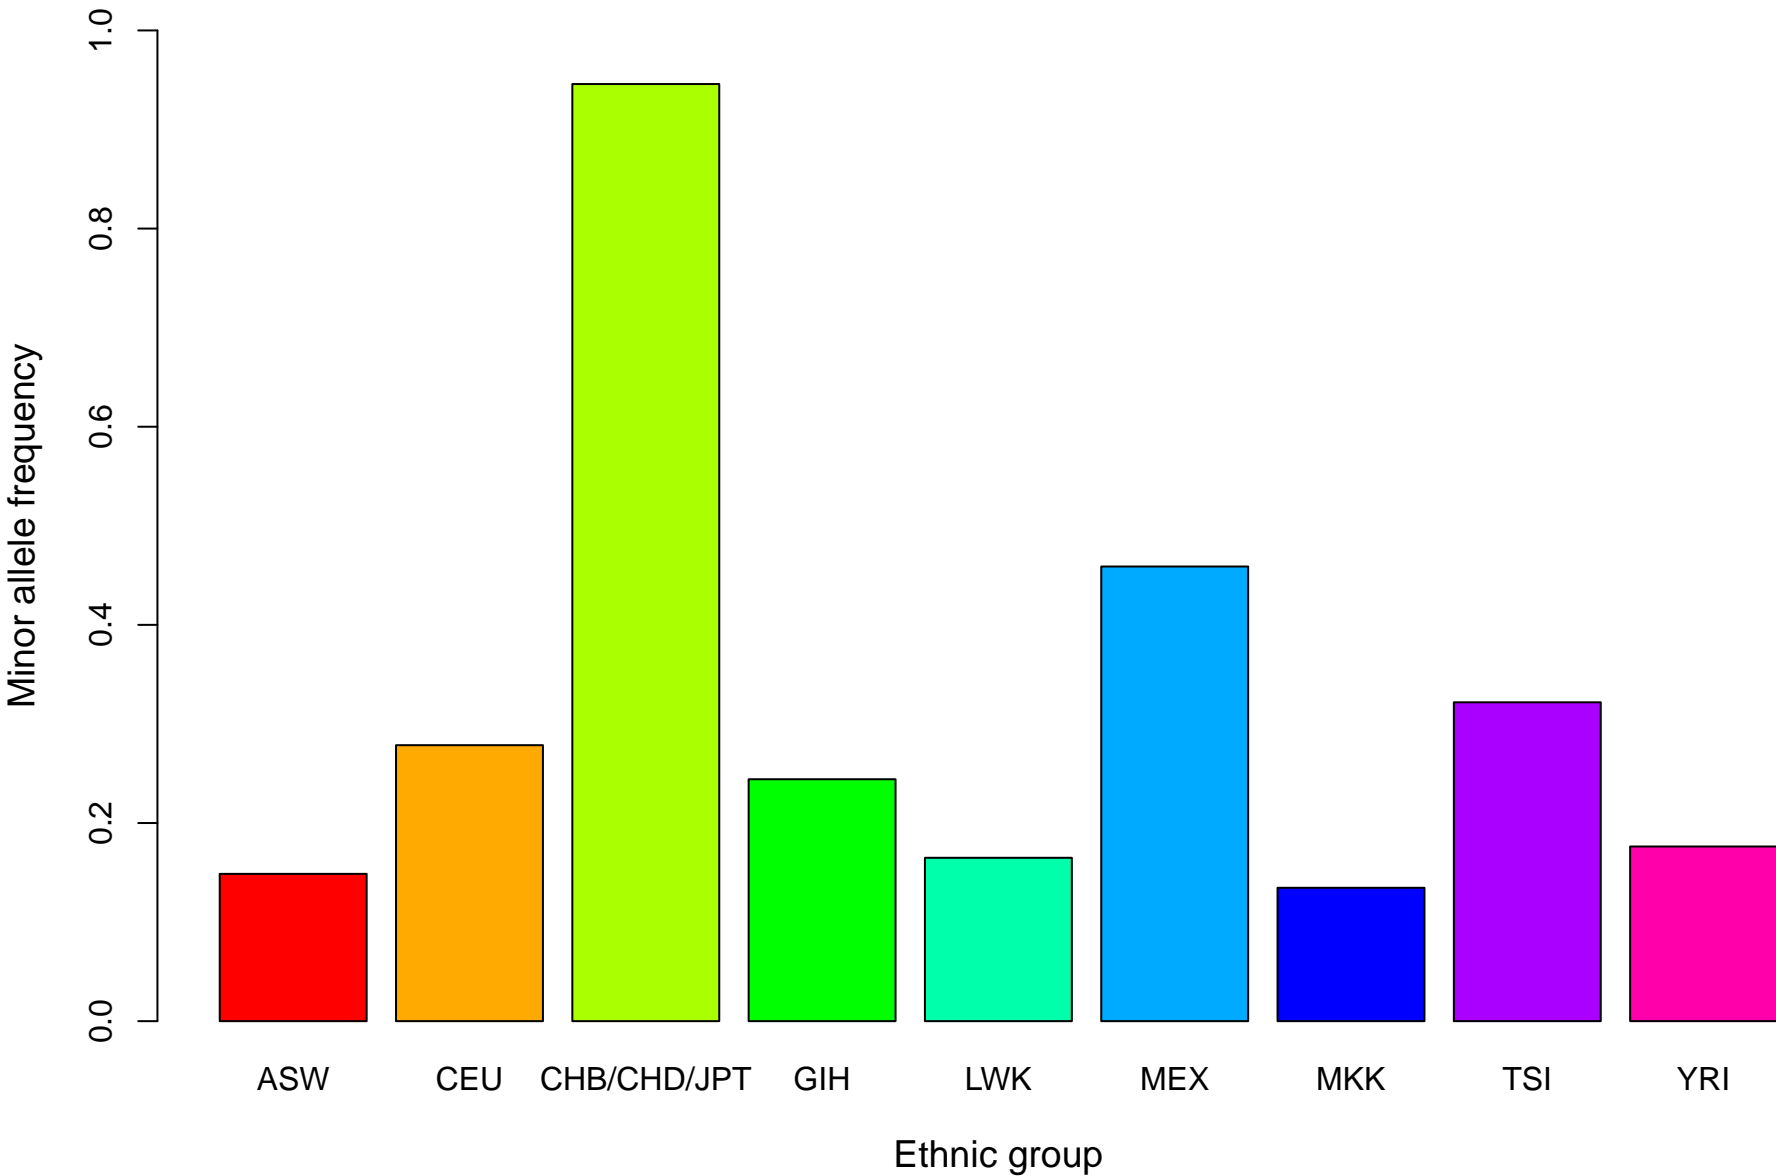

# rs10155966\_A

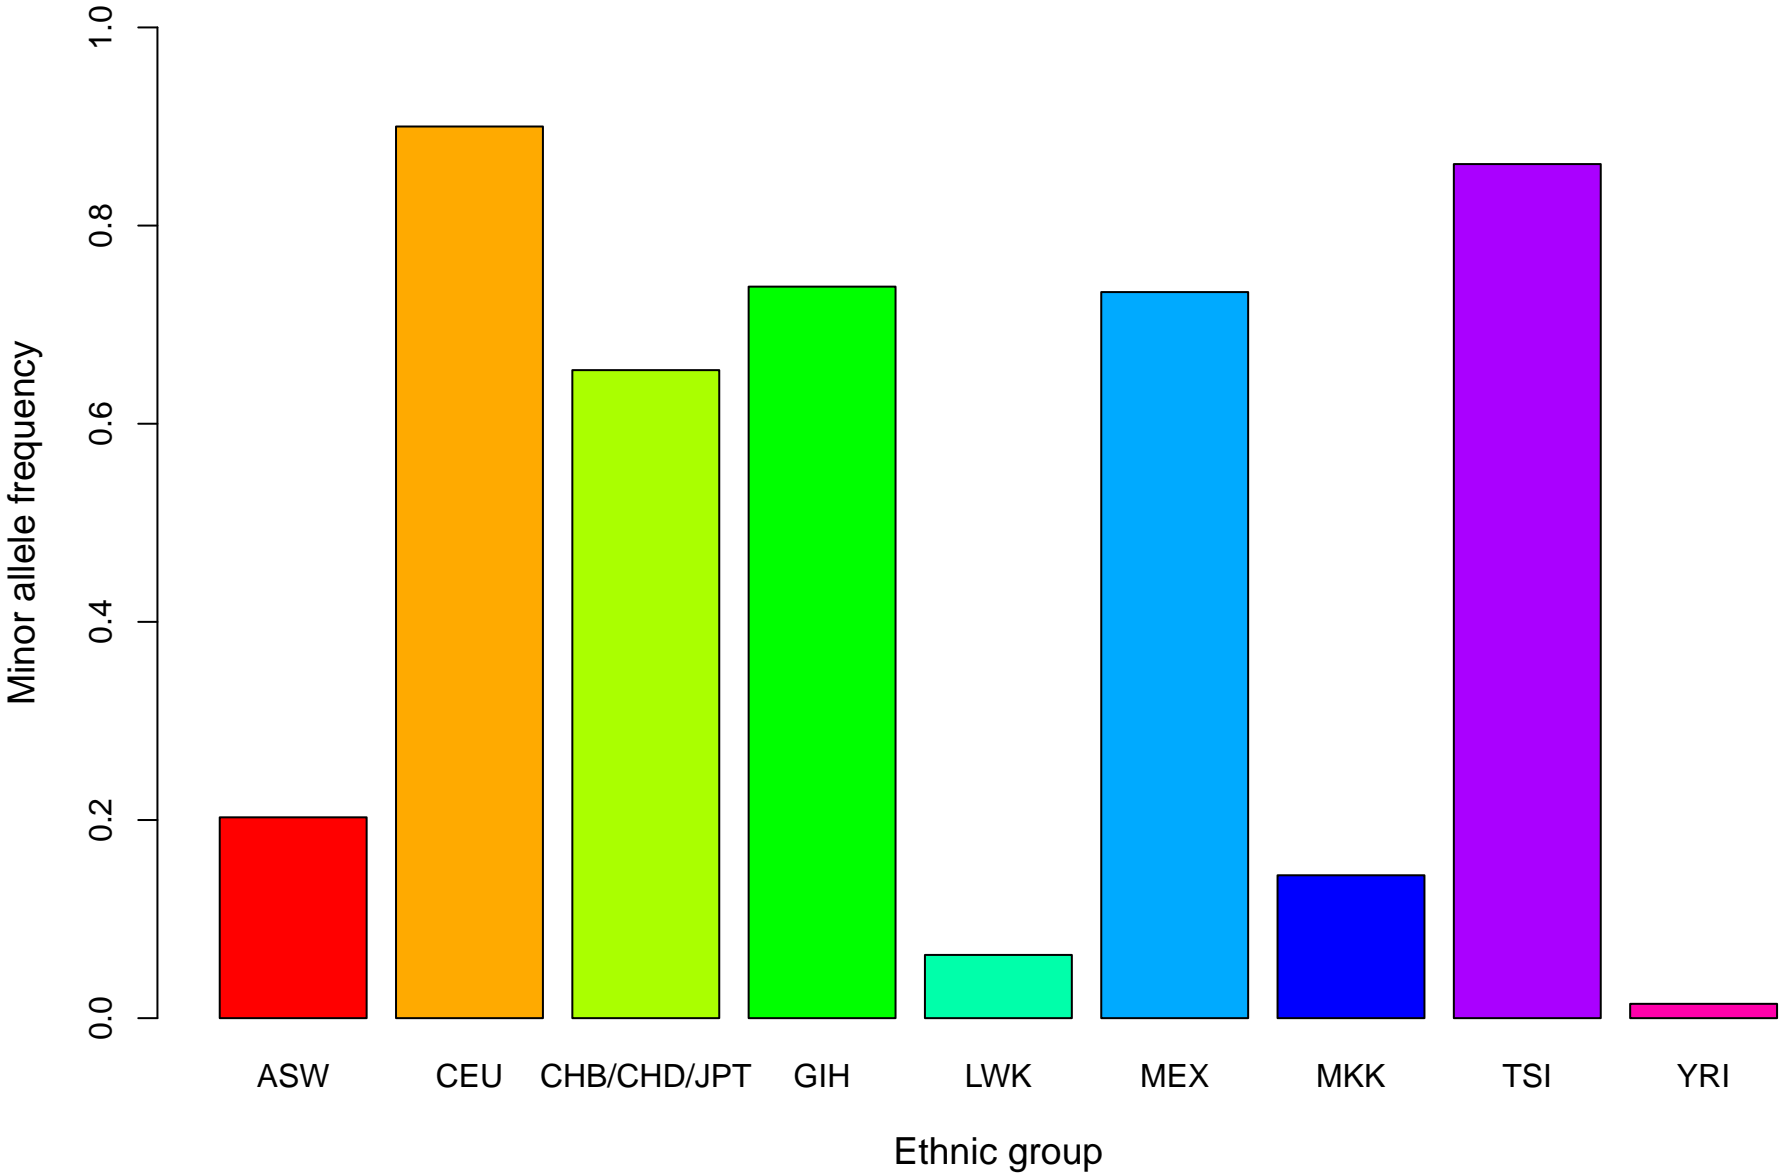

# rs4745841\_C

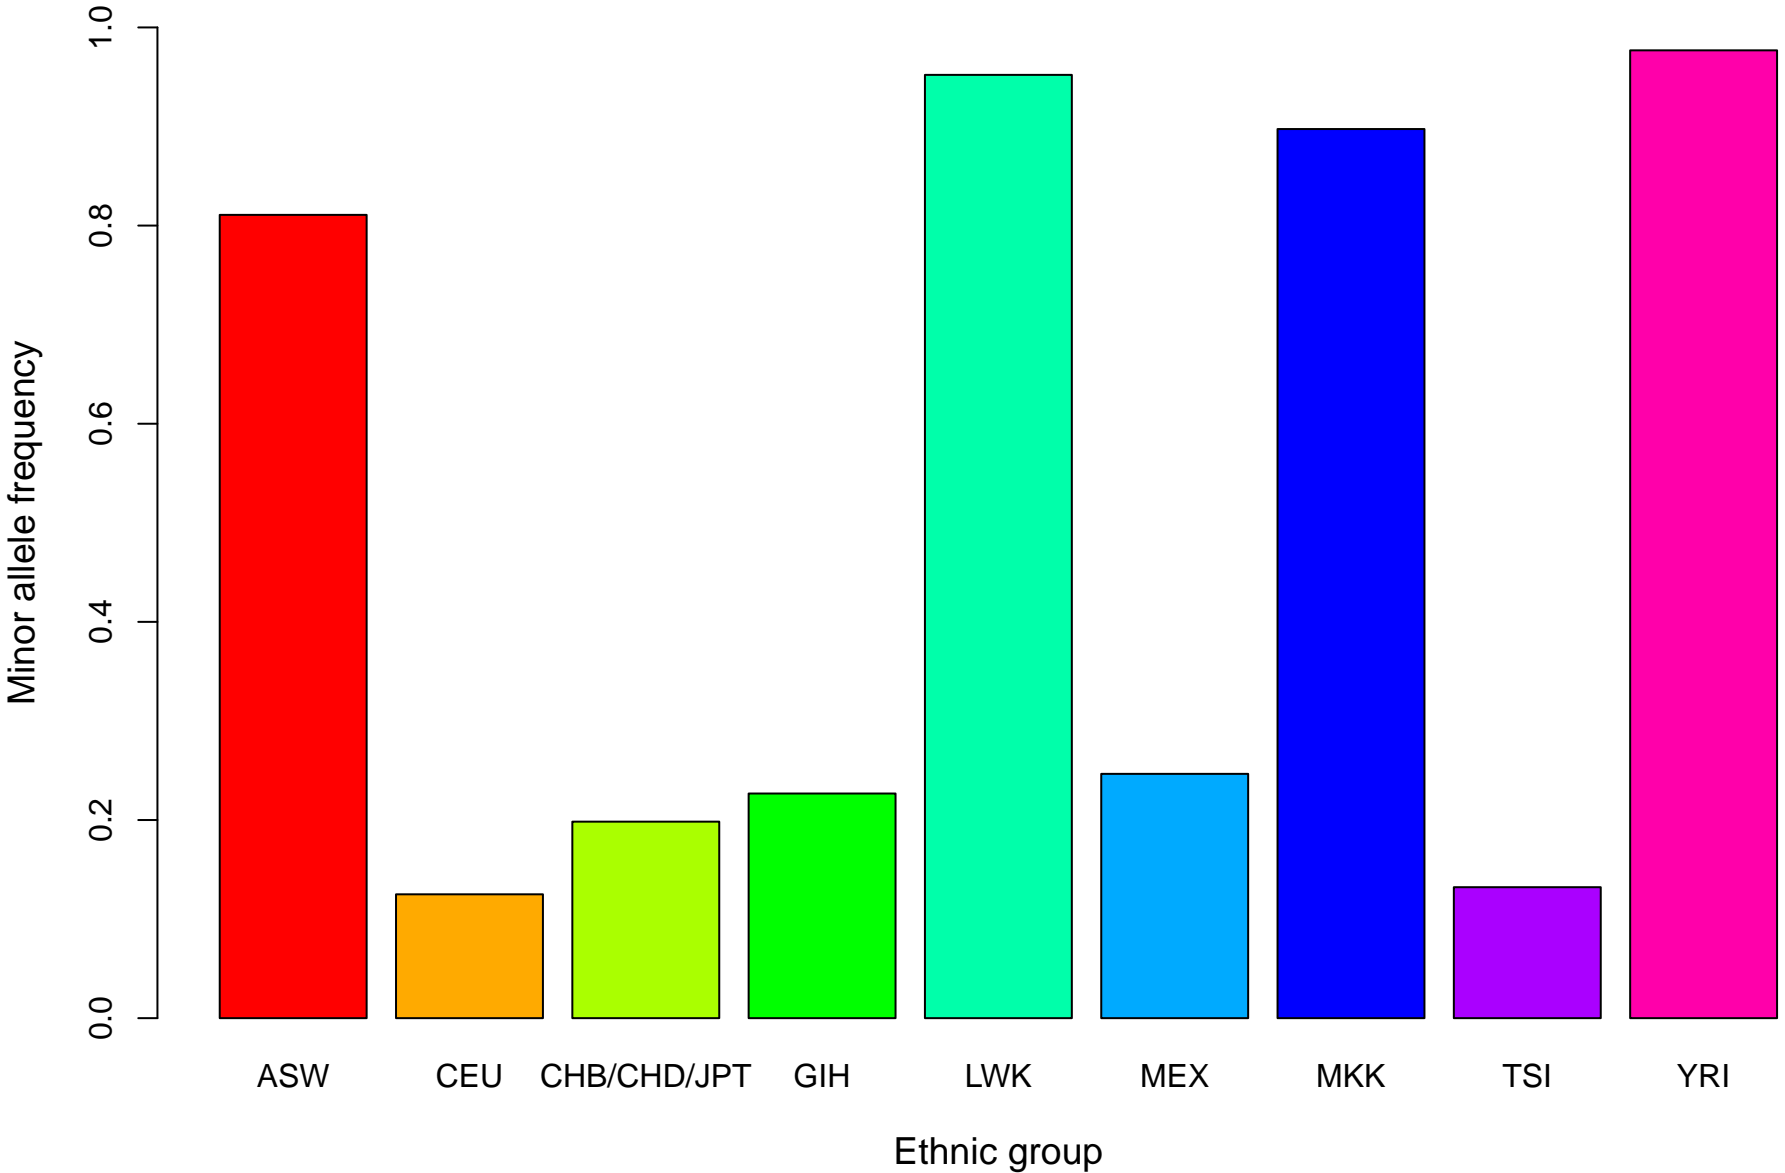

# rs9401888\_A



# rs9673444\_T

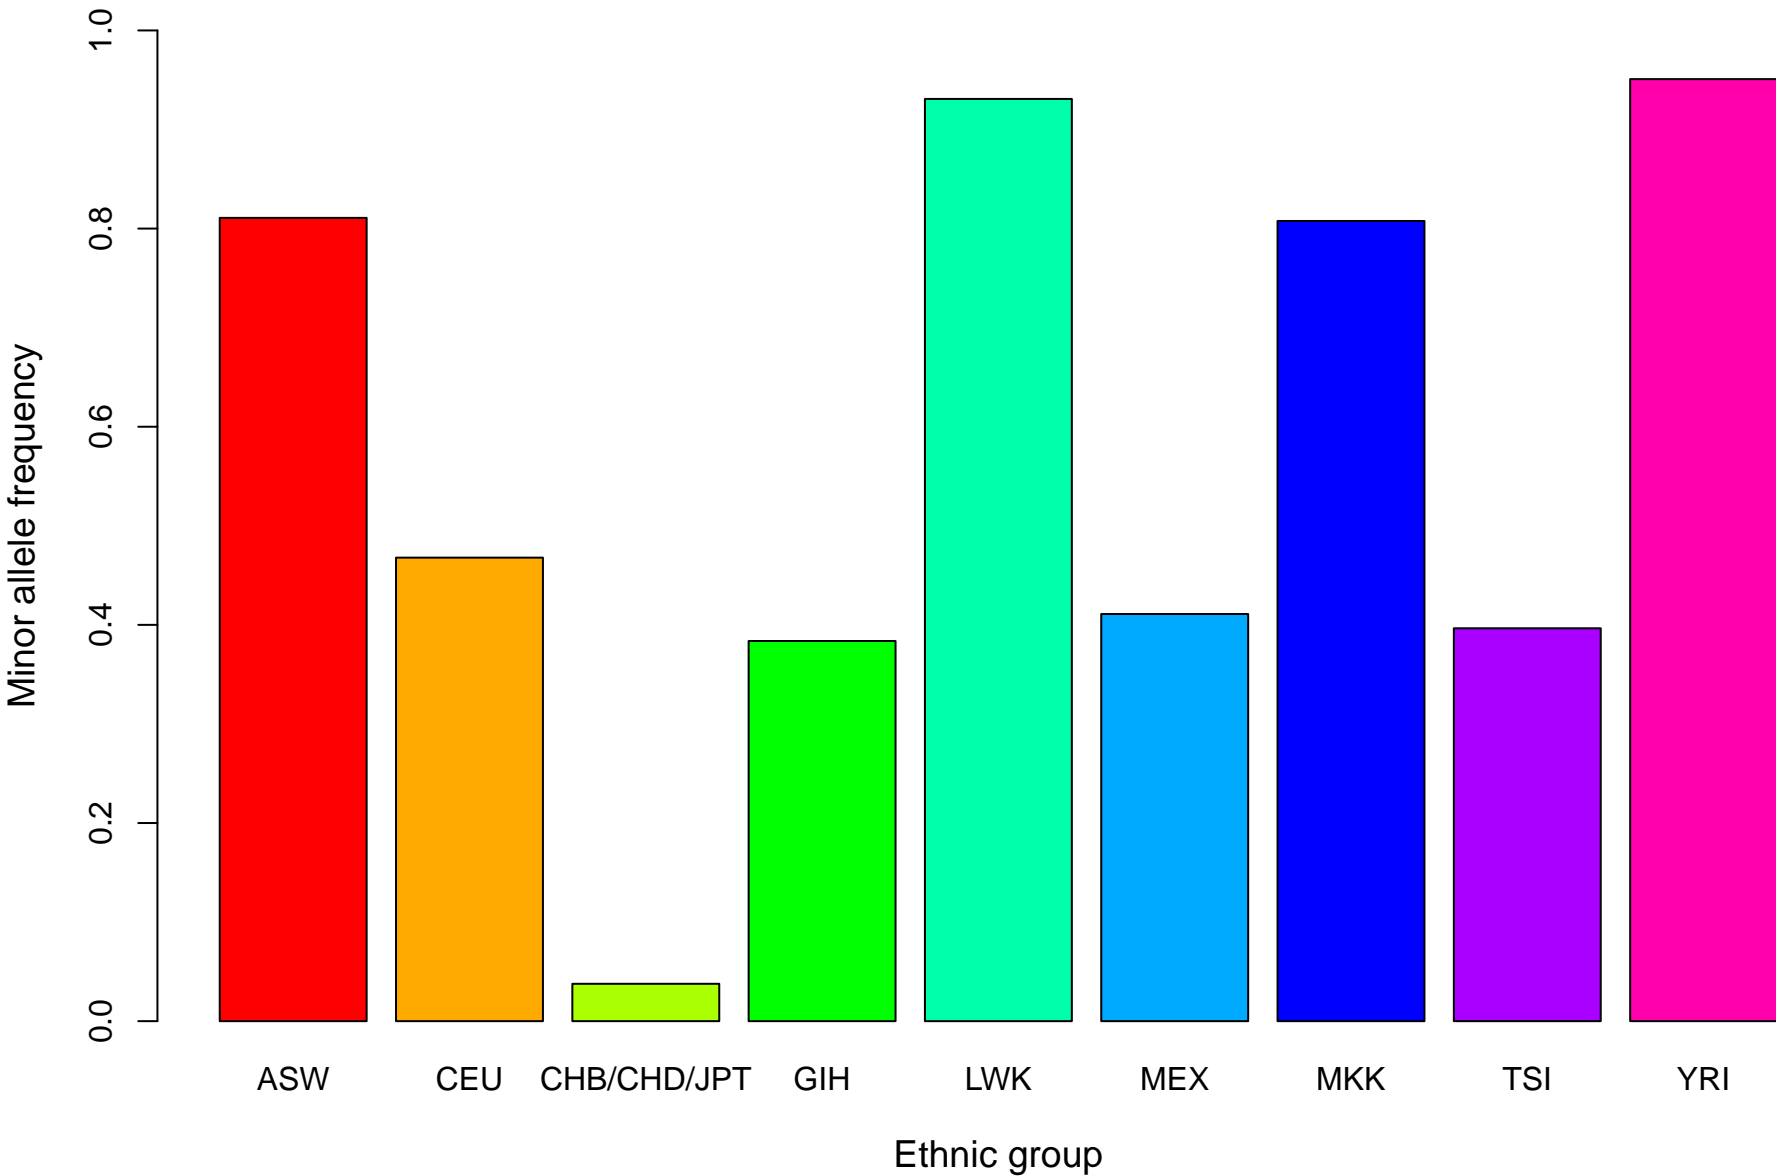

# rs1456235\_T

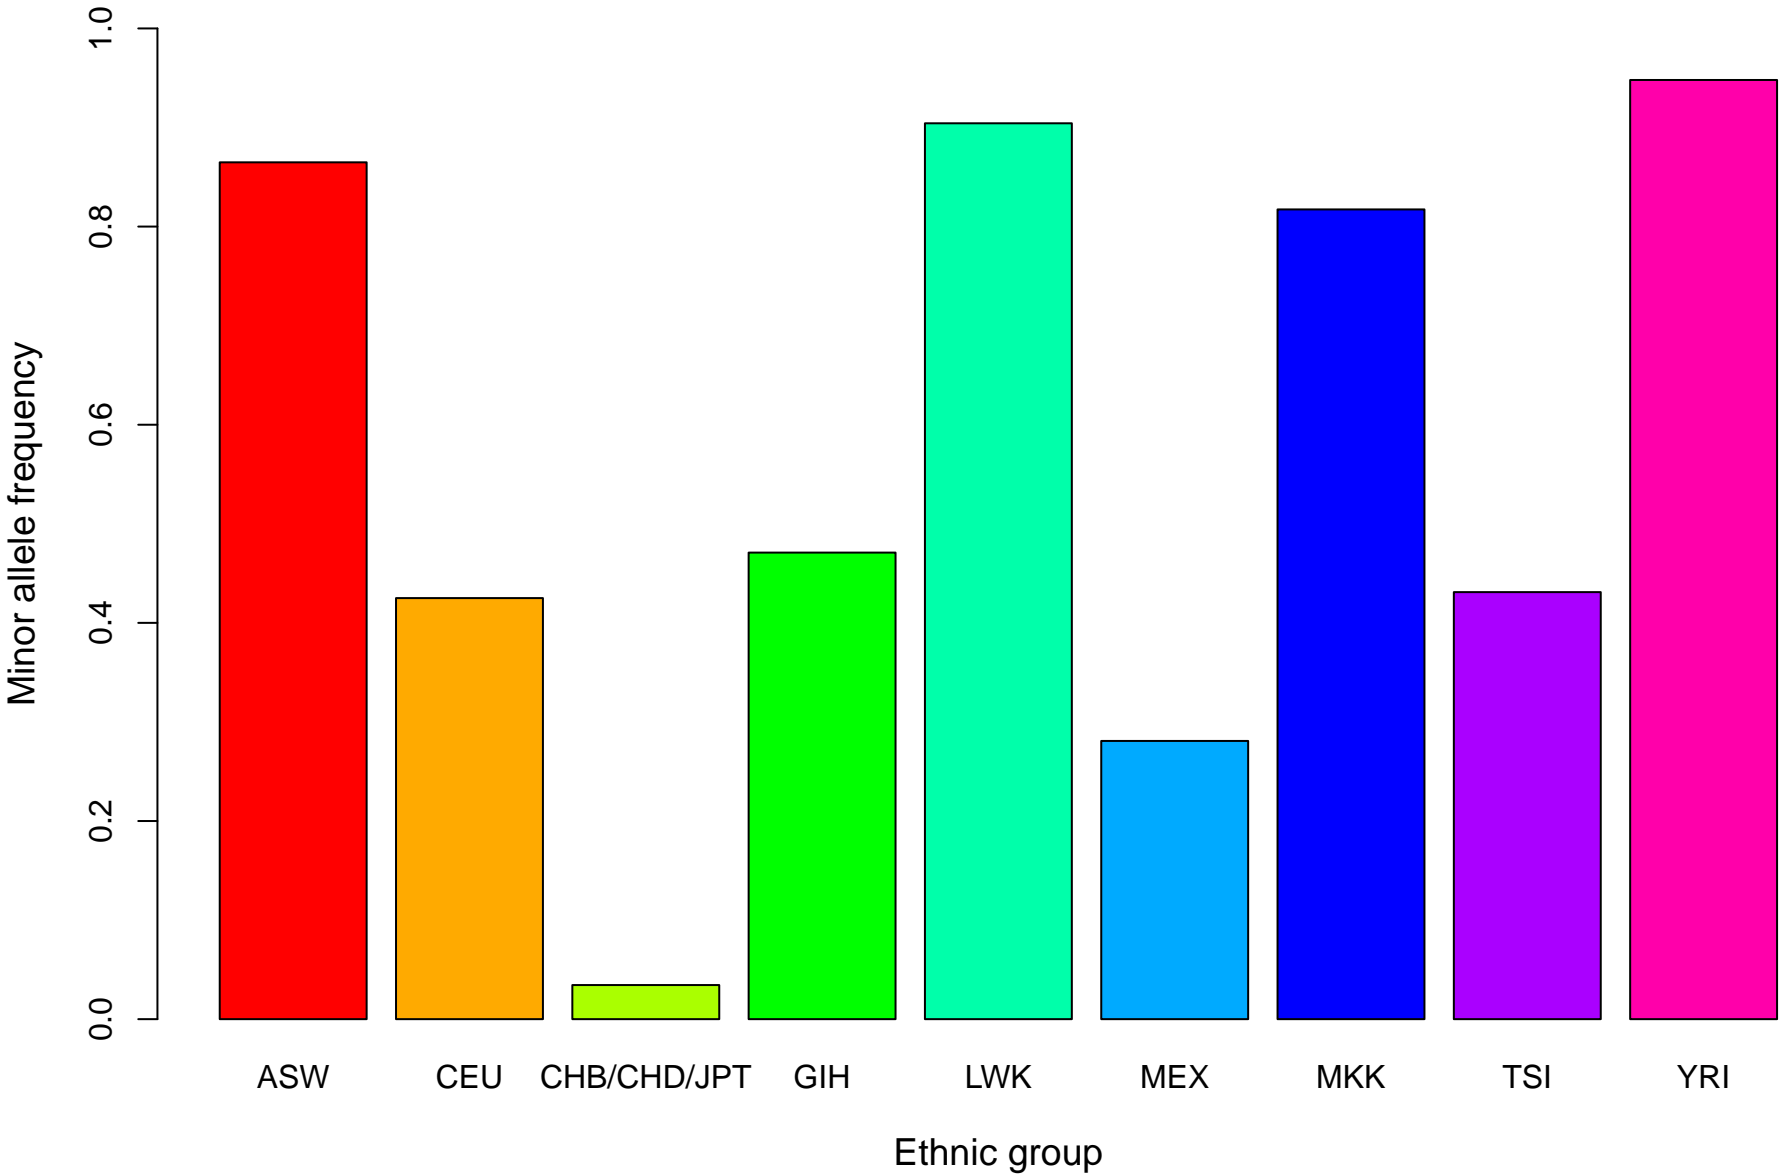

# rs2357566\_T

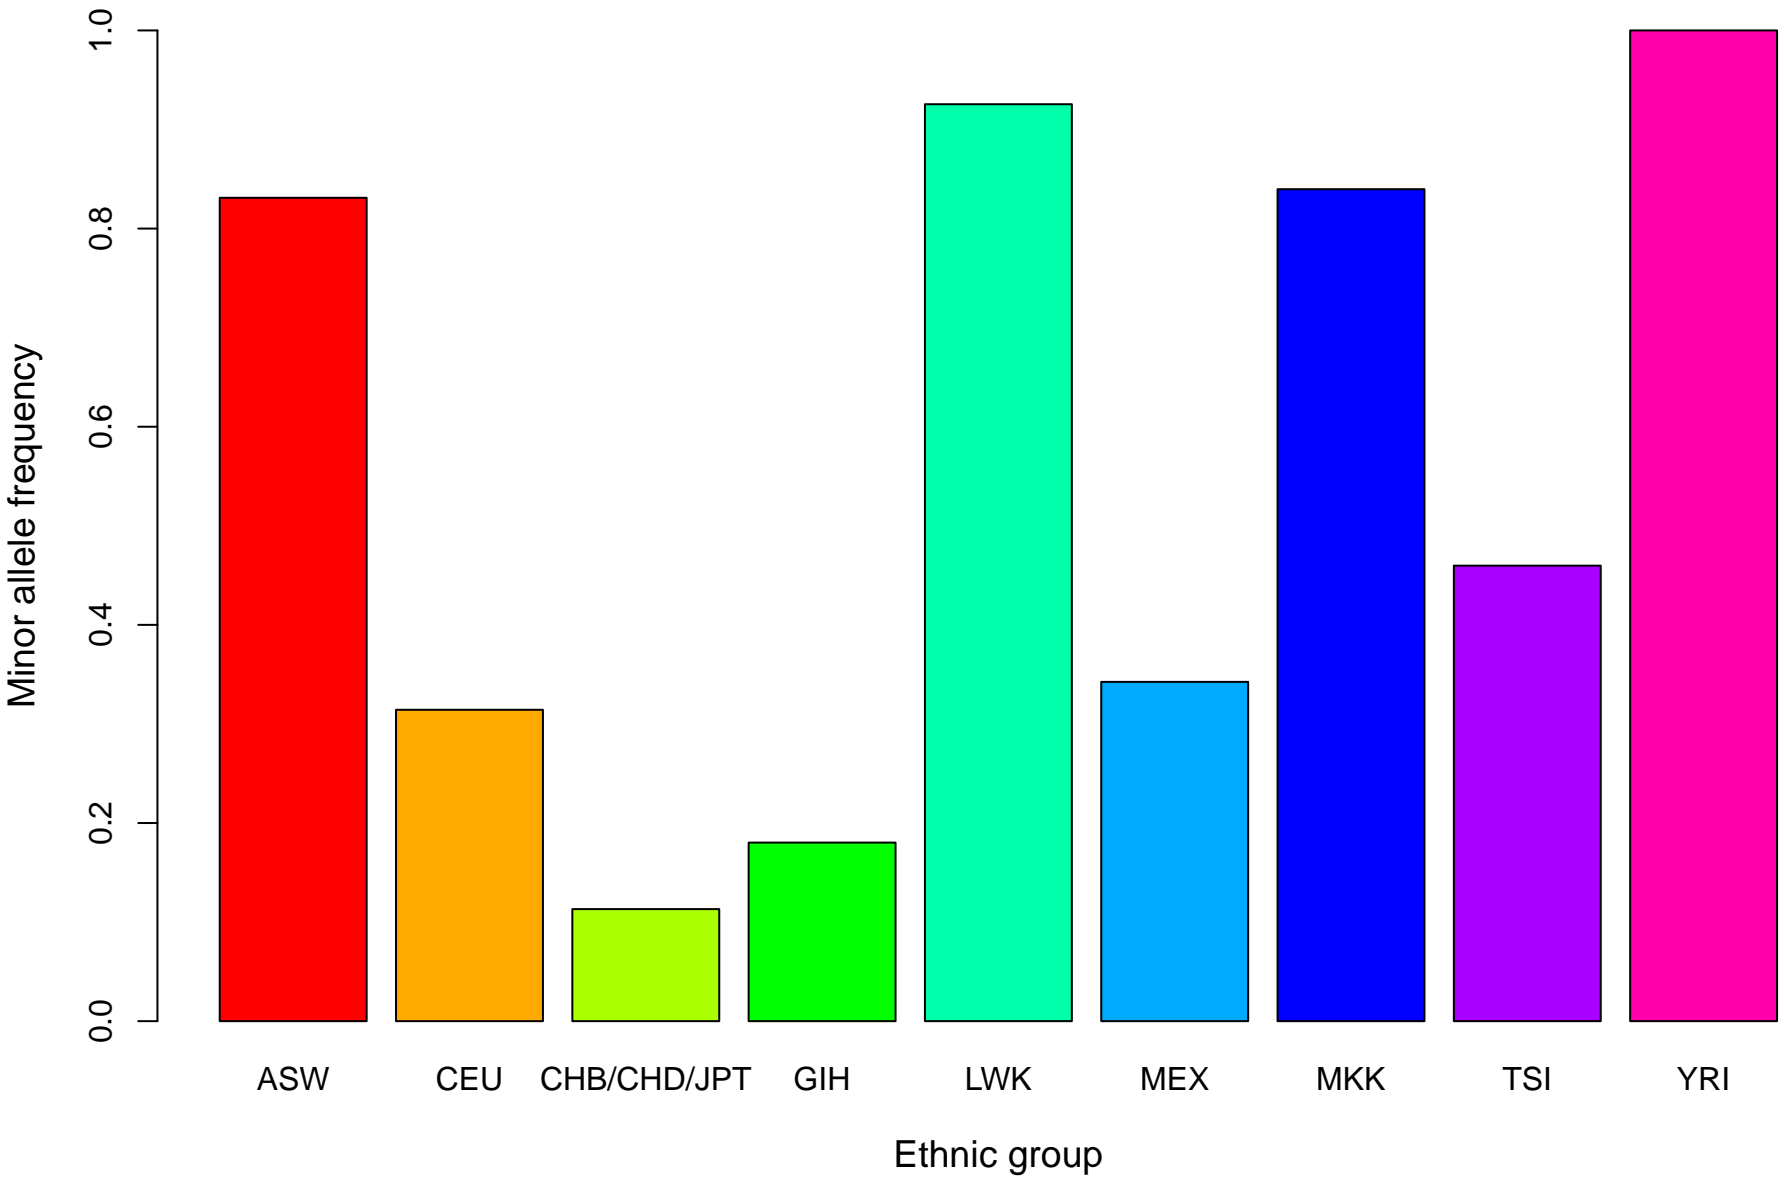

# rs7201030\_A

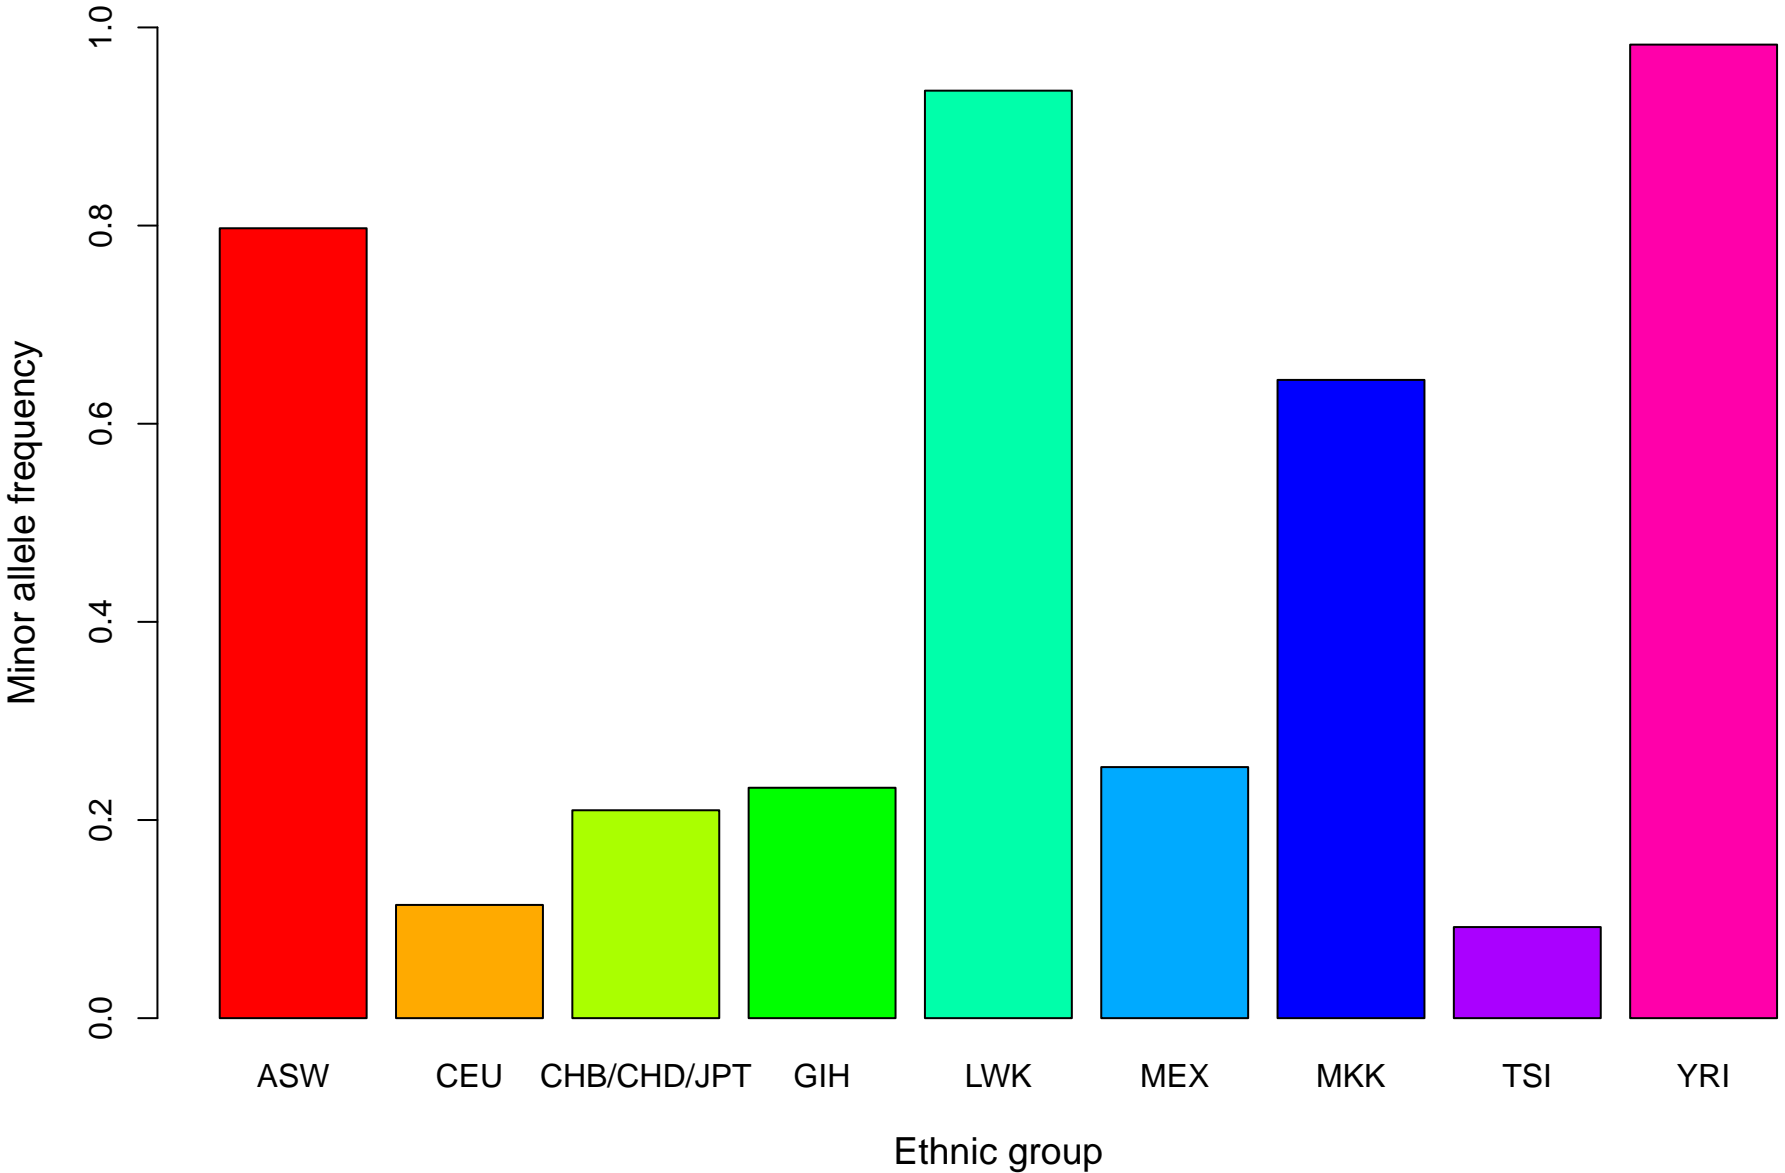



# rs1336535\_A

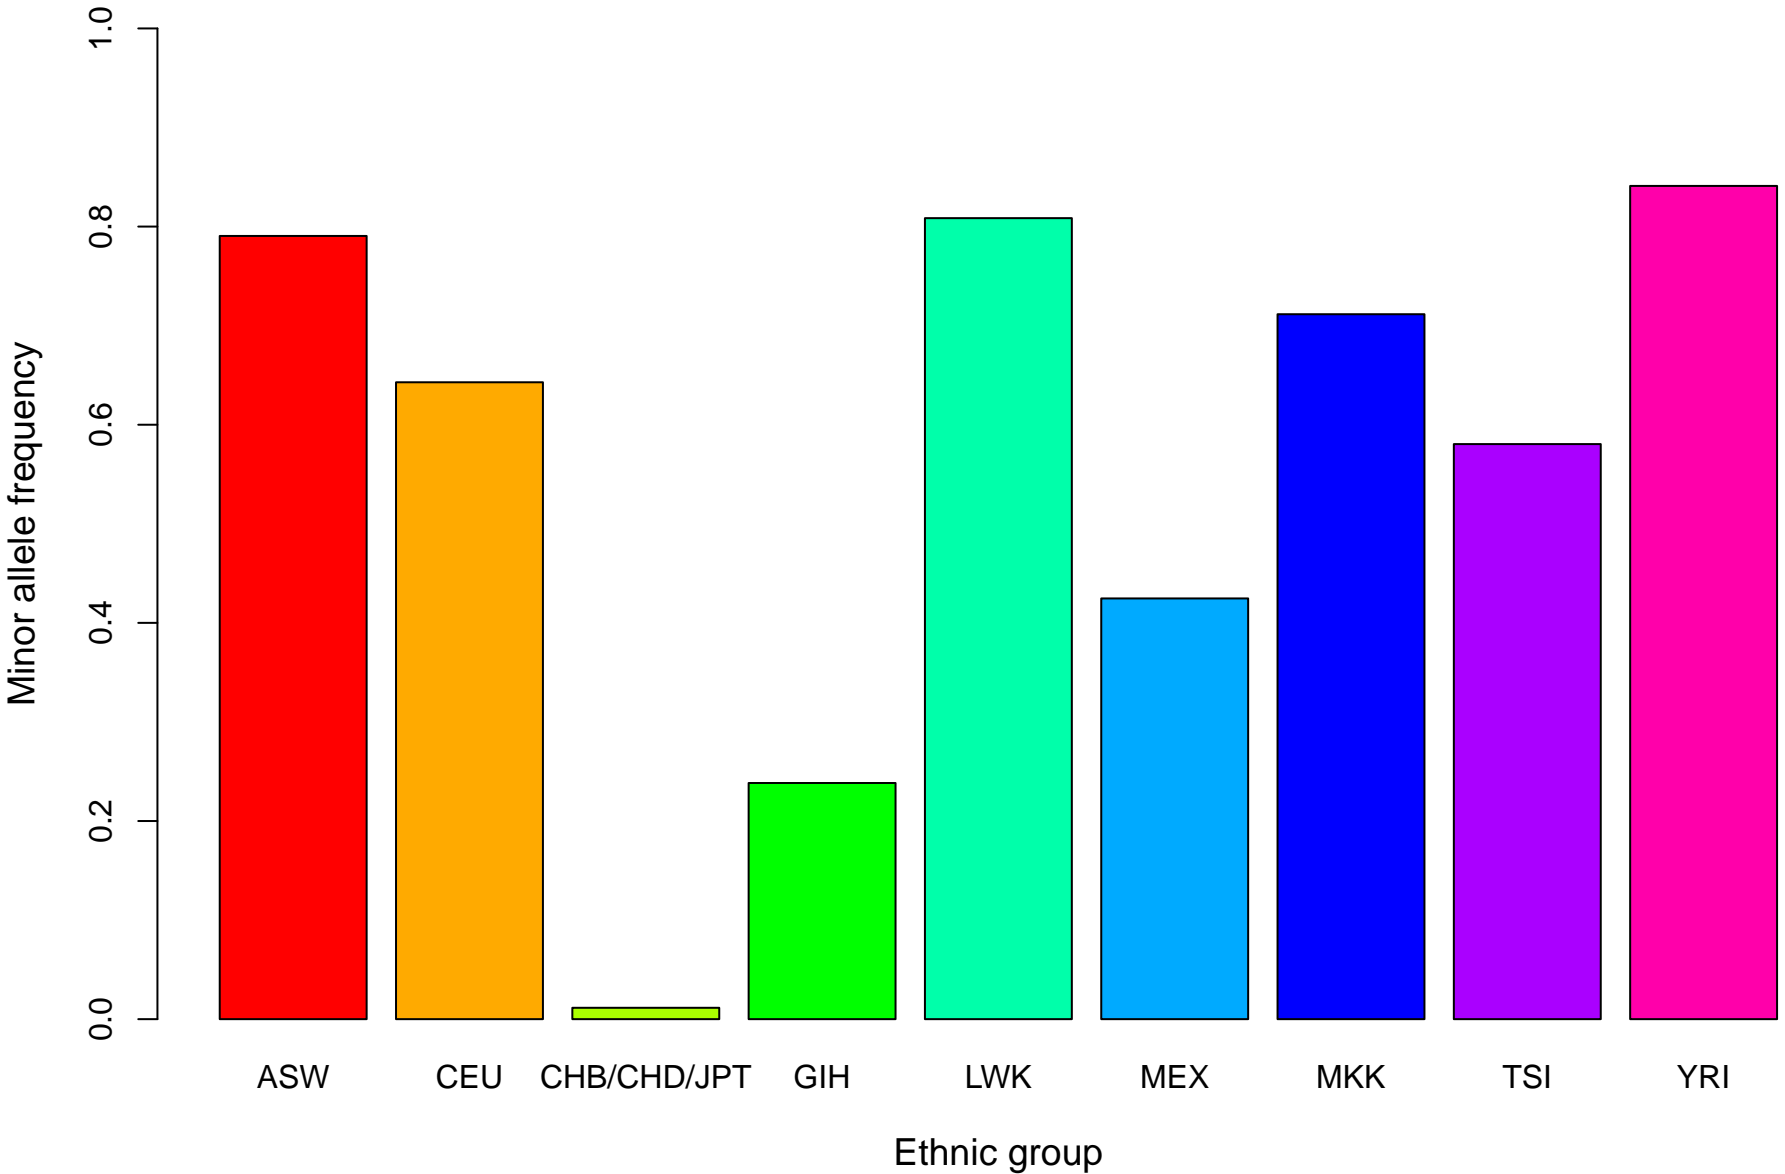

# rs3768641\_G

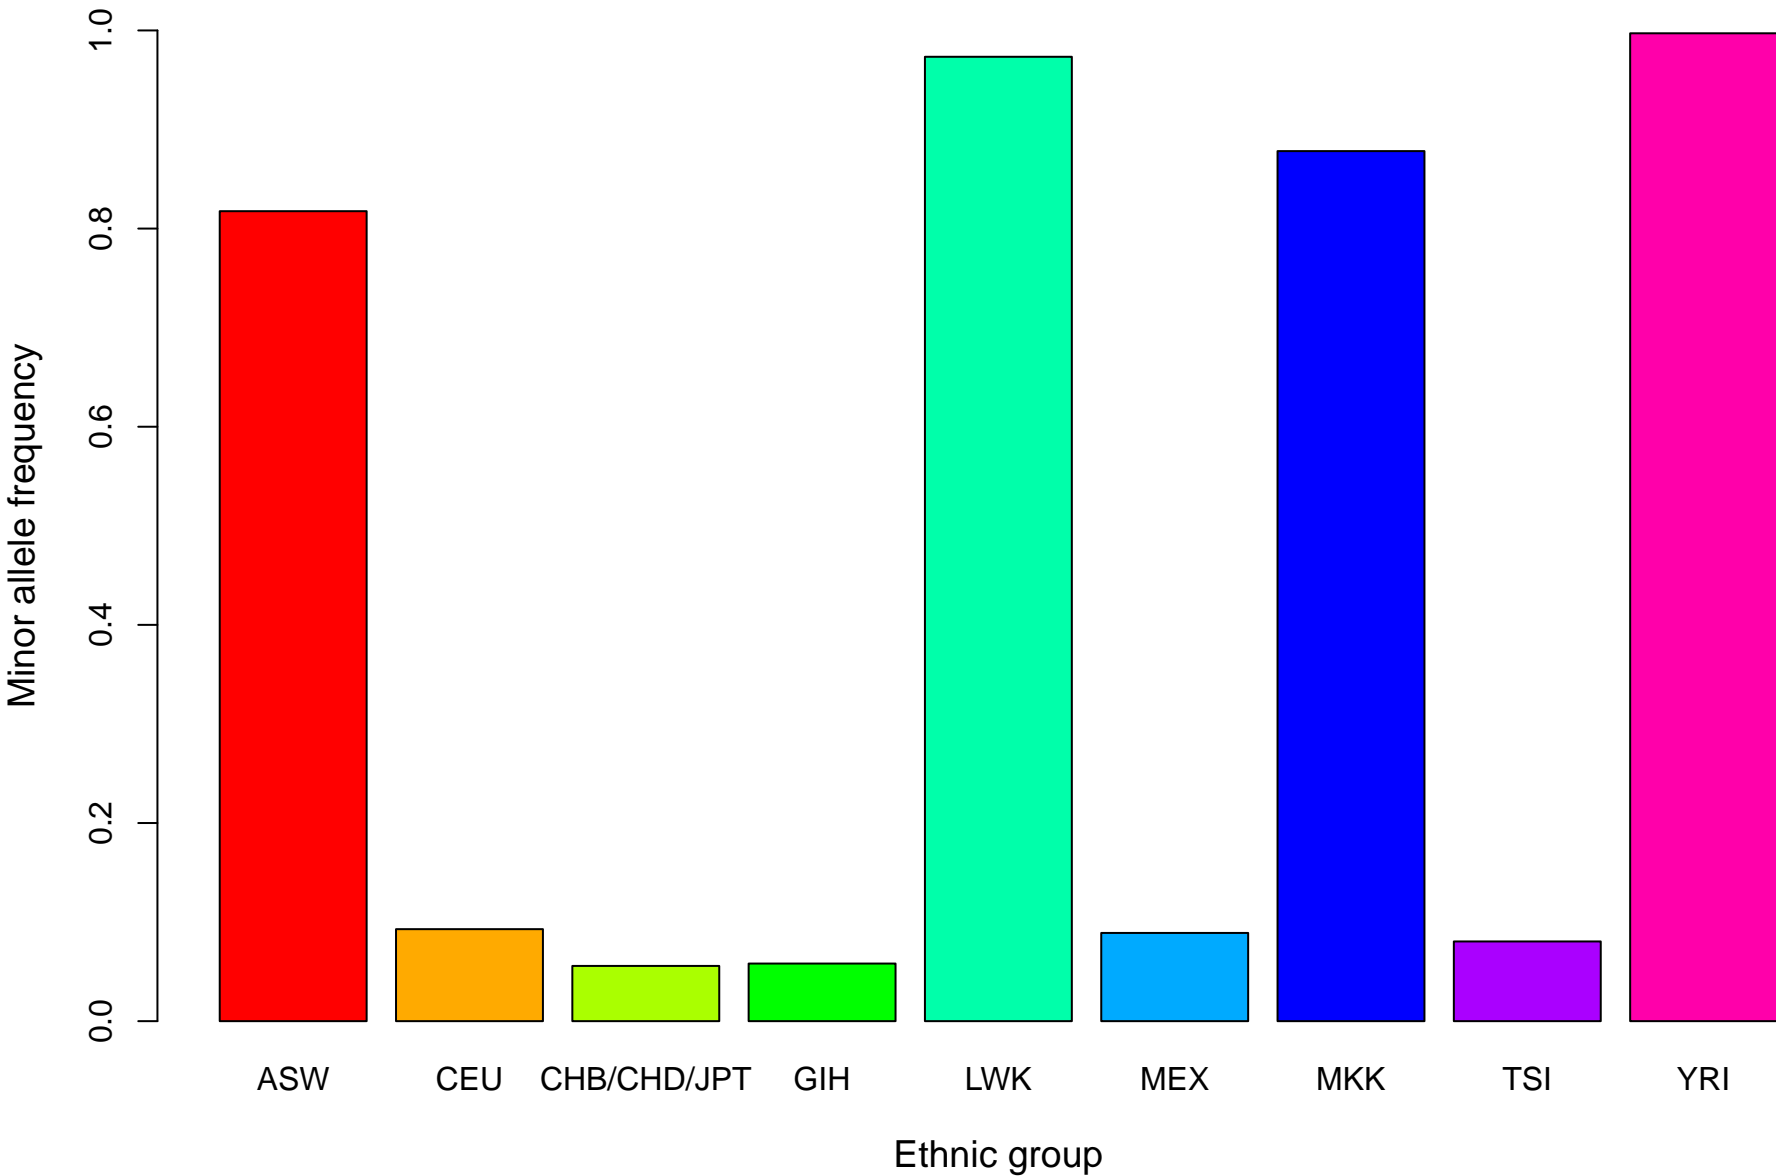

# rs6595029\_A

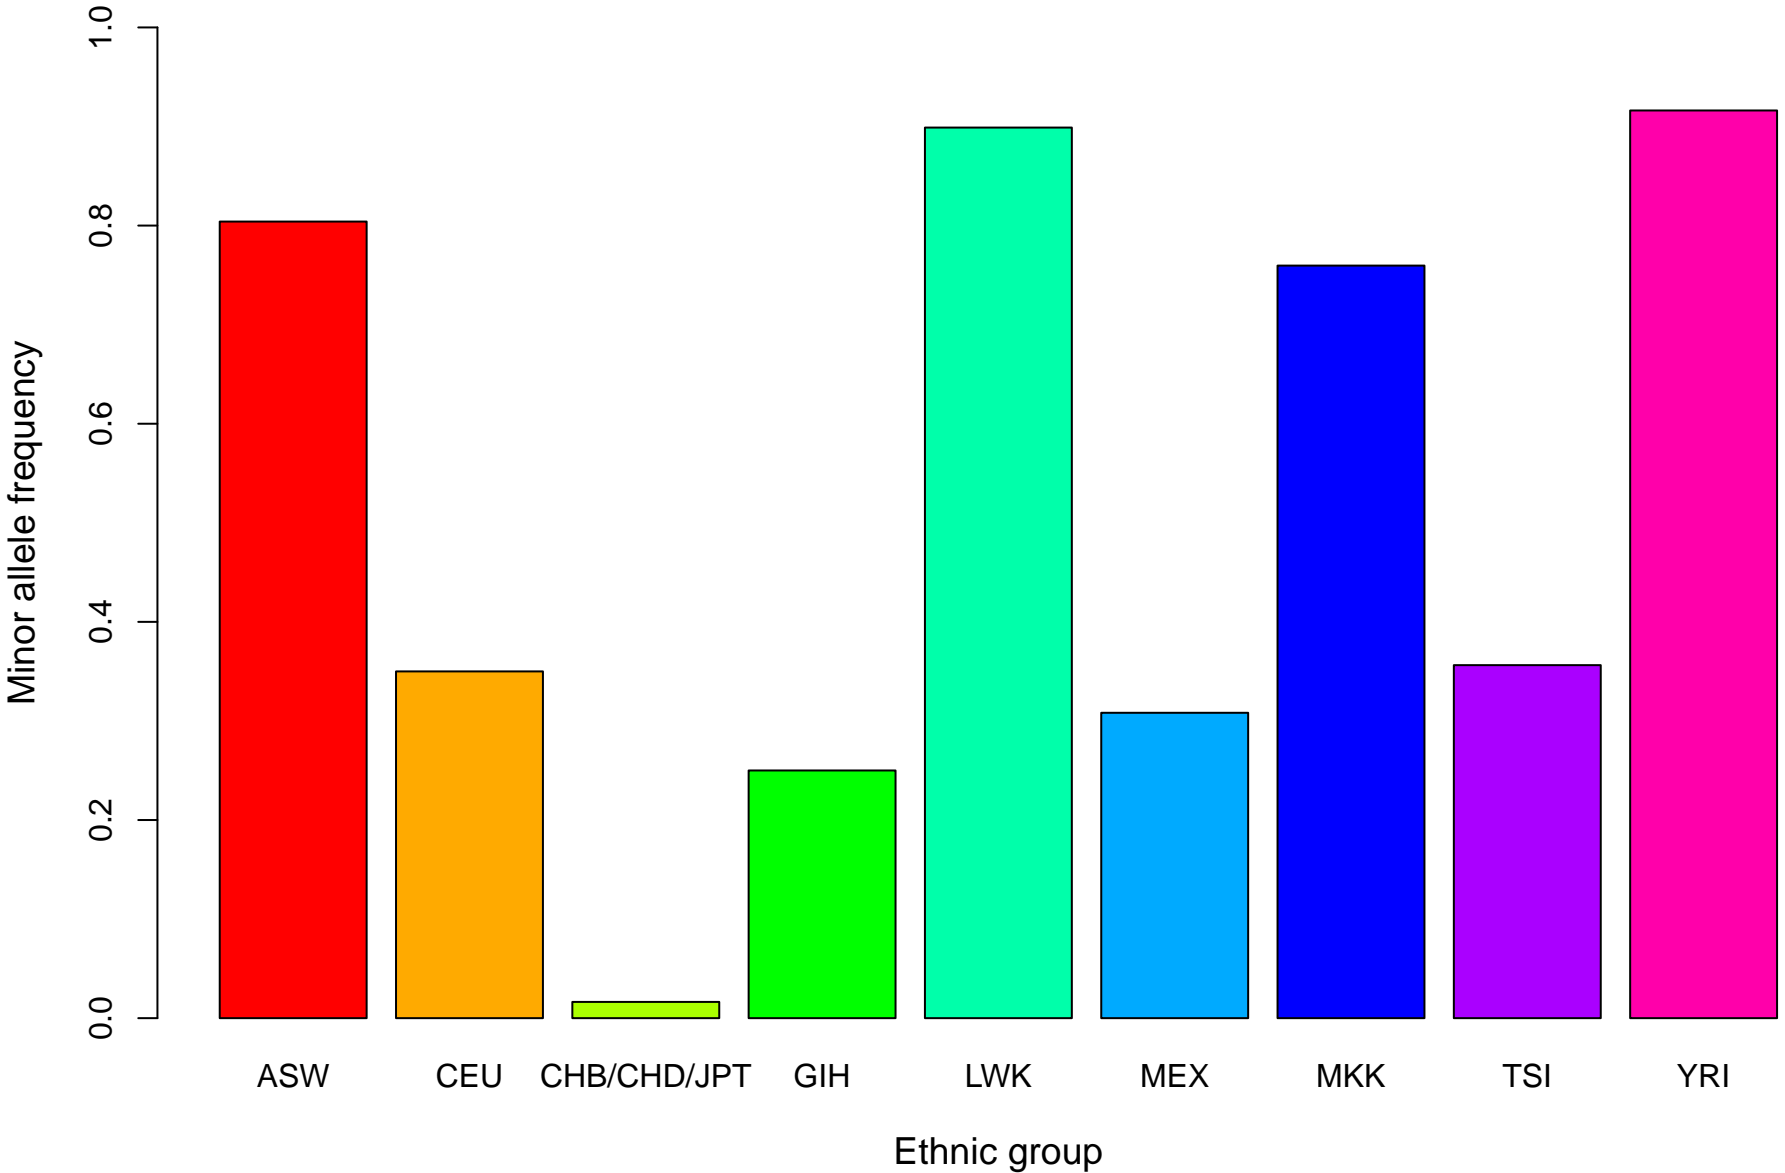

# rs7908640\_C

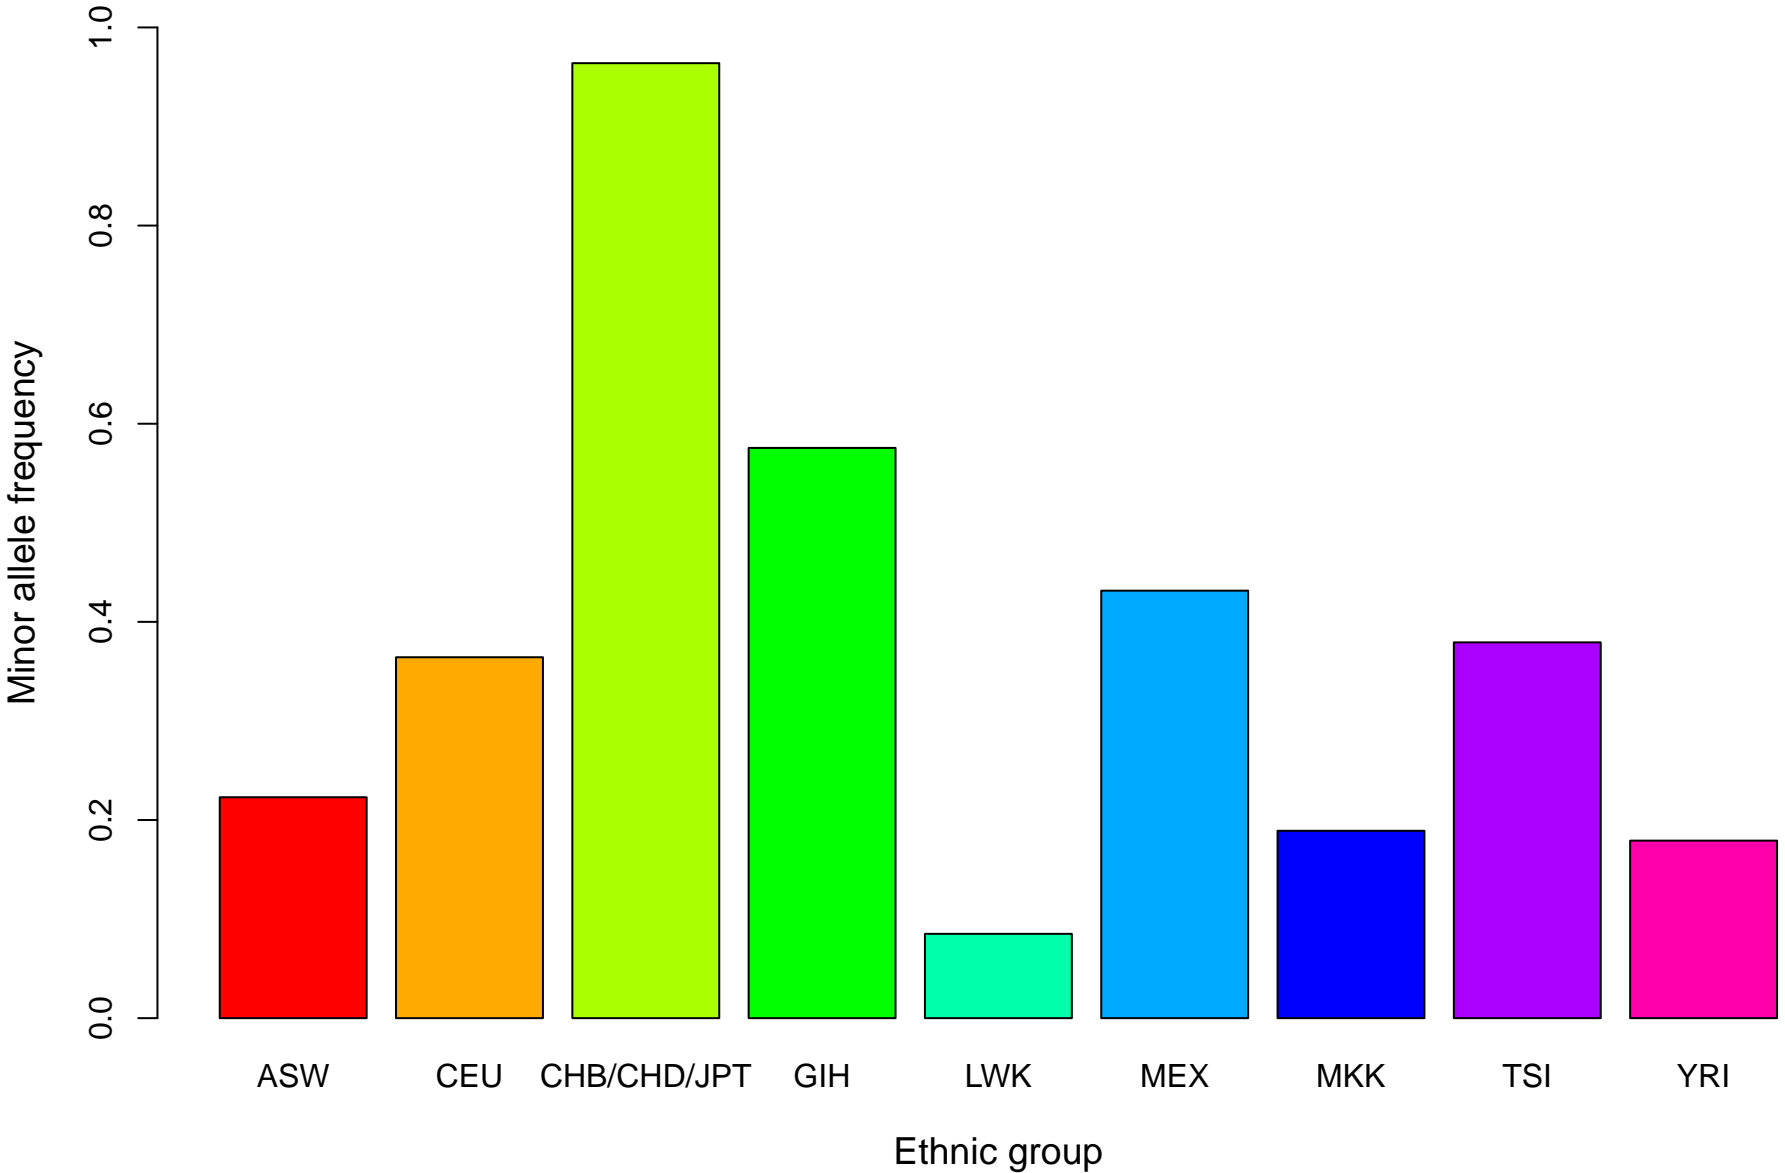

# rs7008113\_A

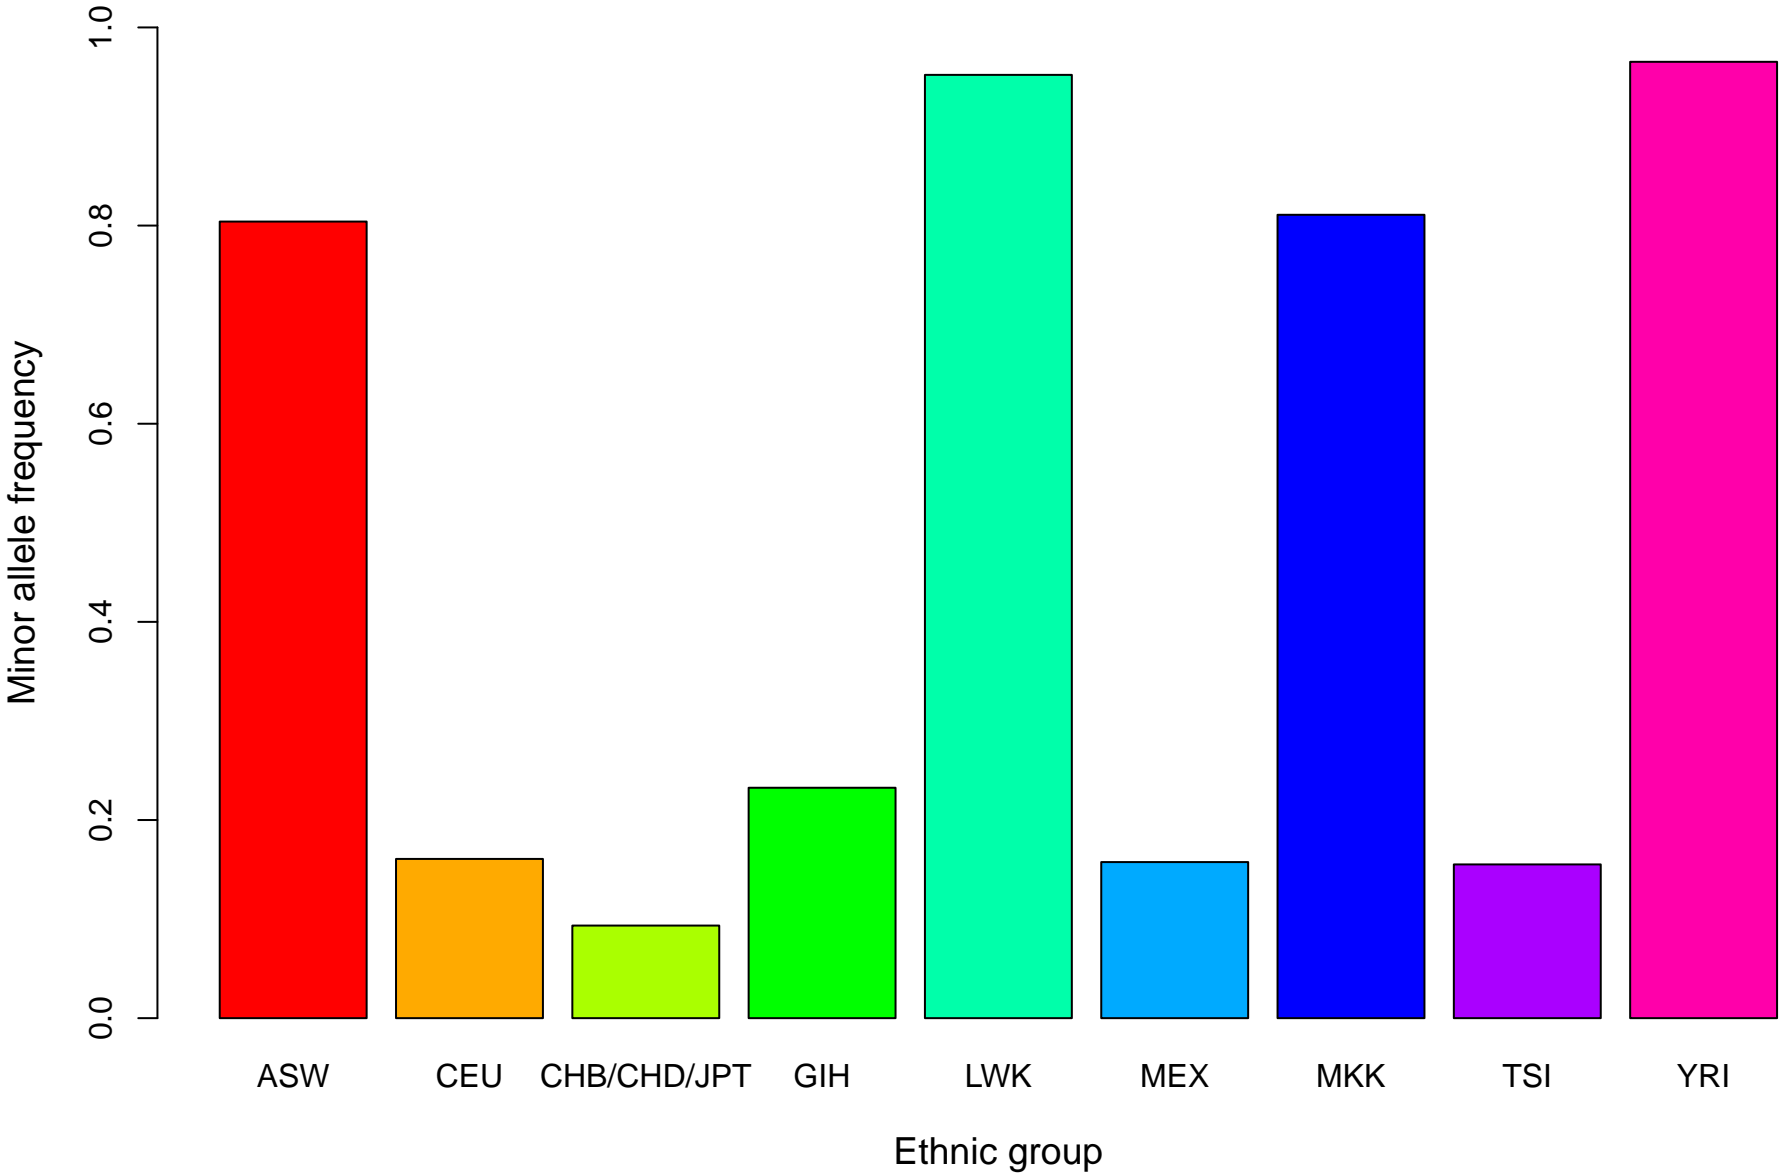

# rs10848765\_C

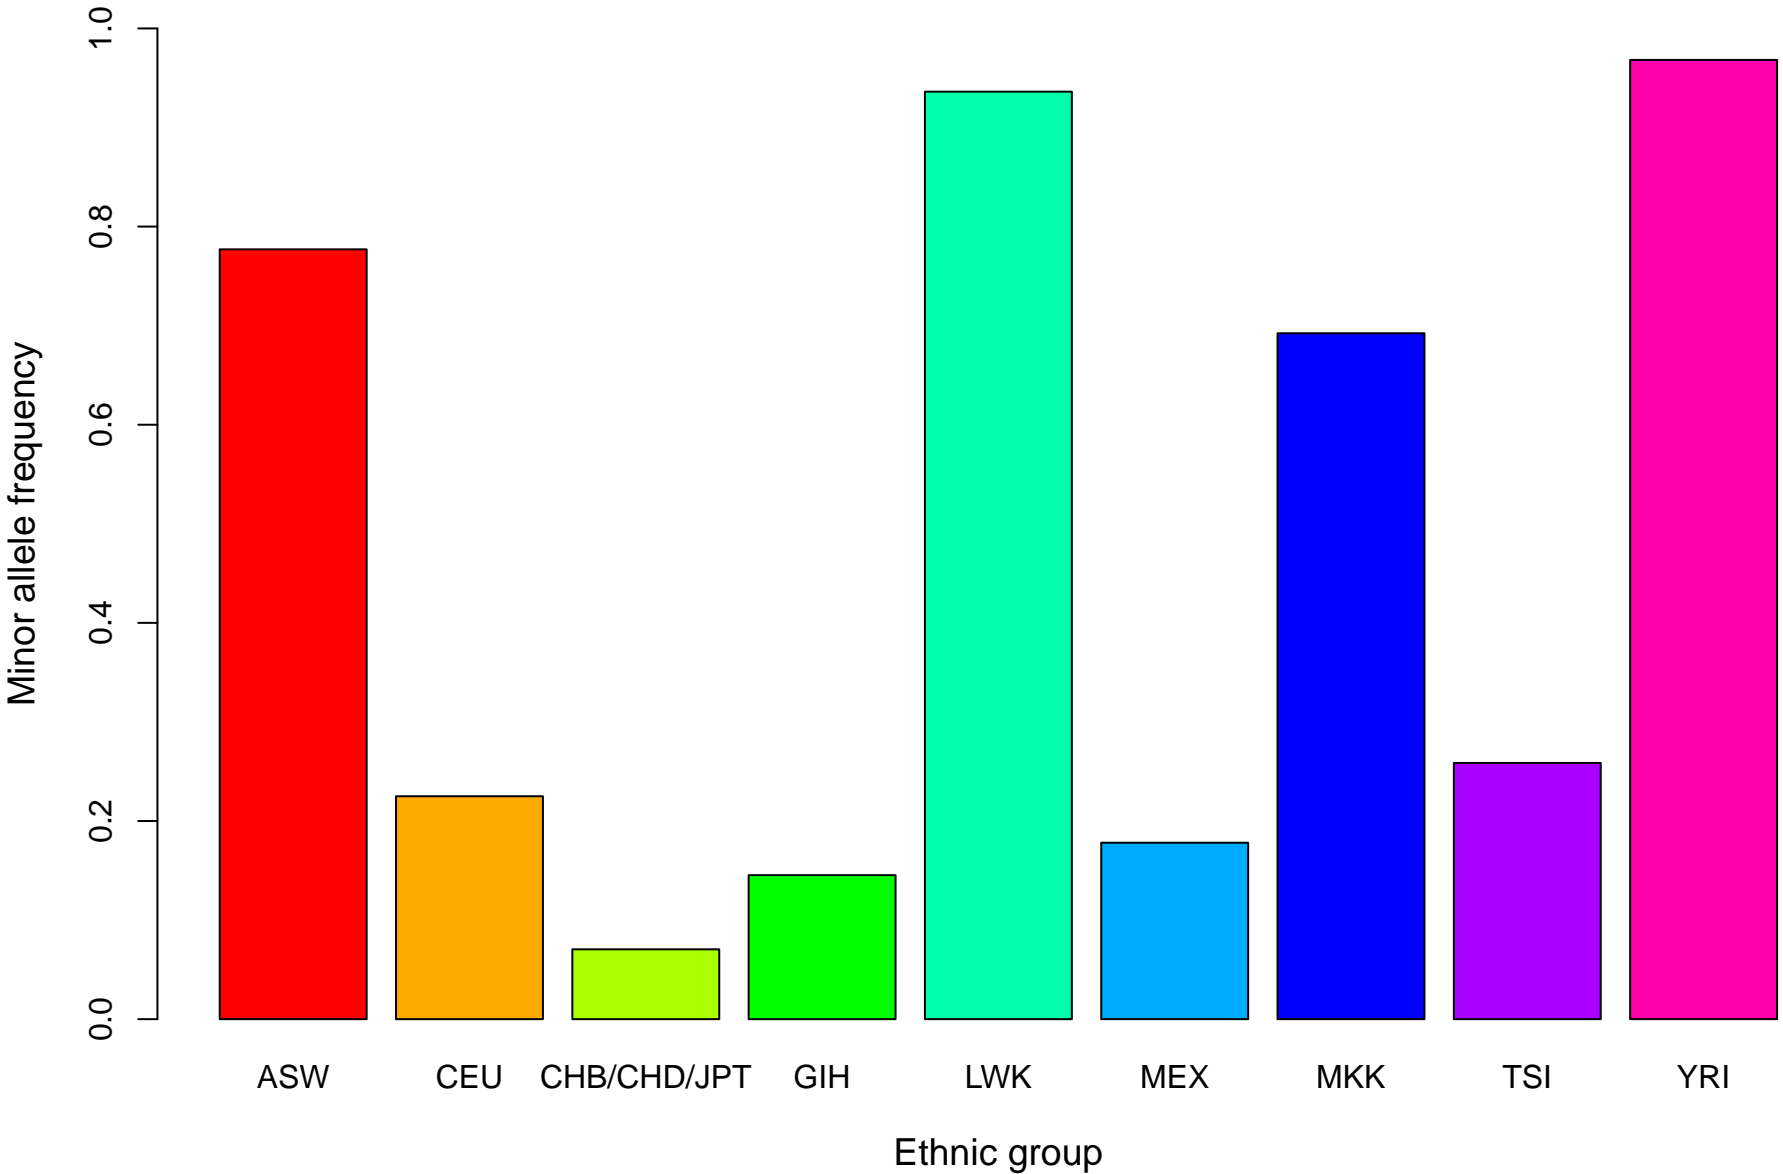

# rs12570342\_T

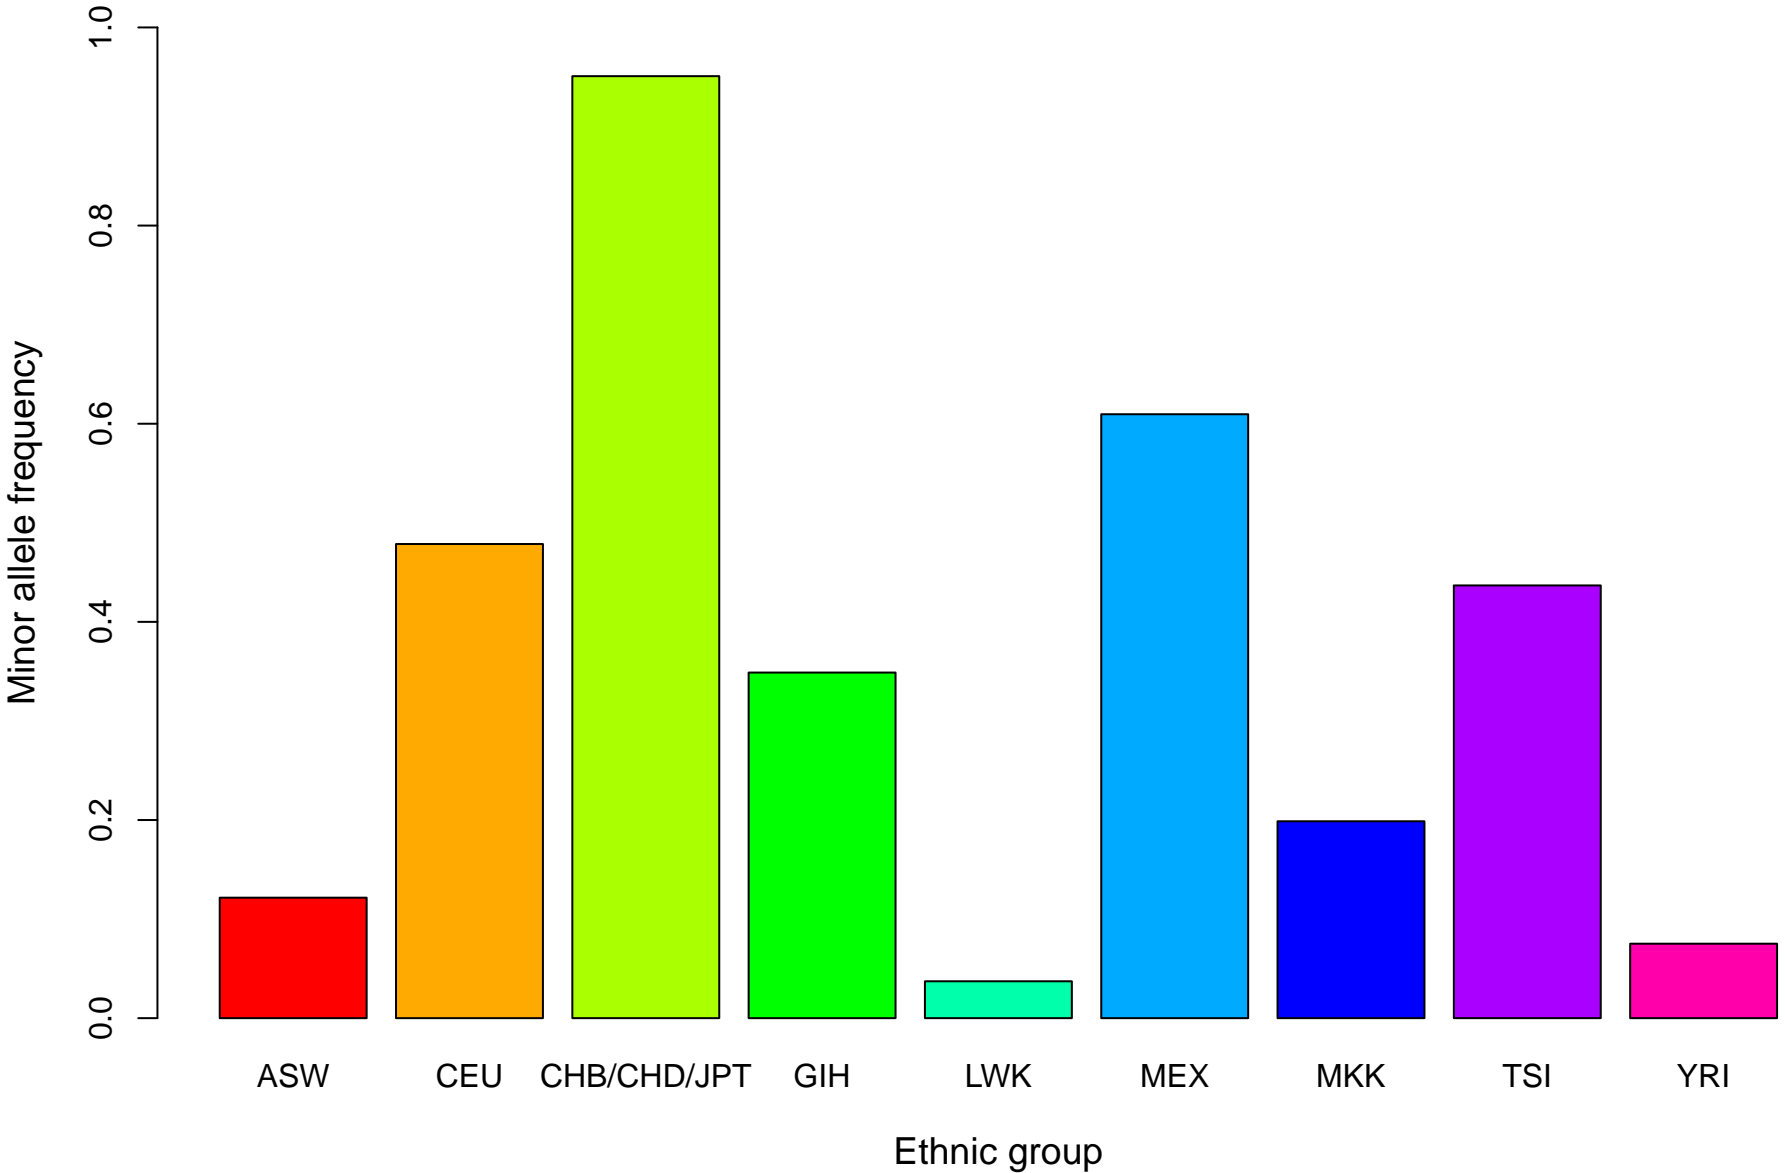

# rs2052074\_G

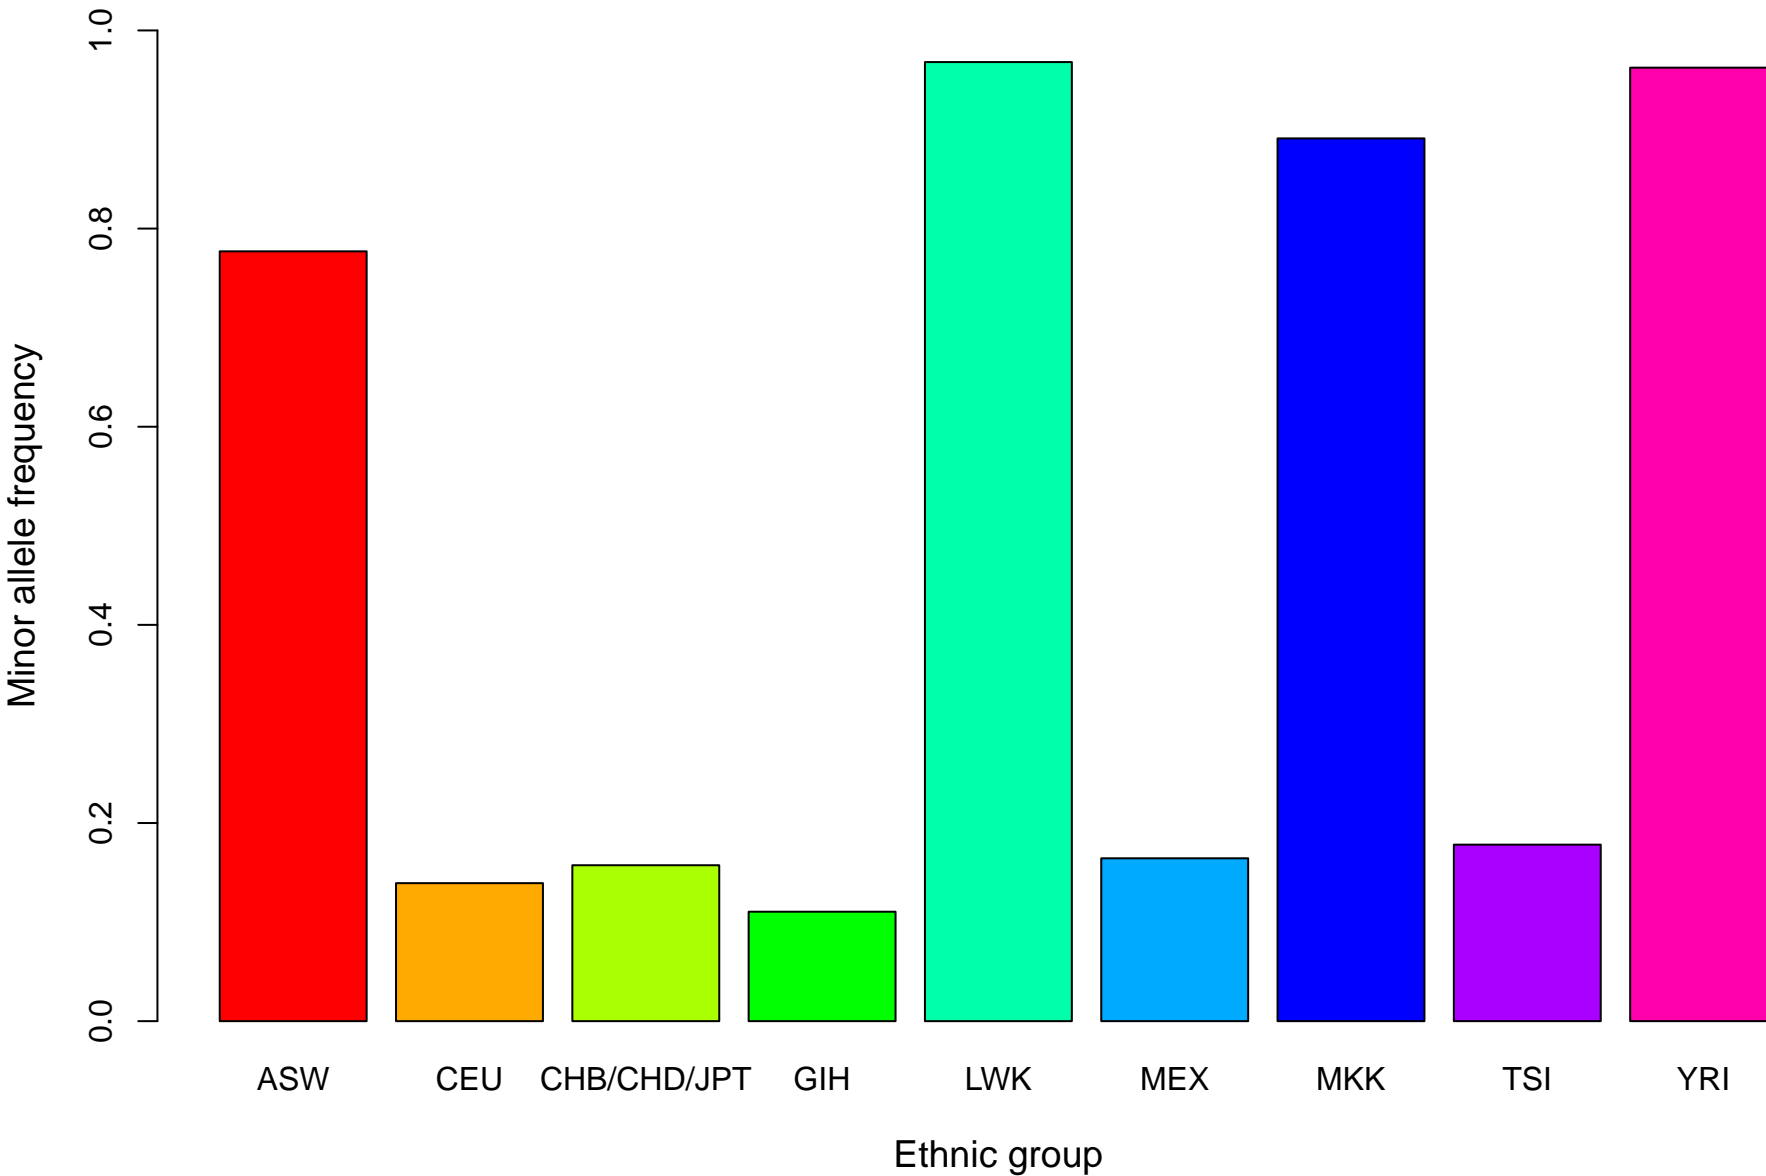



# rs261532\_G

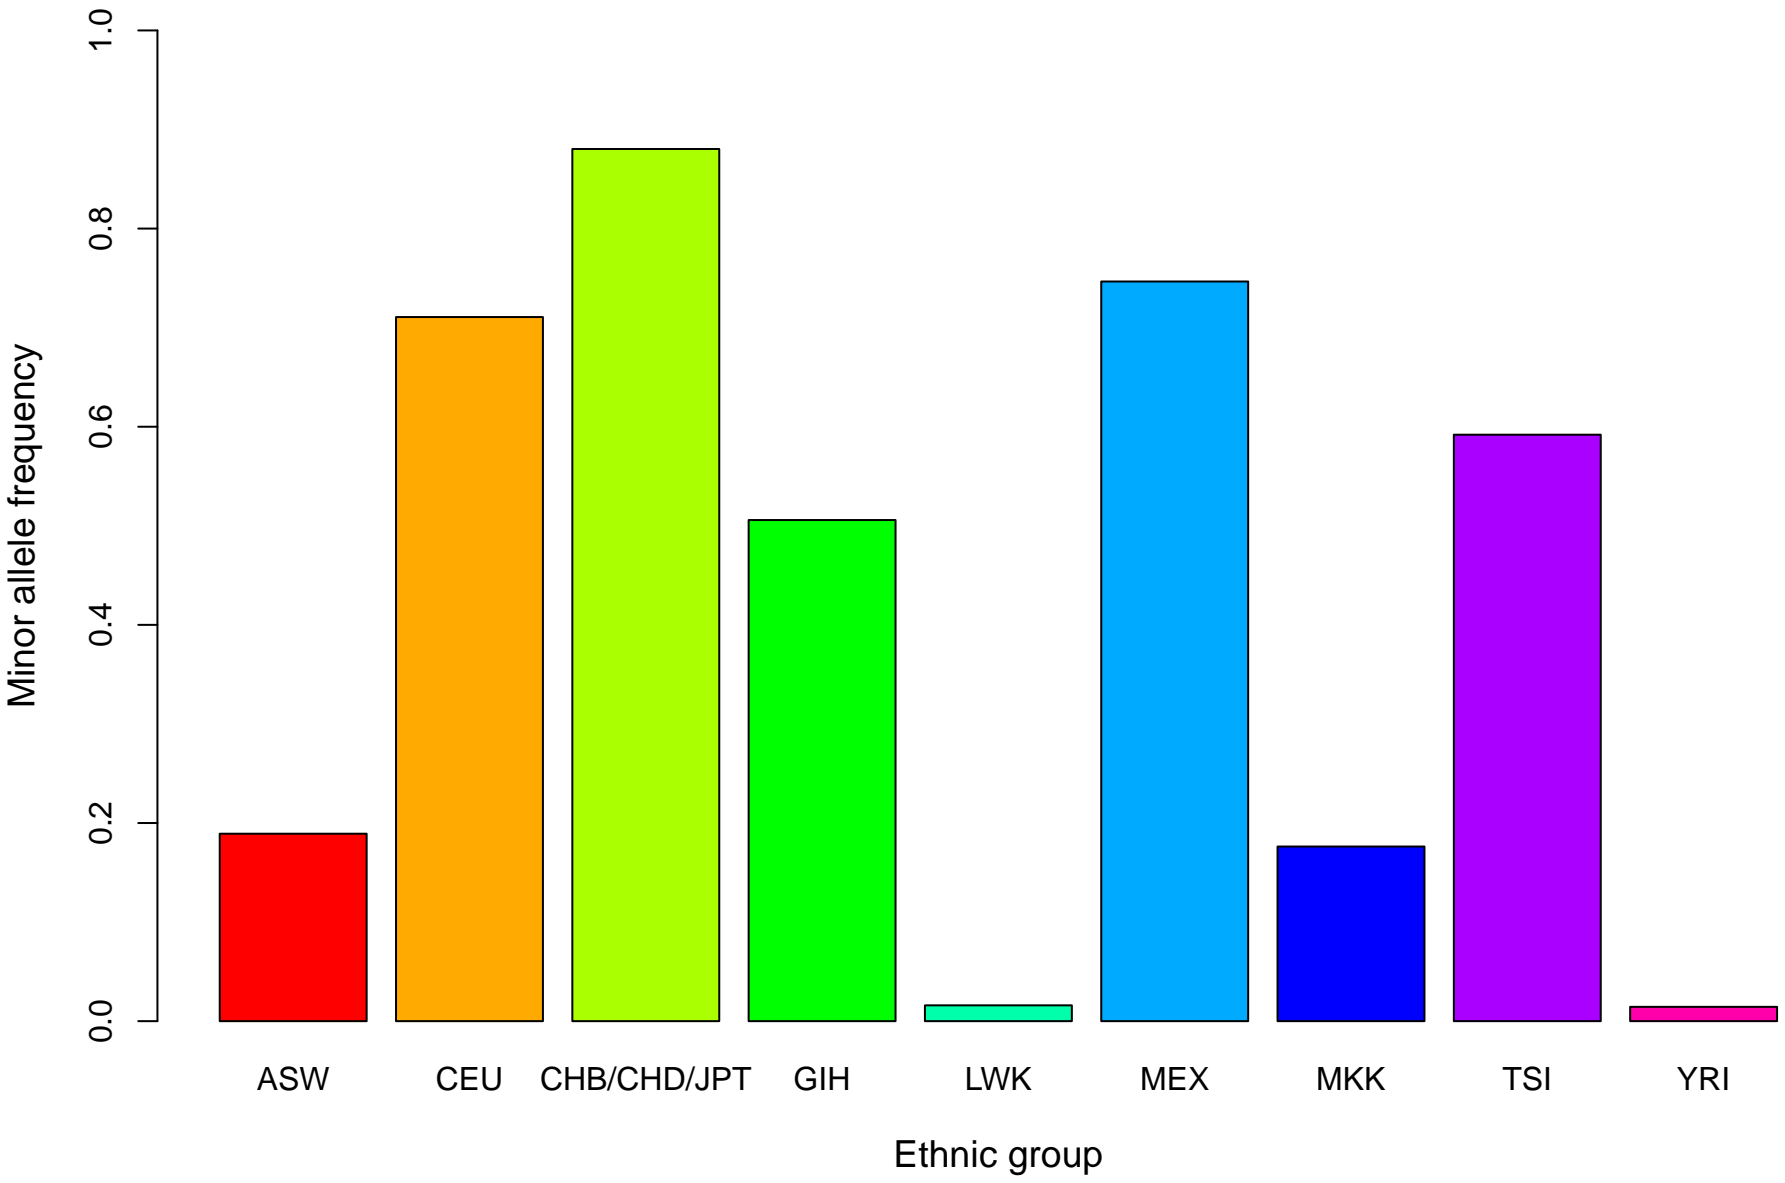

# rs9410307\_C

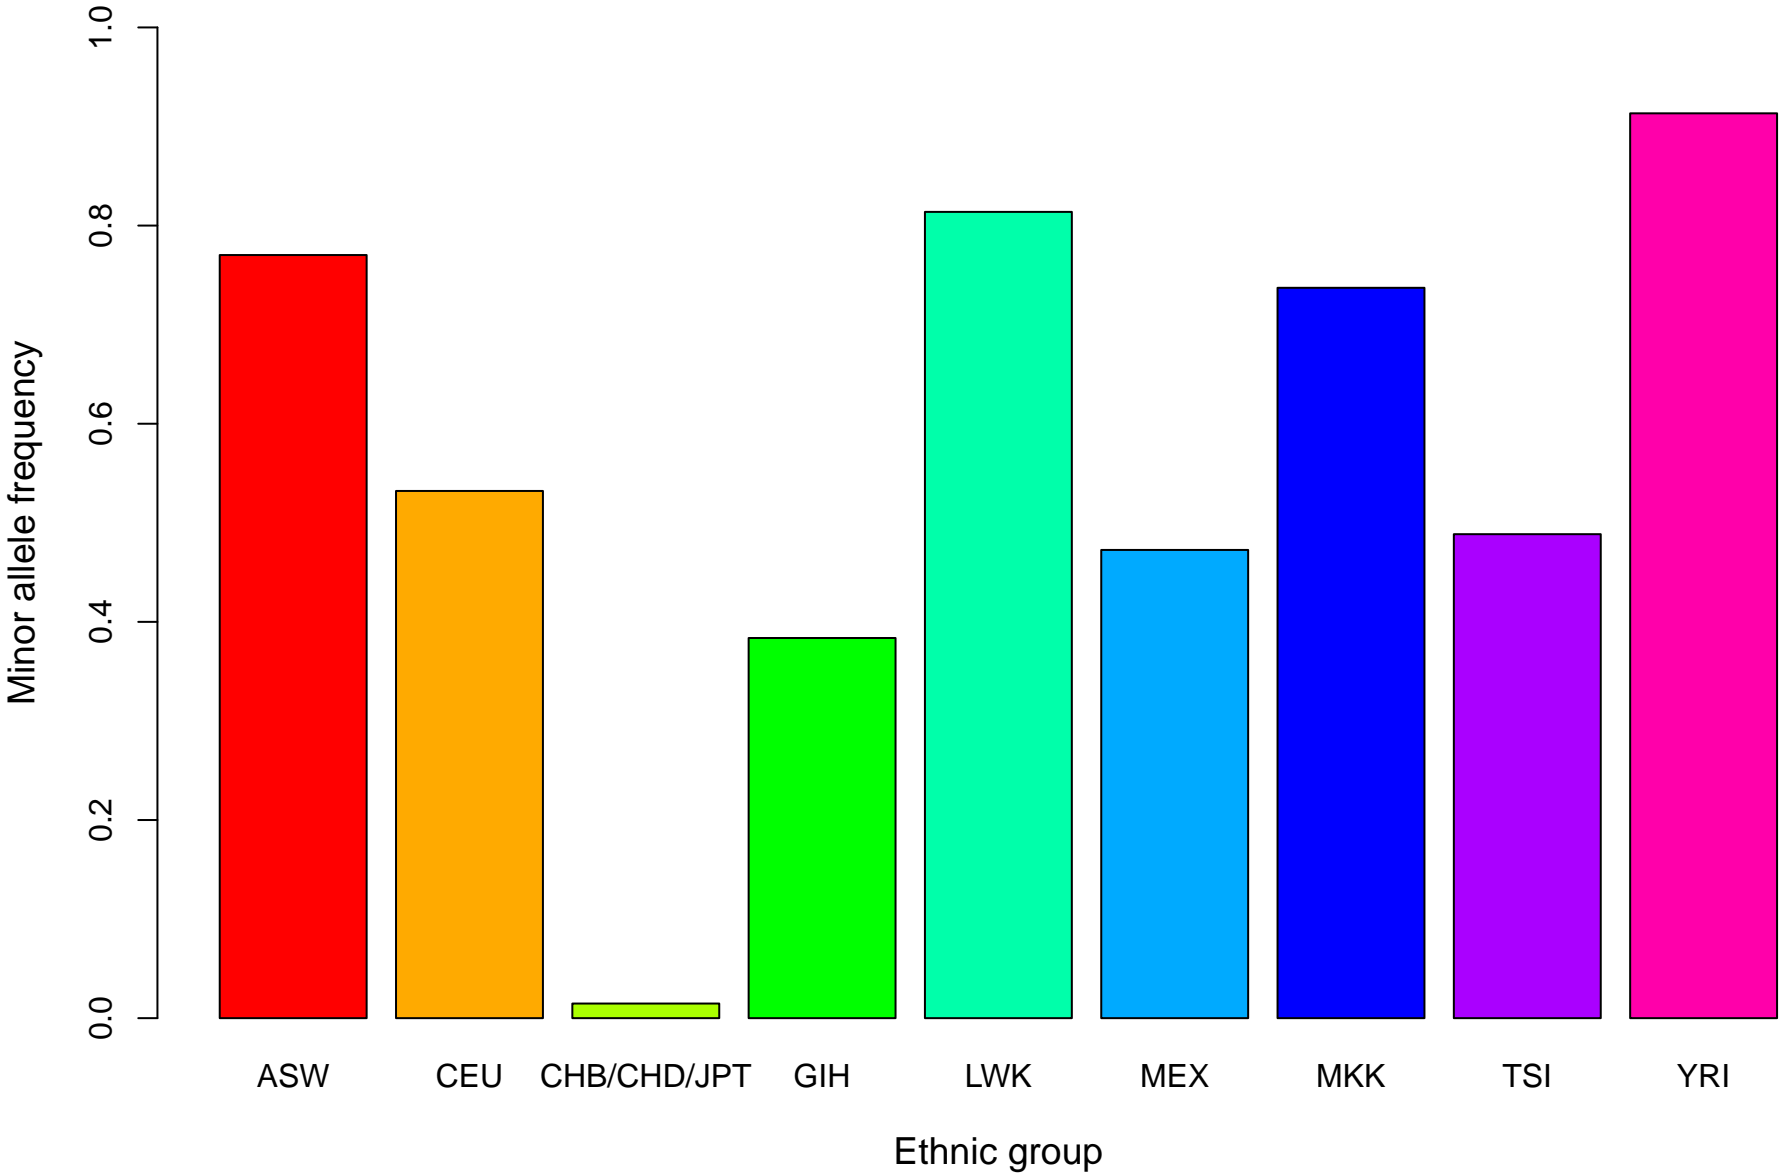

# rs1154761\_A

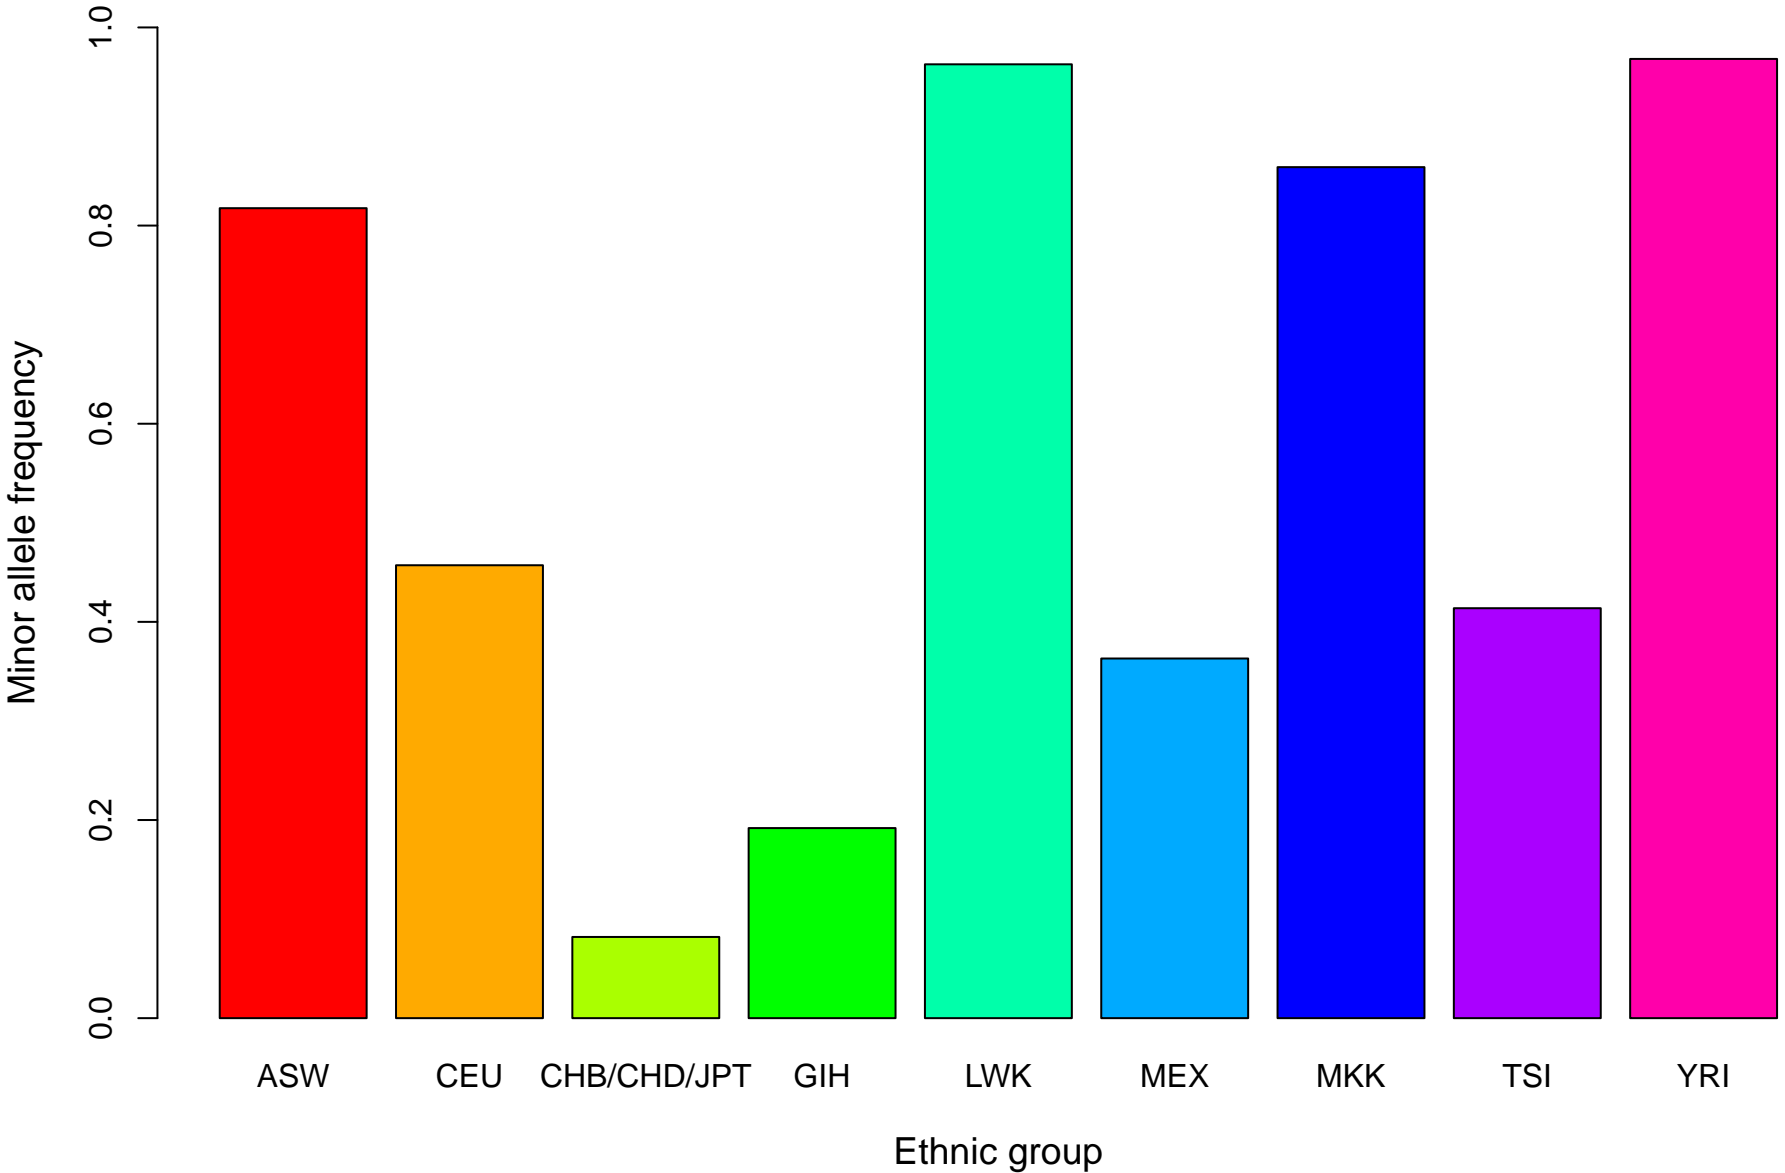

# rs1866134\_C

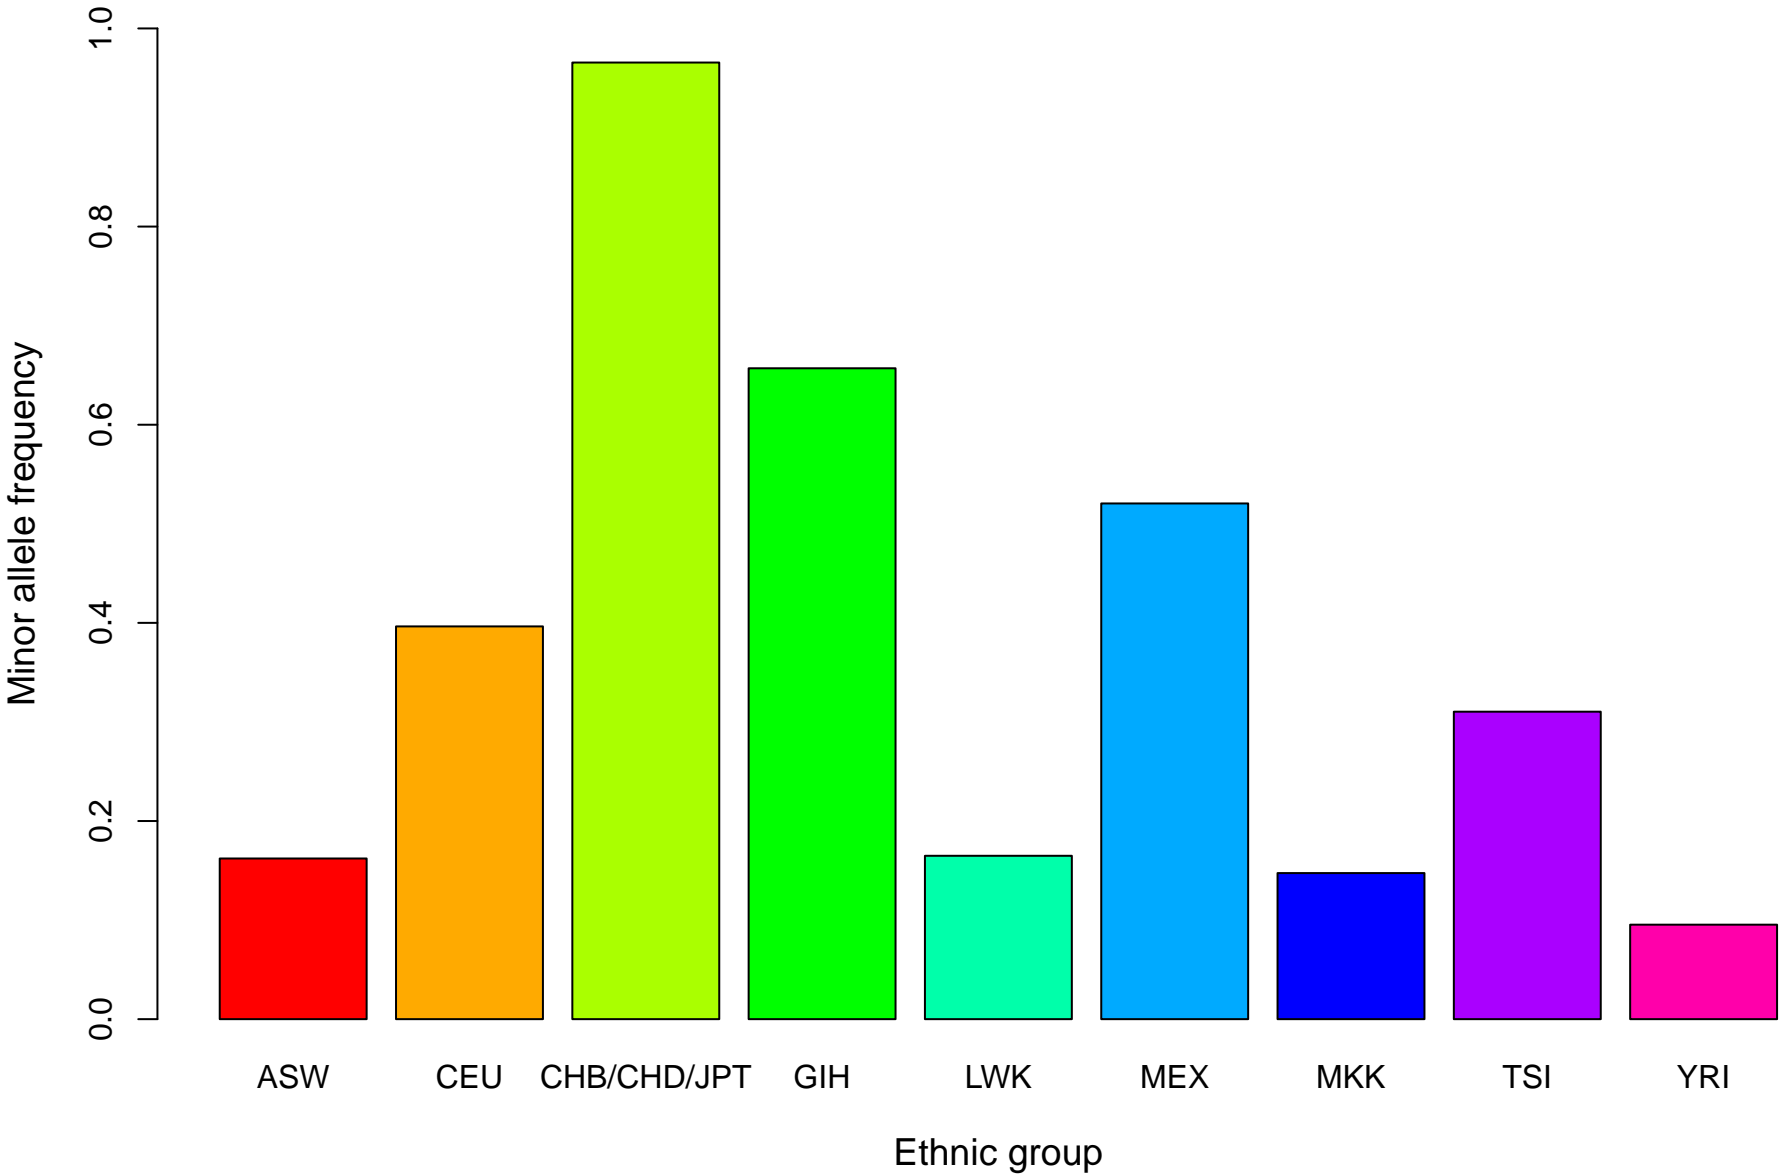

# rs3813227\_T

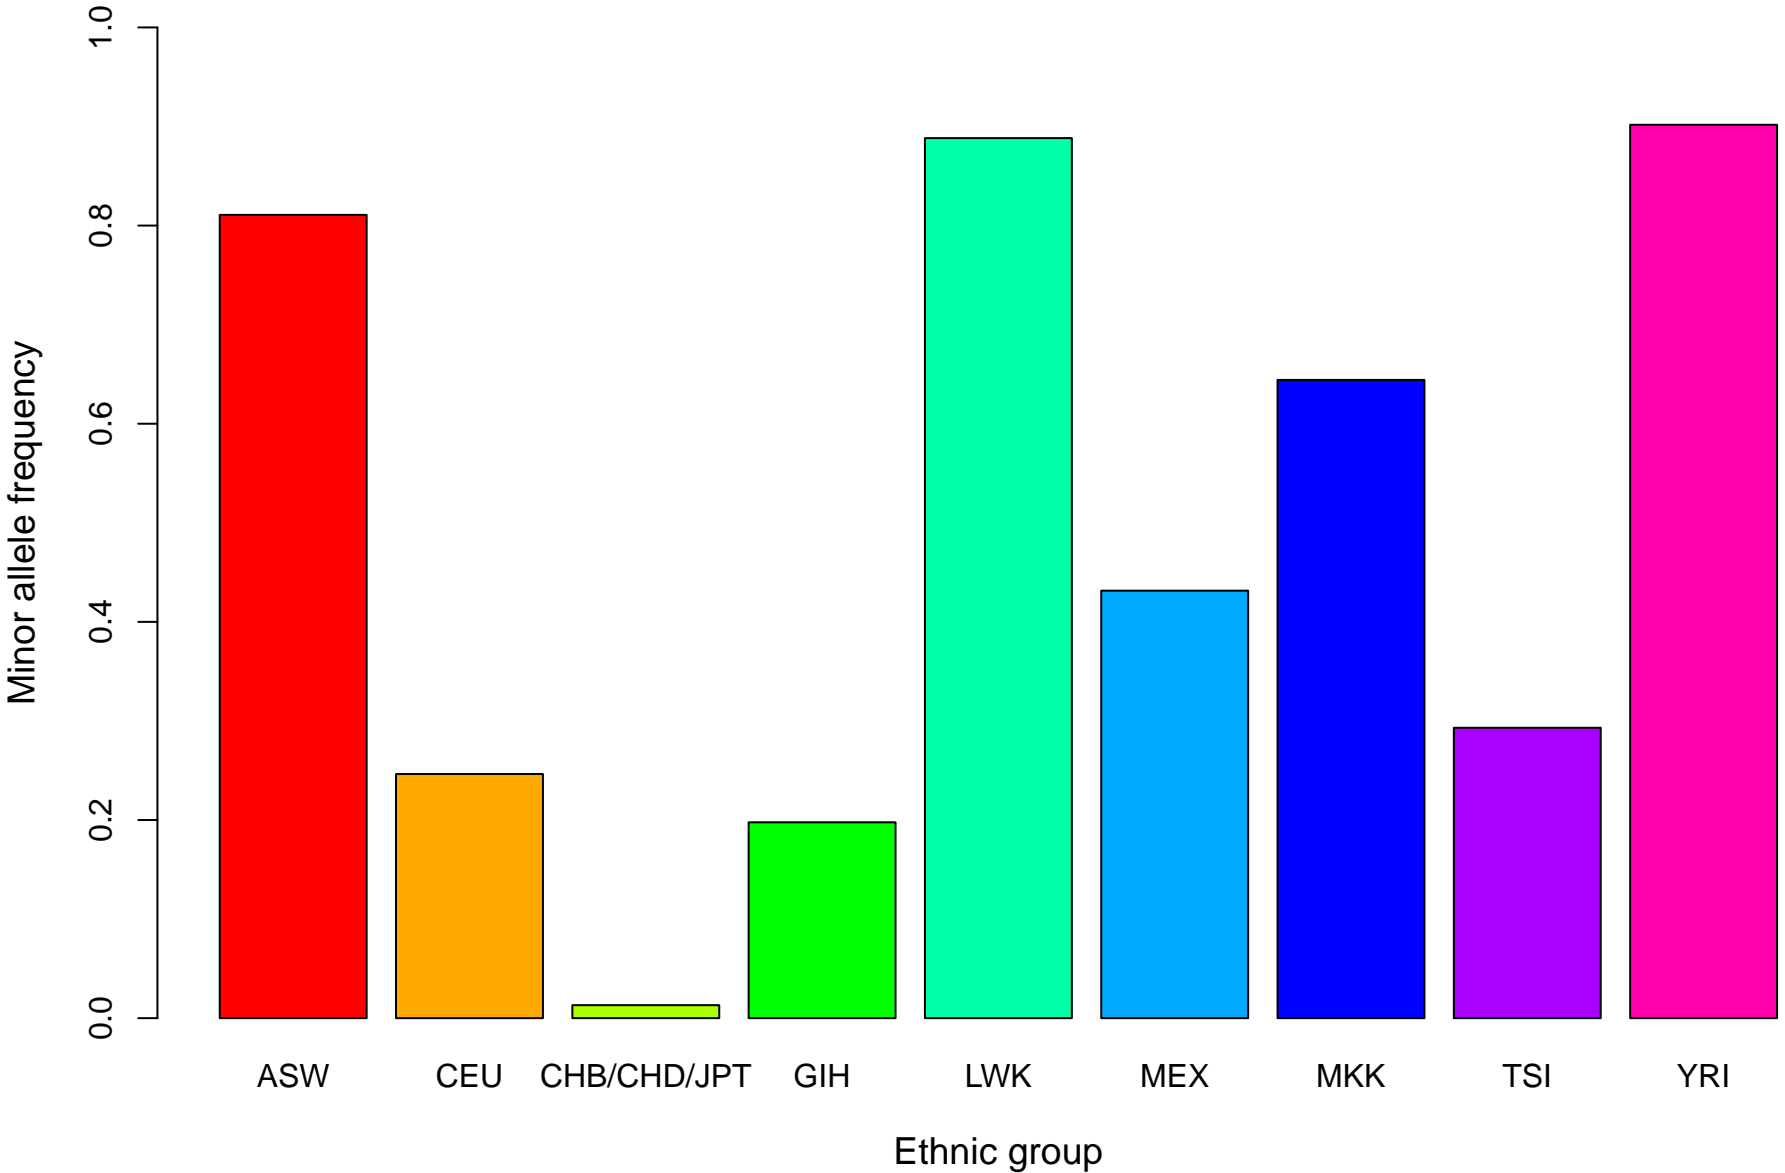

# rs2544395\_T

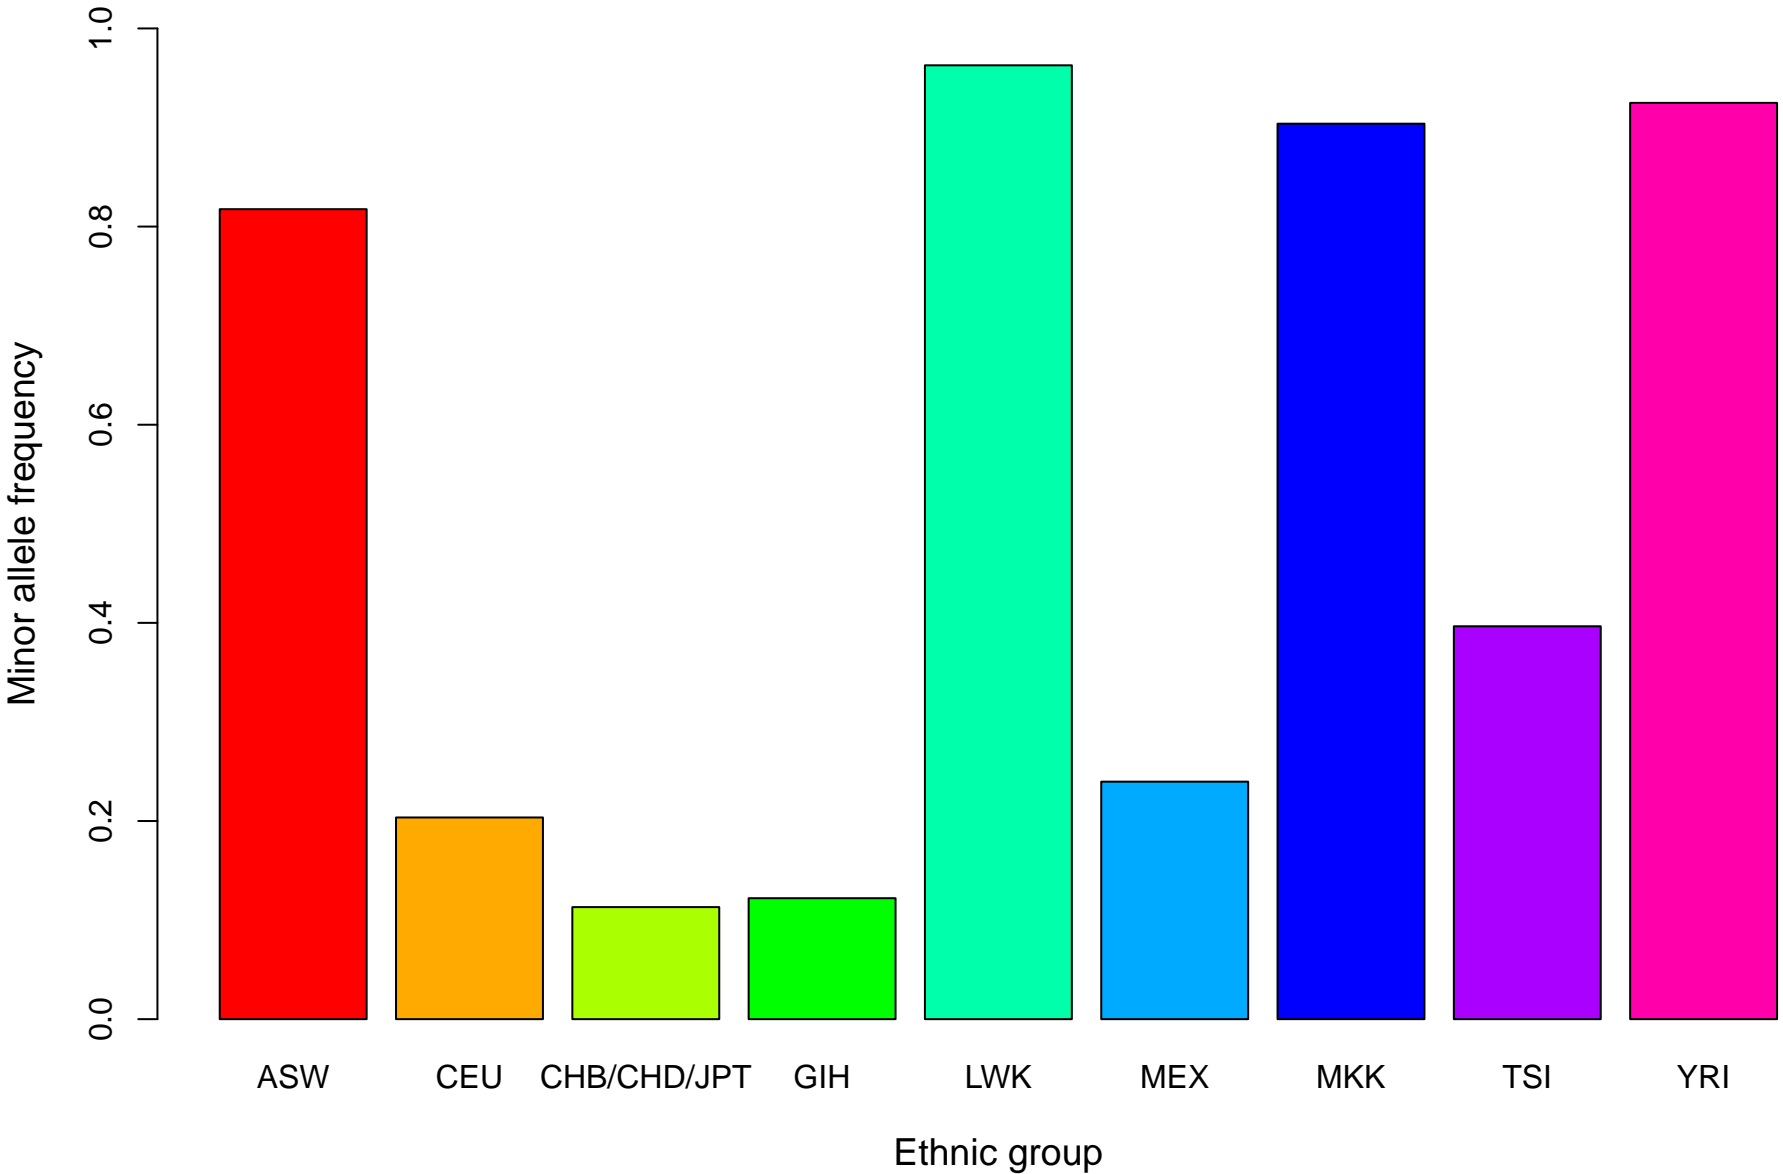

# rs1441166\_C

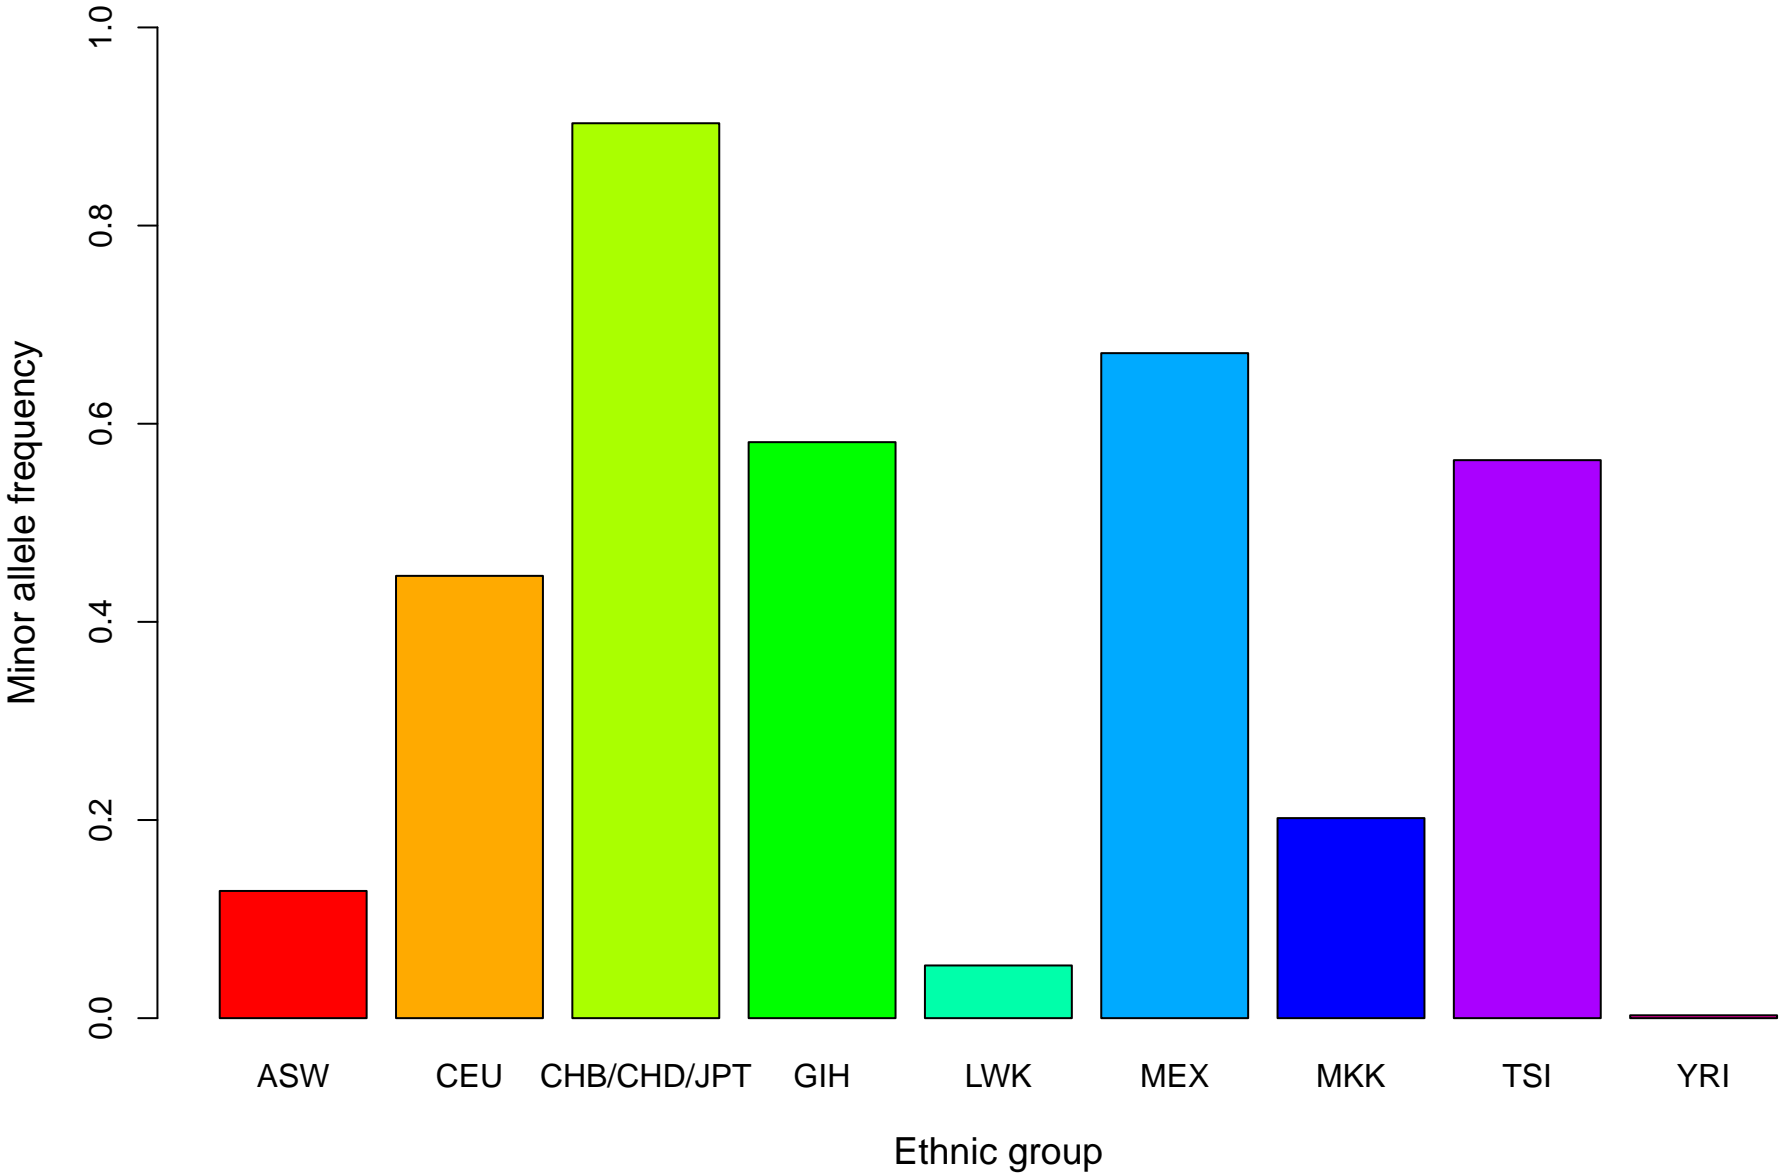

# rs9519977\_A

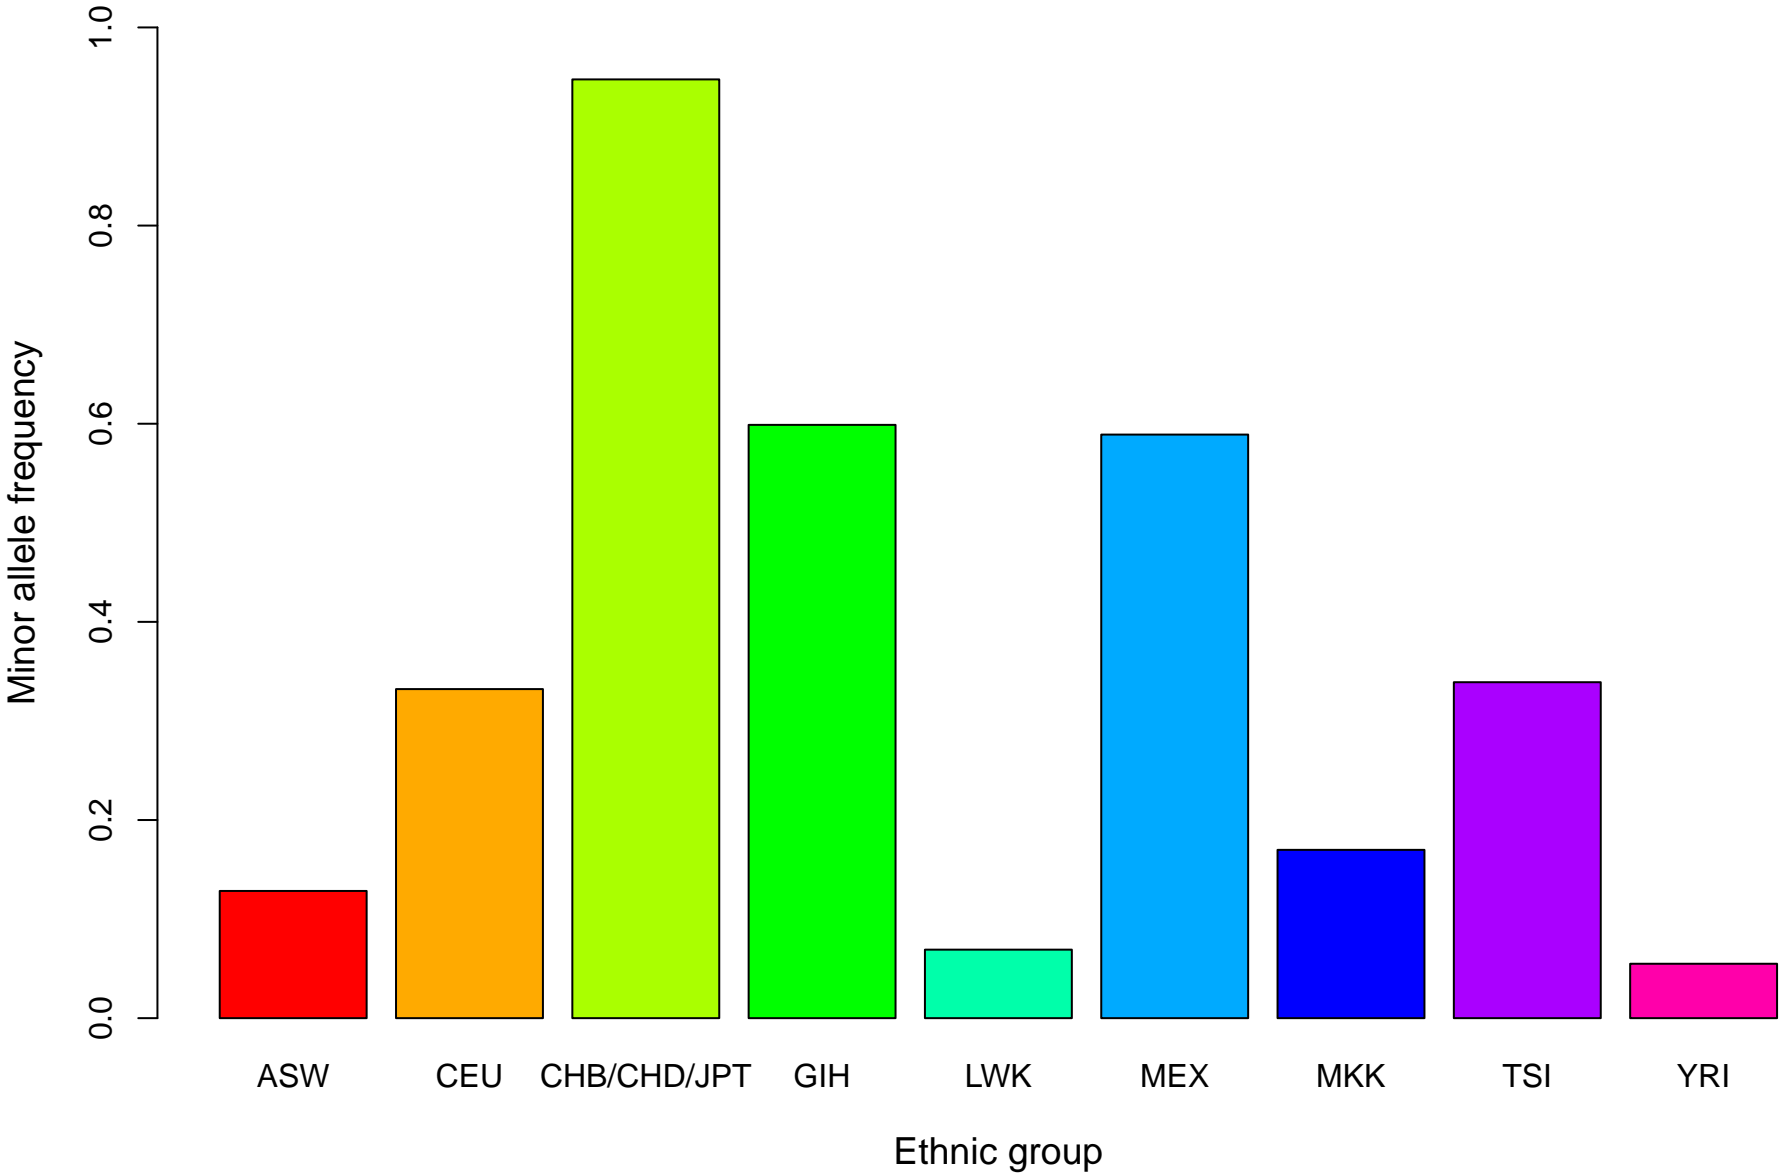



# rs11762273\_A

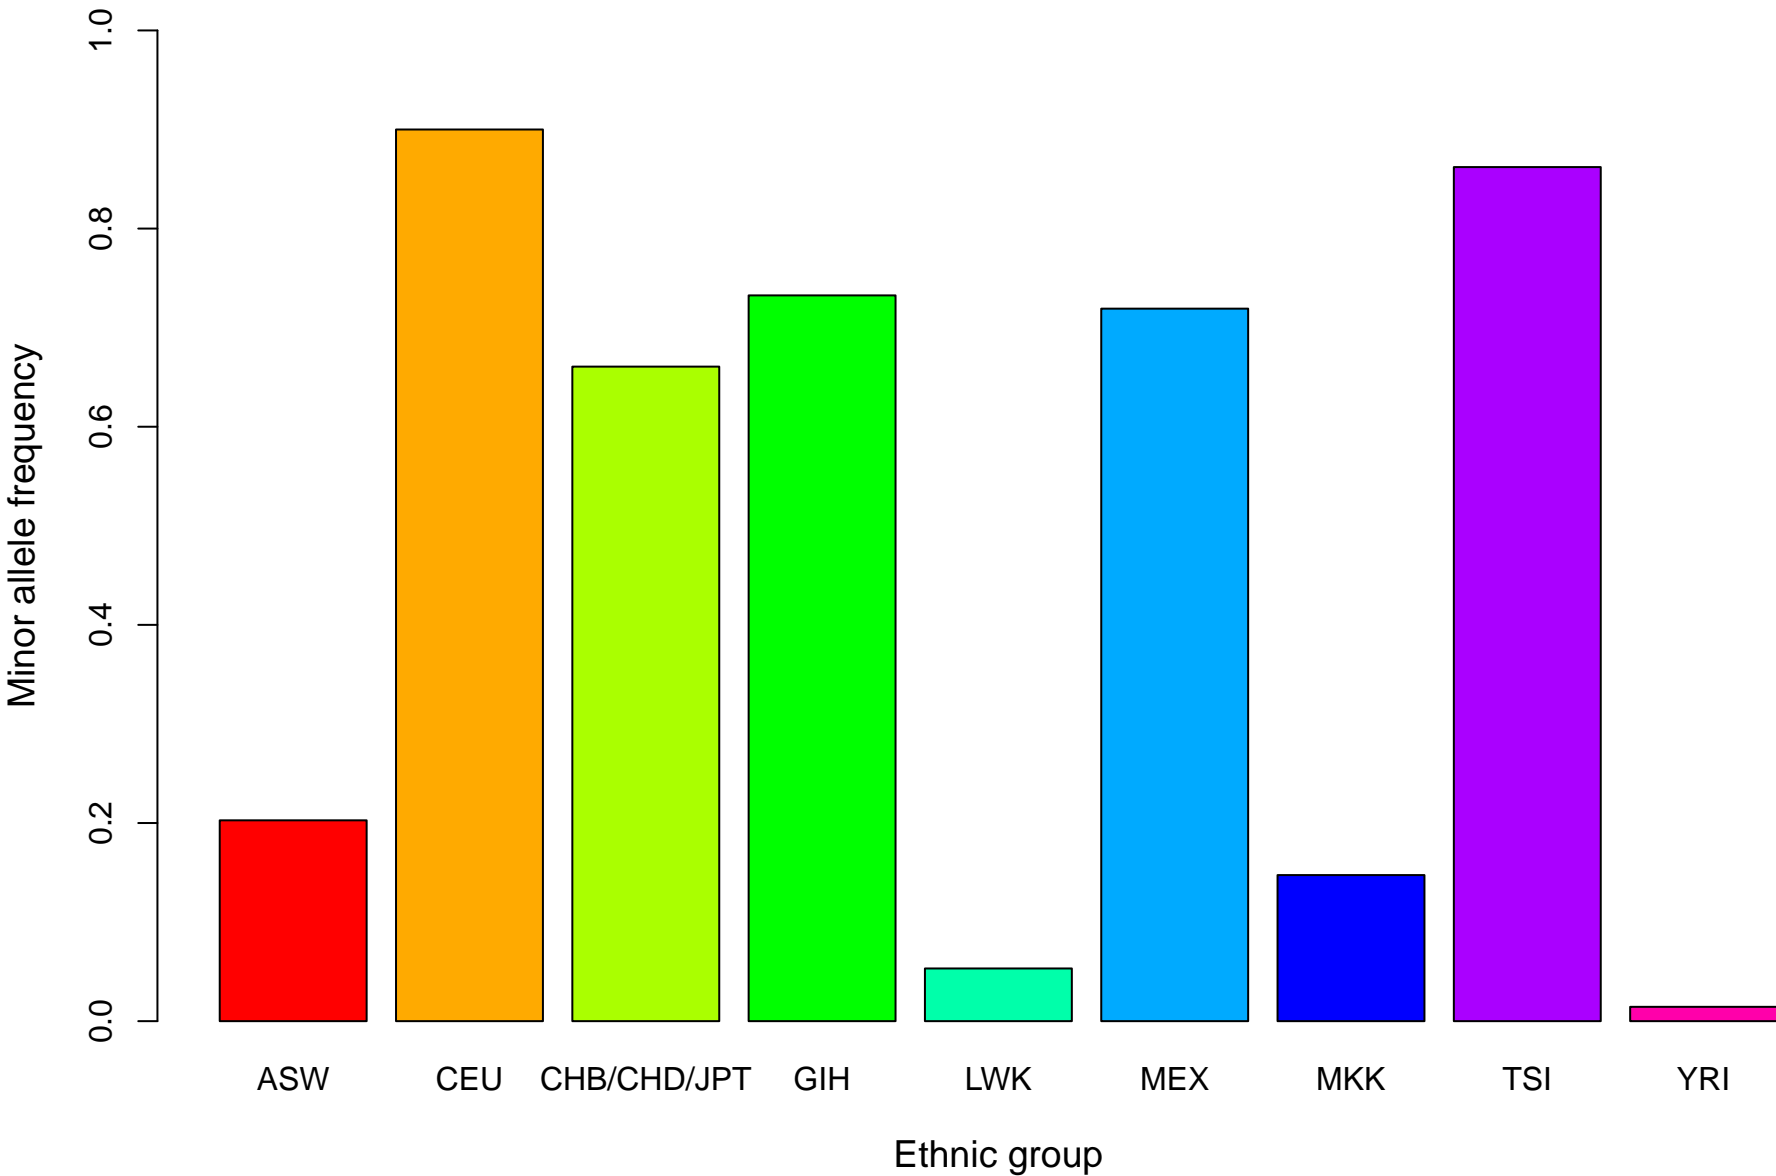

# rs2698193\_C

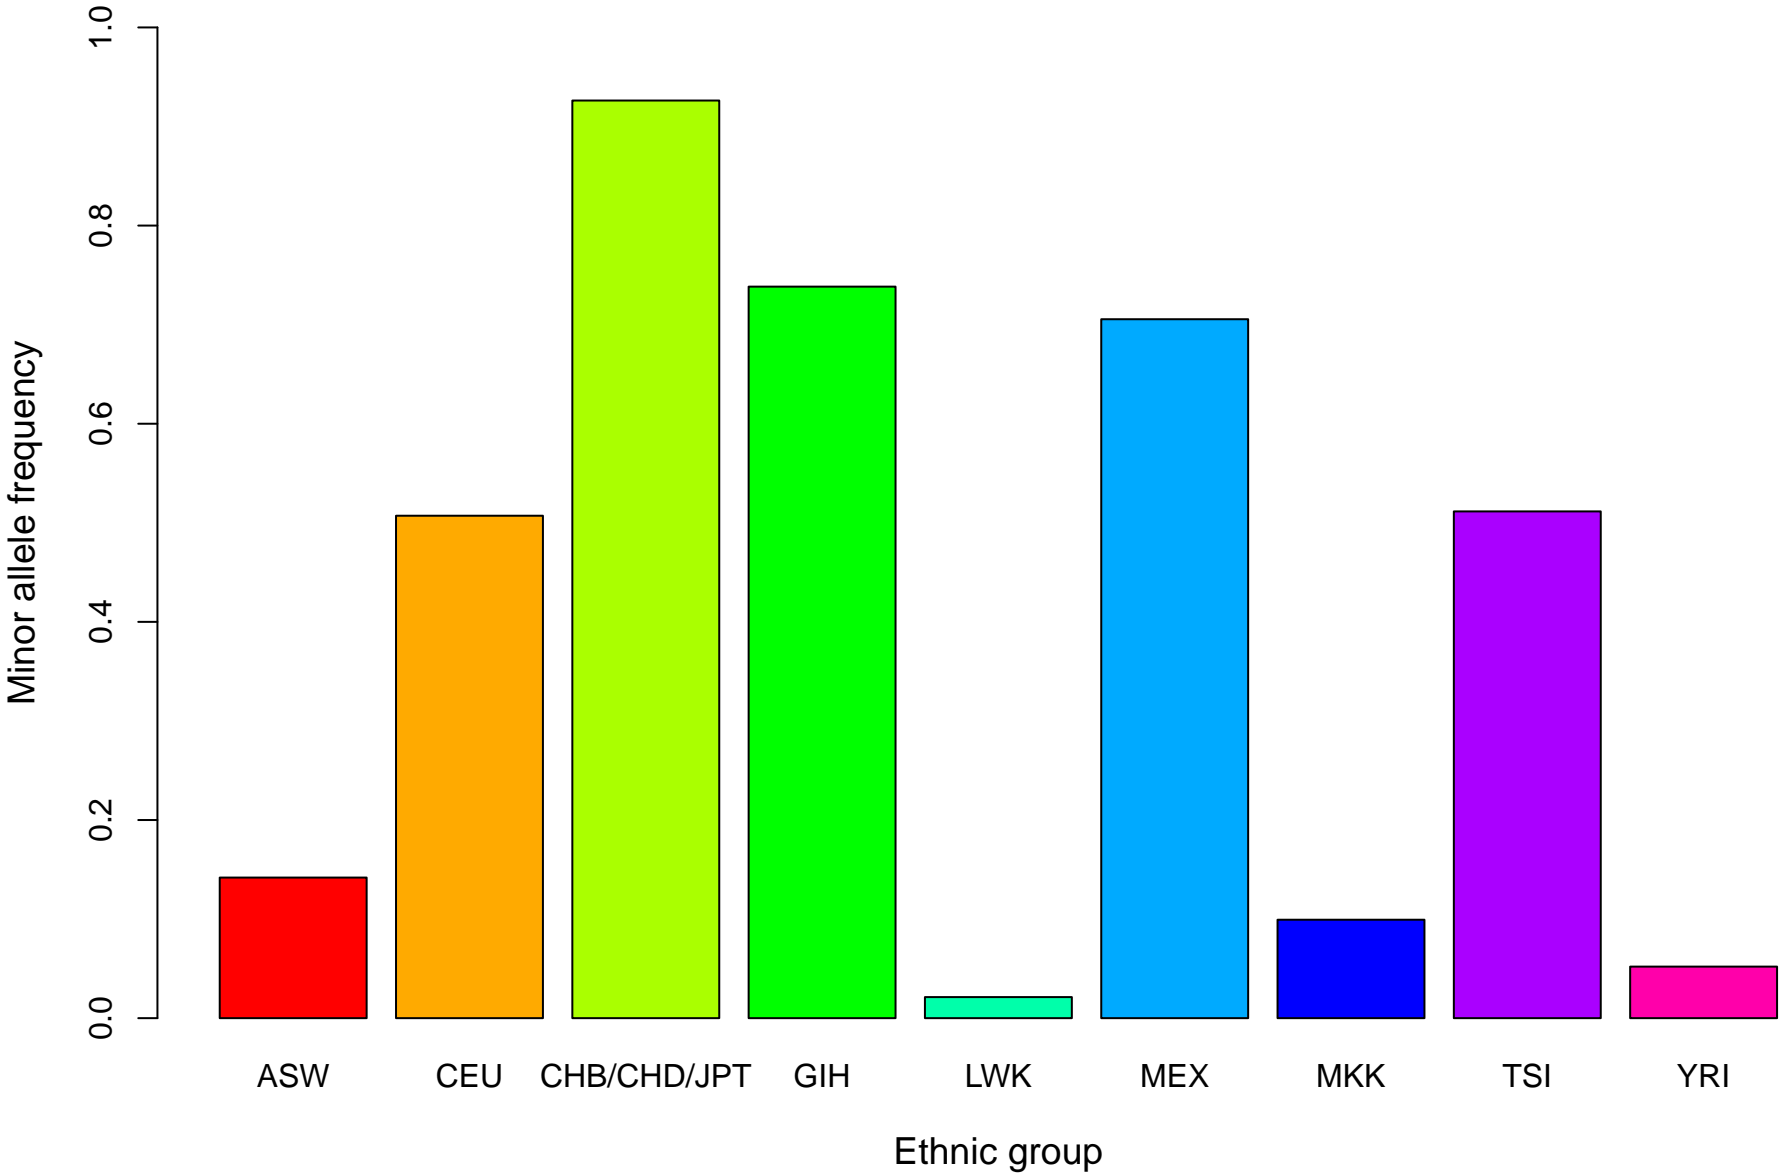

# rs1443486\_G

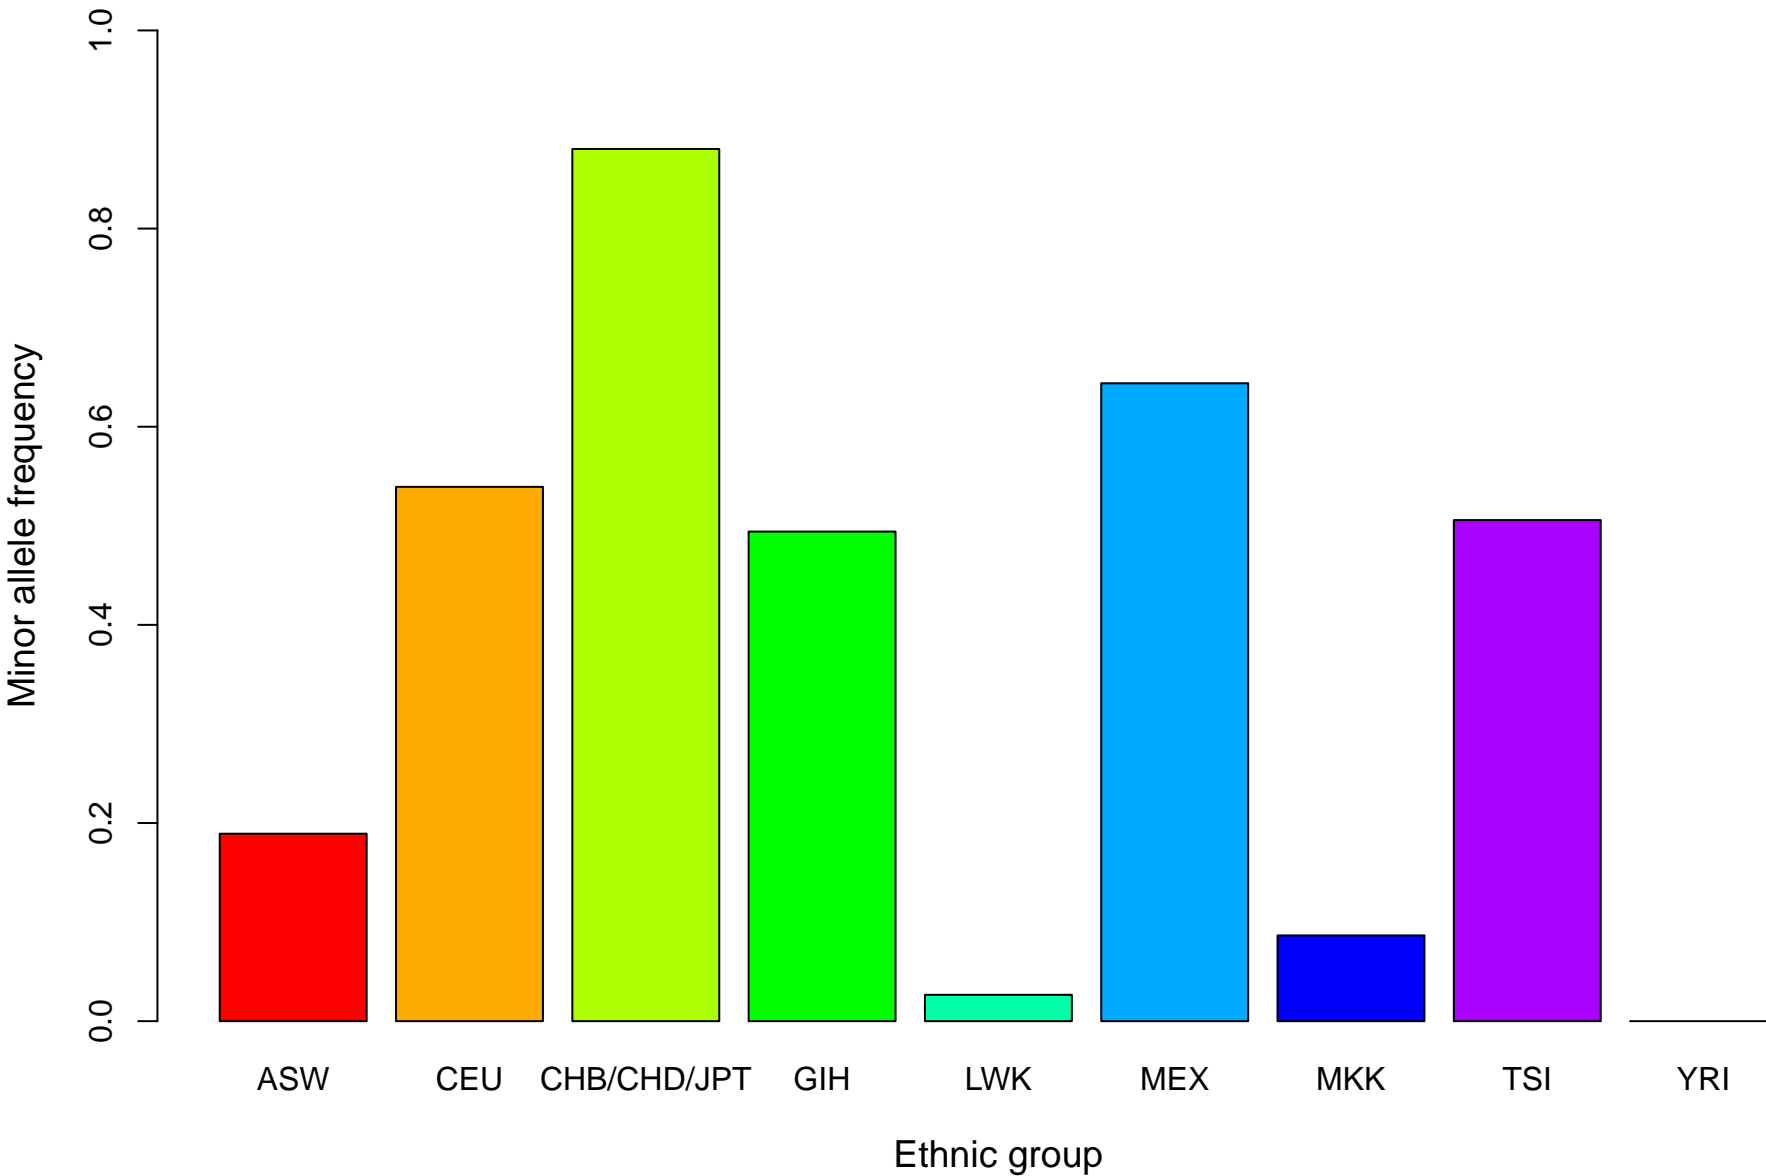

# rs734312\_A

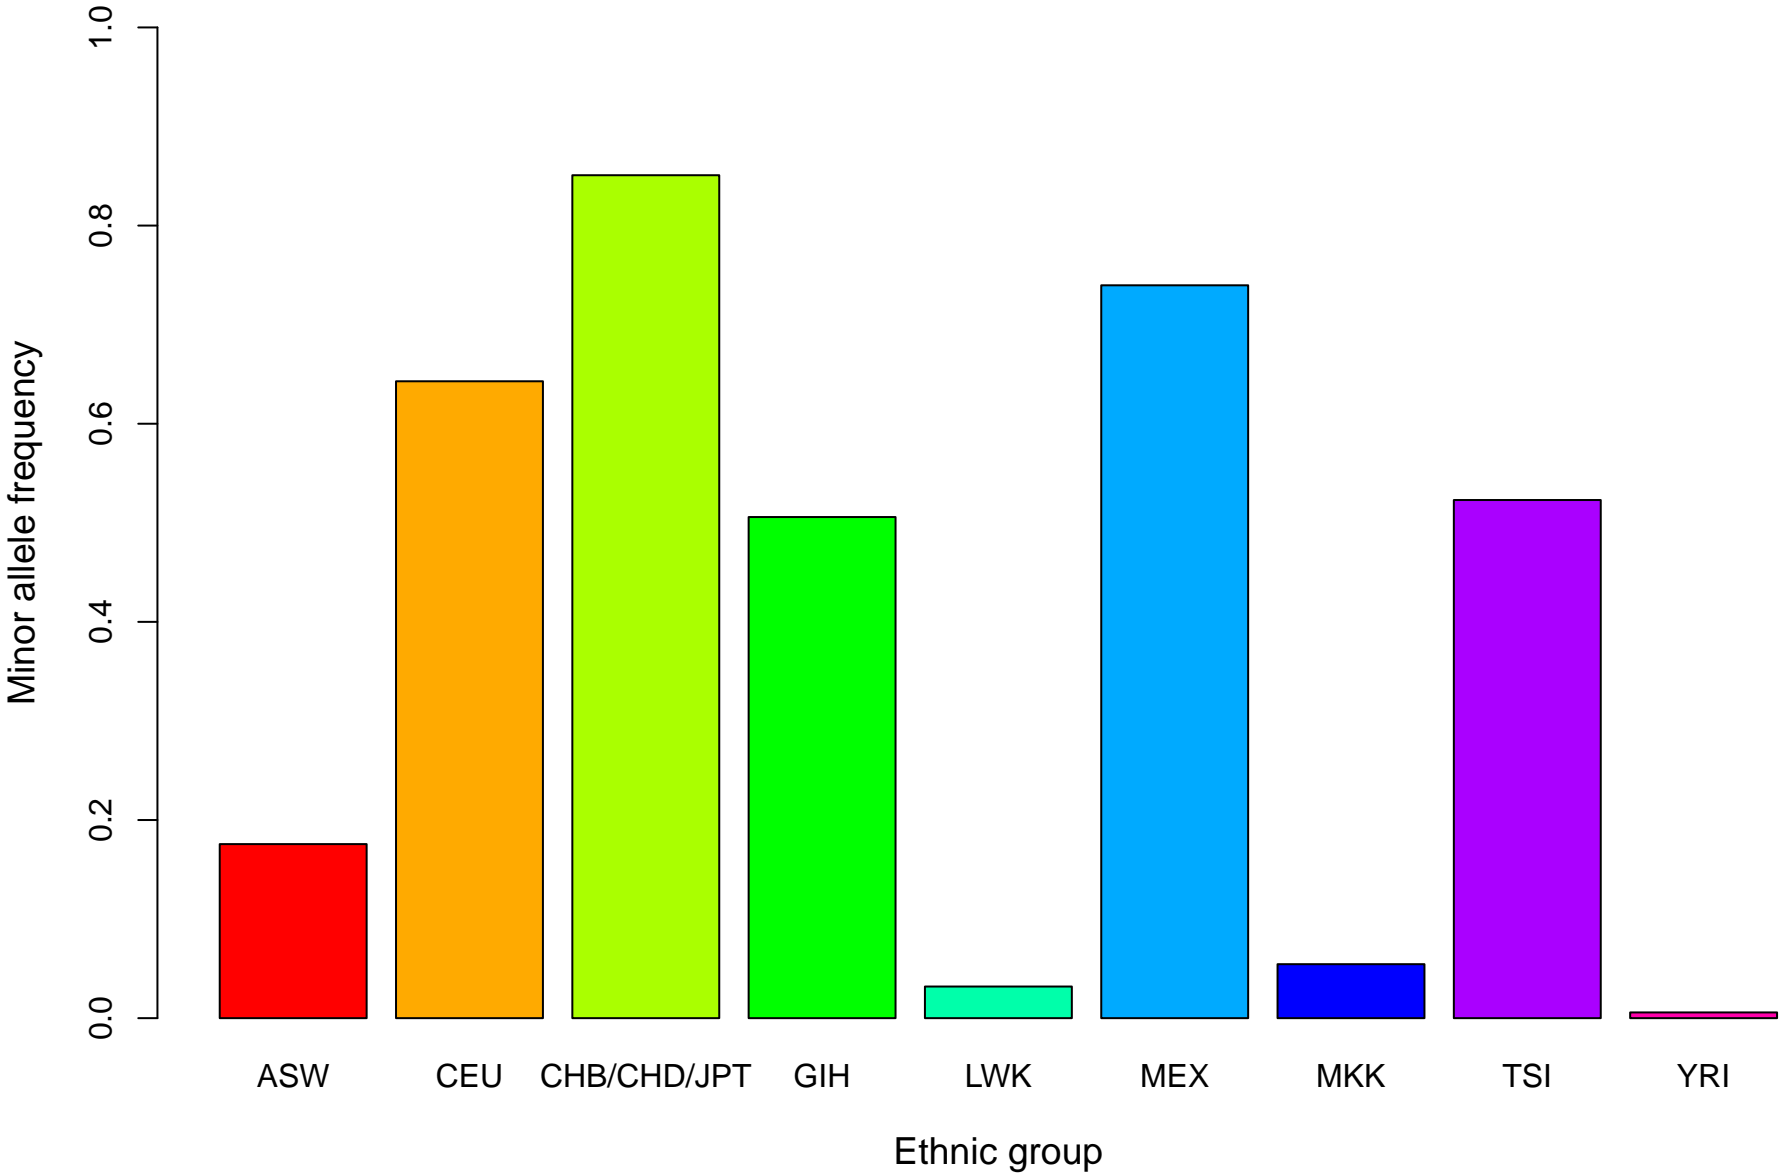

# rs3861458\_G

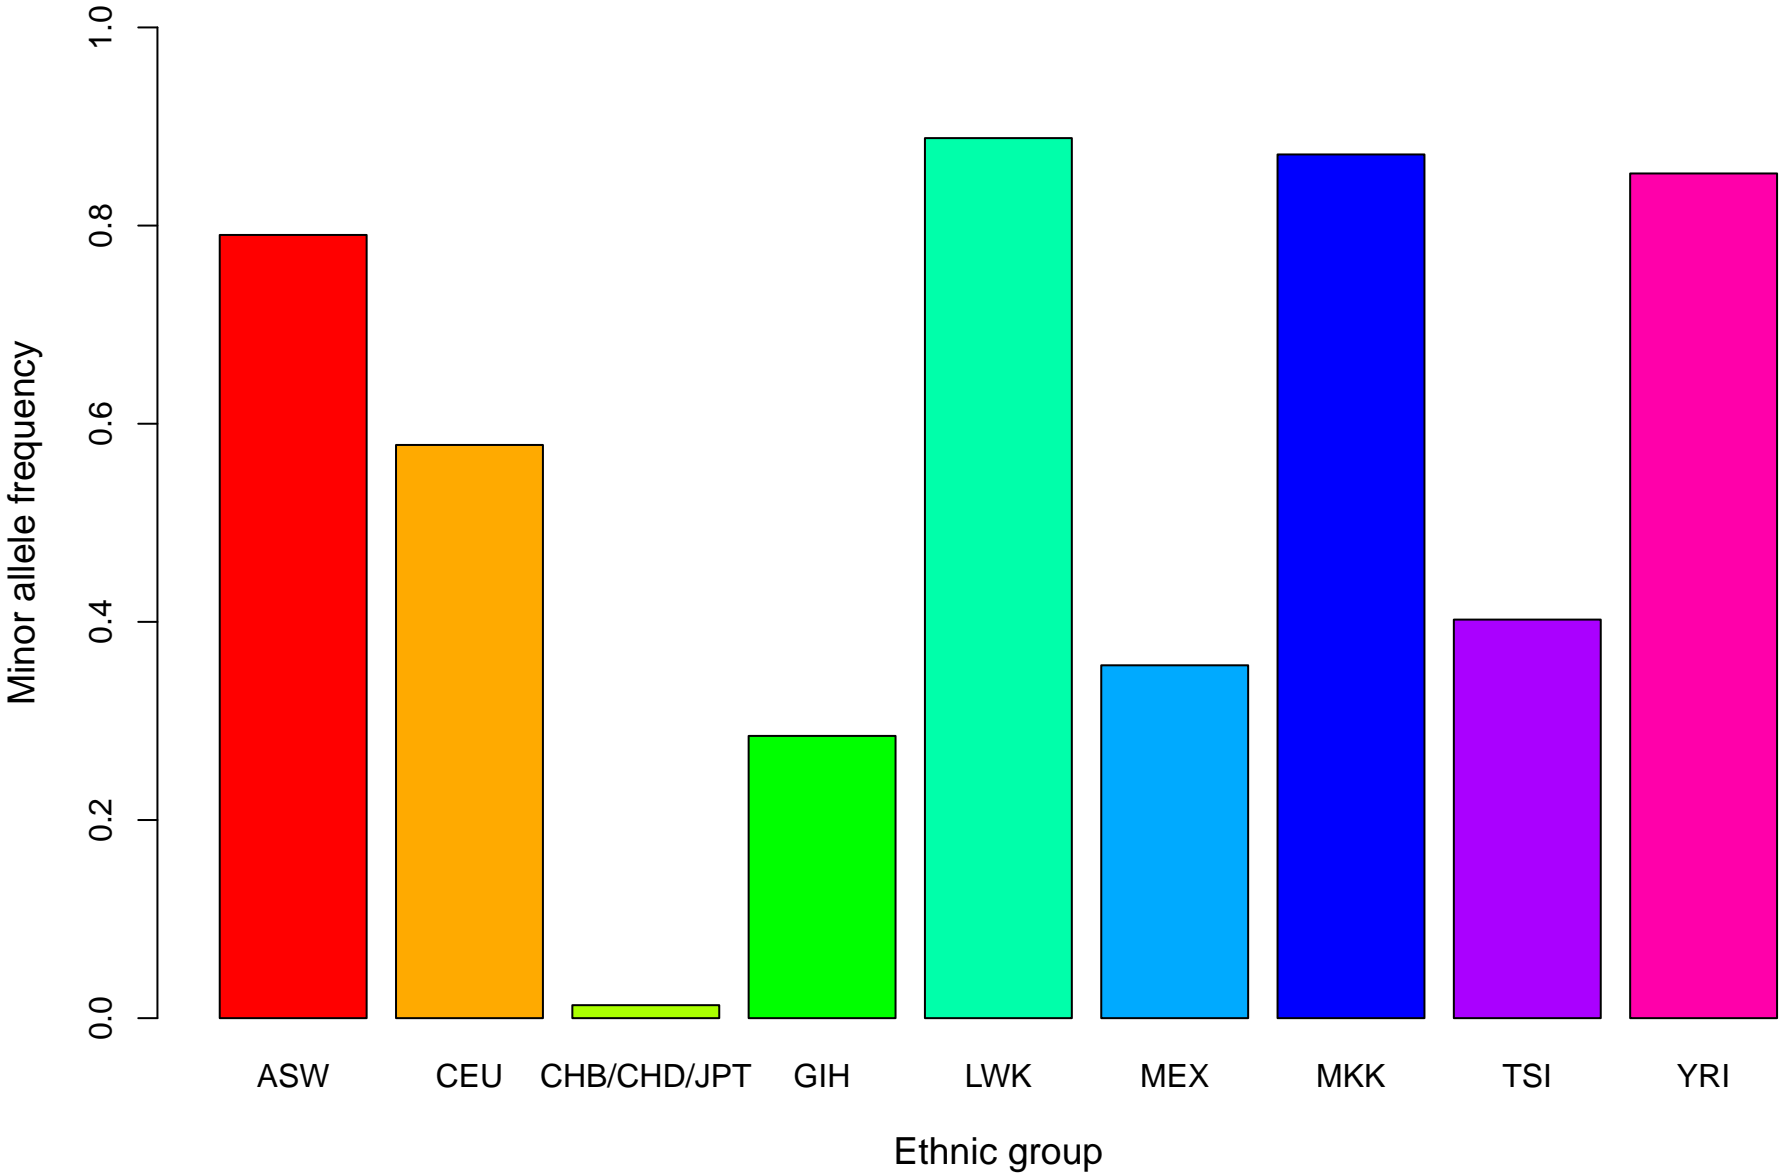

# rs13050131\_A

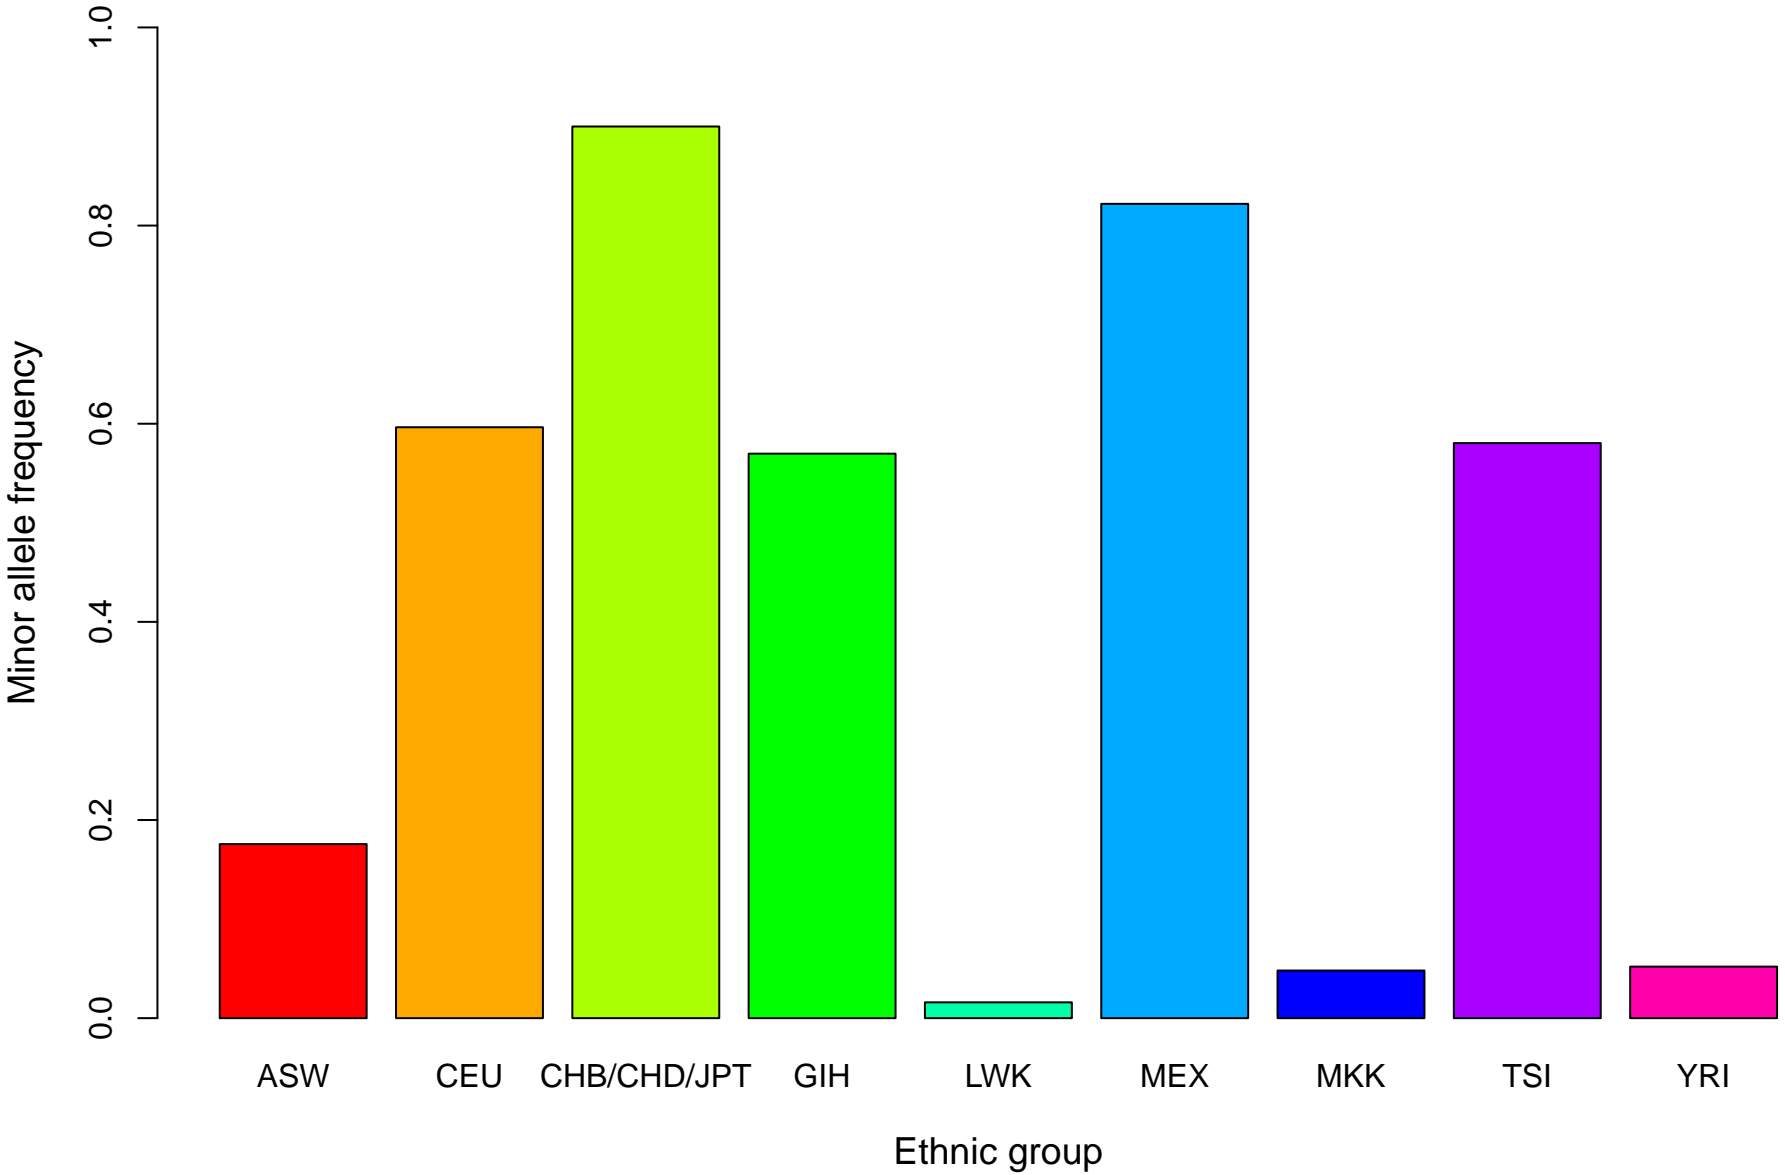

# rs635171\_A

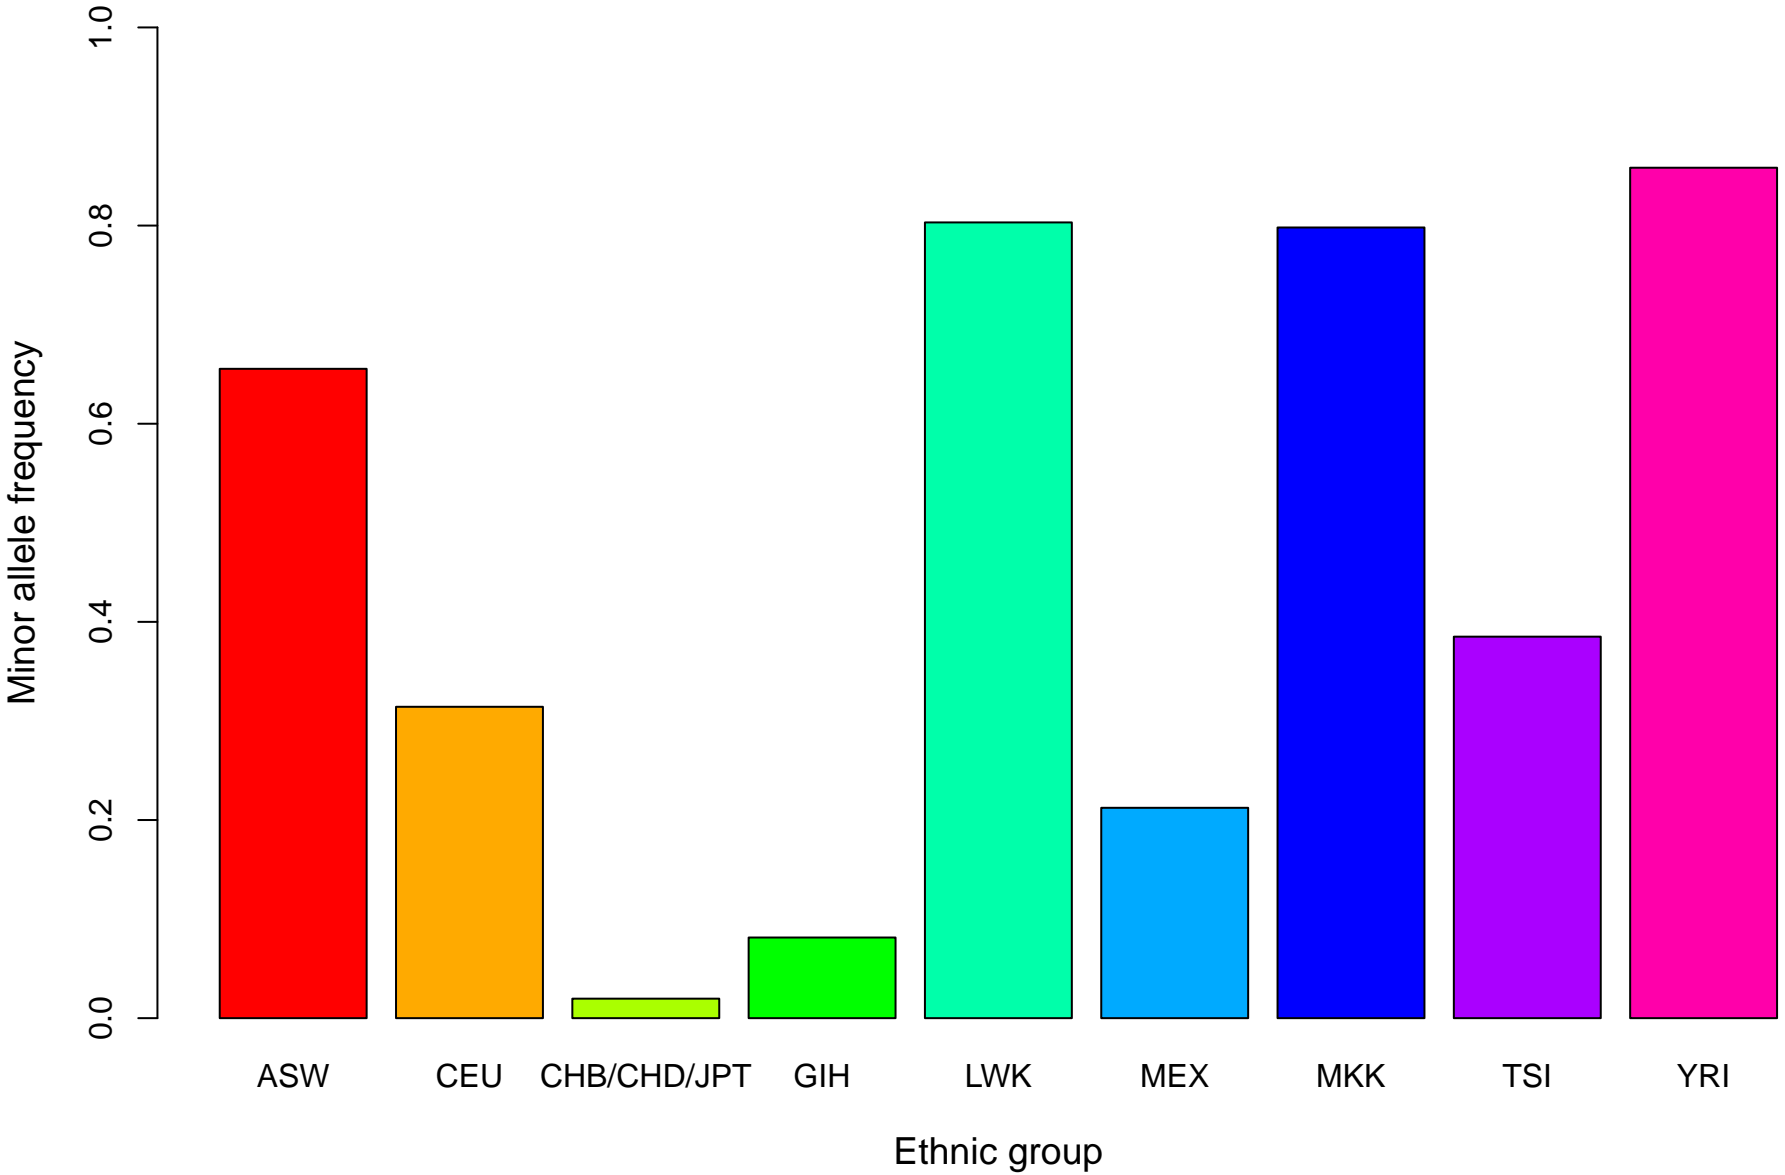

# rs3021494\_A

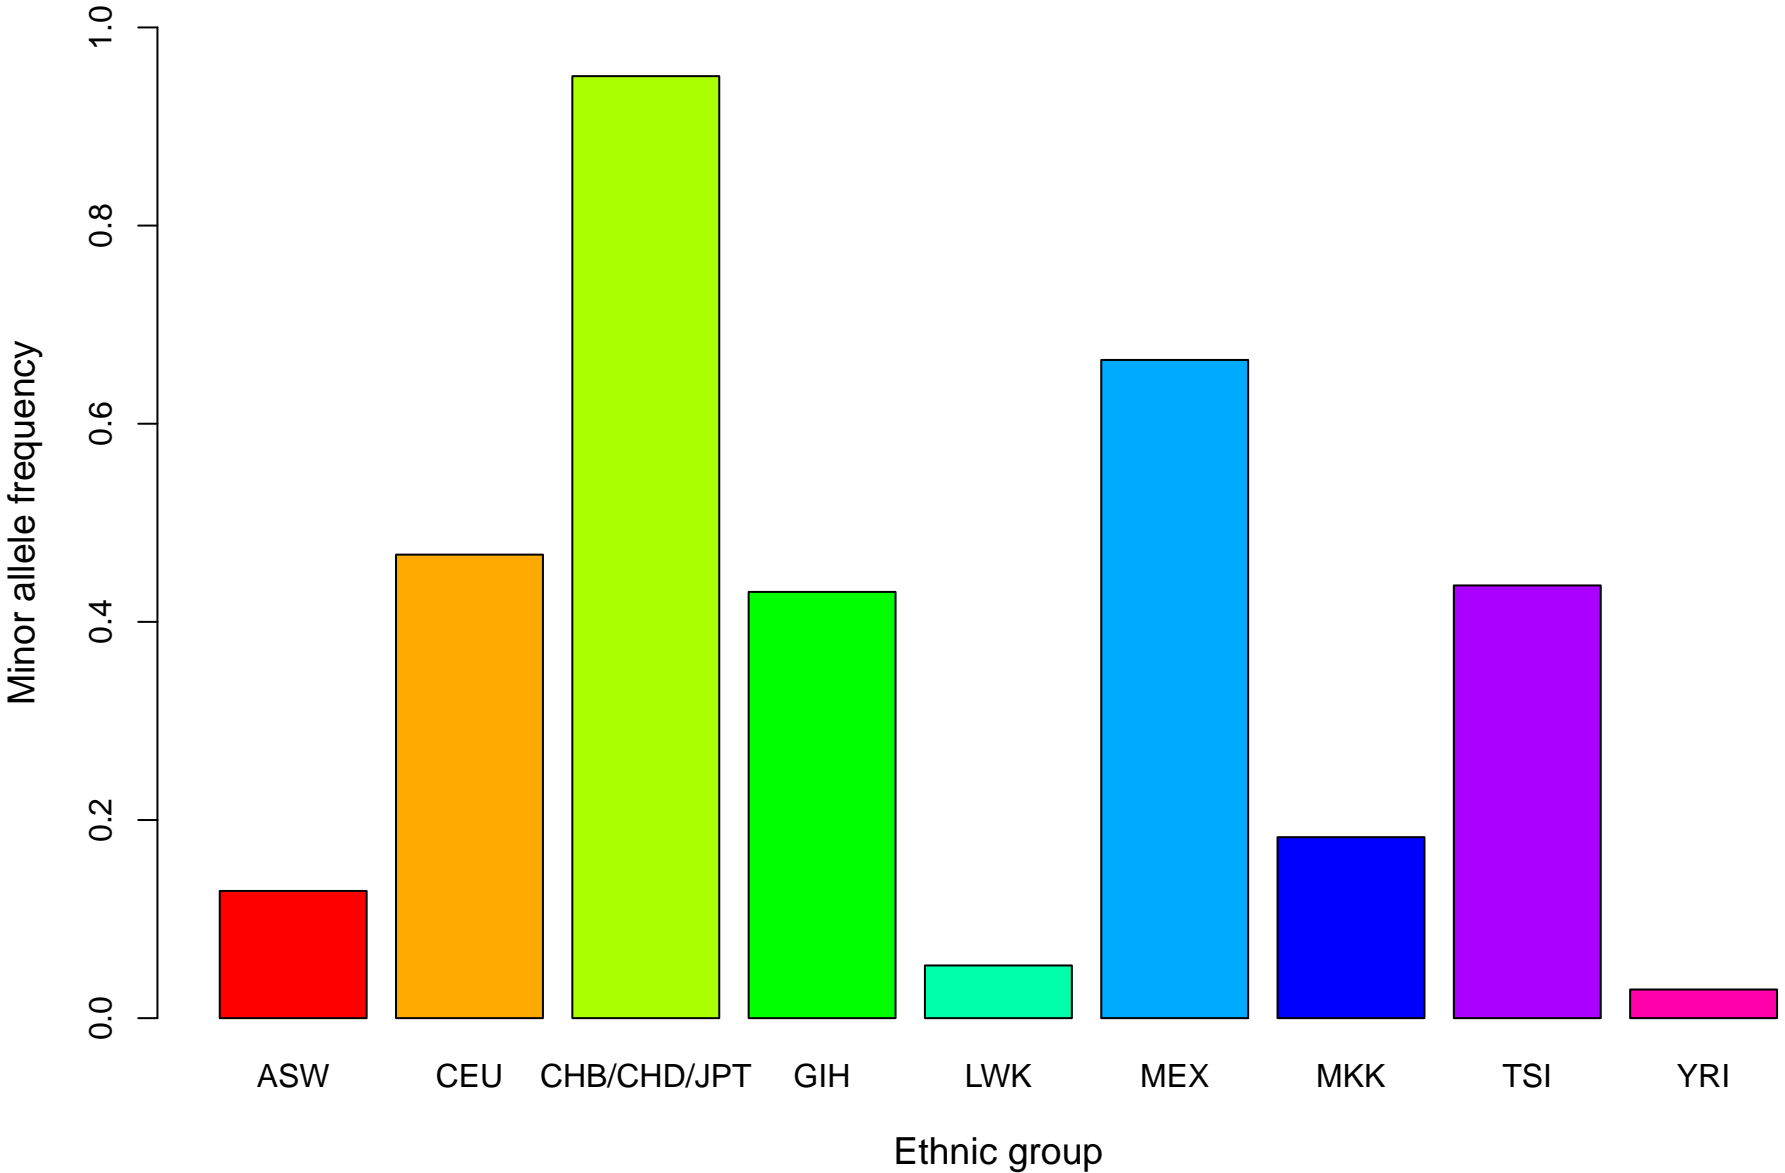



# rs9573349\_G

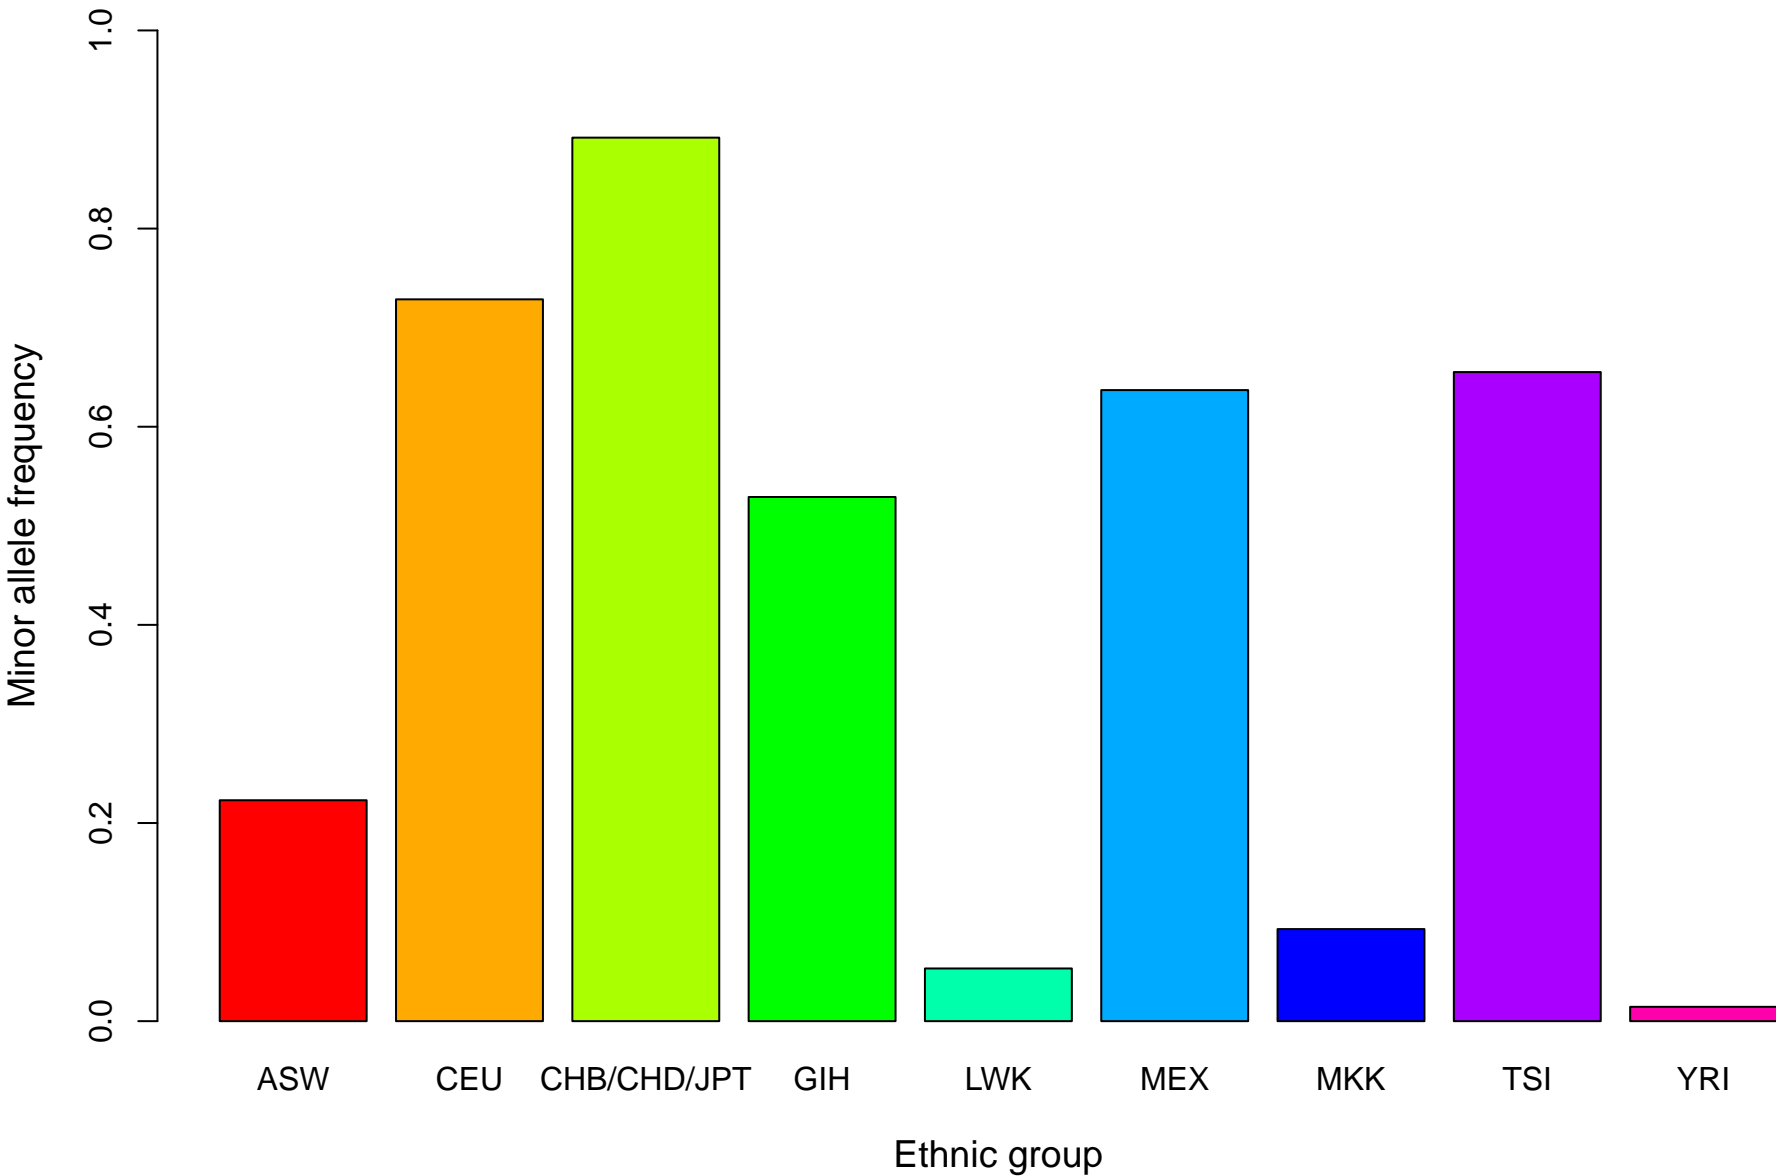

# rs6512211\_A

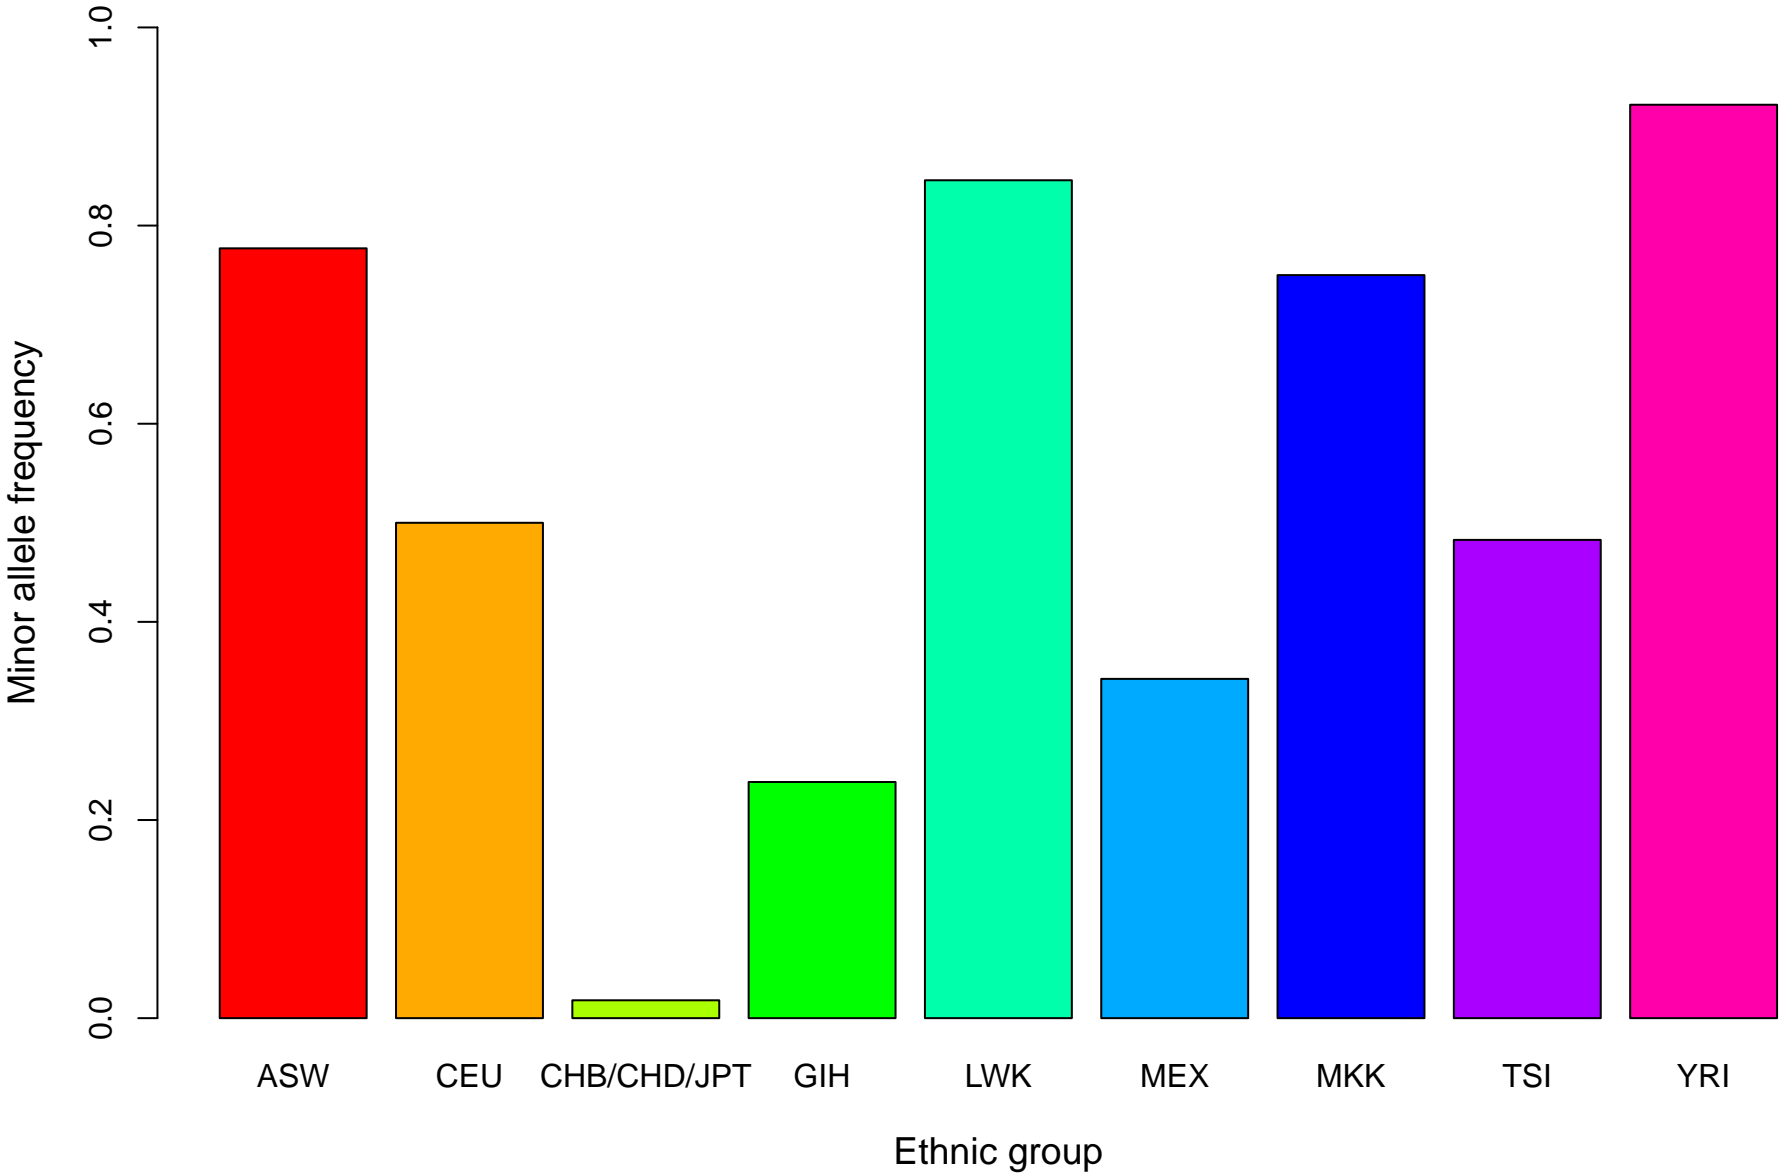

# rs7290134\_A

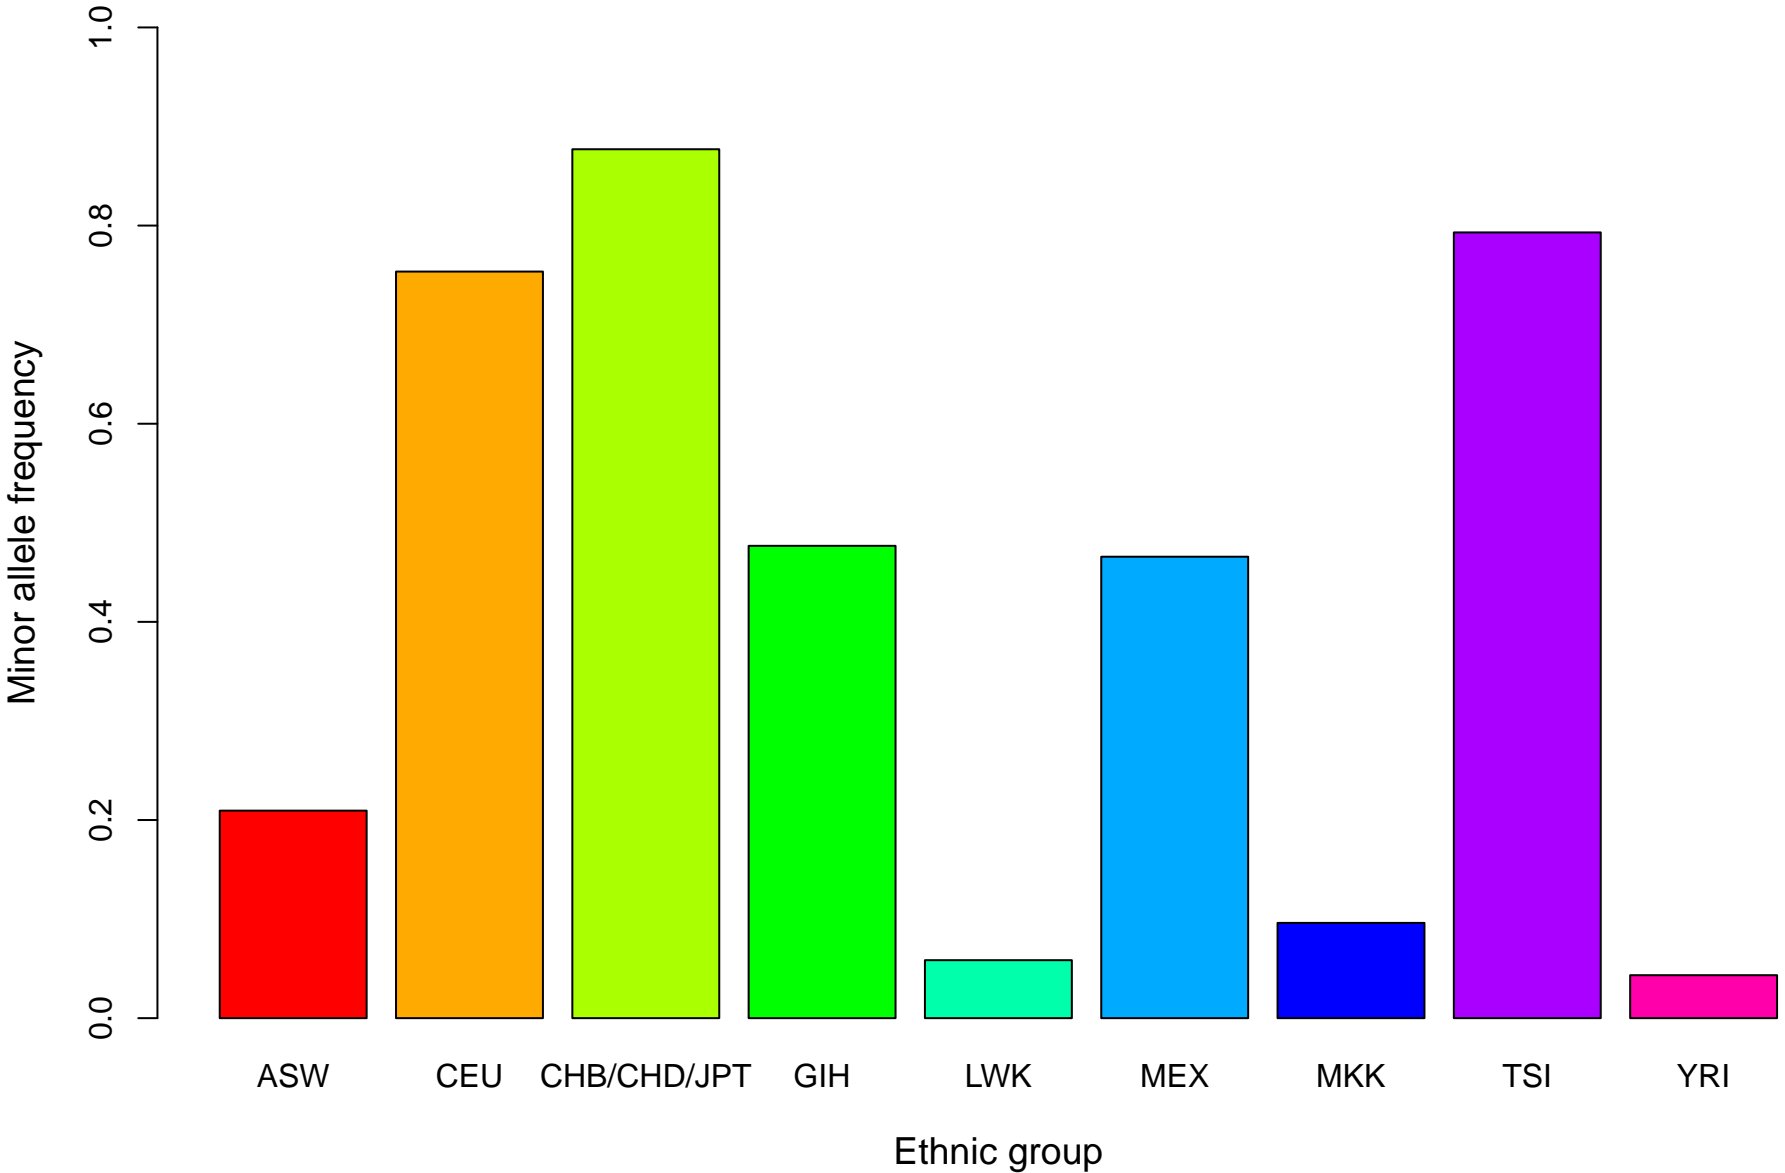

Supplement: 12864_2015_2328_MOESM3_ESM.pdf [file 12864_2015_2328_MOESM3_ESM.pdf]
